# Supplementary material
Source: PubMed Central journal article supplement (PMC6643901)
Supplement: ao8b02344_si_001.pdf [file ao8b02344_si_001.pdf]

## **Supporting Information**

Theoretical study on the mechanism of rearrangement reactions of bicyclic derivatives of cyclopropane to monocyclic derivatives under the catalysis of Pt-salt.

Arpita Chatterjee<sup>1</sup>, Sonjoy Mondal<sup>1</sup>, Rohini Saha<sup>1</sup>, Poulami Pal<sup>1</sup>, Kuheli Chakrabarty<sup>1</sup>,  
Gourab Kanti Das\*<sup>1</sup>.

<sup>1</sup>*Department of Chemistry, Visva-Bharati, Santiniketan-731235, West Bengal, INDIA.*

*\*Email: gourabkanti.das@visva-bharati.ac.in*

# Contents

|                                                                              |         |
|------------------------------------------------------------------------------|---------|
| 1. Full reference of Gaussian Software.                                      | S5      |
| 2. Potential energy surface as shown in Figure S1.                           | S6      |
| 3. Coordinate of the stationary points associated to the Figure.S1 (M06-2X)  | S7-S43  |
| 1                                                                            | S7      |
| b                                                                            | S8      |
| c                                                                            | S9      |
| 1MI <sub>1</sub>                                                             | S10     |
| 1MTS <sub>1</sub>                                                            | S11     |
| 1MI <sub>2</sub>                                                             | S12     |
| 1MTS <sub>2</sub>                                                            | S13     |
| 1MI <sub>3</sub>                                                             | S14     |
| 1MTS <sub>3</sub>                                                            | S15     |
| 1MI <sub>4</sub>                                                             | S16     |
| 1MI <sub>5</sub>                                                             | S17     |
| 1MTS <sub>5</sub>                                                            | S18     |
| 1MI <sub>6</sub>                                                             | S19     |
| 1MI <sub>5a</sub>                                                            | S20     |
| 1MTS <sub>5a</sub>                                                           | S21     |
| 1MI <sub>6a</sub>                                                            | S22     |
| 1MI <sub>7a</sub>                                                            | S23     |
| 1MTS <sub>7a</sub>                                                           | S24     |
| 1MI <sub>8a</sub>                                                            | S25     |
| 1DI <sub>1</sub>                                                             | S26-S27 |
| 1DTS <sub>1</sub>                                                            | S28     |
| 1DI <sub>2</sub>                                                             | S29-S30 |
| 1DTS <sub>2</sub>                                                            | S31     |
| 1DI <sub>3</sub>                                                             | S32     |
| 1DTS <sub>3</sub>                                                            | S33-S34 |
| 1DI <sub>4</sub>                                                             | S35     |
| 1DTS <sub>4-</sub>                                                           | S36-S37 |
| 1DI <sub>5</sub>                                                             | S38     |
| 1DTS <sub>4a</sub>                                                           | S39     |
| 1DI <sub>5a</sub>                                                            | S40     |
| 1DI <sub>6a</sub>                                                            | S41     |
| 1DTS <sub>6a</sub>                                                           | S42     |
| 1DI <sub>7a</sub>                                                            | S43     |
| 4. Potential energy surface as shown in Figure S2.                           | S44     |
| 5. Coordinate of the stationary points associated to the Figure S2. (M06-2X) | S45-S80 |
| 2                                                                            | S45     |
| b                                                                            | S46     |
| c                                                                            | S47     |
| S2                                                                           |         |

|                   |         |
|-------------------|---------|
| 2MI <sub>1</sub>  | S48     |
| 2MTS <sub>1</sub> | S49     |
| 2MI <sub>2</sub>  | S50     |
| 2MTS <sub>2</sub> | S51     |
| 2MI <sub>3</sub>  | S52     |
| 2MTS <sub>3</sub> | S53     |
| 2MI <sub>4</sub>  | S54     |
| 2MTS <sub>4</sub> | S55     |
| 2MI <sub>5</sub>  | S56     |
| 2MTS <sub>5</sub> | S57     |
| 2MI <sub>6</sub>  | S58     |
| 2DI <sub>1</sub>  | S59-S60 |
| 2DTS <sub>1</sub> | S61-S62 |
| 2DI <sub>2</sub>  | S63-S64 |
| 2DTS <sub>2</sub> | S65-S66 |
| 2DI <sub>3</sub>  | S67-S68 |
| 2DTS <sub>3</sub> | S69-S70 |
| 2DI <sub>4</sub>  | S71-S72 |
| 2DTS <sub>4</sub> | S73-S74 |
| 2DI <sub>5</sub>  | S75-S76 |
| 2DTS <sub>5</sub> | S77-S78 |
| 2DI <sub>6</sub>  | S79-S80 |

5. Coordinate optimized by M06 S81-S95

|                    |         |
|--------------------|---------|
| 1                  | S81     |
| b                  | S82     |
| c                  | S83     |
| 1MTS <sub>1</sub>  | S84     |
| 1MTS <sub>7a</sub> | S85     |
| 1DTS <sub>2</sub>  | S86-S87 |
| 1DTS <sub>6a</sub> | S88-S89 |
| 2                  | S90     |
| b                  | S91     |
| c                  | S92     |
| 2MTS <sub>5</sub>  | S93     |
| 2DTS <sub>1</sub>  | S94-S95 |

6. Coordinate Optimized geometries and energies of the stationary points with Ni and Pd metal S96-S136

|                    |           |
|--------------------|-----------|
| 1                  | S96       |
| b <sub>Pd</sub>    | S97       |
| 1PdI <sub>1</sub>  | S98-S99   |
| 1PdTS <sub>1</sub> | S100-S101 |
| 1PdI <sub>2</sub>  | S102-S103 |

S3

|                    |           |
|--------------------|-----------|
| 1PdI <sub>3</sub>  | S104-S105 |
| 1PdTS <sub>3</sub> | S106-S107 |
| 1PdI <sub>4</sub>  | S108-S109 |
| 1                  | S110      |
| b <sub>Ni</sub>    | S111      |
| 1NiI <sub>1</sub>  | S112-S113 |
| 1NiTS <sub>1</sub> | S114-S115 |
| 1NiI <sub>2</sub>  | S116-S117 |
| 1NiI <sub>3</sub>  | S118-S119 |
| 1NiTS <sub>3</sub> | S120-S121 |
| 1NiI <sub>4</sub>  | S122-S123 |
| 2                  | S124      |
| b <sub>Pd</sub>    | S125      |
| 2PdI <sub>1</sub>  | S126-S127 |
| 2PdTS <sub>1</sub> | S128-S129 |
| b <sub>Ni</sub>    | S130      |
| 2NiI <sub>1</sub>  | S131-S132 |
| 2NiTS <sub>1</sub> | S133-S134 |
| 2NiI <sub>2</sub>  | S135-S136 |

## **1. Gaussian 09 Full Reference**

**Gaussian 09, Revision C.01**, M. J. Frisch, G. W. Trucks, H. B. Schlegel, G. E. Scuseria, M. A. Robb, J. R. Cheeseman, G. Scalmani, V. Barone, B. Mennucci, G. A. Petersson, H. Nakatsuji, M. Caricato, X. Li, H. P. Hratchian, A. F. Izmaylov, J. Bloino, G. Zheng, J. L. Sonnenberg, M. Hada, M. Ehara, K. Toyota, R. Fukuda, J. Hasegawa, M. Ishida, T. Nakajima, Y. Honda, O. Kitao, H. Nakai, T. Vreven, J. A. Montgomery, Jr., J. E. Peralta, F. Ogliaro, M. Bearpark, J. J. Heyd, E. Brothers, K. N. Kudin, V. N. Staroverov, T. Keith, R. Kobayashi, J. Normand, K. Raghavachari, A. Rendell, J. C. Burant, S. S. Iyengar, J. Tomasi, M. Cossi, N. Rega, J. M. Millam, M. Klene, J. E. Knox, J. B. Cross, V. Bakken, C. Adamo, J. Jaramillo, R. Gomperts, R. E. Stratmann, O. Yazyev, A. J. Austin, R. Cammi, C. Pomelli, J. W. Ochterski, R. L. Martin, K. Morokuma, V. G. Zakrzewski, G. A. Voth, P. Salvador, J. J. Dannenberg, S. Dapprich, A. D. Daniels, O. Farkas, J. B. Foresman, J. V. Ortiz, J. Cioslowski and D. J. Fox, Gaussian, Inc., Wallingford CT, **2010**.

## **2. Computational methods:**

### *Computational Method used:*

Hybrid DFT functional method M06-2X, M06

### *Basis set used:*

LANL2TZf for platinum atom and 6-31G(d,p) basis set for other atoms.

### *Solvent used for calculation by PCM model:*

DiethylEther, Dichloromethane (DCM)



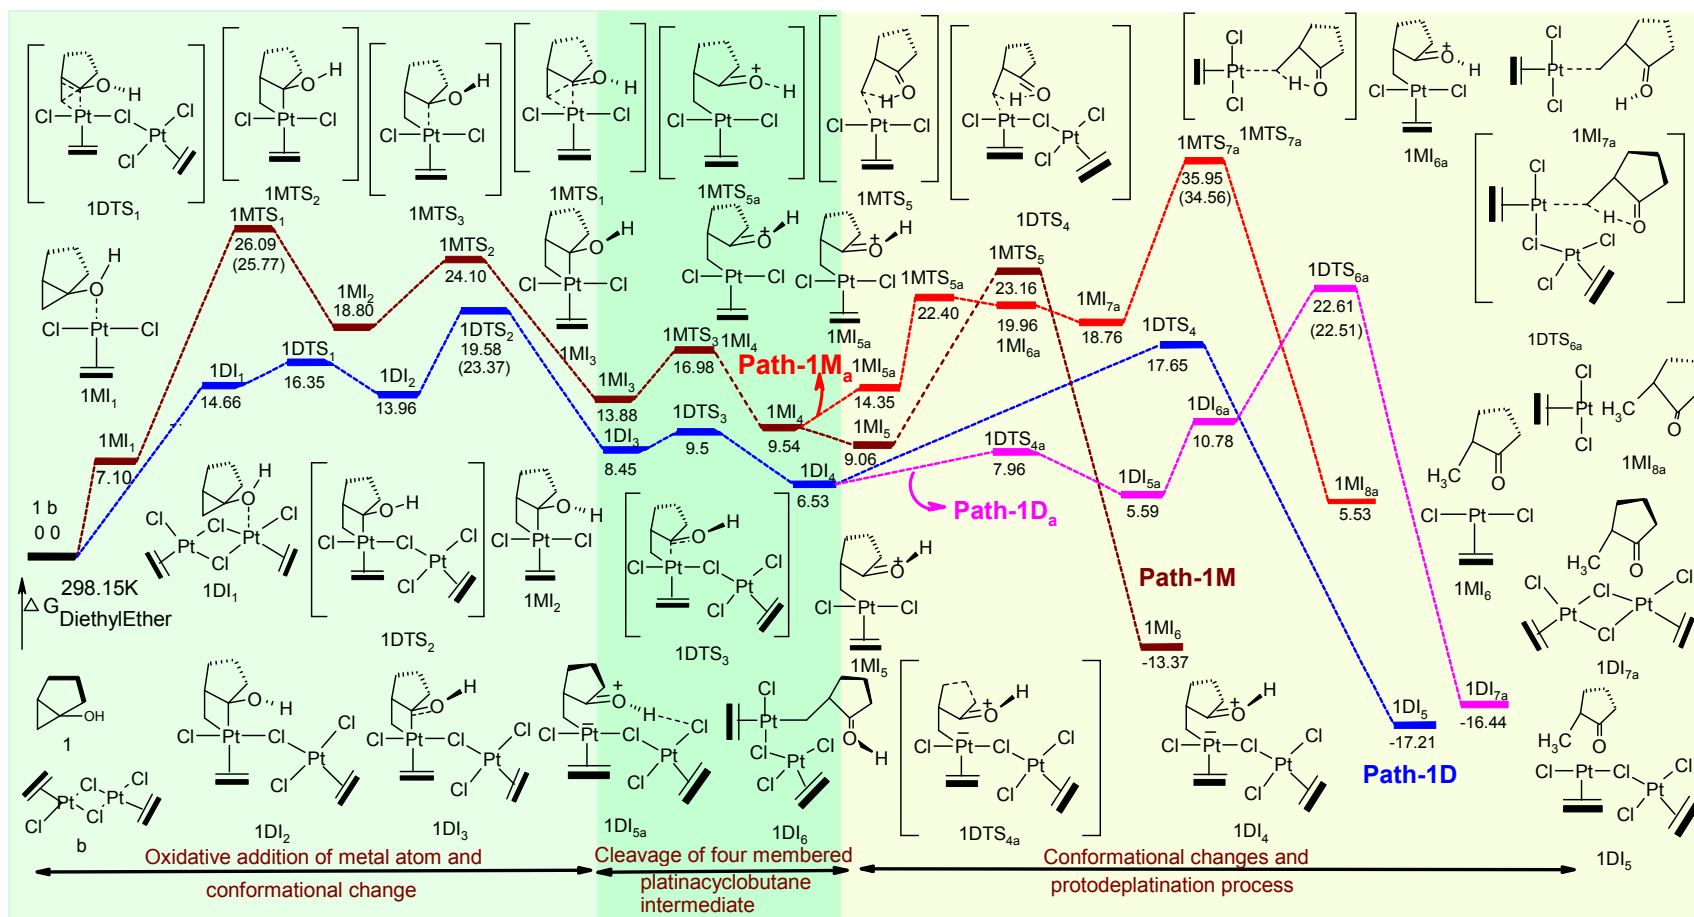

Figure S1. PES along with the thermodynamic parameters and structures of the stationary points of pathway-1M (brown colour), pathway-1M<sub>a</sub> (red colour), pathway-1D (blue colour) and pathway-1D<sub>a</sub> (magenta colour) under the catalytic condition of monomeric and dimeric form of Pt-salt. Energy values not enclosed in bracket are calculated using M06-2X functional. Values indicated in the round bracket are calculated using M06

functional.



| St.Pt.                                                                                                                                                                                                                                                                                                                                                                                                                                                                                                                                                                                                                                                                                                                                                                                                                                                                                                                                                                                                                                                                                                                                                                                                                                                                                                                                                                                                                        | General Structure                                                                 | Ball & Stick model                                                                  |                      |                |                                 |                                    |                                     |                              |                                      |                                               |         |         |          |   |         |         |         |   |         |          |         |   |          |          |         |   |         |          |         |   |         |         |         |   |          |         |         |   |         |         |         |   |          |         |         |   |          |         |         |   |          |         |          |   |          |          |          |   |          |          |          |   |          |          |          |   |          |         |          |   |         |          |          |                                                                                                                                                                                                                                                                                                                                                                                                                                                                                                                                                                                                                                                                                                                                                                                                                                                                                                                                                                                                                                                                                           |          |          |          |          |          |          |          |          |          |          |          |          |          |          |          |          |           |           |           |           |           |           |           |           |           |           |           |           |           |           |           |           |           |           |           |           |           |           |           |           |           |           |           |           |           |
|-------------------------------------------------------------------------------------------------------------------------------------------------------------------------------------------------------------------------------------------------------------------------------------------------------------------------------------------------------------------------------------------------------------------------------------------------------------------------------------------------------------------------------------------------------------------------------------------------------------------------------------------------------------------------------------------------------------------------------------------------------------------------------------------------------------------------------------------------------------------------------------------------------------------------------------------------------------------------------------------------------------------------------------------------------------------------------------------------------------------------------------------------------------------------------------------------------------------------------------------------------------------------------------------------------------------------------------------------------------------------------------------------------------------------------|-----------------------------------------------------------------------------------|-------------------------------------------------------------------------------------|----------------------|----------------|---------------------------------|------------------------------------|-------------------------------------|------------------------------|--------------------------------------|-----------------------------------------------|---------|---------|----------|---|---------|---------|---------|---|---------|----------|---------|---|----------|----------|---------|---|---------|----------|---------|---|---------|---------|---------|---|----------|---------|---------|---|---------|---------|---------|---|----------|---------|---------|---|----------|---------|---------|---|----------|---------|----------|---|----------|----------|----------|---|----------|----------|----------|---|----------|----------|----------|---|----------|---------|----------|---|---------|----------|----------|-------------------------------------------------------------------------------------------------------------------------------------------------------------------------------------------------------------------------------------------------------------------------------------------------------------------------------------------------------------------------------------------------------------------------------------------------------------------------------------------------------------------------------------------------------------------------------------------------------------------------------------------------------------------------------------------------------------------------------------------------------------------------------------------------------------------------------------------------------------------------------------------------------------------------------------------------------------------------------------------------------------------------------------------------------------------------------------------|----------|----------|----------|----------|----------|----------|----------|----------|----------|----------|----------|----------|----------|----------|----------|----------|-----------|-----------|-----------|-----------|-----------|-----------|-----------|-----------|-----------|-----------|-----------|-----------|-----------|-----------|-----------|-----------|-----------|-----------|-----------|-----------|-----------|-----------|-----------|-----------|-----------|-----------|-----------|-----------|-----------|
| 1                                                                                                                                                                                                                                                                                                                                                                                                                                                                                                                                                                                                                                                                                                                                                                                                                                                                                                                                                                                                                                                                                                                                                                                                                                                                                                                                                                                                                             | 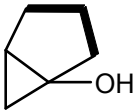 |  |                      |                |                                 |                                    |                                     |                              |                                      |                                               |         |         |          |   |         |         |         |   |         |          |         |   |          |          |         |   |         |          |         |   |         |         |         |   |          |         |         |   |         |         |         |   |          |         |         |   |          |         |         |   |          |         |          |   |          |          |          |   |          |          |          |   |          |          |          |   |          |         |          |   |         |          |          |                                                                                                                                                                                                                                                                                                                                                                                                                                                                                                                                                                                                                                                                                                                                                                                                                                                                                                                                                                                                                                                                                           |          |          |          |          |          |          |          |          |          |          |          |          |          |          |          |          |           |           |           |           |           |           |           |           |           |           |           |           |           |           |           |           |           |           |           |           |           |           |           |           |           |           |           |           |           |
| <p style="text-align: center;"><b><u>Cartesian co-ordinate</u></b></p> <table border="1"> <thead> <tr> <th>Atoms</th> <th>X</th> <th>Y</th> <th>Z</th> </tr> </thead> <tbody> <tr><td>C</td><td>-0.03028</td><td>-1.05068</td><td>-0.41217</td></tr> <tr><td>O</td><td>2.00227</td><td>0.38667</td><td>-0.52845</td></tr> <tr><td>C</td><td>0.74672</td><td>0.15044</td><td>0.02888</td></tr> <tr><td>C</td><td>0.57091</td><td>-1.00145</td><td>0.97587</td></tr> <tr><td>H</td><td>-0.07826</td><td>-0.90477</td><td>1.84133</td></tr> <tr><td>H</td><td>1.45155</td><td>-1.61605</td><td>1.12589</td></tr> <tr><td>H</td><td>2.55325</td><td>0.78977</td><td>0.15229</td></tr> <tr><td>C</td><td>-0.21550</td><td>1.31928</td><td>0.14884</td></tr> <tr><td>H</td><td>0.00395</td><td>1.98045</td><td>0.99447</td></tr> <tr><td>C</td><td>-1.60371</td><td>0.66350</td><td>0.25353</td></tr> <tr><td>H</td><td>-1.83307</td><td>0.43898</td><td>1.29968</td></tr> <tr><td>H</td><td>-2.40237</td><td>1.31192</td><td>-0.11380</td></tr> <tr><td>C</td><td>-1.48666</td><td>-0.64650</td><td>-0.55506</td></tr> <tr><td>H</td><td>-2.18673</td><td>-1.41105</td><td>-0.20396</td></tr> <tr><td>H</td><td>-1.70299</td><td>-0.45950</td><td>-1.61272</td></tr> <tr><td>H</td><td>-0.12787</td><td>1.90700</td><td>-0.77205</td></tr> <tr><td>H</td><td>0.41549</td><td>-1.73776</td><td>-1.12287</td></tr> </tbody> </table> |                                                                                   | Atoms                                                                               | X                    | Y              | Z                               | C                                  | -0.03028                            | -1.05068                     | -0.41217                             | O                                             | 2.00227 | 0.38667 | -0.52845 | C | 0.74672 | 0.15044 | 0.02888 | C | 0.57091 | -1.00145 | 0.97587 | H | -0.07826 | -0.90477 | 1.84133 | H | 1.45155 | -1.61605 | 1.12589 | H | 2.55325 | 0.78977 | 0.15229 | C | -0.21550 | 1.31928 | 0.14884 | H | 0.00395 | 1.98045 | 0.99447 | C | -1.60371 | 0.66350 | 0.25353 | H | -1.83307 | 0.43898 | 1.29968 | H | -2.40237 | 1.31192 | -0.11380 | C | -1.48666 | -0.64650 | -0.55506 | H | -2.18673 | -1.41105 | -0.20396 | H | -1.70299 | -0.45950 | -1.61272 | H | -0.12787 | 1.90700 | -0.77205 | H | 0.41549 | -1.73776 | -1.12287 | <p style="text-align: center;"><b><u>Frequencies</u></b></p> <table border="1"> <tbody> <tr><td>218.7186</td><td>249.7708</td><td>346.9290</td></tr> <tr><td>369.7460</td><td>389.5136</td><td>457.7402</td></tr> <tr><td>550.7976</td><td>618.5293</td><td>712.7037</td></tr> <tr><td>826.0150</td><td>847.4259</td><td>898.7741</td></tr> <tr><td>916.2375</td><td>921.1445</td><td>967.1094</td></tr> <tr><td>987.7957</td><td>1012.3285</td><td>1039.2903</td></tr> <tr><td>1065.7574</td><td>1099.6435</td><td>1125.4589</td></tr> <tr><td>1174.1473</td><td>1211.8734</td><td>1253.4906</td></tr> <tr><td>1274.9256</td><td>1290.3576</td><td>1330.2710</td></tr> <tr><td>1349.9471</td><td>1361.9481</td><td>1370.9121</td></tr> <tr><td>1425.9593</td><td>1501.3010</td><td>1506.3580</td></tr> <tr><td>1516.1429</td><td>1536.0356</td><td>3069.6620</td></tr> <tr><td>3076.7137</td><td>3096.2241</td><td>3117.9686</td></tr> <tr><td>3122.9285</td><td>3145.5093</td><td>3150.0545</td></tr> <tr><td>3221.3029</td><td>3241.3378</td><td>3880.0908</td></tr> </tbody> </table> | 218.7186 | 249.7708 | 346.9290 | 369.7460 | 389.5136 | 457.7402 | 550.7976 | 618.5293 | 712.7037 | 826.0150 | 847.4259 | 898.7741 | 916.2375 | 921.1445 | 967.1094 | 987.7957 | 1012.3285 | 1039.2903 | 1065.7574 | 1099.6435 | 1125.4589 | 1174.1473 | 1211.8734 | 1253.4906 | 1274.9256 | 1290.3576 | 1330.2710 | 1349.9471 | 1361.9481 | 1370.9121 | 1425.9593 | 1501.3010 | 1506.3580 | 1516.1429 | 1536.0356 | 3069.6620 | 3076.7137 | 3096.2241 | 3117.9686 | 3122.9285 | 3145.5093 | 3150.0545 | 3221.3029 | 3241.3378 | 3880.0908 |
| Atoms                                                                                                                                                                                                                                                                                                                                                                                                                                                                                                                                                                                                                                                                                                                                                                                                                                                                                                                                                                                                                                                                                                                                                                                                                                                                                                                                                                                                                         | X                                                                                 | Y                                                                                   | Z                    |                |                                 |                                    |                                     |                              |                                      |                                               |         |         |          |   |         |         |         |   |         |          |         |   |          |          |         |   |         |          |         |   |         |         |         |   |          |         |         |   |         |         |         |   |          |         |         |   |          |         |         |   |          |         |          |   |          |          |          |   |          |          |          |   |          |          |          |   |          |         |          |   |         |          |          |                                                                                                                                                                                                                                                                                                                                                                                                                                                                                                                                                                                                                                                                                                                                                                                                                                                                                                                                                                                                                                                                                           |          |          |          |          |          |          |          |          |          |          |          |          |          |          |          |          |           |           |           |           |           |           |           |           |           |           |           |           |           |           |           |           |           |           |           |           |           |           |           |           |           |           |           |           |           |
| C                                                                                                                                                                                                                                                                                                                                                                                                                                                                                                                                                                                                                                                                                                                                                                                                                                                                                                                                                                                                                                                                                                                                                                                                                                                                                                                                                                                                                             | -0.03028                                                                          | -1.05068                                                                            | -0.41217             |                |                                 |                                    |                                     |                              |                                      |                                               |         |         |          |   |         |         |         |   |         |          |         |   |          |          |         |   |         |          |         |   |         |         |         |   |          |         |         |   |         |         |         |   |          |         |         |   |          |         |         |   |          |         |          |   |          |          |          |   |          |          |          |   |          |          |          |   |          |         |          |   |         |          |          |                                                                                                                                                                                                                                                                                                                                                                                                                                                                                                                                                                                                                                                                                                                                                                                                                                                                                                                                                                                                                                                                                           |          |          |          |          |          |          |          |          |          |          |          |          |          |          |          |          |           |           |           |           |           |           |           |           |           |           |           |           |           |           |           |           |           |           |           |           |           |           |           |           |           |           |           |           |           |
| O                                                                                                                                                                                                                                                                                                                                                                                                                                                                                                                                                                                                                                                                                                                                                                                                                                                                                                                                                                                                                                                                                                                                                                                                                                                                                                                                                                                                                             | 2.00227                                                                           | 0.38667                                                                             | -0.52845             |                |                                 |                                    |                                     |                              |                                      |                                               |         |         |          |   |         |         |         |   |         |          |         |   |          |          |         |   |         |          |         |   |         |         |         |   |          |         |         |   |         |         |         |   |          |         |         |   |          |         |         |   |          |         |          |   |          |          |          |   |          |          |          |   |          |          |          |   |          |         |          |   |         |          |          |                                                                                                                                                                                                                                                                                                                                                                                                                                                                                                                                                                                                                                                                                                                                                                                                                                                                                                                                                                                                                                                                                           |          |          |          |          |          |          |          |          |          |          |          |          |          |          |          |          |           |           |           |           |           |           |           |           |           |           |           |           |           |           |           |           |           |           |           |           |           |           |           |           |           |           |           |           |           |
| C                                                                                                                                                                                                                                                                                                                                                                                                                                                                                                                                                                                                                                                                                                                                                                                                                                                                                                                                                                                                                                                                                                                                                                                                                                                                                                                                                                                                                             | 0.74672                                                                           | 0.15044                                                                             | 0.02888              |                |                                 |                                    |                                     |                              |                                      |                                               |         |         |          |   |         |         |         |   |         |          |         |   |          |          |         |   |         |          |         |   |         |         |         |   |          |         |         |   |         |         |         |   |          |         |         |   |          |         |         |   |          |         |          |   |          |          |          |   |          |          |          |   |          |          |          |   |          |         |          |   |         |          |          |                                                                                                                                                                                                                                                                                                                                                                                                                                                                                                                                                                                                                                                                                                                                                                                                                                                                                                                                                                                                                                                                                           |          |          |          |          |          |          |          |          |          |          |          |          |          |          |          |          |           |           |           |           |           |           |           |           |           |           |           |           |           |           |           |           |           |           |           |           |           |           |           |           |           |           |           |           |           |
| C                                                                                                                                                                                                                                                                                                                                                                                                                                                                                                                                                                                                                                                                                                                                                                                                                                                                                                                                                                                                                                                                                                                                                                                                                                                                                                                                                                                                                             | 0.57091                                                                           | -1.00145                                                                            | 0.97587              |                |                                 |                                    |                                     |                              |                                      |                                               |         |         |          |   |         |         |         |   |         |          |         |   |          |          |         |   |         |          |         |   |         |         |         |   |          |         |         |   |         |         |         |   |          |         |         |   |          |         |         |   |          |         |          |   |          |          |          |   |          |          |          |   |          |          |          |   |          |         |          |   |         |          |          |                                                                                                                                                                                                                                                                                                                                                                                                                                                                                                                                                                                                                                                                                                                                                                                                                                                                                                                                                                                                                                                                                           |          |          |          |          |          |          |          |          |          |          |          |          |          |          |          |          |           |           |           |           |           |           |           |           |           |           |           |           |           |           |           |           |           |           |           |           |           |           |           |           |           |           |           |           |           |
| H                                                                                                                                                                                                                                                                                                                                                                                                                                                                                                                                                                                                                                                                                                                                                                                                                                                                                                                                                                                                                                                                                                                                                                                                                                                                                                                                                                                                                             | -0.07826                                                                          | -0.90477                                                                            | 1.84133              |                |                                 |                                    |                                     |                              |                                      |                                               |         |         |          |   |         |         |         |   |         |          |         |   |          |          |         |   |         |          |         |   |         |         |         |   |          |         |         |   |         |         |         |   |          |         |         |   |          |         |         |   |          |         |          |   |          |          |          |   |          |          |          |   |          |          |          |   |          |         |          |   |         |          |          |                                                                                                                                                                                                                                                                                                                                                                                                                                                                                                                                                                                                                                                                                                                                                                                                                                                                                                                                                                                                                                                                                           |          |          |          |          |          |          |          |          |          |          |          |          |          |          |          |          |           |           |           |           |           |           |           |           |           |           |           |           |           |           |           |           |           |           |           |           |           |           |           |           |           |           |           |           |           |
| H                                                                                                                                                                                                                                                                                                                                                                                                                                                                                                                                                                                                                                                                                                                                                                                                                                                                                                                                                                                                                                                                                                                                                                                                                                                                                                                                                                                                                             | 1.45155                                                                           | -1.61605                                                                            | 1.12589              |                |                                 |                                    |                                     |                              |                                      |                                               |         |         |          |   |         |         |         |   |         |          |         |   |          |          |         |   |         |          |         |   |         |         |         |   |          |         |         |   |         |         |         |   |          |         |         |   |          |         |         |   |          |         |          |   |          |          |          |   |          |          |          |   |          |          |          |   |          |         |          |   |         |          |          |                                                                                                                                                                                                                                                                                                                                                                                                                                                                                                                                                                                                                                                                                                                                                                                                                                                                                                                                                                                                                                                                                           |          |          |          |          |          |          |          |          |          |          |          |          |          |          |          |          |           |           |           |           |           |           |           |           |           |           |           |           |           |           |           |           |           |           |           |           |           |           |           |           |           |           |           |           |           |
| H                                                                                                                                                                                                                                                                                                                                                                                                                                                                                                                                                                                                                                                                                                                                                                                                                                                                                                                                                                                                                                                                                                                                                                                                                                                                                                                                                                                                                             | 2.55325                                                                           | 0.78977                                                                             | 0.15229              |                |                                 |                                    |                                     |                              |                                      |                                               |         |         |          |   |         |         |         |   |         |          |         |   |          |          |         |   |         |          |         |   |         |         |         |   |          |         |         |   |         |         |         |   |          |         |         |   |          |         |         |   |          |         |          |   |          |          |          |   |          |          |          |   |          |          |          |   |          |         |          |   |         |          |          |                                                                                                                                                                                                                                                                                                                                                                                                                                                                                                                                                                                                                                                                                                                                                                                                                                                                                                                                                                                                                                                                                           |          |          |          |          |          |          |          |          |          |          |          |          |          |          |          |          |           |           |           |           |           |           |           |           |           |           |           |           |           |           |           |           |           |           |           |           |           |           |           |           |           |           |           |           |           |
| C                                                                                                                                                                                                                                                                                                                                                                                                                                                                                                                                                                                                                                                                                                                                                                                                                                                                                                                                                                                                                                                                                                                                                                                                                                                                                                                                                                                                                             | -0.21550                                                                          | 1.31928                                                                             | 0.14884              |                |                                 |                                    |                                     |                              |                                      |                                               |         |         |          |   |         |         |         |   |         |          |         |   |          |          |         |   |         |          |         |   |         |         |         |   |          |         |         |   |         |         |         |   |          |         |         |   |          |         |         |   |          |         |          |   |          |          |          |   |          |          |          |   |          |          |          |   |          |         |          |   |         |          |          |                                                                                                                                                                                                                                                                                                                                                                                                                                                                                                                                                                                                                                                                                                                                                                                                                                                                                                                                                                                                                                                                                           |          |          |          |          |          |          |          |          |          |          |          |          |          |          |          |          |           |           |           |           |           |           |           |           |           |           |           |           |           |           |           |           |           |           |           |           |           |           |           |           |           |           |           |           |           |
| H                                                                                                                                                                                                                                                                                                                                                                                                                                                                                                                                                                                                                                                                                                                                                                                                                                                                                                                                                                                                                                                                                                                                                                                                                                                                                                                                                                                                                             | 0.00395                                                                           | 1.98045                                                                             | 0.99447              |                |                                 |                                    |                                     |                              |                                      |                                               |         |         |          |   |         |         |         |   |         |          |         |   |          |          |         |   |         |          |         |   |         |         |         |   |          |         |         |   |         |         |         |   |          |         |         |   |          |         |         |   |          |         |          |   |          |          |          |   |          |          |          |   |          |          |          |   |          |         |          |   |         |          |          |                                                                                                                                                                                                                                                                                                                                                                                                                                                                                                                                                                                                                                                                                                                                                                                                                                                                                                                                                                                                                                                                                           |          |          |          |          |          |          |          |          |          |          |          |          |          |          |          |          |           |           |           |           |           |           |           |           |           |           |           |           |           |           |           |           |           |           |           |           |           |           |           |           |           |           |           |           |           |
| C                                                                                                                                                                                                                                                                                                                                                                                                                                                                                                                                                                                                                                                                                                                                                                                                                                                                                                                                                                                                                                                                                                                                                                                                                                                                                                                                                                                                                             | -1.60371                                                                          | 0.66350                                                                             | 0.25353              |                |                                 |                                    |                                     |                              |                                      |                                               |         |         |          |   |         |         |         |   |         |          |         |   |          |          |         |   |         |          |         |   |         |         |         |   |          |         |         |   |         |         |         |   |          |         |         |   |          |         |         |   |          |         |          |   |          |          |          |   |          |          |          |   |          |          |          |   |          |         |          |   |         |          |          |                                                                                                                                                                                                                                                                                                                                                                                                                                                                                                                                                                                                                                                                                                                                                                                                                                                                                                                                                                                                                                                                                           |          |          |          |          |          |          |          |          |          |          |          |          |          |          |          |          |           |           |           |           |           |           |           |           |           |           |           |           |           |           |           |           |           |           |           |           |           |           |           |           |           |           |           |           |           |
| H                                                                                                                                                                                                                                                                                                                                                                                                                                                                                                                                                                                                                                                                                                                                                                                                                                                                                                                                                                                                                                                                                                                                                                                                                                                                                                                                                                                                                             | -1.83307                                                                          | 0.43898                                                                             | 1.29968              |                |                                 |                                    |                                     |                              |                                      |                                               |         |         |          |   |         |         |         |   |         |          |         |   |          |          |         |   |         |          |         |   |         |         |         |   |          |         |         |   |         |         |         |   |          |         |         |   |          |         |         |   |          |         |          |   |          |          |          |   |          |          |          |   |          |          |          |   |          |         |          |   |         |          |          |                                                                                                                                                                                                                                                                                                                                                                                                                                                                                                                                                                                                                                                                                                                                                                                                                                                                                                                                                                                                                                                                                           |          |          |          |          |          |          |          |          |          |          |          |          |          |          |          |          |           |           |           |           |           |           |           |           |           |           |           |           |           |           |           |           |           |           |           |           |           |           |           |           |           |           |           |           |           |
| H                                                                                                                                                                                                                                                                                                                                                                                                                                                                                                                                                                                                                                                                                                                                                                                                                                                                                                                                                                                                                                                                                                                                                                                                                                                                                                                                                                                                                             | -2.40237                                                                          | 1.31192                                                                             | -0.11380             |                |                                 |                                    |                                     |                              |                                      |                                               |         |         |          |   |         |         |         |   |         |          |         |   |          |          |         |   |         |          |         |   |         |         |         |   |          |         |         |   |         |         |         |   |          |         |         |   |          |         |         |   |          |         |          |   |          |          |          |   |          |          |          |   |          |          |          |   |          |         |          |   |         |          |          |                                                                                                                                                                                                                                                                                                                                                                                                                                                                                                                                                                                                                                                                                                                                                                                                                                                                                                                                                                                                                                                                                           |          |          |          |          |          |          |          |          |          |          |          |          |          |          |          |          |           |           |           |           |           |           |           |           |           |           |           |           |           |           |           |           |           |           |           |           |           |           |           |           |           |           |           |           |           |
| C                                                                                                                                                                                                                                                                                                                                                                                                                                                                                                                                                                                                                                                                                                                                                                                                                                                                                                                                                                                                                                                                                                                                                                                                                                                                                                                                                                                                                             | -1.48666                                                                          | -0.64650                                                                            | -0.55506             |                |                                 |                                    |                                     |                              |                                      |                                               |         |         |          |   |         |         |         |   |         |          |         |   |          |          |         |   |         |          |         |   |         |         |         |   |          |         |         |   |         |         |         |   |          |         |         |   |          |         |         |   |          |         |          |   |          |          |          |   |          |          |          |   |          |          |          |   |          |         |          |   |         |          |          |                                                                                                                                                                                                                                                                                                                                                                                                                                                                                                                                                                                                                                                                                                                                                                                                                                                                                                                                                                                                                                                                                           |          |          |          |          |          |          |          |          |          |          |          |          |          |          |          |          |           |           |           |           |           |           |           |           |           |           |           |           |           |           |           |           |           |           |           |           |           |           |           |           |           |           |           |           |           |
| H                                                                                                                                                                                                                                                                                                                                                                                                                                                                                                                                                                                                                                                                                                                                                                                                                                                                                                                                                                                                                                                                                                                                                                                                                                                                                                                                                                                                                             | -2.18673                                                                          | -1.41105                                                                            | -0.20396             |                |                                 |                                    |                                     |                              |                                      |                                               |         |         |          |   |         |         |         |   |         |          |         |   |          |          |         |   |         |          |         |   |         |         |         |   |          |         |         |   |         |         |         |   |          |         |         |   |          |         |         |   |          |         |          |   |          |          |          |   |          |          |          |   |          |          |          |   |          |         |          |   |         |          |          |                                                                                                                                                                                                                                                                                                                                                                                                                                                                                                                                                                                                                                                                                                                                                                                                                                                                                                                                                                                                                                                                                           |          |          |          |          |          |          |          |          |          |          |          |          |          |          |          |          |           |           |           |           |           |           |           |           |           |           |           |           |           |           |           |           |           |           |           |           |           |           |           |           |           |           |           |           |           |
| H                                                                                                                                                                                                                                                                                                                                                                                                                                                                                                                                                                                                                                                                                                                                                                                                                                                                                                                                                                                                                                                                                                                                                                                                                                                                                                                                                                                                                             | -1.70299                                                                          | -0.45950                                                                            | -1.61272             |                |                                 |                                    |                                     |                              |                                      |                                               |         |         |          |   |         |         |         |   |         |          |         |   |          |          |         |   |         |          |         |   |         |         |         |   |          |         |         |   |         |         |         |   |          |         |         |   |          |         |         |   |          |         |          |   |          |          |          |   |          |          |          |   |          |          |          |   |          |         |          |   |         |          |          |                                                                                                                                                                                                                                                                                                                                                                                                                                                                                                                                                                                                                                                                                                                                                                                                                                                                                                                                                                                                                                                                                           |          |          |          |          |          |          |          |          |          |          |          |          |          |          |          |          |           |           |           |           |           |           |           |           |           |           |           |           |           |           |           |           |           |           |           |           |           |           |           |           |           |           |           |           |           |
| H                                                                                                                                                                                                                                                                                                                                                                                                                                                                                                                                                                                                                                                                                                                                                                                                                                                                                                                                                                                                                                                                                                                                                                                                                                                                                                                                                                                                                             | -0.12787                                                                          | 1.90700                                                                             | -0.77205             |                |                                 |                                    |                                     |                              |                                      |                                               |         |         |          |   |         |         |         |   |         |          |         |   |          |          |         |   |         |          |         |   |         |         |         |   |          |         |         |   |         |         |         |   |          |         |         |   |          |         |         |   |          |         |          |   |          |          |          |   |          |          |          |   |          |          |          |   |          |         |          |   |         |          |          |                                                                                                                                                                                                                                                                                                                                                                                                                                                                                                                                                                                                                                                                                                                                                                                                                                                                                                                                                                                                                                                                                           |          |          |          |          |          |          |          |          |          |          |          |          |          |          |          |          |           |           |           |           |           |           |           |           |           |           |           |           |           |           |           |           |           |           |           |           |           |           |           |           |           |           |           |           |           |
| H                                                                                                                                                                                                                                                                                                                                                                                                                                                                                                                                                                                                                                                                                                                                                                                                                                                                                                                                                                                                                                                                                                                                                                                                                                                                                                                                                                                                                             | 0.41549                                                                           | -1.73776                                                                            | -1.12287             |                |                                 |                                    |                                     |                              |                                      |                                               |         |         |          |   |         |         |         |   |         |          |         |   |          |          |         |   |         |          |         |   |         |         |         |   |          |         |         |   |         |         |         |   |          |         |         |   |          |         |         |   |          |         |          |   |          |          |          |   |          |          |          |   |          |          |          |   |          |         |          |   |         |          |          |                                                                                                                                                                                                                                                                                                                                                                                                                                                                                                                                                                                                                                                                                                                                                                                                                                                                                                                                                                                                                                                                                           |          |          |          |          |          |          |          |          |          |          |          |          |          |          |          |          |           |           |           |           |           |           |           |           |           |           |           |           |           |           |           |           |           |           |           |           |           |           |           |           |           |           |           |           |           |
| 218.7186                                                                                                                                                                                                                                                                                                                                                                                                                                                                                                                                                                                                                                                                                                                                                                                                                                                                                                                                                                                                                                                                                                                                                                                                                                                                                                                                                                                                                      | 249.7708                                                                          | 346.9290                                                                            |                      |                |                                 |                                    |                                     |                              |                                      |                                               |         |         |          |   |         |         |         |   |         |          |         |   |          |          |         |   |         |          |         |   |         |         |         |   |          |         |         |   |         |         |         |   |          |         |         |   |          |         |         |   |          |         |          |   |          |          |          |   |          |          |          |   |          |          |          |   |          |         |          |   |         |          |          |                                                                                                                                                                                                                                                                                                                                                                                                                                                                                                                                                                                                                                                                                                                                                                                                                                                                                                                                                                                                                                                                                           |          |          |          |          |          |          |          |          |          |          |          |          |          |          |          |          |           |           |           |           |           |           |           |           |           |           |           |           |           |           |           |           |           |           |           |           |           |           |           |           |           |           |           |           |           |
| 369.7460                                                                                                                                                                                                                                                                                                                                                                                                                                                                                                                                                                                                                                                                                                                                                                                                                                                                                                                                                                                                                                                                                                                                                                                                                                                                                                                                                                                                                      | 389.5136                                                                          | 457.7402                                                                            |                      |                |                                 |                                    |                                     |                              |                                      |                                               |         |         |          |   |         |         |         |   |         |          |         |   |          |          |         |   |         |          |         |   |         |         |         |   |          |         |         |   |         |         |         |   |          |         |         |   |          |         |         |   |          |         |          |   |          |          |          |   |          |          |          |   |          |          |          |   |          |         |          |   |         |          |          |                                                                                                                                                                                                                                                                                                                                                                                                                                                                                                                                                                                                                                                                                                                                                                                                                                                                                                                                                                                                                                                                                           |          |          |          |          |          |          |          |          |          |          |          |          |          |          |          |          |           |           |           |           |           |           |           |           |           |           |           |           |           |           |           |           |           |           |           |           |           |           |           |           |           |           |           |           |           |
| 550.7976                                                                                                                                                                                                                                                                                                                                                                                                                                                                                                                                                                                                                                                                                                                                                                                                                                                                                                                                                                                                                                                                                                                                                                                                                                                                                                                                                                                                                      | 618.5293                                                                          | 712.7037                                                                            |                      |                |                                 |                                    |                                     |                              |                                      |                                               |         |         |          |   |         |         |         |   |         |          |         |   |          |          |         |   |         |          |         |   |         |         |         |   |          |         |         |   |         |         |         |   |          |         |         |   |          |         |         |   |          |         |          |   |          |          |          |   |          |          |          |   |          |          |          |   |          |         |          |   |         |          |          |                                                                                                                                                                                                                                                                                                                                                                                                                                                                                                                                                                                                                                                                                                                                                                                                                                                                                                                                                                                                                                                                                           |          |          |          |          |          |          |          |          |          |          |          |          |          |          |          |          |           |           |           |           |           |           |           |           |           |           |           |           |           |           |           |           |           |           |           |           |           |           |           |           |           |           |           |           |           |
| 826.0150                                                                                                                                                                                                                                                                                                                                                                                                                                                                                                                                                                                                                                                                                                                                                                                                                                                                                                                                                                                                                                                                                                                                                                                                                                                                                                                                                                                                                      | 847.4259                                                                          | 898.7741                                                                            |                      |                |                                 |                                    |                                     |                              |                                      |                                               |         |         |          |   |         |         |         |   |         |          |         |   |          |          |         |   |         |          |         |   |         |         |         |   |          |         |         |   |         |         |         |   |          |         |         |   |          |         |         |   |          |         |          |   |          |          |          |   |          |          |          |   |          |          |          |   |          |         |          |   |         |          |          |                                                                                                                                                                                                                                                                                                                                                                                                                                                                                                                                                                                                                                                                                                                                                                                                                                                                                                                                                                                                                                                                                           |          |          |          |          |          |          |          |          |          |          |          |          |          |          |          |          |           |           |           |           |           |           |           |           |           |           |           |           |           |           |           |           |           |           |           |           |           |           |           |           |           |           |           |           |           |
| 916.2375                                                                                                                                                                                                                                                                                                                                                                                                                                                                                                                                                                                                                                                                                                                                                                                                                                                                                                                                                                                                                                                                                                                                                                                                                                                                                                                                                                                                                      | 921.1445                                                                          | 967.1094                                                                            |                      |                |                                 |                                    |                                     |                              |                                      |                                               |         |         |          |   |         |         |         |   |         |          |         |   |          |          |         |   |         |          |         |   |         |         |         |   |          |         |         |   |         |         |         |   |          |         |         |   |          |         |         |   |          |         |          |   |          |          |          |   |          |          |          |   |          |          |          |   |          |         |          |   |         |          |          |                                                                                                                                                                                                                                                                                                                                                                                                                                                                                                                                                                                                                                                                                                                                                                                                                                                                                                                                                                                                                                                                                           |          |          |          |          |          |          |          |          |          |          |          |          |          |          |          |          |           |           |           |           |           |           |           |           |           |           |           |           |           |           |           |           |           |           |           |           |           |           |           |           |           |           |           |           |           |
| 987.7957                                                                                                                                                                                                                                                                                                                                                                                                                                                                                                                                                                                                                                                                                                                                                                                                                                                                                                                                                                                                                                                                                                                                                                                                                                                                                                                                                                                                                      | 1012.3285                                                                         | 1039.2903                                                                           |                      |                |                                 |                                    |                                     |                              |                                      |                                               |         |         |          |   |         |         |         |   |         |          |         |   |          |          |         |   |         |          |         |   |         |         |         |   |          |         |         |   |         |         |         |   |          |         |         |   |          |         |         |   |          |         |          |   |          |          |          |   |          |          |          |   |          |          |          |   |          |         |          |   |         |          |          |                                                                                                                                                                                                                                                                                                                                                                                                                                                                                                                                                                                                                                                                                                                                                                                                                                                                                                                                                                                                                                                                                           |          |          |          |          |          |          |          |          |          |          |          |          |          |          |          |          |           |           |           |           |           |           |           |           |           |           |           |           |           |           |           |           |           |           |           |           |           |           |           |           |           |           |           |           |           |
| 1065.7574                                                                                                                                                                                                                                                                                                                                                                                                                                                                                                                                                                                                                                                                                                                                                                                                                                                                                                                                                                                                                                                                                                                                                                                                                                                                                                                                                                                                                     | 1099.6435                                                                         | 1125.4589                                                                           |                      |                |                                 |                                    |                                     |                              |                                      |                                               |         |         |          |   |         |         |         |   |         |          |         |   |          |          |         |   |         |          |         |   |         |         |         |   |          |         |         |   |         |         |         |   |          |         |         |   |          |         |         |   |          |         |          |   |          |          |          |   |          |          |          |   |          |          |          |   |          |         |          |   |         |          |          |                                                                                                                                                                                                                                                                                                                                                                                                                                                                                                                                                                                                                                                                                                                                                                                                                                                                                                                                                                                                                                                                                           |          |          |          |          |          |          |          |          |          |          |          |          |          |          |          |          |           |           |           |           |           |           |           |           |           |           |           |           |           |           |           |           |           |           |           |           |           |           |           |           |           |           |           |           |           |
| 1174.1473                                                                                                                                                                                                                                                                                                                                                                                                                                                                                                                                                                                                                                                                                                                                                                                                                                                                                                                                                                                                                                                                                                                                                                                                                                                                                                                                                                                                                     | 1211.8734                                                                         | 1253.4906                                                                           |                      |                |                                 |                                    |                                     |                              |                                      |                                               |         |         |          |   |         |         |         |   |         |          |         |   |          |          |         |   |         |          |         |   |         |         |         |   |          |         |         |   |         |         |         |   |          |         |         |   |          |         |         |   |          |         |          |   |          |          |          |   |          |          |          |   |          |          |          |   |          |         |          |   |         |          |          |                                                                                                                                                                                                                                                                                                                                                                                                                                                                                                                                                                                                                                                                                                                                                                                                                                                                                                                                                                                                                                                                                           |          |          |          |          |          |          |          |          |          |          |          |          |          |          |          |          |           |           |           |           |           |           |           |           |           |           |           |           |           |           |           |           |           |           |           |           |           |           |           |           |           |           |           |           |           |
| 1274.9256                                                                                                                                                                                                                                                                                                                                                                                                                                                                                                                                                                                                                                                                                                                                                                                                                                                                                                                                                                                                                                                                                                                                                                                                                                                                                                                                                                                                                     | 1290.3576                                                                         | 1330.2710                                                                           |                      |                |                                 |                                    |                                     |                              |                                      |                                               |         |         |          |   |         |         |         |   |         |          |         |   |          |          |         |   |         |          |         |   |         |         |         |   |          |         |         |   |         |         |         |   |          |         |         |   |          |         |         |   |          |         |          |   |          |          |          |   |          |          |          |   |          |          |          |   |          |         |          |   |         |          |          |                                                                                                                                                                                                                                                                                                                                                                                                                                                                                                                                                                                                                                                                                                                                                                                                                                                                                                                                                                                                                                                                                           |          |          |          |          |          |          |          |          |          |          |          |          |          |          |          |          |           |           |           |           |           |           |           |           |           |           |           |           |           |           |           |           |           |           |           |           |           |           |           |           |           |           |           |           |           |
| 1349.9471                                                                                                                                                                                                                                                                                                                                                                                                                                                                                                                                                                                                                                                                                                                                                                                                                                                                                                                                                                                                                                                                                                                                                                                                                                                                                                                                                                                                                     | 1361.9481                                                                         | 1370.9121                                                                           |                      |                |                                 |                                    |                                     |                              |                                      |                                               |         |         |          |   |         |         |         |   |         |          |         |   |          |          |         |   |         |          |         |   |         |         |         |   |          |         |         |   |         |         |         |   |          |         |         |   |          |         |         |   |          |         |          |   |          |          |          |   |          |          |          |   |          |          |          |   |          |         |          |   |         |          |          |                                                                                                                                                                                                                                                                                                                                                                                                                                                                                                                                                                                                                                                                                                                                                                                                                                                                                                                                                                                                                                                                                           |          |          |          |          |          |          |          |          |          |          |          |          |          |          |          |          |           |           |           |           |           |           |           |           |           |           |           |           |           |           |           |           |           |           |           |           |           |           |           |           |           |           |           |           |           |
| 1425.9593                                                                                                                                                                                                                                                                                                                                                                                                                                                                                                                                                                                                                                                                                                                                                                                                                                                                                                                                                                                                                                                                                                                                                                                                                                                                                                                                                                                                                     | 1501.3010                                                                         | 1506.3580                                                                           |                      |                |                                 |                                    |                                     |                              |                                      |                                               |         |         |          |   |         |         |         |   |         |          |         |   |          |          |         |   |         |          |         |   |         |         |         |   |          |         |         |   |         |         |         |   |          |         |         |   |          |         |         |   |          |         |          |   |          |          |          |   |          |          |          |   |          |          |          |   |          |         |          |   |         |          |          |                                                                                                                                                                                                                                                                                                                                                                                                                                                                                                                                                                                                                                                                                                                                                                                                                                                                                                                                                                                                                                                                                           |          |          |          |          |          |          |          |          |          |          |          |          |          |          |          |          |           |           |           |           |           |           |           |           |           |           |           |           |           |           |           |           |           |           |           |           |           |           |           |           |           |           |           |           |           |
| 1516.1429                                                                                                                                                                                                                                                                                                                                                                                                                                                                                                                                                                                                                                                                                                                                                                                                                                                                                                                                                                                                                                                                                                                                                                                                                                                                                                                                                                                                                     | 1536.0356                                                                         | 3069.6620                                                                           |                      |                |                                 |                                    |                                     |                              |                                      |                                               |         |         |          |   |         |         |         |   |         |          |         |   |          |          |         |   |         |          |         |   |         |         |         |   |          |         |         |   |         |         |         |   |          |         |         |   |          |         |         |   |          |         |          |   |          |          |          |   |          |          |          |   |          |          |          |   |          |         |          |   |         |          |          |                                                                                                                                                                                                                                                                                                                                                                                                                                                                                                                                                                                                                                                                                                                                                                                                                                                                                                                                                                                                                                                                                           |          |          |          |          |          |          |          |          |          |          |          |          |          |          |          |          |           |           |           |           |           |           |           |           |           |           |           |           |           |           |           |           |           |           |           |           |           |           |           |           |           |           |           |           |           |
| 3076.7137                                                                                                                                                                                                                                                                                                                                                                                                                                                                                                                                                                                                                                                                                                                                                                                                                                                                                                                                                                                                                                                                                                                                                                                                                                                                                                                                                                                                                     | 3096.2241                                                                         | 3117.9686                                                                           |                      |                |                                 |                                    |                                     |                              |                                      |                                               |         |         |          |   |         |         |         |   |         |          |         |   |          |          |         |   |         |          |         |   |         |         |         |   |          |         |         |   |         |         |         |   |          |         |         |   |          |         |         |   |          |         |          |   |          |          |          |   |          |          |          |   |          |          |          |   |          |         |          |   |         |          |          |                                                                                                                                                                                                                                                                                                                                                                                                                                                                                                                                                                                                                                                                                                                                                                                                                                                                                                                                                                                                                                                                                           |          |          |          |          |          |          |          |          |          |          |          |          |          |          |          |          |           |           |           |           |           |           |           |           |           |           |           |           |           |           |           |           |           |           |           |           |           |           |           |           |           |           |           |           |           |
| 3122.9285                                                                                                                                                                                                                                                                                                                                                                                                                                                                                                                                                                                                                                                                                                                                                                                                                                                                                                                                                                                                                                                                                                                                                                                                                                                                                                                                                                                                                     | 3145.5093                                                                         | 3150.0545                                                                           |                      |                |                                 |                                    |                                     |                              |                                      |                                               |         |         |          |   |         |         |         |   |         |          |         |   |          |          |         |   |         |          |         |   |         |         |         |   |          |         |         |   |         |         |         |   |          |         |         |   |          |         |         |   |          |         |          |   |          |          |          |   |          |          |          |   |          |          |          |   |          |         |          |   |         |          |          |                                                                                                                                                                                                                                                                                                                                                                                                                                                                                                                                                                                                                                                                                                                                                                                                                                                                                                                                                                                                                                                                                           |          |          |          |          |          |          |          |          |          |          |          |          |          |          |          |          |           |           |           |           |           |           |           |           |           |           |           |           |           |           |           |           |           |           |           |           |           |           |           |           |           |           |           |           |           |
| 3221.3029                                                                                                                                                                                                                                                                                                                                                                                                                                                                                                                                                                                                                                                                                                                                                                                                                                                                                                                                                                                                                                                                                                                                                                                                                                                                                                                                                                                                                     | 3241.3378                                                                         | 3880.0908                                                                           |                      |                |                                 |                                    |                                     |                              |                                      |                                               |         |         |          |   |         |         |         |   |         |          |         |   |          |          |         |   |         |          |         |   |         |         |         |   |          |         |         |   |         |         |         |   |          |         |         |   |          |         |         |   |          |         |          |   |          |          |          |   |          |          |          |   |          |          |          |   |          |         |          |   |         |          |          |                                                                                                                                                                                                                                                                                                                                                                                                                                                                                                                                                                                                                                                                                                                                                                                                                                                                                                                                                                                                                                                                                           |          |          |          |          |          |          |          |          |          |          |          |          |          |          |          |          |           |           |           |           |           |           |           |           |           |           |           |           |           |           |           |           |           |           |           |           |           |           |           |           |           |           |           |           |           |
| <p style="text-align: center;"><b><u>Statistical Thermodynamic Analysis</u></b></p> <table border="0"> <tr> <td>Temperature=298.15 K</td> <td>Pressure=1 atm</td> </tr> <tr> <td>Zero-point correction= 0.152288</td> <td>Electronic Energy = -309.718741856</td> </tr> <tr> <td>Internal Energy (E)= -309.560224856</td> <td>Enthalpy (H)= -309.559280856</td> </tr> <tr> <td>Gibbs Free Energy (G)=-309.595983856</td> <td>Gibbs Free Energy of Solvation=-309.599133984</td> </tr> </table>                                                                                                                                                                                                                                                                                                                                                                                                                                                                                                                                                                                                                                                                                                                                                                                                                                                                                                                                |                                                                                   |                                                                                     | Temperature=298.15 K | Pressure=1 atm | Zero-point correction= 0.152288 | Electronic Energy = -309.718741856 | Internal Energy (E)= -309.560224856 | Enthalpy (H)= -309.559280856 | Gibbs Free Energy (G)=-309.595983856 | Gibbs Free Energy of Solvation=-309.599133984 |         |         |          |   |         |         |         |   |         |          |         |   |          |          |         |   |         |          |         |   |         |         |         |   |          |         |         |   |         |         |         |   |          |         |         |   |          |         |         |   |          |         |          |   |          |          |          |   |          |          |          |   |          |          |          |   |          |         |          |   |         |          |          |                                                                                                                                                                                                                                                                                                                                                                                                                                                                                                                                                                                                                                                                                                                                                                                                                                                                                                                                                                                                                                                                                           |          |          |          |          |          |          |          |          |          |          |          |          |          |          |          |          |           |           |           |           |           |           |           |           |           |           |           |           |           |           |           |           |           |           |           |           |           |           |           |           |           |           |           |           |           |
| Temperature=298.15 K                                                                                                                                                                                                                                                                                                                                                                                                                                                                                                                                                                                                                                                                                                                                                                                                                                                                                                                                                                                                                                                                                                                                                                                                                                                                                                                                                                                                          | Pressure=1 atm                                                                    |                                                                                     |                      |                |                                 |                                    |                                     |                              |                                      |                                               |         |         |          |   |         |         |         |   |         |          |         |   |          |          |         |   |         |          |         |   |         |         |         |   |          |         |         |   |         |         |         |   |          |         |         |   |          |         |         |   |          |         |          |   |          |          |          |   |          |          |          |   |          |          |          |   |          |         |          |   |         |          |          |                                                                                                                                                                                                                                                                                                                                                                                                                                                                                                                                                                                                                                                                                                                                                                                                                                                                                                                                                                                                                                                                                           |          |          |          |          |          |          |          |          |          |          |          |          |          |          |          |          |           |           |           |           |           |           |           |           |           |           |           |           |           |           |           |           |           |           |           |           |           |           |           |           |           |           |           |           |           |
| Zero-point correction= 0.152288                                                                                                                                                                                                                                                                                                                                                                                                                                                                                                                                                                                                                                                                                                                                                                                                                                                                                                                                                                                                                                                                                                                                                                                                                                                                                                                                                                                               | Electronic Energy = -309.718741856                                                |                                                                                     |                      |                |                                 |                                    |                                     |                              |                                      |                                               |         |         |          |   |         |         |         |   |         |          |         |   |          |          |         |   |         |          |         |   |         |         |         |   |          |         |         |   |         |         |         |   |          |         |         |   |          |         |         |   |          |         |          |   |          |          |          |   |          |          |          |   |          |          |          |   |          |         |          |   |         |          |          |                                                                                                                                                                                                                                                                                                                                                                                                                                                                                                                                                                                                                                                                                                                                                                                                                                                                                                                                                                                                                                                                                           |          |          |          |          |          |          |          |          |          |          |          |          |          |          |          |          |           |           |           |           |           |           |           |           |           |           |           |           |           |           |           |           |           |           |           |           |           |           |           |           |           |           |           |           |           |
| Internal Energy (E)= -309.560224856                                                                                                                                                                                                                                                                                                                                                                                                                                                                                                                                                                                                                                                                                                                                                                                                                                                                                                                                                                                                                                                                                                                                                                                                                                                                                                                                                                                           | Enthalpy (H)= -309.559280856                                                      |                                                                                     |                      |                |                                 |                                    |                                     |                              |                                      |                                               |         |         |          |   |         |         |         |   |         |          |         |   |          |          |         |   |         |          |         |   |         |         |         |   |          |         |         |   |         |         |         |   |          |         |         |   |          |         |         |   |          |         |          |   |          |          |          |   |          |          |          |   |          |          |          |   |          |         |          |   |         |          |          |                                                                                                                                                                                                                                                                                                                                                                                                                                                                                                                                                                                                                                                                                                                                                                                                                                                                                                                                                                                                                                                                                           |          |          |          |          |          |          |          |          |          |          |          |          |          |          |          |          |           |           |           |           |           |           |           |           |           |           |           |           |           |           |           |           |           |           |           |           |           |           |           |           |           |           |           |           |           |
| Gibbs Free Energy (G)=-309.595983856                                                                                                                                                                                                                                                                                                                                                                                                                                                                                                                                                                                                                                                                                                                                                                                                                                                                                                                                                                                                                                                                                                                                                                                                                                                                                                                                                                                          | Gibbs Free Energy of Solvation=-309.599133984                                     |                                                                                     |                      |                |                                 |                                    |                                     |                              |                                      |                                               |         |         |          |   |         |         |         |   |         |          |         |   |          |          |         |   |         |          |         |   |         |         |         |   |          |         |         |   |         |         |         |   |          |         |         |   |          |         |         |   |          |         |          |   |          |          |          |   |          |          |          |   |          |          |          |   |          |         |          |   |         |          |          |                                                                                                                                                                                                                                                                                                                                                                                                                                                                                                                                                                                                                                                                                                                                                                                                                                                                                                                                                                                                                                                                                           |          |          |          |          |          |          |          |          |          |          |          |          |          |          |          |          |           |           |           |           |           |           |           |           |           |           |           |           |           |           |           |           |           |           |           |           |           |           |           |           |           |           |           |           |           |

| St.Pt.                                           | General Structure | Ball & Stick model        |                                              |           |           |           |
|--------------------------------------------------|-------------------|---------------------------|----------------------------------------------|-----------|-----------|-----------|
| b                                                |                   |                           |                                              |           |           |           |
| <b><u>Cartesian co-ordinate</u></b>              |                   | <b><u>Frequencies</u></b> |                                              |           |           |           |
| -----<br>Atoms                                   | X                 | Y                         | Z                                            |           |           |           |
| -----                                            |                   |                           |                                              |           |           |           |
| C                                                | -3.17738          | -1.54894                  | -0.67531                                     | 2.9387    | 50.0966   | 80.5572   |
| C                                                | -3.15374          | -1.54304                  | 0.72645                                      | 87.9864   | 89.3817   | 109.7068  |
| Pt                                               | -1.80036          | -0.07912                  | -0.00347                                     | 124.2386  | 128.6058  | 177.8734  |
| Cl                                               | -3.49559          | 1.48916                   | 0.02492                                      | 178.2620  | 192.6239  | 195.6003  |
| Cl                                               | 0.04341           | -1.67277                  | -0.03359                                     | 237.5322  | 257.6038  | 276.6461  |
| H                                                | -2.57032          | -2.27967                  | 1.27091                                      | 281.8348  | 354.5421  | 356.1301  |
| H                                                | -3.92403          | -1.01455                  | 1.27868                                      | 404.2840  | 405.5701  | 507.5857  |
| H                                                | -3.96599          | -1.02532                  | -1.20589                                     | 507.6732  | 773.6047  | 773.9266  |
| H                                                | -2.61278          | -2.29059                  | -1.23260                                     | 847.8907  | 847.9440  | 1024.5210 |
| Pt                                               | 1.80031           | 0.07911                   | -0.00347                                     | 1024.7903 | 1076.4852 | 1076.6357 |
| Cl                                               | 3.49562           | -1.48913                  | 0.02495                                      | 1080.1263 | 1080.2373 | 1229.9457 |
| Cl                                               | -0.04342          | 1.67289                   | -0.03354                                     | 1230.0007 | 1288.7163 | 1289.5402 |
| H                                                | 3.92408           | 1.01430                   | 1.27865                                      | 1479.3815 | 1479.4633 | 1580.3803 |
| C                                                | 3.15389           | 1.54294                   | 0.72641                                      | 1581.5728 | 3178.0579 | 3178.0976 |
| C                                                | 3.17757           | 1.54877                   | -0.67535                                     | 3183.1235 | 3183.1740 | 3278.3804 |
| H                                                | 2.57058           | 2.27970                   | 1.27081                                      | 3278.3886 | 3293.8032 | 3293.8111 |
| H                                                | 2.61303           | 2.29044                   | -1.23268                                     |           |           |           |
| H                                                | 3.96610           | 1.02499                   | -1.20588                                     |           |           |           |
| <b><u>Statistical Thermodynamic Analysis</u></b> |                   |                           |                                              |           |           |           |
| Temperature=298.15 K                             |                   |                           | Pressure=1 atm                               |           |           |           |
| Zero-point correction= 0.117643                  |                   |                           | Electronic Energy = -2235.96844340           |           |           |           |
| Internal Energy (E)= -2235.8353104               |                   |                           | Enthalpy (H)= -2235.8343664                  |           |           |           |
| Gibbs Free Energy (G)=-2235.8994584              |                   |                           | Gibbs Free Energy of Solvation=-2235.9576833 |           |           |           |

| St.Pt.                                           | General Structure                                                                 | Ball & Stick model                                                                 |                                               |           |           |           |
|--------------------------------------------------|-----------------------------------------------------------------------------------|------------------------------------------------------------------------------------|-----------------------------------------------|-----------|-----------|-----------|
| c                                                | 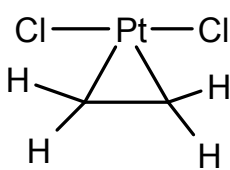 |  |                                               |           |           |           |
| <b><u>Cartesian co-ordinate</u></b>              |                                                                                   | <b><u>Frequencies</u></b>                                                          |                                               |           |           |           |
| -----<br>Atoms                                   | X                                                                                 | Y                                                                                  | Z                                             | 115.0144  | 119.7496  | 137.1477  |
| -----                                            | -----                                                                             | -----                                                                              | -----                                         | 141.5947  | 338.9983  | 353.7419  |
| Pt                                               | -0.00010                                                                          | -0.20997                                                                           | -0.00001                                      | 458.4094  | 524.4425  | 811.5035  |
| Cl                                               | 2.31760                                                                           | -0.35512                                                                           | 0.00004                                       | 831.1351  | 978.9657  | 1095.1484 |
| Cl                                               | -2.31780                                                                          | -0.35459                                                                           | 0.00001                                       | 1101.7933 | 1223.8808 | 1232.6997 |
| H                                                | 0.92902                                                                           | 1.90430                                                                            | 1.25018                                       | 1464.1366 | 1545.3096 | 3171.1591 |
| C                                                | 0.00057                                                                           | 1.73535                                                                            | 0.71254                                       | 3171.6501 | 3269.9209 | 3283.7780 |
| C                                                | 0.00077                                                                           | 1.73536                                                                            | -0.71253                                      |           |           |           |
| H                                                | -0.92785                                                                          | 1.90503                                                                            | 1.24999                                       |           |           |           |
| H                                                | -0.92750                                                                          | 1.90508                                                                            | -1.25024                                      |           |           |           |
| H                                                | 0.92937                                                                           | 1.90432                                                                            | -1.24990                                      |           |           |           |
| Pt                                               | 1.80031                                                                           | 0.07911                                                                            | -0.00347                                      |           |           |           |
| Cl                                               | 3.49562                                                                           | -1.48913                                                                           | 0.02495                                       |           |           |           |
| Cl                                               | -0.04342                                                                          | 1.67289                                                                            | -0.03354                                      |           |           |           |
| H                                                | 3.92408                                                                           | 1.01430                                                                            | 1.27865                                       |           |           |           |
| C                                                | 3.15389                                                                           | 1.54294                                                                            | 0.72641                                       |           |           |           |
| C                                                | 3.17757                                                                           | 1.54877                                                                            | -0.67535                                      |           |           |           |
| H                                                | 2.57058                                                                           | 2.27970                                                                            | 1.27081                                       |           |           |           |
| H                                                | 2.61303                                                                           | 2.29044                                                                            | -1.23268                                      |           |           |           |
| H                                                | 3.96610                                                                           | 1.02499                                                                            | -1.20588                                      |           |           |           |
| <b><u>Statistical Thermodynamic Analysis</u></b> |                                                                                   |                                                                                    |                                               |           |           |           |
| Temperature=298.15 K                             |                                                                                   |                                                                                    | Pressure=1 atm                                |           |           |           |
| Zero-point correction= 0.057798                  |                                                                                   |                                                                                    | Electronic Energy = -1117.94345067            |           |           |           |
| Internal Energy (E)= -1117.87862367              |                                                                                   |                                                                                    | Enthalpy (H)= -1117.87767967                  |           |           |           |
| Gibbs Free Energy (G)=-1117.91936467             |                                                                                   |                                                                                    | Gibbs Free Energy of Solvation=-1117.96719306 |           |           |           |

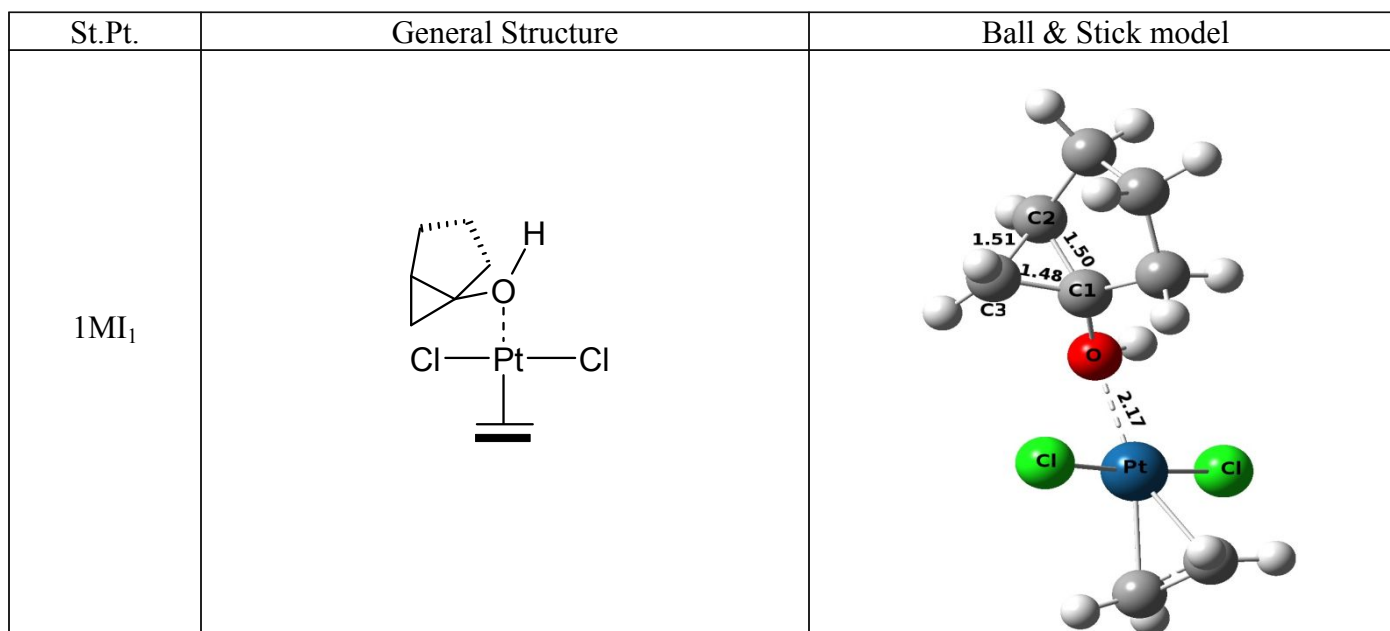

**Cartesian co-ordinate**

**Frequencies**

| Atoms | X        | Y        | Z        |
|-------|----------|----------|----------|
| C     | 2.57498  | -0.54376 | 1.21860  |
| C     | 3.00161  | -0.65068 | -0.11225 |
| Pt    | 0.99056  | -0.01140 | -0.07147 |
| Cl    | 1.57578  | 2.27367  | -0.00114 |
| Cl    | 0.26419  | -2.24293 | -0.13946 |
| H     | 3.01949  | -1.62023 | -0.59971 |
| H     | 3.57917  | 0.14949  | -0.56467 |
| H     | 2.82176  | 0.33875  | 1.80011  |
| H     | 2.26235  | -1.43068 | 1.76051  |
| C     | -3.45087 | 0.49528  | -0.93147 |
| O     | -0.93170 | 0.75119  | -0.74750 |
| C     | -2.14053 | 0.18566  | -0.26675 |
| C     | -2.76746 | -0.83964 | -1.13556 |
| H     | -3.16191 | -1.74273 | -0.68123 |
| H     | -2.28418 | -0.98417 | -2.09497 |
| H     | -0.89346 | 1.70679  | -0.56920 |
| C     | -2.33305 | 0.11149  | 1.23013  |
| H     | -1.73176 | -0.68185 | 1.68553  |
| C     | -3.84963 | -0.10689 | 1.38511  |
| H     | -4.07043 | -1.17749 | 1.35909  |
| H     | -4.22989 | 0.27405  | 2.33476  |
| C     | -4.49416 | 0.59628  | 0.16889  |
| H     | -5.45254 | 0.14605  | -0.10544 |
| H     | -4.67721 | 1.65316  | 0.39216  |
| H     | -2.02820 | 1.07099  | 1.66937  |
| H     | -3.48827 | 1.16858  | -1.78134 |

|           |           |           |
|-----------|-----------|-----------|
| 33.1705   | 54.9865   | 69.8338   |
| 93.6662   | 122.2538  | 132.0655  |
| 145.8172  | 171.2414  | 175.9543  |
| 193.2525  | 248.7029  | 294.6753  |
| 320.2045  | 333.0587  | 368.4720  |
| 418.3651  | 442.3730  | 493.0247  |
| 524.3130  | 569.1475  | 617.8736  |
| 685.2195  | 721.3625  | 790.1960  |
| 826.2130  | 844.2475  | 851.2342  |
| 895.9004  | 921.7726  | 953.4159  |
| 980.8607  | 997.6327  | 1017.1963 |
| 1025.8622 | 1061.5291 | 1075.1577 |
| 1076.1240 | 1092.0529 | 1102.4798 |
| 1123.2788 | 1177.7871 | 1212.8240 |
| 1233.9180 | 1255.2608 | 1269.5880 |
| 1287.5674 | 1289.2649 | 1321.5687 |
| 1348.0321 | 1356.3964 | 1382.9585 |
| 1426.6788 | 1471.3397 | 1502.1693 |
| 1505.4526 | 1517.7775 | 1536.2800 |
| 1576.2698 | 3058.1814 | 3078.7949 |
| 3102.7128 | 3127.9760 | 3130.3593 |
| 3165.9540 | 3175.8206 | 3177.3053 |
| 3189.9803 | 3210.4364 | 3270.1737 |
| 3275.8864 | 3295.1308 | 3754.6798 |

**Statistical Thermodynamic Analysis**

|                                      |                                               |
|--------------------------------------|-----------------------------------------------|
| Temperature=298.15 K                 | Pressure=1 atm                                |
| Zero-point correction= 0.213120      | Electronic Energy = -1427.71546047            |
| Internal Energy (E)= -1427.48799047  | Enthalpy (H)= -1427.48704647                  |
| Gibbs Free Energy (G)=-1427.54582647 | Gibbs Free Energy of Solvation=-1427.57830534 |

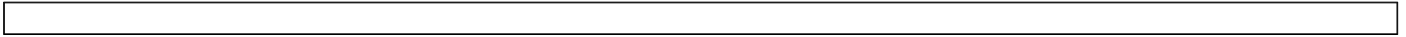

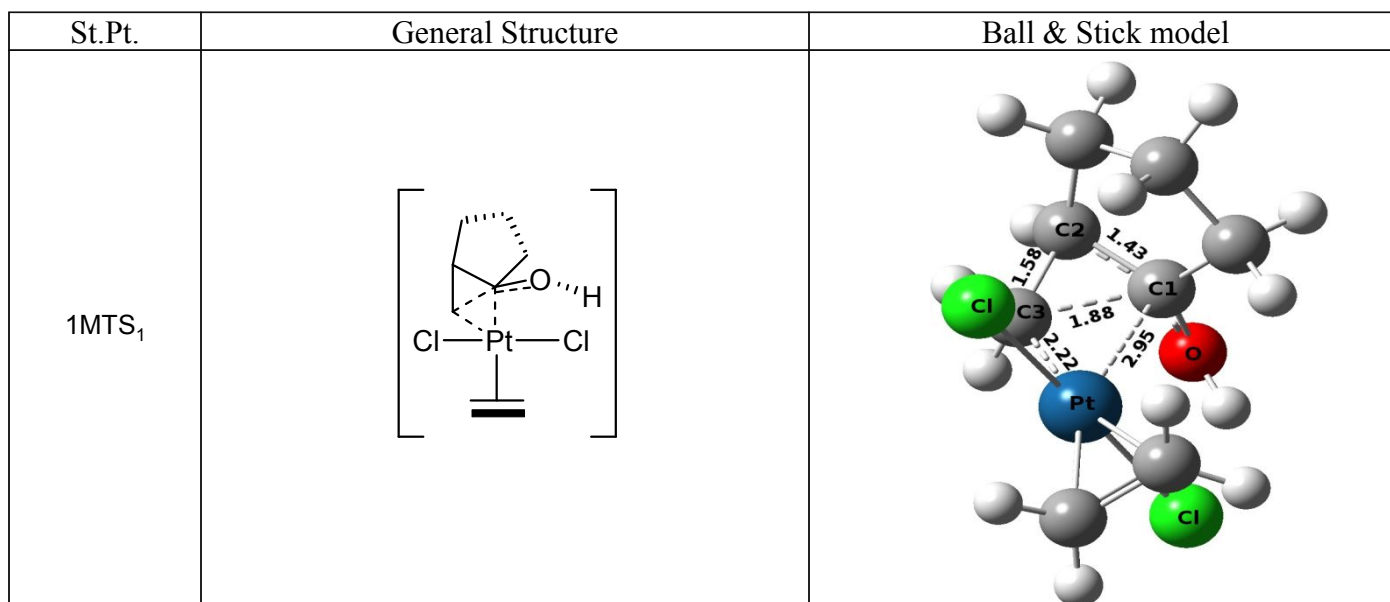

**Cartesian co-ordinate**

| Atoms | X        | Y        | Z        |
|-------|----------|----------|----------|
| C     | 2.85892  | -0.16356 | 0.09587  |
| C     | 2.27494  | -0.19743 | 1.35235  |
| Pt    | 0.68675  | -0.04666 | -0.15229 |
| Cl    | 0.64416  | -2.40995 | -0.25683 |
| Cl    | 0.89403  | 2.33439  | 0.01698  |
| H     | 2.20609  | 0.70798  | 1.94682  |
| H     | 2.10566  | -1.14657 | 1.85018  |
| H     | 3.15000  | -1.08518 | -0.39686 |
| H     | 3.24790  | 0.76791  | -0.30233 |
| C     | -2.75752 | 0.02055  | -0.83771 |
| O     | -2.01326 | 2.19035  | -0.19026 |
| C     | -2.10205 | 0.90635  | 0.08116  |
| C     | -1.23963 | -0.07260 | -1.27356 |
| H     | -1.08580 | -1.11883 | -1.53778 |
| H     | -1.07373 | 0.63913  | -2.07870 |
| H     | -1.17929 | 2.56192  | 0.17781  |
| C     | -2.04061 | 0.31705  | 1.46942  |
| H     | -1.10284 | 0.50393  | 1.99674  |
| C     | -2.38943 | -1.16328 | 1.25365  |
| H     | -1.47728 | -1.74622 | 1.11165  |
| H     | -2.92800 | -1.58324 | 2.10468  |
| C     | -3.23871 | -1.18307 | -0.03956 |
| H     | -3.13033 | -2.12022 | -0.59116 |
| H     | -4.30073 | -1.04491 | 0.18968  |
| H     | -2.84405 | 0.83813  | 2.00915  |
| H     | -3.39269 | 0.44293  | -1.61122 |

**Frequencies**

|           |           |           |
|-----------|-----------|-----------|
| -197.2068 | 47.4892   | 70.7521   |
| 102.6045  | 122.0883  | 136.7096  |
| 168.5095  | 182.1534  | 191.6588  |
| 206.1806  | 244.2241  | 287.5761  |
| 295.9921  | 306.9692  | 331.1574  |
| 363.0522  | 378.2574  | 419.8832  |
| 443.9840  | 472.5042  | 584.7263  |
| 646.9451  | 663.1708  | 696.4807  |
| 721.9115  | 786.1640  | 840.8074  |
| 848.9823  | 893.8485  | 900.5265  |
| 941.4314  | 958.7791  | 1030.1913 |
| 1044.4389 | 1048.7860 | 1058.8809 |
| 1062.9560 | 1080.6073 | 1130.9227 |
| 1143.7660 | 1198.1217 | 1223.8084 |
| 1228.5521 | 1235.7291 | 1262.5282 |
| 1312.7331 | 1315.5092 | 1339.0258 |
| 1345.6958 | 1365.2800 | 1408.7100 |
| 1450.3822 | 1468.8710 | 1483.1938 |
| 1499.3987 | 1524.3065 | 1592.8463 |
| 1598.0878 | 3067.1709 | 3083.9374 |
| 3112.5510 | 3117.7416 | 3141.6160 |
| 3148.3555 | 3173.9802 | 3182.8730 |
| 3190.7446 | 3191.3843 | 3233.1852 |
| 3280.2584 | 3297.7431 | 3485.6603 |

**Statistical Thermodynamic Analysis**

|                                     |                                               |
|-------------------------------------|-----------------------------------------------|
| Temperature=298.15 K                | Pressure=1 atm                                |
| Zero-point correction= 0.210539     | Electronic Energy = -1427.68971230            |
| Internal Energy (E)= -1427.4652093  | Enthalpy (H)= -1427.4642653                   |
| Gibbs Free Energy (G)=-1427.5208403 | Gibbs Free Energy of Solvation=-1427.54804589 |

| St.Pt.                                           | General Structure                                                                                                                    | Ball & Stick model                                                                 |                                               |           |           |           |
|--------------------------------------------------|--------------------------------------------------------------------------------------------------------------------------------------|------------------------------------------------------------------------------------|-----------------------------------------------|-----------|-----------|-----------|
| 1MI <sub>2</sub>                                 | 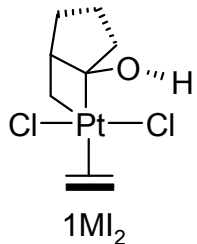 <p style="text-align: center;">1MI<sub>2</sub></p> |  |                                               |           |           |           |
| <b><u>Cartesian co-ordinate</u></b>              |                                                                                                                                      | <b><u>Frequencies</u></b>                                                          |                                               |           |           |           |
| -----<br>Atoms                                   | X                                                                                                                                    | Y                                                                                  | Z                                             |           |           |           |
| -----                                            |                                                                                                                                      |                                                                                    |                                               |           |           |           |
| C                                                | -2.71249                                                                                                                             | 0.96958                                                                            | 0.74923                                       | 69.4846   | 77.0695   | 94.6644   |
| C                                                | -1.95118                                                                                                                             | 0.62268                                                                            | 1.80315                                       | 105.1562  | 123.2676  | 131.8973  |
| Pt                                               | -0.52578                                                                                                                             | 0.09434                                                                            | -0.29261                                      | 143.5042  | 160.0065  | 173.5037  |
| Cl                                               | 0.13537                                                                                                                              | 2.35820                                                                            | -0.49596                                      | 222.1871  | 244.4469  | 271.8355  |
| Cl                                               | -1.51283                                                                                                                             | -2.04969                                                                           | -0.39390                                      | 292.4516  | 297.8729  | 312.9043  |
| H                                                | -2.01479                                                                                                                             | -0.37824                                                                           | 2.22171                                       | 323.9412  | 365.7933  | 413.4900  |
| H                                                | -1.31222                                                                                                                             | 1.35322                                                                            | 2.29288                                       | 426.8764  | 516.1204  | 538.3508  |
| H                                                | -2.69420                                                                                                                             | 1.98127                                                                            | 0.35495                                       | 570.8766  | 635.5568  | 672.2428  |
| H                                                | -3.39477                                                                                                                             | 0.25346                                                                            | 0.30028                                       | 810.6335  | 851.6005  | 853.3775  |
| C                                                | 1.82851                                                                                                                              | -1.21426                                                                           | -0.38337                                      | 864.8492  | 883.4888  | 925.7250  |
| O                                                | 0.69437                                                                                                                              | -1.50956                                                                           | 1.75850                                       | 953.8652  | 1004.7848 | 1007.4186 |
| C                                                | 1.15406                                                                                                                              | -0.62664                                                                           | 0.85243                                       | 1035.6864 | 1043.6655 | 1065.2397 |
| C                                                | 0.95735                                                                                                                              | -0.58283                                                                           | -1.48403                                      | 1075.5702 | 1110.9419 | 1123.3348 |
| H                                                | 1.42568                                                                                                                              | 0.26451                                                                            | -1.98723                                      | 1159.3003 | 1192.9062 | 1198.5841 |
| H                                                | 0.53709                                                                                                                              | -1.30265                                                                           | -2.18461                                      | 1246.5029 | 1250.6608 | 1281.0281 |
| H                                                | 0.41583                                                                                                                              | -1.04460                                                                           | 2.55928                                       | 1306.5099 | 1322.0938 | 1330.5089 |
| C                                                | 2.02282                                                                                                                              | 0.51367                                                                            | 1.39102                                       | 1363.6782 | 1375.3713 | 1377.8858 |
| H                                                | 1.46858                                                                                                                              | 1.41538                                                                            | 1.65198                                       | 1426.3632 | 1467.8115 | 1472.8592 |
| C                                                | 3.08789                                                                                                                              | 0.72940                                                                            | 0.30617                                       | 1483.9408 | 1503.0390 | 1524.0733 |
| H                                                | 2.71774                                                                                                                              | 1.44839                                                                            | -0.42901                                      | 1677.3289 | 3058.1027 | 3087.4644 |
| H                                                | 4.01791                                                                                                                              | 1.12190                                                                            | 0.72221                                       | 3118.9708 | 3130.3268 | 3141.5296 |
| C                                                | 3.25839                                                                                                                              | -0.66353                                                                           | -0.32472                                      | 3145.0224 | 3159.1647 | 3172.4516 |
| H                                                | 3.72334                                                                                                                              | -0.63203                                                                           | -1.31373                                      | 3177.2097 | 3179.5291 | 3221.9091 |
| H                                                | 3.87534                                                                                                                              | -1.29926                                                                           | 0.32015                                       | 3257.0148 | 3284.5696 | 3851.5740 |
| H                                                | 2.49174                                                                                                                              | 0.10662                                                                            | 2.29720                                       |           |           |           |
| H                                                | 1.74378                                                                                                                              | -2.30282                                                                           | -0.38173                                      |           |           |           |
| <b><u>Statistical Thermodynamic Analysis</u></b> |                                                                                                                                      |                                                                                    |                                               |           |           |           |
| Temperature=298.15 K                             |                                                                                                                                      |                                                                                    | Pressure=1 atm                                |           |           |           |
| Zero-point correction= 0.211275                  |                                                                                                                                      |                                                                                    | Electronic Energy = -1427.69492913            |           |           |           |
| Internal Energy (E)= -1427.46878613              |                                                                                                                                      |                                                                                    | Enthalpy (H)= -1427.46784213                  |           |           |           |
| Gibbs Free Energy (G)=-1427.52613213             |                                                                                                                                      |                                                                                    | Gibbs Free Energy of Solvation=-1427.55966694 |           |           |           |

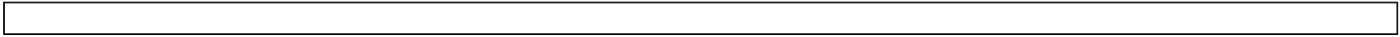



| St.Pt.                                           | General Structure                                                                 | Ball & Stick model                                                                 |                                              |           |           |           |
|--------------------------------------------------|-----------------------------------------------------------------------------------|------------------------------------------------------------------------------------|----------------------------------------------|-----------|-----------|-----------|
| 1MTS <sub>2</sub>                                | 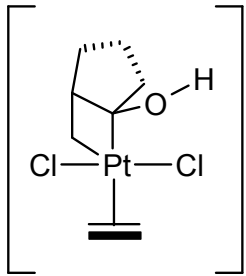 |  |                                              |           |           |           |
| <b><u>Cartesian co-ordinate</u></b>              |                                                                                   | <b><u>Frequencies</u></b>                                                          |                                              |           |           |           |
| -----<br>Atoms                                   | X                                                                                 | Y                                                                                  | Z                                            | -----     |           |           |
| -----                                            |                                                                                   |                                                                                    |                                              | -----     |           |           |
| C                                                | -2.69103                                                                          | 0.95394                                                                            | 0.82034                                      | -402.6412 | 74.8197   | 92.9946   |
| C                                                | -1.87499                                                                          | 0.63610                                                                            | 1.84238                                      | 100.3383  | 114.4929  | 125.9228  |
| Pt                                               | -0.51690                                                                          | 0.09817                                                                            | -0.29887                                     | 136.4702  | 145.1162  | 168.8999  |
| Cl                                               | 0.14613                                                                           | 2.35378                                                                            | -0.53076                                     | 181.3402  | 234.7186  | 254.8791  |
| Cl                                               | -1.51037                                                                          | -2.03483                                                                           | -0.42060                                     | 279.7358  | 305.6706  | 309.0655  |
| H                                                | -1.86227                                                                          | -0.36212                                                                           | 2.26921                                      | 320.7890  | 330.0811  | 377.4367  |
| H                                                | -1.22675                                                                          | 1.38454                                                                            | 2.29062                                      | 419.5856  | 430.8765  | 548.5055  |
| H                                                | -2.71942                                                                          | 1.96316                                                                            | 0.41929                                      | 579.0608  | 641.9752  | 665.6772  |
| H                                                | -3.37479                                                                          | 0.21863                                                                            | 0.40551                                      | 813.1815  | 841.3206  | 846.6041  |
| C                                                | 1.80144                                                                           | -1.22831                                                                           | -0.36263                                     | 859.7781  | 882.5386  | 923.2232  |
| O                                                | 0.49734                                                                           | -1.38596                                                                           | 1.80337                                      | 953.7440  | 1004.9005 | 1027.1441 |
| C                                                | 1.08236                                                                           | -0.59050                                                                           | 0.83999                                      | 1040.9723 | 1041.2935 | 1063.2095 |
| C                                                | 0.96550                                                                           | -0.59714                                                                           | -1.48830                                     | 1082.2982 | 1098.2088 | 1144.4993 |
| H                                                | 1.44551                                                                           | 0.24778                                                                            | -1.98374                                     | 1154.9506 | 1177.6314 | 1194.1953 |
| H                                                | 0.53769                                                                           | -1.31019                                                                           | -2.19084                                     | 1230.6309 | 1240.9319 | 1243.5503 |
| H                                                | 1.19895                                                                           | -1.83184                                                                           | 2.29873                                      | 1286.5678 | 1291.4894 | 1324.6567 |
| C                                                | 1.99633                                                                           | 0.50887                                                                            | 1.38918                                      | 1340.4844 | 1366.4153 | 1372.0053 |
| H                                                | 1.47148                                                                           | 1.42214                                                                            | 1.66859                                      | 1378.0670 | 1471.8069 | 1478.6352 |
| C                                                | 3.08382                                                                           | 0.69772                                                                            | 0.32707                                      | 1479.5207 | 1501.6375 | 1523.0144 |
| H                                                | 2.74197                                                                           | 1.41514                                                                            | -0.42387                                     | 1676.4925 | 3041.9939 | 3074.5087 |
| H                                                | 4.01505                                                                           | 1.07747                                                                            | 0.75246                                      | 3112.9855 | 3132.9998 | 3134.0223 |
| C                                                | 3.23924                                                                           | -0.70494                                                                           | -0.28638                                     | 3136.5611 | 3166.1735 | 3168.9749 |
| H                                                | 3.72591                                                                           | -0.69567                                                                           | -1.26549                                     | 3174.7135 | 3179.7012 | 3226.8528 |
| H                                                | 3.83570                                                                           | -1.34305                                                                           | 0.37678                                      | 3264.2586 | 3284.6447 | 3838.7545 |
| H                                                | 2.43666                                                                           | 0.08292                                                                            | 2.30314                                      |           |           |           |
| H                                                | 1.68956                                                                           | -2.31496                                                                           | -0.35239                                     |           |           |           |
| <b><u>Statistical Thermodynamic Analysis</u></b> |                                                                                   |                                                                                    |                                              |           |           |           |
| Temperature=298.15 K                             |                                                                                   |                                                                                    | Pressure=1 atm                               |           |           |           |
| Zero-point correction= 0.209890                  |                                                                                   |                                                                                    | Electronic Energy = -1427.68398025           |           |           |           |
| Internal Energy (E)= -1427.45966125              |                                                                                   |                                                                                    | Enthalpy (H)= -1427.45871625                 |           |           |           |
| Gibbs Free Energy (G)=-1427.51592725             |                                                                                   |                                                                                    | Gibbs Free Energy of Solvation=-1427.5512149 |           |           |           |

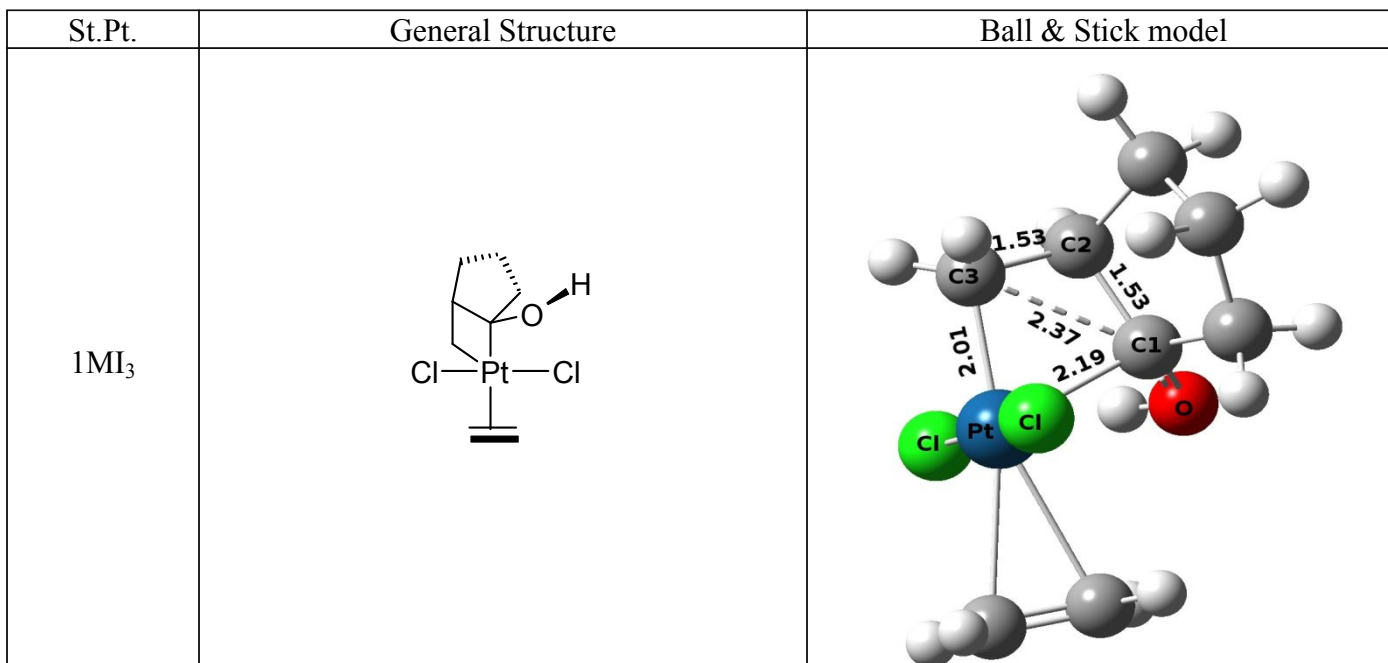

**Cartesian co-ordinate**

| Atoms | X        | Y        | Z        |
|-------|----------|----------|----------|
| C     | -2.72385 | 0.82956  | 0.79456  |
| C     | -1.87131 | 0.63896  | 1.82018  |
| Pt    | -0.53877 | 0.11804  | -0.30466 |
| Cl    | 0.08299  | 2.37609  | -0.45391 |
| Cl    | -1.37644 | -2.13422 | -0.38004 |
| H     | -1.79749 | -0.31974 | 2.32472  |
| H     | -1.27309 | 1.45910  | 2.20714  |
| H     | -2.83040 | 1.80740  | 0.33339  |
| H     | -3.36592 | 0.02638  | 0.44488  |
| C     | 1.82637  | -1.16440 | -0.42871 |
| O     | 0.62969  | -1.46579 | 1.77311  |
| C     | 1.15642  | -0.65170 | 0.85330  |
| C     | 0.96517  | -0.48255 | -1.50806 |
| H     | 1.44131  | 0.38607  | -1.96496 |
| H     | 0.56704  | -1.17135 | -2.25219 |
| C     | 2.01036  | 0.45270  | 1.45112  |
| H     | 1.43479  | 1.32600  | 1.75841  |
| C     | 3.07521  | 0.74006  | 0.38583  |
| H     | 2.70338  | 1.49808  | -0.30880 |
| H     | 4.00405  | 1.11070  | 0.82344  |
| C     | 3.25458  | -0.61150 | -0.32738 |
| H     | 3.72241  | -0.52114 | -1.31132 |
| H     | 3.87043  | -1.28170 | 0.28276  |
| H     | 2.46029  | 0.00392  | 2.34566  |
| H     | 1.75974  | -2.25342 | -0.49744 |
| H     | 0.12089  | -2.16985 | 1.32535  |

**Frequencies**

|           |           |           |
|-----------|-----------|-----------|
| 72.4947   | 77.7677   | 97.5313   |
| 117.8857  | 126.3536  | 140.3269  |
| 143.6949  | 173.4011  | 177.4511  |
| 224.1746  | 234.1874  | 280.2966  |
| 288.6975  | 293.9028  | 320.3751  |
| 328.4770  | 364.1429  | 436.2684  |
| 445.1202  | 517.0384  | 578.2169  |
| 625.1029  | 669.4198  | 729.2313  |
| 804.5401  | 834.7244  | 843.7566  |
| 858.1470  | 875.5440  | 923.2882  |
| 956.5145  | 1009.2390 | 1019.4869 |
| 1040.4362 | 1045.7410 | 1063.6329 |
| 1078.7139 | 1113.1128 | 1139.2166 |
| 1169.6113 | 1193.2733 | 1198.2594 |
| 1238.4919 | 1253.4234 | 1280.6964 |
| 1308.9677 | 1317.4995 | 1332.5328 |
| 1364.8892 | 1372.6054 | 1397.4877 |
| 1447.6739 | 1465.3453 | 1468.6855 |
| 1479.7649 | 1503.7008 | 1526.0966 |
| 1671.7095 | 3078.3818 | 3087.5698 |
| 3116.1064 | 3127.2268 | 3134.5675 |
| 3148.7288 | 3169.4200 | 3171.5839 |
| 3181.0082 | 3182.0379 | 3214.5960 |
| 3265.4078 | 3286.2741 | 3663.3101 |

**Statistical Thermodynamic Analysis**

|                                     |                                    |
|-------------------------------------|------------------------------------|
| Temperature=298.15 K                | Pressure=1 atm                     |
| Zero-point correction= 0.211607     | Electronic Energy = -1427.70866046 |
| Internal Energy (E)= -1427.48240046 | Enthalpy (H)= -1427.48145646       |

Gibbs Free Energy (G)=-1427.53919446    Gibbs Free Energy of Solvation=-1427.56750827

| St.Pt.                                           | General Structure | Ball & Stick model        |                |           |           |           |
|--------------------------------------------------|-------------------|---------------------------|----------------|-----------|-----------|-----------|
| IMTS <sub>3</sub>                                |                   |                           |                |           |           |           |
| <b><u>Cartesian co-ordinate</u></b>              |                   | <b><u>Frequencies</u></b> |                |           |           |           |
| -----<br>Atoms                                   | X                 | Y                         | Z              |           |           |           |
| -----                                            |                   |                           |                |           |           |           |
| C                                                | 2.85637           | -0.58577                  | 0.59946        | -138.1756 | 77.3860   | 91.7579   |
| C                                                | 2.06028           | -0.39265                  | 1.67879        | 100.0824  | 117.4208  | 131.0062  |
| Pt                                               | 0.65457           | -0.12456                  | -0.27971       | 144.4863  | 155.7848  | 168.0061  |
| Cl                                               | 0.09668           | -2.40543                  | -0.18622       | 185.8670  | 205.9501  | 250.3130  |
| Cl                                               | 1.10946           | 2.26959                   | -0.30990       | 281.0420  | 287.9897  | 319.8491  |
| H                                                | 1.97534           | 0.58569                   | 2.14269        | 330.9600  | 348.0334  | 439.5908  |
| H                                                | 1.57438           | -1.23066                  | 2.16865        | 468.1303  | 519.4780  | 585.1767  |
| H                                                | 3.02055           | -1.58219                  | 0.20093        | 617.6934  | 664.5841  | 790.6940  |
| H                                                | 3.42577           | 0.23409                   | 0.17190        | 821.4747  | 837.7719  | 839.2657  |
| C                                                | -1.97496          | 0.99202                   | -0.57283       | 864.0530  | 893.3953  | 917.7511  |
| O                                                | -0.96875          | 1.57505                   | 1.63223        | 958.4854  | 1006.2371 | 1019.7535 |
| C                                                | -1.55918          | 0.74213                   | 0.85413        | 1027.7172 | 1050.0608 | 1056.7054 |
| C                                                | -0.93706          | 0.25437                   | -1.45925       | 1072.8845 | 1094.2681 | 1156.3651 |
| H                                                | -1.34706          | -0.68193                  | -1.84113       | 1179.5655 | 1206.6210 | 1214.4458 |
| H                                                | -0.61348          | 0.89915                   | -2.27797       | 1239.7168 | 1256.9111 | 1293.3349 |
| C                                                | -2.29717          | -0.41371                  | 1.45088        | 1294.7622 | 1319.8312 | 1338.0496 |
| H                                                | -1.60403          | -1.16037                  | 1.84724        | 1361.8910 | 1365.6857 | 1434.9671 |
| C                                                | -3.18803          | -0.91316                  | 0.30322        | 1458.1537 | 1470.2025 | 1486.7626 |
| H                                                | -2.66279          | -1.70828                  | -0.23214       | 1503.8775 | 1521.7012 | 1609.8247 |
| H                                                | -4.13853          | -1.31024                  | 0.66209        | 1656.7184 | 3072.2909 | 3080.3974 |
| C                                                | -3.36284          | 0.32481                   | -0.59685       | 3114.1226 | 3125.9569 | 3128.6365 |
| H                                                | -3.65888          | 0.07465                   | -1.61808       | 3154.4842 | 3155.5072 | 3156.9964 |
| H                                                | -4.11813          | 0.99856                   | -0.17608       | 3177.6153 | 3183.1416 | 3189.3129 |
| H                                                | -2.87542          | -0.00516                  | 2.29047        | 3193.6125 | 3272.5367 | 3292.0165 |
| H                                                | -1.97525          | 2.06460                   | -0.78385       |           |           |           |
| H                                                | -0.39769          | 2.19873                   | 1.09338        |           |           |           |
| <b><u>Statistical Thermodynamic Analysis</u></b> |                   |                           |                |           |           |           |
| Temperature=298.15 K                             |                   |                           | Pressure=1 atm |           |           |           |

Zero-point correction= 0.210519

Internal Energy (E)= -1427.47996179

Gibbs Free Energy (G)=-1427.53571679

Electronic Energy = -1427.70458879

Enthalpy (H)= -1427.47901779

Gibbs Free Energy of Solvation=-1427.56256105

| St.Pt.                                           | General Structure | Ball & Stick model        |                                               |           |           |           |
|--------------------------------------------------|-------------------|---------------------------|-----------------------------------------------|-----------|-----------|-----------|
| 1Ml <sub>4</sub>                                 |                   |                           |                                               |           |           |           |
| <b><u>Cartesian co-ordinate</u></b>              |                   | <b><u>Frequencies</u></b> |                                               |           |           |           |
| -----<br>Atoms                                   | X                 | Y                         | Z                                             |           |           |           |
| -----                                            |                   |                           |                                               |           |           |           |
| C                                                | 3.12699           | 0.54239                   | -0.24125                                      | 35.3350   | 70.0342   | 92.1634   |
| C                                                | 2.77357           | 0.65267                   | 1.06912                                       | 106.5057  | 123.2822  | 129.7933  |
| Pt                                               | 0.87154           | -0.07879                  | -0.09759                                      | 146.9156  | 153.0937  | 162.8720  |
| Cl                                               | 1.48514           | -2.29975                  | 0.32333                                       | 181.5463  | 213.6835  | 226.4268  |
| Cl                                               | 0.25408           | 2.27348                   | -0.47352                                      | 262.7326  | 286.4428  | 306.9132  |
| H                                                | 2.46302           | 1.60678                   | 1.48321                                       | 326.7837  | 392.2480  | 500.9893  |
| H                                                | 2.92811           | -0.17080                  | 1.75845                                       | 512.8295  | 580.3164  | 598.5675  |
| H                                                | 3.57038           | -0.37212                  | -0.62187                                      | 618.4923  | 681.2451  | 706.9250  |
| H                                                | 3.10817           | 1.40576                   | -0.89878                                      | 830.4850  | 834.5975  | 853.2780  |
| C                                                | -2.16636          | 0.13539                   | -0.78389                                      | 870.5078  | 923.0155  | 946.6754  |
| O                                                | -1.91228          | 1.56194                   | 1.19009                                       | 992.3497  | 1021.7487 | 1027.2064 |
| C                                                | -2.51299          | 0.65980                   | 0.55737                                       | 1030.2236 | 1064.5818 | 1066.7859 |
| C                                                | -0.95471          | -0.83187                  | -0.58369                                      | 1079.0382 | 1103.4828 | 1145.9267 |
| H                                                | -1.20839          | -1.60439                  | 0.15012                                       | 1199.0006 | 1215.3837 | 1218.1147 |
| H                                                | -0.83001          | -1.34618                  | -1.54380                                      | 1236.7029 | 1260.3171 | 1284.8712 |
| C                                                | -3.70103          | -0.02737                  | 1.14565                                       | 1315.8979 | 1322.8372 | 1345.4257 |
| H                                                | -3.51939          | -0.31693                  | 2.18361                                       | 1352.6986 | 1365.1555 | 1438.6986 |
| C                                                | -4.00534          | -1.15821                  | 0.15115                                       | 1453.5844 | 1468.3333 | 1485.1859 |
| H                                                | -3.47567          | -2.06697                  | 0.44597                                       | 1504.0518 | 1518.7724 | 1641.0518 |
| H                                                | -5.06964          | -1.39125                  | 0.10441                                       | 1718.5302 | 2318.9606 | 3064.4856 |
| C                                                | -3.44959          | -0.62253                  | -1.18142                                      | 3076.8315 | 3087.9122 | 3116.1986 |
| H                                                | -3.23650          | -1.41554                  | -1.90047                                      | 3127.8807 | 3138.4874 | 3149.8850 |
| H                                                | -4.16893          | 0.06613                   | -1.63899                                      | 3157.9814 | 3173.4197 | 3178.3753 |
| H                                                | -4.50403          | 0.72380                   | 1.15622                                       | 3188.5256 | 3271.1318 | 3289.9807 |
| H                                                | -1.87145          | 0.93457                   | -1.46856                                      |           |           |           |
| H                                                | -1.09738          | 1.94221                   | 0.63690                                       |           |           |           |
| <b><u>Statistical Thermodynamic Analysis</u></b> |                   |                           |                                               |           |           |           |
| Temperature=298.15 K                             |                   |                           | Pressure=1 atm                                |           |           |           |
| Zero-point correction= 0.209342                  |                   |                           | Electronic Energy = -1427.70934541            |           |           |           |
| Internal Energy (E)= -1427.48513941              |                   |                           | Enthalpy (H)= -1427.48419541                  |           |           |           |
| Gibbs Free Energy (G)=-1427.54363841             |                   |                           | Gibbs Free Energy of Solvation=-1427.57442864 |           |           |           |

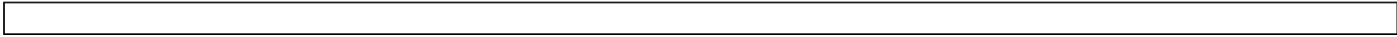

| St.Pt.                                           | General Structure                                                                                                                                                                                                                                                                                                                                                                                                                                                                                                                                                                                                                                                                                                                                                                                                                                                                                                                                                                                                                                                                                                                                                                                                                                                                                                                                                                                                                                                                                                                                                                                                                                                                                                                                                                                                                                                                                                                                                                                                                                                              | Ball & Stick model                            |          |   |   |   |          |         |         |   |          |         |         |    |          |         |          |    |          |         |          |    |          |          |          |   |          |          |         |   |          |         |         |   |          |         |          |   |          |          |          |   |         |         |          |   |         |          |         |   |         |          |         |   |         |          |          |   |         |         |          |   |         |         |          |   |         |          |          |   |         |         |          |   |         |         |         |   |         |          |         |   |         |          |         |   |         |         |          |   |         |          |         |   |         |          |         |   |         |          |          |   |         |         |         |   |         |          |          |                                                                                                                                                                                                                                                                                                                                                                                                                                                                                                                                                                                                                                                                                                                                                                                                                                                                                                                                                                                                                                                                                                                                                                                                                                                                                                                                                                                                                                                                                                                                                                                                                                                                         |         |         |         |          |          |          |          |          |          |          |          |          |          |          |          |          |          |          |          |          |          |          |          |          |          |          |          |          |          |          |          |           |           |           |           |           |           |           |           |           |           |           |           |           |           |           |           |           |           |           |           |           |           |           |           |           |           |           |           |           |           |           |           |           |           |           |           |           |           |           |           |           |
|--------------------------------------------------|--------------------------------------------------------------------------------------------------------------------------------------------------------------------------------------------------------------------------------------------------------------------------------------------------------------------------------------------------------------------------------------------------------------------------------------------------------------------------------------------------------------------------------------------------------------------------------------------------------------------------------------------------------------------------------------------------------------------------------------------------------------------------------------------------------------------------------------------------------------------------------------------------------------------------------------------------------------------------------------------------------------------------------------------------------------------------------------------------------------------------------------------------------------------------------------------------------------------------------------------------------------------------------------------------------------------------------------------------------------------------------------------------------------------------------------------------------------------------------------------------------------------------------------------------------------------------------------------------------------------------------------------------------------------------------------------------------------------------------------------------------------------------------------------------------------------------------------------------------------------------------------------------------------------------------------------------------------------------------------------------------------------------------------------------------------------------------|-----------------------------------------------|----------|---|---|---|----------|---------|---------|---|----------|---------|---------|----|----------|---------|----------|----|----------|---------|----------|----|----------|----------|----------|---|----------|----------|---------|---|----------|---------|---------|---|----------|---------|----------|---|----------|----------|----------|---|---------|---------|----------|---|---------|----------|---------|---|---------|----------|---------|---|---------|----------|----------|---|---------|---------|----------|---|---------|---------|----------|---|---------|----------|----------|---|---------|---------|----------|---|---------|---------|---------|---|---------|----------|---------|---|---------|----------|---------|---|---------|---------|----------|---|---------|----------|---------|---|---------|----------|---------|---|---------|----------|----------|---|---------|---------|---------|---|---------|----------|----------|-------------------------------------------------------------------------------------------------------------------------------------------------------------------------------------------------------------------------------------------------------------------------------------------------------------------------------------------------------------------------------------------------------------------------------------------------------------------------------------------------------------------------------------------------------------------------------------------------------------------------------------------------------------------------------------------------------------------------------------------------------------------------------------------------------------------------------------------------------------------------------------------------------------------------------------------------------------------------------------------------------------------------------------------------------------------------------------------------------------------------------------------------------------------------------------------------------------------------------------------------------------------------------------------------------------------------------------------------------------------------------------------------------------------------------------------------------------------------------------------------------------------------------------------------------------------------------------------------------------------------------------------------------------------------|---------|---------|---------|----------|----------|----------|----------|----------|----------|----------|----------|----------|----------|----------|----------|----------|----------|----------|----------|----------|----------|----------|----------|----------|----------|----------|----------|----------|----------|----------|----------|-----------|-----------|-----------|-----------|-----------|-----------|-----------|-----------|-----------|-----------|-----------|-----------|-----------|-----------|-----------|-----------|-----------|-----------|-----------|-----------|-----------|-----------|-----------|-----------|-----------|-----------|-----------|-----------|-----------|-----------|-----------|-----------|-----------|-----------|-----------|-----------|-----------|-----------|-----------|-----------|-----------|
| 1Ml <sub>5</sub>                                 |                                                                                                                                                                                                                                                                                                                                                                                                                                                                                                                                                                                                                                                                                                                                                                                                                                                                                                                                                                                                                                                                                                                                                                                                                                                                                                                                                                                                                                                                                                                                                                                                                                                                                                                                                                                                                                                                                                                                                                                                                                                                                |                                               |          |   |   |   |          |         |         |   |          |         |         |    |          |         |          |    |          |         |          |    |          |          |          |   |          |          |         |   |          |         |         |   |          |         |          |   |          |          |          |   |         |         |          |   |         |          |         |   |         |          |         |   |         |          |          |   |         |         |          |   |         |         |          |   |         |          |          |   |         |         |          |   |         |         |         |   |         |          |         |   |         |          |         |   |         |         |          |   |         |          |         |   |         |          |         |   |         |          |          |   |         |         |         |   |         |          |          |                                                                                                                                                                                                                                                                                                                                                                                                                                                                                                                                                                                                                                                                                                                                                                                                                                                                                                                                                                                                                                                                                                                                                                                                                                                                                                                                                                                                                                                                                                                                                                                                                                                                         |         |         |         |          |          |          |          |          |          |          |          |          |          |          |          |          |          |          |          |          |          |          |          |          |          |          |          |          |          |          |          |           |           |           |           |           |           |           |           |           |           |           |           |           |           |           |           |           |           |           |           |           |           |           |           |           |           |           |           |           |           |           |           |           |           |           |           |           |           |           |           |           |
|                                                  | <p style="text-align: center;"><b><u>Cartesian co-ordinate</u></b></p> <table border="1"> <thead> <tr> <th>Atoms</th> <th>X</th> <th>Y</th> <th>Z</th> </tr> </thead> <tbody> <tr><td>C</td><td>-3.17462</td><td>0.44850</td><td>0.35867</td></tr> <tr><td>C</td><td>-2.54108</td><td>0.24555</td><td>1.53878</td></tr> <tr><td>Pt</td><td>-0.86537</td><td>0.03009</td><td>-0.20296</td></tr> <tr><td>Cl</td><td>-0.38450</td><td>2.35368</td><td>-0.02861</td></tr> <tr><td>Cl</td><td>-1.26561</td><td>-2.29166</td><td>-0.27860</td></tr> <tr><td>H</td><td>-2.50645</td><td>-0.74214</td><td>1.98760</td></tr> <tr><td>H</td><td>-2.14659</td><td>1.08197</td><td>2.10743</td></tr> <tr><td>H</td><td>-3.29641</td><td>1.45015</td><td>-0.04212</td></tr> <tr><td>H</td><td>-3.65598</td><td>-0.37342</td><td>-0.16220</td></tr> <tr><td>C</td><td>2.09976</td><td>0.24782</td><td>-0.51118</td></tr> <tr><td>O</td><td>1.36034</td><td>-0.57704</td><td>1.66442</td></tr> <tr><td>C</td><td>2.27938</td><td>-0.29146</td><td>0.86084</td></tr> <tr><td>C</td><td>0.85289</td><td>-0.22617</td><td>-1.25290</td></tr> <tr><td>H</td><td>1.97584</td><td>1.33272</td><td>-0.31200</td></tr> <tr><td>H</td><td>0.74616</td><td>0.37621</td><td>-2.16032</td></tr> <tr><td>H</td><td>0.95888</td><td>-1.27860</td><td>-1.53101</td></tr> <tr><td>C</td><td>3.48717</td><td>0.01612</td><td>-1.14072</td></tr> <tr><td>C</td><td>4.46134</td><td>0.17770</td><td>0.03906</td></tr> <tr><td>C</td><td>3.71541</td><td>-0.48277</td><td>1.21059</td></tr> <tr><td>H</td><td>0.42480</td><td>-0.42325</td><td>1.19140</td></tr> <tr><td>H</td><td>3.68195</td><td>0.71191</td><td>-1.95741</td></tr> <tr><td>H</td><td>3.87043</td><td>-1.57171</td><td>1.21360</td></tr> <tr><td>H</td><td>3.94471</td><td>-0.12144</td><td>2.21545</td></tr> <tr><td>H</td><td>5.43615</td><td>-0.27681</td><td>-0.13977</td></tr> <tr><td>H</td><td>4.61744</td><td>1.23922</td><td>0.25303</td></tr> <tr><td>H</td><td>3.53533</td><td>-1.00164</td><td>-1.54490</td></tr> </tbody> </table> | Atoms                                         | X        | Y | Z | C | -3.17462 | 0.44850 | 0.35867 | C | -2.54108 | 0.24555 | 1.53878 | Pt | -0.86537 | 0.03009 | -0.20296 | Cl | -0.38450 | 2.35368 | -0.02861 | Cl | -1.26561 | -2.29166 | -0.27860 | H | -2.50645 | -0.74214 | 1.98760 | H | -2.14659 | 1.08197 | 2.10743 | H | -3.29641 | 1.45015 | -0.04212 | H | -3.65598 | -0.37342 | -0.16220 | C | 2.09976 | 0.24782 | -0.51118 | O | 1.36034 | -0.57704 | 1.66442 | C | 2.27938 | -0.29146 | 0.86084 | C | 0.85289 | -0.22617 | -1.25290 | H | 1.97584 | 1.33272 | -0.31200 | H | 0.74616 | 0.37621 | -2.16032 | H | 0.95888 | -1.27860 | -1.53101 | C | 3.48717 | 0.01612 | -1.14072 | C | 4.46134 | 0.17770 | 0.03906 | C | 3.71541 | -0.48277 | 1.21059 | H | 0.42480 | -0.42325 | 1.19140 | H | 3.68195 | 0.71191 | -1.95741 | H | 3.87043 | -1.57171 | 1.21360 | H | 3.94471 | -0.12144 | 2.21545 | H | 5.43615 | -0.27681 | -0.13977 | H | 4.61744 | 1.23922 | 0.25303 | H | 3.53533 | -1.00164 | -1.54490 | <p style="text-align: center;"><b><u>Frequencies</u></b></p> <table border="1"> <tbody> <tr><td>27.2547</td><td>62.8911</td><td>69.0469</td></tr> <tr><td>101.6269</td><td>106.1223</td><td>119.2245</td></tr> <tr><td>138.5268</td><td>146.8085</td><td>174.7270</td></tr> <tr><td>187.4775</td><td>202.8376</td><td>235.9484</td></tr> <tr><td>255.4671</td><td>303.1680</td><td>305.0058</td></tr> <tr><td>319.4264</td><td>341.3260</td><td>464.0952</td></tr> <tr><td>528.1147</td><td>532.8850</td><td>589.6351</td></tr> <tr><td>627.4702</td><td>659.0666</td><td>729.8961</td></tr> <tr><td>808.9482</td><td>840.8075</td><td>856.1165</td></tr> <tr><td>909.1980</td><td>932.5675</td><td>942.8883</td></tr> <tr><td>998.5301</td><td>1020.1122</td><td>1024.4254</td></tr> <tr><td>1037.1275</td><td>1062.5034</td><td>1064.7485</td></tr> <tr><td>1073.7255</td><td>1114.8585</td><td>1157.8466</td></tr> <tr><td>1182.7634</td><td>1196.7660</td><td>1224.1078</td></tr> <tr><td>1242.3597</td><td>1249.0395</td><td>1263.8464</td></tr> <tr><td>1317.9675</td><td>1329.3950</td><td>1337.6499</td></tr> <tr><td>1353.5997</td><td>1362.5839</td><td>1435.6921</td></tr> <tr><td>1460.8468</td><td>1468.1914</td><td>1479.9313</td></tr> <tr><td>1507.2908</td><td>1519.8560</td><td>1654.5929</td></tr> <tr><td>1700.4605</td><td>2265.0968</td><td>2970.3687</td></tr> <tr><td>3058.6526</td><td>3084.2336</td><td>3086.6986</td></tr> <tr><td>3103.6347</td><td>3152.4270</td><td>3152.4674</td></tr> <tr><td>3166.0662</td><td>3172.4670</td><td>3176.7214</td></tr> <tr><td>3191.7180</td><td>3269.5847</td><td>3294.7091</td></tr> </tbody> </table> | 27.2547 | 62.8911 | 69.0469 | 101.6269 | 106.1223 | 119.2245 | 138.5268 | 146.8085 | 174.7270 | 187.4775 | 202.8376 | 235.9484 | 255.4671 | 303.1680 | 305.0058 | 319.4264 | 341.3260 | 464.0952 | 528.1147 | 532.8850 | 589.6351 | 627.4702 | 659.0666 | 729.8961 | 808.9482 | 840.8075 | 856.1165 | 909.1980 | 932.5675 | 942.8883 | 998.5301 | 1020.1122 | 1024.4254 | 1037.1275 | 1062.5034 | 1064.7485 | 1073.7255 | 1114.8585 | 1157.8466 | 1182.7634 | 1196.7660 | 1224.1078 | 1242.3597 | 1249.0395 | 1263.8464 | 1317.9675 | 1329.3950 | 1337.6499 | 1353.5997 | 1362.5839 | 1435.6921 | 1460.8468 | 1468.1914 | 1479.9313 | 1507.2908 | 1519.8560 | 1654.5929 | 1700.4605 | 2265.0968 | 2970.3687 | 3058.6526 | 3084.2336 | 3086.6986 | 3103.6347 | 3152.4270 | 3152.4674 | 3166.0662 | 3172.4670 | 3176.7214 | 3191.7180 | 3269.5847 | 3294.7091 |
| Atoms                                            | X                                                                                                                                                                                                                                                                                                                                                                                                                                                                                                                                                                                                                                                                                                                                                                                                                                                                                                                                                                                                                                                                                                                                                                                                                                                                                                                                                                                                                                                                                                                                                                                                                                                                                                                                                                                                                                                                                                                                                                                                                                                                              | Y                                             | Z        |   |   |   |          |         |         |   |          |         |         |    |          |         |          |    |          |         |          |    |          |          |          |   |          |          |         |   |          |         |         |   |          |         |          |   |          |          |          |   |         |         |          |   |         |          |         |   |         |          |         |   |         |          |          |   |         |         |          |   |         |         |          |   |         |          |          |   |         |         |          |   |         |         |         |   |         |          |         |   |         |          |         |   |         |         |          |   |         |          |         |   |         |          |         |   |         |          |          |   |         |         |         |   |         |          |          |                                                                                                                                                                                                                                                                                                                                                                                                                                                                                                                                                                                                                                                                                                                                                                                                                                                                                                                                                                                                                                                                                                                                                                                                                                                                                                                                                                                                                                                                                                                                                                                                                                                                         |         |         |         |          |          |          |          |          |          |          |          |          |          |          |          |          |          |          |          |          |          |          |          |          |          |          |          |          |          |          |          |           |           |           |           |           |           |           |           |           |           |           |           |           |           |           |           |           |           |           |           |           |           |           |           |           |           |           |           |           |           |           |           |           |           |           |           |           |           |           |           |           |
| C                                                | -3.17462                                                                                                                                                                                                                                                                                                                                                                                                                                                                                                                                                                                                                                                                                                                                                                                                                                                                                                                                                                                                                                                                                                                                                                                                                                                                                                                                                                                                                                                                                                                                                                                                                                                                                                                                                                                                                                                                                                                                                                                                                                                                       | 0.44850                                       | 0.35867  |   |   |   |          |         |         |   |          |         |         |    |          |         |          |    |          |         |          |    |          |          |          |   |          |          |         |   |          |         |         |   |          |         |          |   |          |          |          |   |         |         |          |   |         |          |         |   |         |          |         |   |         |          |          |   |         |         |          |   |         |         |          |   |         |          |          |   |         |         |          |   |         |         |         |   |         |          |         |   |         |          |         |   |         |         |          |   |         |          |         |   |         |          |         |   |         |          |          |   |         |         |         |   |         |          |          |                                                                                                                                                                                                                                                                                                                                                                                                                                                                                                                                                                                                                                                                                                                                                                                                                                                                                                                                                                                                                                                                                                                                                                                                                                                                                                                                                                                                                                                                                                                                                                                                                                                                         |         |         |         |          |          |          |          |          |          |          |          |          |          |          |          |          |          |          |          |          |          |          |          |          |          |          |          |          |          |          |          |           |           |           |           |           |           |           |           |           |           |           |           |           |           |           |           |           |           |           |           |           |           |           |           |           |           |           |           |           |           |           |           |           |           |           |           |           |           |           |           |           |
| C                                                | -2.54108                                                                                                                                                                                                                                                                                                                                                                                                                                                                                                                                                                                                                                                                                                                                                                                                                                                                                                                                                                                                                                                                                                                                                                                                                                                                                                                                                                                                                                                                                                                                                                                                                                                                                                                                                                                                                                                                                                                                                                                                                                                                       | 0.24555                                       | 1.53878  |   |   |   |          |         |         |   |          |         |         |    |          |         |          |    |          |         |          |    |          |          |          |   |          |          |         |   |          |         |         |   |          |         |          |   |          |          |          |   |         |         |          |   |         |          |         |   |         |          |         |   |         |          |          |   |         |         |          |   |         |         |          |   |         |          |          |   |         |         |          |   |         |         |         |   |         |          |         |   |         |          |         |   |         |         |          |   |         |          |         |   |         |          |         |   |         |          |          |   |         |         |         |   |         |          |          |                                                                                                                                                                                                                                                                                                                                                                                                                                                                                                                                                                                                                                                                                                                                                                                                                                                                                                                                                                                                                                                                                                                                                                                                                                                                                                                                                                                                                                                                                                                                                                                                                                                                         |         |         |         |          |          |          |          |          |          |          |          |          |          |          |          |          |          |          |          |          |          |          |          |          |          |          |          |          |          |          |          |           |           |           |           |           |           |           |           |           |           |           |           |           |           |           |           |           |           |           |           |           |           |           |           |           |           |           |           |           |           |           |           |           |           |           |           |           |           |           |           |           |
| Pt                                               | -0.86537                                                                                                                                                                                                                                                                                                                                                                                                                                                                                                                                                                                                                                                                                                                                                                                                                                                                                                                                                                                                                                                                                                                                                                                                                                                                                                                                                                                                                                                                                                                                                                                                                                                                                                                                                                                                                                                                                                                                                                                                                                                                       | 0.03009                                       | -0.20296 |   |   |   |          |         |         |   |          |         |         |    |          |         |          |    |          |         |          |    |          |          |          |   |          |          |         |   |          |         |         |   |          |         |          |   |          |          |          |   |         |         |          |   |         |          |         |   |         |          |         |   |         |          |          |   |         |         |          |   |         |         |          |   |         |          |          |   |         |         |          |   |         |         |         |   |         |          |         |   |         |          |         |   |         |         |          |   |         |          |         |   |         |          |         |   |         |          |          |   |         |         |         |   |         |          |          |                                                                                                                                                                                                                                                                                                                                                                                                                                                                                                                                                                                                                                                                                                                                                                                                                                                                                                                                                                                                                                                                                                                                                                                                                                                                                                                                                                                                                                                                                                                                                                                                                                                                         |         |         |         |          |          |          |          |          |          |          |          |          |          |          |          |          |          |          |          |          |          |          |          |          |          |          |          |          |          |          |          |           |           |           |           |           |           |           |           |           |           |           |           |           |           |           |           |           |           |           |           |           |           |           |           |           |           |           |           |           |           |           |           |           |           |           |           |           |           |           |           |           |
| Cl                                               | -0.38450                                                                                                                                                                                                                                                                                                                                                                                                                                                                                                                                                                                                                                                                                                                                                                                                                                                                                                                                                                                                                                                                                                                                                                                                                                                                                                                                                                                                                                                                                                                                                                                                                                                                                                                                                                                                                                                                                                                                                                                                                                                                       | 2.35368                                       | -0.02861 |   |   |   |          |         |         |   |          |         |         |    |          |         |          |    |          |         |          |    |          |          |          |   |          |          |         |   |          |         |         |   |          |         |          |   |          |          |          |   |         |         |          |   |         |          |         |   |         |          |         |   |         |          |          |   |         |         |          |   |         |         |          |   |         |          |          |   |         |         |          |   |         |         |         |   |         |          |         |   |         |          |         |   |         |         |          |   |         |          |         |   |         |          |         |   |         |          |          |   |         |         |         |   |         |          |          |                                                                                                                                                                                                                                                                                                                                                                                                                                                                                                                                                                                                                                                                                                                                                                                                                                                                                                                                                                                                                                                                                                                                                                                                                                                                                                                                                                                                                                                                                                                                                                                                                                                                         |         |         |         |          |          |          |          |          |          |          |          |          |          |          |          |          |          |          |          |          |          |          |          |          |          |          |          |          |          |          |          |           |           |           |           |           |           |           |           |           |           |           |           |           |           |           |           |           |           |           |           |           |           |           |           |           |           |           |           |           |           |           |           |           |           |           |           |           |           |           |           |           |
| Cl                                               | -1.26561                                                                                                                                                                                                                                                                                                                                                                                                                                                                                                                                                                                                                                                                                                                                                                                                                                                                                                                                                                                                                                                                                                                                                                                                                                                                                                                                                                                                                                                                                                                                                                                                                                                                                                                                                                                                                                                                                                                                                                                                                                                                       | -2.29166                                      | -0.27860 |   |   |   |          |         |         |   |          |         |         |    |          |         |          |    |          |         |          |    |          |          |          |   |          |          |         |   |          |         |         |   |          |         |          |   |          |          |          |   |         |         |          |   |         |          |         |   |         |          |         |   |         |          |          |   |         |         |          |   |         |         |          |   |         |          |          |   |         |         |          |   |         |         |         |   |         |          |         |   |         |          |         |   |         |         |          |   |         |          |         |   |         |          |         |   |         |          |          |   |         |         |         |   |         |          |          |                                                                                                                                                                                                                                                                                                                                                                                                                                                                                                                                                                                                                                                                                                                                                                                                                                                                                                                                                                                                                                                                                                                                                                                                                                                                                                                                                                                                                                                                                                                                                                                                                                                                         |         |         |         |          |          |          |          |          |          |          |          |          |          |          |          |          |          |          |          |          |          |          |          |          |          |          |          |          |          |          |          |           |           |           |           |           |           |           |           |           |           |           |           |           |           |           |           |           |           |           |           |           |           |           |           |           |           |           |           |           |           |           |           |           |           |           |           |           |           |           |           |           |
| H                                                | -2.50645                                                                                                                                                                                                                                                                                                                                                                                                                                                                                                                                                                                                                                                                                                                                                                                                                                                                                                                                                                                                                                                                                                                                                                                                                                                                                                                                                                                                                                                                                                                                                                                                                                                                                                                                                                                                                                                                                                                                                                                                                                                                       | -0.74214                                      | 1.98760  |   |   |   |          |         |         |   |          |         |         |    |          |         |          |    |          |         |          |    |          |          |          |   |          |          |         |   |          |         |         |   |          |         |          |   |          |          |          |   |         |         |          |   |         |          |         |   |         |          |         |   |         |          |          |   |         |         |          |   |         |         |          |   |         |          |          |   |         |         |          |   |         |         |         |   |         |          |         |   |         |          |         |   |         |         |          |   |         |          |         |   |         |          |         |   |         |          |          |   |         |         |         |   |         |          |          |                                                                                                                                                                                                                                                                                                                                                                                                                                                                                                                                                                                                                                                                                                                                                                                                                                                                                                                                                                                                                                                                                                                                                                                                                                                                                                                                                                                                                                                                                                                                                                                                                                                                         |         |         |         |          |          |          |          |          |          |          |          |          |          |          |          |          |          |          |          |          |          |          |          |          |          |          |          |          |          |          |          |           |           |           |           |           |           |           |           |           |           |           |           |           |           |           |           |           |           |           |           |           |           |           |           |           |           |           |           |           |           |           |           |           |           |           |           |           |           |           |           |           |
| H                                                | -2.14659                                                                                                                                                                                                                                                                                                                                                                                                                                                                                                                                                                                                                                                                                                                                                                                                                                                                                                                                                                                                                                                                                                                                                                                                                                                                                                                                                                                                                                                                                                                                                                                                                                                                                                                                                                                                                                                                                                                                                                                                                                                                       | 1.08197                                       | 2.10743  |   |   |   |          |         |         |   |          |         |         |    |          |         |          |    |          |         |          |    |          |          |          |   |          |          |         |   |          |         |         |   |          |         |          |   |          |          |          |   |         |         |          |   |         |          |         |   |         |          |         |   |         |          |          |   |         |         |          |   |         |         |          |   |         |          |          |   |         |         |          |   |         |         |         |   |         |          |         |   |         |          |         |   |         |         |          |   |         |          |         |   |         |          |         |   |         |          |          |   |         |         |         |   |         |          |          |                                                                                                                                                                                                                                                                                                                                                                                                                                                                                                                                                                                                                                                                                                                                                                                                                                                                                                                                                                                                                                                                                                                                                                                                                                                                                                                                                                                                                                                                                                                                                                                                                                                                         |         |         |         |          |          |          |          |          |          |          |          |          |          |          |          |          |          |          |          |          |          |          |          |          |          |          |          |          |          |          |          |           |           |           |           |           |           |           |           |           |           |           |           |           |           |           |           |           |           |           |           |           |           |           |           |           |           |           |           |           |           |           |           |           |           |           |           |           |           |           |           |           |
| H                                                | -3.29641                                                                                                                                                                                                                                                                                                                                                                                                                                                                                                                                                                                                                                                                                                                                                                                                                                                                                                                                                                                                                                                                                                                                                                                                                                                                                                                                                                                                                                                                                                                                                                                                                                                                                                                                                                                                                                                                                                                                                                                                                                                                       | 1.45015                                       | -0.04212 |   |   |   |          |         |         |   |          |         |         |    |          |         |          |    |          |         |          |    |          |          |          |   |          |          |         |   |          |         |         |   |          |         |          |   |          |          |          |   |         |         |          |   |         |          |         |   |         |          |         |   |         |          |          |   |         |         |          |   |         |         |          |   |         |          |          |   |         |         |          |   |         |         |         |   |         |          |         |   |         |          |         |   |         |         |          |   |         |          |         |   |         |          |         |   |         |          |          |   |         |         |         |   |         |          |          |                                                                                                                                                                                                                                                                                                                                                                                                                                                                                                                                                                                                                                                                                                                                                                                                                                                                                                                                                                                                                                                                                                                                                                                                                                                                                                                                                                                                                                                                                                                                                                                                                                                                         |         |         |         |          |          |          |          |          |          |          |          |          |          |          |          |          |          |          |          |          |          |          |          |          |          |          |          |          |          |          |          |           |           |           |           |           |           |           |           |           |           |           |           |           |           |           |           |           |           |           |           |           |           |           |           |           |           |           |           |           |           |           |           |           |           |           |           |           |           |           |           |           |
| H                                                | -3.65598                                                                                                                                                                                                                                                                                                                                                                                                                                                                                                                                                                                                                                                                                                                                                                                                                                                                                                                                                                                                                                                                                                                                                                                                                                                                                                                                                                                                                                                                                                                                                                                                                                                                                                                                                                                                                                                                                                                                                                                                                                                                       | -0.37342                                      | -0.16220 |   |   |   |          |         |         |   |          |         |         |    |          |         |          |    |          |         |          |    |          |          |          |   |          |          |         |   |          |         |         |   |          |         |          |   |          |          |          |   |         |         |          |   |         |          |         |   |         |          |         |   |         |          |          |   |         |         |          |   |         |         |          |   |         |          |          |   |         |         |          |   |         |         |         |   |         |          |         |   |         |          |         |   |         |         |          |   |         |          |         |   |         |          |         |   |         |          |          |   |         |         |         |   |         |          |          |                                                                                                                                                                                                                                                                                                                                                                                                                                                                                                                                                                                                                                                                                                                                                                                                                                                                                                                                                                                                                                                                                                                                                                                                                                                                                                                                                                                                                                                                                                                                                                                                                                                                         |         |         |         |          |          |          |          |          |          |          |          |          |          |          |          |          |          |          |          |          |          |          |          |          |          |          |          |          |          |          |          |           |           |           |           |           |           |           |           |           |           |           |           |           |           |           |           |           |           |           |           |           |           |           |           |           |           |           |           |           |           |           |           |           |           |           |           |           |           |           |           |           |
| C                                                | 2.09976                                                                                                                                                                                                                                                                                                                                                                                                                                                                                                                                                                                                                                                                                                                                                                                                                                                                                                                                                                                                                                                                                                                                                                                                                                                                                                                                                                                                                                                                                                                                                                                                                                                                                                                                                                                                                                                                                                                                                                                                                                                                        | 0.24782                                       | -0.51118 |   |   |   |          |         |         |   |          |         |         |    |          |         |          |    |          |         |          |    |          |          |          |   |          |          |         |   |          |         |         |   |          |         |          |   |          |          |          |   |         |         |          |   |         |          |         |   |         |          |         |   |         |          |          |   |         |         |          |   |         |         |          |   |         |          |          |   |         |         |          |   |         |         |         |   |         |          |         |   |         |          |         |   |         |         |          |   |         |          |         |   |         |          |         |   |         |          |          |   |         |         |         |   |         |          |          |                                                                                                                                                                                                                                                                                                                                                                                                                                                                                                                                                                                                                                                                                                                                                                                                                                                                                                                                                                                                                                                                                                                                                                                                                                                                                                                                                                                                                                                                                                                                                                                                                                                                         |         |         |         |          |          |          |          |          |          |          |          |          |          |          |          |          |          |          |          |          |          |          |          |          |          |          |          |          |          |          |          |           |           |           |           |           |           |           |           |           |           |           |           |           |           |           |           |           |           |           |           |           |           |           |           |           |           |           |           |           |           |           |           |           |           |           |           |           |           |           |           |           |
| O                                                | 1.36034                                                                                                                                                                                                                                                                                                                                                                                                                                                                                                                                                                                                                                                                                                                                                                                                                                                                                                                                                                                                                                                                                                                                                                                                                                                                                                                                                                                                                                                                                                                                                                                                                                                                                                                                                                                                                                                                                                                                                                                                                                                                        | -0.57704                                      | 1.66442  |   |   |   |          |         |         |   |          |         |         |    |          |         |          |    |          |         |          |    |          |          |          |   |          |          |         |   |          |         |         |   |          |         |          |   |          |          |          |   |         |         |          |   |         |          |         |   |         |          |         |   |         |          |          |   |         |         |          |   |         |         |          |   |         |          |          |   |         |         |          |   |         |         |         |   |         |          |         |   |         |          |         |   |         |         |          |   |         |          |         |   |         |          |         |   |         |          |          |   |         |         |         |   |         |          |          |                                                                                                                                                                                                                                                                                                                                                                                                                                                                                                                                                                                                                                                                                                                                                                                                                                                                                                                                                                                                                                                                                                                                                                                                                                                                                                                                                                                                                                                                                                                                                                                                                                                                         |         |         |         |          |          |          |          |          |          |          |          |          |          |          |          |          |          |          |          |          |          |          |          |          |          |          |          |          |          |          |          |           |           |           |           |           |           |           |           |           |           |           |           |           |           |           |           |           |           |           |           |           |           |           |           |           |           |           |           |           |           |           |           |           |           |           |           |           |           |           |           |           |
| C                                                | 2.27938                                                                                                                                                                                                                                                                                                                                                                                                                                                                                                                                                                                                                                                                                                                                                                                                                                                                                                                                                                                                                                                                                                                                                                                                                                                                                                                                                                                                                                                                                                                                                                                                                                                                                                                                                                                                                                                                                                                                                                                                                                                                        | -0.29146                                      | 0.86084  |   |   |   |          |         |         |   |          |         |         |    |          |         |          |    |          |         |          |    |          |          |          |   |          |          |         |   |          |         |         |   |          |         |          |   |          |          |          |   |         |         |          |   |         |          |         |   |         |          |         |   |         |          |          |   |         |         |          |   |         |         |          |   |         |          |          |   |         |         |          |   |         |         |         |   |         |          |         |   |         |          |         |   |         |         |          |   |         |          |         |   |         |          |         |   |         |          |          |   |         |         |         |   |         |          |          |                                                                                                                                                                                                                                                                                                                                                                                                                                                                                                                                                                                                                                                                                                                                                                                                                                                                                                                                                                                                                                                                                                                                                                                                                                                                                                                                                                                                                                                                                                                                                                                                                                                                         |         |         |         |          |          |          |          |          |          |          |          |          |          |          |          |          |          |          |          |          |          |          |          |          |          |          |          |          |          |          |          |           |           |           |           |           |           |           |           |           |           |           |           |           |           |           |           |           |           |           |           |           |           |           |           |           |           |           |           |           |           |           |           |           |           |           |           |           |           |           |           |           |
| C                                                | 0.85289                                                                                                                                                                                                                                                                                                                                                                                                                                                                                                                                                                                                                                                                                                                                                                                                                                                                                                                                                                                                                                                                                                                                                                                                                                                                                                                                                                                                                                                                                                                                                                                                                                                                                                                                                                                                                                                                                                                                                                                                                                                                        | -0.22617                                      | -1.25290 |   |   |   |          |         |         |   |          |         |         |    |          |         |          |    |          |         |          |    |          |          |          |   |          |          |         |   |          |         |         |   |          |         |          |   |          |          |          |   |         |         |          |   |         |          |         |   |         |          |         |   |         |          |          |   |         |         |          |   |         |         |          |   |         |          |          |   |         |         |          |   |         |         |         |   |         |          |         |   |         |          |         |   |         |         |          |   |         |          |         |   |         |          |         |   |         |          |          |   |         |         |         |   |         |          |          |                                                                                                                                                                                                                                                                                                                                                                                                                                                                                                                                                                                                                                                                                                                                                                                                                                                                                                                                                                                                                                                                                                                                                                                                                                                                                                                                                                                                                                                                                                                                                                                                                                                                         |         |         |         |          |          |          |          |          |          |          |          |          |          |          |          |          |          |          |          |          |          |          |          |          |          |          |          |          |          |          |          |           |           |           |           |           |           |           |           |           |           |           |           |           |           |           |           |           |           |           |           |           |           |           |           |           |           |           |           |           |           |           |           |           |           |           |           |           |           |           |           |           |
| H                                                | 1.97584                                                                                                                                                                                                                                                                                                                                                                                                                                                                                                                                                                                                                                                                                                                                                                                                                                                                                                                                                                                                                                                                                                                                                                                                                                                                                                                                                                                                                                                                                                                                                                                                                                                                                                                                                                                                                                                                                                                                                                                                                                                                        | 1.33272                                       | -0.31200 |   |   |   |          |         |         |   |          |         |         |    |          |         |          |    |          |         |          |    |          |          |          |   |          |          |         |   |          |         |         |   |          |         |          |   |          |          |          |   |         |         |          |   |         |          |         |   |         |          |         |   |         |          |          |   |         |         |          |   |         |         |          |   |         |          |          |   |         |         |          |   |         |         |         |   |         |          |         |   |         |          |         |   |         |         |          |   |         |          |         |   |         |          |         |   |         |          |          |   |         |         |         |   |         |          |          |                                                                                                                                                                                                                                                                                                                                                                                                                                                                                                                                                                                                                                                                                                                                                                                                                                                                                                                                                                                                                                                                                                                                                                                                                                                                                                                                                                                                                                                                                                                                                                                                                                                                         |         |         |         |          |          |          |          |          |          |          |          |          |          |          |          |          |          |          |          |          |          |          |          |          |          |          |          |          |          |          |          |           |           |           |           |           |           |           |           |           |           |           |           |           |           |           |           |           |           |           |           |           |           |           |           |           |           |           |           |           |           |           |           |           |           |           |           |           |           |           |           |           |
| H                                                | 0.74616                                                                                                                                                                                                                                                                                                                                                                                                                                                                                                                                                                                                                                                                                                                                                                                                                                                                                                                                                                                                                                                                                                                                                                                                                                                                                                                                                                                                                                                                                                                                                                                                                                                                                                                                                                                                                                                                                                                                                                                                                                                                        | 0.37621                                       | -2.16032 |   |   |   |          |         |         |   |          |         |         |    |          |         |          |    |          |         |          |    |          |          |          |   |          |          |         |   |          |         |         |   |          |         |          |   |          |          |          |   |         |         |          |   |         |          |         |   |         |          |         |   |         |          |          |   |         |         |          |   |         |         |          |   |         |          |          |   |         |         |          |   |         |         |         |   |         |          |         |   |         |          |         |   |         |         |          |   |         |          |         |   |         |          |         |   |         |          |          |   |         |         |         |   |         |          |          |                                                                                                                                                                                                                                                                                                                                                                                                                                                                                                                                                                                                                                                                                                                                                                                                                                                                                                                                                                                                                                                                                                                                                                                                                                                                                                                                                                                                                                                                                                                                                                                                                                                                         |         |         |         |          |          |          |          |          |          |          |          |          |          |          |          |          |          |          |          |          |          |          |          |          |          |          |          |          |          |          |          |           |           |           |           |           |           |           |           |           |           |           |           |           |           |           |           |           |           |           |           |           |           |           |           |           |           |           |           |           |           |           |           |           |           |           |           |           |           |           |           |           |
| H                                                | 0.95888                                                                                                                                                                                                                                                                                                                                                                                                                                                                                                                                                                                                                                                                                                                                                                                                                                                                                                                                                                                                                                                                                                                                                                                                                                                                                                                                                                                                                                                                                                                                                                                                                                                                                                                                                                                                                                                                                                                                                                                                                                                                        | -1.27860                                      | -1.53101 |   |   |   |          |         |         |   |          |         |         |    |          |         |          |    |          |         |          |    |          |          |          |   |          |          |         |   |          |         |         |   |          |         |          |   |          |          |          |   |         |         |          |   |         |          |         |   |         |          |         |   |         |          |          |   |         |         |          |   |         |         |          |   |         |          |          |   |         |         |          |   |         |         |         |   |         |          |         |   |         |          |         |   |         |         |          |   |         |          |         |   |         |          |         |   |         |          |          |   |         |         |         |   |         |          |          |                                                                                                                                                                                                                                                                                                                                                                                                                                                                                                                                                                                                                                                                                                                                                                                                                                                                                                                                                                                                                                                                                                                                                                                                                                                                                                                                                                                                                                                                                                                                                                                                                                                                         |         |         |         |          |          |          |          |          |          |          |          |          |          |          |          |          |          |          |          |          |          |          |          |          |          |          |          |          |          |          |          |           |           |           |           |           |           |           |           |           |           |           |           |           |           |           |           |           |           |           |           |           |           |           |           |           |           |           |           |           |           |           |           |           |           |           |           |           |           |           |           |           |
| C                                                | 3.48717                                                                                                                                                                                                                                                                                                                                                                                                                                                                                                                                                                                                                                                                                                                                                                                                                                                                                                                                                                                                                                                                                                                                                                                                                                                                                                                                                                                                                                                                                                                                                                                                                                                                                                                                                                                                                                                                                                                                                                                                                                                                        | 0.01612                                       | -1.14072 |   |   |   |          |         |         |   |          |         |         |    |          |         |          |    |          |         |          |    |          |          |          |   |          |          |         |   |          |         |         |   |          |         |          |   |          |          |          |   |         |         |          |   |         |          |         |   |         |          |         |   |         |          |          |   |         |         |          |   |         |         |          |   |         |          |          |   |         |         |          |   |         |         |         |   |         |          |         |   |         |          |         |   |         |         |          |   |         |          |         |   |         |          |         |   |         |          |          |   |         |         |         |   |         |          |          |                                                                                                                                                                                                                                                                                                                                                                                                                                                                                                                                                                                                                                                                                                                                                                                                                                                                                                                                                                                                                                                                                                                                                                                                                                                                                                                                                                                                                                                                                                                                                                                                                                                                         |         |         |         |          |          |          |          |          |          |          |          |          |          |          |          |          |          |          |          |          |          |          |          |          |          |          |          |          |          |          |          |           |           |           |           |           |           |           |           |           |           |           |           |           |           |           |           |           |           |           |           |           |           |           |           |           |           |           |           |           |           |           |           |           |           |           |           |           |           |           |           |           |
| C                                                | 4.46134                                                                                                                                                                                                                                                                                                                                                                                                                                                                                                                                                                                                                                                                                                                                                                                                                                                                                                                                                                                                                                                                                                                                                                                                                                                                                                                                                                                                                                                                                                                                                                                                                                                                                                                                                                                                                                                                                                                                                                                                                                                                        | 0.17770                                       | 0.03906  |   |   |   |          |         |         |   |          |         |         |    |          |         |          |    |          |         |          |    |          |          |          |   |          |          |         |   |          |         |         |   |          |         |          |   |          |          |          |   |         |         |          |   |         |          |         |   |         |          |         |   |         |          |          |   |         |         |          |   |         |         |          |   |         |          |          |   |         |         |          |   |         |         |         |   |         |          |         |   |         |          |         |   |         |         |          |   |         |          |         |   |         |          |         |   |         |          |          |   |         |         |         |   |         |          |          |                                                                                                                                                                                                                                                                                                                                                                                                                                                                                                                                                                                                                                                                                                                                                                                                                                                                                                                                                                                                                                                                                                                                                                                                                                                                                                                                                                                                                                                                                                                                                                                                                                                                         |         |         |         |          |          |          |          |          |          |          |          |          |          |          |          |          |          |          |          |          |          |          |          |          |          |          |          |          |          |          |          |           |           |           |           |           |           |           |           |           |           |           |           |           |           |           |           |           |           |           |           |           |           |           |           |           |           |           |           |           |           |           |           |           |           |           |           |           |           |           |           |           |
| C                                                | 3.71541                                                                                                                                                                                                                                                                                                                                                                                                                                                                                                                                                                                                                                                                                                                                                                                                                                                                                                                                                                                                                                                                                                                                                                                                                                                                                                                                                                                                                                                                                                                                                                                                                                                                                                                                                                                                                                                                                                                                                                                                                                                                        | -0.48277                                      | 1.21059  |   |   |   |          |         |         |   |          |         |         |    |          |         |          |    |          |         |          |    |          |          |          |   |          |          |         |   |          |         |         |   |          |         |          |   |          |          |          |   |         |         |          |   |         |          |         |   |         |          |         |   |         |          |          |   |         |         |          |   |         |         |          |   |         |          |          |   |         |         |          |   |         |         |         |   |         |          |         |   |         |          |         |   |         |         |          |   |         |          |         |   |         |          |         |   |         |          |          |   |         |         |         |   |         |          |          |                                                                                                                                                                                                                                                                                                                                                                                                                                                                                                                                                                                                                                                                                                                                                                                                                                                                                                                                                                                                                                                                                                                                                                                                                                                                                                                                                                                                                                                                                                                                                                                                                                                                         |         |         |         |          |          |          |          |          |          |          |          |          |          |          |          |          |          |          |          |          |          |          |          |          |          |          |          |          |          |          |          |           |           |           |           |           |           |           |           |           |           |           |           |           |           |           |           |           |           |           |           |           |           |           |           |           |           |           |           |           |           |           |           |           |           |           |           |           |           |           |           |           |
| H                                                | 0.42480                                                                                                                                                                                                                                                                                                                                                                                                                                                                                                                                                                                                                                                                                                                                                                                                                                                                                                                                                                                                                                                                                                                                                                                                                                                                                                                                                                                                                                                                                                                                                                                                                                                                                                                                                                                                                                                                                                                                                                                                                                                                        | -0.42325                                      | 1.19140  |   |   |   |          |         |         |   |          |         |         |    |          |         |          |    |          |         |          |    |          |          |          |   |          |          |         |   |          |         |         |   |          |         |          |   |          |          |          |   |         |         |          |   |         |          |         |   |         |          |         |   |         |          |          |   |         |         |          |   |         |         |          |   |         |          |          |   |         |         |          |   |         |         |         |   |         |          |         |   |         |          |         |   |         |         |          |   |         |          |         |   |         |          |         |   |         |          |          |   |         |         |         |   |         |          |          |                                                                                                                                                                                                                                                                                                                                                                                                                                                                                                                                                                                                                                                                                                                                                                                                                                                                                                                                                                                                                                                                                                                                                                                                                                                                                                                                                                                                                                                                                                                                                                                                                                                                         |         |         |         |          |          |          |          |          |          |          |          |          |          |          |          |          |          |          |          |          |          |          |          |          |          |          |          |          |          |          |          |           |           |           |           |           |           |           |           |           |           |           |           |           |           |           |           |           |           |           |           |           |           |           |           |           |           |           |           |           |           |           |           |           |           |           |           |           |           |           |           |           |
| H                                                | 3.68195                                                                                                                                                                                                                                                                                                                                                                                                                                                                                                                                                                                                                                                                                                                                                                                                                                                                                                                                                                                                                                                                                                                                                                                                                                                                                                                                                                                                                                                                                                                                                                                                                                                                                                                                                                                                                                                                                                                                                                                                                                                                        | 0.71191                                       | -1.95741 |   |   |   |          |         |         |   |          |         |         |    |          |         |          |    |          |         |          |    |          |          |          |   |          |          |         |   |          |         |         |   |          |         |          |   |          |          |          |   |         |         |          |   |         |          |         |   |         |          |         |   |         |          |          |   |         |         |          |   |         |         |          |   |         |          |          |   |         |         |          |   |         |         |         |   |         |          |         |   |         |          |         |   |         |         |          |   |         |          |         |   |         |          |         |   |         |          |          |   |         |         |         |   |         |          |          |                                                                                                                                                                                                                                                                                                                                                                                                                                                                                                                                                                                                                                                                                                                                                                                                                                                                                                                                                                                                                                                                                                                                                                                                                                                                                                                                                                                                                                                                                                                                                                                                                                                                         |         |         |         |          |          |          |          |          |          |          |          |          |          |          |          |          |          |          |          |          |          |          |          |          |          |          |          |          |          |          |          |           |           |           |           |           |           |           |           |           |           |           |           |           |           |           |           |           |           |           |           |           |           |           |           |           |           |           |           |           |           |           |           |           |           |           |           |           |           |           |           |           |
| H                                                | 3.87043                                                                                                                                                                                                                                                                                                                                                                                                                                                                                                                                                                                                                                                                                                                                                                                                                                                                                                                                                                                                                                                                                                                                                                                                                                                                                                                                                                                                                                                                                                                                                                                                                                                                                                                                                                                                                                                                                                                                                                                                                                                                        | -1.57171                                      | 1.21360  |   |   |   |          |         |         |   |          |         |         |    |          |         |          |    |          |         |          |    |          |          |          |   |          |          |         |   |          |         |         |   |          |         |          |   |          |          |          |   |         |         |          |   |         |          |         |   |         |          |         |   |         |          |          |   |         |         |          |   |         |         |          |   |         |          |          |   |         |         |          |   |         |         |         |   |         |          |         |   |         |          |         |   |         |         |          |   |         |          |         |   |         |          |         |   |         |          |          |   |         |         |         |   |         |          |          |                                                                                                                                                                                                                                                                                                                                                                                                                                                                                                                                                                                                                                                                                                                                                                                                                                                                                                                                                                                                                                                                                                                                                                                                                                                                                                                                                                                                                                                                                                                                                                                                                                                                         |         |         |         |          |          |          |          |          |          |          |          |          |          |          |          |          |          |          |          |          |          |          |          |          |          |          |          |          |          |          |          |           |           |           |           |           |           |           |           |           |           |           |           |           |           |           |           |           |           |           |           |           |           |           |           |           |           |           |           |           |           |           |           |           |           |           |           |           |           |           |           |           |
| H                                                | 3.94471                                                                                                                                                                                                                                                                                                                                                                                                                                                                                                                                                                                                                                                                                                                                                                                                                                                                                                                                                                                                                                                                                                                                                                                                                                                                                                                                                                                                                                                                                                                                                                                                                                                                                                                                                                                                                                                                                                                                                                                                                                                                        | -0.12144                                      | 2.21545  |   |   |   |          |         |         |   |          |         |         |    |          |         |          |    |          |         |          |    |          |          |          |   |          |          |         |   |          |         |         |   |          |         |          |   |          |          |          |   |         |         |          |   |         |          |         |   |         |          |         |   |         |          |          |   |         |         |          |   |         |         |          |   |         |          |          |   |         |         |          |   |         |         |         |   |         |          |         |   |         |          |         |   |         |         |          |   |         |          |         |   |         |          |         |   |         |          |          |   |         |         |         |   |         |          |          |                                                                                                                                                                                                                                                                                                                                                                                                                                                                                                                                                                                                                                                                                                                                                                                                                                                                                                                                                                                                                                                                                                                                                                                                                                                                                                                                                                                                                                                                                                                                                                                                                                                                         |         |         |         |          |          |          |          |          |          |          |          |          |          |          |          |          |          |          |          |          |          |          |          |          |          |          |          |          |          |          |          |           |           |           |           |           |           |           |           |           |           |           |           |           |           |           |           |           |           |           |           |           |           |           |           |           |           |           |           |           |           |           |           |           |           |           |           |           |           |           |           |           |
| H                                                | 5.43615                                                                                                                                                                                                                                                                                                                                                                                                                                                                                                                                                                                                                                                                                                                                                                                                                                                                                                                                                                                                                                                                                                                                                                                                                                                                                                                                                                                                                                                                                                                                                                                                                                                                                                                                                                                                                                                                                                                                                                                                                                                                        | -0.27681                                      | -0.13977 |   |   |   |          |         |         |   |          |         |         |    |          |         |          |    |          |         |          |    |          |          |          |   |          |          |         |   |          |         |         |   |          |         |          |   |          |          |          |   |         |         |          |   |         |          |         |   |         |          |         |   |         |          |          |   |         |         |          |   |         |         |          |   |         |          |          |   |         |         |          |   |         |         |         |   |         |          |         |   |         |          |         |   |         |         |          |   |         |          |         |   |         |          |         |   |         |          |          |   |         |         |         |   |         |          |          |                                                                                                                                                                                                                                                                                                                                                                                                                                                                                                                                                                                                                                                                                                                                                                                                                                                                                                                                                                                                                                                                                                                                                                                                                                                                                                                                                                                                                                                                                                                                                                                                                                                                         |         |         |         |          |          |          |          |          |          |          |          |          |          |          |          |          |          |          |          |          |          |          |          |          |          |          |          |          |          |          |          |           |           |           |           |           |           |           |           |           |           |           |           |           |           |           |           |           |           |           |           |           |           |           |           |           |           |           |           |           |           |           |           |           |           |           |           |           |           |           |           |           |
| H                                                | 4.61744                                                                                                                                                                                                                                                                                                                                                                                                                                                                                                                                                                                                                                                                                                                                                                                                                                                                                                                                                                                                                                                                                                                                                                                                                                                                                                                                                                                                                                                                                                                                                                                                                                                                                                                                                                                                                                                                                                                                                                                                                                                                        | 1.23922                                       | 0.25303  |   |   |   |          |         |         |   |          |         |         |    |          |         |          |    |          |         |          |    |          |          |          |   |          |          |         |   |          |         |         |   |          |         |          |   |          |          |          |   |         |         |          |   |         |          |         |   |         |          |         |   |         |          |          |   |         |         |          |   |         |         |          |   |         |          |          |   |         |         |          |   |         |         |         |   |         |          |         |   |         |          |         |   |         |         |          |   |         |          |         |   |         |          |         |   |         |          |          |   |         |         |         |   |         |          |          |                                                                                                                                                                                                                                                                                                                                                                                                                                                                                                                                                                                                                                                                                                                                                                                                                                                                                                                                                                                                                                                                                                                                                                                                                                                                                                                                                                                                                                                                                                                                                                                                                                                                         |         |         |         |          |          |          |          |          |          |          |          |          |          |          |          |          |          |          |          |          |          |          |          |          |          |          |          |          |          |          |          |           |           |           |           |           |           |           |           |           |           |           |           |           |           |           |           |           |           |           |           |           |           |           |           |           |           |           |           |           |           |           |           |           |           |           |           |           |           |           |           |           |
| H                                                | 3.53533                                                                                                                                                                                                                                                                                                                                                                                                                                                                                                                                                                                                                                                                                                                                                                                                                                                                                                                                                                                                                                                                                                                                                                                                                                                                                                                                                                                                                                                                                                                                                                                                                                                                                                                                                                                                                                                                                                                                                                                                                                                                        | -1.00164                                      | -1.54490 |   |   |   |          |         |         |   |          |         |         |    |          |         |          |    |          |         |          |    |          |          |          |   |          |          |         |   |          |         |         |   |          |         |          |   |          |          |          |   |         |         |          |   |         |          |         |   |         |          |         |   |         |          |          |   |         |         |          |   |         |         |          |   |         |          |          |   |         |         |          |   |         |         |         |   |         |          |         |   |         |          |         |   |         |         |          |   |         |          |         |   |         |          |         |   |         |          |          |   |         |         |         |   |         |          |          |                                                                                                                                                                                                                                                                                                                                                                                                                                                                                                                                                                                                                                                                                                                                                                                                                                                                                                                                                                                                                                                                                                                                                                                                                                                                                                                                                                                                                                                                                                                                                                                                                                                                         |         |         |         |          |          |          |          |          |          |          |          |          |          |          |          |          |          |          |          |          |          |          |          |          |          |          |          |          |          |          |          |           |           |           |           |           |           |           |           |           |           |           |           |           |           |           |           |           |           |           |           |           |           |           |           |           |           |           |           |           |           |           |           |           |           |           |           |           |           |           |           |           |
| 27.2547                                          | 62.8911                                                                                                                                                                                                                                                                                                                                                                                                                                                                                                                                                                                                                                                                                                                                                                                                                                                                                                                                                                                                                                                                                                                                                                                                                                                                                                                                                                                                                                                                                                                                                                                                                                                                                                                                                                                                                                                                                                                                                                                                                                                                        | 69.0469                                       |          |   |   |   |          |         |         |   |          |         |         |    |          |         |          |    |          |         |          |    |          |          |          |   |          |          |         |   |          |         |         |   |          |         |          |   |          |          |          |   |         |         |          |   |         |          |         |   |         |          |         |   |         |          |          |   |         |         |          |   |         |         |          |   |         |          |          |   |         |         |          |   |         |         |         |   |         |          |         |   |         |          |         |   |         |         |          |   |         |          |         |   |         |          |         |   |         |          |          |   |         |         |         |   |         |          |          |                                                                                                                                                                                                                                                                                                                                                                                                                                                                                                                                                                                                                                                                                                                                                                                                                                                                                                                                                                                                                                                                                                                                                                                                                                                                                                                                                                                                                                                                                                                                                                                                                                                                         |         |         |         |          |          |          |          |          |          |          |          |          |          |          |          |          |          |          |          |          |          |          |          |          |          |          |          |          |          |          |          |           |           |           |           |           |           |           |           |           |           |           |           |           |           |           |           |           |           |           |           |           |           |           |           |           |           |           |           |           |           |           |           |           |           |           |           |           |           |           |           |           |
| 101.6269                                         | 106.1223                                                                                                                                                                                                                                                                                                                                                                                                                                                                                                                                                                                                                                                                                                                                                                                                                                                                                                                                                                                                                                                                                                                                                                                                                                                                                                                                                                                                                                                                                                                                                                                                                                                                                                                                                                                                                                                                                                                                                                                                                                                                       | 119.2245                                      |          |   |   |   |          |         |         |   |          |         |         |    |          |         |          |    |          |         |          |    |          |          |          |   |          |          |         |   |          |         |         |   |          |         |          |   |          |          |          |   |         |         |          |   |         |          |         |   |         |          |         |   |         |          |          |   |         |         |          |   |         |         |          |   |         |          |          |   |         |         |          |   |         |         |         |   |         |          |         |   |         |          |         |   |         |         |          |   |         |          |         |   |         |          |         |   |         |          |          |   |         |         |         |   |         |          |          |                                                                                                                                                                                                                                                                                                                                                                                                                                                                                                                                                                                                                                                                                                                                                                                                                                                                                                                                                                                                                                                                                                                                                                                                                                                                                                                                                                                                                                                                                                                                                                                                                                                                         |         |         |         |          |          |          |          |          |          |          |          |          |          |          |          |          |          |          |          |          |          |          |          |          |          |          |          |          |          |          |          |           |           |           |           |           |           |           |           |           |           |           |           |           |           |           |           |           |           |           |           |           |           |           |           |           |           |           |           |           |           |           |           |           |           |           |           |           |           |           |           |           |
| 138.5268                                         | 146.8085                                                                                                                                                                                                                                                                                                                                                                                                                                                                                                                                                                                                                                                                                                                                                                                                                                                                                                                                                                                                                                                                                                                                                                                                                                                                                                                                                                                                                                                                                                                                                                                                                                                                                                                                                                                                                                                                                                                                                                                                                                                                       | 174.7270                                      |          |   |   |   |          |         |         |   |          |         |         |    |          |         |          |    |          |         |          |    |          |          |          |   |          |          |         |   |          |         |         |   |          |         |          |   |          |          |          |   |         |         |          |   |         |          |         |   |         |          |         |   |         |          |          |   |         |         |          |   |         |         |          |   |         |          |          |   |         |         |          |   |         |         |         |   |         |          |         |   |         |          |         |   |         |         |          |   |         |          |         |   |         |          |         |   |         |          |          |   |         |         |         |   |         |          |          |                                                                                                                                                                                                                                                                                                                                                                                                                                                                                                                                                                                                                                                                                                                                                                                                                                                                                                                                                                                                                                                                                                                                                                                                                                                                                                                                                                                                                                                                                                                                                                                                                                                                         |         |         |         |          |          |          |          |          |          |          |          |          |          |          |          |          |          |          |          |          |          |          |          |          |          |          |          |          |          |          |          |           |           |           |           |           |           |           |           |           |           |           |           |           |           |           |           |           |           |           |           |           |           |           |           |           |           |           |           |           |           |           |           |           |           |           |           |           |           |           |           |           |
| 187.4775                                         | 202.8376                                                                                                                                                                                                                                                                                                                                                                                                                                                                                                                                                                                                                                                                                                                                                                                                                                                                                                                                                                                                                                                                                                                                                                                                                                                                                                                                                                                                                                                                                                                                                                                                                                                                                                                                                                                                                                                                                                                                                                                                                                                                       | 235.9484                                      |          |   |   |   |          |         |         |   |          |         |         |    |          |         |          |    |          |         |          |    |          |          |          |   |          |          |         |   |          |         |         |   |          |         |          |   |          |          |          |   |         |         |          |   |         |          |         |   |         |          |         |   |         |          |          |   |         |         |          |   |         |         |          |   |         |          |          |   |         |         |          |   |         |         |         |   |         |          |         |   |         |          |         |   |         |         |          |   |         |          |         |   |         |          |         |   |         |          |          |   |         |         |         |   |         |          |          |                                                                                                                                                                                                                                                                                                                                                                                                                                                                                                                                                                                                                                                                                                                                                                                                                                                                                                                                                                                                                                                                                                                                                                                                                                                                                                                                                                                                                                                                                                                                                                                                                                                                         |         |         |         |          |          |          |          |          |          |          |          |          |          |          |          |          |          |          |          |          |          |          |          |          |          |          |          |          |          |          |          |           |           |           |           |           |           |           |           |           |           |           |           |           |           |           |           |           |           |           |           |           |           |           |           |           |           |           |           |           |           |           |           |           |           |           |           |           |           |           |           |           |
| 255.4671                                         | 303.1680                                                                                                                                                                                                                                                                                                                                                                                                                                                                                                                                                                                                                                                                                                                                                                                                                                                                                                                                                                                                                                                                                                                                                                                                                                                                                                                                                                                                                                                                                                                                                                                                                                                                                                                                                                                                                                                                                                                                                                                                                                                                       | 305.0058                                      |          |   |   |   |          |         |         |   |          |         |         |    |          |         |          |    |          |         |          |    |          |          |          |   |          |          |         |   |          |         |         |   |          |         |          |   |          |          |          |   |         |         |          |   |         |          |         |   |         |          |         |   |         |          |          |   |         |         |          |   |         |         |          |   |         |          |          |   |         |         |          |   |         |         |         |   |         |          |         |   |         |          |         |   |         |         |          |   |         |          |         |   |         |          |         |   |         |          |          |   |         |         |         |   |         |          |          |                                                                                                                                                                                                                                                                                                                                                                                                                                                                                                                                                                                                                                                                                                                                                                                                                                                                                                                                                                                                                                                                                                                                                                                                                                                                                                                                                                                                                                                                                                                                                                                                                                                                         |         |         |         |          |          |          |          |          |          |          |          |          |          |          |          |          |          |          |          |          |          |          |          |          |          |          |          |          |          |          |          |           |           |           |           |           |           |           |           |           |           |           |           |           |           |           |           |           |           |           |           |           |           |           |           |           |           |           |           |           |           |           |           |           |           |           |           |           |           |           |           |           |
| 319.4264                                         | 341.3260                                                                                                                                                                                                                                                                                                                                                                                                                                                                                                                                                                                                                                                                                                                                                                                                                                                                                                                                                                                                                                                                                                                                                                                                                                                                                                                                                                                                                                                                                                                                                                                                                                                                                                                                                                                                                                                                                                                                                                                                                                                                       | 464.0952                                      |          |   |   |   |          |         |         |   |          |         |         |    |          |         |          |    |          |         |          |    |          |          |          |   |          |          |         |   |          |         |         |   |          |         |          |   |          |          |          |   |         |         |          |   |         |          |         |   |         |          |         |   |         |          |          |   |         |         |          |   |         |         |          |   |         |          |          |   |         |         |          |   |         |         |         |   |         |          |         |   |         |          |         |   |         |         |          |   |         |          |         |   |         |          |         |   |         |          |          |   |         |         |         |   |         |          |          |                                                                                                                                                                                                                                                                                                                                                                                                                                                                                                                                                                                                                                                                                                                                                                                                                                                                                                                                                                                                                                                                                                                                                                                                                                                                                                                                                                                                                                                                                                                                                                                                                                                                         |         |         |         |          |          |          |          |          |          |          |          |          |          |          |          |          |          |          |          |          |          |          |          |          |          |          |          |          |          |          |          |           |           |           |           |           |           |           |           |           |           |           |           |           |           |           |           |           |           |           |           |           |           |           |           |           |           |           |           |           |           |           |           |           |           |           |           |           |           |           |           |           |
| 528.1147                                         | 532.8850                                                                                                                                                                                                                                                                                                                                                                                                                                                                                                                                                                                                                                                                                                                                                                                                                                                                                                                                                                                                                                                                                                                                                                                                                                                                                                                                                                                                                                                                                                                                                                                                                                                                                                                                                                                                                                                                                                                                                                                                                                                                       | 589.6351                                      |          |   |   |   |          |         |         |   |          |         |         |    |          |         |          |    |          |         |          |    |          |          |          |   |          |          |         |   |          |         |         |   |          |         |          |   |          |          |          |   |         |         |          |   |         |          |         |   |         |          |         |   |         |          |          |   |         |         |          |   |         |         |          |   |         |          |          |   |         |         |          |   |         |         |         |   |         |          |         |   |         |          |         |   |         |         |          |   |         |          |         |   |         |          |         |   |         |          |          |   |         |         |         |   |         |          |          |                                                                                                                                                                                                                                                                                                                                                                                                                                                                                                                                                                                                                                                                                                                                                                                                                                                                                                                                                                                                                                                                                                                                                                                                                                                                                                                                                                                                                                                                                                                                                                                                                                                                         |         |         |         |          |          |          |          |          |          |          |          |          |          |          |          |          |          |          |          |          |          |          |          |          |          |          |          |          |          |          |          |           |           |           |           |           |           |           |           |           |           |           |           |           |           |           |           |           |           |           |           |           |           |           |           |           |           |           |           |           |           |           |           |           |           |           |           |           |           |           |           |           |
| 627.4702                                         | 659.0666                                                                                                                                                                                                                                                                                                                                                                                                                                                                                                                                                                                                                                                                                                                                                                                                                                                                                                                                                                                                                                                                                                                                                                                                                                                                                                                                                                                                                                                                                                                                                                                                                                                                                                                                                                                                                                                                                                                                                                                                                                                                       | 729.8961                                      |          |   |   |   |          |         |         |   |          |         |         |    |          |         |          |    |          |         |          |    |          |          |          |   |          |          |         |   |          |         |         |   |          |         |          |   |          |          |          |   |         |         |          |   |         |          |         |   |         |          |         |   |         |          |          |   |         |         |          |   |         |         |          |   |         |          |          |   |         |         |          |   |         |         |         |   |         |          |         |   |         |          |         |   |         |         |          |   |         |          |         |   |         |          |         |   |         |          |          |   |         |         |         |   |         |          |          |                                                                                                                                                                                                                                                                                                                                                                                                                                                                                                                                                                                                                                                                                                                                                                                                                                                                                                                                                                                                                                                                                                                                                                                                                                                                                                                                                                                                                                                                                                                                                                                                                                                                         |         |         |         |          |          |          |          |          |          |          |          |          |          |          |          |          |          |          |          |          |          |          |          |          |          |          |          |          |          |          |          |           |           |           |           |           |           |           |           |           |           |           |           |           |           |           |           |           |           |           |           |           |           |           |           |           |           |           |           |           |           |           |           |           |           |           |           |           |           |           |           |           |
| 808.9482                                         | 840.8075                                                                                                                                                                                                                                                                                                                                                                                                                                                                                                                                                                                                                                                                                                                                                                                                                                                                                                                                                                                                                                                                                                                                                                                                                                                                                                                                                                                                                                                                                                                                                                                                                                                                                                                                                                                                                                                                                                                                                                                                                                                                       | 856.1165                                      |          |   |   |   |          |         |         |   |          |         |         |    |          |         |          |    |          |         |          |    |          |          |          |   |          |          |         |   |          |         |         |   |          |         |          |   |          |          |          |   |         |         |          |   |         |          |         |   |         |          |         |   |         |          |          |   |         |         |          |   |         |         |          |   |         |          |          |   |         |         |          |   |         |         |         |   |         |          |         |   |         |          |         |   |         |         |          |   |         |          |         |   |         |          |         |   |         |          |          |   |         |         |         |   |         |          |          |                                                                                                                                                                                                                                                                                                                                                                                                                                                                                                                                                                                                                                                                                                                                                                                                                                                                                                                                                                                                                                                                                                                                                                                                                                                                                                                                                                                                                                                                                                                                                                                                                                                                         |         |         |         |          |          |          |          |          |          |          |          |          |          |          |          |          |          |          |          |          |          |          |          |          |          |          |          |          |          |          |          |           |           |           |           |           |           |           |           |           |           |           |           |           |           |           |           |           |           |           |           |           |           |           |           |           |           |           |           |           |           |           |           |           |           |           |           |           |           |           |           |           |
| 909.1980                                         | 932.5675                                                                                                                                                                                                                                                                                                                                                                                                                                                                                                                                                                                                                                                                                                                                                                                                                                                                                                                                                                                                                                                                                                                                                                                                                                                                                                                                                                                                                                                                                                                                                                                                                                                                                                                                                                                                                                                                                                                                                                                                                                                                       | 942.8883                                      |          |   |   |   |          |         |         |   |          |         |         |    |          |         |          |    |          |         |          |    |          |          |          |   |          |          |         |   |          |         |         |   |          |         |          |   |          |          |          |   |         |         |          |   |         |          |         |   |         |          |         |   |         |          |          |   |         |         |          |   |         |         |          |   |         |          |          |   |         |         |          |   |         |         |         |   |         |          |         |   |         |          |         |   |         |         |          |   |         |          |         |   |         |          |         |   |         |          |          |   |         |         |         |   |         |          |          |                                                                                                                                                                                                                                                                                                                                                                                                                                                                                                                                                                                                                                                                                                                                                                                                                                                                                                                                                                                                                                                                                                                                                                                                                                                                                                                                                                                                                                                                                                                                                                                                                                                                         |         |         |         |          |          |          |          |          |          |          |          |          |          |          |          |          |          |          |          |          |          |          |          |          |          |          |          |          |          |          |          |           |           |           |           |           |           |           |           |           |           |           |           |           |           |           |           |           |           |           |           |           |           |           |           |           |           |           |           |           |           |           |           |           |           |           |           |           |           |           |           |           |
| 998.5301                                         | 1020.1122                                                                                                                                                                                                                                                                                                                                                                                                                                                                                                                                                                                                                                                                                                                                                                                                                                                                                                                                                                                                                                                                                                                                                                                                                                                                                                                                                                                                                                                                                                                                                                                                                                                                                                                                                                                                                                                                                                                                                                                                                                                                      | 1024.4254                                     |          |   |   |   |          |         |         |   |          |         |         |    |          |         |          |    |          |         |          |    |          |          |          |   |          |          |         |   |          |         |         |   |          |         |          |   |          |          |          |   |         |         |          |   |         |          |         |   |         |          |         |   |         |          |          |   |         |         |          |   |         |         |          |   |         |          |          |   |         |         |          |   |         |         |         |   |         |          |         |   |         |          |         |   |         |         |          |   |         |          |         |   |         |          |         |   |         |          |          |   |         |         |         |   |         |          |          |                                                                                                                                                                                                                                                                                                                                                                                                                                                                                                                                                                                                                                                                                                                                                                                                                                                                                                                                                                                                                                                                                                                                                                                                                                                                                                                                                                                                                                                                                                                                                                                                                                                                         |         |         |         |          |          |          |          |          |          |          |          |          |          |          |          |          |          |          |          |          |          |          |          |          |          |          |          |          |          |          |          |           |           |           |           |           |           |           |           |           |           |           |           |           |           |           |           |           |           |           |           |           |           |           |           |           |           |           |           |           |           |           |           |           |           |           |           |           |           |           |           |           |
| 1037.1275                                        | 1062.5034                                                                                                                                                                                                                                                                                                                                                                                                                                                                                                                                                                                                                                                                                                                                                                                                                                                                                                                                                                                                                                                                                                                                                                                                                                                                                                                                                                                                                                                                                                                                                                                                                                                                                                                                                                                                                                                                                                                                                                                                                                                                      | 1064.7485                                     |          |   |   |   |          |         |         |   |          |         |         |    |          |         |          |    |          |         |          |    |          |          |          |   |          |          |         |   |          |         |         |   |          |         |          |   |          |          |          |   |         |         |          |   |         |          |         |   |         |          |         |   |         |          |          |   |         |         |          |   |         |         |          |   |         |          |          |   |         |         |          |   |         |         |         |   |         |          |         |   |         |          |         |   |         |         |          |   |         |          |         |   |         |          |         |   |         |          |          |   |         |         |         |   |         |          |          |                                                                                                                                                                                                                                                                                                                                                                                                                                                                                                                                                                                                                                                                                                                                                                                                                                                                                                                                                                                                                                                                                                                                                                                                                                                                                                                                                                                                                                                                                                                                                                                                                                                                         |         |         |         |          |          |          |          |          |          |          |          |          |          |          |          |          |          |          |          |          |          |          |          |          |          |          |          |          |          |          |          |           |           |           |           |           |           |           |           |           |           |           |           |           |           |           |           |           |           |           |           |           |           |           |           |           |           |           |           |           |           |           |           |           |           |           |           |           |           |           |           |           |
| 1073.7255                                        | 1114.8585                                                                                                                                                                                                                                                                                                                                                                                                                                                                                                                                                                                                                                                                                                                                                                                                                                                                                                                                                                                                                                                                                                                                                                                                                                                                                                                                                                                                                                                                                                                                                                                                                                                                                                                                                                                                                                                                                                                                                                                                                                                                      | 1157.8466                                     |          |   |   |   |          |         |         |   |          |         |         |    |          |         |          |    |          |         |          |    |          |          |          |   |          |          |         |   |          |         |         |   |          |         |          |   |          |          |          |   |         |         |          |   |         |          |         |   |         |          |         |   |         |          |          |   |         |         |          |   |         |         |          |   |         |          |          |   |         |         |          |   |         |         |         |   |         |          |         |   |         |          |         |   |         |         |          |   |         |          |         |   |         |          |         |   |         |          |          |   |         |         |         |   |         |          |          |                                                                                                                                                                                                                                                                                                                                                                                                                                                                                                                                                                                                                                                                                                                                                                                                                                                                                                                                                                                                                                                                                                                                                                                                                                                                                                                                                                                                                                                                                                                                                                                                                                                                         |         |         |         |          |          |          |          |          |          |          |          |          |          |          |          |          |          |          |          |          |          |          |          |          |          |          |          |          |          |          |          |           |           |           |           |           |           |           |           |           |           |           |           |           |           |           |           |           |           |           |           |           |           |           |           |           |           |           |           |           |           |           |           |           |           |           |           |           |           |           |           |           |
| 1182.7634                                        | 1196.7660                                                                                                                                                                                                                                                                                                                                                                                                                                                                                                                                                                                                                                                                                                                                                                                                                                                                                                                                                                                                                                                                                                                                                                                                                                                                                                                                                                                                                                                                                                                                                                                                                                                                                                                                                                                                                                                                                                                                                                                                                                                                      | 1224.1078                                     |          |   |   |   |          |         |         |   |          |         |         |    |          |         |          |    |          |         |          |    |          |          |          |   |          |          |         |   |          |         |         |   |          |         |          |   |          |          |          |   |         |         |          |   |         |          |         |   |         |          |         |   |         |          |          |   |         |         |          |   |         |         |          |   |         |          |          |   |         |         |          |   |         |         |         |   |         |          |         |   |         |          |         |   |         |         |          |   |         |          |         |   |         |          |         |   |         |          |          |   |         |         |         |   |         |          |          |                                                                                                                                                                                                                                                                                                                                                                                                                                                                                                                                                                                                                                                                                                                                                                                                                                                                                                                                                                                                                                                                                                                                                                                                                                                                                                                                                                                                                                                                                                                                                                                                                                                                         |         |         |         |          |          |          |          |          |          |          |          |          |          |          |          |          |          |          |          |          |          |          |          |          |          |          |          |          |          |          |          |           |           |           |           |           |           |           |           |           |           |           |           |           |           |           |           |           |           |           |           |           |           |           |           |           |           |           |           |           |           |           |           |           |           |           |           |           |           |           |           |           |
| 1242.3597                                        | 1249.0395                                                                                                                                                                                                                                                                                                                                                                                                                                                                                                                                                                                                                                                                                                                                                                                                                                                                                                                                                                                                                                                                                                                                                                                                                                                                                                                                                                                                                                                                                                                                                                                                                                                                                                                                                                                                                                                                                                                                                                                                                                                                      | 1263.8464                                     |          |   |   |   |          |         |         |   |          |         |         |    |          |         |          |    |          |         |          |    |          |          |          |   |          |          |         |   |          |         |         |   |          |         |          |   |          |          |          |   |         |         |          |   |         |          |         |   |         |          |         |   |         |          |          |   |         |         |          |   |         |         |          |   |         |          |          |   |         |         |          |   |         |         |         |   |         |          |         |   |         |          |         |   |         |         |          |   |         |          |         |   |         |          |         |   |         |          |          |   |         |         |         |   |         |          |          |                                                                                                                                                                                                                                                                                                                                                                                                                                                                                                                                                                                                                                                                                                                                                                                                                                                                                                                                                                                                                                                                                                                                                                                                                                                                                                                                                                                                                                                                                                                                                                                                                                                                         |         |         |         |          |          |          |          |          |          |          |          |          |          |          |          |          |          |          |          |          |          |          |          |          |          |          |          |          |          |          |          |           |           |           |           |           |           |           |           |           |           |           |           |           |           |           |           |           |           |           |           |           |           |           |           |           |           |           |           |           |           |           |           |           |           |           |           |           |           |           |           |           |
| 1317.9675                                        | 1329.3950                                                                                                                                                                                                                                                                                                                                                                                                                                                                                                                                                                                                                                                                                                                                                                                                                                                                                                                                                                                                                                                                                                                                                                                                                                                                                                                                                                                                                                                                                                                                                                                                                                                                                                                                                                                                                                                                                                                                                                                                                                                                      | 1337.6499                                     |          |   |   |   |          |         |         |   |          |         |         |    |          |         |          |    |          |         |          |    |          |          |          |   |          |          |         |   |          |         |         |   |          |         |          |   |          |          |          |   |         |         |          |   |         |          |         |   |         |          |         |   |         |          |          |   |         |         |          |   |         |         |          |   |         |          |          |   |         |         |          |   |         |         |         |   |         |          |         |   |         |          |         |   |         |         |          |   |         |          |         |   |         |          |         |   |         |          |          |   |         |         |         |   |         |          |          |                                                                                                                                                                                                                                                                                                                                                                                                                                                                                                                                                                                                                                                                                                                                                                                                                                                                                                                                                                                                                                                                                                                                                                                                                                                                                                                                                                                                                                                                                                                                                                                                                                                                         |         |         |         |          |          |          |          |          |          |          |          |          |          |          |          |          |          |          |          |          |          |          |          |          |          |          |          |          |          |          |          |           |           |           |           |           |           |           |           |           |           |           |           |           |           |           |           |           |           |           |           |           |           |           |           |           |           |           |           |           |           |           |           |           |           |           |           |           |           |           |           |           |
| 1353.5997                                        | 1362.5839                                                                                                                                                                                                                                                                                                                                                                                                                                                                                                                                                                                                                                                                                                                                                                                                                                                                                                                                                                                                                                                                                                                                                                                                                                                                                                                                                                                                                                                                                                                                                                                                                                                                                                                                                                                                                                                                                                                                                                                                                                                                      | 1435.6921                                     |          |   |   |   |          |         |         |   |          |         |         |    |          |         |          |    |          |         |          |    |          |          |          |   |          |          |         |   |          |         |         |   |          |         |          |   |          |          |          |   |         |         |          |   |         |          |         |   |         |          |         |   |         |          |          |   |         |         |          |   |         |         |          |   |         |          |          |   |         |         |          |   |         |         |         |   |         |          |         |   |         |          |         |   |         |         |          |   |         |          |         |   |         |          |         |   |         |          |          |   |         |         |         |   |         |          |          |                                                                                                                                                                                                                                                                                                                                                                                                                                                                                                                                                                                                                                                                                                                                                                                                                                                                                                                                                                                                                                                                                                                                                                                                                                                                                                                                                                                                                                                                                                                                                                                                                                                                         |         |         |         |          |          |          |          |          |          |          |          |          |          |          |          |          |          |          |          |          |          |          |          |          |          |          |          |          |          |          |          |           |           |           |           |           |           |           |           |           |           |           |           |           |           |           |           |           |           |           |           |           |           |           |           |           |           |           |           |           |           |           |           |           |           |           |           |           |           |           |           |           |
| 1460.8468                                        | 1468.1914                                                                                                                                                                                                                                                                                                                                                                                                                                                                                                                                                                                                                                                                                                                                                                                                                                                                                                                                                                                                                                                                                                                                                                                                                                                                                                                                                                                                                                                                                                                                                                                                                                                                                                                                                                                                                                                                                                                                                                                                                                                                      | 1479.9313                                     |          |   |   |   |          |         |         |   |          |         |         |    |          |         |          |    |          |         |          |    |          |          |          |   |          |          |         |   |          |         |         |   |          |         |          |   |          |          |          |   |         |         |          |   |         |          |         |   |         |          |         |   |         |          |          |   |         |         |          |   |         |         |          |   |         |          |          |   |         |         |          |   |         |         |         |   |         |          |         |   |         |          |         |   |         |         |          |   |         |          |         |   |         |          |         |   |         |          |          |   |         |         |         |   |         |          |          |                                                                                                                                                                                                                                                                                                                                                                                                                                                                                                                                                                                                                                                                                                                                                                                                                                                                                                                                                                                                                                                                                                                                                                                                                                                                                                                                                                                                                                                                                                                                                                                                                                                                         |         |         |         |          |          |          |          |          |          |          |          |          |          |          |          |          |          |          |          |          |          |          |          |          |          |          |          |          |          |          |          |           |           |           |           |           |           |           |           |           |           |           |           |           |           |           |           |           |           |           |           |           |           |           |           |           |           |           |           |           |           |           |           |           |           |           |           |           |           |           |           |           |
| 1507.2908                                        | 1519.8560                                                                                                                                                                                                                                                                                                                                                                                                                                                                                                                                                                                                                                                                                                                                                                                                                                                                                                                                                                                                                                                                                                                                                                                                                                                                                                                                                                                                                                                                                                                                                                                                                                                                                                                                                                                                                                                                                                                                                                                                                                                                      | 1654.5929                                     |          |   |   |   |          |         |         |   |          |         |         |    |          |         |          |    |          |         |          |    |          |          |          |   |          |          |         |   |          |         |         |   |          |         |          |   |          |          |          |   |         |         |          |   |         |          |         |   |         |          |         |   |         |          |          |   |         |         |          |   |         |         |          |   |         |          |          |   |         |         |          |   |         |         |         |   |         |          |         |   |         |          |         |   |         |         |          |   |         |          |         |   |         |          |         |   |         |          |          |   |         |         |         |   |         |          |          |                                                                                                                                                                                                                                                                                                                                                                                                                                                                                                                                                                                                                                                                                                                                                                                                                                                                                                                                                                                                                                                                                                                                                                                                                                                                                                                                                                                                                                                                                                                                                                                                                                                                         |         |         |         |          |          |          |          |          |          |          |          |          |          |          |          |          |          |          |          |          |          |          |          |          |          |          |          |          |          |          |          |           |           |           |           |           |           |           |           |           |           |           |           |           |           |           |           |           |           |           |           |           |           |           |           |           |           |           |           |           |           |           |           |           |           |           |           |           |           |           |           |           |
| 1700.4605                                        | 2265.0968                                                                                                                                                                                                                                                                                                                                                                                                                                                                                                                                                                                                                                                                                                                                                                                                                                                                                                                                                                                                                                                                                                                                                                                                                                                                                                                                                                                                                                                                                                                                                                                                                                                                                                                                                                                                                                                                                                                                                                                                                                                                      | 2970.3687                                     |          |   |   |   |          |         |         |   |          |         |         |    |          |         |          |    |          |         |          |    |          |          |          |   |          |          |         |   |          |         |         |   |          |         |          |   |          |          |          |   |         |         |          |   |         |          |         |   |         |          |         |   |         |          |          |   |         |         |          |   |         |         |          |   |         |          |          |   |         |         |          |   |         |         |         |   |         |          |         |   |         |          |         |   |         |         |          |   |         |          |         |   |         |          |         |   |         |          |          |   |         |         |         |   |         |          |          |                                                                                                                                                                                                                                                                                                                                                                                                                                                                                                                                                                                                                                                                                                                                                                                                                                                                                                                                                                                                                                                                                                                                                                                                                                                                                                                                                                                                                                                                                                                                                                                                                                                                         |         |         |         |          |          |          |          |          |          |          |          |          |          |          |          |          |          |          |          |          |          |          |          |          |          |          |          |          |          |          |          |           |           |           |           |           |           |           |           |           |           |           |           |           |           |           |           |           |           |           |           |           |           |           |           |           |           |           |           |           |           |           |           |           |           |           |           |           |           |           |           |           |
| 3058.6526                                        | 3084.2336                                                                                                                                                                                                                                                                                                                                                                                                                                                                                                                                                                                                                                                                                                                                                                                                                                                                                                                                                                                                                                                                                                                                                                                                                                                                                                                                                                                                                                                                                                                                                                                                                                                                                                                                                                                                                                                                                                                                                                                                                                                                      | 3086.6986                                     |          |   |   |   |          |         |         |   |          |         |         |    |          |         |          |    |          |         |          |    |          |          |          |   |          |          |         |   |          |         |         |   |          |         |          |   |          |          |          |   |         |         |          |   |         |          |         |   |         |          |         |   |         |          |          |   |         |         |          |   |         |         |          |   |         |          |          |   |         |         |          |   |         |         |         |   |         |          |         |   |         |          |         |   |         |         |          |   |         |          |         |   |         |          |         |   |         |          |          |   |         |         |         |   |         |          |          |                                                                                                                                                                                                                                                                                                                                                                                                                                                                                                                                                                                                                                                                                                                                                                                                                                                                                                                                                                                                                                                                                                                                                                                                                                                                                                                                                                                                                                                                                                                                                                                                                                                                         |         |         |         |          |          |          |          |          |          |          |          |          |          |          |          |          |          |          |          |          |          |          |          |          |          |          |          |          |          |          |          |           |           |           |           |           |           |           |           |           |           |           |           |           |           |           |           |           |           |           |           |           |           |           |           |           |           |           |           |           |           |           |           |           |           |           |           |           |           |           |           |           |
| 3103.6347                                        | 3152.4270                                                                                                                                                                                                                                                                                                                                                                                                                                                                                                                                                                                                                                                                                                                                                                                                                                                                                                                                                                                                                                                                                                                                                                                                                                                                                                                                                                                                                                                                                                                                                                                                                                                                                                                                                                                                                                                                                                                                                                                                                                                                      | 3152.4674                                     |          |   |   |   |          |         |         |   |          |         |         |    |          |         |          |    |          |         |          |    |          |          |          |   |          |          |         |   |          |         |         |   |          |         |          |   |          |          |          |   |         |         |          |   |         |          |         |   |         |          |         |   |         |          |          |   |         |         |          |   |         |         |          |   |         |          |          |   |         |         |          |   |         |         |         |   |         |          |         |   |         |          |         |   |         |         |          |   |         |          |         |   |         |          |         |   |         |          |          |   |         |         |         |   |         |          |          |                                                                                                                                                                                                                                                                                                                                                                                                                                                                                                                                                                                                                                                                                                                                                                                                                                                                                                                                                                                                                                                                                                                                                                                                                                                                                                                                                                                                                                                                                                                                                                                                                                                                         |         |         |         |          |          |          |          |          |          |          |          |          |          |          |          |          |          |          |          |          |          |          |          |          |          |          |          |          |          |          |          |           |           |           |           |           |           |           |           |           |           |           |           |           |           |           |           |           |           |           |           |           |           |           |           |           |           |           |           |           |           |           |           |           |           |           |           |           |           |           |           |           |
| 3166.0662                                        | 3172.4670                                                                                                                                                                                                                                                                                                                                                                                                                                                                                                                                                                                                                                                                                                                                                                                                                                                                                                                                                                                                                                                                                                                                                                                                                                                                                                                                                                                                                                                                                                                                                                                                                                                                                                                                                                                                                                                                                                                                                                                                                                                                      | 3176.7214                                     |          |   |   |   |          |         |         |   |          |         |         |    |          |         |          |    |          |         |          |    |          |          |          |   |          |          |         |   |          |         |         |   |          |         |          |   |          |          |          |   |         |         |          |   |         |          |         |   |         |          |         |   |         |          |          |   |         |         |          |   |         |         |          |   |         |          |          |   |         |         |          |   |         |         |         |   |         |          |         |   |         |          |         |   |         |         |          |   |         |          |         |   |         |          |         |   |         |          |          |   |         |         |         |   |         |          |          |                                                                                                                                                                                                                                                                                                                                                                                                                                                                                                                                                                                                                                                                                                                                                                                                                                                                                                                                                                                                                                                                                                                                                                                                                                                                                                                                                                                                                                                                                                                                                                                                                                                                         |         |         |         |          |          |          |          |          |          |          |          |          |          |          |          |          |          |          |          |          |          |          |          |          |          |          |          |          |          |          |          |           |           |           |           |           |           |           |           |           |           |           |           |           |           |           |           |           |           |           |           |           |           |           |           |           |           |           |           |           |           |           |           |           |           |           |           |           |           |           |           |           |
| 3191.7180                                        | 3269.5847                                                                                                                                                                                                                                                                                                                                                                                                                                                                                                                                                                                                                                                                                                                                                                                                                                                                                                                                                                                                                                                                                                                                                                                                                                                                                                                                                                                                                                                                                                                                                                                                                                                                                                                                                                                                                                                                                                                                                                                                                                                                      | 3294.7091                                     |          |   |   |   |          |         |         |   |          |         |         |    |          |         |          |    |          |         |          |    |          |          |          |   |          |          |         |   |          |         |         |   |          |         |          |   |          |          |          |   |         |         |          |   |         |          |         |   |         |          |         |   |         |          |          |   |         |         |          |   |         |         |          |   |         |          |          |   |         |         |          |   |         |         |         |   |         |          |         |   |         |          |         |   |         |         |          |   |         |          |         |   |         |          |         |   |         |          |          |   |         |         |         |   |         |          |          |                                                                                                                                                                                                                                                                                                                                                                                                                                                                                                                                                                                                                                                                                                                                                                                                                                                                                                                                                                                                                                                                                                                                                                                                                                                                                                                                                                                                                                                                                                                                                                                                                                                                         |         |         |         |          |          |          |          |          |          |          |          |          |          |          |          |          |          |          |          |          |          |          |          |          |          |          |          |          |          |          |          |           |           |           |           |           |           |           |           |           |           |           |           |           |           |           |           |           |           |           |           |           |           |           |           |           |           |           |           |           |           |           |           |           |           |           |           |           |           |           |           |           |
| <b><u>Statistical Thermodynamic Analysis</u></b> |                                                                                                                                                                                                                                                                                                                                                                                                                                                                                                                                                                                                                                                                                                                                                                                                                                                                                                                                                                                                                                                                                                                                                                                                                                                                                                                                                                                                                                                                                                                                                                                                                                                                                                                                                                                                                                                                                                                                                                                                                                                                                |                                               |          |   |   |   |          |         |         |   |          |         |         |    |          |         |          |    |          |         |          |    |          |          |          |   |          |          |         |   |          |         |         |   |          |         |          |   |          |          |          |   |         |         |          |   |         |          |         |   |         |          |         |   |         |          |          |   |         |         |          |   |         |         |          |   |         |          |          |   |         |         |          |   |         |         |         |   |         |          |         |   |         |          |         |   |         |         |          |   |         |          |         |   |         |          |         |   |         |          |          |   |         |         |         |   |         |          |          |                                                                                                                                                                                                                                                                                                                                                                                                                                                                                                                                                                                                                                                                                                                                                                                                                                                                                                                                                                                                                                                                                                                                                                                                                                                                                                                                                                                                                                                                                                                                                                                                                                                                         |         |         |         |          |          |          |          |          |          |          |          |          |          |          |          |          |          |          |          |          |          |          |          |          |          |          |          |          |          |          |          |           |           |           |           |           |           |           |           |           |           |           |           |           |           |           |           |           |           |           |           |           |           |           |           |           |           |           |           |           |           |           |           |           |           |           |           |           |           |           |           |           |
| Temperature=298.15 K                             |                                                                                                                                                                                                                                                                                                                                                                                                                                                                                                                                                                                                                                                                                                                                                                                                                                                                                                                                                                                                                                                                                                                                                                                                                                                                                                                                                                                                                                                                                                                                                                                                                                                                                                                                                                                                                                                                                                                                                                                                                                                                                | Pressure=1 atm                                |          |   |   |   |          |         |         |   |          |         |         |    |          |         |          |    |          |         |          |    |          |          |          |   |          |          |         |   |          |         |         |   |          |         |          |   |          |          |          |   |         |         |          |   |         |          |         |   |         |          |         |   |         |          |          |   |         |         |          |   |         |         |          |   |         |          |          |   |         |         |          |   |         |         |         |   |         |          |         |   |         |          |         |   |         |         |          |   |         |          |         |   |         |          |         |   |         |          |          |   |         |         |         |   |         |          |          |                                                                                                                                                                                                                                                                                                                                                                                                                                                                                                                                                                                                                                                                                                                                                                                                                                                                                                                                                                                                                                                                                                                                                                                                                                                                                                                                                                                                                                                                                                                                                                                                                                                                         |         |         |         |          |          |          |          |          |          |          |          |          |          |          |          |          |          |          |          |          |          |          |          |          |          |          |          |          |          |          |          |           |           |           |           |           |           |           |           |           |           |           |           |           |           |           |           |           |           |           |           |           |           |           |           |           |           |           |           |           |           |           |           |           |           |           |           |           |           |           |           |           |
| Zero-point correction= 0.208462                  |                                                                                                                                                                                                                                                                                                                                                                                                                                                                                                                                                                                                                                                                                                                                                                                                                                                                                                                                                                                                                                                                                                                                                                                                                                                                                                                                                                                                                                                                                                                                                                                                                                                                                                                                                                                                                                                                                                                                                                                                                                                                                | Electronic Energy = -1427.70544006            |          |   |   |   |          |         |         |   |          |         |         |    |          |         |          |    |          |         |          |    |          |          |          |   |          |          |         |   |          |         |         |   |          |         |          |   |          |          |          |   |         |         |          |   |         |          |         |   |         |          |         |   |         |          |          |   |         |         |          |   |         |         |          |   |         |          |          |   |         |         |          |   |         |         |         |   |         |          |         |   |         |          |         |   |         |         |          |   |         |          |         |   |         |          |         |   |         |          |          |   |         |         |         |   |         |          |          |                                                                                                                                                                                                                                                                                                                                                                                                                                                                                                                                                                                                                                                                                                                                                                                                                                                                                                                                                                                                                                                                                                                                                                                                                                                                                                                                                                                                                                                                                                                                                                                                                                                                         |         |         |         |          |          |          |          |          |          |          |          |          |          |          |          |          |          |          |          |          |          |          |          |          |          |          |          |          |          |          |          |           |           |           |           |           |           |           |           |           |           |           |           |           |           |           |           |           |           |           |           |           |           |           |           |           |           |           |           |           |           |           |           |           |           |           |           |           |           |           |           |           |
| Internal Energy (E)= -1427.48187806              |                                                                                                                                                                                                                                                                                                                                                                                                                                                                                                                                                                                                                                                                                                                                                                                                                                                                                                                                                                                                                                                                                                                                                                                                                                                                                                                                                                                                                                                                                                                                                                                                                                                                                                                                                                                                                                                                                                                                                                                                                                                                                | Enthalpy (H)= -1427.48093406                  |          |   |   |   |          |         |         |   |          |         |         |    |          |         |          |    |          |         |          |    |          |          |          |   |          |          |         |   |          |         |         |   |          |         |          |   |          |          |          |   |         |         |          |   |         |          |         |   |         |          |         |   |         |          |          |   |         |         |          |   |         |         |          |   |         |          |          |   |         |         |          |   |         |         |         |   |         |          |         |   |         |          |         |   |         |         |          |   |         |          |         |   |         |          |         |   |         |          |          |   |         |         |         |   |         |          |          |                                                                                                                                                                                                                                                                                                                                                                                                                                                                                                                                                                                                                                                                                                                                                                                                                                                                                                                                                                                                                                                                                                                                                                                                                                                                                                                                                                                                                                                                                                                                                                                                                                                                         |         |         |         |          |          |          |          |          |          |          |          |          |          |          |          |          |          |          |          |          |          |          |          |          |          |          |          |          |          |          |          |           |           |           |           |           |           |           |           |           |           |           |           |           |           |           |           |           |           |           |           |           |           |           |           |           |           |           |           |           |           |           |           |           |           |           |           |           |           |           |           |           |
| Gibbs Free Energy (G)=-1427.54141406             |                                                                                                                                                                                                                                                                                                                                                                                                                                                                                                                                                                                                                                                                                                                                                                                                                                                                                                                                                                                                                                                                                                                                                                                                                                                                                                                                                                                                                                                                                                                                                                                                                                                                                                                                                                                                                                                                                                                                                                                                                                                                                | Gibbs Free Energy of Solvation=-1427.57518482 |          |   |   |   |          |         |         |   |          |         |         |    |          |         |          |    |          |         |          |    |          |          |          |   |          |          |         |   |          |         |         |   |          |         |          |   |          |          |          |   |         |         |          |   |         |          |         |   |         |          |         |   |         |          |          |   |         |         |          |   |         |         |          |   |         |          |          |   |         |         |          |   |         |         |         |   |         |          |         |   |         |          |         |   |         |         |          |   |         |          |         |   |         |          |         |   |         |          |          |   |         |         |         |   |         |          |          |                                                                                                                                                                                                                                                                                                                                                                                                                                                                                                                                                                                                                                                                                                                                                                                                                                                                                                                                                                                                                                                                                                                                                                                                                                                                                                                                                                                                                                                                                                                                                                                                                                                                         |         |         |         |          |          |          |          |          |          |          |          |          |          |          |          |          |          |          |          |          |          |          |          |          |          |          |          |          |          |          |          |           |           |           |           |           |           |           |           |           |           |           |           |           |           |           |           |           |           |           |           |           |           |           |           |           |           |           |           |           |           |           |           |           |           |           |           |           |           |           |           |           |



| St.Pt.                                           | General Structure                                                                 | Ball & Stick model                                                                 |                                               |           |           |           |
|--------------------------------------------------|-----------------------------------------------------------------------------------|------------------------------------------------------------------------------------|-----------------------------------------------|-----------|-----------|-----------|
| 1MTS <sub>5</sub>                                | 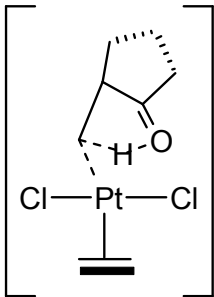 |  |                                               |           |           |           |
| <b><u>Cartesian co-ordinate</u></b>              |                                                                                   | <b><u>Frequencies</u></b>                                                          |                                               |           |           |           |
| -----<br>Atoms                                   | X                                                                                 | Y                                                                                  | Z                                             | -----     | -----     | -----     |
| -----                                            | -----                                                                             | -----                                                                              | -----                                         | -----     | -----     | -----     |
| C                                                | -3.08198                                                                          | -0.79470                                                                           | 0.16994                                       | -797.8640 | 37.6732   | 61.3710   |
| C                                                | -2.70392                                                                          | -0.75151                                                                           | -1.14526                                      | 74.2994   | 93.7218   | 117.9403  |
| Pt                                               | -0.92960                                                                          | -0.00411                                                                           | 0.11253                                       | 122.9703  | 139.8294  | 149.1610  |
| Cl                                               | -0.15018                                                                          | -2.23112                                                                           | 0.33518                                       | 164.6739  | 169.0789  | 208.9362  |
| Cl                                               | -1.74607                                                                          | 2.19440                                                                            | -0.08006                                      | 246.9510  | 259.3560  | 314.6470  |
| H                                                | -2.93534                                                                          | 0.11268                                                                            | -1.75981                                      | 316.2879  | 331.3267  | 394.7891  |
| H                                                | -2.29379                                                                          | -1.63084                                                                           | -1.63219                                      | 458.8111  | 563.9340  | 574.0099  |
| H                                                | -2.98450                                                                          | -1.71333                                                                           | 0.74037                                       | 601.2474  | 607.2156  | 617.9457  |
| H                                                | -3.62490                                                                          | 0.03456                                                                            | 0.61332                                       | 739.3761  | 793.3962  | 831.4634  |
| C                                                | 2.24594                                                                           | 0.06746                                                                            | 0.60076                                       | 853.0058  | 901.8242  | 926.6706  |
| O                                                | 1.65613                                                                           | 0.20210                                                                            | -1.70405                                      | 968.3645  | 970.7779  | 1019.2615 |
| C                                                | 2.53670                                                                           | 0.02292                                                                            | -0.88292                                      | 1034.0027 | 1050.3920 | 1056.4726 |
| C                                                | 0.94061                                                                           | 0.80041                                                                            | 0.81507                                       | 1061.9244 | 1092.4447 | 1150.5355 |
| H                                                | 2.14850                                                                           | -0.97642                                                                           | 0.93329                                       | 1178.9820 | 1188.5168 | 1199.7497 |
| H                                                | 0.57829                                                                           | 0.68377                                                                            | 1.84271                                       | 1213.6986 | 1235.7513 | 1239.4969 |
| H                                                | 1.01186                                                                           | 1.86683                                                                            | 0.58921                                       | 1297.2575 | 1315.3759 | 1325.2248 |
| C                                                | 3.55569                                                                           | 0.65499                                                                            | 1.14625                                       | 1338.9645 | 1347.9983 | 1382.7758 |
| C                                                | 4.62987                                                                           | -0.04172                                                                           | 0.28206                                       | 1392.2271 | 1454.3502 | 1461.9568 |
| C                                                | 4.02113                                                                           | -0.09833                                                                           | -1.13245                                      | 1472.2297 | 1505.2211 | 1518.7852 |
| H                                                | 0.51568                                                                           | 0.40914                                                                            | -0.63492                                      | 1620.1984 | 1876.7809 | 3066.4682 |
| H                                                | 3.68949                                                                           | 0.47630                                                                            | 2.21426                                       | 3077.9152 | 3087.6682 | 3098.0556 |
| H                                                | 4.31977                                                                           | 0.75264                                                                            | -1.75370                                      | 3102.2443 | 3150.9150 | 3157.2547 |
| H                                                | 4.24961                                                                           | -1.00659                                                                           | -1.69556                                      | 3163.1034 | 3164.6624 | 3177.1748 |
| H                                                | 5.58787                                                                           | 0.47971                                                                            | 0.30361                                       | 3186.7400 | 3276.9018 | 3295.9441 |
| H                                                | 4.79482                                                                           | -1.05584                                                                           | 0.65802                                       |           |           |           |
| H                                                | 3.57437                                                                           | 1.73876                                                                            | 0.97843                                       |           |           |           |
| <b><u>Statistical Thermodynamic Analysis</u></b> |                                                                                   |                                                                                    |                                               |           |           |           |
| Temperature=298.15 K                             |                                                                                   |                                                                                    | Pressure=1 atm                                |           |           |           |
| Zero-point correction= 0.204230                  |                                                                                   |                                                                                    | Electronic Energy = -1427.67847823            |           |           |           |
| Internal Energy (E)= -1427.45930323              |                                                                                   |                                                                                    | Enthalpy (H)= -1427.45835823                  |           |           |           |
| Gibbs Free Energy (G)=-1427.51830023             |                                                                                   |                                                                                    | Gibbs Free Energy of Solvation=-1427.55271722 |           |           |           |

| St.Pt.                                           | General Structure                                                                 | Ball & Stick model                                                                 |                                               |           |           |           |
|--------------------------------------------------|-----------------------------------------------------------------------------------|------------------------------------------------------------------------------------|-----------------------------------------------|-----------|-----------|-----------|
| 1Ml <sub>6</sub>                                 | 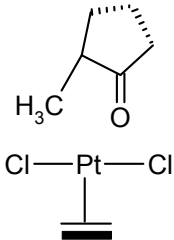 |  |                                               |           |           |           |
| <b><u>Cartesian co-ordinate</u></b>              |                                                                                   | <b><u>Frequencies</u></b>                                                          |                                               |           |           |           |
| -----<br>Atoms                                   | X                                                                                 | Y                                                                                  | Z                                             | -----     | -----     | -----     |
| -----                                            | -----                                                                             | -----                                                                              | -----                                         | -----     | -----     | -----     |
| C                                                | 2.54011                                                                           | 0.51562                                                                            | 1.14850                                       | -29.1370  | 39.5378   | 59.8395   |
| C                                                | 2.97692                                                                           | 0.57889                                                                            | -0.18173                                      | 64.1790   | 102.7749  | 122.6731  |
| Pt                                               | 0.93946                                                                           | 0.02723                                                                            | -0.13795                                      | 140.0231  | 154.1497  | 158.0115  |
| Cl                                               | 0.25908                                                                           | 2.29279                                                                            | -0.21269                                      | 169.1246  | 190.8933  | 211.6602  |
| Cl                                               | 1.50884                                                                           | -2.24772                                                                           | -0.02023                                      | 232.3615  | 287.2370  | 315.4800  |
| H                                                | 3.52129                                                                           | -0.25416                                                                           | -0.61453                                      | 332.7439  | 356.8316  | 418.7252  |
| H                                                | 3.03539                                                                           | 1.53649                                                                            | -0.68916                                      | 508.3569  | 526.2287  | 559.5001  |
| H                                                | 2.26561                                                                           | 1.42597                                                                            | 1.67183                                       | 567.8855  | 641.7342  | 744.7820  |
| H                                                | 2.75072                                                                           | -0.36563                                                                           | 1.74584                                       | 788.5839  | 838.8024  | 842.8045  |
| C                                                | -2.45961                                                                          | 0.20005                                                                            | 0.87102                                       | 867.8801  | 916.1053  | 955.2972  |
| O                                                | -0.98665                                                                          | -0.51372                                                                           | -0.95798                                      | 975.4025  | 993.8789  | 1025.5958 |
| C                                                | -2.10810                                                                          | -0.31359                                                                           | -0.50831                                      | 1033.1121 | 1073.6559 | 1085.6280 |
| C                                                | -1.65875                                                                          | -0.42812                                                                           | 2.00880                                       | 1087.3798 | 1164.3012 | 1195.5036 |
| H                                                | -2.23624                                                                          | 1.27792                                                                            | 0.81866                                       | 1205.7517 | 1216.0815 | 1230.0987 |
| H                                                | -0.60785                                                                          | -0.12832                                                                           | 1.98278                                       | 1248.9099 | 1287.7451 | 1300.4817 |
| H                                                | -2.07266                                                                          | -0.10210                                                                           | 2.96617                                       | 1248.9099 | 1287.7451 | 1300.4817 |
| C                                                | -3.98082                                                                          | -0.01160                                                                           | 0.94266                                       | 1320.3627 | 1332.4741 | 1355.3398 |
| C                                                | -4.45958                                                                          | 0.13711                                                                            | -0.50997                                      | 1375.7051 | 1422.1715 | 1451.1740 |
| C                                                | -3.35906                                                                          | -0.56457                                                                           | -1.31444                                      | 1465.2762 | 1494.7728 | 1505.3169 |
| H                                                | -1.70274                                                                          | -1.52012                                                                           | 1.96503                                       | 1509.7263 | 1521.2891 | 1572.1556 |
| H                                                | -4.46329                                                                          | 0.68657                                                                            | 1.62920                                       | 1826.2424 | 3048.5768 | 3067.7680 |
| H                                                | -3.51058                                                                          | -1.65252                                                                           | -1.31986                                      | 3073.7803 | 3077.0698 | 3103.6375 |
| H                                                | -3.23047                                                                          | -0.24425                                                                           | -2.34966                                      | 3153.4866 | 3158.1993 | 3159.9605 |
| H                                                | -5.44821                                                                          | -0.29138                                                                           | -0.68077                                      | 3161.7996 | 3170.8148 | 3179.1905 |
| H                                                | -4.50053                                                                          | 1.19637                                                                            | -0.78304                                      | 3181.7342 | 3275.3827 | 3290.0219 |
| H                                                | -4.18621                                                                          | -1.02790                                                                           | 1.30183                                       |           |           |           |
| <b><u>Statistical Thermodynamic Analysis</u></b> |                                                                                   |                                                                                    |                                               |           |           |           |
| Temperature=298.15 K                             |                                                                                   |                                                                                    | Pressure=1 atm                                |           |           |           |
| Zero-point correction= 0.210710                  |                                                                                   |                                                                                    | Electronic Energy = -1427.74422573            |           |           |           |
| Internal Energy (E)= -1427.51893773              |                                                                                   |                                                                                    | Enthalpy (H)= -1427.51799373                  |           |           |           |
| Gibbs Free Energy (G)=-1427.57712473             |                                                                                   |                                                                                    | Gibbs Free Energy of Solvation=-1427.61092709 |           |           |           |

| St.Pt.                                           | General Structure | Ball & Stick model        |                                               |           |           |           |
|--------------------------------------------------|-------------------|---------------------------|-----------------------------------------------|-----------|-----------|-----------|
| 1MI <sub>5a</sub>                                |                   |                           |                                               |           |           |           |
| <b><u>Cartesian co-ordinate</u></b>              |                   | <b><u>Frequencies</u></b> |                                               |           |           |           |
| -----<br>Atoms                                   | X                 | Y                         | Z                                             |           |           |           |
| -----                                            |                   |                           |                                               |           |           |           |
| C                                                | 2.88457           | -0.51067                  | 0.78965                                       | 46.3161   | 58.0919   | 81.2575   |
| C                                                | 2.02255           | -0.30722                  | 1.81884                                       | 105.1335  | 115.5536  | 130.0877  |
| Pt                                               | 0.75537           | -0.10999                  | -0.19098                                      | 138.2714  | 147.7221  | 166.8671  |
| Cl                                               | 0.23591           | -2.40128                  | -0.09824                                      | 185.5868  | 195.7427  | 228.2991  |
| Cl                                               | 1.11420           | 2.31068                   | -0.25897                                      | 265.8332  | 309.7091  | 317.2220  |
| H                                                | 1.90900           | 0.67571                   | 2.26546                                       | 362.2554  | 402.8128  | 471.4490  |
| H                                                | 1.52499           | -1.14338                  | 2.29932                                       | 524.6697  | 550.3868  | 579.7887  |
| H                                                | 3.09013           | -1.51217                  | 0.42525                                       | 592.5484  | 678.5435  | 761.3410  |
| H                                                | 3.47932           | 0.30393                   | 0.38759                                       | 816.4302  | 838.2530  | 845.4328  |
| C                                                | -2.12240          | 0.34014                   | -0.94328                                      | 871.8516  | 927.5047  | 968.0200  |
| O                                                | -1.52818          | 2.08521                   | 0.70417                                       | 988.2373  | 1015.9249 | 1021.2740 |
| C                                                | -2.19832          | 1.08608                   | 0.35314                                       | 1027.6464 | 1066.7993 | 1069.7843 |
| C                                                | -0.71440          | 0.18469                   | -1.55450                                      | 1087.1663 | 1109.1879 | 1179.5362 |
| H                                                | -0.75092          | -0.66838                  | -2.23609                                      | 1187.1133 | 1214.9764 | 1222.9578 |
| H                                                | -0.45935          | 1.07727                   | -2.13212                                      | 1239.3939 | 1275.0096 | 1282.2413 |
| C                                                | -3.18839          | 0.47285                   | 1.28151                                       | 1292.3643 | 1317.5734 | 1336.9627 |
| H                                                | -2.98712          | 0.73716                   | 2.32014                                       | 1356.7830 | 1358.0563 | 1415.2693 |
| C                                                | -3.06472          | -1.01163                  | 0.89351                                       | 1456.2694 | 1471.1756 | 1483.4089 |
| H                                                | -2.16330          | -1.44013                  | 1.34366                                       | 1498.3132 | 1516.9489 | 1649.3235 |
| H                                                | -3.92692          | -1.59602                  | 1.21706                                       | 1723.9903 | 2273.4687 | 2997.2006 |
| C                                                | -2.89048          | -0.97268                  | -0.63559                                      | 3058.9830 | 3092.7784 | 3101.0606 |
| H                                                | -2.32483          | -1.83564                  | -0.98812                                      | 3104.1853 | 3162.4751 | 3173.4692 |
| H                                                | -3.86477          | -0.96223                  | -1.13307                                      | 3173.6832 | 3180.2360 | 3181.6322 |
| H                                                | -4.18135          | 0.85549                   | 1.00427                                       | 3195.0752 | 3268.4365 | 3295.3175 |
| H                                                | -2.72180          | 0.97146                   | -1.62425                                      |           |           |           |
| H                                                | -0.63836          | 2.28523                   | 0.16712                                       |           |           |           |
| <b><u>Statistical Thermodynamic Analysis</u></b> |                   |                           |                                               |           |           |           |
| Temperature=298.15 K                             |                   |                           | Pressure=1 atm                                |           |           |           |
| Zero-point correction= 0.209146                  |                   |                           | Electronic Energy = -1427.70406074            |           |           |           |
| Internal Energy (E)= -1427.48003274              |                   |                           | Enthalpy (H)= -1427.47908874                  |           |           |           |
| Gibbs Free Energy (G)=-1427.53848074             |                   |                           | Gibbs Free Energy of Solvation=-1427.56675139 |           |           |           |

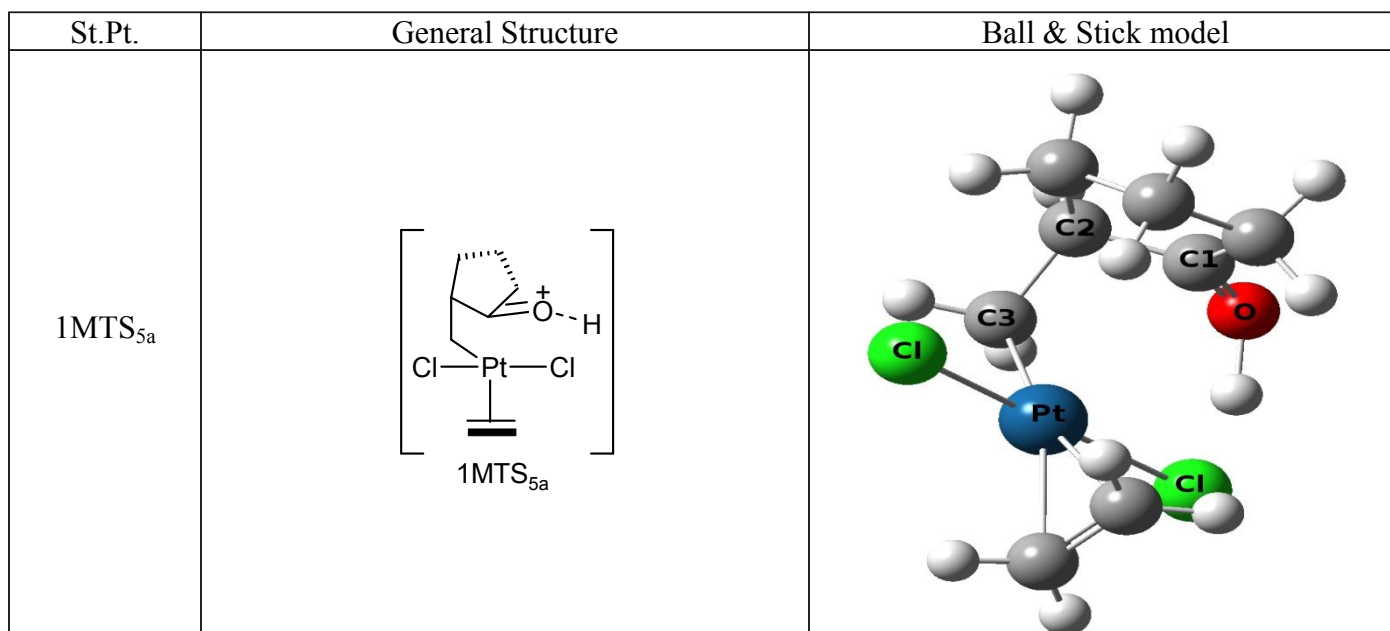

| <u>Cartesian co-ordinate</u> |          |          |          | <u>Frequencies</u> |           |           |
|------------------------------|----------|----------|----------|--------------------|-----------|-----------|
| Atoms                        | X        | Y        | Z        |                    |           |           |
| C                            | 2.88560  | 0.19404  | 0.66937  | -228.3143          | 56.8211   | 63.4434   |
| C                            | 2.06046  | 0.06048  | 1.73886  | 107.3943           | 115.3834  | 125.0329  |
| Pt                           | 0.67017  | -0.01280 | -0.21492 | 136.4426           | 150.7856  | 154.3228  |
| Cl                           | 0.88123  | -2.33316 | -0.25922 | 171.9573           | 184.4205  | 206.3989  |
| Cl                           | 0.44055  | 2.47088  | -0.10831 | 278.9067           | 303.6023  | 343.0649  |
| H                            | 1.69350  | 0.93111  | 2.27444  | 355.6540           | 382.6201  | 468.7482  |
| H                            | 1.85440  | -0.91746 | 2.16226  | 476.4130           | 531.8867  | 552.5539  |
| H                            | 3.35228  | -0.67358 | 0.21407  | 573.0397           | 595.4944  | 642.8830  |
| H                            | 3.20061  | 1.17298  | 0.32078  | 690.6896           | 797.0889  | 828.8714  |
| C                            | -2.30084 | -0.32590 | -0.87501 | 830.2099           | 836.3599  | 867.2701  |
| O                            | -2.22419 | 1.97369  | -0.14374 | 912.7198           | 950.7331  | 1012.1998 |
| C                            | -2.33805 | 0.76339  | 0.14533  | 1015.9904          | 1027.5101 | 1028.5393 |
| C                            | -0.88740 | -0.18649 | -1.51683 | 1068.8925          | 1070.4361 | 1099.5694 |
| H                            | -0.71368 | -1.06757 | -2.13853 | 1156.5226          | 1172.0638 | 1196.7676 |
| H                            | -0.88970 | 0.71067  | -2.14423 | 1213.7860          | 1236.4921 | 1238.8063 |
| C                            | -2.43909 | 0.22006  | 1.53558  | 1259.1554          | 1289.4637 | 1314.2806 |
| H                            | -1.79127 | 0.76763  | 2.22612  | 1299.1554          | 1357.8865 | 1358.5091 |
| C                            | -2.17777 | -1.28570 | 1.38778  | 1330.5144          | 1375.8865 | 1461.6931 |
| H                            | -1.11810 | -1.49922 | 1.54514  | 1363.4319          | 1428.9971 | 1518.3858 |
| H                            | -2.75146 | -1.87497 | 2.10514  | 1469.8590          | 1497.8307 | 1518.3858 |
| C                            | -2.56397 | -1.61046 | -0.07348 | 1649.7822          | 1763.8548 | 3045.4477 |
| H                            | -1.98771 | -2.45403 | -0.45850 | 3082.2102          | 3090.2985 | 3097.1854 |
| H                            | -3.62776 | -1.86324 | -0.13286 | 3111.2248          | 3133.1662 | 3159.1886 |
| H                            | -3.47798 | 0.42176  | 1.84110  | 3165.8163          | 3166.7402 | 3172.3813 |
| H                            | -3.04444 | -0.14305 | -1.65975 | 3182.1300          | 3265.8392 | 3284.2039 |
| H                            | -1.08259 | 2.37993  | -0.06316 |                    |           |           |

**Statistical Thermodynamic Analysis**

|                                      |                                              |
|--------------------------------------|----------------------------------------------|
| Temperature=298.15 K                 | Pressure=1 atm                               |
| Zero-point correction= 0.203323      | Electronic Energy = -1427.69076721           |
| Internal Energy (E)= -1427.47293121  | Enthalpy (H)= -1427.47198721                 |
| Gibbs Free Energy (G)=-1427.52994421 | Gibbs Free Energy of Solvation=-1427.5539267 |



| St.Pt.                                           | General Structure | Ball & Stick model        |                                               |           |           |           |
|--------------------------------------------------|-------------------|---------------------------|-----------------------------------------------|-----------|-----------|-----------|
| 1MI <sub>6a</sub>                                |                   |                           |                                               |           |           |           |
| <b><u>Cartesian co-ordinate</u></b>              |                   | <b><u>Frequencies</u></b> |                                               |           |           |           |
| -----<br>Atoms                                   | X                 | Y                         | Z                                             |           |           |           |
| -----                                            |                   |                           |                                               |           |           |           |
| C                                                | 2.83406           | 0.55566                   | 0.44288                                       | 62.2638   | 68.0955   | 98.3742   |
| C                                                | 2.12263           | 0.33583                   | 1.58418                                       | 108.5722  | 128.7002  | 133.2442  |
| Pt                                               | 0.65390           | 0.04208                   | -0.21860                                      | 155.2726  | 157.4305  | 168.0044  |
| Cl                                               | 1.18387           | -2.25400                  | -0.23577                                      | 202.5734  | 220.1382  | 223.2459  |
| Cl                                               | 0.13457           | 2.42398                   | -0.02936                                      | 258.9219  | 291.4215  | 312.8209  |
| H                                                | 1.68232           | 1.16526                   | 2.12896                                       | 361.1278  | 397.8299  | 438.3275  |
| H                                                | 2.11246           | -0.64474                  | 2.04962                                       | 496.2105  | 531.1245  | 577.4102  |
| H                                                | 3.39781           | -0.24677                  | -0.02202                                      | 591.1497  | 631.6473  | 664.1714  |
| H                                                | 2.96741           | 1.56051                   | 0.05501                                       | 770.5561  | 800.4364  | 831.3921  |
| C                                                | -2.35401          | -0.69630                  | -0.77736                                      | 837.3267  | 872.7351  | 901.5774  |
| O                                                | -2.60186          | 1.65467                   | -0.49532                                      | 924.3879  | 986.8199  | 1016.7075 |
| C                                                | -2.40521          | 0.51248                   | 0.03678                                       | 1028.2465 | 1039.7394 | 1047.6299 |
| C                                                | -0.93824          | -0.41766                  | -1.43438                                      | 1059.6746 | 1078.0374 | 1135.7966 |
| H                                                | -0.67798          | -1.34892                  | -1.94365                                      | 1171.6777 | 1183.5215 | 1218.9488 |
| H                                                | -1.07588          | 0.39350                   | -2.15409                                      | 1237.8552 | 1248.6627 | 1267.9483 |
| C                                                | -2.18592          | 0.25374                   | 1.48494                                       | 1309.2205 | 1324.3897 | 1342.3603 |
| H                                                | -1.45773          | 0.94089                   | 1.92517                                       | 1348.8456 | 1358.2248 | 1430.7820 |
| C                                                | -1.85752          | -1.24805                  | 1.56440                                       | 1438.6244 | 1464.8126 | 1466.1382 |
| H                                                | -0.77865          | -1.39208                  | 1.64344                                       | 1497.3253 | 1515.6595 | 1636.6877 |
| H                                                | -2.32813          | -1.71301                  | 2.43203                                       | 1660.4969 | 3036.8373 | 3085.1715 |
| C                                                | -2.37383          | -1.84921                  | 0.23412                                       | 3089.1941 | 3121.1423 | 3130.6975 |
| H                                                | -1.74283          | -2.67677                  | -0.09608                                      | 3147.6487 | 3162.0745 | 3165.1851 |
| H                                                | -3.39897          | -2.21532                  | 0.34862                                       | 3171.1606 | 3177.7891 | 3189.0678 |
| H                                                | -3.16829          | 0.47344                   | 1.93511                                       | 3267.3719 | 3291.1846 | 3424.5736 |
| H                                                | -3.10735          | -0.73947                  | -1.56770                                      |           |           |           |
| H                                                | -2.07869          | 2.35569                   | -0.02758                                      |           |           |           |
| <b><u>Statistical Thermodynamic Analysis</u></b> |                   |                           |                                               |           |           |           |
| Temperature=298.15 K                             |                   |                           | Pressure=1 atm                                |           |           |           |
| Zero-point correction= 0.210025                  |                   |                           | Electronic Energy = -1427.69556099            |           |           |           |
| Internal Energy (E)= -1427.47062099              |                   |                           | Enthalpy (H)= -1427.46967699                  |           |           |           |
| Gibbs Free Energy (G)=-1427.52829399             |                   |                           | Gibbs Free Energy of Solvation=-1427.55781609 |           |           |           |



| St.Pt.                                           | General Structure | Ball & Stick model        |                                               |           |           |           |
|--------------------------------------------------|-------------------|---------------------------|-----------------------------------------------|-----------|-----------|-----------|
| 1MI <sub>7a</sub>                                |                   |                           |                                               |           |           |           |
| <b><u>Cartesian co-ordinate</u></b>              |                   | <b><u>Frequencies</u></b> |                                               |           |           |           |
| -----<br>Atoms                                   | X                 | Y                         | Z                                             |           |           |           |
| -----                                            |                   |                           |                                               |           |           |           |
| C                                                | 2.69999           | 0.86154                   | 1.11428                                       | 18.7146   | 47.6735   | 66.4184   |
| C                                                | 3.13553           | 0.72555                   | -0.17471                                      | 97.2149   | 111.1922  | 130.5137  |
| Pt                                               | 0.96836           | -0.02202                  | -0.10698                                      | 136.1153  | 151.1706  | 154.1974  |
| Cl                                               | 0.15292           | 2.18755                   | -0.62886                                      | 189.1507  | 198.3445  | 221.1984  |
| Cl                                               | 1.68843           | -2.20551                  | 0.43054                                       | 238.5499  | 276.6774  | 309.4807  |
| H                                                | 3.68321           | -0.15919                  | -0.48274                                      | 326.4782  | 417.3772  | 459.8293  |
| H                                                | 3.08853           | 1.56042                   | -0.86659                                      | 503.2757  | 549.4735  | 606.2106  |
| H                                                | 2.30194           | 1.80795                   | 1.46621                                       | 620.3829  | 671.1632  | 730.0856  |
| H                                                | 2.89465           | 0.08788                   | 1.84954                                       | 769.4102  | 817.2391  | 842.5807  |
| C                                                | -1.99613          | 0.02529                   | -0.11505                                      | 871.0286  | 895.6651  | 938.8001  |
| O                                                | -3.59986          | -1.00710                  | -1.59607                                      | 960.3170  | 1001.2755 | 1022.4664 |
| C                                                | -3.32857          | -0.39933                  | -0.50403                                      | 1025.2304 | 1031.7413 | 1061.5110 |
| C                                                | -0.83932          | -0.79931                  | -0.66707                                      | 1066.1000 | 1129.0313 | 1146.7643 |
| H                                                | -1.90696          | 1.04964                   | -0.56312                                      | 1181.5142 | 1193.1579 | 1204.7461 |
| H                                                | -0.91529          | -1.84199                  | -0.34189                                      | 1240.3737 | 1244.5072 | 1251.5368 |
| H                                                | -0.82450          | -0.75879                  | -1.76985                                      | 1276.3138 | 1311.6448 | 1330.3329 |
| C                                                | -2.14230          | 0.25422                   | 1.40126                                       | 1344.7159 | 1347.3842 | 1428.0034 |
| C                                                | -3.60034          | 0.72451                   | 1.55232                                       | 1463.8977 | 1470.6905 | 1488.8231 |
| C                                                | -4.36770          | -0.12038                  | 0.51553                                       | 1504.8861 | 1516.4839 | 1630.6234 |
| H                                                | -2.76283          | -1.17744                  | -2.08153                                      | 1633.9444 | 2820.8571 | 3001.1174 |
| H                                                | -1.40918          | 0.98563                   | 1.74341                                       | 3052.3745 | 3090.2160 | 3107.3604 |
| H                                                | -4.63664          | -1.10424                  | 0.93068                                       | 3122.8504 | 3145.0563 | 3176.1745 |
| H                                                | -5.27846          | 0.30598                   | 0.08708                                       | 3180.1348 | 3180.9332 | 3193.3860 |
| H                                                | -3.99842          | 0.59635                   | 2.55895                                       | 3276.2213 | 3296.1331 | 3601.6623 |
| H                                                | -3.67635          | 1.78378                   | 1.28932                                       |           |           |           |
| H                                                | -1.96297          | -0.68886                  | 1.93011                                       |           |           |           |
| <b><u>Statistical Thermodynamic Analysis</u></b> |                   |                           |                                               |           |           |           |
| Temperature=298.15 K                             |                   |                           | Pressure=1 atm                                |           |           |           |
| Zero-point correction= 0.209860                  |                   |                           | Electronic Energy = -1427.68249314            |           |           |           |
| Internal Energy (E)= -1427.45741714              |                   |                           | Enthalpy (H)= -1427.45647314                  |           |           |           |
| Gibbs Free Energy (G)=-1427.51783114             |                   |                           | Gibbs Free Energy of Solvation=-1427.55972315 |           |           |           |



| St.Pt.                                           | General Structure                                                                 | Ball & Stick model                                                                 |                                               |            |           |           |
|--------------------------------------------------|-----------------------------------------------------------------------------------|------------------------------------------------------------------------------------|-----------------------------------------------|------------|-----------|-----------|
| 1MTS <sub>7a</sub>                               | 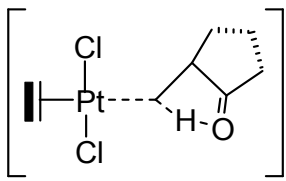 |  |                                               |            |           |           |
| <b><u>Cartesian co-ordinate</u></b>              |                                                                                   | <b><u>Frequencies</u></b>                                                          |                                               |            |           |           |
| -----<br>Atoms                                   | X                                                                                 | Y                                                                                  | Z                                             | -----      | -----     | -----     |
| -----                                            | -----                                                                             | -----                                                                              | -----                                         | -----      | -----     | -----     |
| C                                                | 2.46357                                                                           | 0.04768                                                                            | -1.43508                                      | -1405.8522 | 21.8381   | 45.7827   |
| C                                                | 3.10390                                                                           | -0.08193                                                                           | -0.21016                                      | 62.5720    | 99.2291   | 111.2835  |
| Pt                                               | 0.95800                                                                           | -0.01744                                                                           | 0.13075                                       | 130.4345   | 143.9811  | 150.1312  |
| Cl                                               | 0.79632                                                                           | -2.37745                                                                           | -0.08806                                      | 159.6972   | 179.4596  | 207.5513  |
| Cl                                               | 1.01460                                                                           | 2.34255                                                                            | 0.29783                                       | 247.5685   | 307.4176  | 314.1918  |
| H                                                | 3.50567                                                                           | 0.79244                                                                            | 0.29150                                       | 317.1965   | 354.6911  | 450.4855  |
| H                                                | 3.42605                                                                           | -1.05737                                                                           | 0.13989                                       | 486.3209   | 571.4795  | 600.2062  |
| H                                                | 2.28362                                                                           | -0.82745                                                                           | -2.05125                                      | 645.2274   | 707.5958  | 727.3212  |
| H                                                | 2.36750                                                                           | 1.02361                                                                            | -1.89956                                      | 762.8792   | 825.3333  | 834.9348  |
| C                                                | -1.93138                                                                          | -0.30404                                                                           | -0.01665                                      | 842.9906   | 846.3035  | 916.0816  |
| O                                                | -3.42321                                                                          | -0.19552                                                                           | 1.77178                                       | 930.4353   | 958.0936  | 967.0625  |
| C                                                | -3.32376                                                                          | -0.22542                                                                           | 0.54131                                       | 1018.5901  | 1033.1942 | 1052.0976 |
| C                                                | -0.99120                                                                          | -0.03379                                                                           | 1.14180                                       | 1057.4621  | 1057.9591 | 1148.0478 |
| H                                                | -1.77362                                                                          | -1.33183                                                                           | -0.38337                                      | 1184.2377  | 1188.1242 | 1215.9248 |
| H                                                | -0.91925                                                                          | 0.98286                                                                            | 1.53052                                       | 1229.1901  | 1235.0594 | 1262.5486 |
| H                                                | -0.64819                                                                          | -0.87396                                                                           | 1.75251                                       | 1286.8459  | 1305.0273 | 1309.0237 |
| C                                                | -2.07289                                                                          | 0.63207                                                                            | -1.23137                                      | 1312.2033  | 1345.9428 | 1363.5857 |
| C                                                | -3.48760                                                                          | 0.29728                                                                            | -1.76276                                      | 1437.0698  | 1446.6106 | 1464.8720 |
| C                                                | -4.35479                                                                          | 0.04011                                                                            | -0.50395                                      | 1502.5318  | 1515.5132 | 1590.2663 |
| H                                                | -2.17699                                                                          | -0.16712                                                                           | 1.95748                                       | 1684.3176  | 1841.1316 | 3042.3160 |
| H                                                | -1.28949                                                                          | 0.46400                                                                            | -1.97226                                      | 3091.8728  | 3095.4282 | 3100.2648 |
| H                                                | -4.92960                                                                          | 0.91798                                                                            | -0.19059                                      | 3106.5648  | 3146.1155 | 3164.1126 |
| H                                                | -5.06008                                                                          | -0.79094                                                                           | -0.59380                                      | 3171.0354  | 3177.6638 | 3185.3572 |
| H                                                | -3.90158                                                                          | 1.09030                                                                            | -2.38632                                      | 3213.5744  | 3274.4523 | 3292.1492 |
| H                                                | -3.44312                                                                          | -0.61203                                                                           | -2.36872                                      |            |           |           |
| H                                                | -1.99970                                                                          | 1.67537                                                                            | -0.90384                                      |            |           |           |
| <b><u>Statistical Thermodynamic Analysis</u></b> |                                                                                   |                                                                                    |                                               |            |           |           |
| Temperature=298.15 K                             |                                                                                   |                                                                                    | Pressure=1 atm                                |            |           |           |
| Zero-point correction= 0.205204                  |                                                                                   |                                                                                    | Electronic Energy = -1427.65881601            |            |           |           |
| Internal Energy (E)= -1427.43888301              |                                                                                   |                                                                                    | Enthalpy (H)= -1427.43793901                  |            |           |           |
| Gibbs Free Energy (G)=-1427.49826901             |                                                                                   |                                                                                    | Gibbs Free Energy of Solvation=-1427.53233945 |            |           |           |

| St.Pt.                                           | General Structure                                                                 | Ball & Stick model                                                                 |                                               |           |           |           |
|--------------------------------------------------|-----------------------------------------------------------------------------------|------------------------------------------------------------------------------------|-----------------------------------------------|-----------|-----------|-----------|
| 1MI <sub>8a</sub>                                | 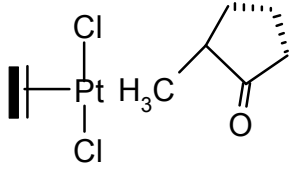 |  |                                               |           |           |           |
| <b><u>Cartesian co-ordinate</u></b>              |                                                                                   | <b><u>Frequencies</u></b>                                                          |                                               |           |           |           |
| -----<br>Atoms                                   | X                                                                                 | Y                                                                                  | Z                                             |           |           |           |
| -----                                            |                                                                                   |                                                                                    |                                               |           |           |           |
| C                                                | 2.78133                                                                           | 0.11595                                                                            | 1.02153                                       | 17.8160   | 45.9072   | 49.5990   |
| C                                                | 3.05539                                                                           | 0.10198                                                                            | -0.37333                                      | 75.7747   | 85.6544   | 93.4035   |
| Pt                                               | 1.00384                                                                           | 0.00523                                                                            | -0.04662                                      | 108.2373  | 120.8175  | 141.8218  |
| Cl                                               | 0.81629                                                                           | 2.33957                                                                            | -0.09176                                      | 165.0550  | 181.7967  | 214.5073  |
| Cl                                               | 1.06116                                                                           | -2.33146                                                                           | -0.00053                                      | 237.9538  | 322.4030  | 336.0688  |
| H                                                | 3.37027                                                                           | -0.82115                                                                           | -0.85042                                      | 344.2245  | 354.4602  | 451.7713  |
| H                                                | 3.27332                                                                           | 1.03275                                                                            | -0.88813                                      | 466.7801  | 534.5200  | 546.3191  |
| H                                                | 2.79782                                                                           | 1.05731                                                                            | 1.56232                                       | 560.9740  | 616.2962  | 715.8883  |
| H                                                | 2.89250                                                                           | -0.79711                                                                           | 1.59851                                       | 809.8983  | 828.4086  | 831.5237  |
| C                                                | -2.18881                                                                          | 0.29166                                                                            | -0.39273                                      | 874.0652  | 909.4465  | 953.6124  |
| O                                                | -4.34328                                                                          | -0.01964                                                                           | -1.47268                                      | 969.4688  | 993.2582  | 998.3660  |
| C                                                | -3.69903                                                                          | 0.03992                                                                            | -0.45643                                      | 1040.9270 | 1064.6883 | 1084.0273 |
| C                                                | -1.46745                                                                          | -0.30531                                                                           | -1.59285                                      | 1094.4830 | 1155.4581 | 1187.0539 |
| H                                                | -2.06803                                                                          | 1.38625                                                                            | -0.40161                                      | 1191.3923 | 1213.4853 | 1222.6474 |
| H                                                | -1.36361                                                                          | -1.39009                                                                           | -1.50777                                      | 1242.8367 | 1247.3811 | 1306.6570 |
| H                                                | -0.46536                                                                          | 0.13472                                                                            | -1.76678                                      | 1315.2663 | 1323.4200 | 1357.6175 |
| C                                                | -1.81413                                                                          | -0.22124                                                                           | 1.00402                                       | 1383.0081 | 1419.5690 | 1458.0905 |
| C                                                | -3.03537                                                                          | 0.14770                                                                            | 1.87056                                       | 1463.2724 | 1466.4210 | 1487.0233 |
| C                                                | -4.23061                                                                          | -0.15547                                                                           | 0.96035                                       | 1513.9944 | 1522.2234 | 1547.3878 |
| H                                                | -2.02756                                                                          | -0.07440                                                                           | -2.50381                                      | 1910.4292 | 2959.2955 | 3002.1204 |
| H                                                | -0.89896                                                                          | 0.23349                                                                            | 1.41900                                       | 3046.1687 | 3081.1735 | 3091.7923 |
| H                                                | -4.53948                                                                          | -1.20432                                                                           | 1.04408                                       | 3103.2406 | 3111.8853 | 3149.8059 |
| H                                                | -5.11598                                                                          | 0.45963                                                                            | 1.13348                                       | 3158.7814 | 3170.8055 | 3173.9739 |
| H                                                | -3.05959                                                                          | -0.40378                                                                           | 2.81163                                       | 3176.7991 | 3272.4381 | 3286.5882 |
| H                                                | -3.00221                                                                          | 1.21580                                                                            | 2.10804                                       |           |           |           |
| H                                                | -1.67119                                                                          | -1.30862                                                                           | 0.98198                                       |           |           |           |
| <b><u>Statistical Thermodynamic Analysis</u></b> |                                                                                   |                                                                                    |                                               |           |           |           |
| Temperature=298.15 K                             |                                                                                   |                                                                                    | Pressure=1 atm                                |           |           |           |
| Zero-point correction= 0.209500                  |                                                                                   |                                                                                    | Electronic Energy = -1427.71207201            |           |           |           |
| Internal Energy (E)= -1427.48689901              |                                                                                   |                                                                                    | Enthalpy (H)= -1427.48595501                  |           |           |           |
| Gibbs Free Energy (G)=-1427.54924701             |                                                                                   |                                                                                    | Gibbs Free Energy of Solvation=-1427.58081817 |           |           |           |

| St.Pt.                              | General Structure                                                                                                                    | Ball & Stick model                                                                  |          |           |           |           |
|-------------------------------------|--------------------------------------------------------------------------------------------------------------------------------------|-------------------------------------------------------------------------------------|----------|-----------|-----------|-----------|
| 1DI <sub>1</sub>                    | 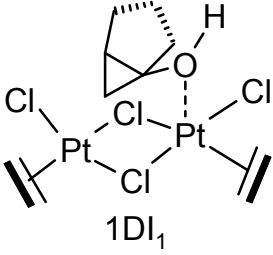 <p style="text-align: center;">1DI<sub>1</sub></p> |  |          |           |           |           |
| <b><u>Cartesian co-ordinate</u></b> |                                                                                                                                      | <b><u>Frequencies</u></b>                                                           |          |           |           |           |
| -----<br>Atoms                      | X                                                                                                                                    | Y                                                                                   | Z        |           |           |           |
| -----                               |                                                                                                                                      |                                                                                     |          |           |           |           |
| C                                   | -1.22019                                                                                                                             | -3.02450                                                                            | -0.16943 | 14.1999   | 37.8597   | 49.8787   |
| C                                   | -0.65249                                                                                                                             | -2.45932                                                                            | 0.98089  | 63.7793   | 75.8017   | 91.7218   |
| Pt                                  | -1.52464                                                                                                                             | -0.91854                                                                            | -0.21186 | 93.0926   | 103.2254  | 104.1376  |
| Cl                                  | -3.55260                                                                                                                             | -1.26527                                                                            | 0.88435  | 112.3150  | 121.9928  | 147.8602  |
| Cl                                  | 0.55176                                                                                                                              | -0.67028                                                                            | -1.40945 | 157.7615  | 169.7678  | 173.1685  |
| H                                   | 0.41340                                                                                                                              | -2.26324                                                                            | 1.03242  | 179.9131  | 184.2203  | 202.1569  |
| H                                   | -1.19509                                                                                                                             | -2.46404                                                                            | 1.92090  | 213.6465  | 238.9002  | 268.7777  |
| H                                   | -2.20525                                                                                                                             | -3.47755                                                                            | -0.12441 | 276.4455  | 287.5229  | 300.5991  |
| H                                   | -0.59332                                                                                                                             | -3.27565                                                                            | -1.01957 | 338.2751  | 343.9166  | 355.6391  |
| Pt                                  | 2.34374                                                                                                                              | 0.17397                                                                             | 0.09852  | 388.1225  | 392.9039  | 409.1460  |
| Cl                                  | 3.82610                                                                                                                              | -0.00797                                                                            | -1.68928 | 443.1523  | 500.7035  | 512.8275  |
| Cl                                  | 0.84942                                                                                                                              | 0.36737                                                                             | 1.96789  | 553.5350  | 588.1055  | 642.3610  |
| H                                   | 4.79860                                                                                                                              | -0.33694                                                                            | 0.95022  | 652.0215  | 733.8710  | 774.6988  |
| C                                   | 3.98769                                                                                                                              | 0.19427                                                                             | 1.43791  | 791.2711  | 830.9361  | 833.8208  |
| C                                   | 3.68261                                                                                                                              | 1.50898                                                                             | 1.05630  | 844.7469  | 879.9197  | 894.9935  |
| H                                   | 3.63292                                                                                                                              | -0.19170                                                                            | 2.38822  | 918.2523  | 948.0375  | 959.9919  |
| H                                   | 3.09010                                                                                                                              | 2.14106                                                                             | 1.70998  | 1021.9869 | 1028.0299 | 1029.8397 |
| H                                   | 4.25540                                                                                                                              | 1.99409                                                                             | 0.27260  | 1038.7053 | 1082.9692 | 1084.4174 |
| C                                   | -2.63883                                                                                                                             | 2.53266                                                                             | -1.27034 | 1086.4897 | 1087.0776 | 1089.6363 |
| O                                   | -0.48831                                                                                                                             | 2.21761                                                                             | -0.19831 | 1110.1251 | 1140.9360 | 1183.0774 |
| C                                   | -1.82980                                                                                                                             | 1.97746                                                                             | -0.19334 | 1218.1706 | 1223.9829 | 1229.2213 |
| C                                   | -2.42138                                                                                                                             | 1.00137                                                                             | -1.36061 | 1235.0570 | 1260.1824 | 1284.5002 |
| H                                   | -3.35663                                                                                                                             | 0.44897                                                                             | -1.29658 | 1285.5452 | 1292.1088 | 1331.6291 |
| H                                   | -1.76325                                                                                                                             | 0.77317                                                                             | -2.19332 | 1340.7039 | 1360.0012 | 1403.8625 |
| H                                   | -0.07798                                                                                                                             | 1.73758                                                                             | 0.54240  | 1429.6433 | 1467.6612 | 1471.7756 |
| C                                   | -2.62232                                                                                                                             | 2.05190                                                                             | 1.10332  | 1490.8179 | 1503.5628 | 1526.9123 |
| H                                   | -2.47904                                                                                                                             | 1.19857                                                                             | 1.77029  | 1537.5034 | 1570.9875 | 1573.9237 |
| C                                   | -4.07777                                                                                                                             | 2.23173                                                                             | 0.64305  | 3077.0122 | 3080.3249 | 3116.4683 |
| H                                   | -4.54060                                                                                                                             | 1.25119                                                                             | 0.50684  | 3133.3901 | 3135.9033 | 3144.5370 |
| H                                   | -4.67771                                                                                                                             | 2.77604                                                                             | 1.37460  | 3168.5774 | 3183.4763 | 3185.8364 |
| C                                   | -3.97446                                                                                                                             | 2.97623                                                                             | -0.70381 | 3192.5117 | 3198.3523 | 3227.3755 |
| H                                   | -4.81506                                                                                                                             | 2.76530                                                                             | -1.37045 | 3250.0821 | 3278.8890 | 3290.1377 |
| H                                   | -3.93476                                                                                                                             | 4.05947                                                                             | -0.54561 | 3293.4532 | 3306.2720 | 3699.5711 |
| H                                   | -2.25546                                                                                                                             | 2.95285                                                                             | 1.61011  |           |           |           |
| H                                   | -2.14697                                                                                                                             | 3.09698                                                                             | -2.05489 |           |           |           |

**Statistical Thermodynamic Analysis**

Temperature=298.15 K

Pressure=1 atm

Zero-point correction= 0.271519

Electronic Energy = -2545.69413625

Internal Energy (E)= -2545.39958725

Enthalpy (H)= -2545.39864325

Gibbs Free Energy (G)=-2545.47816425

Gibbs Free Energy of Solvation=-2545.53345763

| St.Pt.                                           | General Structure                                                                 | Ball & Stick model                                                                  |                |           |           |           |
|--------------------------------------------------|-----------------------------------------------------------------------------------|-------------------------------------------------------------------------------------|----------------|-----------|-----------|-----------|
| 1DTS <sub>1</sub>                                | 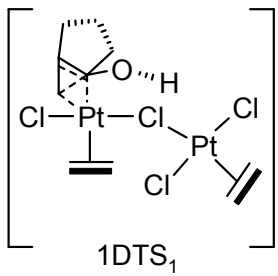 |  |                |           |           |           |
| <b><u>Cartesian co-ordinate</u></b>              |                                                                                   | <b><u>Frequencies</u></b>                                                           |                |           |           |           |
| -----<br>Atoms                                   | X                                                                                 | Y                                                                                   | Z              |           |           |           |
| -----                                            |                                                                                   |                                                                                     |                |           |           |           |
| C                                                | -0.95185                                                                          | -2.95982                                                                            | 0.14909        | -192.3843 | 22.3346   | 38.6039   |
| C                                                | -0.50600                                                                          | -2.21526                                                                            | 1.23188        | 52.9152   | 69.7467   | 77.5234   |
| Pt                                               | -1.53977                                                                          | -0.88682                                                                            | -0.17267       | 93.4949   | 102.6346  | 109.4501  |
| Cl                                               | -3.53363                                                                          | -1.36576                                                                            | 0.95057        | 120.0926  | 130.6907  | 144.1220  |
| Cl                                               | 0.52499                                                                           | -0.53849                                                                            | -1.38978       | 146.4252  | 162.4307  | 165.9614  |
| H                                                | 0.52163                                                                           | -1.87170                                                                            | 1.28323        | 178.4067  | 193.4434  | 201.8476  |
| H                                                | -1.08743                                                                          | -2.16627                                                                            | 2.14675        | 211.9803  | 240.7249  | 246.8615  |
| H                                                | -1.88582                                                                          | -3.50920                                                                            | 0.20669        | 267.0421  | 282.5430  | 295.2592  |
| H                                                | -0.27301                                                                          | -3.20803                                                                            | -0.66110       | 323.6542  | 332.6721  | 338.1070  |
| Pt                                               | 2.38560                                                                           | 0.21397                                                                             | 0.06868        | 344.2120  | 388.1438  | 407.4027  |
| Cl                                               | 3.84894                                                                           | -0.37904                                                                            | -1.64214       | 422.8987  | 453.3485  | 468.8454  |
| Cl                                               | 0.91704                                                                           | 0.84325                                                                             | 1.86699        | 513.7866  | 585.9258  | 653.7244  |
| H                                                | 4.73371                                                                           | -0.53164                                                                            | 1.04640        | 719.8592  | 728.0540  | 765.5684  |
| C                                                | 4.00282                                                                           | 0.16446                                                                             | 1.44483        | 781.6452  | 792.3507  | 826.8587  |
| C                                                | 3.89401                                                                           | 1.45299                                                                             | 0.90421        | 844.3864  | 845.2722  | 895.8410  |
| H                                                | 3.58470                                                                           | -0.05110                                                                            | 2.42312        | 907.9167  | 945.6876  | 960.2650  |
| H                                                | 3.39116                                                                           | 2.23680                                                                             | 1.46165        | 1025.0802 | 1040.3713 | 1042.8909 |
| H                                                | 4.53869                                                                           | 1.75337                                                                             | 0.08469        | 1045.8774 | 1063.3802 | 1073.0504 |
| C                                                | -2.84538                                                                          | 2.22230                                                                             | -1.36841       | 1079.3049 | 1083.6530 | 1095.3272 |
| O                                                | -0.66925                                                                          | 2.23171                                                                             | -0.37083       | 1127.0525 | 1149.1674 | 1190.4358 |
| C                                                | -1.95962                                                                          | 1.94836                                                                             | -0.26653       | 1222.7285 | 1224.1981 | 1233.0396 |
| C                                                | -2.58131                                                                          | 0.67721                                                                             | -1.42375       | 1234.3408 | 1262.4974 | 1286.5381 |
| H                                                | -3.53309                                                                          | 0.15102                                                                             | -1.37239       | 1310.6304 | 1312.9466 | 1335.7087 |
| H                                                | -1.97688                                                                          | 0.48557                                                                             | -2.30682       | 1343.2254 | 1361.5325 | 1410.6253 |
| H                                                | -0.17309                                                                          | 1.87049                                                                             | 0.39535        | 1442.2624 | 1465.5552 | 1471.3918 |
| C                                                | -2.71710                                                                          | 1.99688                                                                             | 1.04604        | 1483.3493 | 1501.6275 | 1528.9749 |
| H                                                | -2.46394                                                                          | 1.19858                                                                             | 1.74603        | 1575.0962 | 1577.9906 | 1588.9065 |
| C                                                | -4.19532                                                                          | 2.01291                                                                             | 0.62206        | 3071.2956 | 3085.9394 | 3121.1816 |
| H                                                | -4.57626                                                                          | 0.99063                                                                             | 0.60407        | 3123.1978 | 3140.4048 | 3157.1723 |
| H                                                | -4.81262                                                                          | 2.58559                                                                             | 1.31609        | 3175.8342 | 3178.3330 | 3187.5135 |
| C                                                | -4.19692                                                                          | 2.61617                                                                             | -0.79782       | 3190.1386 | 3192.0191 | 3197.6871 |
| H                                                | -5.03125                                                                          | 2.26075                                                                             | -1.40804       | 3237.7627 | 3274.6543 | 3284.3174 |
| H                                                | -4.24882                                                                          | 3.70955                                                                             | -0.75887       | 3295.4718 | 3299.2427 | 3509.8121 |
| H                                                | -2.41942                                                                          | 2.95502                                                                             | 1.49244        |           |           |           |
| H                                                | -2.44424                                                                          | 2.75319                                                                             | -2.22632       |           |           |           |
| <b><u>Statistical Thermodynamic Analysis</u></b> |                                                                                   |                                                                                     |                |           |           |           |
| Temperature=298.15 K                             |                                                                                   |                                                                                     | Pressure=1 atm |           |           |           |

Zero-point correction= 0.270445

Electronic Energy = -2545.69303228

Internal Energy (E)= -2545.40008728

Enthalpy (H)= -2545.39914228

Gibbs Free Energy (G)=-2545.47679528

Gibbs Free Energy of Solvation=-2545.53076601

| St.Pt.                       | General Structure                                                                                                                   | Ball & Stick model                                                                  |          |           |           |           |
|------------------------------|-------------------------------------------------------------------------------------------------------------------------------------|-------------------------------------------------------------------------------------|----------|-----------|-----------|-----------|
| 1D <sub>2</sub>              | 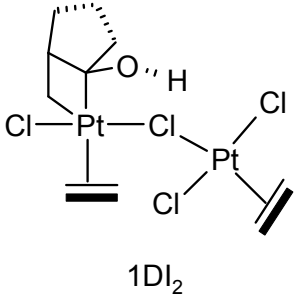 <p style="text-align: center;">1D<sub>2</sub></p> |  |          |           |           |           |
| <b>Cartesian co-ordinate</b> |                                                                                                                                     | <b>Frequencies</b>                                                                  |          |           |           |           |
| -----<br>Atoms               | X                                                                                                                                   | Y                                                                                   | Z        |           |           |           |
| -----                        |                                                                                                                                     |                                                                                     |          |           |           |           |
| C                            | -2.05531                                                                                                                            | -2.96767                                                                            | -0.18282 | 32.7419   | 37.2026   | 48.0353   |
| C                            | -1.62418                                                                                                                            | -2.54022                                                                            | 1.01970  | 62.1567   | 69.2983   | 85.3025   |
| Pt                           | -1.87122                                                                                                                            | -0.41971                                                                            | -0.46476 | 88.1205   | 102.3930  | 108.6207  |
| Cl                           | -4.13746                                                                                                                            | -0.30393                                                                            | 0.09970  | 123.9936  | 133.8866  | 141.9075  |
| Cl                           | 0.29256                                                                                                                             | -0.79747                                                                            | -1.45320 | 150.6144  | 159.3043  | 162.8473  |
| H                            | -0.56090                                                                                                                            | -2.51331                                                                            | 1.25117  | 178.1113  | 187.2464  | 198.8159  |
| H                            | -2.33543                                                                                                                            | -2.28727                                                                            | 1.80212  | 206.1177  | 229.5601  | 239.4274  |
| H                            | -3.11599                                                                                                                            | -3.06596                                                                            | -0.39712 | 264.5817  | 282.5712  | 295.6897  |
| H                            | -1.34776                                                                                                                            | -3.28661                                                                            | -0.94350 | 301.9252  | 302.4466  | 329.5451  |
| Pt                           | 2.30334                                                                                                                             | -0.03946                                                                            | -0.00777 | 332.8456  | 365.6470  | 429.6822  |
| Cl                           | 2.52302                                                                                                                             | 1.82902                                                                             | -1.40535 | 436.3821  | 449.6718  | 524.8973  |
| Cl                           | 1.99509                                                                                                                             | -1.83644                                                                            | 1.52967  | 538.6821  | 552.8057  | 584.0474  |
| H                            | 4.77296                                                                                                                             | 0.12654                                                                             | -0.92040 | 638.2010  | 658.4234  | 805.4758  |
| C                            | 4.37850                                                                                                                             | -0.28933                                                                            | 0.00133  | 809.4653  | 842.0289  | 847.7711  |
| C                            | 3.99594                                                                                                                             | 0.57027                                                                             | 1.05761  | 849.2446  | 858.9552  | 875.1430  |
| H                            | 4.58737                                                                                                                             | -1.33569                                                                            | 0.20235  | 922.9609  | 954.0366  | 1008.1626 |
| H                            | 3.92894                                                                                                                             | 0.18091                                                                             | 2.06851  | 1009.1768 | 1032.6420 | 1042.2860 |
| H                            | 4.10780                                                                                                                             | 1.64346                                                                             | 0.94150  | 1045.8363 | 1071.6648 | 1074.5991 |
| C                            | -1.09096                                                                                                                            | 2.15888                                                                             | -0.05272 | 1087.5855 | 1090.8468 | 1099.8684 |
| O                            | 0.12033                                                                                                                             | 0.59500                                                                             | 1.33875  | 1116.3306 | 1162.1575 | 1186.7475 |
| C                            | -1.09587                                                                                                                            | 1.02606                                                                             | 0.96327  | 1199.7996 | 1231.0309 | 1246.2646 |
| C                            | -1.86191                                                                                                                            | 1.47489                                                                             | -1.19363 | 1248.3375 | 1257.0268 | 1280.2391 |
| H                            | -2.89321                                                                                                                            | 1.81389                                                                             | -1.29910 | 1301.0242 | 1313.7180 | 1331.8596 |
| H                            | -1.32404                                                                                                                            | 1.46169                                                                             | -2.14125 | 1352.8404 | 1368.1799 | 1378.8927 |
| H                            | 0.11042                                                                                                                             | -0.15452                                                                            | 1.96125  | 1412.1874 | 1470.6840 | 1471.0922 |
| C                            | -2.11212                                                                                                                            | 1.33151                                                                             | 2.06161  | 1472.6631 | 1478.6987 | 1499.1482 |
| H                            | -2.74331                                                                                                                            | 0.48728                                                                             | 2.33987  | 1521.0693 | 1560.7209 | 1672.4835 |
| C                            | -2.88325                                                                                                                            | 2.54905                                                                             | 1.52905  | 3078.0012 | 3085.7822 | 3114.5784 |
| H                            | -3.73386                                                                                                                            | 2.21046                                                                             | 0.93295  | 3122.2040 | 3133.1719 | 3147.8507 |
| H                            | -3.26611                                                                                                                            | 3.17015                                                                             | 2.34119  | 3153.9866 | 3169.4905 | 3170.4496 |
| C                            | -1.85750                                                                                                                            | 3.28603                                                                             | 0.64968  | 3178.9864 | 3180.3268 | 3188.6415 |
| H                            | -2.32003                                                                                                                            | 3.97070                                                                             | -0.06560 | 3209.5912 | 3252.3059 | 3273.2305 |
| H                            | -1.16729                                                                                                                            | 3.86436                                                                             | 1.27341  | 3278.3353 | 3294.6916 | 3724.3033 |
| H                            | -1.50393                                                                                                                            | 1.61796                                                                             | 2.92958  |           |           |           |
| H                            | -0.06783                                                                                                                            | 2.40461                                                                             | -0.35221 |           |           |           |

**Statistical Thermodynamic Analysis**

Temperature=298.15 K

Pressure=1 atm

Zero-point correction= 0.270306

Electronic Energy = -2545.69496250

Internal Energy (E)= -2545.4012175

Enthalpy (H)= -2545.4002725

Gibbs Free Energy (G)=-2545.4799805

Gibbs Free Energy of Solvation=-2545.5345693



| St.Pt.                                           | General Structure                                                                                                                     | Ball & Stick model                                                                  |                                    |           |           |           |
|--------------------------------------------------|---------------------------------------------------------------------------------------------------------------------------------------|-------------------------------------------------------------------------------------|------------------------------------|-----------|-----------|-----------|
| 1DTS <sub>2</sub>                                | 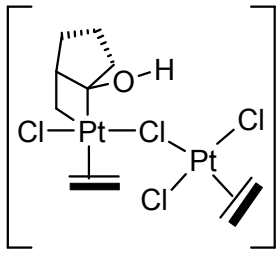 <p style="text-align: center;">1DTS<sub>2</sub></p> |  |                                    |           |           |           |
| <b><u>Cartesian co-ordinate</u></b>              |                                                                                                                                       | <b><u>Frequencies</u></b>                                                           |                                    |           |           |           |
| -----<br>Atoms                                   | X                                                                                                                                     | Y                                                                                   | Z                                  | -----     | -----     | -----     |
| -----                                            | -----                                                                                                                                 | -----                                                                               | -----                              | -----     | -----     | -----     |
| C                                                | -1.26360                                                                                                                              | -2.95380                                                                            | 0.24144                            | -358.7387 | 35.8009   | 48.9132   |
| C                                                | -1.22798                                                                                                                              | -2.28490                                                                            | 1.41054                            | 67.3340   | 69.0321   | 79.6023   |
| Pt                                               | -1.81701                                                                                                                              | -0.52526                                                                            | -0.42212                           | 83.2518   | 97.6036   | 115.2278  |
| Cl                                               | -4.02104                                                                                                                              | -0.73929                                                                            | 0.32359                            | 120.6326  | 134.8289  | 145.6047  |
| Cl                                               | 0.26550                                                                                                                               | -0.48630                                                                            | -1.61673                           | 148.7588  | 161.4644  | 169.0473  |
| H                                                | -0.28511                                                                                                                              | -1.90475                                                                            | 1.79429                            | 183.8466  | 189.9204  | 192.1121  |
| H                                                | -2.12592                                                                                                                              | -2.16109                                                                            | 2.00986                            | 200.5220  | 212.4404  | 243.3884  |
| H                                                | -2.18770                                                                                                                              | -3.39906                                                                            | -0.12145                           | 252.5174  | 287.2336  | 296.3569  |
| H                                                | -0.34799                                                                                                                              | -3.12316                                                                            | -0.31932                           | 308.6857  | 317.7946  | 320.3881  |
| Pt                                               | 2.25837                                                                                                                               | 0.03506                                                                             | 0.00865                            | 322.8485  | 337.0599  | 375.4164  |
| Cl                                               | 2.29134                                                                                                                               | 2.31511                                                                             | -0.60728                           | 440.2786  | 441.1816  | 449.1314  |
| Cl                                               | 2.20770                                                                                                                               | -2.20722                                                                            | 0.73419                            | 547.4628  | 558.1195  | 579.3145  |
| H                                                | 4.64396                                                                                                                               | 0.65817                                                                             | -0.91140                           | 637.5640  | 660.1935  | 811.6389  |
| C                                                | 4.32852                                                                                                                               | -0.07661                                                                            | -0.17692                           | 812.5030  | 834.7584  | 842.2162  |
| C                                                | 3.98648                                                                                                                               | 0.34067                                                                             | 1.13440                            | 847.1177  | 856.0994  | 881.1574  |
| H                                                | 4.60041                                                                                                                               | -1.11112                                                                            | -0.36162                           | 924.4432  | 953.5784  | 1001.6233 |
| H                                                | 4.00828                                                                                                                               | -0.37972                                                                            | 1.94597                            | 1004.8996 | 1035.5529 | 1039.2736 |
| H                                                | 4.06060                                                                                                                               | 1.39166                                                                             | 1.39523                            | 1053.9742 | 1065.7764 | 1067.1403 |
| C                                                | -1.38679                                                                                                                              | 2.10837                                                                             | -0.34912                           | 1087.8502 | 1090.9592 | 1096.6964 |
| O                                                | 0.04034                                                                                                                               | 0.68417                                                                             | 1.20655                            | 1140.2663 | 1147.5820 | 1177.2783 |
| C                                                | -1.22123                                                                                                                              | 1.06853                                                                             | 0.77134                            | 1197.2058 | 1227.9593 | 1236.5550 |
| C                                                | -2.20444                                                                                                                              | 1.25178                                                                             | -1.32955                           | 1245.8264 | 1249.2821 | 1249.9413 |
| H                                                | -3.27898                                                                                                                              | 1.43281                                                                             | -1.30419                           | 1280.7832 | 1293.2715 | 1330.6462 |
| H                                                | -1.80761                                                                                                                              | 1.21293                                                                             | -2.34281                           | 1337.3780 | 1366.2242 | 1370.2114 |
| H                                                | 0.37705                                                                                                                               | 1.34740                                                                             | 1.82847                            | 1374.6231 | 1462.3549 | 1467.0857 |
| C                                                | -2.17803                                                                                                                              | 1.44212                                                                             | 1.90321                            | 1474.5588 | 1478.4078 | 1501.1219 |
| H                                                | -2.69529                                                                                                                              | 0.58887                                                                             | 2.34201                            | 1521.5714 | 1553.1226 | 1668.9401 |
| C                                                | -3.09271                                                                                                                              | 2.52012                                                                             | 1.31224                            | 3040.7640 | 3076.3379 | 3114.5382 |
| H                                                | -3.94412                                                                                                                              | 2.04826                                                                             | 0.81377                            | 3127.2861 | 3139.9303 | 3151.2732 |
| H                                                | -3.48592                                                                                                                              | 3.18926                                                                             | 2.08007                            | 3162.6024 | 3165.8032 | 3171.7388 |
| C                                                | -2.18983                                                                                                                              | 3.24184                                                                             | 0.29680                            | 3172.2119 | 3178.2303 | 3179.4694 |
| H                                                | -2.74904                                                                                                                              | 3.82050                                                                             | -0.44301                           | 3214.6518 | 3263.8666 | 3269.7229 |
| H                                                | -1.50866                                                                                                                              | 3.92754                                                                             | 0.81398                            | 3285.5785 | 3290.1856 | 3821.3738 |
| H                                                | -1.54614                                                                                                                              | 1.88558                                                                             | 2.68744                            |           |           |           |
| H                                                | -0.41858                                                                                                                              | 2.39046                                                                             | -0.76959                           |           |           |           |
| <b><u>Statistical Thermodynamic Analysis</u></b> |                                                                                                                                       |                                                                                     |                                    |           |           |           |
| Temperature=298.15 K                             |                                                                                                                                       |                                                                                     | Pressure=1 atm                     |           |           |           |
| Zero-point correction= 0.269543                  |                                                                                                                                       |                                                                                     | Electronic Energy = -2545.68239038 |           |           |           |

Internal Energy (E)= -2545.39010338

Enthalpy (H)= -2545.38915938

Gibbs Free Energy (G)=-2545.46650538

Gibbs Free Energy of Solvation=-2545.52561891

| St.Pt.                              | General Structure                                                                                                                    | Ball & Stick model                                                                 |          |           |           |           |
|-------------------------------------|--------------------------------------------------------------------------------------------------------------------------------------|------------------------------------------------------------------------------------|----------|-----------|-----------|-----------|
| 1DI <sub>3</sub>                    | 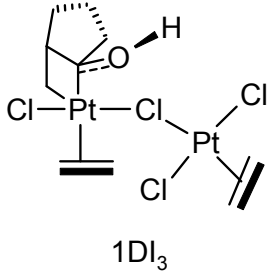 <p style="text-align: center;">1DI<sub>3</sub></p> |  |          |           |           |           |
| <b><u>Cartesian co-ordinate</u></b> |                                                                                                                                      | <b><u>Frequencies</u></b>                                                          |          |           |           |           |
| Atoms                               | X                                                                                                                                    | Y                                                                                  | Z        |           |           |           |
| C                                   | -0.71505                                                                                                                             | -2.80373                                                                           | 0.62254  | 27.2805   | 40.8075   | 46.5614   |
| C                                   | -0.56611                                                                                                                             | -1.88451                                                                           | 1.59942  | 58.6234   | 72.0327   | 72.5835   |
| Pt                                  | -1.68607                                                                                                                             | -0.68646                                                                           | -0.32310 | 95.2827   | 109.5124  | 115.5668  |
| Cl                                  | -3.77477                                                                                                                             | -1.38194                                                                           | 0.43860  | 132.0479  | 138.3835  | 145.1323  |
| Cl                                  | 0.40306                                                                                                                              | -0.25838                                                                           | -1.53444 | 154.1445  | 162.8365  | 168.3403  |
| H                                   | 0.37116                                                                                                                              | -1.34425                                                                           | 1.71104  | 169.0544  | 176.3071  | 182.0627  |
| H                                   | -1.33733                                                                                                                             | -1.72979                                                                           | 2.34873  | 196.7581  | 225.0324  | 227.6343  |
| H                                   | -1.61515                                                                                                                             | -3.40884                                                                           | 0.56022  | 271.7922  | 276.0456  | 289.1718  |
| H                                   | 0.10071                                                                                                                              | -3.00878                                                                           | -0.06605 | 294.3053  | 299.6424  | 335.5579  |
| Pt                                  | 2.37387                                                                                                                              | 0.13714                                                                            | -0.08953 | 336.7987  | 356.6818  | 401.7329  |
| Cl                                  | 1.96444                                                                                                                              | 2.47890                                                                            | -0.31794 | 451.9410  | 463.7767  | 506.9022  |
| Cl                                  | 2.76048                                                                                                                              | -2.15465                                                                           | 0.14853  | 511.6666  | 571.9206  | 622.9500  |
| H                                   | 4.65487                                                                                                                              | 1.48247                                                                            | 0.08513  | 665.4347  | 774.0454  | 777.6626  |
| C                                   | 4.37359                                                                                                                              | 0.52904                                                                            | 0.52151  | 805.3250  | 839.4318  | 840.2883  |
| C                                   | 3.54674                                                                                                                              | 0.48938                                                                            | 1.65070  | 841.2820  | 855.4730  | 875.0018  |
| H                                   | 4.96028                                                                                                                              | -0.34180                                                                           | 0.24734  | 916.8485  | 952.9365  | 1008.5420 |
| H                                   | 3.49492                                                                                                                              | -0.41213                                                                           | 2.25274  | 1021.2028 | 1028.7354 | 1037.6732 |
| H                                   | 3.18564                                                                                                                              | 1.41254                                                                            | 2.09319  | 1046.0114 | 1059.6756 | 1075.7923 |
| C                                   | -2.10519                                                                                                                             | 2.01519                                                                            | -0.60360 | 1079.2945 | 1082.2341 | 1098.4625 |
| O                                   | -0.47102                                                                                                                             | 1.49403                                                                            | 1.21982  | 1144.0163 | 1176.8958 | 1181.8724 |
| C                                   | -1.67375                                                                                                                             | 1.38110                                                                            | 0.71360  | 1201.4132 | 1234.5719 | 1243.2631 |
| C                                   | -2.50510                                                                                                                             | 0.78421                                                                            | -1.44325 | 1248.9255 | 1288.4025 | 1288.8853 |
| H                                   | -3.58472                                                                                                                             | 0.64549                                                                            | -1.50869 | 1310.3504 | 1321.6165 | 1327.8337 |
| H                                   | -2.04347                                                                                                                             | 0.77491                                                                            | -2.43120 | 1357.6750 | 1368.0173 | 1392.3396 |
| H                                   | 0.20305                                                                                                                              | 1.81097                                                                            | 0.56793  | 1460.8659 | 1464.5711 | 1468.2703 |
| C                                   | -2.80678                                                                                                                             | 1.45525                                                                            | 1.72174  | 1472.8634 | 1499.4367 | 1509.9330 |
| H                                   | -3.02515                                                                                                                             | 0.50848                                                                            | 2.21439  | 1521.4372 | 1575.7834 | 1662.7329 |
| C                                   | -3.97978                                                                                                                             | 2.04607                                                                            | 0.92653  | 3086.2317 | 3088.2219 | 3117.5803 |
| H                                   | -4.57376                                                                                                                             | 1.23764                                                                            | 0.49328  | 3120.7411 | 3123.0082 | 3147.8659 |
| H                                   | -4.63658                                                                                                                             | 2.64626                                                                            | 1.55871  | 3169.0347 | 3174.3664 | 3175.0553 |
| C                                   | -3.30236                                                                                                                             | 2.87862                                                                            | -0.17761 | 3183.0280 | 3185.0577 | 3187.7623 |
| H                                   | -3.96254                                                                                                                             | 3.09164                                                                            | -1.02213 | 3198.6349 | 3265.4715 | 3282.6416 |
| H                                   | -2.94780                                                                                                                             | 3.83273                                                                            | 0.22797  | 3282.8952 | 3297.4917 | 3363.2400 |
| H                                   | -2.44763                                                                                                                             | 2.16267                                                                            | 2.47923  |           |           |           |
| H                                   | -1.27833                                                                                                                             | 2.56401                                                                            | -1.06537 |           |           |           |

**Statistical Thermodynamic Analysis**

Temperature=298.15 K

Pressure=1 atm

Zero-point correction= 0.270096

Electronic Energy = -2545.70540644

Internal Energy (E)= -2545.41185844

Enthalpy (H)= -2545.41091344

Gibbs Free Energy (G)=-2545.49080944

Gibbs Free Energy of Solvation=-2545.54334678

| St.Pt.                              | General Structure                                                                                                                     | Ball & Stick model                                                                 |          |           |           |           |
|-------------------------------------|---------------------------------------------------------------------------------------------------------------------------------------|------------------------------------------------------------------------------------|----------|-----------|-----------|-----------|
| 1DTS <sub>3</sub>                   | 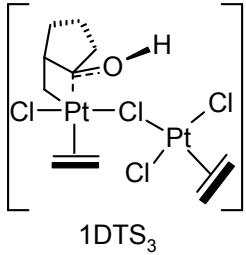 <p style="text-align: center;">1DTS<sub>3</sub></p> |  |          |           |           |           |
| <b><u>Cartesian co-ordinate</u></b> |                                                                                                                                       | <b><u>Frequencies</u></b>                                                          |          |           |           |           |
| -----<br>Atoms                      | X                                                                                                                                     | Y                                                                                  | Z        | -----     | -----     | -----     |
| -----                               | -----                                                                                                                                 | -----                                                                              | -----    | -----     | -----     | -----     |
| C                                   | -2.80132                                                                                                                              | -2.50136                                                                           | 1.18695  | -67.8656  | 35.7369   | 38.4701   |
| C                                   | -2.95052                                                                                                                              | -1.40513                                                                           | 1.96348  | 52.7568   | 70.3917   | 76.4108   |
| Pt                                  | -1.78206                                                                                                                              | -0.62958                                                                           | -0.09090 | 82.1049   | 88.7704   | 94.7636   |
| Cl                                  | -3.83541                                                                                                                              | -0.30071                                                                           | -1.14493 | 114.8626  | 119.0450  | 129.9149  |
| Cl                                  | 0.32965                                                                                                                               | -1.25846                                                                           | 0.98807  | 147.2559  | 149.3793  | 161.7668  |
| H                                   | -2.22237                                                                                                                              | -1.15031                                                                           | 2.72861  | 167.9194  | 174.3566  | 190.0630  |
| H                                   | -3.85171                                                                                                                              | -0.80192                                                                           | 1.90471  | 195.6389  | 217.5723  | 230.0964  |
| H                                   | -3.57429                                                                                                                              | -2.79457                                                                           | 0.48285  | 259.9620  | 274.2177  | 293.8592  |
| H                                   | -1.94781                                                                                                                              | -3.16306                                                                           | 1.30435  | 303.9526  | 316.2292  | 335.1103  |
| Pt                                  | 2.33478                                                                                                                               | -0.15467                                                                           | 0.04795  | 342.3888  | 358.5795  | 400.9604  |
| Cl                                  | 2.44793                                                                                                                               | -1.71851                                                                           | -1.67476 | 459.3745  | 477.0248  | 496.5772  |
| Cl                                  | 2.16763                                                                                                                               | 1.49685                                                                            | 1.77550  | 508.4639  | 578.8391  | 623.2204  |
| H                                   | 4.84934                                                                                                                               | -0.56156                                                                           | -0.67247 | 661.5333  | 773.1055  | 793.0392  |
| C                                   | 4.38199                                                                                                                               | 0.32763                                                                            | -0.26175 | 812.3810  | 825.3895  | 835.4325  |
| C                                   | 3.59016                                                                                                                               | 1.14284                                                                            | -1.07972 | 838.5229  | 859.2453  | 870.5036  |
| H                                   | 4.76423                                                                                                                               | 0.70687                                                                            | 0.68080  | 920.0310  | 956.5347  | 1008.7668 |
| H                                   | 3.36203                                                                                                                               | 2.15916                                                                            | -0.77362 | 1021.0963 | 1025.3383 | 1030.5390 |
| H                                   | 3.44636                                                                                                                               | 0.88706                                                                            | -2.12461 | 1048.9973 | 1066.4663 | 1072.3710 |
| C                                   | -0.58837                                                                                                                              | 1.87305                                                                            | -0.63419 | 1074.8763 | 1078.2270 | 1100.3456 |
| O                                   | -0.90717                                                                                                                              | 1.56058                                                                            | 1.82317  | 1156.0989 | 1176.8185 | 1190.6824 |
| C                                   | -1.39704                                                                                                                              | 1.70934                                                                            | 0.63807  | 1209.7011 | 1231.8658 | 1232.3775 |
| C                                   | -0.84869                                                                                                                              | 0.56765                                                                            | -1.42469 | 1250.1379 | 1288.0467 | 1290.0923 |
| H                                   | -1.50666                                                                                                                              | 0.74007                                                                            | -2.27833 | 1305.1985 | 1318.9714 | 1337.6496 |
| H                                   | 0.07528                                                                                                                               | 0.07788                                                                            | -1.74427 | 1365.8995 | 1366.7616 | 1428.5834 |
| C                                   | -2.73111                                                                                                                              | 2.40610                                                                            | 0.52402  | 1460.7251 | 1465.9493 | 1468.0380 |
| H                                   | -3.57638                                                                                                                              | 1.75778                                                                            | 0.75806  | 1488.6983 | 1500.9048 | 1523.6828 |
| C                                   | -2.73806                                                                                                                              | 2.96827                                                                            | -0.90580 | 1573.0477 | 1575.5526 | 1661.0531 |
| H                                   | -3.22760                                                                                                                              | 2.25629                                                                            | -1.57324 | 3077.6375 | 3080.9375 | 3102.6668 |
| H                                   | -3.27422                                                                                                                              | 3.91681                                                                            | -0.96573 | 3120.5733 | 3127.7562 | 3142.6430 |
| C                                   | -1.24735                                                                                                                              | 3.11184                                                                            | -1.26416 | 3167.9834 | 3171.2853 | 3177.4391 |
| H                                   | -1.06803                                                                                                                              | 3.14947                                                                            | -2.34132 | 3177.7884 | 3178.5899 | 3180.2896 |
| H                                   | -0.83213                                                                                                                              | 4.02196                                                                            | -0.81670 | 3187.2126 | 3260.4460 | 3277.1901 |
| H                                   | -2.69350                                                                                                                              | 3.20480                                                                            | 1.27594  | 3280.0350 | 3294.9491 | 3297.1111 |
| H                                   | 0.47274                                                                                                                               | 2.00523                                                                            | -0.40411 |           |           |           |
| H                                   | 0.06482                                                                                                                               | 1.34828                                                                            | 1.82531  |           |           |           |

**Statistical Thermodynamic Analysis**

Temperature=298.15 K

Pressure=1 atm

Zero-point correction= 0.269753

Electronic Energy = -2545.70506011

Internal Energy (E)= -2545.41249811

Enthalpy (H)= -2545.41155311

Gibbs Free Energy (G)=-2545.48994011

Gibbs Free Energy of Solvation=-2545.5416783

| St.Pt.                                           | General Structure                                                                                                                    | Ball & Stick model                                                                 |                |           |           |           |
|--------------------------------------------------|--------------------------------------------------------------------------------------------------------------------------------------|------------------------------------------------------------------------------------|----------------|-----------|-----------|-----------|
| 1D1 <sub>4</sub>                                 | 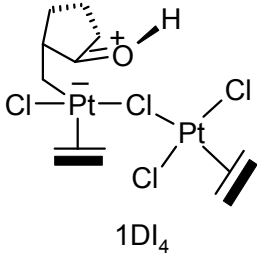 <p style="text-align: center;">1D1<sub>4</sub></p> |  |                |           |           |           |
| <b><u>Cartesian co-ordinate</u></b>              |                                                                                                                                      | <b><u>Frequencies</u></b>                                                          |                |           |           |           |
| -----<br>Atoms                                   | X                                                                                                                                    | Y                                                                                  | Z              |           |           |           |
| -----                                            |                                                                                                                                      |                                                                                    |                |           |           |           |
| C                                                | 0.05949                                                                                                                              | -3.28163                                                                           | 0.19417        | 17.5183   | 37.7144   | 48.5161   |
| C                                                | -0.17807                                                                                                                             | -2.72482                                                                           | -1.01929       | 52.8436   | 62.5449   | 68.8070   |
| Pt                                               | 1.37278                                                                                                                              | -1.26941                                                                           | 0.14744        | 73.1864   | 84.7506   | 105.6271  |
| Cl                                               | 3.00893                                                                                                                              | -2.16894                                                                           | -1.24458       | 122.3969  | 125.3039  | 127.1672  |
| Cl                                               | -0.27920                                                                                                                             | -0.18935                                                                           | 1.69441        | 148.5519  | 158.3970  | 168.1529  |
| H                                                | -1.06756                                                                                                                             | -2.12327                                                                           | -1.18111       | 172.8117  | 180.6389  | 201.8183  |
| H                                                | 0.43559                                                                                                                              | -2.96814                                                                           | -1.87988       | 208.0486  | 213.5039  | 220.1704  |
| H                                                | 0.86156                                                                                                                              | -4.00022                                                                           | 0.33267        | 223.6114  | 235.9264  | 288.5213  |
| H                                                | -0.63240                                                                                                                             | -3.12247                                                                           | 1.01705        | 296.5464  | 323.0921  | 330.8407  |
| Pt                                               | -2.01249                                                                                                                             | 0.39416                                                                            | -0.02854       | 337.2835  | 347.5168  | 410.1440  |
| Cl                                               | -3.16896                                                                                                                             | -1.53491                                                                           | 0.61088        | 447.0843  | 514.3956  | 522.6044  |
| Cl                                               | -0.90249                                                                                                                             | 2.39501                                                                            | -0.72952       | 538.0067  | 566.4261  | 607.9706  |
| H                                                | -3.35870                                                                                                                             | -0.61278                                                                           | -2.07813       | 661.6145  | 724.8851  | 782.6627  |
| C                                                | -3.08068                                                                                                                             | 0.41364                                                                            | -1.85933       | 785.9336  | 833.5361  | 837.9928  |
| C                                                | -3.79571                                                                                                                             | 1.14112                                                                            | -0.89603       | 861.6684  | 894.3245  | 903.3691  |
| H                                                | -2.46175                                                                                                                             | 0.93317                                                                            | -2.58382       | 939.0015  | 967.9864  | 1017.2791 |
| H                                                | -3.72959                                                                                                                             | 2.22414                                                                            | -0.87437       | 1023.1994 | 1026.2123 | 1029.2810 |
| H                                                | -4.62170                                                                                                                             | 0.67485                                                                            | -0.36890       | 1037.2655 | 1075.9537 | 1080.2946 |
| C                                                | 2.38078                                                                                                                              | 1.53259                                                                            | -0.07245       | 1084.5497 | 1091.2240 | 1121.7217 |
| O                                                | 1.03706                                                                                                                              | 2.43130                                                                            | 1.77663        | 1160.2342 | 1189.0444 | 1200.3950 |
| C                                                | 1.78089                                                                                                                              | 2.59209                                                                            | 0.77183        | 1214.7505 | 1229.0421 | 1238.2836 |
| C                                                | 2.69030                                                                                                                              | 0.19620                                                                            | 0.62034        | 1246.8189 | 1277.0079 | 1283.5676 |
| H                                                | 1.60854                                                                                                                              | 1.39885                                                                            | -0.85313       | 1315.4174 | 1319.0171 | 1336.4344 |
| H                                                | 3.68362                                                                                                                              | -0.12555                                                                           | 0.30141        | 1351.6992 | 1360.0583 | 1431.1307 |
| H                                                | 2.71941                                                                                                                              | 0.31881                                                                            | 1.71152        | 1464.1529 | 1466.7923 | 1474.5105 |
| C                                                | 3.54733                                                                                                                              | 2.29111                                                                            | -0.74424       | 1483.9367 | 1505.9483 | 1517.1865 |
| C                                                | 2.99350                                                                                                                              | 3.71105                                                                            | -0.93302       | 1570.2703 | 1649.5683 | 1705.8727 |
| C                                                | 2.21940                                                                                                                              | 3.95620                                                                            | 0.37211        | 2963.1536 | 2999.3629 | 3059.0837 |
| H                                                | 0.69378                                                                                                                              | 1.48190                                                                            | 1.86700        | 3060.1542 | 3081.2471 | 3102.3863 |
| H                                                | 3.84379                                                                                                                              | 1.80410                                                                            | -1.67403       | 3150.1501 | 3150.4734 | 3165.7436 |
| H                                                | 2.88624                                                                                                                              | 4.31066                                                                            | 1.17168        | 3171.0129 | 3177.8758 | 3181.4180 |
| H                                                | 1.36708                                                                                                                              | 4.63856                                                                            | 0.32667        | 3187.3171 | 3188.7794 | 3268.0028 |
| H                                                | 3.76622                                                                                                                              | 4.46070                                                                            | -1.10570       | 3279.7652 | 3292.1593 | 3295.6777 |
| H                                                | 2.29863                                                                                                                              | 3.73281                                                                            | -1.77793       |           |           |           |
| H                                                | 4.41430                                                                                                                              | 2.29617                                                                            | -0.07305       |           |           |           |
| <b><u>Statistical Thermodynamic Analysis</u></b> |                                                                                                                                      |                                                                                    |                |           |           |           |
| Temperature=298.15 K                             |                                                                                                                                      |                                                                                    | Pressure=1 atm |           |           |           |

Zero-point correction= 0.269127

Internal Energy (E)= -2545.41104877

Gibbs Free Energy (G)=-2545.49175577

Electronic Energy = -2545.70389177

Enthalpy (H)= -2545.41010377

Gibbs Free Energy of Solvation=-2545.54640911



| St.Pt.                              | General Structure                                                                 | Ball & Stick model                                                                 |          |           |           |           |
|-------------------------------------|-----------------------------------------------------------------------------------|------------------------------------------------------------------------------------|----------|-----------|-----------|-----------|
| 1DTS <sub>4</sub>                   | 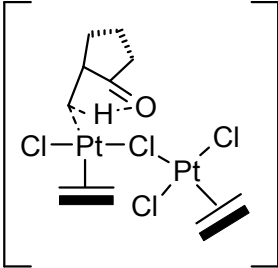 |  |          |           |           |           |
| <b><u>Cartesian co-ordinate</u></b> |                                                                                   | <b><u>Frequencies</u></b>                                                          |          |           |           |           |
| -----<br>Atoms                      | X                                                                                 | Y                                                                                  | Z        |           |           |           |
| -----                               |                                                                                   |                                                                                    |          |           |           |           |
| C                                   | 2.34110                                                                           | -2.46102                                                                           | -0.84544 | -793.7604 | 28.3556   | 37.0034   |
| C                                   | 3.07286                                                                           | -1.56929                                                                           | -1.58180 | 42.1350   | 49.6506   | 63.6878   |
| Pt                                  | 1.81726                                                                           | -0.34546                                                                           | -0.07041 | 69.4230   | 82.4842   | 88.3510   |
| Cl                                  | 3.58284                                                                           | -0.45517                                                                           | 1.43417  | 94.3940   | 105.8807  | 123.9774  |
| Cl                                  | -0.01266                                                                          | -0.23714                                                                           | -1.66749 | 134.7343  | 143.6240  | 154.7607  |
| H                                   | 2.71606                                                                           | -1.21626                                                                           | -2.54491 | 160.7516  | 163.5006  | 178.5452  |
| H                                   | 4.08625                                                                           | -1.30811                                                                           | -1.29411 | 180.9965  | 197.8958  | 218.7525  |
| H                                   | 2.76162                                                                           | -2.92118                                                                           | 0.04393  | 239.0954  | 253.9025  | 266.0449  |
| H                                   | 1.38294                                                                           | -2.83243                                                                           | -1.19592 | 274.9795  | 314.6099  | 321.0270  |
| Pt                                  | -1.88282                                                                          | -0.71116                                                                           | -0.08591 | 329.4854  | 349.2995  | 384.4322  |
| Cl                                  | -0.61501                                                                          | -2.43677                                                                           | 0.91735  | 407.2274  | 453.3989  | 513.3408  |
| Cl                                  | -3.11178                                                                          | 1.06937                                                                            | -1.01568 | 564.7049  | 577.6558  | 595.4301  |
| H                                   | -3.48293                                                                          | -2.58271                                                                           | 0.88650  | 606.9996  | 616.3973  | 741.0109  |
| C                                   | -3.65158                                                                          | -1.51827                                                                           | 0.75757  | 781.2614  | 805.9799  | 840.2968  |
| C                                   | -3.08717                                                                          | -0.60441                                                                           | 1.65843  | 846.1301  | 860.8634  | 903.9238  |
| H                                   | -4.47411                                                                          | -1.21230                                                                           | 0.11885  | 926.2817  | 964.2152  | 969.8427  |
| H                                   | -3.47711                                                                          | 0.40673                                                                            | 1.71677  | 1019.8008 | 1020.8517 | 1037.9845 |
| H                                   | -2.48135                                                                          | -0.96169                                                                           | 2.48527  | 1052.6183 | 1060.2277 | 1065.7803 |
| C                                   | 0.05810                                                                           | 2.27784                                                                            | 0.56930  | 1076.4447 | 1080.8639 | 1093.2082 |
| O                                   | 1.94203                                                                           | 2.76609                                                                            | -0.80401 | 1156.6118 | 1181.9053 | 1192.4830 |
| C                                   | 0.87970                                                                           | 3.15041                                                                            | -0.34903 | 1202.5929 | 1214.0977 | 1234.2763 |
| C                                   | 0.94507                                                                           | 1.20820                                                                            | 1.16556  | 1237.4830 | 1238.6268 | 1285.2551 |
| H                                   | 1.68690                                                                           | 1.61157                                                                            | 1.85856  | 1307.1518 | 1317.6398 | 1324.9510 |
| H                                   | 0.37018                                                                           | 0.43173                                                                            | 1.68468  | 1346.7292 | 1358.4419 | 1396.3039 |
| C                                   | 0.25563                                                                           | 4.52078                                                                            | -0.46503 | 1415.0050 | 1456.6544 | 1467.6920 |
| H                                   | 1.00147                                                                           | 5.24866                                                                            | -0.12690 | 1478.0910 | 1479.2989 | 1504.2802 |
| C                                   | -0.96236                                                                          | 4.44244                                                                            | 0.47572  | 1520.6219 | 1572.2076 | 1631.3316 |
| H                                   | -1.17184                                                                          | 5.39280                                                                            | 0.96869  | 1872.1365 | 3073.8093 | 3085.3853 |
| H                                   | -1.85121                                                                          | 4.15030                                                                            | -0.09154 | 3094.4260 | 3097.1681 | 3106.1375 |
| C                                   | -0.61722                                                                          | 3.31672                                                                            | 1.47444  | 3148.6662 | 3159.3575 | 3168.6368 |
| H                                   | 0.08642                                                                           | 3.67282                                                                            | 2.23685  | 3169.4083 | 3176.2872 | 3181.1854 |
| H                                   | -1.49960                                                                          | 2.91821                                                                            | 1.97911  | 3184.1145 | 3193.6326 | 3273.6242 |
| H                                   | 0.01907                                                                           | 4.75610                                                                            | -1.50551 | 3283.0866 | 3289.1760 | 3300.3617 |
| H                                   | -0.73086                                                                          | 1.84168                                                                            | -0.06139 |           |           |           |

|                                                  |         |         |                                               |  |
|--------------------------------------------------|---------|---------|-----------------------------------------------|--|
| H                                                | 1.89311 | 1.32598 | -0.05458                                      |  |
| <b><u>Statistical Thermodynamic Analysis</u></b> |         |         |                                               |  |
| Temperature=298.15 K                             |         |         | Pressure=1 atm                                |  |
| Zero-point correction= 0.264064                  |         |         | Electronic Energy = -2545.67887661            |  |
| Internal Energy (E)= -2545.39125461              |         |         | Enthalpy (H)= -2545.39031061                  |  |
| Gibbs Free Energy (G)=-2545.47145361             |         |         | Gibbs Free Energy of Solvation=-2545.52868976 |  |

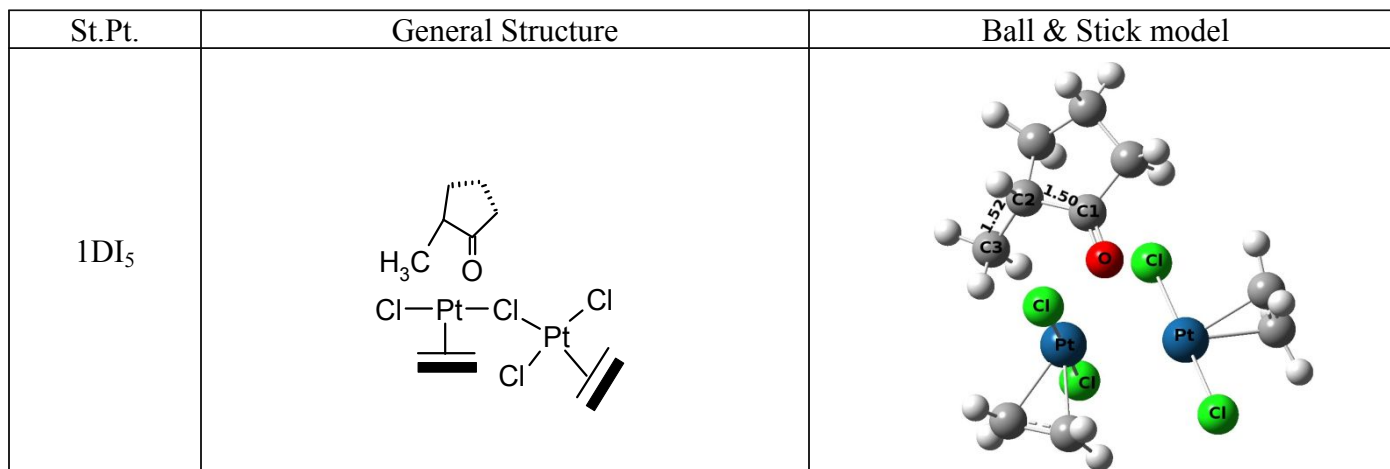

**Cartesian co-ordinate**

**Frequencies**

| Atoms | X        | Y        | Z        |
|-------|----------|----------|----------|
| C     | 3.36873  | -0.66258 | -1.65596 |
| C     | 3.09047  | 0.70211  | -1.50220 |
| Pt    | 1.90964  | -0.42649 | -0.13060 |
| Cl    | 3.58798  | -0.25009 | 1.44373  |
| Cl    | 0.05200  | -0.60909 | -1.71233 |
| H     | 2.39481  | 1.21506  | -2.15763 |
| H     | 3.73966  | 1.32917  | -0.89961 |
| H     | 4.24268  | -1.10073 | -1.18452 |
| H     | 2.90412  | -1.22908 | -2.45795 |
| Pt    | -1.64803 | -0.83586 | 0.06013  |
| Cl    | 0.22287  | -1.09391 | 1.59149  |
| Cl    | -3.37686 | -0.52841 | -1.44667 |
| H     | -2.38028 | -2.42363 | 2.05623  |
| C     | -2.97735 | -1.76507 | 1.43257  |
| C     | -2.97961 | -0.38251 | 1.65989  |
| H     | -3.76948 | -2.22019 | 0.84654  |
| H     | -3.77904 | 0.22917  | 1.25379  |
| H     | -2.38676 | 0.04397  | 2.46442  |
| C     | -0.34377 | 2.59745  | 0.92918  |
| O     | 0.98352  | 2.64073  | -1.10383 |
| C     | -0.10075 | 2.70549  | -0.56921 |
| C     | 0.85977  | 2.98324  | 1.77101  |
| H     | 1.12453  | 4.03167  | 1.60258  |
| H     | 0.65460  | 2.84414  | 2.83520  |
| C     | -1.42623 | 2.95574  | -1.27690 |
| H     | -1.33332 | 3.89108  | -1.83961 |
| C     | -2.46441 | 3.04502  | -0.14802 |
| H     | -3.25115 | 3.77433  | -0.35018 |
| H     | -2.94722 | 2.06968  | -0.02471 |
| C     | -1.64336 | 3.38849  | 1.11093  |
| H     | -1.41341 | 4.46162  | 1.13408  |
| H     | -2.16426 | 3.14524  | 2.04110  |
| H     | -1.62066 | 2.15628  | -1.99948 |
| H     | -0.57688 | 1.53224  | 1.09745  |
| H     | 1.72572  | 2.36898  | 1.50606  |

|           |           |           |
|-----------|-----------|-----------|
| 27.4072   | 32.9149   | 37.0080   |
| 38.1777   | 50.7678   | 60.6081   |
| 70.9746   | 81.8184   | 88.1960   |
| 89.5255   | 93.2913   | 117.6007  |
| 123.4300  | 130.4140  | 146.5982  |
| 156.0459  | 164.8349  | 187.7051  |
| 196.6297  | 198.3021  | 202.0695  |
| 231.3722  | 256.2310  | 259.7065  |
| 272.2284  | 279.1214  | 342.8784  |
| 353.3500  | 355.6382  | 402.4951  |
| 404.3849  | 457.7823  | 503.8406  |
| 509.6969  | 559.7590  | 577.4180  |
| 601.6924  | 724.3190  | 770.5040  |
| 773.7596  | 824.1151  | 827.1831  |
| 835.5759  | 868.8783  | 912.0299  |
| 952.0005  | 963.5444  | 994.5833  |
| 1018.6142 | 1032.5407 | 1039.4511 |
| 1071.7338 | 1073.2528 | 1077.7904 |
| 1083.1666 | 1096.2677 | 1167.6362 |
| 1188.9664 | 1192.3781 | 1210.9189 |
| 1220.4638 | 1226.3711 | 1243.6191 |
| 1287.0880 | 1291.0537 | 1303.8003 |
| 1307.1962 | 1326.6443 | 1347.1080 |
| 1381.5164 | 1426.0918 | 1452.7119 |
| 1467.9238 | 1477.7642 | 1501.4865 |
| 1505.3832 | 1508.4635 | 1517.5052 |
| 1572.8711 | 1577.1663 | 1880.6480 |
| 3032.4037 | 3067.3644 | 3071.5037 |
| 3083.9342 | 3100.5010 | 3127.1436 |
| 3134.5982 | 3152.3049 | 3156.3748 |
| 3159.4074 | 3169.5297 | 3177.8803 |
| 3186.8874 | 3199.9951 | 3268.0164 |
| 3276.4761 | 3290.9576 | 3305.0673 |

**Statistical Thermodynamic Analysis**

Temperature=298.15 K

Pressure=1 atm

Zero-point correction= 0.269153

Internal Energy (E)= -2545.44428817

Gibbs Free Energy (G)=-2545.52758717

Electronic Energy = -2545.73792317

Enthalpy (H)= -2545.44334417

Gibbs Free Energy of Solvation=-2545.58349943

| St.Pt.                                           | General Structure                                                                 | Ball & Stick model                                                                 |                                    |           |           |           |
|--------------------------------------------------|-----------------------------------------------------------------------------------|------------------------------------------------------------------------------------|------------------------------------|-----------|-----------|-----------|
| 1DTS <sub>4a</sub>                               | 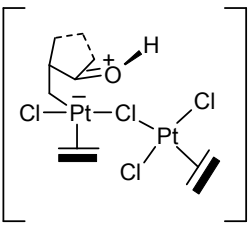 |  |                                    |           |           |           |
| <b><u>Cartesian co-ordinate</u></b>              |                                                                                   | <b><u>Frequencies</u></b>                                                          |                                    |           |           |           |
| -----<br>Atoms                                   | X                                                                                 | Y                                                                                  | Z                                  |           |           |           |
| -----                                            |                                                                                   |                                                                                    |                                    |           |           |           |
| C                                                | -1.93372                                                                          | -2.44142                                                                           | 1.26768                            | -117.2928 | 25.3793   | 33.3701   |
| C                                                | -2.69305                                                                          | -1.54735                                                                           | 1.95329                            | 47.9983   | 60.2084   | 74.2542   |
| Pt                                               | -1.97696                                                                          | -0.42701                                                                           | -0.01529                           | 82.5586   | 93.8506   | 95.6552   |
| Cl                                               | -3.94037                                                                          | -1.11628                                                                           | -1.05840                           | 105.8186  | 117.7096  | 125.2675  |
| Cl                                               | 0.05985                                                                           | 0.40151                                                                            | 1.15305                            | 145.5959  | 152.2678  | 158.2237  |
| H                                                | -2.26411                                                                          | -0.95100                                                                           | 2.75355                            | 163.7517  | 173.8007  | 182.7117  |
| H                                                | -3.76841                                                                          | -1.50224                                                                           | 1.81559                            | 190.6582  | 207.9768  | 213.6151  |
| H                                                | -2.38510                                                                          | -3.12571                                                                           | 0.55602                            | 226.8244  | 261.2836  | 272.5029  |
| H                                                | -0.87985                                                                          | -2.57835                                                                           | 1.48773                            | 289.0656  | 330.3291  | 346.2228  |
| Pt                                               | 2.12661                                                                           | -0.44747                                                                           | 0.07231                            | 361.4698  | 371.1003  | 400.2225  |
| Cl                                               | 1.17713                                                                           | -2.53673                                                                           | -0.26547                           | 464.8137  | 506.6079  | 534.0063  |
| Cl                                               | 3.16095                                                                           | 1.73660                                                                            | 0.33457                            | 546.3871  | 580.6832  | 618.6090  |
| H                                                | 3.95868                                                                           | -2.36207                                                                           | 0.16346                            | 652.9657  | 737.4174  | 757.3497  |
| C                                                | 4.05194                                                                           | -1.32600                                                                           | -0.14570                           | 771.6109  | 801.0197  | 827.1176  |
| C                                                | 3.58482                                                                           | -0.92597                                                                           | -1.40401                           | 832.6825  | 901.2778  | 907.4793  |
| H                                                | 4.75047                                                                           | -0.70142                                                                           | 0.40263                            | 935.5554  | 972.3224  | 1008.9887 |
| H                                                | 3.92500                                                                           | 0.00996                                                                            | -1.83579                           | 1017.5964 | 1023.7722 | 1031.9825 |
| H                                                | 3.13048                                                                           | -1.65049                                                                           | -2.07194                           | 1053.8064 | 1067.0639 | 1072.5541 |
| C                                                | -1.46984                                                                          | 2.40599                                                                            | -0.99306                           | 1078.9246 | 1082.8637 | 1116.1225 |
| O                                                | 0.88071                                                                           | 2.22271                                                                            | -1.37676                           | 1166.7081 | 1179.2558 | 1222.5236 |
| C                                                | -0.05796                                                                          | 2.66171                                                                            | -0.64709                           | 1227.2660 | 1232.5872 | 1244.0485 |
| C                                                | -1.77264                                                                          | 0.97593                                                                            | -1.48375                           | 1255.6039 | 1279.6172 | 1287.9360 |
| H                                                | -2.70296                                                                          | 1.00184                                                                            | -2.05333                           | 1296.7786 | 1323.3357 | 1344.1290 |
| H                                                | -0.97542                                                                          | 0.65164                                                                            | -2.16380                           | 1349.9120 | 1357.7641 | 1435.8708 |
| C                                                | 0.12584                                                                           | 3.58859                                                                            | 0.50265                            | 1463.7113 | 1468.0273 | 1471.6731 |
| H                                                | 0.88930                                                                           | 3.20080                                                                            | 1.18315                            | 1480.8733 | 1502.1416 | 1526.7585 |
| C                                                | -1.27945                                                                          | 3.74434                                                                            | 1.11524                            | 1574.0751 | 1647.3168 | 1671.7736 |
| H                                                | -1.28516                                                                          | 3.34912                                                                            | 2.13196                            | 2966.2470 | 2984.5028 | 3070.3679 |
| H                                                | -1.55419                                                                          | 4.79873                                                                            | 1.17331                            | 3079.1434 | 3112.4061 | 3118.9483 |
| C                                                | -2.26425                                                                          | 2.94309                                                                            | 0.21687                            | 3143.7581 | 3157.0516 | 3158.8572 |
| H                                                | -2.67840                                                                          | 2.09186                                                                            | 0.76150                            | 3172.0999 | 3173.4587 | 3176.9582 |
| H                                                | -3.10486                                                                          | 3.55670                                                                            | -0.11063                           | 3187.7753 | 3190.3456 | 3267.4769 |
| H                                                | 0.52358                                                                           | 4.52461                                                                            | 0.08561                            | 3274.4213 | 3291.0689 | 3293.1371 |
| H                                                | -1.61103                                                                          | 3.08399                                                                            | -1.85800                           |           |           |           |
| H                                                | 1.78519                                                                           | 2.30953                                                                            | -0.93096                           |           |           |           |
| <b><u>Statistical Thermodynamic Analysis</u></b> |                                                                                   |                                                                                    |                                    |           |           |           |
| Temperature=298.15 K                             |                                                                                   |                                                                                    | Pressure=1 atm                     |           |           |           |
| Zero-point correction= 0.268913                  |                                                                                   |                                                                                    | Electronic Energy = -2545.70148089 |           |           |           |
| Internal Energy (E)= -2545.40961489              |                                                                                   |                                                                                    | Enthalpy (H)= -2545.40866989       |           |           |           |

Gibbs Free Energy (G)=-2545.48810589    Gibbs Free Energy of Solvation=-2545.54412782

| St.Pt.                                           | General Structure                                                                 | Ball & Stick model                                                                 |                |           |           |           |
|--------------------------------------------------|-----------------------------------------------------------------------------------|------------------------------------------------------------------------------------|----------------|-----------|-----------|-----------|
| 1DI <sub>5a</sub>                                | 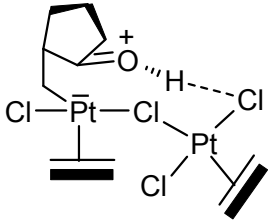 |  |                |           |           |           |
| <b><u>Cartesian co-ordinate</u></b>              |                                                                                   | <b><u>Frequencies</u></b>                                                          |                |           |           |           |
| Atoms                                            | X                                                                                 | Y                                                                                  | Z              | 19.1137   | 39.4063   | 53.4183   |
| C                                                | -1.90517                                                                          | -2.57993                                                                           | 1.10027        | 60.6934   | 70.7892   | 83.4752   |
| C                                                | -2.60095                                                                          | -1.73823                                                                           | 1.90975        | 94.0404   | 103.6269  | 115.7979  |
| Pt                                               | -2.01268                                                                          | -0.48810                                                                           | -0.01976       | 119.3291  | 122.2955  | 136.6402  |
| Cl                                               | -4.03746                                                                          | -1.09762                                                                           | -0.98882       | 148.2167  | 150.7528  | 163.8484  |
| Cl                                               | 0.07115                                                                           | 0.25826                                                                            | 1.13549        | 173.2759  | 180.4917  | 196.4661  |
| H                                                | -2.10513                                                                          | -1.20391                                                                           | 2.71498        | 204.0977  | 211.4046  | 224.5734  |
| H                                                | -3.68363                                                                          | -1.68326                                                                           | 1.86315        | 238.1106  | 264.8683  | 275.4748  |
| H                                                | -2.41974                                                                          | -3.21169                                                                           | 0.38293        | 296.9225  | 331.4117  | 346.8146  |
| H                                                | -0.83769                                                                          | -2.73266                                                                           | 1.22461        | 366.5088  | 374.6913  | 398.0592  |
| Pt                                               | 2.19293                                                                           | -0.41342                                                                           | 0.06319        | 473.8562  | 505.9493  | 518.8756  |
| Cl                                               | 1.41060                                                                           | -2.57010                                                                           | -0.27707       | 556.7506  | 580.3540  | 595.2705  |
| Cl                                               | 3.06091                                                                           | 1.84270                                                                            | 0.36290        | 631.6916  | 718.6452  | 773.0326  |
| H                                                | 4.17416                                                                           | -2.17597                                                                           | 0.14764        | 780.5519  | 832.7790  | 834.6550  |
| C                                                | 4.18429                                                                           | -1.13471                                                                           | -0.15777       | 856.5943  | 889.1463  | 914.9689  |
| C                                                | 3.68646                                                                           | -0.76866                                                                           | -1.41395       | 936.1236  | 973.4312  | 1010.2290 |
| H                                                | 4.83073                                                                           | -0.45836                                                                           | 0.39292        | 1024.1186 | 1025.1987 | 1027.1652 |
| H                                                | 3.95011                                                                           | 0.19257                                                                            | -1.84389       | 1031.9897 | 1072.0273 | 1077.2893 |
| H                                                | 3.28873                                                                           | -1.52407                                                                           | -2.08369       | 1078.8568 | 1080.7982 | 1111.3846 |
| C                                                | -1.58028                                                                          | 2.38819                                                                            | -0.89498       | 1154.5958 | 1189.6144 | 1198.4928 |
| O                                                | 0.77033                                                                           | 2.25693                                                                            | -1.31191       | 1226.0137 | 1230.3942 | 1238.1656 |
| C                                                | -0.16792                                                                          | 2.68855                                                                            | -0.58282       | 1249.3685 | 1264.0400 | 1289.1446 |
| C                                                | -1.86652                                                                          | 0.98048                                                                            | -1.43052       | 1315.5810 | 1324.4131 | 1332.7355 |
| H                                                | -2.80465                                                                          | 1.00716                                                                            | -1.98680       | 1349.3284 | 1359.6549 | 1427.8720 |
| H                                                | -1.07259                                                                          | 0.69269                                                                            | -2.13076       | 1464.4486 | 1467.5385 | 1477.1796 |
| C                                                | -0.01053                                                                          | 3.60592                                                                            | 0.58278        | 1480.9049 | 1504.8676 | 1518.0357 |
| H                                                | 0.36925                                                                           | 2.99287                                                                            | 1.41058        | 1574.1943 | 1646.4511 | 1684.9311 |
| C                                                | -1.45352                                                                          | 4.08051                                                                            | 0.84271        | 2915.2514 | 2955.6051 | 3077.4475 |
| H                                                | -1.61828                                                                          | 4.32690                                                                            | 1.89186        | 3083.9908 | 3094.8991 | 3104.0327 |
| H                                                | -1.66077                                                                          | 4.97720                                                                            | 0.24972        | 3145.0191 | 3157.9606 | 3168.7010 |
| C                                                | -2.31566                                                                          | 2.90274                                                                            | 0.35729        | 3175.3579 | 3180.4506 | 3183.0469 |
| H                                                | -2.33576                                                                          | 2.10253                                                                            | 1.10449        | 3187.6271 | 3190.1222 | 3276.5951 |
| H                                                | -3.34738                                                                          | 3.17977                                                                            | 0.13678        | 3278.5261 | 3294.8448 | 3294.9356 |
| H                                                | 0.73385                                                                           | 4.38345                                                                            | 0.38863        |           |           |           |
| H                                                | -1.77400                                                                          | 3.11667                                                                            | -1.71129       |           |           |           |
| H                                                | 1.68057                                                                           | 2.36693                                                                            | -0.87338       |           |           |           |
| <b><u>Statistical Thermodynamic Analysis</u></b> |                                                                                   |                                                                                    |                |           |           |           |
| Temperature=298.15 K                             |                                                                                   |                                                                                    | Pressure=1 atm |           |           |           |

Zero-point correction= 0.269299

Electronic Energy = -2545.70485773

Internal Energy (E)= -2545.41211573

Enthalpy (H)= -2545.41117173

Gibbs Free Energy (G)=-2545.49150373

Gibbs Free Energy of Solvation=-2545.54791094



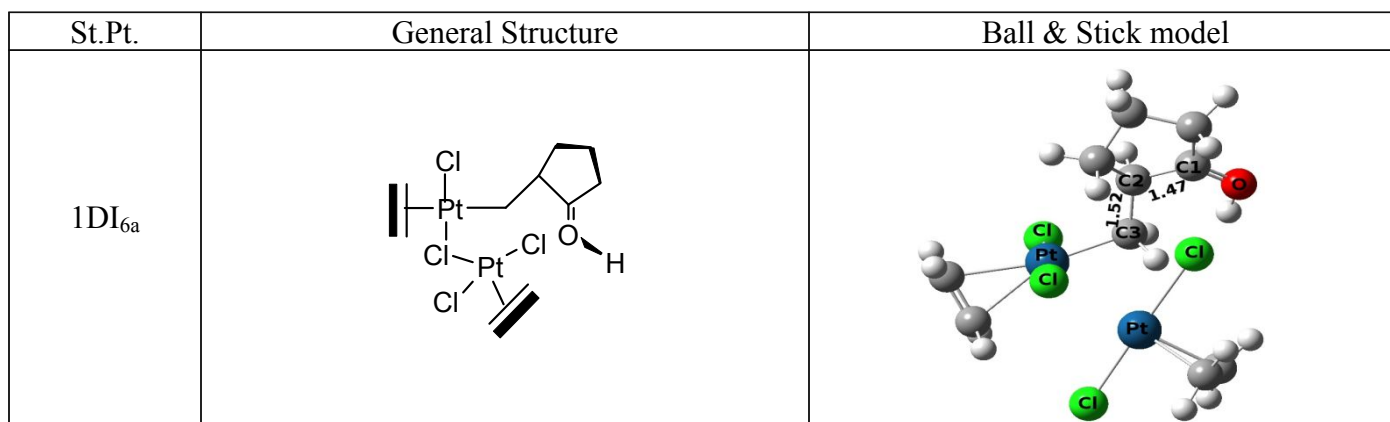

**Cartesian co-ordinate**

**Frequencies**

| Atoms | X        | Y        | Z        |
|-------|----------|----------|----------|
| C     | 1.88269  | -3.04628 | -0.37916 |
| C     | 2.67380  | -2.44035 | -1.30995 |
| Pt    | 1.74885  | -0.76333 | 0.04119  |
| Cl    | 3.61562  | -0.80603 | 1.44535  |
| Cl    | -0.12432 | -0.61771 | -1.55076 |
| H     | 2.29079  | -2.20734 | -2.29895 |
| H     | 3.73858  | -2.31769 | -1.14016 |
| H     | 2.30520  | -3.41596 | 0.54988  |
| H     | 0.84657  | -3.29627 | -0.59309 |
| Pt    | -2.06761 | -0.30303 | -0.07798 |
| Cl    | -2.22497 | -2.61940 | 0.15576  |
| Cl    | -1.90981 | 2.09906  | -0.25438 |
| H     | -4.59462 | -1.03475 | 0.24401  |
| C     | -4.09837 | -0.11103 | 0.52374  |
| C     | -3.27670 | -0.07259 | 1.65637  |
| H     | -4.47042 | 0.81136  | 0.08907  |
| H     | -3.01868 | 0.88223  | 2.10326  |
| H     | -3.13623 | -0.96504 | 2.25763  |
| C     | 1.57134  | 2.22849  | 0.18854  |
| O     | 0.34719  | 3.58213  | 1.78751  |
| C     | 0.83001  | 3.42624  | 0.62005  |
| C     | 1.18411  | 0.96421  | 0.95693  |
| C     | 0.68965  | 4.45168  | -0.43542 |
| H     | -0.37624 | 4.42049  | -0.70749 |
| C     | 1.56084  | 3.88470  | -1.57344 |
| H     | 1.19385  | 4.18714  | -2.55411 |
| H     | 2.58920  | 4.24567  | -1.46888 |
| C     | 1.49427  | 2.36324  | -1.35023 |
| H     | 0.54180  | 1.95904  | -1.69904 |
| H     | 2.30271  | 1.81139  | -1.83178 |
| H     | 0.91245  | 5.45922  | -0.07481 |
| H     | 2.61643  | 2.48867  | 0.46056  |
| H     | 0.45155  | 2.74884  | 2.29607  |
| H     | 0.09614  | 0.93087  | 1.07869  |
| H     | 1.66639  | 0.97055  | 1.94219  |

|           |           |           |
|-----------|-----------|-----------|
| 23.6962   | 26.9290   | 52.5752   |
| 57.1750   | 61.6105   | 67.4456   |
| 81.3128   | 84.7311   | 96.7828   |
| 124.8826  | 130.6202  | 132.1924  |
| 145.9952  | 148.3005  | 156.2125  |
| 165.4216  | 171.8090  | 178.2755  |
| 198.6326  | 205.9021  | 222.9058  |
| 232.9122  | 262.3470  | 274.6829  |
| 295.7665  | 326.7431  | 337.6843  |
| 343.1241  | 397.2779  | 399.0131  |
| 454.1488  | 500.5717  | 510.1677  |
| 537.6954  | 593.5783  | 606.3508  |
| 677.9148  | 720.5922  | 766.4827  |
| 781.5832  | 822.3429  | 832.3238  |
| 837.9191  | 864.4457  | 904.3849  |
| 932.4406  | 954.4268  | 1011.8122 |
| 1018.7919 | 1019.1813 | 1023.7887 |
| 1055.9630 | 1058.9128 | 1070.5425 |
| 1075.1628 | 1077.0517 | 1135.7153 |
| 1139.3255 | 1181.9221 | 1211.9596 |
| 1219.7674 | 1229.0295 | 1234.8214 |
| 1237.4356 | 1267.6235 | 1287.8835 |
| 1290.9225 | 1312.7131 | 1326.1855 |
| 1350.4842 | 1352.2708 | 1418.5974 |
| 1463.8098 | 1477.1044 | 1479.8765 |
| 1486.1250 | 1508.5621 | 1518.2673 |
| 1572.4219 | 1640.1865 | 1654.1938 |
| 2964.2360 | 3061.2305 | 3066.4162 |
| 3091.3408 | 3133.6098 | 3137.9839 |
| 3146.0536 | 3169.4751 | 3172.7425 |
| 3174.8427 | 3183.1559 | 3188.0381 |
| 3199.7969 | 3269.9875 | 3270.7373 |
| 3288.9534 | 3290.7949 | 3615.3994 |

**Statistical Thermodynamic Analysis**

Temperature=298.15 K

Pressure=1 atm

Zero-point correction= 0.270039

Electronic Energy = -2545.69152678

Internal Energy (E)= -2545.39773178

Enthalpy (H)= -2545.39678778

Gibbs Free Energy (G)=-2545.47850578

Gibbs Free Energy of Solvation=-2545.53963123

| St.Pt.                                           | General Structure                                                                 | Ball & Stick model                                                                 |                |            |           |           |
|--------------------------------------------------|-----------------------------------------------------------------------------------|------------------------------------------------------------------------------------|----------------|------------|-----------|-----------|
| 1DTS <sub>6a</sub>                               | 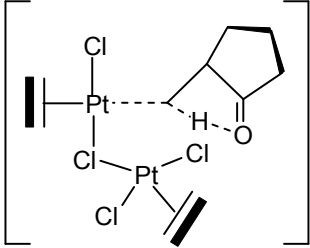 |  |                |            |           |           |
| <b><u>Cartesian co-ordinate</u></b>              |                                                                                   | <b><u>Frequencies</u></b>                                                          |                |            |           |           |
| -----<br>Atoms                                   | X                                                                                 | Y                                                                                  | Z              | -1259.8304 | 14.0806   | 26.9348   |
| -----                                            |                                                                                   |                                                                                    |                | 32.4722    | 53.5467   | 64.2757   |
|                                                  |                                                                                   |                                                                                    |                | 72.4401    | 81.6826   | 82.6795   |
| C                                                | 1.24356                                                                           | -3.08271                                                                           | -0.38693       | 100.1948   | 123.2117  | 128.9600  |
| C                                                | 2.18809                                                                           | -2.61138                                                                           | -1.28726       | 132.4672   | 152.7435  | 159.2747  |
| Pt                                               | 1.57807                                                                           | -0.95433                                                                           | 0.00764        | 166.6422   | 171.7530  | 182.2188  |
| Cl                                               | 3.31401                                                                           | -1.48545                                                                           | 1.47086        | 193.0845   | 198.1745  | 218.2020  |
| Cl                                               | -0.15826                                                                          | -0.43458                                                                           | -1.62255       | 242.7179   | 255.8062  | 263.9333  |
| H                                                | 1.89359                                                                           | -2.33140                                                                           | -2.29402       | 301.8965   | 323.1014  | 329.7258  |
| H                                                | 3.24654                                                                           | -2.75726                                                                           | -1.09817       | 335.7262   | 342.5690  | 406.6861  |
| H                                                | 1.56000                                                                           | -3.58760                                                                           | 0.52040        | 454.7441   | 471.7932  | 513.7405  |
| H                                                | 0.19259                                                                           | -3.15405                                                                           | -0.65627       | 557.5097   | 585.2525  | 644.9697  |
| Pt                                               | -2.06289                                                                          | -0.07086                                                                           | -0.08013       | 671.5963   | 718.0643  | 754.5340  |
| Cl                                               | -2.40684                                                                          | -2.38790                                                                           | 0.03831        | 776.7037   | 793.4018  | 830.0940  |
| Cl                                               | -1.70179                                                                          | 2.28342                                                                            | -0.15380       | 837.2950   | 842.7493  | 859.7002  |
| H                                                | -4.62408                                                                          | -0.60737                                                                           | 0.32529        | 925.0965   | 957.2747  | 961.7091  |
| C                                                | -4.03957                                                                          | 0.25700                                                                            | 0.62397        | 970.5841   | 1018.1751 | 1021.7107 |
| C                                                | -3.16997                                                                          | 0.16976                                                                            | 1.71841        | 1040.6463  | 1046.5545 | 1055.4977 |
| H                                                | -4.34831                                                                          | 1.22833                                                                            | 0.25075        | 1073.7630  | 1081.5861 | 1085.3703 |
| H                                                | -2.80942                                                                          | 1.07561                                                                            | 2.19559        | 1151.4444  | 1172.6194 | 1192.7415 |
| H                                                | -3.08122                                                                          | -0.76160                                                                           | 2.26842        | 1208.2482  | 1227.9117 | 1230.0160 |
| C                                                | 1.97897                                                                           | 2.08906                                                                            | 0.16334        | 1233.5800  | 1244.8297 | 1288.0847 |
| O                                                | 0.91289                                                                           | 3.33925                                                                            | 1.83529        | 1299.3449  | 1307.5286 | 1310.8124 |
| C                                                | 1.43854                                                                           | 3.38453                                                                            | 0.72587        | 1316.1247  | 1352.2799 | 1370.8660 |
| C                                                | 1.37056                                                                           | 0.99690                                                                            | 1.03084        | 1424.0805  | 1440.7271 | 1466.2316 |
| C                                                | 1.48048                                                                           | 4.49306                                                                            | -0.27382       | 1471.7204  | 1501.9609 | 1516.8527 |
| H                                                | 0.43553                                                                           | 4.78101                                                                            | -0.44336       | 1573.5369  | 1593.2905 | 1648.6235 |
| C                                                | 2.09337                                                                           | 3.80581                                                                            | -1.51363       | 1840.3775  | 3037.7079 | 3071.1015 |
| H                                                | 1.70342                                                                           | 4.21715                                                                            | -2.44514       | 3085.8142  | 3091.7587 | 3122.2434 |
| H                                                | 3.17959                                                                           | 3.94455                                                                            | -1.51528       | 3150.2274  | 3175.1642 | 3175.2055 |
| C                                                | 1.75004                                                                           | 2.30836                                                                            | -1.34253       | 3176.6903  | 3180.4931 | 3185.1707 |
| H                                                | 0.70149                                                                           | 2.12778                                                                            | -1.58918       | 3187.1721  | 3197.1252 | 3271.4929 |
| H                                                | 2.36850                                                                           | 1.65423                                                                            | -1.96040       | 3276.0304  | 3286.3220 | 3294.3422 |
| H                                                | 2.01191                                                                           | 5.37330                                                                            | 0.09570        |            |           |           |
| H                                                | 3.06662                                                                           | 2.10623                                                                            | 0.34023        |            |           |           |
| H                                                | 0.97626                                                                           | 1.99657                                                                            | 1.87051        |            |           |           |
| H                                                | 0.28117                                                                           | 0.87285                                                                            | 1.02385        |            |           |           |
| H                                                | 1.95289                                                                           | 0.62723                                                                            | 1.87610        |            |           |           |
| <b><u>Statistical Thermodynamic Analysis</u></b> |                                                                                   |                                                                                    |                |            |           |           |
| Temperature=298.15 K                             |                                                                                   |                                                                                    | Pressure=1 atm |            |           |           |

Zero-point correction= 0.264393

Internal Energy (E)= -2545.3710623

Gibbs Free Energy (G)=-2545.4516603

Electronic Energy = -2545.65876030

Enthalpy (H)= -2545.3701183

Gibbs Free Energy of Solvation=-2545.52078592

| St.Pt.                                           | General Structure                                                                                                                     | Ball & Stick model                                                                 |                |           |           |           |
|--------------------------------------------------|---------------------------------------------------------------------------------------------------------------------------------------|------------------------------------------------------------------------------------|----------------|-----------|-----------|-----------|
| 1DI <sub>7a</sub>                                | 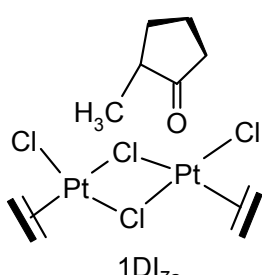 <p style="text-align: center;">1DI<sub>7a</sub></p> |  |                |           |           |           |
| <b><u>Cartesian co-ordinate</u></b>              |                                                                                                                                       | <b><u>Frequencies</u></b>                                                          |                |           |           |           |
| Atoms                                            | X                                                                                                                                     | Y                                                                                  | Z              | 5.3789    | 22.0991   | 29.4019   |
| C                                                | 3.48897                                                                                                                               | 0.04962                                                                            | -1.62713       | 40.0211   | 62.6325   | 63.1175   |
| C                                                | 2.85296                                                                                                                               | 1.27161                                                                            | -1.36647       | 79.6455   | 84.1542   | 91.2118   |
| Pt                                               | 2.00072                                                                                                                               | -0.23985                                                                           | -0.14110       | 93.1962   | 113.2529  | 123.4007  |
| Cl                                               | 3.56411                                                                                                                               | 0.21890                                                                            | 1.49673        | 126.7849  | 141.3928  | 144.5896  |
| Cl                                               | 0.28456                                                                                                                               | -0.74381                                                                           | -1.79611       | 158.1682  | 175.3622  | 184.2382  |
| H                                                | 2.07102                                                                                                                               | 1.63299                                                                            | -2.02802       | 187.6569  | 192.6064  | 211.3716  |
| H                                                | 3.31283                                                                                                                               | 1.99462                                                                            | -0.70009       | 227.4715  | 251.6117  | 257.8250  |
| H                                                | 4.44337                                                                                                                               | -0.17602                                                                           | -1.16209       | 275.7383  | 278.1754  | 351.3334  |
| H                                                | 3.20680                                                                                                                               | -0.54232                                                                           | -2.49261       | 352.6112  | 355.3612  | 401.4199  |
| Pt                                               | -1.42223                                                                                                                              | -1.04629                                                                           | -0.00338       | 403.9531  | 462.9400  | 500.3184  |
| Cl                                               | 0.48699                                                                                                                               | -1.37413                                                                           | 1.46863        | 508.1231  | 560.2997  | 569.0524  |
| Cl                                               | -3.17631                                                                                                                              | -0.77756                                                                           | -1.48551       | 612.1466  | 725.6522  | 768.8571  |
| H                                                | -2.13814                                                                                                                              | -2.62228                                                                           | 2.01062        | 769.4848  | 815.1928  | 831.5567  |
| C                                                | -2.73776                                                                                                                              | -1.95398                                                                           | 1.39946        | 847.5748  | 868.7868  | 915.9051  |
| C                                                | -2.71809                                                                                                                              | -0.57297                                                                           | 1.63181        | 951.1841  | 965.2164  | 997.1863  |
| H                                                | -3.54709                                                                                                                              | -2.39909                                                                           | 0.82914        | 1020.9014 | 1024.3812 | 1036.5775 |
| H                                                | -3.50102                                                                                                                              | 0.07096                                                                            | 1.24444        | 1069.3522 | 1073.0435 | 1082.0372 |
| H                                                | -2.09463                                                                                                                              | -0.14127                                                                           | 2.40955        | 1083.3738 | 1101.7586 | 1162.7532 |
| C                                                | -0.60631                                                                                                                              | 3.22280                                                                            | 0.69122        | 1182.5445 | 1191.7859 | 1211.9909 |
| O                                                | -2.55032                                                                                                                              | 2.33590                                                                            | 1.85160        | 1216.8002 | 1230.8784 | 1247.4795 |
| C                                                | -2.05428                                                                                                                              | 2.76452                                                                            | 0.83385        | 1286.0306 | 1287.1724 | 1306.4572 |
| C                                                | 0.33078                                                                                                                               | 2.51718                                                                            | 1.65604        | 1317.9682 | 1327.0624 | 1349.3366 |
| C                                                | -2.74683                                                                                                                              | 2.85286                                                                            | -0.51980       | 1380.0177 | 1416.0546 | 1460.3171 |
| H                                                | -3.02528                                                                                                                              | 1.83094                                                                            | -0.80725       | 1462.6500 | 1476.5732 | 1493.6436 |
| C                                                | -1.68527                                                                                                                              | 3.42570                                                                            | -1.46840       | 1503.7527 | 1504.4973 | 1519.4239 |
| H                                                | -1.78052                                                                                                                              | 3.04138                                                                            | -2.48562       | 1569.8378 | 1577.6681 | 1884.0749 |
| H                                                | -1.76181                                                                                                                              | 4.51752                                                                            | -1.51395       | 3028.1817 | 3063.2510 | 3072.8731 |
| C                                                | -0.35287                                                                                                                              | 3.02859                                                                            | -0.80735       | 3085.5206 | 3088.5767 | 3125.7710 |
| H                                                | -0.15210                                                                                                                              | 1.96531                                                                            | -1.00087       | 3145.0077 | 3147.8932 | 3154.0391 |
| H                                                | 0.50043                                                                                                                               | 3.60730                                                                            | -1.17339       | 3167.3492 | 3176.4633 | 3183.0419 |
| H                                                | -3.67014                                                                                                                              | 3.43300                                                                            | -0.44811       | 3185.0530 | 3186.3146 | 3275.5859 |
| H                                                | -0.61642                                                                                                                              | 4.30532                                                                            | 0.89768        | 3276.0186 | 3290.6588 | 3292.1610 |
| H                                                | 0.05601                                                                                                                               | 2.73350                                                                            | 2.69090        |           |           |           |
| H                                                | 0.26758                                                                                                                               | 1.43189                                                                            | 1.52393        |           |           |           |
| H                                                | 1.37217                                                                                                                               | 2.81377                                                                            | 1.49976        |           |           |           |
| <b><u>Statistical Thermodynamic Analysis</u></b> |                                                                                                                                       |                                                                                    |                |           |           |           |
| Temperature=298.15 K                             |                                                                                                                                       |                                                                                    | Pressure=1 atm |           |           |           |

|                                      |                                               |
|--------------------------------------|-----------------------------------------------|
| Zero-point correction= 0.269181      | Electronic Energy = -2545.73526445            |
| Internal Energy (E)= -2545.44165645  | Enthalpy (H)= -2545.44071245                  |
| Gibbs Free Energy (G)=-2545.52632145 | Gibbs Free Energy of Solvation=-2545.58301802 |

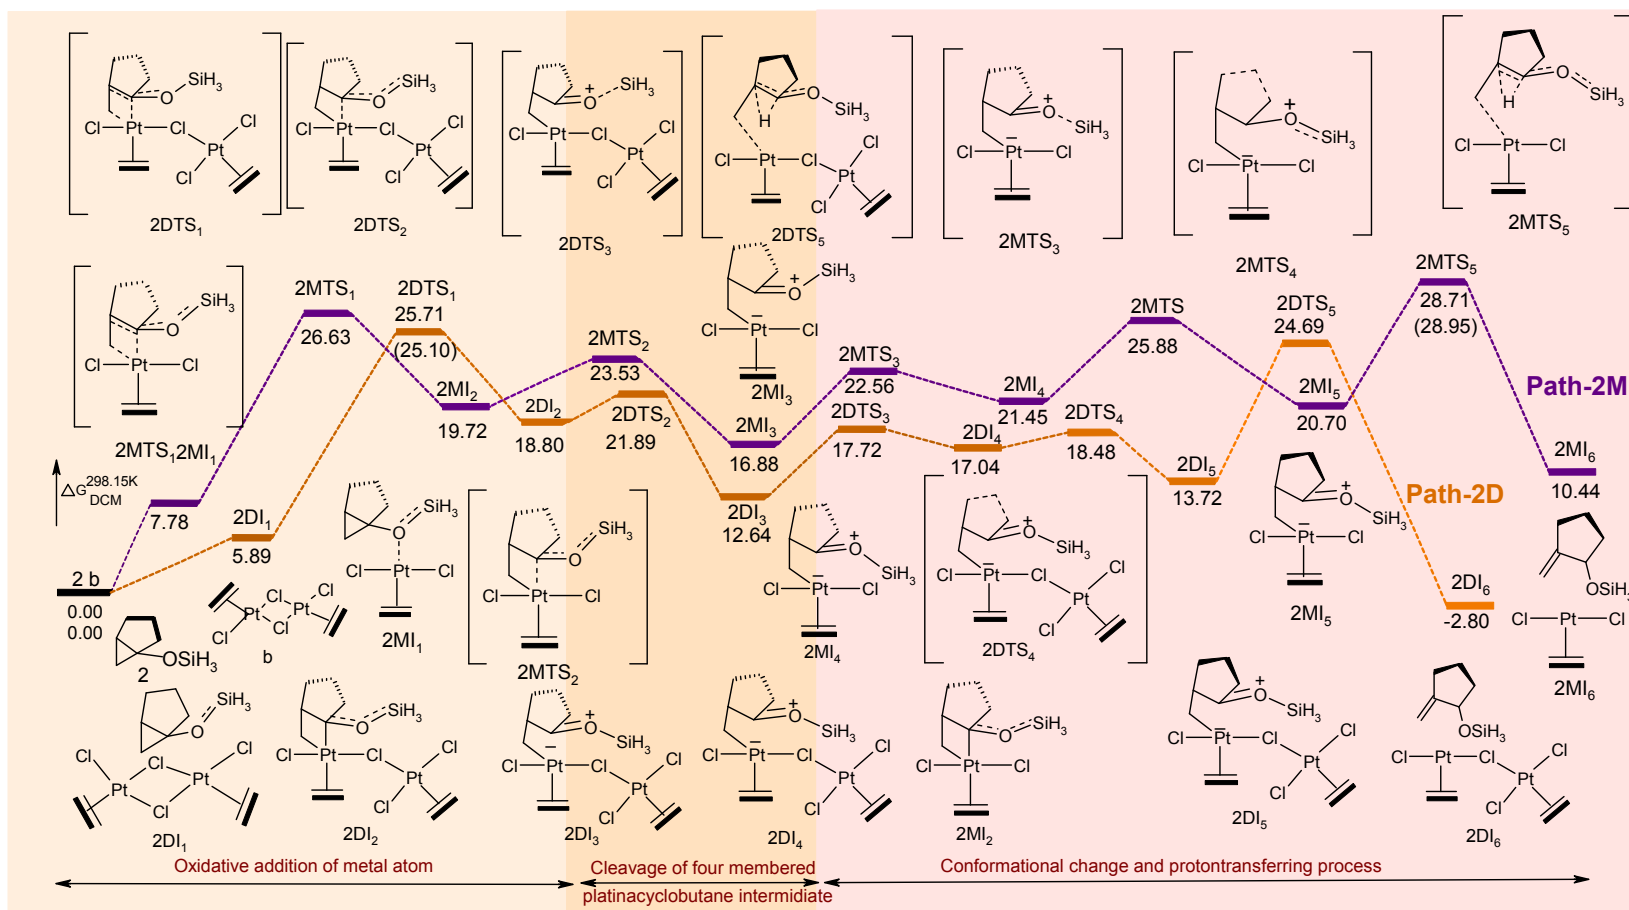

Figure S2. PES along with the thermodynamic parameters and structures of the stationary points of pathway-2M (violet colour) and pathway-2D (orange colour) under the catalytic condition of monomeric and dimeric form of Pt-salt. Energy values not enclosed in bracket are calculated using M06-2X functional. Values indicated in the round bracket are calculated using M06 functional.

| St.Pt.                                           | General Structure                                                                 | Ball & Stick model                                                                 |                                               |           |           |           |
|--------------------------------------------------|-----------------------------------------------------------------------------------|------------------------------------------------------------------------------------|-----------------------------------------------|-----------|-----------|-----------|
| 2                                                | 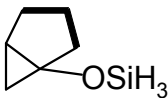 |  |                                               |           |           |           |
| <b><u>Cartesian co-ordinate</u></b>              |                                                                                   | <b><u>Frequencies</u></b>                                                          |                                               |           |           |           |
| -----<br>Atoms                                   | X                                                                                 | Y                                                                                  | Z                                             |           |           |           |
| -----                                            |                                                                                   |                                                                                    |                                               |           |           |           |
| C                                                | -0.82387                                                                          | 0.80406                                                                            | 0.78579                                       | 50.5800   | 108.4467  | 135.7920  |
| O                                                | 1.29653                                                                           | 0.53614                                                                            | -0.59065                                      | 235.1995  | 243.7345  | 357.1364  |
| C                                                | -0.08031                                                                          | 0.34785                                                                            | -0.44333                                      | 398.2266  | 458.8385  | 516.8303  |
| C                                                | -0.93806                                                                          | 1.56537                                                                            | -0.51870                                      | 613.6786  | 671.2735  | 721.3358  |
| H                                                | -1.86685                                                                          | 1.54693                                                                            | -1.08105                                      | 761.8710  | 820.9888  | 826.5272  |
| H                                                | -0.39233                                                                          | 2.50072                                                                            | -0.56261                                      | 870.7087  | 895.2086  | 919.7705  |
| C                                                | -0.67963                                                                          | -0.97251                                                                           | -0.89477                                      | 956.9564  | 979.9959  | 985.1784  |
| H                                                | -0.72335                                                                          | -1.07012                                                                           | -1.98352                                      | 991.1530  | 997.6362  | 1009.1378 |
| C                                                | -2.06462                                                                          | -1.00980                                                                           | -0.22626                                      | 1020.0213 | 1055.5780 | 1072.0578 |
| H                                                | -2.79922                                                                          | -0.51298                                                                           | -0.86677                                      | 1119.2736 | 1129.0063 | 1188.4395 |
| H                                                | -2.42288                                                                          | -2.02861                                                                           | -0.06342                                      | 1214.6074 | 1267.2868 | 1278.6625 |
| C                                                | -1.89683                                                                          | -0.22419                                                                           | 1.09259                                       | 1302.3936 | 1347.3555 | 1356.5718 |
| H                                                | -2.84006                                                                          | 0.21609                                                                            | 1.43070                                       | 1368.9609 | 1416.2538 | 1497.3544 |
| H                                                | -1.53818                                                                          | -0.88915                                                                           | 1.88701                                       | 1502.2798 | 1508.6772 | 1530.3504 |
| H                                                | -0.05079                                                                          | -1.78840                                                                           | -0.51358                                      | 2239.2261 | 2242.6140 | 2289.2514 |
| H                                                | -0.28956                                                                          | 1.28703                                                                            | 1.59732                                       | 3053.5143 | 3068.6937 | 3090.8192 |
| H                                                | 3.66826                                                                           | 0.37054                                                                            | 0.23624                                       | 3120.0301 | 3126.5413 | 3145.0497 |
| H                                                | 1.91830                                                                           | -0.43706                                                                           | 1.72063                                       | 3159.0805 | 3216.2177 | 3254.5058 |
| H                                                | 2.55476                                                                           | -1.72213                                                                           | -0.21136                                      |           |           |           |
| Si                                               | 2.37926                                                                           | -0.34476                                                                           | 0.31169                                       |           |           |           |
| <b><u>Statistical Thermodynamic Analysis</u></b> |                                                                                   |                                                                                    |                                               |           |           |           |
| Temperature=298.15 K                             |                                                                                   |                                                                                    | Pressure=1 atm                                |           |           |           |
| Zero-point correction= 0.167917                  |                                                                                   |                                                                                    | Electronic Energy = -600.400552085            |           |           |           |
| Internal Energy (E)= -600.224173085              |                                                                                   |                                                                                    | Enthalpy (H)= -600.223229085                  |           |           |           |
| Gibbs Free Energy (G)=-600.266249085             |                                                                                   |                                                                                    | Gibbs Free Energy of Solvation=-600.268488721 |           |           |           |



| St.Pt.                                           | General Structure | Ball & Stick model        |                                               |           |           |           |
|--------------------------------------------------|-------------------|---------------------------|-----------------------------------------------|-----------|-----------|-----------|
| b                                                |                   |                           |                                               |           |           |           |
| <b><u>Cartesian co-ordinate</u></b>              |                   | <b><u>Frequencies</u></b> |                                               |           |           |           |
| -----<br>Atoms                                   | X                 | Y                         | Z                                             |           |           |           |
| -----                                            |                   |                           |                                               |           |           |           |
| C                                                | -3.17738          | -1.54894                  | -0.67531                                      | 2.9387    | 50.0966   | 80.5572   |
| C                                                | -3.15374          | -1.54304                  | 0.72645                                       | 87.9864   | 89.3817   | 109.7068  |
| Pt                                               | -1.80036          | -0.07912                  | -0.00347                                      | 124.2386  | 128.6058  | 177.8734  |
| Cl                                               | -3.49559          | 1.48916                   | 0.02492                                       | 178.2620  | 192.6239  | 195.6003  |
| Cl                                               | 0.04341           | -1.67277                  | -0.03359                                      | 237.5322  | 257.6038  | 276.6461  |
| H                                                | -2.57032          | -2.27967                  | 1.27091                                       | 281.8348  | 354.5421  | 356.1301  |
| H                                                | -3.92403          | -1.01455                  | 1.27868                                       | 404.2840  | 405.5701  | 507.5857  |
| H                                                | -3.96599          | -1.02532                  | -1.20589                                      | 507.6732  | 773.6047  | 773.9266  |
| H                                                | -2.61278          | -2.29059                  | -1.23260                                      | 847.8907  | 847.9440  | 1024.5210 |
| Pt                                               | 1.80031           | 0.07911                   | -0.00347                                      | 1024.7903 | 1076.4852 | 1076.6357 |
| Cl                                               | 3.49562           | -1.48913                  | 0.02495                                       | 1080.1263 | 1080.2373 | 1229.9457 |
| Cl                                               | -0.04342          | 1.67289                   | -0.03354                                      | 1230.0007 | 1288.7163 | 1289.5402 |
| H                                                | 3.92408           | 1.01430                   | 1.27865                                       | 1479.3815 | 1479.4633 | 1580.3803 |
| C                                                | 3.15389           | 1.54294                   | 0.72641                                       | 1581.5728 | 3178.0579 | 3178.0976 |
| C                                                | 3.17757           | 1.54877                   | -0.67535                                      | 1581.5728 | 3178.0579 | 3178.0976 |
| H                                                | 2.57058           | 2.27970                   | 1.27081                                       | 3183.1235 | 3183.1740 | 3278.3804 |
| H                                                | 2.61303           | 2.29044                   | -1.23268                                      | 3278.3886 | 3293.8032 | 3293.8111 |
| H                                                | 3.96610           | 1.02499                   | -1.20588                                      |           |           |           |
| H                                                | 2.55476           | -1.72213                  | -0.21136                                      |           |           |           |
| Si                                               | 2.37926           | -0.34476                  | 0.31169                                       |           |           |           |
| <b><u>Statistical Thermodynamic Analysis</u></b> |                   |                           |                                               |           |           |           |
| Temperature=298.15 K                             |                   |                           | Pressure=1 atm                                |           |           |           |
| Zero-point correction= 0.117643                  |                   |                           | Electronic Energy = -2235.96844340            |           |           |           |
| Internal Energy (E)= -2235.8353104               |                   |                           | Enthalpy (H)= -2235.8343664                   |           |           |           |
| Gibbs Free Energy (G)=-2235.8994584              |                   |                           | Gibbs Free Energy of Solvation=-2235.96255236 |           |           |           |

| St.Pt.                                           | General Structure                                                                 | Ball & Stick model                                                                 |          |                                               |           |           |  |
|--------------------------------------------------|-----------------------------------------------------------------------------------|------------------------------------------------------------------------------------|----------|-----------------------------------------------|-----------|-----------|--|
| c                                                | 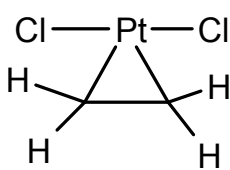 |  |          |                                               |           |           |  |
| <b><u>Cartesian co-ordinate</u></b>              |                                                                                   | <b><u>Frequencies</u></b>                                                          |          |                                               |           |           |  |
| -----<br>Atoms                                   | X                                                                                 | Y                                                                                  | Z        | -----                                         |           |           |  |
| Pt                                               | -0.00010                                                                          | -0.20997                                                                           | -0.00001 | 115.0144                                      | 119.7496  | 137.1477  |  |
| Cl                                               | 2.31760                                                                           | -0.35512                                                                           | 0.00004  | 141.5947                                      | 338.9983  | 353.7419  |  |
| Cl                                               | -2.31780                                                                          | -0.35459                                                                           | 0.00001  | 458.4094                                      | 524.4425  | 811.5035  |  |
| H                                                | 0.92902                                                                           | 1.90430                                                                            | 1.25018  | 831.1351                                      | 978.9657  | 1095.1484 |  |
| C                                                | 0.00057                                                                           | 1.73535                                                                            | 0.71254  | 1101.7933                                     | 1223.8808 | 1232.6997 |  |
| C                                                | 0.00077                                                                           | 1.73536                                                                            | -0.71253 | 1464.1366                                     | 1545.3096 | 3171.1591 |  |
| H                                                | -0.92785                                                                          | 1.90503                                                                            | 1.24999  | 3171.6501                                     | 3269.9209 | 3283.7780 |  |
| H                                                | -0.92750                                                                          | 1.90508                                                                            | -1.25024 |                                               |           |           |  |
| H                                                | 0.92937                                                                           | 1.90432                                                                            | -1.24990 |                                               |           |           |  |
| Pt                                               | 1.80031                                                                           | 0.07911                                                                            | -0.00347 |                                               |           |           |  |
| Cl                                               | 3.49562                                                                           | -1.48913                                                                           | 0.02495  |                                               |           |           |  |
| Cl                                               | -0.04342                                                                          | 1.67289                                                                            | -0.03354 |                                               |           |           |  |
| H                                                | 3.92408                                                                           | 1.01430                                                                            | 1.27865  |                                               |           |           |  |
| C                                                | 3.15389                                                                           | 1.54294                                                                            | 0.72641  |                                               |           |           |  |
| C                                                | 3.17757                                                                           | 1.54877                                                                            | -0.67535 |                                               |           |           |  |
| H                                                | 2.57058                                                                           | 2.27970                                                                            | 1.27081  |                                               |           |           |  |
| H                                                | 2.61303                                                                           | 2.29044                                                                            | -1.23268 |                                               |           |           |  |
| H                                                | 3.96610                                                                           | 1.02499                                                                            | -1.20588 |                                               |           |           |  |
| H                                                | 2.55476                                                                           | -1.72213                                                                           | -0.21136 |                                               |           |           |  |
| Si                                               | 2.37926                                                                           | -0.34476                                                                           | 0.31169  |                                               |           |           |  |
| <b><u>Statistical Thermodynamic Analysis</u></b> |                                                                                   |                                                                                    |          |                                               |           |           |  |
| Temperature=298.15 K                             |                                                                                   |                                                                                    |          | Pressure=1 atm                                |           |           |  |
| Zero-point correction= 0.057798                  |                                                                                   |                                                                                    |          | Electronic Energy = -1117.94345067            |           |           |  |
| Internal Energy (E)= -1117.87862367              |                                                                                   |                                                                                    |          | Enthalpy (H)= -1117.87767967                  |           |           |  |
| Gibbs Free Energy (G)=-1117.91936467             |                                                                                   |                                                                                    |          | Gibbs Free Energy of Solvation=-1117.97494035 |           |           |  |

| St.Pt.                                           | General Structure | Ball & Stick model        |                                    |           |           |           |
|--------------------------------------------------|-------------------|---------------------------|------------------------------------|-----------|-----------|-----------|
| 2MI <sub>1</sub>                                 |                   |                           |                                    |           |           |           |
| <b><u>Cartesian co-ordinate</u></b>              |                   | <b><u>Frequencies</u></b> |                                    |           |           |           |
| -----<br>Atoms<br>-----                          | X                 | Y                         | Z                                  |           |           |           |
| Pt                                               | 1.06321           | 0.03935                   | -0.01058                           | 27.1306   | 50.5511   | 62.2921   |
| Cl                                               | 1.15196           | 2.29960                   | 0.61631                            | 86.9796   | 93.5489   | 114.8591  |
| Cl                                               | 0.91080           | -2.24341                  | -0.59546                           | 128.1213  | 139.1293  | 150.7967  |
| H                                                | 2.55864           | 1.38471                   | -1.72196                           | 166.2276  | 174.8112  | 190.4614  |
| C                                                | 2.60843           | 0.34335                   | -1.42023                           | 204.2583  | 255.2275  | 272.3733  |
| C                                                | 3.16957           | 0.00022                   | -0.18319                           | 317.6669  | 330.9051  | 369.4035  |
| H                                                | 2.48769           | -0.41145                  | -2.19072                           | 411.5408  | 437.6016  | 453.3701  |
| H                                                | 3.48027           | -1.02243                  | 0.00650                            | 518.0030  | 537.0375  | 616.1421  |
| H                                                | 3.55632           | 0.77428                   | 0.47180                            | 660.1493  | 712.9688  | 766.0175  |
| C                                                | -3.31729          | 0.75032                   | 0.49401                            | 786.8476  | 804.1516  | 826.5418  |
| O                                                | -0.95038          | -0.15091                  | 0.84732                            | 839.0961  | 865.8636  | 891.4545  |
| C                                                | -1.97241          | 0.31773                   | -0.02445                           | 919.8605  | 943.1841  | 965.2260  |
| C                                                | -2.29697          | 1.76724                   | 0.02654                            | 975.5311  | 983.9132  | 999.0939  |
| H                                                | -2.44546          | 2.30754                   | -0.90339                           | 1013.5995 | 1017.1930 | 1025.7494 |
| H                                                | -1.78564          | 2.32185                   | 0.80456                            | 1054.5919 | 1079.3823 | 1080.4243 |
| C                                                | -2.15441          | -0.42819                  | -1.33005                           | 1086.1478 | 1103.1703 | 1129.4579 |
| H                                                | -1.36768          | -0.19809                  | -2.05670                           | 1190.1871 | 1210.1370 | 1233.3574 |
| C                                                | -3.55762          | 0.00003                   | -1.79832                           | 1254.2342 | 1268.3725 | 1288.5254 |
| H                                                | -3.48841          | 0.91554                   | -2.39267                           | 1298.6376 | 1347.3308 | 1355.6351 |
| H                                                | -4.03052          | -0.75490                  | -2.42929                           | 1369.5203 | 1416.5865 | 1469.8885 |
| C                                                | -4.35710          | 0.27161                   | -0.50524                           | 1494.2130 | 1506.3395 | 1508.5473 |
| H                                                | -5.16347          | 0.99368                   | -0.66289                           | 1531.3151 | 1574.4213 | 2271.6238 |
| H                                                | -4.80803          | -0.65548                  | -0.13369                           | 2282.9697 | 2332.7806 | 3077.9865 |
| H                                                | -2.10938          | -1.50534                  | -1.13306                           | 3079.9622 | 3098.7859 | 3125.5122 |
| H                                                | -3.53799          | 0.73123                   | 1.55613                            | 3130.8431 | 3153.5314 | 3169.0885 |
| H                                                | -1.94081          | -2.55833                  | 1.12930                            | 3180.0658 | 3190.7442 | 3213.2251 |
| H                                                | -0.01744          | -1.83636                  | 2.48675                            | 3273.5939 | 3278.6468 | 3297.0893 |
| H                                                | -2.24266          | -0.95784                  | 2.91170                            |           |           |           |
| Si                                               | -1.30521          | -1.46284                  | 1.88536                            |           |           |           |
| <b><u>Statistical Thermodynamic Analysis</u></b> |                   |                           |                                    |           |           |           |
| Temperature=298.15 K                             |                   |                           | Pressure=1 atm                     |           |           |           |
| Zero-point correction= 0.228071                  |                   |                           | Electronic Energy = -1718.39068277 |           |           |           |
| Internal Energy (E)= -1718.14583877              |                   |                           | Enthalpy (H)= -1718.14489477       |           |           |           |

Gibbs Free Energy (G)=-1718.20911177    Gibbs Free Energy of Solvation=-1718.24369707

| St.Pt.                                           | General Structure | Ball & Stick model        |                                              |           |           |           |
|--------------------------------------------------|-------------------|---------------------------|----------------------------------------------|-----------|-----------|-----------|
| 2MTS <sub>1</sub>                                |                   |                           |                                              |           |           |           |
| <b><u>Cartesian co-ordinate</u></b>              |                   | <b><u>Frequencies</u></b> |                                              |           |           |           |
| -----<br>Atoms                                   | X                 | Y                         | Z                                            | -----     |           |           |
| -----                                            |                   |                           |                                              | -----     |           |           |
| C                                                | 3.03549           | 0.48739                   | 0.10069                                      | -197.8503 | 37.0003   | 70.3168   |
| C                                                | 2.42759           | 0.53655                   | 1.34331                                      | 105.2710  | 113.5130  | 124.4636  |
| Pt                                               | 0.90321           | 0.02770                   | -0.15643                                     | 130.9453  | 141.6791  | 156.1813  |
| Cl                                               | 1.41713           | -2.26251                  | 0.15282                                      | 166.0930  | 176.8732  | 195.8448  |
| Cl                                               | 0.50402           | 2.34538                   | -0.52185                                     | 225.5524  | 231.5137  | 258.0296  |
| H                                                | 2.10631           | 1.48578                   | 1.75977                                      | 298.2498  | 308.3981  | 316.6671  |
| H                                                | 2.47045           | -0.32059                  | 2.00733                                      | 328.3845  | 387.5667  | 421.7400  |
| H                                                | 3.55975           | -0.40814                  | -0.21636                                     | 459.5212  | 468.6236  | 536.9912  |
| H                                                | 3.19962           | 1.39892                   | -0.46482                                     | 634.5494  | 698.8403  | 704.1945  |
| C                                                | -2.40810          | -0.60669                  | -0.86454                                     | 715.1974  | 743.3147  | 767.6438  |
| O                                                | -1.83620          | 0.91260                   | 1.00040                                      | 805.7074  | 838.2430  | 842.0402  |
| C                                                | -1.83811          | -0.26640                  | 0.42546                                      | 896.0124  | 909.4000  | 938.6672  |
| C                                                | -0.91057          | -0.46597                  | -1.29918                                     | 944.6571  | 975.4176  | 978.2155  |
| H                                                | -0.56639          | -1.41404                  | -1.71078                                     | 991.9130  | 1035.7050 | 1041.1901 |
| H                                                | -0.84259          | 0.38126                   | -1.97896                                     | 1046.5764 | 1048.6418 | 1053.9572 |
| C                                                | -1.69603          | -1.49825                  | 1.28560                                      | 1094.6178 | 1133.0784 | 1169.8546 |
| H                                                | -0.73287          | -1.57889                  | 1.78972                                      | 1197.5859 | 1233.6302 | 1237.9301 |
| C                                                | -2.01182          | -2.66403                  | 0.33859                                      | 1254.5182 | 1282.4154 | 1316.4661 |
| H                                                | -1.07813          | -3.04399                  | -0.07985                                     | 1322.0903 | 1338.2434 | 1365.9787 |
| H                                                | -2.50869          | -3.48732                  | 0.85418                                      | 1378.4256 | 1417.7631 | 1463.0563 |
| C                                                | -2.89518          | -2.04658                  | -0.76430                                     | 1466.6235 | 1503.8997 | 1528.3757 |
| H                                                | -2.81131          | -2.57237                  | -1.71877                                     | 1560.6894 | 1598.0056 | 2240.0135 |
| H                                                | -3.94984          | -2.04528                  | -0.46804                                     | 2298.0502 | 2330.8042 | 3068.5902 |
| H                                                | -2.47859          | -1.37116                  | 2.04656                                      | 3090.7468 | 3122.7015 | 3132.9797 |
| H                                                | -3.06146          | 0.11366                   | -1.35388                                     | 3145.8062 | 3166.6315 | 3177.2297 |
| H                                                | -1.90645          | 3.46070                   | 1.13282                                      | 3178.6121 | 3186.6600 | 3187.4441 |
| H                                                | -2.45115          | 2.43966                   | -1.05616                                     | 3233.6944 | 3275.5572 | 3293.0795 |
| H                                                | -3.97305          | 2.24338                   | 0.79249                                      |           |           |           |
| Si                                               | -2.54395          | 2.35656                   | 0.41017                                      |           |           |           |
| <b><u>Statistical Thermodynamic Analysis</u></b> |                   |                           |                                              |           |           |           |
| Temperature=298.15 K                             |                   |                           | Pressure=1 atm                               |           |           |           |
| Zero-point correction= 0.226134                  |                   |                           | Electronic Energy = -1718.36402544           |           |           |           |
| Internal Energy (E)= -1718.12153044              |                   |                           | Enthalpy (H)= -1718.12058644                 |           |           |           |
| Gibbs Free Energy (G)=-1718.18249344             |                   |                           | Gibbs Free Energy of Solvation=-1718.2136653 |           |           |           |



| St.Pt.                                           | General Structure | Ball & Stick model        |                                              |           |           |           |
|--------------------------------------------------|-------------------|---------------------------|----------------------------------------------|-----------|-----------|-----------|
| 2MI <sub>2</sub>                                 |                   |                           |                                              |           |           |           |
| <b><u>Cartesian co-ordinate</u></b>              |                   | <b><u>Frequencies</u></b> |                                              |           |           |           |
| -----<br>Atoms                                   | X                 | Y                         | Z                                            |           |           |           |
| -----                                            |                   |                           |                                              |           |           |           |
| C                                                | -2.90894          | -0.60489                  | -0.80754                                     | 31.1032   | 55.4465   | 79.1620   |
| C                                                | -2.30881          | 0.31183                   | -1.58577                                     | 101.9688  | 108.8744  | 127.6573  |
| Pt                                               | -0.52407          | -0.47223                  | 0.24405                                      | 138.4704  | 146.0286  | 149.6722  |
| Cl                                               | 0.00396           | -2.27577                  | -1.19564                                     | 161.3553  | 169.9935  | 176.5583  |
| Cl                                               | -1.38458          | 1.08954                   | 1.79002                                      | 223.2145  | 224.9806  | 237.5770  |
| H                                                | -2.40831          | 1.37049                   | -1.36546                                     | 278.4614  | 285.4718  | 308.1337  |
| H                                                | -1.76082          | 0.02139                   | -2.47782                                     | 325.2787  | 353.2832  | 399.1671  |
| H                                                | -2.86008          | -1.66250                  | -1.05126                                     | 424.3460  | 496.9685  | 556.6153  |
| H                                                | -3.48754          | -0.30475                  | 0.06156                                      | 606.2626  | 661.2455  | 710.9695  |
| C                                                | 1.95135           | 0.19547                   | 1.19724                                      | 747.2248  | 800.5094  | 835.0174  |
| O                                                | 0.93960           | 2.04814                   | -0.00024                                     | 846.6937  | 848.2885  | 865.6118  |
| C                                                | 1.27083           | 0.75172                   | -0.04955                                     | 883.1155  | 922.3848  | 959.6896  |
| C                                                | 0.96528           | -0.92766                  | 1.53475                                      | 970.5160  | 981.1573  | 987.1010  |
| H                                                | 1.32618           | -1.92810                  | 1.29089                                      | 1015.8584 | 1019.6757 | 1043.7473 |
| H                                                | 0.54739           | -0.86722                  | 2.53875                                      | 1045.6419 | 1074.1605 | 1079.0523 |
| C                                                | 2.04312           | 0.27383                   | -1.28540                                     | 1112.2233 | 1156.4622 | 1183.9608 |
| H                                                | 1.41667           | -0.10468                  | -2.09276                                     | 1203.6329 | 1216.2632 | 1247.0520 |
| C                                                | 3.04437           | -0.75391                  | -0.73896                                     | 1249.1584 | 1281.3509 | 1304.4811 |
| H                                                | 2.58747           | -1.74625                  | -0.74360                                     | 1326.1340 | 1340.5314 | 1360.3634 |
| H                                                | 3.94996           | -0.79782                  | -1.34763                                     | 1377.4384 | 1406.9785 | 1467.8351 |
| C                                                | 3.31894           | -0.28384                  | 0.69987                                      | 1468.8594 | 1474.3321 | 1496.8139 |
| H                                                | 3.73263           | -1.07103                  | 1.33593                                      | 1522.3513 | 1680.4345 | 2262.8504 |
| H                                                | 4.02406           | 0.55498                   | 0.69754                                      | 2292.7526 | 2311.6992 | 3061.8119 |
| H                                                | 2.57558           | 1.16562                   | -1.64388                                     | 3074.4260 | 3114.8174 | 3123.2148 |
| H                                                | 1.98212           | 0.95514                   | 1.98049                                      | 3135.6488 | 3145.3871 | 3169.0105 |
| H                                                | -1.22914          | 3.30981                   | -0.57969                                     | 3173.8822 | 3174.4045 | 3186.3831 |
| H                                                | 0.89751           | 4.18543                   | -1.35270                                     | 3211.9481 | 3270.3647 | 3290.4163 |
| H                                                | -0.03817          | 2.19314                   | -2.38256                                     |           |           |           |
| Si                                               | 0.09420           | 2.96902                   | -1.12814                                     |           |           |           |
| <b><u>Statistical Thermodynamic Analysis</u></b> |                   |                           |                                              |           |           |           |
| Temperature=298.15 K                             |                   |                           | Pressure=1 atm                               |           |           |           |
| Zero-point correction= 0.226312                  |                   |                           | Electronic Energy = -1718.37303675           |           |           |           |
| Internal Energy (E)= -1718.12939175              |                   |                           | Enthalpy (H)= -1718.12844775                 |           |           |           |
| Gibbs Free Energy (G)=-1718.19292675             |                   |                           | Gibbs Free Energy of Solvation=-1718.2246734 |           |           |           |





| St.Pt.                              | General Structure                                                                 | Ball & Stick model                                                                 |          |           |           |           |
|-------------------------------------|-----------------------------------------------------------------------------------|------------------------------------------------------------------------------------|----------|-----------|-----------|-----------|
| 2MTS <sub>2</sub>                   | 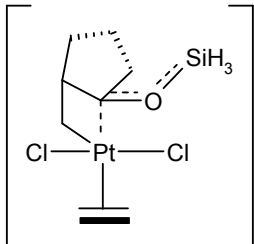 |  |          |           |           |           |
| <b><u>Cartesian co-ordinate</u></b> |                                                                                   | <b><u>Frequencies</u></b>                                                          |          |           |           |           |
| -----<br>Atoms                      | X                                                                                 | Y                                                                                  | Z        | -----     | -----     | -----     |
| -----                               | -----                                                                             | -----                                                                              | -----    | -----     | -----     | -----     |
| C                                   | -1.43126                                                                          | -2.38048                                                                           | 1.14059  | -82.6136  | 33.9188   | 77.0550   |
| C                                   | -0.71544                                                                          | -1.62754                                                                           | 2.00147  | 94.0740   | 104.5569  | 115.9650  |
| Pt                                  | -0.59122                                                                          | -0.47226                                                                           | -0.24382 | 124.9101  | 134.4338  | 142.3566  |
| Cl                                  | -2.57103                                                                          | 0.68148                                                                            | 0.34283  | 157.7860  | 164.1815  | 165.8643  |
| Cl                                  | 1.13221                                                                           | -1.94840                                                                           | -0.95665 | 175.1962  | 208.3655  | 214.4141  |
| H                                   | 0.32960                                                                           | -1.84949                                                                           | 2.19718  | 278.6981  | 291.3944  | 301.4750  |
| H                                   | -1.19047                                                                          | -0.84080                                                                           | 2.58072  | 308.0553  | 348.8108  | 432.4903  |
| H                                   | -2.49551                                                                          | -2.21083                                                                           | 1.00652  | 452.0346  | 461.6754  | 541.9901  |
| H                                   | -0.97331                                                                          | -3.21069                                                                           | 0.61191  | 631.3634  | 644.4807  | 696.6994  |
| C                                   | 0.51213                                                                           | 1.98217                                                                            | -1.12881 | 712.7612  | 775.9764  | 800.0252  |
| O                                   | 2.34531                                                                           | 0.66620                                                                            | -0.32177 | 822.2567  | 834.5051  | 843.9545  |
| C                                   | 1.23099                                                                           | 1.25581                                                                            | -0.03168 | 860.4099  | 920.4449  | 927.6051  |
| C                                   | -0.29232                                                                          | 0.83001                                                                            | -1.76144 | 958.3073  | 965.3376  | 985.3594  |
| H                                   | -1.26131                                                                          | 1.16086                                                                            | -2.13860 | 1012.4371 | 1028.1135 | 1030.7963 |
| H                                   | 0.29542                                                                           | 0.31942                                                                            | -2.52531 | 1047.5968 | 1071.5201 | 1092.7283 |
| C                                   | 0.94526                                                                           | 1.81518                                                                            | 1.33626  | 1126.4650 | 1155.6292 | 1197.2683 |
| H                                   | 0.74928                                                                           | 1.04607                                                                            | 2.08845  | 1229.4230 | 1243.0801 | 1246.2725 |
| C                                   | -0.19636                                                                          | 2.82247                                                                            | 1.12948  | 1254.9507 | 1292.9265 | 1313.3402 |
| H                                   | -1.13342                                                                          | 2.40284                                                                            | 1.49001  | 1322.4787 | 1353.6019 | 1367.4496 |
| H                                   | 0.00014                                                                           | 3.74314                                                                            | 1.68222  | 1368.4922 | 1453.5196 | 1456.6932 |
| C                                   | -0.28494                                                                          | 3.08555                                                                            | -0.39945 | 1466.3250 | 1502.4273 | 1526.8093 |
| H                                   | -1.32727                                                                          | 3.09175                                                                            | -0.72390 | 1553.1302 | 1666.1376 | 2248.2240 |
| H                                   | 0.14914                                                                           | 4.05857                                                                            | -0.64355 | 2313.5996 | 2338.9491 | 3035.6727 |
| H                                   | 1.88282                                                                           | 2.31752                                                                            | 1.62263  | 3092.6526 | 3104.5875 | 3113.9996 |
| H                                   | 1.24102                                                                           | 2.39298                                                                            | -1.83658 | 3122.1914 | 3136.1937 | 3168.3528 |
| H                                   | 2.44036                                                                           | -1.00480                                                                           | 1.68841  | 3174.7492 | 3184.9468 | 3197.7764 |
| H                                   | 4.09198                                                                           | -1.20111                                                                           | -0.15530 | 3199.9976 | 3269.7221 | 3290.2227 |
| H                                   | 4.17452                                                                           | 0.64506                                                                            | 1.41679  |           |           |           |
| Si                                  | 3.30221                                                                           | -0.32250                                                                           | 0.71051  |           |           |           |

**Statistical Thermodynamic Analysis**

Temperature=298.15 K

Pressure=1 atm

Zero-point correction= 0.225722

Internal Energy (E)= -1718.12575994

Gibbs Free Energy (G)=-1718.18803094

Electronic Energy = -1718.36831894

Enthalpy (H)= -1718.12481494

Gibbs Free Energy of Solvation=-1718.21860162

| St.Pt.                                           | General Structure | Ball & Stick model        |                                    |           |           |           |
|--------------------------------------------------|-------------------|---------------------------|------------------------------------|-----------|-----------|-----------|
| 2MI <sub>3</sub>                                 |                   |                           |                                    |           |           |           |
| <b><u>Cartesian co-ordinate</u></b>              |                   | <b><u>Frequencies</u></b> |                                    |           |           |           |
| -----<br>Atoms                                   | X                 | Y                         | Z                                  |           |           |           |
| -----                                            |                   |                           |                                    |           |           |           |
| C                                                | -2.99555          | 1.06174                   | -0.52980                           | 35.5293   | 44.8336   | 72.2914   |
| C                                                | -2.41833          | 1.57016                   | 0.59188                            | 89.2141   | 99.9989   | 110.5947  |
| Pt                                               | -1.00656          | -0.14305                  | -0.21105                           | 127.2750  | 139.2697  | 141.6932  |
| Cl                                               | 0.30286           | 1.48500                   | -1.46063                           | 157.9739  | 175.9172  | 182.7554  |
| Cl                                               | -2.12724          | -1.73053                  | 1.11743                            | 207.7324  | 224.9582  | 234.0387  |
| H                                                | -2.68269          | 1.19313                   | 1.57447                            | 261.9622  | 270.7509  | 292.4501  |
| H                                                | -1.78968          | 2.45329                   | 0.53656                            | 312.8710  | 387.2471  | 396.2858  |
| H                                                | -2.83456          | 1.52359                   | -1.49893                           | 507.5150  | 534.6674  | 565.5554  |
| H                                                | -3.73239          | 0.26773                   | -0.46310                           | 614.1517  | 683.4123  | 693.2159  |
| C                                                | 1.60128           | -1.50181                  | 0.58496                            | 712.0327  | 727.9705  | 790.7121  |
| O                                                | 1.73656           | 0.79817                   | 1.24255                            | 821.1983  | 831.7841  | 848.5712  |
| C                                                | 2.16457           | -0.14995                  | 0.52751                            | 890.7433  | 907.3117  | 930.1783  |
| C                                                | 0.46128           | -1.50312                  | -0.50096                           | 933.6186  | 960.0146  | 984.4370  |
| H                                                | 0.90095           | -1.35363                  | -1.49220                           | 995.2647  | 1008.6010 | 1028.4263 |
| H                                                | 0.03841           | -2.51045                  | -0.44119                           | 1047.7558 | 1062.0211 | 1062.9489 |
| C                                                | 3.30850           | -0.05575                  | -0.42996                           | 1081.8397 | 1155.4983 | 1202.4350 |
| H                                                | 3.05275           | 0.65057                   | -1.22798                           | 1219.5491 | 1238.7130 | 1242.5690 |
| C                                                | 3.53282           | -1.50899                  | -0.89285                           | 1272.7281 | 1273.0954 | 1316.6769 |
| H                                                | 3.09836           | -1.64962                  | -1.88396                           | 1319.0963 | 1352.1690 | 1357.8117 |
| H                                                | 4.59355           | -1.75402                  | -0.95915                           | 1374.7172 | 1429.7260 | 1466.5285 |
| C                                                | 2.79203           | -2.37591                  | 0.15011                            | 1467.3442 | 1506.1304 | 1524.3167 |
| H                                                | 2.45431           | -3.32877                  | -0.26159                           | 1642.5265 | 1686.5173 | 2292.5842 |
| H                                                | 3.44353           | -2.58773                  | 1.00510                            | 2314.3375 | 2384.4100 | 3064.7903 |
| H                                                | 4.16681           | 0.35576                   | 0.11823                            | 3086.4384 | 3089.1236 | 3125.0632 |
| H                                                | 1.14701           | -1.72602                  | 1.55276                            | 3129.2766 | 3144.4328 | 3160.3320 |
| H                                                | 2.73554           | 2.84558                   | -0.09024                           | 3162.2284 | 3178.0293 | 3182.2608 |
| H                                                | 0.58805           | 3.09995                   | 1.15726                            | 3189.4717 | 3271.5210 | 3292.1193 |
| H                                                | 2.69641           | 2.81943                   | 2.33191                            |           |           |           |
| Si                                               | 1.93413           | 2.53071                   | 1.09947                            |           |           |           |
| <b><u>Statistical Thermodynamic Analysis</u></b> |                   |                           |                                    |           |           |           |
| Temperature=298.15 K                             |                   |                           | Pressure=1 atm                     |           |           |           |
| Zero-point correction= 0.226232                  |                   |                           | Electronic Energy = -1718.36985935 |           |           |           |

Internal Energy (E)= -1718.12611535

Enthalpy (H)= -1718.12517035

Gibbs Free Energy (G)=-1718.19058735

Gibbs Free Energy of Solvation=-1718.22919461

| St.Pt.                              | General Structure | Ball & Stick model        |          |           |           |           |
|-------------------------------------|-------------------|---------------------------|----------|-----------|-----------|-----------|
| 2MTS <sub>3</sub>                   |                   |                           |          |           |           |           |
| <b><u>Cartesian co-ordinate</u></b> |                   | <b><u>Frequencies</u></b> |          |           |           |           |
| -----<br>Atoms                      | X                 | Y                         | Z        | -----     | -----     | -----     |
| -----                               | -----             | -----                     | -----    | -----     | -----     | -----     |
| C                                   | -3.08768          | 0.55654                   | -0.77366 | -115.8127 | 31.5136   | 43.4562   |
| C                                   | -2.68100          | 1.34177                   | 0.25659  | 86.8123   | 95.3436   | 102.3878  |
| Pt                                  | -0.93945          | -0.24328                  | -0.21742 | 103.3619  | 130.7021  | 134.7698  |
| Cl                                  | 0.21499           | 1.39213                   | -1.58216 | 138.7166  | 171.1753  | 176.4259  |
| Cl                                  | -1.89769          | -1.80003                  | 1.26936  | 192.7275  | 222.2829  | 248.5832  |
| H                                   | -2.92754          | 1.09016                   | 1.28346  | 263.1763  | 274.6180  | 281.7790  |
| H                                   | -2.21565          | 2.30255                   | 0.06086  | 313.7823  | 375.6559  | 409.2408  |
| H                                   | -2.94958          | 0.87390                   | -1.80269 | 421.0731  | 516.2476  | 560.5384  |
| H                                   | -3.67051          | -0.34103                  | -0.59351 | 611.9809  | 662.3245  | 689.6675  |
| C                                   | 1.82987           | -1.16481                  | 0.66490  | 715.0485  | 729.2062  | 802.3766  |
| O                                   | 1.97805           | 1.22749                   | 1.02868  | 822.8346  | 832.8645  | 850.0718  |
| C                                   | 2.33826           | 0.19250                   | 0.41559  | 899.6594  | 911.1228  | 935.3406  |
| C                                   | 0.67688           | -1.43353                  | -0.36274 | 952.1320  | 965.5202  | 980.4074  |
| H                                   | 1.07167           | -1.35849                  | -1.38083 | 989.0554  | 1015.8724 | 1024.1241 |
| H                                   | 0.37618           | -2.46704                  | -0.16703 | 1041.0622 | 1059.3098 | 1065.6815 |
| C                                   | 3.46904           | 0.20500                   | -0.55862 | 1087.0025 | 1158.2684 | 1198.8691 |
| H                                   | 3.18004           | 0.81292                   | -1.42325 | 1220.6817 | 1239.3046 | 1241.4500 |
| C                                   | 3.74048           | -1.28321                  | -0.84293 | 1262.4552 | 1274.4697 | 1314.7465 |
| H                                   | 3.27886           | -1.57297                  | -1.78858 | 1324.4842 | 1355.5637 | 1355.7757 |
| H                                   | 4.80730           | -1.49808                  | -0.91532 | 1368.2711 | 1431.2134 | 1465.3254 |
| C                                   | 3.06939           | -2.02410                  | 0.33507  | 1466.1953 | 1505.9056 | 1522.5053 |
| H                                   | 2.78372           | -3.04721                  | 0.08373  | 1645.7952 | 1714.2007 | 2286.8030 |
| H                                   | 3.74648           | -2.06222                  | 1.19574  | 2333.3742 | 2389.8674 | 3083.2302 |
| H                                   | 4.31047           | 0.71156                   | -0.06945 | 3084.1204 | 3084.7435 | 3119.8903 |
| H                                   | 1.42097           | -1.27093                  | 1.67271  | 3136.0330 | 3140.2008 | 3157.0072 |
| H                                   | 1.29563           | 3.62263                   | 0.29970  | 3161.5478 | 3173.2484 | 3173.6865 |
| H                                   | -0.38499          | 2.21559                   | 1.47354  | 3188.5481 | 3269.9280 | 3292.4651 |
| H                                   | 1.59239           | 3.02978                   | 2.62963  |           |           |           |
| Si                                  | 1.01512           | 2.62199                   | 1.33452  |           |           |           |

**Statistical Thermodynamic Analysis**

Temperature=298.15 K

Pressure=1 atm

Zero-point correction= 0.225714

Electronic Energy = -1718.36215322

Internal Energy (E)= -1718.11945222

Enthalpy (H)= -1718.11850822

Gibbs Free Energy (G)=-1718.18290922

Gibbs Free Energy of Solvation=-1718.22015212

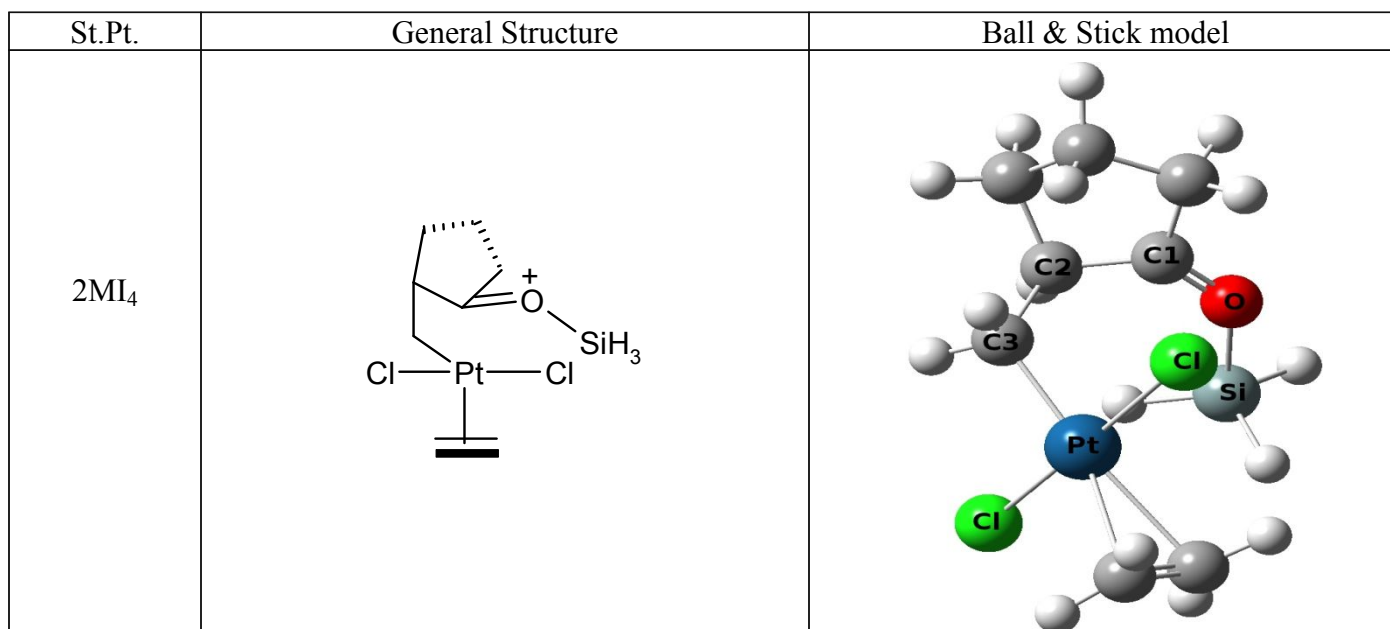

| <u>Cartesian co-ordinate</u> |          |          |          | <u>Frequencies</u> |           |           |
|------------------------------|----------|----------|----------|--------------------|-----------|-----------|
| Atoms                        | X        | Y        | Z        |                    |           |           |
| C                            | -2.79747 | -1.21331 | -1.10402 | 39.0444            | 62.9117   | 67.4153   |
| C                            | -2.56534 | -1.68821 | 0.14758  | 82.0062            | 83.2225   | 104.2807  |
| Pt                           | -1.02018 | 0.10203  | -0.20997 | 109.5490           | 136.5449  | 164.3161  |
| Cl                           | -2.52660 | 1.63739  | 0.64267  | 173.5958           | 181.5470  | 189.0081  |
| Cl                           | 0.78534  | -1.48926 | -1.01026 | 207.4705           | 218.0029  | 241.2098  |
| H                            | -1.93685 | -2.55869 | 0.31348  | 288.9677           | 341.5677  | 356.7094  |
| H                            | -3.10741 | -1.29492 | 1.00165  | 360.2199           | 366.6158  | 395.7558  |
| H                            | -3.53045 | -0.43182 | -1.27555 | 540.9595           | 571.8085  | 601.7523  |
| H                            | -2.36284 | -1.68950 | -1.97804 | 655.7415           | 666.8416  | 717.2191  |
| C                            | 1.74200  | 1.04390  | -0.59431 | 728.9466           | 764.9842  | 776.0421  |
| O                            | 2.22079  | -0.65276 | 1.09266  | 797.4699           | 825.7222  | 859.6164  |
| C                            | 2.14005  | -0.38150 | -0.23485 | 913.5961           | 954.1208  | 958.4033  |
| C                            | 0.43699  | 1.50797  | 0.02871  | 981.9580           | 997.5931  | 1011.7618 |
| H                            | 0.55097  | 1.71229  | 1.09799  | 1012.1547          | 1020.2608 | 1023.5893 |
| H                            | 0.09175  | 2.43351  | -0.43930 | 1062.0990          | 1064.7955 | 1110.8409 |
| C                            | 3.49367  | -0.58818 | -0.89087 | 1115.0153          | 1189.6504 | 1199.3830 |
| H                            | 4.01190  | -1.44603 | -0.46112 | 1208.8680          | 1217.0072 | 1232.0408 |
| C                            | 4.18336  | 0.77495  | -0.60351 | 1260.0976          | 1292.1185 | 1324.4458 |
| H                            | 4.89898  | 0.67885  | 0.21482  | 1332.2167          | 1351.7061 | 1354.9747 |
| H                            | 4.73649  | 1.11103  | -1.48275 | 1376.2928          | 1409.5012 | 1469.9969 |
| C                            | 3.04598  | 1.77145  | -0.22540 | 1487.1957          | 1491.8414 | 1502.3655 |
| H                            | 3.05366  | 1.97222  | 0.85007  | 1525.2789          | 1646.8333 | 2272.8577 |
| H                            | 3.13268  | 2.72856  | -0.74288 | 2286.9068          | 2289.9642 | 3074.2115 |
| H                            | 3.36291  | -0.74680 | -1.96325 | 3095.9059          | 3102.0677 | 3110.4034 |
| H                            | 1.64240  | 1.05291  | -1.68737 | 3118.6121          | 3148.7037 | 3155.6940 |
| H                            | 2.02968  | -1.49706 | 3.40469  | 3163.7737          | 3167.2753 | 3180.1460 |
| H                            | 0.51812  | 0.30408  | 2.86210  | 3182.5100          | 3261.6498 | 3283.7733 |
| H                            | 0.13270  | -1.92198 | 1.95842  |                    |           |           |
| Si                           | 1.15065  | -0.93027 | 2.36236  |                    |           |           |

**Statistical Thermodynamic Analysis**

Temperature=298.15 K

Pressure=1 atm

Zero-point correction= 0.227064

Electronic Energy = -1718.37401511

Internal Energy (E)= -1718.12983911

Enthalpy (H)= -1718.12889511

Gibbs Free Energy (G)=-1718.19339611

Gibbs Free Energy of Solvation=-1718.22009057



| St.Pt.                                           | General Structure                                                                 | Ball & Stick model                                                                  |                                               |           |           |           |
|--------------------------------------------------|-----------------------------------------------------------------------------------|-------------------------------------------------------------------------------------|-----------------------------------------------|-----------|-----------|-----------|
| 2MTS <sub>4</sub>                                | 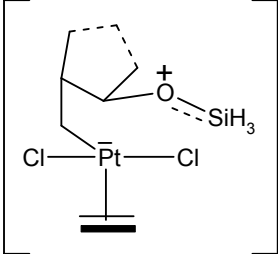 |  |                                               |           |           |           |
| <b><u>Cartesian co-ordinate</u></b>              |                                                                                   | <b><u>Frequencies</u></b>                                                           |                                               |           |           |           |
| -----<br>Atoms                                   | X                                                                                 | Y                                                                                   | Z                                             | -----     | -----     | -----     |
| -----                                            | -----                                                                             | -----                                                                               | -----                                         | -----     | -----     | -----     |
| C                                                | -2.83643                                                                          | -1.19736                                                                            | -0.91749                                      | -117.3324 | 46.3118   | 71.5226   |
| C                                                | -2.61682                                                                          | -1.47941                                                                            | 0.39640                                       | 83.7325   | 102.0531  | 116.3595  |
| Pt                                               | -0.96216                                                                          | 0.05597                                                                             | -0.28769                                      | 119.9352  | 137.3554  | 146.0408  |
| Cl                                               | -2.32536                                                                          | 1.85007                                                                             | 0.36303                                       | 165.9570  | 173.2281  | 192.7741  |
| Cl                                               | 0.49566                                                                           | -1.85025                                                                            | -0.78959                                      | 208.3189  | 220.3159  | 243.7991  |
| H                                                | -2.04786                                                                          | -2.35810                                                                            | 0.68444                                       | 251.1492  | 263.1045  | 285.1077  |
| H                                                | -3.12373                                                                          | -0.92065                                                                            | 1.17675                                       | 323.0193  | 369.3106  | 385.3421  |
| H                                                | -3.52088                                                                          | -0.40738                                                                            | -1.20985                                      | 544.5046  | 570.3171  | 582.2082  |
| H                                                | -2.44534                                                                          | -1.84356                                                                            | -1.69717                                      | 586.9737  | 644.7363  | 673.5575  |
| C                                                | 1.89682                                                                           | 0.76053                                                                             | -0.69247                                      | 686.1201  | 718.3152  | 771.5828  |
| O                                                | 2.01984                                                                           | -0.46363                                                                            | 1.45223                                       | 788.9028  | 828.4841  | 837.1173  |
| C                                                | 2.36814                                                                           | -0.30291                                                                            | 0.24271                                       | 913.5007  | 918.2187  | 921.2650  |
| C                                                | 0.57392                                                                           | 1.40811                                                                             | -0.37455                                      | 968.0304  | 990.8513  | 999.6507  |
| H                                                | 0.61865                                                                           | 1.99544                                                                             | 0.54839                                       | 1009.0506 | 1023.4022 | 1025.5393 |
| H                                                | 0.31075                                                                           | 2.10854                                                                             | -1.17346                                      | 1034.7591 | 1064.8536 | 1087.8912 |
| C                                                | 3.73762                                                                           | -0.76978                                                                            | -0.16180                                      | 1114.2268 | 1176.3560 | 1199.2008 |
| H                                                | 4.30541                                                                           | -1.05561                                                                            | 0.72469                                       | 1214.2614 | 1222.2472 | 1239.9097 |
| C                                                | 4.29516                                                                           | 0.47736                                                                             | -0.90624                                      | 1246.0191 | 1304.4879 | 1310.4302 |
| H                                                | 5.27165                                                                           | 0.77252                                                                             | -0.51983                                      | 1314.6302 | 1345.0257 | 1349.7749 |
| H                                                | 4.41014                                                                           | 0.25960                                                                             | -1.97018                                      | 1434.2493 | 1466.1864 | 1468.1396 |
| C                                                | 3.21847                                                                           | 1.57369                                                                             | -0.70962                                      | 1486.1391 | 1502.3221 | 1518.1138 |
| H                                                | 3.35604                                                                           | 2.10073                                                                             | 0.24184                                       | 1636.7751 | 1638.8247 | 2286.7154 |
| H                                                | 3.20724                                                                           | 2.31728                                                                             | -1.50811                                      | 2344.8857 | 2373.2703 | 3076.3880 |
| H                                                | 3.63858                                                                           | -1.64611                                                                            | -0.80771                                      | 3089.3116 | 3097.5295 | 3109.0186 |
| H                                                | 1.84449                                                                           | 0.27049                                                                             | -1.67196                                      | 3118.3567 | 3140.1624 | 3155.2015 |
| H                                                | 1.37395                                                                           | -0.50262                                                                            | 3.80525                                       | 3164.5352 | 3173.0962 | 3183.0893 |
| H                                                | 0.05739                                                                           | 1.03851                                                                             | 2.48585                                       | 3189.3966 | 3268.1656 | 3292.0434 |
| H                                                | -0.24445                                                                          | -1.42490                                                                            | 2.25542                                       |           |           |           |
| Si                                               | 0.65439                                                                           | -0.29853                                                                            | 2.53195                                       |           |           |           |
| <b><u>Statistical Thermodynamic Analysis</u></b> |                                                                                   |                                                                                     |                                               |           |           |           |
| Temperature=298.15 K                             |                                                                                   |                                                                                     | Pressure=1 atm                                |           |           |           |
| Zero-point correction= 0.226320                  |                                                                                   |                                                                                     | Electronic Energy = -1718.36290578            |           |           |           |
| Internal Energy (E)= -1718.11992778              |                                                                                   |                                                                                     | Enthalpy (H)= -1718.11898378                  |           |           |           |
| Gibbs Free Energy (G)=-1718.18174178             |                                                                                   |                                                                                     | Gibbs Free Energy of Solvation=-1718.21486308 |           |           |           |

| St.Pt.                                           | General Structure | Ball & Stick model        |                |           |           |           |
|--------------------------------------------------|-------------------|---------------------------|----------------|-----------|-----------|-----------|
| 2MI <sub>5</sub>                                 |                   |                           |                |           |           |           |
| <b><u>Cartesian co-ordinate</u></b>              |                   | <b><u>Frequencies</u></b> |                |           |           |           |
| -----<br>Atoms                                   | X                 | Y                         | Z              |           |           |           |
| -----                                            |                   |                           |                |           |           |           |
| C                                                | 2.99291           | 0.34150                   | -1.21704       | 33.7550   | 46.9522   | 73.2920   |
| C                                                | 2.75174           | 1.31051                   | -0.28970       | 90.7891   | 104.7089  | 115.9777  |
| Pt                                               | 0.97243           | -0.22013                  | -0.21125       | 125.8055  | 138.7219  | 150.0007  |
| Cl                                               | 2.11131           | -1.45419                  | 1.45176        | 165.6524  | 172.7473  | 184.2361  |
| Cl                                               | -0.18054          | 1.17256                   | -1.81363       | 215.7564  | 224.8842  | 236.7876  |
| H                                                | 2.27734           | 2.24286                   | -0.58002       | 271.8630  | 280.1703  | 295.7681  |
| H                                                | 3.16352           | 1.23275                   | 0.71169        | 313.4062  | 375.1652  | 397.2950  |
| H                                                | 3.59721           | -0.52507                  | -0.96851       | 483.1493  | 567.7131  | 588.9441  |
| H                                                | 2.70967           | 0.48550                   | -2.25476       | 606.6657  | 626.4217  | 657.4244  |
| C                                                | -2.01487          | -0.82962                  | -0.24429       | 688.3309  | 698.6332  | 752.0182  |
| O                                                | -2.03996          | 1.30732                   | 0.99728        | 805.8786  | 836.1840  | 859.8038  |
| C                                                | -2.58923          | 0.39894                   | 0.32486        | 903.1026  | 915.7653  | 942.4867  |
| C                                                | -0.68134          | -1.32360                  | 0.27358        | 947.3691  | 968.6532  | 1007.4455 |
| H                                                | -0.71946          | -1.48761                  | 1.35618        | 1016.9303 | 1020.5057 | 1025.5297 |
| H                                                | -0.48889          | -2.30373                  | -0.17768       | 1048.4429 | 1058.7815 | 1093.8972 |
| C                                                | -4.06644          | 0.47441                   | 0.08310        | 1120.6563 | 1159.3318 | 1199.3925 |
| H                                                | -4.53432          | 0.50176                   | 1.07640        | 1212.6556 | 1227.7974 | 1238.2940 |
| C                                                | -4.39377          | -0.82340                  | -0.67114       | 1241.3532 | 1270.5459 | 1317.6559 |
| H                                                | -5.38215          | -1.21031                  | -0.42052       | 1327.1260 | 1347.0003 | 1349.4854 |
| H                                                | -4.36452          | -0.64427                  | -1.74970       | 1407.4392 | 1434.9408 | 1462.4001 |
| C                                                | -3.24560          | -1.76530                  | -0.27104       | 1474.9927 | 1507.2834 | 1521.3469 |
| H                                                | -3.41111          | -2.19560                  | 0.72347        | 1632.9198 | 1696.0040 | 2278.0422 |
| H                                                | -3.09577          | -2.58647                  | -0.97290       | 2359.5186 | 2393.8271 | 2936.0714 |
| H                                                | -4.33031          | 1.41097                   | -0.41668       | 3070.8929 | 3076.9859 | 3090.2859 |
| H                                                | -1.88054          | -0.48346                  | -1.29378       | 3100.6800 | 3127.0087 | 3135.8806 |
| H                                                | -1.15366          | 2.65532                   | 2.82428        | 3161.1771 | 3167.6967 | 3173.3383 |
| H                                                | 0.04997           | 0.58237                   | 2.46913        | 3184.4067 | 3270.5356 | 3290.7319 |
| H                                                | 0.27019           | 2.52322                   | 0.87451        |           |           |           |
| Si                                               | -0.54149          | 1.75720                   | 1.82285        |           |           |           |
| <b><u>Statistical Thermodynamic Analysis</u></b> |                   |                           |                |           |           |           |
| Temperature=298.15 K                             |                   |                           | Pressure=1 atm |           |           |           |

Zero-point correction= 0.225765

Internal Energy (E)= -1718.12103937

Gibbs Free Energy (G)=-1718.18529837

Electronic Energy = -1718.36427637

Enthalpy (H)= -1718.12009537

Gibbs Free Energy of Solvation=-1718.22310871

| St.Pt.                                           | General Structure                                                                 | Ball & Stick model                                                                 |                                    |           |           |           |
|--------------------------------------------------|-----------------------------------------------------------------------------------|------------------------------------------------------------------------------------|------------------------------------|-----------|-----------|-----------|
| 2MTS <sub>5</sub>                                | 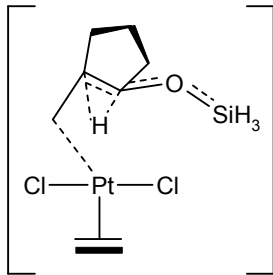 |  |                                    |           |           |           |
| <b><u>Cartesian co-ordinate</u></b>              |                                                                                   | <b><u>Frequencies</u></b>                                                          |                                    |           |           |           |
| -----<br>Atoms                                   | X                                                                                 | Y                                                                                  | Z                                  | -----     |           |           |
| -----                                            |                                                                                   |                                                                                    |                                    | -----     |           |           |
| C                                                | 2.75398                                                                           | -0.94527                                                                           | -1.22310                           | -360.4065 | 33.0200   | 52.5418   |
| C                                                | 2.53821                                                                           | 0.37929                                                                            | -1.51501                           | 62.3870   | 89.3121   | 97.4226   |
| Pt                                               | 1.00259                                                                           | -0.24846                                                                           | 0.02429                            | 120.2014  | 137.0455  | 141.0776  |
| Cl                                               | 2.44664                                                                           | 0.41072                                                                            | 1.74473                            | 158.1323  | 165.4982  | 180.7488  |
| Cl                                               | -0.53329                                                                          | -0.86199                                                                           | -1.76290                           | 188.8726  | 191.6852  | 201.7266  |
| H                                                | 1.95754                                                                           | 0.66640                                                                            | -2.38616                           | 259.3945  | 275.0249  | 281.0923  |
| H                                                | 3.09666                                                                           | 1.15541                                                                            | -1.00206                           | 326.9641  | 375.5574  | 404.9954  |
| H                                                | 3.48626                                                                           | -1.23356                                                                           | -0.47585                           | 428.9622  | 541.1123  | 588.2769  |
| H                                                | 2.34932                                                                           | -1.72609                                                                           | -1.85937                           | 631.6997  | 652.9610  | 687.5862  |
| C                                                | -1.86080                                                                          | -0.40919                                                                           | 0.94343                            | 710.1710  | 733.4747  | 736.7072  |
| O                                                | -2.39597                                                                          | 1.74929                                                                            | -0.08720                           | 771.5320  | 836.1204  | 845.1358  |
| C                                                | -2.64284                                                                          | 0.47039                                                                            | 0.19846                            | 883.3436  | 940.7037  | 942.9676  |
| C                                                | -0.51549                                                                          | -0.17486                                                                           | 1.46966                            | 964.1307  | 976.5118  | 987.7076  |
| H                                                | -0.42139                                                                          | 0.80422                                                                            | 1.94311                            | 1020.8723 | 1031.4096 | 1038.2435 |
| H                                                | -0.24817                                                                          | -0.95053                                                                           | 2.19063                            | 1046.8746 | 1057.8867 | 1068.6800 |
| C                                                | -4.01544                                                                          | -0.09204                                                                           | -0.09022                           | 1105.5694 | 1151.6459 | 1183.0104 |
| H                                                | -4.71692                                                                          | 0.33970                                                                            | 0.63249                            | 1227.3113 | 1229.9999 | 1235.8615 |
| C                                                | -3.80634                                                                          | -1.60147                                                                           | 0.12099                            | 1239.8649 | 1273.9507 | 1318.4336 |
| H                                                | -4.70079                                                                          | -2.10706                                                                           | 0.48545                            | 1332.7584 | 1344.4023 | 1354.0848 |
| H                                                | -3.52161                                                                          | -2.06154                                                                           | -0.82958                           | 1388.1410 | 1435.0821 | 1468.1694 |
| C                                                | -2.62199                                                                          | -1.70441                                                                           | 1.10473                            | 1482.5803 | 1493.9254 | 1498.6425 |
| H                                                | -2.95578                                                                          | -1.74782                                                                           | 2.14866                            | 1517.2541 | 1616.0960 | 1703.1233 |
| H                                                | -1.97682                                                                          | -2.56884                                                                           | 0.92541                            | 2277.5442 | 2291.3066 | 2306.8228 |
| H                                                | -4.35531                                                                          | 0.17534                                                                            | -1.09251                           | 3081.4581 | 3095.7622 | 3105.0913 |
| H                                                | -1.82143                                                                          | -0.35755                                                                           | -0.50293                           | 3115.4495 | 3141.9143 | 3155.0050 |
| H                                                | -1.66246                                                                          | 4.03717                                                                            | -0.63417                           | 3169.9861 | 3173.8623 | 3184.8543 |
| H                                                | -0.13030                                                                          | 2.77692                                                                            | 0.75603                            | 3194.3091 | 3269.7059 | 3295.9570 |
| H                                                | -0.34785                                                                          | 2.25053                                                                            | -1.61626                           |           |           |           |
| Si                                               | -1.04055                                                                          | 2.71924                                                                            | -0.40174                           |           |           |           |
| <b><u>Statistical Thermodynamic Analysis</u></b> |                                                                                   |                                                                                    |                                    |           |           |           |
| Temperature=298.15 K                             |                                                                                   |                                                                                    | Pressure=1 atm                     |           |           |           |
| Zero-point correction= 0.221722                  |                                                                                   |                                                                                    | Electronic Energy = -1718.35438845 |           |           |           |
| Internal Energy (E)= -1718.11562045              |                                                                                   |                                                                                    | Enthalpy (H)= -1718.11467645       |           |           |           |

Gibbs Free Energy (G)=-1718.17921845    Gibbs Free Energy of Solvation=-1718.21035325

| St.Pt.                                           | General Structure                                                                 | Ball & Stick model                                                                 |                                    |           |           |           |
|--------------------------------------------------|-----------------------------------------------------------------------------------|------------------------------------------------------------------------------------|------------------------------------|-----------|-----------|-----------|
| 2MI <sub>6</sub>                                 | 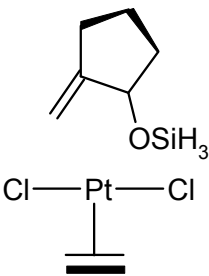 |  |                                    |           |           |           |
| <b><u>Cartesian co-ordinate</u></b>              |                                                                                   | <b><u>Frequencies</u></b>                                                          |                                    |           |           |           |
| Atoms                                            | X                                                                                 | Y                                                                                  | Z                                  | 28.5562   | 43.8150   | 64.7438   |
| C                                                | 2.77175                                                                           | -1.00831                                                                           | -0.66483                           | 69.8211   | 104.9949  | 111.1154  |
| C                                                | 2.34410                                                                           | 0.03719                                                                            | -1.48505                           | 131.4826  | 156.0435  | 172.8344  |
| Pt                                               | 0.90491                                                                           | -0.24514                                                                           | 0.09212                            | 182.9529  | 201.8576  | 206.0246  |
| Cl                                               | 2.18150                                                                           | 1.27143                                                                            | 1.38433                            | 223.1218  | 251.8899  | 268.4368  |
| Cl                                               | -0.15014                                                                          | -1.84963                                                                           | -1.31580                           | 299.6021  | 305.8270  | 321.2729  |
| H                                                | 1.81931                                                                           | -0.17589                                                                           | -2.41086                           | 364.3678  | 376.6065  | 405.0036  |
| H                                                | 2.74344                                                                           | 1.03654                                                                            | -1.34485                           | 487.3214  | 510.4327  | 583.9555  |
| H                                                | 3.50632                                                                           | -0.82283                                                                           | 0.11182                            | 604.6588  | 732.2646  | 738.3796  |
| H                                                | 2.58375                                                                           | -2.03722                                                                           | -0.95326                           | 757.9879  | 773.2908  | 830.7898  |
| C                                                | -1.59191                                                                          | -0.23061                                                                           | 0.91909                            | 846.3405  | 858.7198  | 879.2825  |
| O                                                | -2.33407                                                                          | 1.80714                                                                            | -0.22264                           | 902.9121  | 924.9713  | 946.9939  |
| C                                                | -2.40249                                                                          | 0.40764                                                                            | -0.19367                           | 975.1998  | 987.4640  | 1005.7142 |
| C                                                | -0.69262                                                                          | 0.44649                                                                            | 1.68235                            | 1021.5537 | 1035.0250 | 1037.1181 |
| H                                                | -0.55248                                                                          | 1.51400                                                                            | 1.54680                            | 1039.5306 | 1077.5304 | 1081.9634 |
| H                                                | -0.28582                                                                          | 0.00940                                                                            | 2.59037                            | 1092.0650 | 1166.7266 | 1204.9637 |
| C                                                | -3.79691                                                                          | -0.15712                                                                           | 0.08945                            | 1229.9566 | 1236.2475 | 1240.6122 |
| H                                                | -4.21329                                                                          | 0.34587                                                                            | 0.96967                            | 1260.1761 | 1298.0810 | 1318.3436 |
| C                                                | -3.48225                                                                          | -1.63158                                                                           | 0.38149                            | 1324.4673 | 1337.2437 | 1351.1849 |
| H                                                | -4.29495                                                                          | -2.14892                                                                           | 0.89352                            | 1430.4274 | 1445.3999 | 1464.0628 |
| H                                                | -3.28609                                                                          | -2.15670                                                                           | -0.55816                           | 1469.8309 | 1504.5103 | 1520.4429 |
| C                                                | -2.18664                                                                          | -1.58876                                                                           | 1.22544                            | 1581.1175 | 1672.4320 | 2249.7537 |
| H                                                | -2.40378                                                                          | -1.62934                                                                           | 2.29795                            | 2258.1812 | 2274.7545 | 3060.4314 |
| H                                                | -1.50384                                                                          | -2.40560                                                                           | 0.98537                            | 3083.1750 | 3088.1208 | 3100.2743 |
| H                                                | -4.47688                                                                          | -0.00745                                                                           | -0.75108                           | 3152.7829 | 3153.4567 | 3172.6234 |
| H                                                | -2.05715                                                                          | -0.02617                                                                           | -1.14488                           | 3179.3974 | 3184.8953 | 3192.4573 |
| H                                                | -1.87383                                                                          | 3.85709                                                                            | -1.64630                           | 3278.8157 | 3283.8220 | 3299.7128 |
| H                                                | -0.01235                                                                          | 2.97982                                                                            | -0.37557                           |           |           |           |
| H                                                | -0.82451                                                                          | 1.75110                                                                            | -2.29313                           |           |           |           |
| Si                                               | -1.22069                                                                          | 2.62572                                                                            | -1.15800                           |           |           |           |
| <b><u>Statistical Thermodynamic Analysis</u></b> |                                                                                   |                                                                                    |                                    |           |           |           |
| Temperature=298.15 K                             |                                                                                   |                                                                                    | Pressure=1 atm                     |           |           |           |
| Zero-point correction= 0.228023                  |                                                                                   |                                                                                    | Electronic Energy = -1718.38996547 |           |           |           |

Internal Energy (E)= -1718.14498647

Enthalpy (H)= -1718.14404247

Gibbs Free Energy (G)=-1718.20844847

Gibbs Free Energy of Solvation=-1718.23996996

| St.Pt.                              | General Structure | Ball & Stick model        |          |           |           |           |
|-------------------------------------|-------------------|---------------------------|----------|-----------|-----------|-----------|
| 2D1 <sub>1</sub>                    |                   |                           |          |           |           |           |
| <b><u>Cartesian co-ordinate</u></b> |                   | <b><u>Frequencies</u></b> |          |           |           |           |
| -----<br>Atoms                      | X                 | Y                         | Z        |           |           |           |
| -----                               |                   |                           |          |           |           |           |
| C                                   | -1.75284          | -2.94122                  | -1.33491 | 14.5043   | 35.4889   | 51.0108   |
| C                                   | -0.73092          | -3.28460                  | -0.44388 | 62.9612   | 69.8840   | 75.1540   |
| Pt                                  | -1.19404          | -1.21609                  | -0.22418 | 81.2779   | 94.4883   | 95.4710   |
| Cl                                  | -2.78776          | -1.68551                  | 1.39995  | 102.8919  | 112.1942  | 125.8987  |
| Cl                                  | 0.48294           | -0.60632                  | -1.83999 | 138.5968  | 149.8350  | 159.8290  |
| H                                   | 0.30486           | -3.32774                  | -0.76628 | 162.1078  | 167.1817  | 178.8576  |
| H                                   | -0.96673          | -3.74679                  | 0.50978  | 189.7919  | 195.8421  | 206.1925  |
| H                                   | -2.78802          | -3.15227                  | -1.08619 | 208.9733  | 230.7490  | 255.5238  |
| H                                   | -1.52388          | -2.73842                  | -2.37688 | 278.8199  | 283.9976  | 314.8938  |
| Pt                                  | 2.09597           | 0.21262                   | -0.09363 | 325.7377  | 344.1361  | 382.7201  |
| Cl                                  | 2.04110           | 2.38360                   | -0.99565 | 402.5997  | 413.3160  | 443.9414  |
| Cl                                  | 2.11857           | -1.93430                  | 0.89710  | 455.3551  | 509.3372  | 518.1794  |
| H                                   | 4.47275           | 1.34222                   | 0.12452  | 540.9533  | 618.6513  | 660.0618  |
| C                                   | 3.99098           | 0.60597                   | 0.76015  | 709.0908  | 766.9229  | 770.9190  |
| C                                   | 2.99045           | 1.00505                   | 1.65886  | 788.1966  | 809.3916  | 827.5739  |
| H                                   | 4.48347           | -0.35298                  | 0.88588  | 844.4495  | 846.8357  | 871.4128  |
| H                                   | 2.71659           | 0.35459                   | 2.48401  | 897.2012  | 922.8478  | 949.6671  |
| H                                   | 2.71097           | 2.05178                   | 1.72236  | 960.5665  | 978.1467  | 981.8886  |
| C                                   | -1.59081          | 3.20895                   | -0.21512 | 990.9489  | 1016.2596 | 1023.0133 |
| O                                   | -1.09909          | 0.82062                   | 0.53930  | 1023.7436 | 1038.4909 | 1065.7158 |
| C                                   | -1.96225          | 1.75652                   | -0.10699 | 1077.1153 | 1083.0376 | 1085.1933 |
| C                                   | -1.54168          | 2.29988                   | -1.42578 | 1091.2172 | 1095.7435 | 1098.8084 |
| H                                   | -2.28796          | 2.39003                   | -2.20977 | 1131.9218 | 1190.7182 | 1213.6222 |
| H                                   | -0.53976          | 2.04569                   | -1.75327 | 1226.0263 | 1235.5373 | 1251.4321 |
| C                                   | -3.44544          | 1.63769                   | 0.18345  | 1269.7757 | 1284.3086 | 1297.2156 |
| H                                   | -3.91601          | 0.80872                   | -0.35507 | 1299.2594 | 1346.8560 | 1354.2716 |
| C                                   | -4.00340          | 3.01659                   | -0.21921 | 1369.7463 | 1416.9372 | 1466.0482 |
| H                                   | -4.27267          | 3.01404                   | -1.27918 | 1479.3108 | 1496.8986 | 1503.4565 |
| H                                   | -4.90636          | 3.27294                   | 0.33820  | 1511.4092 | 1533.9255 | 1569.1239 |
| C                                   | -2.85325          | 4.01631                   | 0.02876  | 1582.5251 | 2277.3051 | 2292.3309 |
| H                                   | -2.92756          | 4.89838                   | -0.61362 | 2318.3905 | 3077.3989 | 3084.1846 |
| H                                   | -2.86402          | 4.36149                   | 1.06902  | 3107.0629 | 3131.2943 | 3133.6250 |
| H                                   | -3.58793          | 1.45316                   | 1.25403  | 3161.6551 | 3172.0217 | 3179.4881 |
| H                                   | -0.62623          | 3.55574                   | 0.14319  | 3183.5885 | 3188.1903 | 3190.4944 |
| H                                   | 0.01659           | -0.13030                  | 2.59648  | 3217.3385 | 3272.7622 | 3278.4726 |
| H                                   | 0.21099           | 2.27726                   | 2.21343  | 3282.6506 | 3293.4738 | 3297.2037 |
| H                                   | -1.90260          | 1.36531                   | 2.95520  |           |           |           |



|                                                  |          |                                               |         |  |
|--------------------------------------------------|----------|-----------------------------------------------|---------|--|
| Si                                               | -0.67870 | 1.09709                                       | 2.17592 |  |
| <b><u>Statistical Thermodynamic Analysis</u></b> |          |                                               |         |  |
| Temperature=298.15 K                             |          | Pressure=1 atm                                |         |  |
| Zero-point correction= 0.288054                  |          | Electronic Energy = -2836.39105627            |         |  |
| Internal Energy (E)= -2836.07782927              |          | Enthalpy (H)= -2836.07688527                  |         |  |
| Gibbs Free Energy (G)=-2836.16115827             |          | Gibbs Free Energy of Solvation=-2836.21974765 |         |  |

| St.Pt.                              | General Structure                                                                 | Ball & Stick model                                                                 |          |           |           |           |
|-------------------------------------|-----------------------------------------------------------------------------------|------------------------------------------------------------------------------------|----------|-----------|-----------|-----------|
| 2DTS <sub>1</sub>                   | 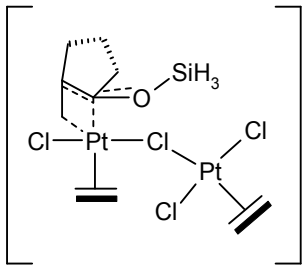 |  |          |           |           |           |
| <b><u>Cartesian co-ordinate</u></b> |                                                                                   | <b><u>Frequencies</u></b>                                                          |          |           |           |           |
| -----<br>Atoms                      | X                                                                                 | Y                                                                                  | Z        |           |           |           |
| -----                               |                                                                                   |                                                                                    |          |           |           |           |
| C                                   | -2.07859                                                                          | -2.98521                                                                           | -0.52129 | -262.4137 | 22.3483   | 33.9021   |
| C                                   | -1.53617                                                                          | -2.72317                                                                           | 0.72310  | 50.1672   | 58.9295   | 70.2863   |
| Pt                                  | -1.65906                                                                          | -0.81632                                                                           | -0.39505 | 81.2918   | 93.6386   | 97.9023   |
| Cl                                  | -3.84294                                                                          | -0.49545                                                                           | 0.37725  | 112.5264  | 118.3354  | 129.1823  |
| Cl                                  | 0.48583                                                                           | -1.30942                                                                           | -1.41822 | 135.6270  | 146.4031  | 155.4025  |
| H                                   | -0.47270                                                                          | -2.85488                                                                           | 0.91294  | 162.9187  | 166.7438  | 169.6382  |
| H                                   | -2.19059                                                                          | -2.59248                                                                           | 1.57948  | 182.4348  | 192.1043  | 197.9115  |
| H                                   | -3.15380                                                                          | -3.05987                                                                           | -0.64722 | 232.4033  | 243.7327  | 249.3971  |
| H                                   | -1.45203                                                                          | -3.34606                                                                           | -1.33084 | 277.6260  | 294.6621  | 305.0571  |
| Pt                                  | 2.22436                                                                           | -0.07035                                                                           | -0.16269 | 314.0062  | 316.1565  | 319.2542  |
| Cl                                  | 2.20553                                                                           | 1.63552                                                                            | -1.79638 | 328.9370  | 382.1979  | 410.0186  |
| Cl                                  | 2.17780                                                                           | -1.73874                                                                           | 1.50871  | 413.7763  | 454.9206  | 487.3639  |
| H                                   | 4.66681                                                                           | 0.84927                                                                            | -0.57242 | 518.9761  | 535.8107  | 627.0102  |
| C                                   | 4.22632                                                                           | 0.42424                                                                            | 0.32379  | 685.1184  | 690.5573  | 702.0970  |
| C                                   | 3.35718                                                                           | 1.18951                                                                            | 1.11347  | 751.7604  | 773.6255  | 775.1425  |
| H                                   | 4.68289                                                                           | -0.47175                                                                           | 0.73234  | 803.2116  | 837.4744  | 841.0144  |
| H                                   | 3.15907                                                                           | 0.88669                                                                            | 2.13637  | 841.3597  | 891.7597  | 913.3184  |
| H                                   | 3.12490                                                                           | 2.21254                                                                            | 0.83594  | 930.3942  | 941.1096  | 973.6254  |
| C                                   | -1.02161                                                                          | 2.66641                                                                            | -0.63782 | 983.6648  | 993.7382  | 1016.3302 |
| O                                   | -0.12125                                                                          | 1.42224                                                                            | 1.23639  | 1040.1590 | 1042.7674 | 1049.4574 |
| C                                   | -1.15928                                                                          | 1.92740                                                                            | 0.57943  | 1056.1448 | 1066.0909 | 1066.7113 |
| C                                   | -1.47989                                                                          | 1.22938                                                                            | -1.15493 | 1073.4370 | 1119.9995 | 1133.3892 |
| H                                   | -2.46444                                                                          | 1.33155                                                                            | -1.60620 | 1169.9084 | 1193.0272 | 1231.8838 |
| H                                   | -0.67626                                                                          | 0.97505                                                                            | -1.84566 | 1232.3080 | 1233.6862 | 1258.0496 |
| C                                   | -2.44573                                                                          | 2.30918                                                                            | 1.27792  | 1286.4391 | 1294.7498 | 1311.1151 |
| H                                   | -2.98973                                                                          | 1.47633                                                                            | 1.72362  | 1321.3909 | 1341.7480 | 1351.1823 |
| C                                   | -3.23464                                                                          | 3.08675                                                                            | 0.21831  | 1388.6334 | 1402.7134 | 1466.4007 |
| H                                   | -3.87597                                                                          | 2.39265                                                                            | -0.33091 | 1469.1222 | 1469.6475 | 1502.6796 |
| H                                   | -3.87592                                                                          | 3.84943                                                                            | 0.66221  | 1520.6847 | 1559.0619 | 1572.4059 |
| C                                   | -2.14702                                                                          | 3.68649                                                                            | -0.69622 | 1600.2169 | 2270.8503 | 2309.8020 |
| H                                   | -2.49317                                                                          | 3.86292                                                                            | -1.71745 | 2354.1001 | 3056.6264 | 3092.3756 |
| H                                   | -1.78101                                                                          | 4.63705                                                                            | -0.29263 | 3111.3369 | 3118.1124 | 3146.9248 |
| H                                   | -2.11129                                                                          | 2.98156                                                                            | 2.08135  | 3160.5294 | 3165.4992 | 3174.3030 |
| H                                   | -0.02156                                                                          | 2.90710                                                                            | -0.98877 | 3178.3721 | 3181.2643 | 3188.8375 |
| H                                   | -0.73300                                                                          | -0.77643                                                                           | 2.51443  | 3206.1306 | 3235.5705 | 3262.5564 |
|                                     |                                                                                   |                                                                                    |          | 3277.4750 | 3285.3143 | 3295.9267 |

|                                                  |          |                                              |         |  |
|--------------------------------------------------|----------|----------------------------------------------|---------|--|
| H                                                | 1.16747  | 0.61660                                      | 3.24313 |  |
| H                                                | -1.10396 | 1.35367                                      | 3.60905 |  |
| Si                                               | -0.20416 | 0.58024                                      | 2.72472 |  |
| <b><u>Statistical Thermodynamic Analysis</u></b> |          |                                              |         |  |
| Temperature=298.15 K                             |          | Pressure=1 atm                               |         |  |
| Zero-point correction= 0.285526                  |          | Electronic Energy = -2836.36186683           |         |  |
| Internal Energy (E)= -2836.05138083              |          | Enthalpy (H)= -2836.05043683                 |         |  |
| Gibbs Free Energy (G)=-2836.13340783             |          | Gibbs Free Energy of Solvation=-2836.1900671 |         |  |

| St.Pt.                              | General Structure | Ball & Stick model        |          |           |           |           |
|-------------------------------------|-------------------|---------------------------|----------|-----------|-----------|-----------|
| 2D1 <sub>2</sub>                    |                   |                           |          |           |           |           |
| <b><u>Cartesian co-ordinate</u></b> |                   | <b><u>Frequencies</u></b> |          |           |           |           |
| -----<br>Atoms                      | X                 | Y                         | Z        |           |           |           |
| -----                               |                   |                           |          |           |           |           |
| C                                   | -1.89405          | -3.05299                  | -0.18111 | 6.6773    | 38.9675   | 47.6529   |
| C                                   | -1.46525          | -2.57152                  | 1.00110  | 57.6057   | 63.2830   | 73.1755   |
| Pt                                  | -1.86900          | -0.50985                  | -0.52681 | 87.2002   | 95.7839   | 108.8221  |
| Cl                                  | -4.13661          | -0.51210                  | 0.02882  | 114.8466  | 117.3698  | 123.2746  |
| Cl                                  | 0.31480           | -0.75052                  | -1.54449 | 140.4689  | 145.1917  | 150.2073  |
| H                                   | -0.40066          | -2.47264                  | 1.20393  | 158.5255  | 163.8407  | 167.1875  |
| H                                   | -2.17207          | -2.33924                  | 1.79397  | 174.5176  | 184.5170  | 200.8595  |
| H                                   | -2.95006          | -3.21995                  | -0.37451 | 217.0482  | 222.6944  | 244.8078  |
| H                                   | -1.18157          | -3.34529                  | -0.94835 | 253.2673  | 277.1500  | 288.2700  |
| Pt                                  | 2.32195           | -0.02976                  | -0.21468 | 301.9285  | 310.5144  | 326.6820  |
| Cl                                  | 2.39774           | 1.99666                   | -1.40267 | 333.5971  | 352.8242  | 418.2629  |
| Cl                                  | 2.20383           | -2.02765                  | 1.05673  | 419.6259  | 425.5033  | 504.8943  |
| H                                   | 4.79532           | 0.50812                   | -0.95691 | 524.0491  | 542.8139  | 595.6152  |
| C                                   | 4.42649           | -0.03971                  | -0.09539 | 661.1890  | 717.0219  | 726.3324  |
| C                                   | 3.90087           | 0.65319                   | 1.00933  | 774.7683  | 784.8148  | 816.3741  |
| H                                   | 4.73689           | -1.07461                  | 0.01042  | 830.8145  | 845.5419  | 849.8975  |
| H                                   | 3.82917           | 0.14960                   | 1.96818  | 862.0428  | 877.7295  | 923.3161  |
| H                                   | 3.87751           | 1.73819                   | 1.00598  | 937.6954  | 957.8635  | 985.6406  |
| C                                   | -1.24123          | 2.13609                   | -0.36692 | 998.5994  | 1011.8610 | 1014.2991 |
| O                                   | -0.07705          | 0.78292                   | 1.32577  | 1032.0856 | 1041.1779 | 1044.8197 |
| C                                   | -1.24896          | 1.16371                   | 0.81087  | 1065.5278 | 1067.5279 | 1082.1278 |
| C                                   | -1.97651          | 1.29968                   | -1.42417 | 1086.5664 | 1103.9845 | 1160.1848 |
| H                                   | -3.02445          | 1.57215                   | -1.55417 | 1182.7160 | 1197.0842 | 1217.5351 |
| H                                   | -1.44796          | 1.22981                   | -2.37451 | 1228.5049 | 1248.2176 | 1259.7449 |
| C                                   | -2.36907          | 1.56388                   | 1.76840  | 1274.6219 | 1283.5344 | 1314.8823 |
| H                                   | -2.97488          | 0.72913                   | 2.12295  | 1274.6219 | 1283.5344 | 1314.8823 |
| C                                   | -3.14639          | 2.65573                   | 1.02202  | 1330.9650 | 1339.4289 | 1360.9672 |
| H                                   | -3.93250          | 2.20295                   | 0.41311  | 1378.4111 | 1413.4196 | 1458.5810 |
| H                                   | -3.61772          | 3.35616                   | 1.71417  | 1463.1654 | 1467.4421 | 1475.6029 |
| C                                   | -2.07343          | 3.31956                   | 0.14160  | 1497.5961 | 1520.7652 | 1562.3062 |
| H                                   | -2.49289          | 3.89975                   | -0.68446 | 1673.2951 | 2260.9013 | 2303.8493 |
| H                                   | -1.44650          | 3.98759                   | 0.74262  | 2362.0430 | 3080.2345 | 3087.3172 |
| H                                   | -1.86077          | 2.01638                   | 2.62899  | 3114.3755 | 3122.3505 | 3144.3075 |
| H                                   | -0.21680          | 2.36704                   | -0.67117 | 3146.8689 | 3152.0633 | 3168.4293 |
|                                     |                   |                           |          | 3168.8534 | 3172.4851 | 3175.0811 |
|                                     |                   |                           |          | 3177.5852 | 3205.9825 | 3252.8742 |
|                                     |                   |                           |          | 3271.2478 | 3272.6252 | 3286.0058 |

|    |          |          |         |
|----|----------|----------|---------|
| H  | -0.27151 | 1.23155  | 3.85865 |
| H  | -0.34285 | -1.07292 | 3.15294 |
| H  | 1.74173  | 0.23563  | 2.99011 |
| Si | 0.27918  | 0.23945  | 2.90865 |

**Statistical Thermodynamic Analysis**

|                                      |                                               |
|--------------------------------------|-----------------------------------------------|
| Temperature=298.15 K                 | Pressure=1 atm                                |
| Zero-point correction= 0.285485      | Electronic Energy = -2836.36942292            |
| Internal Energy (E)= -2836.05801092  | Enthalpy (H)= -2836.05706692                  |
| Gibbs Free Energy (G)=-2836.14345092 | Gibbs Free Energy of Solvation=-2836.20108534 |

| St.Pt.                              | General Structure                                                                 | Ball & Stick model                                                                 |          |           |           |           |
|-------------------------------------|-----------------------------------------------------------------------------------|------------------------------------------------------------------------------------|----------|-----------|-----------|-----------|
| 2DTS <sub>2</sub>                   | 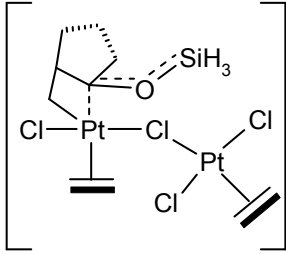 |  |          |           |           |           |
| <b><u>Cartesian co-ordinate</u></b> |                                                                                   | <b><u>Frequencies</u></b>                                                          |          |           |           |           |
| -----<br>Atoms                      | X                                                                                 | Y                                                                                  | Z        |           |           |           |
| -----                               |                                                                                   |                                                                                    |          |           |           |           |
| C                                   | -2.14424                                                                          | -3.02796                                                                           | -0.24545 | -113.1162 | 20.0044   | 46.3181   |
| C                                   | -1.61501                                                                          | -2.61837                                                                           | 0.92678  | 53.6723   | 60.5327   | 68.6741   |
| Pt                                  | -1.84050                                                                          | -0.57054                                                                           | -0.52996 | 82.5869   | 87.6415   | 100.8556  |
| Cl                                  | -4.08078                                                                          | -0.30432                                                                           | 0.08670  | 112.9892  | 122.4948  | 123.1078  |
| Cl                                  | 0.36071                                                                           | -1.01643                                                                           | -1.45597 | 138.7987  | 147.5783  | 152.7436  |
| H                                   | -0.53890                                                                          | -2.62406                                                                           | 1.09028  | 155.2783  | 168.2425  | 171.5311  |
| H                                   | -2.26270                                                                          | -2.35068                                                                           | 1.75730  | 178.7295  | 197.0212  | 198.3566  |
| H                                   | -3.21906                                                                          | -3.09251                                                                           | -0.38546 | 218.0318  | 226.5654  | 250.5659  |
| H                                   | -1.50491                                                                          | -3.37819                                                                           | -1.05127 | 274.2120  | 284.0943  | 303.3333  |
| Pt                                  | 2.29669                                                                           | -0.08070                                                                           | -0.21636 | 310.1702  | 313.5438  | 325.2929  |
| Cl                                  | 2.43934                                                                           | 1.69991                                                                            | -1.74505 | 326.0334  | 336.6574  | 408.9895  |
| Cl                                  | 2.10921                                                                           | -1.82693                                                                           | 1.37783  | 416.7063  | 468.8412  | 483.0933  |
| H                                   | 4.81907                                                                           | 0.47619                                                                            | -0.76761 | 518.2288  | 542.8788  | 595.2635  |
| C                                   | 4.37819                                                                           | 0.06821                                                                            | 0.13624  | 667.6605  | 705.8103  | 727.2464  |
| C                                   | 3.69773                                                                           | 0.90966                                                                            | 1.02843  | 762.0986  | 780.0867  | 799.4047  |
| H                                   | 4.71529                                                                           | -0.91088                                                                           | 0.46186  | 836.2721  | 839.8417  | 849.9066  |
| H                                   | 3.52802                                                                           | 0.58011                                                                            | 2.04849  | 859.1786  | 871.5029  | 922.0159  |
| H                                   | 3.62295                                                                           | 1.97224                                                                            | 0.82119  | 934.8236  | 960.6186  | 973.6467  |
| C                                   | -1.02848                                                                          | 2.17119                                                                            | -0.43223 | 996.3303  | 1014.1781 | 1019.5787 |
| O                                   | -0.06590                                                                          | 0.92828                                                                            | 1.43705  | 1034.5039 | 1040.2850 | 1050.8505 |
| C                                   | -1.12061                                                                          | 1.43204                                                                            | 0.87556  | 1059.0875 | 1063.5415 | 1079.8824 |
| C                                   | -1.76296                                                                          | 1.23935                                                                            | -1.42134 | 1088.4198 | 1099.5923 | 1168.3262 |
| H                                   | -2.78014                                                                          | 1.57932                                                                            | -1.62104 | 1176.6989 | 1208.9592 | 1230.9637 |
| H                                   | -1.19478                                                                          | 1.12354                                                                            | -2.34551 | 1239.4538 | 1246.7705 | 1269.0656 |
| C                                   | -2.30626                                                                          | 1.91851                                                                            | 1.67800  | 1283.4537 | 1301.1239 | 1309.6969 |
| H                                   | -2.95677                                                                          | 1.11595                                                                            | 2.03105  | 1321.8541 | 1346.9238 | 1360.5740 |
| C                                   | -2.98296                                                                          | 2.94459                                                                            | 0.75839  | 1373.5245 | 1445.0219 | 1464.6492 |
| H                                   | -3.75398                                                                          | 2.44546                                                                            | 0.16774  | 1468.4688 | 1471.3651 | 1499.0045 |
| H                                   | -3.45559                                                                          | 3.74594                                                                            | 1.32868  | 1524.1970 | 1543.2769 | 1569.5161 |
| C                                   | -1.83538                                                                          | 3.44616                                                                            | -0.13841 | 1666.8788 | 2271.0128 | 2359.0601 |
| H                                   | -2.18586                                                                          | 3.91185                                                                            | -1.06248 | 2383.0934 | 3062.9618 | 3079.8166 |
| H                                   | -1.21776                                                                          | 4.17456                                                                            | 0.39920  | 3111.1406 | 3124.2149 | 3139.1250 |
| H                                   | -1.86667                                                                          | 2.42078                                                                            | 2.55067  | 3151.7148 | 3153.6784 | 3157.0447 |
|                                     |                                                                                   |                                                                                    |          | 3173.5862 | 3174.2152 | 3177.3893 |
|                                     |                                                                                   |                                                                                    |          | 3181.2864 | 3191.6652 | 3255.2613 |
|                                     |                                                                                   |                                                                                    |          | 3272.6183 | 3277.3828 | 3289.0405 |

|    |          |          |          |
|----|----------|----------|----------|
| H  | 0.01510  | 2.31918  | -0.72397 |
| H  | -0.72364 | 1.09626  | 3.91301  |
| H  | -0.47075 | -1.12647 | 2.99546  |
| H  | 1.50159  | 0.34979  | 3.34593  |
| Si | 0.07926  | 0.23238  | 3.02050  |

**Statistical Thermodynamic Analysis**

|                                      |                                               |
|--------------------------------------|-----------------------------------------------|
| Temperature=298.15 K                 | Pressure=1 atm                                |
| Zero-point correction= 0.285913      | Electronic Energy = -2836.36815795            |
| Internal Energy (E)= -2836.05723695  | Enthalpy (H)= -2836.05629295                  |
| Gibbs Free Energy (G)=-2836.13925495 | Gibbs Free Energy of Solvation=-2836.19615919 |

| St.Pt.                              | General Structure                                                                 | Ball & Stick model                                                                 |          |           |           |           |
|-------------------------------------|-----------------------------------------------------------------------------------|------------------------------------------------------------------------------------|----------|-----------|-----------|-----------|
| 2DI <sub>3</sub>                    | 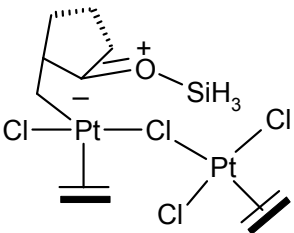 |  |          |           |           |           |
| <b><u>Cartesian co-ordinate</u></b> |                                                                                   | <b><u>Frequencies</u></b>                                                          |          |           |           |           |
| Atoms                               | X                                                                                 | Y                                                                                  | Z        |           |           |           |
| C                                   | -2.02978                                                                          | -3.22254                                                                           | -0.03639 | 43.4535   | 49.7138   | 55.6665   |
| C                                   | -1.42281                                                                          | -2.79599                                                                           | 1.09899  | 69.4058   | 73.7769   | 86.2845   |
| Pt                                  | -1.32485                                                                          | -0.99625                                                                           | -0.52014 | 92.9828   | 93.3983   | 98.3406   |
| Cl                                  | -3.33528                                                                          | -0.05477                                                                           | 0.34294  | 108.6983  | 114.5424  | 124.4540  |
| Cl                                  | 0.82712                                                                           | -1.81184                                                                           | -1.25670 | 134.5568  | 149.4855  | 156.0858  |
| H                                   | -0.37018                                                                          | -2.97652                                                                           | 1.29148  | 160.6371  | 177.7184  | 181.2431  |
| H                                   | -2.00818                                                                          | -2.35121                                                                           | 1.89786  | 183.8584  | 199.2490  | 207.3067  |
| H                                   | -3.10388                                                                          | -3.13066                                                                           | -0.16702 | 212.3194  | 233.3037  | 242.0831  |
| H                                   | -1.48109                                                                          | -3.78048                                                                           | -0.78928 | 261.4999  | 264.3750  | 281.0096  |
| Pt                                  | 2.01602                                                                           | -0.05328                                                                           | 0.03291  | 291.4358  | 304.8926  | 324.5070  |
| Cl                                  | 2.59584                                                                           | 1.00582                                                                            | -1.98557 | 333.4558  | 357.6585  | 396.7551  |
| Cl                                  | 1.39371                                                                           | -0.99642                                                                           | 2.12484  | 411.1038  | 502.7945  | 524.3260  |
| H                                   | 4.43374                                                                           | 1.00453                                                                            | 0.20381  | 533.2251  | 538.2497  | 595.8672  |
| C                                   | 3.68493                                                                           | 0.84541                                                                            | 0.97290  | 662.7529  | 684.9745  | 735.1896  |
| C                                   | 2.58302                                                                           | 1.70751                                                                            | 1.06936  | 749.2067  | 792.8566  | 807.8076  |
| H                                   | 3.95117                                                                           | 0.21061                                                                            | 1.81177  | 814.5289  | 836.0680  | 856.8954  |
| H                                   | 2.00763                                                                           | 1.74491                                                                            | 1.98866  | 864.6966  | 891.3021  | 919.1263  |
| H                                   | 2.49509                                                                           | 2.54309                                                                            | 0.38183  | 952.5890  | 957.3736  | 959.1000  |
| C                                   | -0.74062                                                                          | 2.04218                                                                            | -0.97551 | 976.6017  | 990.8712  | 1022.4239 |
| O                                   | -0.70270                                                                          | 1.52007                                                                            | 1.35169  | 1022.6459 | 1029.1692 | 1040.0993 |
| C                                   | -1.27467                                                                          | 2.12377                                                                            | 0.40105  | 1061.5883 | 1064.9200 | 1074.2687 |
| C                                   | -1.12026                                                                          | 0.67919                                                                            | -1.65058 | 1087.2644 | 1113.3041 | 1168.2125 |
| H                                   | -2.09069                                                                          | 0.81122                                                                            | -2.14025 | 1200.9512 | 1219.8640 | 1234.5134 |
| H                                   | -0.35172                                                                          | 0.50779                                                                            | -2.40993 | 1238.1151 | 1241.6164 | 1269.5203 |
| C                                   | -2.41697                                                                          | 3.08023                                                                            | 0.51572  | 1274.9345 | 1285.5669 | 1316.7976 |
| H                                   | -3.22516                                                                          | 2.70278                                                                            | 1.14236  | 1323.9853 | 1361.2373 | 1365.1221 |
| C                                   | -2.76881                                                                          | 3.36426                                                                            | -0.95091 | 1366.5832 | 1423.9126 | 1470.5432 |
| H                                   | -3.46017                                                                          | 2.59094                                                                            | -1.29853 | 1473.7805 | 1476.3275 | 1504.3750 |
| H                                   | -3.24148                                                                          | 4.33798                                                                            | -1.08461 | 1517.7464 | 1573.8363 | 1652.7840 |
| C                                   | -1.41396                                                                          | 3.24116                                                                            | -1.67130 | 1673.5701 | 2287.7948 | 2327.8154 |
| H                                   | -1.51192                                                                          | 3.07579                                                                            | -2.74553 | 2399.4680 | 3029.8094 | 3080.5039 |
| H                                   | -0.82328                                                                          | 4.15212                                                                            | -1.52135 | 3087.7897 | 3111.1935 | 3114.8686 |
| H                                   | -1.99185                                                                          | 3.97639                                                                            | 0.99773  | 3159.9403 | 3162.8636 | 3174.4360 |
| H                                   | 0.35369                                                                           | 2.08374                                                                            | -0.94120 | 3175.4204 | 3176.6074 | 3181.1004 |
|                                     |                                                                                   |                                                                                    |          | 3189.2970 | 3191.9172 | 3269.3536 |
|                                     |                                                                                   |                                                                                    |          | 3275.5095 | 3296.3000 | 3297.1150 |



|    |          |          |         |
|----|----------|----------|---------|
| H  | -2.45516 | 1.83721  | 3.21447 |
| H  | -1.49185 | -0.40453 | 2.91123 |
| H  | -0.13027 | 1.45485  | 3.80102 |
| Si | -1.24702 | 1.03525  | 2.94090 |

**Statistical Thermodynamic Analysis**

Temperature=298.15 K

Pressure=1 atm

Zero-point correction= 0.286503

Electronic Energy = -2836.38047637

Internal Energy (E)= -2836.06831937

Enthalpy (H)= -2836.06737437

Gibbs Free Energy (G)=-2836.15087637

Gibbs Free Energy of Solvation=-2836.21089468

| St.Pt.                              | General Structure                                                                 | Ball & Stick model                                                                 |          |           |           |           |
|-------------------------------------|-----------------------------------------------------------------------------------|------------------------------------------------------------------------------------|----------|-----------|-----------|-----------|
| 2DTS <sub>3</sub>                   | 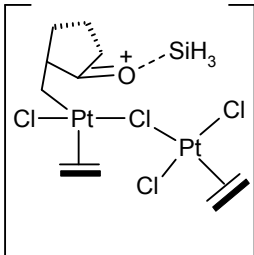 |  |          |           |           |           |
| <b><u>Cartesian co-ordinate</u></b> |                                                                                   | <b><u>Frequencies</u></b>                                                          |          |           |           |           |
| -----<br>Atoms                      | X                                                                                 | Y                                                                                  | Z        | -----     | -----     | -----     |
| -----                               | -----                                                                             | -----                                                                              | -----    | -----     | -----     | -----     |
| C                                   | -1.52296                                                                          | -3.41715                                                                           | -0.48161 | -111.9992 | 16.5363   | 41.8634   |
| C                                   | -0.97219                                                                          | -3.10219                                                                           | 0.71505  | 42.4612   | 58.1323   | 63.9456   |
| Pt                                  | -1.23637                                                                          | -1.02547                                                                           | -0.57271 | 78.5480   | 83.8386   | 90.0723   |
| Cl                                  | -3.31824                                                                          | -0.57681                                                                           | 0.48832  | 99.3340   | 109.6340  | 115.3903  |
| Cl                                  | 0.91984                                                                           | -1.36930                                                                           | -1.60446 | 123.0488  | 130.2370  | 142.8339  |
| H                                   | 0.10292                                                                           | -3.11183                                                                           | 0.87483  | 154.2304  | 156.5208  | 169.3889  |
| H                                   | -1.61015                                                                          | -2.92415                                                                           | 1.57593  | 174.7296  | 190.8869  | 199.2413  |
| H                                   | -2.59937                                                                          | -3.50046                                                                           | -0.59882 | 209.1259  | 227.8804  | 243.0751  |
| H                                   | -0.90371                                                                          | -3.71304                                                                           | -1.32302 | 244.5660  | 260.6192  | 287.9111  |
| Pt                                  | 2.08721                                                                           | 0.15918                                                                            | -0.04242 | 297.3076  | 312.0653  | 313.3893  |
| Cl                                  | 2.07341                                                                           | 1.86209                                                                            | -1.67960 | 317.0989  | 337.1874  | 409.1444  |
| Cl                                  | 2.14947                                                                           | -1.49568                                                                           | 1.64603  | 416.8553  | 430.4969  | 514.0496  |
| H                                   | 4.26805                                                                           | 1.65028                                                                            | 0.09861  | 520.8019  | 527.8883  | 601.0436  |
| C                                   | 3.74602                                                                           | 1.10466                                                                            | 0.87794  | 655.6164  | 685.2621  | 716.2230  |
| C                                   | 2.56165                                                                           | 1.61981                                                                            | 1.42314  | 740.4809  | 793.8510  | 813.2650  |
| H                                   | 4.29385                                                                           | 0.33060                                                                            | 1.40550  | 822.6171  | 836.4814  | 854.1968  |
| H                                   | 2.20925                                                                           | 1.25365                                                                            | 2.38210  | 864.2249  | 899.9435  | 916.8218  |
| H                                   | 2.18166                                                                           | 2.57455                                                                            | 1.07357  | 947.6096  | 962.4844  | 962.9103  |
| C                                   | -1.19274                                                                          | 2.06621                                                                            | -0.47657 | 980.9304  | 989.1544  | 1025.6740 |
| O                                   | -1.45311                                                                          | 1.53394                                                                            | 1.87612  | 1026.9202 | 1032.3735 | 1033.6501 |
| C                                   | -1.92778                                                                          | 2.00061                                                                            | 0.80634  | 1061.3090 | 1070.8681 | 1075.6503 |
| C                                   | -1.36485                                                                          | 0.81233                                                                            | -1.38737 | 1085.8844 | 1116.6979 | 1180.7172 |
| H                                   | -2.35368                                                                          | 0.85967                                                                            | -1.85566 | 1193.4442 | 1218.8585 | 1236.1662 |
| H                                   | -0.59357                                                                          | 0.92172                                                                            | -2.15522 | 1238.5048 | 1239.8964 | 1270.4307 |
| C                                   | -3.18427                                                                          | 2.80684                                                                            | 0.79126  | 1284.8564 | 1290.6255 | 1311.4311 |
| H                                   | -4.01580                                                                          | 2.24399                                                                            | 1.22134  | 1330.3389 | 1355.8428 | 1360.0480 |
| C                                   | -3.31098                                                                          | 3.23471                                                                            | -0.67586 | 1363.7087 | 1428.9862 | 1471.1563 |
| H                                   | -3.85875                                                                          | 2.46788                                                                            | -1.23054 | 1471.7374 | 1472.9727 | 1504.7207 |
| H                                   | -3.83901                                                                          | 4.18180                                                                            | -0.79212 | 1516.1450 | 1574.7971 | 1658.2025 |
| C                                   | -1.84536                                                                          | 3.29850                                                                            | -1.14560 | 1690.7997 | 2295.9119 | 2340.0775 |
| H                                   | -1.73417                                                                          | 3.25912                                                                            | -2.23063 | 2403.3183 | 3054.6874 | 3085.0783 |
| H                                   | -1.37471                                                                          | 4.22184                                                                            | -0.78976 | 3086.7931 | 3108.4780 | 3111.2420 |
| H                                   | -2.98759                                                                          | 3.66962                                                                            | 1.44584  | 3156.8601 | 3161.6970 | 3162.8488 |
| H                                   | -0.12268                                                                          | 2.17155                                                                            | -0.26819 | 3166.1286 | 3170.5999 | 3185.4015 |
|                                     |                                                                                   |                                                                                    |          | 3189.6293 | 3195.2982 | 3263.1838 |
|                                     |                                                                                   |                                                                                    |          | 3285.3271 | 3287.0778 | 3303.2755 |

|    |          |          |         |
|----|----------|----------|---------|
| H  | -2.37644 | -0.05140 | 3.66235 |
| H  | -0.57059 | -0.89794 | 2.19258 |
| H  | -0.13127 | 0.86145  | 3.83996 |
| Si | -1.11857 | 0.22418  | 2.95054 |

**Statistical Thermodynamic Analysis**

|                                      |                                               |
|--------------------------------------|-----------------------------------------------|
| Temperature=298.15 K                 | Pressure=1 atm                                |
| Zero-point correction= 0.285591      | Electronic Energy = -2836.37107538            |
| Internal Energy (E)= -2836.06001838  | Enthalpy (H)= -2836.05907338                  |
| Gibbs Free Energy (G)=-2836.14388438 | Gibbs Free Energy of Solvation=-2836.20279866 |

| St.Pt.                              | General Structure | Ball & Stick model        |          |           |           |           |
|-------------------------------------|-------------------|---------------------------|----------|-----------|-----------|-----------|
| 2D1 <sub>4</sub>                    |                   |                           |          |           |           |           |
| <b><u>Cartesian co-ordinate</u></b> |                   | <b><u>Frequencies</u></b> |          |           |           |           |
| -----<br>Atoms                      | X                 | Y                         | Z        | 45.6999   | 57.6969   | 61.0622   |
| -----                               |                   |                           |          | 69.0866   | 82.7116   | 89.3426   |
| C                                   | -1.54831          | -3.40778                  | -0.47402 | 94.4296   | 103.9443  | 108.8858  |
| C                                   | -1.03283          | -3.08106                  | 0.74161  | 118.5214  | 122.4062  | 129.0263  |
| Pt                                  | -1.37180          | -1.00084                  | -0.50197 | 136.1196  | 152.4074  | 152.7727  |
| Cl                                  | -3.54261          | -0.67466                  | 0.44848  | 158.0919  | 172.1792  | 179.5968  |
| Cl                                  | 0.82478           | -1.30607                  | -1.57307 | 183.2535  | 190.9492  | 206.4568  |
| H                                   | 0.03979           | -3.03720                  | 0.91858  | 228.1112  | 229.7455  | 242.5948  |
| H                                   | -1.69320          | -2.96240                  | 1.59646  | 250.2956  | 257.5753  | 277.7153  |
| H                                   | -2.61691          | -3.55053                  | -0.60792 | 282.0231  | 298.1143  | 308.6021  |
| H                                   | -0.89890          | -3.65541                  | -1.30896 | 323.8873  | 346.8550  | 362.0849  |
| Pt                                  | 2.20483           | 0.13167                   | -0.09732 | 373.4345  | 489.2393  | 518.4790  |
| Cl                                  | 2.07972           | 1.89243                   | -1.69870 | 533.6288  | 538.8635  | 605.1895  |
| Cl                                  | 2.13023           | -1.49507                  | 1.69517  | 675.0640  | 687.4034  | 698.5505  |
| H                                   | 4.58101           | 1.33092                   | -0.27159 | 761.0788  | 774.9620  | 790.0592  |
| C                                   | 4.11124           | 0.85966                   | 0.58631  | 812.0110  | 835.4342  | 844.9008  |
| C                                   | 3.09601           | 1.53365                   | 1.29093  | 847.4254  | 895.3074  | 899.4647  |
| H                                   | 4.61822           | 0.01510                   | 1.04352  | 918.4991  | 933.9653  | 951.7181  |
| H                                   | 2.84126           | 1.21089                   | 2.29563  | 970.6714  | 987.0119  | 1011.3821 |
| H                                   | 2.79426           | 2.52923                   | 0.98098  | 1025.7459 | 1028.4759 | 1034.4418 |
| C                                   | -1.32430          | 2.08832                   | -0.22344 | 1057.8843 | 1058.5560 | 1068.0738 |
| O                                   | -1.89814          | 1.39777                   | 2.09541  | 1074.9735 | 1104.6753 | 1174.7223 |
| C                                   | -2.19503          | 1.96079                   | 0.98857  | 1181.2690 | 1219.9171 | 1232.4198 |
| C                                   | -1.50946          | 0.89253                   | -1.22597 | 1237.5393 | 1239.0098 | 1266.9276 |
| H                                   | -2.49916          | 0.97237                   | -1.68943 | 1268.5234 | 1278.9219 | 1298.8041 |
| H                                   | -0.72796          | 1.03544                   | -1.98247 | 1313.0075 | 1343.0940 | 1347.0662 |
| C                                   | -3.48012          | 2.72604                   | 0.84164  | 1355.0841 | 1428.5056 | 1463.0286 |
| H                                   | -4.32323          | 2.05773                   | 1.03858  | 1470.0708 | 1471.3393 | 1500.6653 |
| C                                   | -3.41145          | 3.30500                   | -0.59237 | 1516.9488 | 1561.6700 | 1605.6496 |
| H                                   | -3.88730          | 2.61048                   | -1.28916 | 1643.8437 | 2288.9832 | 2339.1456 |
| H                                   | -3.90285          | 4.27567                   | -0.66825 | 2398.3491 | 3064.2355 | 3075.3352 |
| C                                   | -1.88435          | 3.38605                   | -0.87770 | 3082.6619 | 3116.5290 | 3123.5091 |
| H                                   | -1.64567          | 3.41092                   | -1.94243 | 3150.5490 | 3150.9641 | 3157.3554 |
| H                                   | -1.45581          | 4.27075                   | -0.39388 | 3168.8014 | 3173.3093 | 3177.0722 |
| H                                   | -3.47807          | 3.52081                   | 1.60174  | 3178.9717 | 3179.6977 | 3255.5653 |
| H                                   | -0.26106          | 2.15264                   | 0.03198  | 3274.0389 | 3277.4433 | 3289.9292 |

|                                                  |          |                                               |         |  |
|--------------------------------------------------|----------|-----------------------------------------------|---------|--|
| H                                                | -0.95900 | -1.01487                                      | 2.39948 |  |
| H                                                | 0.53322  | 0.88335                                       | 1.62359 |  |
| H                                                | -0.26525 | 0.77203                                       | 3.93824 |  |
| Si                                               | -0.49136 | 0.36594                                       | 2.53654 |  |
| <b><u>Statistical Thermodynamic Analysis</u></b> |          |                                               |         |  |
| Temperature=298.15 K                             |          | Pressure=1 atm                                |         |  |
| Zero-point correction= 0.285157                  |          | Electronic Energy = -2836.37628080            |         |  |
| Internal Energy (E)= -2836.0653758               |          | Enthalpy (H)= -2836.0644318                   |         |  |
| Gibbs Free Energy (G)=-2836.1476888              |          | Gibbs Free Energy of Solvation=-2836.20388407 |         |  |

| St.Pt.                              | General Structure                                                                 | Ball & Stick model                                                                 |          |           |           |           |
|-------------------------------------|-----------------------------------------------------------------------------------|------------------------------------------------------------------------------------|----------|-----------|-----------|-----------|
| 2DTS <sub>4</sub>                   | 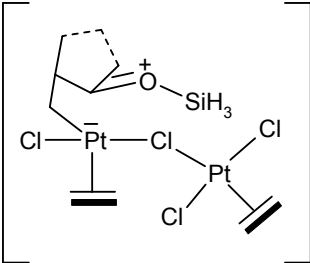 |  |          |           |           |           |
| <b><u>Cartesian co-ordinate</u></b> |                                                                                   | <b><u>Frequencies</u></b>                                                          |          |           |           |           |
| -----<br>Atoms                      | X                                                                                 | Y                                                                                  | Z        |           |           |           |
| -----                               |                                                                                   |                                                                                    |          |           |           |           |
| C                                   | 0.43698                                                                           | -3.27302                                                                           | -0.13234 | -90.2053  | 20.9641   | 31.7653   |
| C                                   | 0.60253                                                                           | -2.63730                                                                           | 1.05195  | 45.7450   | 58.2475   | 66.0335   |
| Pt                                  | -1.08347                                                                          | -1.40165                                                                           | -0.27073 | 74.2763   | 77.3823   | 84.0309   |
| Cl                                  | -2.65733                                                                          | -2.28982                                                                           | 1.22594  | 93.7786   | 105.5237  | 115.4722  |
| Cl                                  | 0.48489                                                                           | -0.30962                                                                           | -1.82676 | 123.2930  | 131.4841  | 132.9868  |
| H                                   | 1.43483                                                                           | -1.95254                                                                           | 1.19027  | 149.9784  | 154.6997  | 166.1906  |
| H                                   | -0.00782                                                                          | -2.88901                                                                           | 1.91334  | 168.1916  | 170.8402  | 188.0509  |
| H                                   | -0.29800                                                                          | -4.06443                                                                           | -0.24571 | 201.1541  | 206.9436  | 233.3904  |
| H                                   | 1.12357                                                                           | -3.08896                                                                           | -0.95447 | 237.1866  | 246.8223  | 249.9751  |
| Pt                                  | 2.04474                                                                           | 0.59951                                                                            | -0.14652 | 272.3788  | 286.4704  | 318.8422  |
| Cl                                  | 3.48574                                                                           | -1.18626                                                                           | -0.58401 | 329.7021  | 336.7222  | 386.8473  |
| Cl                                  | 0.62198                                                                           | 2.46731                                                                            | 0.37574  | 403.6292  | 464.3533  | 515.8186  |
| H                                   | 3.47346                                                                           | -0.02443                                                                           | 2.00670  | 519.1360  | 528.8058  | 617.3688  |
| C                                   | 3.05300                                                                           | 0.92779                                                                            | 1.69895  | 635.6743  | 670.6853  | 708.7608  |
| C                                   | 3.67713                                                                           | 1.67460                                                                            | 0.69255  | 712.7278  | 775.1768  | 784.0538  |
| H                                   | 2.34771                                                                           | 1.40805                                                                            | 2.37036  | 800.5156  | 816.1386  | 825.0992  |
| H                                   | 3.45165                                                                           | 2.73006                                                                            | 0.57886  | 844.7647  | 915.5844  | 929.9133  |
| H                                   | 4.57671                                                                           | 1.29752                                                                            | 0.21689  | 938.6136  | 955.0199  | 971.5171  |
| C                                   | -2.32885                                                                          | 1.27057                                                                            | -0.98420 | 985.7441  | 1010.9941 | 1022.2906 |
| O                                   | -2.23991                                                                          | 1.45719                                                                            | 1.47013  | 1024.4373 | 1032.8750 | 1057.5526 |
| C                                   | -2.49578                                                                          | 1.91965                                                                            | 0.33434  | 1070.7217 | 1073.0858 | 1077.2703 |
| C                                   | -2.54111                                                                          | -0.24361                                                                           | -1.04902 | 1098.4097 | 1112.9602 | 1204.1523 |
| H                                   | -3.50839                                                                          | -0.50623                                                                           | -0.61025 | 1214.3790 | 1215.1819 | 1226.2304 |
| H                                   | -2.56944                                                                          | -0.50899                                                                           | -2.11272 | 1245.3317 | 1250.5613 | 1261.9483 |
| C                                   | -3.03456                                                                          | 3.30206                                                                            | 0.20745  | 1280.9726 | 1287.4241 | 1309.4151 |
| H                                   | -3.61183                                                                          | 3.59486                                                                            | 1.08638  | 1329.1091 | 1352.6905 | 1362.0185 |
| C                                   | -3.77140                                                                          | 3.32129                                                                            | -1.13774 | 1382.2234 | 1441.0112 | 1460.4298 |
| H                                   | -4.84507                                                                          | 3.21443                                                                            | -0.96858 | 1463.8423 | 1477.1243 | 1506.4403 |
| H                                   | -3.61877                                                                          | 4.26413                                                                            | -1.66346 | 1530.6227 | 1569.2415 | 1653.0451 |
| C                                   | -3.22590                                                                          | 2.10544                                                                            | -1.93573 | 1718.4140 | 2289.2233 | 2364.6169 |
| H                                   | -4.04772                                                                          | 1.48175                                                                            | -2.29588 | 2388.6304 | 3011.7599 | 3046.4318 |
| H                                   | -2.65115                                                                          | 2.41812                                                                            | -2.80881 | 3075.7788 | 3107.1000 | 3114.7999 |
| H                                   | -2.12549                                                                          | 3.92553                                                                            | 0.19082  | 3139.6594 | 3156.2702 | 3167.2754 |
| H                                   | -1.26732                                                                          | 1.48620                                                                            | -1.20596 | 3172.4696 | 3174.0316 | 3176.7383 |
| H                                   | -0.66537                                                                          | 1.77323                                                                            | 3.36751  | 3179.2251 | 3180.3163 | 3269.0173 |
| H                                   | -2.19149                                                                          | -0.11852                                                                           | 3.41106  | 3271.8626 | 3286.6281 | 3288.0770 |

|    |          |          |         |
|----|----------|----------|---------|
| H  | -0.16114 | -0.17045 | 1.99346 |
| Si | -1.21652 | 0.63195  | 2.61447 |

**Statistical Thermodynamic Analysis**

Temperature=298.15 K

Pressure=1 atm

Zero-point correction= 0.284695

Electronic Energy = -2836.36849583

Internal Energy (E)= -2836.05796083

Enthalpy (H)= -2836.05701683

Gibbs Free Energy (G)=-2836.14290583

Gibbs Free Energy of Solvation=-2836.20159351

| St.Pt.                              | General Structure | Ball & Stick model        |          |           |           |           |
|-------------------------------------|-------------------|---------------------------|----------|-----------|-----------|-----------|
| 2D1 <sub>5</sub>                    |                   |                           |          |           |           |           |
| <b><u>Cartesian co-ordinate</u></b> |                   | <b><u>Frequencies</u></b> |          |           |           |           |
| -----<br>Atoms                      | X                 | Y                         | Z        |           |           |           |
| -----                               |                   |                           |          |           |           |           |
| C                                   | -0.69396          | -3.30800                  | -0.41793 | 20.9540   | 35.2405   | 40.2650   |
| C                                   | -0.35003          | -2.85558                  | 0.81666  | 56.9345   | 58.5630   | 70.6547   |
| Pt                                  | -1.57383          | -1.10492                  | -0.26478 | 75.5534   | 82.7571   | 99.0688   |
| Cl                                  | -3.45267          | -1.86391                  | 0.90642  | 102.2545  | 113.2162  | 121.5959  |
| Cl                                  | 0.31229           | -0.36259                  | -1.68707 | 129.5520  | 143.3997  | 158.4854  |
| H                                   | 0.64167           | -2.44681                  | 0.98985  | 166.2681  | 174.7544  | 179.0247  |
| H                                   | -0.99414          | -3.03356                  | 1.67226  | 182.6519  | 190.0001  | 205.2327  |
| H                                   | -1.61634          | -3.85932                  | -0.57394 | 209.1658  | 214.0709  | 222.8606  |
| H                                   | 0.01356           | -3.24653                  | -1.24002 | 234.0514  | 237.6664  | 256.4627  |
| Pt                                  | 2.16195           | 0.08194                   | -0.11740 | 289.6844  | 297.1861  | 322.3363  |
| Cl                                  | 2.91612           | -2.10970                  | -0.42480 | 335.0602  | 365.5459  | 380.6654  |
| Cl                                  | 1.46517           | 2.35188                   | 0.22725  | 400.9596  | 479.6275  | 512.7383  |
| H                                   | 3.40165           | -0.80333                  | 2.05976  | 552.1464  | 566.9928  | 597.2834  |
| C                                   | 3.30804           | 0.20580                   | 1.67143  | 622.8078  | 674.8161  | 679.7211  |
| C                                   | 4.09662           | 0.61488                   | 0.58944  | 697.2308  | 749.8285  | 775.9644  |
| H                                   | 2.83418           | 0.94854                   | 2.30568  | 814.2525  | 830.9561  | 838.8379  |
| H                                   | 4.22772           | 1.67180                   | 0.38077  | 865.7380  | 903.4965  | 913.0769  |
| H                                   | 4.79611           | -0.07938                  | 0.13528  | 942.6931  | 952.7369  | 955.3480  |
| C                                   | -1.83673          | 1.90345                   | -0.78441 | 986.4176  | 1015.2498 | 1021.4996 |
| O                                   | -1.44064          | 2.23646                   | 1.63398  | 1030.6389 | 1032.3327 | 1047.1226 |
| C                                   | -1.56154          | 2.65891                   | 0.45322  | 1070.5446 | 1071.7746 | 1080.4709 |
| C                                   | -2.61454          | 0.59550                   | -0.68767 | 1093.1982 | 1120.3064 | 1165.2302 |
| H                                   | -3.45734          | 0.69686                   | 0.00397  | 1203.8501 | 1210.0812 | 1227.8103 |
| H                                   | -3.04319          | 0.40119                   | -1.67892 | 1234.0588 | 1239.7362 | 1241.8615 |
| C                                   | -1.51028          | 4.12998                   | 0.20723  | 1285.7918 | 1289.0499 | 1316.7568 |
| H                                   | -2.41382          | 4.54016                   | 0.68321  | 1329.0641 | 1353.3034 | 1354.3634 |
| C                                   | -1.58370          | 4.25078                   | -1.31956 | 1391.0655 | 1423.6828 | 1458.8499 |
| H                                   | -2.03770          | 5.18766                   | -1.64428 | 1466.1506 | 1470.7192 | 1504.8800 |
| H                                   | -0.57374          | 4.19072                   | -1.73634 | 1518.6784 | 1573.7467 | 1640.0540 |
| C                                   | -2.38838          | 3.00596                   | -1.71904 | 1686.3396 | 2290.0207 | 2309.4421 |
| H                                   | -3.45918          | 3.14961                   | -1.53024 | 2365.9755 | 2995.9414 | 3051.8966 |
| H                                   | -2.26330          | 2.72372                   | -2.76534 | 3070.3128 | 3079.2227 | 3103.3501 |
| H                                   | -0.64362          | 4.57492                   | 0.70209  | 3126.2855 | 3150.1722 | 3157.7561 |
| H                                   | -0.80592          | 1.70915                   | -1.14078 | 3169.3713 | 3169.7057 | 3175.2750 |
|                                     |                   |                           |          | 3176.4028 | 3185.3543 | 3264.4023 |
|                                     |                   |                           |          | 3273.8182 | 3281.9638 | 3292.6800 |



|                                                  |          |                                               |         |  |
|--------------------------------------------------|----------|-----------------------------------------------|---------|--|
| H                                                | -0.74634 | 1.35488                                       | 3.82635 |  |
| H                                                | -2.42330 | 0.04703                                       | 2.62067 |  |
| H                                                | -0.02316 | 0.04716                                       | 1.91257 |  |
| Si                                               | -1.14646 | 0.76071                                       | 2.53777 |  |
| <b><u>Statistical Thermodynamic Analysis</u></b> |          |                                               |         |  |
| Temperature=298.15 K                             |          | Pressure=1 atm                                |         |  |
| Zero-point correction= 0.284640                  |          | Electronic Energy = -2836.37492095            |         |  |
| Internal Energy (E)= -2836.06403795              |          | Enthalpy (H)= -2836.06309295                  |         |  |
| Gibbs Free Energy (G)=-2836.14974395             |          | Gibbs Free Energy of Solvation=-2836.20916997 |         |  |

| St.Pt.                              | General Structure                                                                 | Ball & Stick model                                                                 |          |           |           |           |
|-------------------------------------|-----------------------------------------------------------------------------------|------------------------------------------------------------------------------------|----------|-----------|-----------|-----------|
| 2DTS <sub>5</sub>                   | 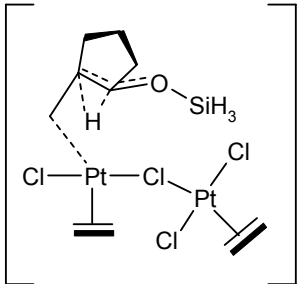 |  |          |           |           |           |
| <b><u>Cartesian co-ordinate</u></b> |                                                                                   | <b><u>Frequencies</u></b>                                                          |          |           |           |           |
| -----<br>Atoms                      | X                                                                                 | Y                                                                                  | Z        |           |           |           |
| -----                               |                                                                                   |                                                                                    |          |           |           |           |
| C                                   | 1.86354                                                                           | -3.04031                                                                           | -0.40017 | -600.2785 | 16.5455   | 32.7465   |
| C                                   | 1.44756                                                                           | -2.25742                                                                           | -1.44728 | 39.3372   | 57.5725   | 68.3260   |
| Pt                                  | 1.86790                                                                           | -0.87825                                                                           | 0.30797  | 79.2782   | 86.0460   | 91.8355   |
| Cl                                  | 4.10268                                                                           | -0.70059                                                                           | -0.34649 | 96.7180   | 102.0642  | 119.1720  |
| Cl                                  | -0.42637                                                                          | -1.21924                                                                           | 1.13344  | 131.0642  | 132.6460  | 138.1102  |
| H                                   | 0.39214                                                                           | -2.10491                                                                           | -1.65320 | 152.7300  | 159.0346  | 164.7263  |
| H                                   | 2.15200                                                                           | -1.91609                                                                           | -2.19914 | 173.2132  | 181.8604  | 197.6529  |
| H                                   | 2.90479                                                                           | -3.33094                                                                           | -0.30686 | 200.3886  | 215.4808  | 235.8009  |
| H                                   | 1.14278                                                                           | -3.53523                                                                           | 0.24353  | 237.2059  | 257.9830  | 278.3824  |
| Pt                                  | -2.20827                                                                          | -0.28666                                                                           | -0.28755 | 279.3627  | 304.0506  | 328.3810  |
| Cl                                  | -3.78034                                                                          | -1.20260                                                                           | 1.17569  | 341.5769  | 372.3938  | 391.4663  |
| Cl                                  | -0.62101                                                                          | 0.71726                                                                            | -1.75975 | 403.6829  | 419.8770  | 512.6629  |
| H                                   | -4.41201                                                                          | -0.95096                                                                           | -1.59799 | 544.2424  | 565.6330  | 626.9986  |
| C                                   | -3.69235                                                                          | -0.16447                                                                           | -1.80125 | 629.7100  | 695.0924  | 709.5695  |
| C                                   | -3.71143                                                                          | 1.01466                                                                            | -1.04465 | 731.0197  | 737.0672  | 778.6871  |
| H                                   | -3.17519                                                                          | -0.18989                                                                           | -2.75533 | 790.6118  | 828.2860  | 840.2154  |
| H                                   | -3.21281                                                                          | 1.90393                                                                            | -1.41798 | 843.4216  | 877.1135  | 927.8648  |
| H                                   | -4.44816                                                                          | 1.14134                                                                            | -0.25797 | 943.8447  | 951.4251  | 973.2717  |
| C                                   | 0.99613                                                                           | 1.75664                                                                            | 1.39659  | 1000.6565 | 1007.5247 | 1019.1177 |
| O                                   | 1.46785                                                                           | 3.12965                                                                            | -0.60459 | 1030.1836 | 1036.3989 | 1039.6721 |
| C                                   | 0.71402                                                                           | 2.72638                                                                            | 0.40879  | 1049.8712 | 1064.7244 | 1073.5863 |
| C                                   | 2.13517                                                                           | 0.84371                                                                            | 1.46627  | 1078.6026 | 1088.1543 | 1145.3112 |
| H                                   | 3.06640                                                                           | 1.31442                                                                            | 1.14843  | 1185.7759 | 1210.6592 | 1227.9922 |
| H                                   | 2.23461                                                                           | 0.46268                                                                            | 2.48653  | 1233.0925 | 1234.4656 | 1247.1339 |
| C                                   | -0.49708                                                                          | 3.55791                                                                            | 0.77461  | 1270.5548 | 1286.9153 | 1316.2828 |
| H                                   | -0.13270                                                                          | 4.50804                                                                            | 1.18123  | 1335.2601 | 1340.5010 | 1351.7457 |
| C                                   | -1.19944                                                                          | 2.69639                                                                            | 1.83342  | 1422.3932 | 1468.3556 | 1468.5122 |
| H                                   | -1.74683                                                                          | 3.28407                                                                            | 2.57037  | 1479.2629 | 1488.9531 | 1504.9718 |
| H                                   | -1.91344                                                                          | 2.02042                                                                            | 1.34776  | 1512.2719 | 1574.1105 | 1598.3011 |
| C                                   | -0.06879                                                                          | 1.86370                                                                            | 2.46274  | 1618.0963 | 2007.0369 | 2285.3624 |
| H                                   | 0.41344                                                                           | 2.40628                                                                            | 3.28721  | 2300.3611 | 2333.2117 | 3072.0292 |
| H                                   | -0.38411                                                                          | 0.88861                                                                            | 2.83660  | 3084.6413 | 3098.6702 | 3104.7309 |
| H                                   | -1.09971                                                                          | 3.77358                                                                            | -0.11006 | 3159.2977 | 3165.5107 | 3174.0958 |
| H                                   | 0.20283                                                                           | 1.56998                                                                            | 0.21577  | 3176.7647 | 3177.3463 | 3180.1830 |
|                                     |                                                                                   |                                                                                    |          | 3182.2048 | 3183.2651 | 3267.9108 |
|                                     |                                                                                   |                                                                                    |          | 3274.6089 | 3285.5248 | 3289.4357 |

|    |         |         |          |
|----|---------|---------|----------|
| H  | 2.86405 | 3.46891 | -2.61743 |
| H  | 3.95151 | 2.39589 | -0.74017 |
| H  | 2.30283 | 1.15722 | -2.08122 |
| Si | 2.72176 | 2.46163 | -1.54855 |

**Statistical Thermodynamic Analysis**

Temperature=298.15 K

Pressure=1 atm

Zero-point correction= 0.282049

Electronic Energy = -2836.3555207

Internal Energy (E)= -2836.04792407

Enthalpy (H)= -2836.04698007

Gibbs Free Energy (G)=-2836.13235007

Gibbs Free Energy of Solvation=-2836.19170293

| St.Pt.                              | General Structure | Ball & Stick model        |          |           |           |           |
|-------------------------------------|-------------------|---------------------------|----------|-----------|-----------|-----------|
| 2DI <sub>6</sub>                    |                   |                           |          |           |           |           |
| <b><u>Cartesian co-ordinate</u></b> |                   | <b><u>Frequencies</u></b> |          |           |           |           |
| -----<br>Atoms                      | X                 | Y                         | Z        |           |           |           |
| -----                               |                   |                           |          |           |           |           |
| C                                   | -0.84288          | -3.23558                  | 0.49534  | 20.6200   | 30.0643   | 44.8951   |
| C                                   | -0.39634          | -2.35643                  | 1.47427  | 55.4207   | 67.7040   | 69.6869   |
| Pt                                  | -1.20196          | -1.21323                  | -0.21828 | 83.5087   | 94.3543   | 96.2216   |
| Cl                                  | -3.30695          | -1.32004                  | 0.77914  | 100.0624  | 114.1416  | 122.9679  |
| Cl                                  | 0.99309           | -1.19273                  | -1.22395 | 133.6198  | 141.3335  | 163.4788  |
| H                                   | 0.65251           | -2.08663                  | 1.54341  | 167.1407  | 168.3817  | 180.1865  |
| H                                   | -1.03039          | -2.09056                  | 2.31385  | 183.7931  | 198.0541  | 204.9951  |
| H                                   | -1.82777          | -3.68497                  | 0.57091  | 207.3359  | 237.0878  | 246.4251  |
| H                                   | -0.14012          | -3.67760                  | -0.20447 | 259.2003  | 287.2489  | 288.6019  |
| Pt                                  | 2.44567           | 0.25701                   | 0.19474  | 303.5735  | 336.8093  | 339.2932  |
| Cl                                  | 4.22666           | -0.25086                  | -1.23074 | 356.7635  | 383.0329  | 410.4240  |
| Cl                                  | 0.64787           | 0.80465                   | 1.66376  | 432.7493  | 454.5912  | 481.1802  |
| H                                   | 4.75192           | 0.33290                   | 1.48975  | 515.1979  | 577.4463  | 595.1605  |
| C                                   | 3.82954           | 0.87284                   | 1.67751  | 721.4598  | 724.7497  | 725.9391  |
| C                                   | 3.48796           | 1.97179                   | 0.87570  | 767.0737  | 777.7337  | 842.3693  |
| H                                   | 3.35077           | 0.73434                   | 2.64165  | 844.0680  | 852.9900  | 868.2395  |
| H                                   | 2.74363           | 2.68268                   | 1.22037  | 877.1973  | 903.0284  | 927.6864  |
| H                                   | 4.14614           | 2.28058                   | 0.07006  | 949.1462  | 953.8890  | 996.9046  |
| C                                   | -1.69532          | 1.14393                   | -1.22314 | 1004.8928 | 1008.9021 | 1019.0244 |
| O                                   | -3.93670          | 1.59675                   | -0.46148 | 1030.1966 | 1038.8336 | 1042.0841 |
| C                                   | -2.58658          | 1.86661                   | -0.22792 | 1070.1539 | 1073.8824 | 1075.4800 |
| C                                   | -2.09830          | 0.04858                   | -1.93490 | 1079.1520 | 1088.8413 | 1166.3181 |
| H                                   | -3.12881          | -0.28364                  | -1.84282 | 1203.6135 | 1230.8091 | 1231.9097 |
| H                                   | -1.50905          | -0.29622                  | -2.78095 | 1237.6383 | 1240.4676 | 1262.8926 |
| C                                   | -2.17986          | 3.33431                   | -0.41970 | 1284.1467 | 1309.3102 | 1316.9282 |
| H                                   | -2.67516          | 3.70861                   | -1.32307 | 1323.6771 | 1337.9601 | 1356.9332 |
| C                                   | -0.66255          | 3.24949                   | -0.61496 | 1408.7943 | 1437.4577 | 1455.3969 |
| H                                   | -0.24105          | 4.14480                   | -1.07534 | 1471.7426 | 1473.1187 | 1501.5635 |
| H                                   | -0.16982          | 3.09313                   | 0.34861  | 1518.6104 | 1575.2258 | 1589.8115 |
| C                                   | -0.47764          | 1.99905                   | -1.49471 | 1641.4531 | 2245.4663 | 2251.8265 |
| H                                   | -0.50285          | 2.26052                   | -2.55949 | 2096.0832 | 3019.9957 | 3082.6446 |
| H                                   | 0.46415           | 1.47416                   | -1.32295 | 3085.7816 | 3106.6795 | 3150.7915 |
| H                                   | -2.48446          | 3.95668                   | 0.42521  | 3155.9379 | 3160.7185 | 3163.2741 |
| H                                   | -2.27852          | 1.54547                   | 0.78326  | 3180.1940 | 3184.2652 | 3189.8653 |
| H                                   | -5.80382          | 2.91959                   | 0.71642  | 3195.2962 | 3265.3244 | 3277.9674 |
| H                                   | -6.04735          | 0.53300                   | 0.50553  | 3286.3624 | 3292.9807 | 3302.3050 |
| H                                   | -4.41674          | 1.48332                   | 2.06599  |           |           |           |

|                                                  |          |                                               |         |  |
|--------------------------------------------------|----------|-----------------------------------------------|---------|--|
| Si                                               | -5.08347 | 1.62259                                       | 0.74979 |  |
| <b><u>Statistical Thermodynamic Analysis</u></b> |          |                                               |         |  |
| Temperature=298.15 K                             |          | Pressure=1 atm                                |         |  |
| Zero-point correction= 0.286790                  |          | Electronic Energy = -2836.39236936            |         |  |
| Internal Energy (E)= -2836.07990236              |          | Enthalpy (H)= -2836.07895836                  |         |  |
| Gibbs Free Energy (G)=-2836.16437536             |          | Gibbs Free Energy of Solvation=-2836.22075825 |         |  |

| St.Pt.                                           | General Structure                                                                 | Ball & Stick model                                                                 |                                               |           |           |           |
|--------------------------------------------------|-----------------------------------------------------------------------------------|------------------------------------------------------------------------------------|-----------------------------------------------|-----------|-----------|-----------|
| 1                                                | 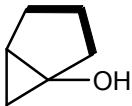 |  |                                               |           |           |           |
| <b><u>Cartesian co-ordinate</u></b>              |                                                                                   | <b><u>Frequencies</u></b>                                                          |                                               |           |           |           |
| -----<br>Atoms                                   | X                                                                                 | Y                                                                                  | Z                                             |           |           |           |
| -----                                            |                                                                                   |                                                                                    |                                               |           |           |           |
| C                                                | -0.02874                                                                          | -1.04625                                                                           | -0.41140                                      | 217.1381  | 260.4429  | 279.5237  |
| O                                                | 1.99353                                                                           | 0.39244                                                                            | -0.53034                                      | 365.2713  | 394.5579  | 464.1024  |
| C                                                | 0.74411                                                                           | 0.15361                                                                            | 0.03190                                       | 546.8045  | 615.7427  | 700.8082  |
| C                                                | 0.57671                                                                           | -1.00247                                                                           | 0.97215                                       | 818.1708  | 837.6690  | 881.5795  |
| H                                                | -0.06760                                                                          | -0.91641                                                                           | 1.84608                                       | 907.0705  | 921.6870  | 946.9379  |
| H                                                | 1.46249                                                                           | -1.61597                                                                           | 1.11507                                       | 974.4526  | 999.2673  | 1017.8852 |
| H                                                | 2.55044                                                                           | 0.78959                                                                            | 0.14776                                       | 1047.2865 | 1085.0363 | 1109.8609 |
| C                                                | -0.21998                                                                          | 1.31359                                                                            | 0.15396                                       | 1156.5982 | 1196.0371 | 1234.5889 |
| H                                                | -0.00451                                                                          | 1.98067                                                                            | 0.99962                                       | 1258.3597 | 1270.3203 | 1309.9180 |
| C                                                | -1.60178                                                                          | 0.65758                                                                            | 0.25215                                       | 1330.3640 | 1341.7480 | 1352.6812 |
| H                                                | -1.83704                                                                          | 0.43149                                                                            | 1.30014                                       | 1413.2496 | 1468.2907 | 1476.5127 |
| H                                                | -2.40501                                                                          | 1.30620                                                                            | -0.11250                                      | 1493.8876 | 1515.8050 | 3031.2374 |
| C                                                | -1.47999                                                                          | -0.64601                                                                           | -0.55430                                      | 3036.0396 | 3054.6162 | 3083.1835 |
| H                                                | -2.18458                                                                          | -1.41405                                                                           | -0.21083                                      | 3087.0744 | 3114.6564 | 3124.6172 |
| H                                                | -1.69662                                                                          | -0.45897                                                                           | -1.61513                                      | 3180.2878 | 3222.6634 | 3881.3009 |
| H                                                | -0.12958                                                                          | 1.90688                                                                            | -0.76685                                      |           |           |           |
| H                                                | 0.42174                                                                           | -1.72921                                                                           | -1.12738                                      |           |           |           |
| <b><u>Statistical Thermodynamic Analysis</u></b> |                                                                                   |                                                                                    |                                               |           |           |           |
| Temperature=298.15 K                             |                                                                                   |                                                                                    | Pressure=1 atm                                |           |           |           |
| Zero-point correction= 0.150417                  |                                                                                   |                                                                                    | Electronic Energy = -309.644879854            |           |           |           |
| Internal Energy (E)= -309.488126854              |                                                                                   |                                                                                    | Enthalpy (H)= -309.487182854                  |           |           |           |
| Gibbs Free Energy (G)=-309.524068854             |                                                                                   |                                                                                    | Gibbs Free Energy of Solvation=-309.527141755 |           |           |           |

| St.Pt.                                           | General Structure                                                                 | Ball & Stick model                                                                 |                                               |           |           |           |
|--------------------------------------------------|-----------------------------------------------------------------------------------|------------------------------------------------------------------------------------|-----------------------------------------------|-----------|-----------|-----------|
| b                                                | 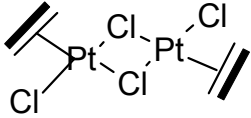 |  |                                               |           |           |           |
| <b><u>Cartesian co-ordinate</u></b>              |                                                                                   | <b><u>Frequencies</u></b>                                                          |                                               |           |           |           |
| -----<br>Atoms                                   | X                                                                                 | Y                                                                                  | Z                                             |           |           |           |
| -----                                            |                                                                                   |                                                                                    |                                               |           |           |           |
| C                                                | -3.16324                                                                          | -1.56406                                                                           | -0.70042                                      | 16.7812   | 57.3971   | 83.4611   |
| C                                                | -3.16341                                                                          | -1.56395                                                                           | 0.70031                                       | 89.4958   | 95.9356   | 112.3590  |
| Pt                                               | -1.77909                                                                          | -0.07918                                                                           | 0.00000                                       | 128.3620  | 128.9969  | 174.9616  |
| Cl                                               | -3.48186                                                                          | 1.49911                                                                            | -0.00047                                      | 175.1650  | 191.4876  | 194.7292  |
| Cl                                               | 0.06173                                                                           | -1.66790                                                                           | 0.00052                                       | 248.3676  | 263.1560  | 283.0715  |
| H                                                | -2.58984                                                                          | -2.30421                                                                           | 1.25636                                       | 284.6913  | 357.7089  | 359.1469  |
| H                                                | -3.94427                                                                          | -1.03846                                                                           | 1.24695                                       | 393.5372  | 394.8806  | 467.2203  |
| H                                                | -3.94399                                                                          | -1.03868                                                                           | -1.24732                                      | 467.2624  | 726.5266  | 726.7192  |
| H                                                | -2.58953                                                                          | -2.30441                                                                           | -1.25620                                      | 826.0055  | 826.0502  | 975.8408  |
| Pt                                               | 1.77909                                                                           | 0.07918                                                                            | 0.00000                                       | 976.2062  | 1029.4951 | 1029.5557 |
| Cl                                               | 3.48186                                                                           | -1.49911                                                                           | -0.00041                                      | 1032.8103 | 1033.0539 | 1200.9967 |
| Cl                                               | -0.06174                                                                          | 1.66790                                                                            | 0.00047                                       | 1201.0421 | 1262.3914 | 1263.2146 |
| H                                                | 3.94427                                                                           | 1.03850                                                                            | 1.24693                                       | 1432.6769 | 1432.7982 | 1531.3010 |
| C                                                | 3.16341                                                                           | 1.56397                                                                            | 0.70027                                       | 1532.4162 | 3142.2375 | 3142.2692 |
| C                                                | 3.16325                                                                           | 1.56404                                                                            | -0.70046                                      | 3144.5248 | 3144.5613 | 3241.1654 |
| H                                                | 2.58984                                                                           | 2.30425                                                                            | 1.25629                                       | 3241.1782 | 3257.0540 | 3257.0609 |
| H                                                | 2.58954                                                                           | 2.30437                                                                            | -1.25626                                      |           |           |           |
| H                                                | 3.94399                                                                           | 1.03864                                                                            | -1.24734                                      |           |           |           |
| <b><u>Statistical Thermodynamic Analysis</u></b> |                                                                                   |                                                                                    |                                               |           |           |           |
| Temperature=298.15 K                             |                                                                                   |                                                                                    | Pressure=1 atm                                |           |           |           |
| Zero-point correction= 0.115224                  |                                                                                   |                                                                                    | Electronic Energy = -2236.15949615            |           |           |           |
| Internal Energy (E)= -2236.02872015              |                                                                                   |                                                                                    | Enthalpy (H)= -2236.02777615                  |           |           |           |
| Gibbs Free Energy (G)=-2236.09111615             |                                                                                   |                                                                                    | Gibbs Free Energy of Solvation=-2236.14255742 |           |           |           |

| St.Pt.                                           | General Structure                                                                 | Ball & Stick model                                                                 |                                              |           |           |           |
|--------------------------------------------------|-----------------------------------------------------------------------------------|------------------------------------------------------------------------------------|----------------------------------------------|-----------|-----------|-----------|
| c                                                | 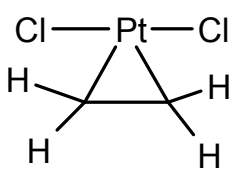 |  |                                              |           |           |           |
| <b><u>Cartesian co-ordinate</u></b>              |                                                                                   | <b><u>Frequencies</u></b>                                                          |                                              |           |           |           |
| -----<br>Atoms                                   | X                                                                                 | Y                                                                                  | Z                                            | 115.8772  | 129.5588  | 136.2589  |
| -----                                            |                                                                                   |                                                                                    |                                              | 150.4350  | 340.4505  | 363.0286  |
| Pt                                               | 0.00002                                                                           | 0.21970                                                                            | 0.00002                                      | 459.6862  | 499.2095  | 780.0821  |
| Cl                                               | -2.32706                                                                          | 0.33871                                                                            | 0.00012                                      | 823.8908  | 939.0218  | 1055.2448 |
| Cl                                               | 2.32709                                                                           | 0.33862                                                                            | -0.00020                                     | 1057.7554 | 1197.3888 | 1219.3178 |
| H                                                | -0.92957                                                                          | -1.91865                                                                           | 1.25376                                      | 1423.1821 | 1502.4458 | 3141.3942 |
| C                                                | -0.00006                                                                          | -1.74806                                                                           | 0.71228                                      | 3141.5787 | 3242.6592 | 3257.8357 |
| C                                                | -0.00017                                                                          | -1.74805                                                                           | -0.71227                                     |           |           |           |
| H                                                | 0.92951                                                                           | -1.91877                                                                           | 1.25361                                      |           |           |           |
| H                                                | 0.92932                                                                           | -1.91876                                                                           | -1.25375                                     |           |           |           |
| H                                                | -0.92977                                                                          | -1.91863                                                                           | -1.25360                                     |           |           |           |
| Pt                                               | 1.77909                                                                           | 0.07918                                                                            | 0.00000                                      |           |           |           |
| Cl                                               | 3.48186                                                                           | -1.49911                                                                           | -0.00041                                     |           |           |           |
| Cl                                               | -0.06174                                                                          | 1.66790                                                                            | 0.00047                                      |           |           |           |
| H                                                | 3.94427                                                                           | 1.03850                                                                            | 1.24693                                      |           |           |           |
| C                                                | 3.16341                                                                           | 1.56397                                                                            | 0.70027                                      |           |           |           |
| C                                                | 3.16325                                                                           | 1.56404                                                                            | -0.70046                                     |           |           |           |
| H                                                | 2.58984                                                                           | 2.30425                                                                            | 1.25629                                      |           |           |           |
| H                                                | 2.58954                                                                           | 2.30437                                                                            | -1.25626                                     |           |           |           |
| H                                                | 3.94399                                                                           | 1.03864                                                                            | -1.24734                                     |           |           |           |
| <b><u>Statistical Thermodynamic Analysis</u></b> |                                                                                   |                                                                                    |                                              |           |           |           |
| Temperature=298.15 K                             |                                                                                   |                                                                                    | Pressure=1 atm                               |           |           |           |
| Zero-point correction= 0.056900                  |                                                                                   |                                                                                    | Electronic Energy = -1118.03818476           |           |           |           |
| Internal Energy (E)= -1117.97425176              |                                                                                   |                                                                                    | Enthalpy (H)= -1117.97330776                 |           |           |           |
| Gibbs Free Energy (G)=-1118.01492176             |                                                                                   |                                                                                    | Gibbs Free Energy of Solvation=-1118.0562792 |           |           |           |



| St.Pt.                                           | General Structure                                                                 | Ball & Stick model                                                                 |                                               |           |           |           |
|--------------------------------------------------|-----------------------------------------------------------------------------------|------------------------------------------------------------------------------------|-----------------------------------------------|-----------|-----------|-----------|
| 1MTS <sub>1</sub>                                | 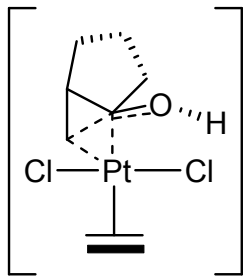 |  |                                               |           |           |           |
| <b><u>Cartesian co-ordinate</u></b>              |                                                                                   | <b><u>Frequencies</u></b>                                                          |                                               |           |           |           |
| -----<br>Atoms                                   | X                                                                                 | Y                                                                                  | Z                                             | -----     | -----     | -----     |
| -----                                            | -----                                                                             | -----                                                                              | -----                                         | -----     | -----     | -----     |
| C                                                | 2.87271                                                                           | -0.21450                                                                           | 0.11753                                       | -194.0986 | 58.7326   | 69.9782   |
| C                                                | 2.27783                                                                           | -0.23895                                                                           | 1.36927                                       | 105.6146  | 123.3557  | 135.4526  |
| Pt                                               | 0.68555                                                                           | -0.05048                                                                           | -0.15529                                      | 161.7855  | 181.9439  | 187.5237  |
| Cl                                               | 0.58373                                                                           | -2.41704                                                                           | -0.25770                                      | 208.2740  | 218.8850  | 281.1056  |
| Cl                                               | 0.93851                                                                           | 2.32607                                                                            | 0.00353                                       | 298.7612  | 318.7451  | 338.0322  |
| H                                                | 2.22602                                                                           | 0.66560                                                                            | 1.97241                                       | 358.1342  | 391.0736  | 411.0886  |
| H                                                | 2.08594                                                                           | -1.18627                                                                           | 1.86917                                       | 440.6192  | 441.4616  | 577.7554  |
| H                                                | 3.15431                                                                           | -1.14124                                                                           | -0.37782                                      | 645.0397  | 681.0713  | 692.8294  |
| H                                                | 3.29022                                                                           | 0.70943                                                                            | -0.27756                                      | 705.7588  | 768.3825  | 821.8720  |
| C                                                | -2.73653                                                                          | 0.06713                                                                            | -0.83852                                      | 830.3688  | 873.8518  | 888.6549  |
| O                                                | -1.97909                                                                          | 2.21165                                                                            | -0.13559                                      | 924.7326  | 948.3089  | 1007.1457 |
| C                                                | -2.09024                                                                          | 0.92731                                                                            | 0.10742                                       | 1014.3815 | 1018.9822 | 1020.6941 |
| C                                                | -1.22501                                                                          | -0.03047                                                                           | -1.28238                                      | 1023.0877 | 1067.1335 | 1105.2470 |
| H                                                | -1.08575                                                                          | -1.07035                                                                           | -1.59273                                      | 1121.6180 | 1178.6001 | 1206.2644 |
| H                                                | -1.05049                                                                          | 0.71377                                                                            | -2.06140                                      | 1206.7564 | 1217.6842 | 1242.2176 |
| H                                                | -1.13222                                                                          | 2.56008                                                                            | 0.23225                                       | 1286.8900 | 1294.6983 | 1324.6594 |
| C                                                | -2.05255                                                                          | 0.30984                                                                            | 1.47547                                       | 1328.1662 | 1345.2221 | 1378.9488 |
| H                                                | -1.11921                                                                          | 0.47272                                                                            | 2.02434                                       | 1419.4454 | 1431.3526 | 1437.3139 |
| C                                                | -2.42763                                                                          | -1.15417                                                                           | 1.23528                                       | 1461.6303 | 1474.8307 | 1550.8544 |
| H                                                | -1.52313                                                                          | -1.75912                                                                           | 1.11262                                       | 1590.3943 | 3018.4374 | 3053.6107 |
| H                                                | -2.99512                                                                          | -1.57486                                                                           | 2.07012                                       | 3077.7030 | 3084.5727 | 3115.8519 |
| C                                                | -3.23860                                                                          | -1.14459                                                                           | -0.07526                                      | 3116.5286 | 3142.9341 | 3143.3711 |
| H                                                | -3.12348                                                                          | -2.07509                                                                           | -0.64245                                      | 3149.6208 | 3163.5399 | 3197.4401 |
| H                                                | -4.30953                                                                          | -1.00878                                                                           | 0.12587                                       | 3243.3157 | 3260.5978 | 3473.7171 |
| H                                                | -2.85166                                                                          | 0.84070                                                                            | 2.01925                                       |           |           |           |
| H                                                | -3.36431                                                                          | 0.51435                                                                            | -1.60852                                      |           |           |           |
| <b><u>Statistical Thermodynamic Analysis</u></b> |                                                                                   |                                                                                    |                                               |           |           |           |
| Temperature=298.15 K                             |                                                                                   |                                                                                    | Pressure=1 atm                                |           |           |           |
| Zero-point correction= 0.207506                  |                                                                                   |                                                                                    | Electronic Energy = -1427.71314639            |           |           |           |
| Internal Energy (E)= -1427.49156639              |                                                                                   |                                                                                    | Enthalpy (H)= -1427.49062139                  |           |           |           |
| Gibbs Free Energy (G)=-1427.54723239             |                                                                                   |                                                                                    | Gibbs Free Energy of Solvation=-1427.57235612 |           |           |           |

| St.Pt.                                           | General Structure | Ball & Stick model        |                                               |            |           |           |
|--------------------------------------------------|-------------------|---------------------------|-----------------------------------------------|------------|-----------|-----------|
| 1MTS <sub>7a</sub>                               |                   |                           |                                               |            |           |           |
| <b><u>Cartesian co-ordinate</u></b>              |                   | <b><u>Frequencies</u></b> |                                               |            |           |           |
| -----<br>Atoms                                   | X                 | Y                         | Z                                             | -----      | -----     | -----     |
| -----                                            | -----             | -----                     | -----                                         | -----      | -----     | -----     |
| C                                                | 2.50704           | 0.21145                   | 1.40939                                       | -1018.1884 | 34.7359   | 53.7573   |
| C                                                | 3.11849           | 0.25022                   | 0.16333                                       | 66.5566    | 100.6218  | 121.1979  |
| Pt                                               | 0.95798           | 0.00650                   | -0.12692                                      | 129.5212   | 147.6084  | 156.1685  |
| Cl                                               | 0.65373           | 2.36693                   | -0.16452                                      | 170.5996   | 188.3819  | 211.0255  |
| Cl                                               | 1.18842           | -2.34994                  | -0.04494                                      | 250.9504   | 310.1865  | 312.1508  |
| H                                                | 3.57321           | -0.64572                  | -0.25462                                      | 328.7007   | 354.1327  | 442.0772  |
| H                                                | 3.37349           | 1.20263                   | -0.29792                                      | 457.7739   | 565.9743  | 592.6920  |
| H                                                | 2.28177           | 1.13558                   | 1.93852                                       | 639.8452   | 701.4139  | 707.5949  |
| H                                                | 2.48573           | -0.71275                  | 1.98364                                       | 754.2156   | 800.3921  | 812.6786  |
| C                                                | -1.96689          | 0.26627                   | -0.03893                                      | 831.5513   | 845.3725  | 908.0392  |
| O                                                | -3.41047          | -0.24094                  | -1.79189                                      | 935.6609   | 942.6363  | 960.4495  |
| C                                                | -3.33296          | 0.03582                   | -0.58451                                      | 1001.7514  | 1008.0602 | 1010.9872 |
| C                                                | -0.99941          | -0.21589                  | -1.09876                                      | 1015.2169  | 1045.9575 | 1133.7854 |
| H                                                | -1.84010          | 1.35845                   | 0.09372                                       | 1161.2536  | 1175.1097 | 1194.0067 |
| H                                                | -0.90325          | -1.29297                  | -1.27056                                      | 1204.8585  | 1217.6624 | 1254.1847 |
| H                                                | -0.64888          | 0.49012                   | -1.86315                                      | 1265.8386  | 1281.2518 | 1282.4193 |
| C                                                | -2.10470          | -0.36495                  | 1.35233                                       | 1296.8588  | 1328.4586 | 1344.4710 |
| C                                                | -3.53249          | 0.04054                   | 1.76776                                       | 1406.8450  | 1409.6523 | 1425.9760 |
| C                                                | -4.36994          | -0.03827                  | 0.47360                                       | 1465.7086  | 1477.0312 | 1544.7606 |
| H                                                | -2.16582          | -0.27642                  | -1.94041                                      | 1671.2171  | 1817.7990 | 2973.8953 |
| H                                                | -1.33526          | -0.00815                  | 2.04340                                       | 3048.7399  | 3058.2534 | 3059.9050 |
| H                                                | -4.89101          | -0.99819                  | 0.35668                                       | 3070.9265  | 3114.6834 | 3131.6641 |
| H                                                | -5.13279          | 0.74051                   | 0.36023                                       | 3142.9534  | 3145.0171 | 3148.4147 |
| H                                                | -3.94170          | -0.58788                  | 2.56275                                       | 3179.9403  | 3242.3474 | 3259.7855 |
| H                                                | -3.52552          | 1.07232                   | 2.13992                                       |            |           |           |
| H                                                | -2.00034          | -1.45683                  | 1.27861                                       |            |           |           |
| <b><u>Statistical Thermodynamic Analysis</u></b> |                   |                           |                                               |            |           |           |
| Temperature=298.15 K                             |                   |                           | Pressure=1 atm                                |            |           |           |
| Zero-point correction= 0.202420                  |                   |                           | Electronic Energy = -1427.68494750            |            |           |           |
| Internal Energy (E)= -1427.4678345               |                   |                           | Enthalpy (H)= -1427.4668895                   |            |           |           |
| Gibbs Free Energy (G)=-1427.5264365              |                   |                           | Gibbs Free Energy of Solvation=-1427.55834167 |            |           |           |

| St.Pt.                              | General Structure                                                                                                                     | Ball & Stick model                                                                 |          |           |           |           |
|-------------------------------------|---------------------------------------------------------------------------------------------------------------------------------------|------------------------------------------------------------------------------------|----------|-----------|-----------|-----------|
| 1DTS <sub>2</sub>                   | 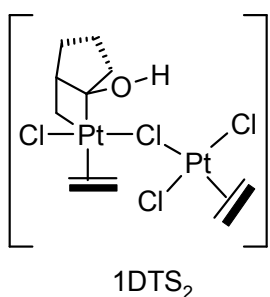 <p style="text-align: center;">1DTS<sub>2</sub></p> |  |          |           |           |           |
| <b><u>Cartesian co-ordinate</u></b> |                                                                                                                                       | <b><u>Frequencies</u></b>                                                          |          |           |           |           |
| Atoms                               | X                                                                                                                                     | Y                                                                                  | Z        | -482.8469 | 36.5920   | 46.4976   |
| C                                   | -1.30511                                                                                                                              | -2.90692                                                                           | 0.22514  | 63.5151   | 74.5724   | 79.1444   |
| C                                   | -1.21347                                                                                                                              | -2.23894                                                                           | 1.39759  | 90.9422   | 105.4337  | 113.4535  |
| Pt                                  | -1.79279                                                                                                                              | -0.54991                                                                           | -0.40675 | 121.1576  | 127.4182  | 152.1481  |
| Cl                                  | -4.03171                                                                                                                              | -0.80335                                                                           | 0.24958  | 155.5634  | 174.6890  | 181.2878  |
| Cl                                  | 0.33026                                                                                                                               | -0.48305                                                                           | -1.56031 | 184.4219  | 195.3222  | 206.5858  |
| H                                   | -0.24407                                                                                                                              | -1.89748                                                                           | 1.75915  | 211.5930  | 214.1802  | 222.6078  |
| H                                   | -2.08578                                                                                                                              | -2.10156                                                                           | 2.03430  | 254.5608  | 285.0462  | 293.6769  |
| H                                   | -2.24903                                                                                                                              | -3.34020                                                                           | -0.10458 | 295.9910  | 303.0098  | 317.6329  |
| H                                   | -0.40767                                                                                                                              | -3.11719                                                                           | -0.35527 | 332.4126  | 340.8956  | 360.7285  |
| Pt                                  | 2.27718                                                                                                                               | 0.03281                                                                            | -0.02286 | 422.2007  | 438.0454  | 495.6795  |
| Cl                                  | 2.28193                                                                                                                               | 2.30511                                                                            | -0.69161 | 513.6168  | 527.5180  | 567.8802  |
| Cl                                  | 2.25659                                                                                                                               | -2.20685                                                                           | 0.73777  | 619.4355  | 630.9825  | 763.4901  |
| H                                   | 4.74832                                                                                                                               | 0.75234                                                                            | -0.70073 | 793.3440  | 821.3487  | 823.8627  |
| C                                   | 4.39874                                                                                                                               | 0.01940                                                                            | 0.02458  | 839.2731  | 842.2579  | 848.1268  |
| C                                   | 3.90362                                                                                                                               | 0.44164                                                                            | 1.27580  | 908.3397  | 942.6476  | 965.5908  |
| H                                   | 4.72806                                                                                                                               | -1.00869                                                                           | -0.11585 | 993.3154  | 997.1925  | 1020.2834 |
| H                                   | 3.86391                                                                                                                               | -0.26270                                                                           | 2.10527  | 1030.2610 | 1037.4544 | 1039.2726 |
| H                                   | 3.89667                                                                                                                               | 1.50234                                                                            | 1.52146  | 1046.1690 | 1065.7633 | 1080.7354 |
| C                                   | -1.46030                                                                                                                              | 2.13282                                                                            | -0.32863 | 1105.7149 | 1136.8081 | 1159.2392 |
| O                                   | -0.03447                                                                                                                              | 0.76757                                                                            | 1.26559  | 1176.6818 | 1204.9634 | 1211.2960 |
| C                                   | -1.28045                                                                                                                              | 1.12898                                                                            | 0.81414  | 1221.6051 | 1228.2077 | 1242.9080 |
| C                                   | -2.18843                                                                                                                              | 1.24707                                                                            | -1.34357 | 1254.5336 | 1275.0551 | 1311.9340 |
| H                                   | -3.27136                                                                                                                              | 1.39231                                                                            | -1.38101 | 1318.7095 | 1340.7966 | 1344.8988 |
| H                                   | -1.73578                                                                                                                              | 1.21461                                                                            | -2.33702 | 1357.4398 | 1409.3287 | 1425.7621 |
| H                                   | 0.31863                                                                                                                               | 1.44191                                                                            | 1.86443  | 1427.2190 | 1437.2938 | 1463.4430 |
| C                                   | -2.28420                                                                                                                              | 1.46189                                                                            | 1.90406  | 1480.8472 | 1516.9430 | 1626.6938 |
| H                                   | -2.76607                                                                                                                              | 0.58619                                                                            | 2.34756  | 3002.0887 | 3044.7528 | 3071.1681 |
| C                                   | -3.23036                                                                                                                              | 2.48328                                                                            | 1.27913  | 3089.8456 | 3097.1357 | 3112.7951 |
| H                                   | -4.05289                                                                                                                              | 1.96636                                                                            | 0.77030  | 3131.0421 | 3132.7360 | 3137.5800 |
| H                                   | -3.67508                                                                                                                              | 3.14729                                                                            | 2.02658  | 3139.2095 | 3141.2900 | 3152.1662 |
| C                                   | -2.34102                                                                                                                              | 3.22761                                                                            | 0.27590  | 3189.3354 | 3237.7422 | 3238.2219 |
| H                                   | -2.90741                                                                                                                              | 3.76716                                                                            | -0.49157 | 3253.4002 | 3264.2271 | 3815.0753 |
| H                                   | -1.71204                                                                                                                              | 3.96190                                                                            | 0.79873  |           |           |           |
| H                                   | -1.69280                                                                                                                              | 1.94039                                                                            | 2.70418  |           |           |           |
| H                                   | -0.48648                                                                                                                              | 2.46563                                                                            | -0.70838 |           |           |           |

**Statistical Thermodynamic Analysis**

Temperature=298.15 K

Pressure=1 atm

Zero-point correction= 0.265505

Electronic Energy = -2545.79436837

Internal Energy (E)= -2545.50601937

Enthalpy (H)= -2545.50507537

Gibbs Free Energy (G)=-2545.58237237

Gibbs Free Energy of Solvation=-2545.63245017

| St.Pt.                              | General Structure                                                                 | Ball & Stick model                                                                 |          |            |           |           |
|-------------------------------------|-----------------------------------------------------------------------------------|------------------------------------------------------------------------------------|----------|------------|-----------|-----------|
| 1DTS <sub>6a</sub>                  | 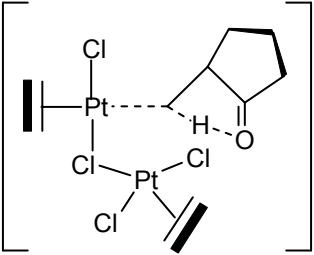 |  |          |            |           |           |
| <b><u>Cartesian co-ordinate</u></b> |                                                                                   | <b><u>Frequencies</u></b>                                                          |          |            |           |           |
| -----<br>Atoms                      | X                                                                                 | Y                                                                                  | Z        | -----      | -----     | -----     |
| -----                               | -----                                                                             | -----                                                                              | -----    | -----      | -----     | -----     |
| C                                   | 0.81027                                                                           | -3.22439                                                                           | -0.37709 | -1164.0198 | 22.8575   | 36.6038   |
| C                                   | 1.78298                                                                           | -2.85900                                                                           | -1.29630 | 48.1396    | 60.0995   | 62.8687   |
| Pt                                  | 1.38140                                                                           | -1.12570                                                                           | 0.00961  | 78.8136    | 82.9935   | 88.6286   |
| Cl                                  | 3.08118                                                                           | -1.83437                                                                           | 1.45819  | 103.5412   | 124.1073  | 128.8835  |
| Cl                                  | -0.26466                                                                          | -0.39110                                                                           | -1.61068 | 143.4864   | 160.6985  | 169.1095  |
| H                                   | 1.50473                                                                           | -2.55695                                                                           | -2.30458 | 173.1290   | 176.9322  | 187.5115  |
| H                                   | 2.82628                                                                           | -3.11963                                                                           | -1.12882 | 198.2839   | 201.5467  | 226.7950  |
| H                                   | 1.08634                                                                           | -3.76066                                                                           | 0.52879  | 254.9427   | 263.5314  | 278.1523  |
| H                                   | -0.25209                                                                          | -3.18233                                                                           | -0.62141 | 313.5142   | 331.0663  | 336.6243  |
| Pt                                  | -2.08597                                                                          | 0.19369                                                                            | -0.08321 | 339.5050   | 343.9592  | 393.5992  |
| Cl                                  | -2.66956                                                                          | -2.08051                                                                           | 0.11846  | 432.2261   | 455.1564  | 471.4578  |
| Cl                                  | -1.48737                                                                          | 2.49466                                                                            | -0.24884 | 555.9548   | 582.7873  | 641.0543  |
| H                                   | -4.71416                                                                          | -0.06618                                                                           | 0.32275  | 683.8623   | 697.2275  | 737.1080  |
| C                                   | -4.04712                                                                          | 0.74930                                                                            | 0.59643  | 753.4696   | 816.0906  | 816.7513  |
| C                                   | -3.20108                                                                          | 0.62586                                                                            | 1.70386  | 823.5190   | 829.5548  | 841.3355  |
| H                                   | -4.25717                                                                          | 1.72975                                                                            | 0.17265  | 915.5051   | 939.7163  | 947.1140  |
| H                                   | -2.75525                                                                          | 1.51248                                                                            | 2.15126  | 981.7300   | 989.1650  | 1006.1565 |
| H                                   | -3.20770                                                                          | -0.28484                                                                           | 2.29992  | 1014.7049  | 1015.2002 | 1029.9885 |
| C                                   | 2.33144                                                                           | 1.72950                                                                            | 0.18437  | 1034.8676  | 1036.4072 | 1038.7079 |
| O                                   | 1.57733                                                                           | 3.20879                                                                            | 1.83349  | 1130.1944  | 1160.3203 | 1176.6651 |
| C                                   | 2.14176                                                                           | 3.11174                                                                            | 0.74081  | 1190.8241  | 1201.5796 | 1204.0251 |
| C                                   | 1.42369                                                                           | 0.84158                                                                            | 1.01713  | 1214.0714  | 1258.5388 | 1264.5537 |
| C                                   | 2.49389                                                                           | 4.16506                                                                            | -0.24587 | 1275.6048  | 1284.3382 | 1286.4041 |
| H                                   | 1.57352                                                                           | 4.74260                                                                            | -0.41584 | 1297.0257  | 1325.0632 | 1344.3038 |
| C                                   | 2.90009                                                                           | 3.34928                                                                            | -1.48541 | 1395.4006  | 1413.7039 | 1426.8211 |
| H                                   | 2.64117                                                                           | 3.85575                                                                            | -2.41862 | 1435.6652  | 1451.1674 | 1474.9125 |
| H                                   | 3.98697                                                                           | 3.19366                                                                            | -1.48859 | 1529.5774  | 1550.1844 | 1648.0521 |
| C                                   | 2.17867                                                                           | 1.99972                                                                            | -1.31879 | 1811.7650  | 2996.2547 | 3044.2768 |
| H                                   | 1.11301                                                                           | 2.08770                                                                            | -1.57133 | 3055.1466  | 3061.0936 | 3078.0234 |
| H                                   | 2.60369                                                                           | 1.20235                                                                            | -1.93613 | 3120.1151  | 3127.0128 | 3138.0982 |
| H                                   | 3.24159                                                                           | 4.87057                                                                            | 0.13196  | 3141.8978  | 3143.5226 | 3143.9255 |
| H                                   | 3.38337                                                                           | 1.44726                                                                            | 0.37644  | 3144.0055  | 3169.3281 | 3234.9029 |
| H                                   | 1.28513                                                                           | 1.89665                                                                            | 1.85422  | 3241.4151  | 3253.0283 | 3256.9621 |
| H                                   | 0.33779                                                                           | 0.97579                                                                            | 0.91334  |            |           |           |
| H                                   | 1.83996                                                                           | 0.34346                                                                            | 1.90038  |            |           |           |

**Statistical Thermodynamic Analysis**

Temperature=298.15 K

Pressure=1 atm

Zero-point correction= 0.260888

Electronic Energy = -2545.78015172

Internal Energy (E)= -2545.49609972

Enthalpy (H)= -2545.49515572

Gibbs Free Energy (G)=-2545.57503772

Gibbs Free Energy of Solvation=-2545.63381852

| St.Pt.                                           | General Structure                                                                 | Ball & Stick model                                                                 |                                              |           |           |           |
|--------------------------------------------------|-----------------------------------------------------------------------------------|------------------------------------------------------------------------------------|----------------------------------------------|-----------|-----------|-----------|
| 2                                                | 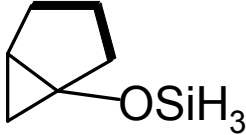 |  |                                              |           |           |           |
| <b><u>Cartesian co-ordinate</u></b>              |                                                                                   | <b><u>Frequencies</u></b>                                                          |                                              |           |           |           |
| -----<br>Atoms                                   | X                                                                                 | Y                                                                                  | Z                                            | -----     | -----     | -----     |
| -----                                            | -----                                                                             | -----                                                                              | -----                                        | -----     | -----     | -----     |
| C                                                | -0.84929                                                                          | 0.80002                                                                            | 0.78844                                      | -64.9829  | 106.9780  | 132.1657  |
| O                                                | 1.29111                                                                           | 0.57417                                                                            | -0.55253                                     | 243.0256  | 259.7381  | 357.2639  |
| C                                                | -0.08162                                                                          | 0.36522                                                                            | -0.43220                                     | 406.3416  | 456.0562  | 514.1953  |
| C                                                | -0.95219                                                                          | 1.56870                                                                            | -0.50964                                     | 610.0253  | 662.8021  | 733.6958  |
| H                                                | -1.87370                                                                          | 1.54832                                                                            | -1.08943                                     | 768.4077  | 810.2767  | 814.9997  |
| H                                                | -0.41704                                                                          | 2.51389                                                                            | -0.53732                                     | 862.6499  | 877.1533  | 910.9454  |
| C                                                | -0.65028                                                                          | -0.95878                                                                           | -0.89323                                     | 953.1021  | 963.7857  | 972.3776  |
| H                                                | -0.67545                                                                          | -1.06366                                                                           | -1.98467                                     | 979.8378  | 988.8437  | 1005.9316 |
| C                                                | -2.03558                                                                          | -1.02864                                                                           | -0.24360                                     | 1012.0153 | 1032.5957 | 1057.3774 |
| H                                                | -2.77835                                                                          | -0.54705                                                                           | -0.89148                                     | 1105.5127 | 1113.5360 | 1169.3389 |
| H                                                | -2.37837                                                                          | -2.05706                                                                           | -0.09115                                     | 1198.0354 | 1248.2562 | 1266.0883 |
| C                                                | -1.89856                                                                          | -0.24946                                                                           | 1.07511                                      | 1284.3519 | 1326.9218 | 1337.4172 |
| H                                                | -2.85708                                                                          | 0.16243                                                                            | 1.41554                                      | 1353.1683 | 1396.5261 | 1464.7891 |
| H                                                | -1.52949                                                                          | -0.91275                                                                           | 1.87099                                      | 1470.9606 | 1486.1143 | 1509.3963 |
| H                                                | -0.00832                                                                          | -1.76602                                                                           | -0.50496                                     | 2267.7083 | 2278.5152 | 2315.5390 |
| H                                                | -0.32727                                                                          | 1.28527                                                                            | 1.61075                                      | 3015.6562 | 3026.6055 | 3060.4644 |
| H                                                | 3.65213                                                                           | 0.38793                                                                            | 0.28850                                      | 3082.8605 | 3090.3868 | 3117.4025 |
| H                                                | 1.89325                                                                           | -0.54276                                                                           | 1.69846                                      | 3125.8485 | 3169.7338 | 3225.4169 |
| H                                                | 2.57270                                                                           | -1.68846                                                                           | -0.30965                                     |           |           |           |
| Si                                               | 2.37166                                                                           | -0.34970                                                                           | 0.30253                                      |           |           |           |
| <b><u>Statistical Thermodynamic Analysis</u></b> |                                                                                   |                                                                                    |                                              |           |           |           |
| Temperature=298.15 K                             |                                                                                   |                                                                                    | Pressure=1 atm                               |           |           |           |
| Zero-point correction= 0.166304                  |                                                                                   |                                                                                    | Electronic Energy = -600.345219215           |           |           |           |
| Internal Energy (E)= -600.171275215              |                                                                                   |                                                                                    | Enthalpy (H)= -600.170331215                 |           |           |           |
| Gibbs Free Energy (G)=-600.211065215             |                                                                                   |                                                                                    | Gibbs Free Energy of Solvation=-600.21317576 |           |           |           |

| St.Pt.                                           | General Structure | Ball & Stick model        |                                               |           |           |           |
|--------------------------------------------------|-------------------|---------------------------|-----------------------------------------------|-----------|-----------|-----------|
| b                                                |                   |                           |                                               |           |           |           |
| <b><u>Cartesian co-ordinate</u></b>              |                   | <b><u>Frequencies</u></b> |                                               |           |           |           |
| -----<br>Atoms                                   | X                 | Y                         | Z                                             |           |           |           |
| -----                                            |                   |                           |                                               |           |           |           |
| C                                                | -3.16324          | -1.56406                  | -0.70042                                      | 16.7812   | 57.3971   | 83.4611   |
| C                                                | -3.16341          | -1.56395                  | 0.70031                                       | 89.4958   | 95.9356   | 112.3590  |
| Pt                                               | -1.77909          | -0.07918                  | 0.00000                                       | 128.3620  | 128.9969  | 174.9616  |
| Cl                                               | -3.48186          | 1.49911                   | -0.00047                                      | 175.1650  | 191.4876  | 194.7292  |
| Cl                                               | 0.06173           | -1.66790                  | 0.00052                                       | 248.3676  | 263.1560  | 283.0715  |
| H                                                | -2.58984          | -2.30421                  | 1.25636                                       | 284.6913  | 357.7089  | 359.1469  |
| H                                                | -3.94427          | -1.03846                  | 1.24695                                       | 393.5372  | 394.8806  | 467.2203  |
| H                                                | -3.94399          | -1.03868                  | -1.24732                                      | 467.2624  | 726.5266  | 726.7192  |
| H                                                | -2.58953          | -2.30441                  | -1.25620                                      | 826.0055  | 826.0502  | 975.8408  |
| Pt                                               | 1.77909           | 0.07918                   | 0.00000                                       | 976.2062  | 1029.4951 | 1029.5557 |
| Cl                                               | 3.48186           | -1.49911                  | -0.00041                                      | 1032.8103 | 1033.0539 | 1200.9967 |
| Cl                                               | -0.06174          | 1.66790                   | 0.00047                                       | 1201.0421 | 1262.3914 | 1263.2146 |
| H                                                | 3.94427           | 1.03850                   | 1.24693                                       | 1432.6769 | 1432.7982 | 1531.3010 |
| C                                                | 3.16341           | 1.56397                   | 0.70027                                       | 1532.4162 | 3142.2375 | 3142.2692 |
| C                                                | 3.16325           | 1.56404                   | -0.70046                                      | 3144.5248 | 3144.5613 | 3241.1654 |
| H                                                | 2.58984           | 2.30425                   | 1.25629                                       | 3241.1782 | 3257.0540 | 3257.0609 |
| H                                                | 2.58954           | 2.30437                   | -1.25626                                      |           |           |           |
| H                                                | 3.94399           | 1.03864                   | -1.24734                                      |           |           |           |
| H                                                | 2.57270           | -1.68846                  | -0.30965                                      |           |           |           |
| Si                                               | 2.37166           | -0.34970                  | 0.30253                                       |           |           |           |
| <b><u>Statistical Thermodynamic Analysis</u></b> |                   |                           |                                               |           |           |           |
| Temperature=298.15 K                             |                   |                           | Pressure=1 atm                                |           |           |           |
| Zero-point correction= 0.115224                  |                   |                           | Electronic Energy = -2236.15949615            |           |           |           |
| Internal Energy (E)= -2236.02872015              |                   |                           | Enthalpy (H)= -2236.02777615                  |           |           |           |
| Gibbs Free Energy (G)=-2236.09111615             |                   |                           | Gibbs Free Energy of Solvation=-2236.14698202 |           |           |           |



| St.Pt.                                           | General Structure | Ball & Stick model        |                                             |           |           |           |
|--------------------------------------------------|-------------------|---------------------------|---------------------------------------------|-----------|-----------|-----------|
| c                                                |                   |                           |                                             |           |           |           |
| <b><u>Cartesian co-ordinate</u></b>              |                   | <b><u>Frequencies</u></b> |                                             |           |           |           |
| -----<br>Atoms                                   | X                 | Y                         | Z                                           |           |           |           |
| -----                                            |                   |                           |                                             |           |           |           |
| Pt                                               | 0.00002           | 0.21970                   | 0.00002                                     | 115.8772  | 129.5588  | 136.2589  |
| Cl                                               | -2.32706          | 0.33871                   | 0.00012                                     | 150.4350  | 340.4505  | 363.0286  |
| Cl                                               | 2.32709           | 0.33862                   | -0.00020                                    | 459.6862  | 499.2095  | 780.0821  |
| H                                                | -0.92957          | -1.91865                  | 1.25376                                     | 823.8908  | 939.0218  | 1055.2448 |
| C                                                | -0.00006          | -1.74806                  | 0.71228                                     | 1057.7554 | 1197.3888 | 1219.3178 |
| C                                                | -0.00017          | -1.74805                  | -0.71227                                    | 1423.1821 | 1502.4458 | 3141.3942 |
| H                                                | 0.92951           | -1.91877                  | 1.25361                                     | 3141.5787 | 3242.6592 | 3257.8357 |
| H                                                | 0.92932           | -1.91876                  | -1.25375                                    |           |           |           |
| H                                                | -0.92977          | -1.91863                  | -1.25360                                    |           |           |           |
| Pt                                               | 1.77909           | 0.07918                   | 0.00000                                     |           |           |           |
| Cl                                               | 3.48186           | -1.49911                  | -0.00041                                    |           |           |           |
| Cl                                               | -0.06174          | 1.66790                   | 0.00047                                     |           |           |           |
| H                                                | 3.94427           | 1.03850                   | 1.24693                                     |           |           |           |
| C                                                | 3.16341           | 1.56397                   | 0.70027                                     |           |           |           |
| C                                                | 3.16325           | 1.56404                   | -0.70046                                    |           |           |           |
| H                                                | 2.58984           | 2.30425                   | 1.25629                                     |           |           |           |
| H                                                | 2.58954           | 2.30437                   | -1.25626                                    |           |           |           |
| H                                                | 3.94399           | 1.03864                   | -1.24734                                    |           |           |           |
| H                                                | 2.57270           | -1.68846                  | -0.30965                                    |           |           |           |
| Si                                               | 2.37166           | -0.34970                  | 0.30253                                     |           |           |           |
| <b><u>Statistical Thermodynamic Analysis</u></b> |                   |                           |                                             |           |           |           |
| Temperature=298.15 K                             |                   |                           | Pressure=1 atm                              |           |           |           |
| Zero-point correction= 0.056900                  |                   |                           | Electronic Energy = -1118.03818476          |           |           |           |
| Internal Energy (E)= -1117.97425176              |                   |                           | Enthalpy (H)= -1117.97330776                |           |           |           |
| Gibbs Free Energy (G)=-1118.01492176             |                   |                           | Gibbs Free Energy of Solvation=-1118.063618 |           |           |           |

| St.Pt.                                           | General Structure                                                                 | Ball & Stick model                                                                 |                                               |           |           |           |
|--------------------------------------------------|-----------------------------------------------------------------------------------|------------------------------------------------------------------------------------|-----------------------------------------------|-----------|-----------|-----------|
| 2MTS <sub>5</sub>                                | 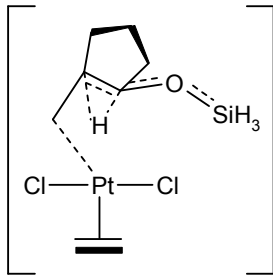 |  |                                               |           |           |           |
| <b><u>Cartesian co-ordinate</u></b>              |                                                                                   | <b><u>Frequencies</u></b>                                                          |                                               |           |           |           |
| -----<br>Atoms                                   | X                                                                                 | Y                                                                                  | Z                                             | -----     | -----     | -----     |
| -----                                            | -----                                                                             | -----                                                                              | -----                                         | -----     | -----     | -----     |
| C                                                | -2.81207                                                                          | -1.16653                                                                           | 0.90424                                       | -573.7448 | 40.0397   | 52.6199   |
| C                                                | -2.54910                                                                          | 0.02862                                                                            | 1.53827                                       | 73.3681   | 89.9623   | 92.2164   |
| Pt                                               | -1.00528                                                                          | -0.26046                                                                           | -0.07868                                      | 119.3750  | 138.3662  | 142.3183  |
| Cl                                               | -2.36589                                                                          | 0.91201                                                                            | -1.59887                                      | 158.6968  | 171.4262  | 177.1271  |
| Cl                                               | 0.42386                                                                           | -1.39519                                                                           | 1.50431                                       | 191.1287  | 199.9790  | 222.0503  |
| H                                                | -1.98947                                                                          | 0.05205                                                                            | 2.47186                                       | 279.3193  | 296.4955  | 306.3441  |
| H                                                | -3.07401                                                                          | 0.93658                                                                            | 1.24775                                       | 335.3055  | 359.3427  | 400.8647  |
| H                                                | -3.54823                                                                          | -1.21823                                                                           | 0.10461                                       | 414.4190  | 531.2263  | 570.3708  |
| H                                                | -2.46677                                                                          | -2.10868                                                                           | 1.32559                                       | 620.8804  | 647.3749  | 678.4177  |
| C                                                | 1.91207                                                                           | -0.20529                                                                           | -0.93210                                      | 700.4578  | 715.1659  | 731.8388  |
| O                                                | 2.35058                                                                           | 1.67505                                                                            | 0.58201                                       | 742.9288  | 817.1158  | 839.2493  |
| C                                                | 2.66284                                                                           | 0.54442                                                                            | -0.01845                                      | 874.2340  | 929.8724  | 937.9481  |
| C                                                | 0.57322                                                                           | 0.08269                                                                            | -1.44604                                      | 942.4434  | 973.3954  | 983.9153  |
| H                                                | 0.46389                                                                           | 1.12041                                                                            | -1.77565                                      | 992.3097  | 994.4997  | 1007.9053 |
| H                                                | 0.33554                                                                           | -0.58125                                                                           | -2.28508                                      | 1011.6907 | 1029.8470 | 1060.3293 |
| C                                                | 4.04481                                                                           | -0.01799                                                                           | 0.16203                                       | 1065.0585 | 1147.6883 | 1177.1762 |
| H                                                | 4.73113                                                                           | 0.59354                                                                            | -0.44078                                      | 1206.2546 | 1212.7150 | 1224.2277 |
| C                                                | 3.90935                                                                           | -1.44552                                                                           | -0.37808                                      | 1259.6471 | 1264.5634 | 1295.3645 |
| H                                                | 4.83486                                                                           | -1.82839                                                                           | -0.81457                                      | 1307.2501 | 1328.0104 | 1335.1414 |
| H                                                | 3.62796                                                                           | -2.11674                                                                           | 0.44298                                       | 1416.5619 | 1424.9500 | 1453.1645 |
| C                                                | 2.75292                                                                           | -1.37191                                                                           | -1.38571                                      | 1456.5087 | 1466.0374 | 1479.9110 |
| H                                                | 3.10004                                                                           | -1.14843                                                                           | -2.40456                                      | 1554.7677 | 1566.2885 | 1771.8099 |
| H                                                | 2.15454                                                                           | -2.28919                                                                           | -1.43726                                      | 2330.0402 | 2338.5654 | 2364.7118 |
| H                                                | 4.37612                                                                           | 0.04673                                                                            | 1.20286                                       | 3046.7036 | 3050.4250 | 3069.0396 |
| H                                                | 1.84668                                                                           | -0.49804                                                                           | 0.38713                                       | 3083.4812 | 3107.8788 | 3126.9486 |
| H                                                | 1.54867                                                                           | 3.84732                                                                            | 1.40986                                       | 3141.4078 | 3143.1967 | 3147.4563 |
| H                                                | 0.28271                                                                           | 2.92694                                                                            | -0.44528                                      | 3154.6169 | 3239.4995 | 3257.4606 |
| H                                                | 0.07127                                                                           | 1.96049                                                                            | 1.80668                                       |           |           |           |
| Si                                               | 0.95447                                                                           | 2.62457                                                                            | 0.83051                                       |           |           |           |
| <b><u>Statistical Thermodynamic Analysis</u></b> |                                                                                   |                                                                                    |                                               |           |           |           |
| Temperature=298.15 K                             |                                                                                   |                                                                                    | Pressure=1 atm                                |           |           |           |
| Zero-point correction= 0.220091                  |                                                                                   |                                                                                    | Electronic Energy = -1718.39336781            |           |           |           |
| Internal Energy (E)= -1718.15627681              |                                                                                   |                                                                                    | Enthalpy (H)= -1718.15533281                  |           |           |           |
| Gibbs Free Energy (G)=-1718.21942581             |                                                                                   |                                                                                    | Gibbs Free Energy of Solvation=-1718.25040221 |           |           |           |

| St.Pt.                              | General Structure | Ball & Stick model        |          |           |           |           |
|-------------------------------------|-------------------|---------------------------|----------|-----------|-----------|-----------|
| 2DTS <sub>1</sub>                   |                   |                           |          |           |           |           |
| <b><u>Cartesian co-ordinate</u></b> |                   | <b><u>Frequencies</u></b> |          |           |           |           |
| -----<br>Atoms                      | X                 | Y                         | Z        |           |           |           |
| -----                               |                   |                           |          |           |           |           |
| C                                   | -2.09785          | -3.06996                  | 0.11930  | -211.6415 | 30.0328   | 39.4400   |
| C                                   | -1.64019          | -2.48981                  | 1.28450  | 47.3258   | 49.2341   | 74.8379   |
| Pt                                  | -1.83330          | -0.86057                  | -0.24768 | 81.0455   | 95.1857   | 97.9873   |
| Cl                                  | -4.10116          | -0.57417                  | 0.29063  | 107.5600  | 120.9163  | 129.9598  |
| Cl                                  | 0.37657           | -1.38814                  | -1.06628 | 137.5762  | 141.2689  | 149.2016  |
| H                                   | -0.57870          | -2.49006                  | 1.53548  | 156.9276  | 164.1535  | 166.4409  |
| H                                   | -2.33974          | -2.20866                  | 2.06945  | 171.3759  | 193.9628  | 194.5539  |
| H                                   | -3.15913          | -3.25770                  | -0.02872 | 222.5282  | 252.7067  | 276.8323  |
| H                                   | -1.40663          | -3.55771                  | -0.56527 | 296.4424  | 297.3109  | 306.4960  |
| Pt                                  | 2.30539           | -0.17657                  | -0.17549 | 315.0078  | 322.8531  | 335.0808  |
| Cl                                  | 2.11141           | 1.43834                   | -1.90239 | 337.5786  | 388.2036  | 410.9665  |
| Cl                                  | 2.40652           | -1.67632                  | 1.64338  | 414.1409  | 437.0256  | 467.2268  |
| H                                   | 4.71127           | 0.25274                   | -1.23169 | 485.9713  | 550.2058  | 621.8863  |
| C                                   | 4.44383           | -0.02092                  | -0.21247 | 656.2974  | 715.8593  | 730.1358  |
| C                                   | 3.94348           | 0.94206                   | 0.67124  | 737.8298  | 743.0408  | 749.7987  |
| H                                   | 4.82409           | -0.96862                  | 0.16536  | 791.2820  | 820.7729  | 826.8367  |
| H                                   | 3.96309           | 0.75004                   | 1.74289  | 828.9765  | 878.5803  | 897.0517  |
| H                                   | 3.85058           | 1.97602                   | 0.34234  | 926.9863  | 966.5414  | 970.7420  |
| C                                   | -1.29401          | 2.43984                   | -0.72724 | 978.7268  | 992.0854  | 1001.1189 |
| O                                   | -0.40141          | 1.32716                   | 1.27430  | 1003.8267 | 1010.9668 | 1020.1535 |
| C                                   | -1.39582          | 1.82185                   | 0.57177  | 1021.8714 | 1037.1560 | 1038.3341 |
| C                                   | -1.71395          | 1.03069                   | -1.28815 | 1041.7401 | 1078.7297 | 1108.1239 |
| H                                   | -2.70869          | 1.11018                   | -1.73210 | 1150.5466 | 1190.3845 | 1206.6240 |
| H                                   | -0.92044          | 0.75583                   | -1.98827 | 1212.2674 | 1218.9739 | 1240.5562 |
| C                                   | -2.68423          | 2.18398                   | 1.23617  | 1264.9927 | 1265.2639 | 1294.9958 |
| H                                   | -3.19863          | 1.34572                   | 1.71382  | 1299.3907 | 1317.5124 | 1325.3466 |
| C                                   | -3.48239          | 2.91581                   | 0.15846  | 1348.5727 | 1383.6884 | 1414.4275 |
| H                                   | -4.13419          | 2.19654                   | -0.34997 | 1423.8046 | 1431.4957 | 1466.3817 |
| H                                   | -4.12136          | 3.70085                   | 0.57160  | 1478.0656 | 1529.5483 | 1534.5088 |
| C                                   | -2.41255          | 3.46645                   | -0.79980 | 1560.9745 | 2297.2774 | 2332.0253 |
| H                                   | -2.77986          | 3.60514                   | -1.82221 | 2382.9545 | 2993.5944 | 3046.8195 |
| H                                   | -2.03543          | 4.43633                   | -0.44691 | 3078.8344 | 3084.2899 | 3118.3936 |
| H                                   | -2.35691          | 2.87553                   | 2.03404  | 3134.8486 | 3134.9809 | 3136.1644 |
| H                                   | -0.29315          | 2.71102                   | -1.07165 | 3140.3605 | 3143.1445 | 3144.6670 |
| H                                   | 1.68590           | 1.30665                   | 2.68756  | 3149.7745 | 3194.9350 | 3237.3150 |
| H                                   | 1.58552           | 2.97241                   | 0.85717  | 3238.8343 | 3253.6187 | 3258.7846 |

|    |         |         |         |
|----|---------|---------|---------|
| H  | 0.20113 | 3.24201 | 2.82065 |
| Si | 0.86532 | 2.25786 | 1.92970 |

**Statistical Thermodynamic Analysis**

Temperature=298.15 K

Pressure=1 atm

Zero-point correction= 0.281857

Electronic Energy = -2836.48683554

Internal Energy (E)= -2836.17994354

Enthalpy (H)= -2836.17899854

Gibbs Free Energy (G)=-2836.26193854

Gibbs Free Energy of Solvation=-2836.31602428

| St.Pt.                                           | General Structure                                                                 | Ball & Stick model                                                                 |                                               |           |           |           |
|--------------------------------------------------|-----------------------------------------------------------------------------------|------------------------------------------------------------------------------------|-----------------------------------------------|-----------|-----------|-----------|
| 1                                                | 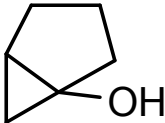 |  |                                               |           |           |           |
| <b><u>Cartesian co-ordinate</u></b>              |                                                                                   | <b><u>Frequencies</u></b>                                                          |                                               |           |           |           |
| -----<br>Atoms                                   | X                                                                                 | Y                                                                                  | Z                                             |           |           |           |
| -----                                            |                                                                                   |                                                                                    |                                               |           |           |           |
| C                                                | -0.03028                                                                          | -1.05068                                                                           | -0.41217                                      | 218.7186  | 249.7708  | 346.9290  |
| O                                                | 2.00227                                                                           | 0.38667                                                                            | -0.52845                                      | 369.7460  | 389.5136  | 457.7402  |
| C                                                | 0.74672                                                                           | 0.15044                                                                            | 0.02888                                       | 550.7976  | 618.5293  | 712.7037  |
| C                                                | 0.57091                                                                           | -1.00145                                                                           | 0.97587                                       | 826.0150  | 847.4259  | 898.7741  |
| H                                                | -0.07826                                                                          | -0.90477                                                                           | 1.84133                                       | 916.2375  | 921.1445  | 967.1094  |
| H                                                | 1.45155                                                                           | -1.61605                                                                           | 1.12589                                       | 987.7957  | 1012.3285 | 1039.2903 |
| H                                                | 2.55325                                                                           | 0.78977                                                                            | 0.15229                                       | 1065.7574 | 1099.6435 | 1125.4589 |
| C                                                | -0.21550                                                                          | 1.31928                                                                            | 0.14884                                       | 1174.1473 | 1211.8734 | 1253.4906 |
| H                                                | 0.00395                                                                           | 1.98045                                                                            | 0.99447                                       | 1274.9256 | 1290.3576 | 1330.2710 |
| C                                                | -1.60371                                                                          | 0.66350                                                                            | 0.25353                                       | 1349.9471 | 1361.9481 | 1370.9121 |
| H                                                | -1.83307                                                                          | 0.43898                                                                            | 1.29968                                       | 1425.9593 | 1501.3010 | 1506.3580 |
| H                                                | -2.40237                                                                          | 1.31192                                                                            | -0.11380                                      | 1516.1429 | 1536.0356 | 3069.6620 |
| C                                                | -1.48666                                                                          | -0.64650                                                                           | -0.55506                                      | 3076.7137 | 3096.2241 | 3117.9686 |
| H                                                | -2.18673                                                                          | -1.41105                                                                           | -0.20396                                      | 3122.9285 | 3145.5093 | 3150.0545 |
| H                                                | -1.70299                                                                          | -0.45950                                                                           | -1.61272                                      | 3221.3029 | 3241.3378 | 3880.0908 |
| H                                                | -0.12787                                                                          | 1.90700                                                                            | -0.77205                                      |           |           |           |
| H                                                | 0.41549                                                                           | -1.73776                                                                           | -1.12287                                      |           |           |           |
| <b><u>Statistical Thermodynamic Analysis</u></b> |                                                                                   |                                                                                    |                                               |           |           |           |
| Temperature=298.15 K                             |                                                                                   |                                                                                    | Pressure=1 atm                                |           |           |           |
| Zero-point correction= 0.152288                  |                                                                                   |                                                                                    | Electronic Energy = -309.718741856            |           |           |           |
| Internal Energy (E)= -309.560224856              |                                                                                   |                                                                                    | Enthalpy (H)= -309.559280856                  |           |           |           |
| Gibbs Free Energy (G)=-309.595983856             |                                                                                   |                                                                                    | Gibbs Free Energy of Solvation=-309.599133984 |           |           |           |

| St.Pt.                                           | General Structure                                                                 | Ball & Stick model                                                                 |                                               |           |           |           |
|--------------------------------------------------|-----------------------------------------------------------------------------------|------------------------------------------------------------------------------------|-----------------------------------------------|-----------|-----------|-----------|
| b <sub>Pd</sub>                                  | 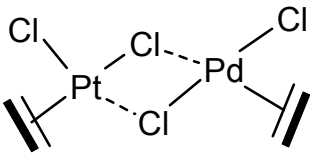 |  |                                               |           |           |           |
| <b><u>Cartesian co-ordinate</u></b>              |                                                                                   | <b><u>Frequencies</u></b>                                                          |                                               |           |           |           |
| -----<br>Atoms<br>-----                          | X                                                                                 | Y                                                                                  | Z                                             |           |           |           |
| -----                                            |                                                                                   |                                                                                    |                                               |           |           |           |
| C                                                | -2.94641                                                                          | -1.55414                                                                           | -0.56972                                      | 11.4059   | 52.7471   | 80.9671   |
| C                                                | -2.81419                                                                          | -1.53627                                                                           | 0.82573                                       | 89.0270   | 93.8371   | 110.8168  |
| Pt                                               | -1.52907                                                                          | -0.07182                                                                           | -0.01838                                      | 126.8404  | 131.6688  | 143.5943  |
| Cl                                               | -3.22503                                                                          | 1.49033                                                                            | 0.14284                                       | 162.8891  | 181.6858  | 192.9596  |
| Cl                                               | 0.30351                                                                           | -1.66640                                                                           | -0.18215                                      | 234.2716  | 253.8482  | 271.1481  |
| H                                                | -2.18513                                                                          | -2.26582                                                                           | 1.32712                                       | 280.7738  | 281.8292  | 350.1532  |
| H                                                | -3.54090                                                                          | -1.00610                                                                           | 1.43273                                       | 354.5792  | 386.0877  | 407.1973  |
| H                                                | -3.77550                                                                          | -1.03886                                                                           | -1.04373                                      | 512.1322  | 601.5285  | 771.2757  |
| H                                                | -2.42196                                                                          | -2.29872                                                                           | -1.16119                                      | 832.8304  | 835.2863  | 1021.0858 |
| Cl                                               | 3.71962                                                                           | -1.46273                                                                           | 0.13777                                       | 1040.9809 | 1058.0488 | 1061.0577 |
| Cl                                               | 0.20305                                                                           | 1.69304                                                                            | -0.18615                                      | 1074.0606 | 1079.0580 | 1226.0963 |
| H                                                | 4.08352                                                                           | 1.03826                                                                            | 1.41772                                       | 1236.8976 | 1287.3608 | 1337.1857 |
| C                                                | 3.40436                                                                           | 1.62225                                                                            | 0.80493                                       | 1471.6477 | 1471.9254 | 1574.7216 |
| C                                                | 3.53376                                                                           | 1.63200                                                                            | -0.56244                                      | 1615.1968 | 3173.1520 | 3180.5180 |
| H                                                | 2.72855                                                                           | 2.31061                                                                            | 1.30461                                       | 3181.6300 | 3185.6525 | 3271.8199 |
| H                                                | 2.96355                                                                           | 2.32847                                                                            | -1.17062                                      | 3280.7111 | 3289.6790 | 3297.2171 |
| H                                                | 4.31748                                                                           | 1.05716                                                                            | -1.04566                                      |           |           |           |
| H                                                | 2.02202                                                                           | 0.07766                                                                            | -0.02452                                      |           |           |           |
| <b><u>Statistical Thermodynamic Analysis</u></b> |                                                                                   |                                                                                    |                                               |           |           |           |
| Temperature=298.15 K                             |                                                                                   |                                                                                    | Pressure=1 atm                                |           |           |           |
| Zero-point correction= 0.116567                  |                                                                                   |                                                                                    | Electronic Energy = -2243.56719436            |           |           |           |
| Internal Energy (E)= -2243.43473536              |                                                                                   |                                                                                    | Enthalpy (H)= -2243.43379136                  |           |           |           |
| Gibbs Free Energy (G)=-2243.49804136             |                                                                                   |                                                                                    | Gibbs Free Energy of Solvation=-2243.51562026 |           |           |           |

| St.Pt.                              | General Structure | Ball & Stick model        |          |           |           |           |
|-------------------------------------|-------------------|---------------------------|----------|-----------|-----------|-----------|
| 1PdI <sub>1</sub>                   |                   |                           |          |           |           |           |
| <b><u>Cartesian co-ordinate</u></b> |                   | <b><u>Frequencies</u></b> |          |           |           |           |
| -----<br>Atoms                      | X                 | Y                         | Z        |           |           |           |
| -----                               |                   |                           |          |           |           |           |
| C                                   | -1.00639          | -2.92739                  | -0.22786 | 14.6685   | 44.7163   | 47.4100   |
| C                                   | -1.44683          | -2.59738                  | 1.00041  | 67.9817   | 76.0388   | 86.3552   |
| Pt                                  | -1.54154          | -0.41062                  | -0.51170 | 91.8680   | 99.8159   | 105.6784  |
| Cl                                  | -3.83058          | -0.64899                  | -0.08027 | 124.5404  | 134.1971  | 144.8381  |
| Cl                                  | 0.65221           | -0.32190                  | -1.54432 | 149.1115  | 159.2624  | 169.5988  |
| H                                   | -0.73699          | -2.34657                  | 1.78374  | 186.0188  | 192.8834  | 201.4642  |
| H                                   | -2.50190          | -2.63387                  | 1.25091  | 214.2996  | 228.3859  | 237.7490  |
| H                                   | -1.69645          | -3.26428                  | -0.99899 | 255.6057  | 268.8199  | 272.2843  |
| H                                   | 0.05604           | -2.93393                  | -0.45315 | 287.9075  | 297.4135  | 305.7184  |
| Cl                                  | 3.44003           | 1.55436                   | -1.48259 | 331.2298  | 336.0700  | 359.5856  |
| Cl                                  | 1.83088           | -1.68074                  | 1.56630  | 396.0639  | 436.6850  | 454.3758  |
| H                                   | 5.28529           | -0.14113                  | -0.16473 | 524.0818  | 573.2989  | 617.1500  |
| C                                   | 4.67853           | -0.38931                  | 0.70004  | 628.0824  | 656.1536  | 681.7741  |
| C                                   | 4.11597           | 0.60764                   | 1.46233  | 809.6157  | 831.1665  | 836.6927  |
| H                                   | 4.65356           | -1.42109                  | 1.03688  | 845.8834  | 862.4710  | 880.9396  |
| H                                   | 3.64663           | 0.37240                   | 2.41248  | 923.0933  | 956.7357  | 1008.3958 |
| H                                   | 4.27729           | 1.65034                   | 1.20865  | 1034.9491 | 1037.2913 | 1045.4343 |
| C                                   | -1.22429          | 2.25603                   | -0.00714 | 1046.0844 | 1050.1643 | 1064.4445 |
| O                                   | 0.25703           | 0.88937                   | 1.32781  | 1072.2125 | 1086.5344 | 1107.0260 |
| C                                   | -1.00916          | 1.11107                   | 0.97225  | 1135.4444 | 1165.1091 | 1190.1482 |
| C                                   | -1.84590          | 1.48237                   | -1.18188 | 1203.2604 | 1237.5631 | 1241.4216 |
| H                                   | -2.91805          | 1.64250                   | -1.29969 | 1245.3114 | 1281.4793 | 1300.6496 |
| H                                   | -1.30518          | 1.59614                   | -2.12077 | 1320.9807 | 1327.7416 | 1331.1166 |
| H                                   | 0.38023           | 0.07638                   | 1.85864  | 1359.1300 | 1369.3900 | 1371.8507 |
| C                                   | -2.07786          | 1.16194                   | 2.06172  | 1435.8885 | 1459.8824 | 1462.2681 |
| H                                   | -2.54518          | 0.20034                   | 2.27790  | 1469.8703 | 1484.4886 | 1502.1874 |
| C                                   | -3.05863          | 2.24210                   | 1.57754  | 1529.8508 | 1607.8417 | 1671.4064 |
| H                                   | -3.83768          | 1.78193                   | 0.96554  | 3074.9155 | 3083.9500 | 3122.0446 |
| H                                   | -3.54343          | 2.75056                   | 2.41316  | 3126.8966 | 3136.0820 | 3146.8285 |
| C                                   | -2.19114          | 3.19081                   | 0.72997  | 3164.3158 | 3167.4432 | 3176.5045 |
| H                                   | -2.77734          | 3.80154                   | 0.03868  | 3178.3322 | 3181.2488 | 3194.8258 |
| H                                   | -1.62104          | 3.86587                   | 1.37770  | 3211.0400 | 3268.5538 | 3282.1436 |
| H                                   | -1.54481          | 1.50118                   | 2.95928  | 3287.2791 | 3304.4523 | 3624.3096 |

|   |          |          |          |  |
|---|----------|----------|----------|--|
| H | -0.26701 | 2.70443  | -0.28448 |  |
|   | 2.60871  | -0.05355 | -0.02828 |  |

**Statistical Thermodynamic Analysis**

Temperature=298.15 K

Pressure=1 atm

Zero-point correction= 0.269721

Electronic Energy = -2553.29416455

Internal Energy (E)= -2553.00070855

Enthalpy (H)= -2552.99976355

Gibbs Free Energy (G)=-2553.08008755

Gibbs Free Energy of Solvation=-2553.09687341



| St.Pt.                              | General Structure                                                                 | Ball & Stick model                                                                 |          |           |           |           |
|-------------------------------------|-----------------------------------------------------------------------------------|------------------------------------------------------------------------------------|----------|-----------|-----------|-----------|
| 1PdTS <sub>1</sub>                  | 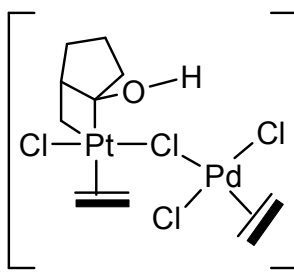 |  |          |           |           |           |
| <b><u>Cartesian co-ordinate</u></b> |                                                                                   | <b><u>Frequencies</u></b>                                                          |          |           |           |           |
| -----<br>Atoms                      | X                                                                                 | Y                                                                                  | Z        | -----     | -----     | -----     |
| -----                               | -----                                                                             | -----                                                                              | -----    | -----     | -----     | -----     |
| C                                   | -0.93837                                                                          | -2.95093                                                                           | 0.29578  | -415.3168 | 34.1558   | 43.5094   |
| C                                   | -0.86730                                                                          | -2.25264                                                                           | 1.44587  | 57.8161   | 68.0117   | 79.2132   |
| Pt                                  | -1.53575                                                                          | -0.54490                                                                           | -0.40257 | 84.4533   | 95.0319   | 114.6458  |
| Cl                                  | -3.73024                                                                          | -0.80946                                                                           | 0.35065  | 121.7297  | 127.9008  | 143.5888  |
| Cl                                  | 0.54546                                                                           | -0.46839                                                                           | -1.60693 | 148.2554  | 152.5157  | 167.6906  |
| H                                   | 0.08610                                                                           | -1.85949                                                                           | 1.78791  | 176.1466  | 180.9581  | 185.7458  |
| H                                   | -1.74437                                                                          | -2.11914                                                                           | 2.07360  | 196.8499  | 215.5786  | 240.4237  |
| H                                   | -1.87129                                                                          | -3.41011                                                                           | -0.02459 | 250.9521  | 281.9512  | 287.8531  |
| H                                   | -0.04024                                                                          | -3.12933                                                                           | -0.29021 | 291.8849  | 298.3860  | 306.7845  |
| Cl                                  | 2.50884                                                                           | 2.33662                                                                            | -0.61500 | 314.7967  | 325.6339  | 339.0302  |
| Cl                                  | 2.54901                                                                           | -2.20687                                                                           | 0.62438  | 372.3674  | 418.6050  | 431.5147  |
| H                                   | 4.97254                                                                           | 0.86855                                                                            | -0.60564 | 436.0198  | 553.6261  | 579.0443  |
| C                                   | 4.68552                                                                           | 0.09759                                                                            | 0.10274  | 635.1718  | 636.4543  | 660.8598  |
| C                                   | 4.15210                                                                           | 0.44080                                                                            | 1.32863  | 811.1842  | 836.7442  | 840.7638  |
| H                                   | 4.97987                                                                           | -0.92705                                                                           | -0.10082 | 845.4843  | 855.7679  | 881.3622  |
| H                                   | 4.03358                                                                           | -0.31186                                                                           | 2.10131  | 924.5992  | 953.9587  | 1005.2598 |
| H                                   | 4.03326                                                                           | 1.48624                                                                            | 1.59415  | 1029.0086 | 1034.3609 | 1039.9948 |
| C                                   | -1.18507                                                                          | 2.10057                                                                            | -0.37875 | 1046.2548 | 1047.0846 | 1058.5885 |
| O                                   | 0.26299                                                                           | 0.75235                                                                            | 1.21651  | 1066.4631 | 1085.7400 | 1095.8462 |
| C                                   | -1.00037                                                                          | 1.09578                                                                            | 0.77029  | 1142.8848 | 1148.6410 | 1179.7787 |
| C                                   | -1.97281                                                                          | 1.20106                                                                            | -1.34462 | 1197.8317 | 1240.4738 | 1242.3458 |
| H                                   | -3.05223                                                                          | 1.35168                                                                            | -1.32705 | 1244.8711 | 1250.3469 | 1284.3198 |
| H                                   | -1.57155                                                                          | 1.15500                                                                            | -2.35589 | 1292.8113 | 1322.6242 | 1332.6765 |
| H                                   | 0.56000                                                                           | 1.41188                                                                            | 1.86066  | 1337.8153 | 1368.1042 | 1372.3778 |
| C                                   | -1.98144                                                                          | 1.46808                                                                            | 1.88173  | 1374.2001 | 1457.3388 | 1465.8580 |
| H                                   | -2.48071                                                                          | 0.61144                                                                            | 2.33432  | 1475.9753 | 1476.4635 | 1500.0498 |
| C                                   | -2.91781                                                                          | 2.50751                                                                            | 1.25630  | 1522.4570 | 1600.3870 | 1667.2501 |
| H                                   | -3.75206                                                                          | 2.00218                                                                            | 0.76159  | 3038.7897 | 3076.4788 | 3116.8404 |
| H                                   | -3.33544                                                                          | 3.18471                                                                            | 2.00397  | 3128.8108 | 3141.4874 | 3149.9291 |
| C                                   | -2.02368                                                                          | 3.22795                                                                            | 0.23192  | 3160.9210 | 3168.7664 | 3174.1551 |
| H                                   | -2.59042                                                                          | 3.77344                                                                            | -0.52716 | 3174.8833 | 3183.3698 | 3187.0787 |
| H                                   | -1.36611                                                                          | 3.94372                                                                            | 0.73865  | 3215.3388 | 3262.2188 | 3284.1352 |
| H                                   | -1.37137                                                                          | 1.94716                                                                            | 2.66246  | 3285.1608 | 3301.0423 | 3826.2371 |

|   |                     |                    |                      |  |
|---|---------------------|--------------------|----------------------|--|
| H | -0.21967<br>2.49713 | 2.39612<br>0.04372 | -0.79678<br>-0.05575 |  |
|---|---------------------|--------------------|----------------------|--|

**Statistical Thermodynamic Analysis**

Temperature=298.15 K

Pressure=1 atm

Zero-point correction= 0.268567

Electronic Energy = -2553.27977345

Internal Energy (E)= -2552.98795045

Enthalpy (H)= -2552.98700645

Gibbs Free Energy (G)=-2553.06530645

Gibbs Free Energy of Solvation=-2553.08421885

| St.Pt.                              | General Structure                                                                 | Ball & Stick model                                                                 |          |           |           |           |
|-------------------------------------|-----------------------------------------------------------------------------------|------------------------------------------------------------------------------------|----------|-----------|-----------|-----------|
| 1PdI <sub>2</sub>                   | 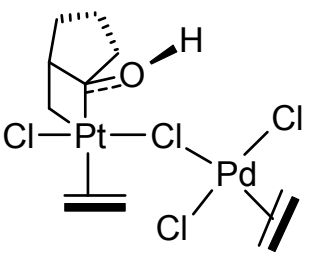 |  |          |           |           |           |
| <b><u>Cartesian co-ordinate</u></b> |                                                                                   | <b><u>Frequencies</u></b>                                                          |          |           |           |           |
| -----<br>Atoms                      | X                                                                                 | Y                                                                                  | Z        |           |           |           |
| -----                               |                                                                                   |                                                                                    |          |           |           |           |
| C                                   | -0.47189                                                                          | -2.81320                                                                           | 0.58656  | 27.9465   | 37.8830   | 50.7394   |
| C                                   | -0.32507                                                                          | -1.91266                                                                           | 1.58073  | 64.5516   | 73.9943   | 76.3504   |
| Pt                                  | -1.42733                                                                          | -0.67378                                                                           | -0.33009 | 96.9931   | 112.4180  | 117.4425  |
| Cl                                  | -3.52122                                                                          | -1.35722                                                                           | 0.43555  | 134.0851  | 140.0213  | 144.1941  |
| Cl                                  | 0.65785                                                                           | -0.25341                                                                           | -1.52844 | 150.1906  | 154.7064  | 160.8227  |
| H                                   | 0.61568                                                                           | -1.38316                                                                           | 1.70961  | 170.8864  | 174.1955  | 179.1997  |
| H                                   | -1.10174                                                                          | -1.76503                                                                           | 2.32573  | 184.3879  | 228.3377  | 232.5281  |
| H                                   | -1.37618                                                                          | -3.41003                                                                           | 0.50577  | 262.0085  | 271.3646  | 277.3534  |
| H                                   | 0.34848                                                                           | -3.01138                                                                           | -0.09857 | 288.6447  | 293.5089  | 296.5670  |
| Cl                                  | 2.24253                                                                           | 2.50159                                                                            | -0.36176 | 334.0034  | 335.7746  | 359.1489  |
| Cl                                  | 3.01122                                                                           | -2.11845                                                                           | 0.18347  | 380.5767  | 453.8271  | 467.5324  |
| H                                   | 4.96115                                                                           | 1.49062                                                                            | -0.07515 | 514.2634  | 573.2942  | 593.7498  |
| C                                   | 4.74977                                                                           | 0.56327                                                                            | 0.44879  | 623.5686  | 664.7249  | 781.4769  |
| C                                   | 3.99962                                                                           | 0.56701                                                                            | 1.59777  | 809.6436  | 835.5642  | 839.5277  |
| H                                   | 5.26183                                                                           | -0.33906                                                                           | 0.12909  | 841.8084  | 856.9690  | 875.7912  |
| H                                   | 3.91397                                                                           | -0.33215                                                                           | 2.19979  | 917.7346  | 954.7105  | 1008.9354 |
| H                                   | 3.60949                                                                           | 1.49797                                                                            | 1.99758  | 1031.4952 | 1037.3954 | 1038.0006 |
| C                                   | -1.82132                                                                          | 2.03393                                                                            | -0.58513 | 1046.8139 | 1053.7263 | 1059.1719 |
| O                                   | -0.15376                                                                          | 1.48332                                                                            | 1.19582  | 1061.5225 | 1078.7599 | 1100.7504 |
| C                                   | -1.36912                                                                          | 1.37802                                                                            | 0.71470  | 1146.2117 | 1176.9389 | 1182.5697 |
| C                                   | -2.23735                                                                          | 0.81496                                                                            | -1.43387 | 1202.1649 | 1239.6052 | 1243.2598 |
| H                                   | -3.31847                                                                          | 0.68600                                                                            | -1.49596 | 1249.1325 | 1289.3583 | 1311.3685 |
| H                                   | -1.77881                                                                          | 0.80884                                                                            | -2.42323 | 1323.0304 | 1329.4940 | 1334.5374 |
| H                                   | 0.50151                                                                           | 1.81909                                                                            | 0.53255  | 1359.9890 | 1369.3363 | 1394.6417 |
| C                                   | -2.48145                                                                          | 1.44913                                                                            | 1.74657  | 1461.9413 | 1464.1625 | 1465.7602 |
| H                                   | -2.69748                                                                          | 0.49853                                                                            | 2.23292  | 1474.0057 | 1500.0238 | 1507.9782 |
| C                                   | -3.66655                                                                          | 2.05553                                                                            | 0.98139  | 1521.5872 | 1611.5643 | 1663.4185 |
| H                                   | -4.27376                                                                          | 1.25505                                                                            | 0.55191  | 3087.0446 | 3088.2955 | 3117.1401 |
| H                                   | -4.30708                                                                          | 2.65249                                                                            | 1.63310  | 3119.9218 | 3123.5341 | 3146.2623 |
| C                                   | -3.00710                                                                          | 2.89631                                                                            | -0.12726 | 3167.1347 | 3174.0274 | 3174.6310 |
| H                                   | -3.68295                                                                          | 3.12039                                                                            | -0.95643 | 3180.0248 | 3184.5271 | 3191.2706 |
| H                                   | -2.64106                                                                          | 3.84500                                                                            | 0.28077  | 3198.3039 | 3263.8241 | 3281.0362 |
|                                     |                                                                                   |                                                                                    |          | 3281.3894 | 3301.3375 | 3327.5760 |

|   |          |         |          |  |
|---|----------|---------|----------|--|
| H | -2.10306 | 2.14607 | 2.50433  |  |
| H | -1.00030 | 2.58648 | -1.05278 |  |
|   | 2.62558  | 0.15643 | -0.12548 |  |

**Statistical Thermodynamic Analysis**

Temperature=298.15 K

Pressure=1 atm

Zero-point correction= 0.269190

Electronic Energy = -2553.30283733

Internal Energy (E)= -2553.00985033

Enthalpy (H)= -2553.00890633

Gibbs Free Energy (G)=-2553.08898233

Gibbs Free Energy of Solvation=-2553.10441906

| St.Pt.                              | General Structure                                                                 | Ball & Stick model                                                                 |          |           |           |           |
|-------------------------------------|-----------------------------------------------------------------------------------|------------------------------------------------------------------------------------|----------|-----------|-----------|-----------|
| 1PdI <sub>3</sub>                   | 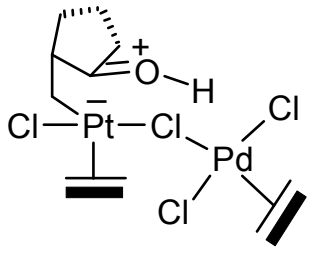 |  |          |           |           |           |
| <b><u>Cartesian co-ordinate</u></b> |                                                                                   | <b><u>Frequencies</u></b>                                                          |          |           |           |           |
| -----<br>Atoms                      | X                                                                                 | Y                                                                                  | Z        |           |           |           |
| -----                               |                                                                                   |                                                                                    |          |           |           |           |
| C                                   | -0.58428                                                                          | -3.16525                                                                           | 0.13482  | 22.8944   | 37.5820   | 50.8590   |
| C                                   | -0.76544                                                                          | -2.52966                                                                           | -1.04976 | 56.6938   | 60.5876   | 70.3776   |
| Pt                                  | 0.97037                                                                           | -1.33953                                                                           | 0.14720  | 81.7779   | 85.2731   | 105.6637  |
| Cl                                  | 2.47383                                                                           | -2.41180                                                                           | -1.27529 | 119.0624  | 125.6906  | 130.2316  |
| Cl                                  | -0.53305                                                                          | -0.09294                                                                           | 1.69453  | 147.3536  | 159.5388  | 170.4207  |
| H                                   | -1.58040                                                                          | -1.82173                                                                           | -1.16982 | 172.6262  | 185.1624  | 197.0658  |
| H                                   | -0.19781                                                                          | -2.80556                                                                           | -1.93197 | 197.3972  | 218.1678  | 223.0402  |
| H                                   | 0.12549                                                                           | -3.98142                                                                           | 0.22845  | 229.1925  | 242.4963  | 273.1009  |
| H                                   | -1.24166                                                                          | -2.95949                                                                           | 0.97560  | 282.9191  | 294.5421  | 321.5958  |
| Cl                                  | -3.61079                                                                          | -0.99256                                                                           | 0.67977  | 328.6451  | 333.0827  | 348.5229  |
| Cl                                  | -0.76411                                                                          | 2.45416                                                                            | -0.83519 | 393.4455  | 450.8752  | 529.7685  |
| H                                   | -3.75627                                                                          | -0.13657                                                                           | -2.02545 | 543.4863  | 570.0722  | 609.2687  |
| C                                   | -3.34607                                                                          | 0.86016                                                                            | -1.89600 | 618.8878  | 660.1355  | 728.1580  |
| C                                   | -3.89000                                                                          | 1.71759                                                                            | -0.96883 | 790.2464  | 836.1154  | 853.9326  |
| H                                   | -2.61328                                                                          | 1.21802                                                                            | -2.61250 | 864.4793  | 898.8099  | 915.6935  |
| H                                   | -3.59102                                                                          | 2.76087                                                                            | -0.94441 | 942.0169  | 977.3220  | 1018.1894 |
| H                                   | -4.73040                                                                          | 1.40496                                                                            | -0.35714 | 1021.8361 | 1025.3511 | 1039.6410 |
| C                                   | 2.38543                                                                           | 1.27879                                                                            | -0.04996 | 1041.4716 | 1060.7607 | 1065.2529 |
| O                                   | 1.07692                                                                           | 2.35309                                                                            | 1.73115  | 1073.5776 | 1096.5153 | 1122.2863 |
| C                                   | 1.86856                                                                           | 2.41167                                                                            | 0.75292  | 1160.0859 | 1190.3618 | 1202.7178 |
| C                                   | 2.47446                                                                           | -0.07962                                                                           | 0.66058  | 1214.7992 | 1239.1917 | 1246.4297 |
| H                                   | 1.66167                                                                           | 1.23757                                                                            | -0.88575 | 1247.8804 | 1280.5387 | 1314.8863 |
| H                                   | 3.41793                                                                           | -0.54863                                                                           | 0.37376  | 1320.6962 | 1331.2317 | 1332.4112 |
| H                                   | 2.48887                                                                           | 0.05128                                                                            | 1.75090  | 1352.4953 | 1357.8777 | 1434.9320 |
| C                                   | 3.68343                                                                           | 1.88309                                                                            | -0.63249 | 1457.8400 | 1465.2906 | 1470.1439 |
| C                                   | 3.31872                                                                           | 3.35517                                                                            | -0.87542 | 1483.1900 | 1505.5798 | 1519.8994 |
| C                                   | 2.47557                                                                           | 3.71252                                                                            | 0.35923  | 1610.0536 | 1648.5932 | 1703.7619 |
| H                                   | 0.62092                                                                           | 1.45074                                                                            | 1.82446  | 2915.0435 | 3004.5179 | 3059.1202 |
| H                                   | 3.98980                                                                           | 1.34794                                                                            | -1.53204 | 3069.1410 | 3084.5536 | 3105.5960 |
| H                                   | 3.10559                                                                           | 4.02832                                                                            | 1.20281  | 3151.7340 | 3157.8558 | 3166.5952 |
| H                                   | 1.69950                                                                           | 4.47070                                                                            | 0.22654  | 3171.3615 | 3172.3732 | 3188.5514 |
| H                                   | 4.18659                                                                           | 4.00556                                                                            | -0.98931 | 3191.8724 | 3196.6388 | 3268.5354 |
| H                                   | 2.70341                                                                           | 3.44389                                                                            | -1.77583 | 3291.8635 | 3292.9221 | 3307.9615 |
| H                                   | 4.48977                                                                           | 1.79638                                                                            | 0.10551  |           |           |           |
|                                     | -2.16142                                                                          | 0.69049                                                                            | -0.01935 |           |           |           |

**Statistical Thermodynamic Analysis**

Temperature=298.15 K

Pressure=1 atm

Zero-point correction= 0.268610

Electronic Energy = -2553.30177525

Internal Energy (E)= -2553.00919425

Enthalpy (H)= -2553.00825025

Gibbs Free Energy (G)=-2553.08966225

Gibbs Free Energy of Solvation=-2553.10892561

| St.Pt.                              | General Structure                                                                 | Ball & Stick model                                                                 |          |           |           |           |
|-------------------------------------|-----------------------------------------------------------------------------------|------------------------------------------------------------------------------------|----------|-----------|-----------|-----------|
| 1PdTS <sub>3</sub>                  | 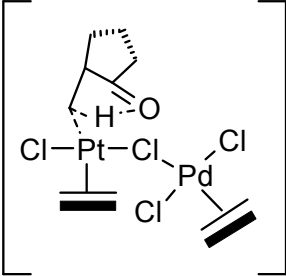 |  |          |           |           |           |
| <b><u>Cartesian co-ordinate</u></b> |                                                                                   | <b><u>Frequencies</u></b>                                                          |          |           |           |           |
| -----<br>Atoms                      | X                                                                                 | Y                                                                                  | Z        |           |           |           |
| -----                               |                                                                                   |                                                                                    |          |           |           |           |
| C                                   | 2.39847                                                                           | -2.25633                                                                           | -0.89950 | -783.3486 | 26.0416   | 31.3910   |
| C                                   | 3.05823                                                                           | -1.25573                                                                           | -1.55908 | 41.4196   | 44.6664   | 58.8061   |
| Pt                                  | 1.60554                                                                           | -0.24566                                                                           | -0.05948 | 70.8677   | 83.4842   | 89.8655   |
| Cl                                  | 3.31435                                                                           | -0.22536                                                                           | 1.51550  | 95.6029   | 102.0107  | 124.2734  |
| Cl                                  | -0.17798                                                                          | -0.28596                                                                           | -1.69975 | 129.2112  | 141.1384  | 155.5134  |
| H                                   | 2.70686                                                                           | -0.89831                                                                           | -2.52252 | 157.9032  | 163.8881  | 165.6311  |
| H                                   | 4.02006                                                                           | -0.89539                                                                           | -1.20855 | 172.7229  | 187.1745  | 213.0425  |
| H                                   | 2.82346                                                                           | -2.70941                                                                           | -0.00866 | 244.2388  | 258.5807  | 266.2829  |
| H                                   | 1.50616                                                                           | -2.71215                                                                           | -1.31647 | 269.2421  | 279.8245  | 291.7030  |
| Cl                                  | -0.52556                                                                          | -2.66716                                                                           | 0.77717  | 317.1827  | 330.4031  | 348.3508  |
| Cl                                  | -3.40047                                                                          | 0.65222                                                                            | -0.91945 | 380.6908  | 391.7318  | 448.1101  |
| H                                   | -3.37564                                                                          | -3.15082                                                                           | 0.68064  | 559.7412  | 576.3114  | 592.7592  |
| C                                   | -3.71214                                                                          | -2.11866                                                                           | 0.68912  | 603.2646  | 609.4299  | 613.6364  |
| C                                   | -3.26667                                                                          | -1.24950                                                                           | 1.65501  | 741.1407  | 810.7433  | 845.7274  |
| H                                   | -4.51514                                                                          | -1.82994                                                                           | 0.01787  | 846.8753  | 861.3757  | 904.0585  |
| H                                   | -3.71680                                                                          | -0.26709                                                                           | 1.75719  | 928.5135  | 956.9582  | 968.7500  |
| H                                   | -2.57475                                                                          | -1.58820                                                                           | 2.41994  | 1021.3391 | 1036.8036 | 1040.8563 |
| C                                   | -0.39596                                                                          | 2.20586                                                                            | 0.52694  | 1052.3197 | 1054.5058 | 1061.8540 |
| O                                   | 1.50463                                                                           | 2.91943                                                                            | -0.73050 | 1064.0057 | 1065.8941 | 1091.1120 |
| C                                   | 0.39200                                                                           | 3.18273                                                                            | -0.31572 | 1145.6945 | 1179.1971 | 1191.8308 |
| C                                   | 0.54701                                                                           | 1.20468                                                                            | 1.15656  | 1202.7767 | 1211.5989 | 1238.1533 |
| H                                   | 1.22094                                                                           | 1.65863                                                                            | 1.88658  | 1238.9605 | 1243.2536 | 1309.1884 |
| H                                   | 0.01735                                                                           | 0.37853                                                                            | 1.64611  | 1315.3600 | 1324.4285 | 1334.8603 |
| C                                   | -0.35273                                                                          | 4.49425                                                                            | -0.42252 | 1343.9289 | 1353.8158 | 1394.1270 |
| H                                   | 0.29861                                                                           | 5.27246                                                                            | -0.00944 | 1455.0470 | 1461.0737 | 1466.0222 |
| C                                   | -1.61386                                                                          | 4.26640                                                                            | 0.43152  | 1477.1072 | 1498.9973 | 1513.4157 |
| H                                   | -1.94575                                                                          | 5.17316                                                                            | 0.93941  | 1526.5149 | 1611.8538 | 1627.0631 |
| H                                   | -2.43363                                                                          | 3.91276                                                                            | -0.20110 | 1876.2284 | 3067.8739 | 3086.8306 |
| C                                   | -1.22547                                                                          | 3.14202                                                                            | 1.41560  | 3089.5213 | 3090.0774 | 3098.0358 |
| H                                   | -0.61066                                                                          | 3.53484                                                                            | 2.23476  | 3146.3913 | 3153.5597 | 3163.0890 |
| H                                   | -2.09683                                                                          | 2.64323                                                                            | 1.84506  | 3167.0489 | 3180.7690 | 3182.5094 |
| H                                   | -0.54450                                                                          | 4.75109                                                                            | -1.46705 | 3191.6290 | 3195.3969 | 3280.0725 |
| H                                   | -1.09807                                                                          | 1.71578                                                                            | -0.16330 | 3284.1423 | 3300.8720 | 3302.2616 |
| H                                   | 1.54915                                                                           | 1.40176                                                                            | -0.00463 |           |           |           |

|                                                  |                                               |          |  |
|--------------------------------------------------|-----------------------------------------------|----------|--|
| -1.95759                                         | -1.02897                                      | -0.14258 |  |
| <b><u>Statistical Thermodynamic Analysis</u></b> |                                               |          |  |
| Temperature=298.15 K                             | Pressure=1 atm                                |          |  |
| Zero-point correction= 0.263150                  | Electronic Energy = -2553.27564186            |          |  |
| Internal Energy (E)= -2552.98846286              | Enthalpy (H)= -2552.98751886                  |          |  |
| Gibbs Free Energy (G)=-2553.06963186             | Gibbs Free Energy of Solvation=-2553.08581068 |          |  |



| St.Pt.                              | General Structure | Ball & Stick model        |          |           |           |           |
|-------------------------------------|-------------------|---------------------------|----------|-----------|-----------|-----------|
| 1PdL4                               |                   |                           |          |           |           |           |
| <b><u>Cartesian co-ordinate</u></b> |                   | <b><u>Frequencies</u></b> |          |           |           |           |
| Atoms                               | X                 | Y                         | Z        | 25.0479   | 28.0500   | 33.8876   |
| C                                   | 3.20746           | -0.46697                  | -1.66834 | 38.7417   | 53.4279   | 68.6776   |
| C                                   | 2.82247           | 0.86510                   | -1.46864 | 72.4284   | 82.3275   | 90.1415   |
| Pt                                  | 1.73953           | -0.39826                  | -0.13387 | 94.7684   | 95.5363   | 116.8115  |
| Cl                                  | 3.40779           | -0.15554                  | 1.44448  | 125.7887  | 129.3804  | 132.7686  |
| Cl                                  | -0.09325          | -0.65292                  | -1.72679 | 145.8604  | 164.4344  | 173.6736  |
| H                                   | 2.08794           | 1.34198                   | -2.10839 | 175.6003  | 196.3547  | 200.0018  |
| H                                   | 3.42427           | 1.52128                   | -0.84802 | 228.2538  | 249.2636  | 252.5266  |
| H                                   | 4.11559           | -0.84912                  | -1.21310 | 266.3537  | 276.9820  | 280.8453  |
| H                                   | 2.78590           | -1.04204                  | -2.48796 | 339.6083  | 347.7664  | 354.0082  |
| Cl                                  | 0.12970           | -1.25389                  | 1.57243  | 383.8375  | 406.9343  | 458.4644  |
| Cl                                  | -3.49880          | -0.80954                  | -1.44254 | 506.0736  | 560.1126  | 579.7407  |
| H                                   | -2.41588          | -2.76943                  | 1.99325  | 596.1326  | 600.1567  | 723.9408  |
| C                                   | -3.10016          | -2.12567                  | 1.44775  | 768.2732  | 819.6678  | 826.6137  |
| C                                   | -3.18295          | -0.78532                  | 1.73090  | 831.4410  | 869.5097  | 910.2046  |
| H                                   | -3.82053          | -2.59276                  | 0.78347  | 948.2073  | 958.8904  | 994.6287  |
| H                                   | -3.97510          | -0.18196                  | 1.29830  | 1029.9023 | 1038.5801 | 1039.9582 |
| H                                   | -2.56668          | -0.34026                  | 2.50767  | 1053.7851 | 1056.5217 | 1071.3981 |
| C                                   | -0.67936          | 2.40229                   | 0.97043  | 1075.5068 | 1095.2699 | 1164.0306 |
| O                                   | 0.61619           | 2.70711                   | -1.06017 | 1186.1987 | 1191.2846 | 1211.0160 |
| C                                   | -0.46345          | 2.62174                   | -0.52049 | 1219.9671 | 1233.9300 | 1244.4628 |
| C                                   | 0.49740           | 2.83623                   | 1.82574  | 1291.8833 | 1302.3663 | 1306.0902 |
| H                                   | 0.66787           | 3.91240                   | 1.72361  | 1324.8629 | 1335.7615 | 1346.8180 |
| H                                   | 0.32124           | 2.61043                   | 2.88019  | 1380.9379 | 1423.3160 | 1458.4287 |
| C                                   | -1.81626          | 2.77452                   | -1.20521 | 1465.0874 | 1475.3144 | 1500.0123 |
| H                                   | -1.81778          | 3.73028                   | -1.73969 | 1503.2242 | 1504.9006 | 1516.7071 |
| C                                   | -2.84368          | 2.72814                   | -0.06311 | 1574.9565 | 1612.0848 | 1885.0299 |
| H                                   | -3.68604          | 3.40401                   | -0.22253 | 3034.5081 | 3067.6455 | 3069.4569 |
| H                                   | -3.25176          | 1.71453                   | 0.01360  | 3084.1107 | 3093.8213 | 3127.2348 |
| C                                   | -2.03794          | 3.07075                   | 1.20575  | 3133.4780 | 3148.3352 | 3149.8643 |
| H                                   | -1.89665          | 4.15637                   | 1.28550  | 3159.0431 | 3174.8197 | 3174.9158 |
|                                     |                   |                           |          | 3181.0394 | 3199.5893 | 3273.6009 |
|                                     |                   |                           |          | 3274.5916 | 3292.0457 | 3304.4308 |

|   |          |          |          |
|---|----------|----------|----------|
| H | -2.52446 | 2.73627  | 2.12640  |
| H | -1.94784 | 1.98173  | -1.94923 |
| H | -0.81960 | 1.31253  | 1.07819  |
| H | 1.40884  | 2.31820  | 1.51210  |
|   | -1.74339 | -1.04913 | 0.02941  |

**Statistical Thermodynamic Analysis**

Temperature=298.15 K

Pressure=1 atm

Zero-point correction= 0.268013

Electronic Energy = -2553.33572097

Internal Energy (E)= -2553.04277497

Enthalpy (H)= -2553.04182997

Gibbs Free Energy (G)=-2553.12679597

Gibbs Free Energy of Solvation=-2553.14341841

| St.Pt.                                                                                                                                                                                                                                                                                                                                                                                                                                                                                                                                                                                                                                                                                                                                                                                                                                                                                                                                                                                                                                                                                                                                                                                                                                                                                                                                                                                                                        | General Structure                                                                 | Ball & Stick model                                                                 |                      |                |                                 |                                    |                                     |                              |                                      |                                               |         |         |          |   |         |         |         |   |         |          |         |   |          |          |         |   |         |          |         |   |         |         |         |   |          |         |         |   |         |         |         |   |          |         |         |   |          |         |         |   |          |         |          |   |          |          |          |   |          |          |          |   |          |          |          |   |          |         |          |   |         |          |          |                                                                                                                                                                                                                                                                                                                                                                                                                                                                                                                                                                                                                                                                                                                                                                                                                                                                                                                                                                                                                                                                                           |          |          |          |          |          |          |          |          |          |          |          |          |          |          |          |          |           |           |           |           |           |           |           |           |           |           |           |           |           |           |           |           |           |           |           |           |           |           |           |           |           |           |           |           |           |
|-------------------------------------------------------------------------------------------------------------------------------------------------------------------------------------------------------------------------------------------------------------------------------------------------------------------------------------------------------------------------------------------------------------------------------------------------------------------------------------------------------------------------------------------------------------------------------------------------------------------------------------------------------------------------------------------------------------------------------------------------------------------------------------------------------------------------------------------------------------------------------------------------------------------------------------------------------------------------------------------------------------------------------------------------------------------------------------------------------------------------------------------------------------------------------------------------------------------------------------------------------------------------------------------------------------------------------------------------------------------------------------------------------------------------------|-----------------------------------------------------------------------------------|------------------------------------------------------------------------------------|----------------------|----------------|---------------------------------|------------------------------------|-------------------------------------|------------------------------|--------------------------------------|-----------------------------------------------|---------|---------|----------|---|---------|---------|---------|---|---------|----------|---------|---|----------|----------|---------|---|---------|----------|---------|---|---------|---------|---------|---|----------|---------|---------|---|---------|---------|---------|---|----------|---------|---------|---|----------|---------|---------|---|----------|---------|----------|---|----------|----------|----------|---|----------|----------|----------|---|----------|----------|----------|---|----------|---------|----------|---|---------|----------|----------|-------------------------------------------------------------------------------------------------------------------------------------------------------------------------------------------------------------------------------------------------------------------------------------------------------------------------------------------------------------------------------------------------------------------------------------------------------------------------------------------------------------------------------------------------------------------------------------------------------------------------------------------------------------------------------------------------------------------------------------------------------------------------------------------------------------------------------------------------------------------------------------------------------------------------------------------------------------------------------------------------------------------------------------------------------------------------------------------|----------|----------|----------|----------|----------|----------|----------|----------|----------|----------|----------|----------|----------|----------|----------|----------|-----------|-----------|-----------|-----------|-----------|-----------|-----------|-----------|-----------|-----------|-----------|-----------|-----------|-----------|-----------|-----------|-----------|-----------|-----------|-----------|-----------|-----------|-----------|-----------|-----------|-----------|-----------|-----------|-----------|
| 1                                                                                                                                                                                                                                                                                                                                                                                                                                                                                                                                                                                                                                                                                                                                                                                                                                                                                                                                                                                                                                                                                                                                                                                                                                                                                                                                                                                                                             |  |  |                      |                |                                 |                                    |                                     |                              |                                      |                                               |         |         |          |   |         |         |         |   |         |          |         |   |          |          |         |   |         |          |         |   |         |         |         |   |          |         |         |   |         |         |         |   |          |         |         |   |          |         |         |   |          |         |          |   |          |          |          |   |          |          |          |   |          |          |          |   |          |         |          |   |         |          |          |                                                                                                                                                                                                                                                                                                                                                                                                                                                                                                                                                                                                                                                                                                                                                                                                                                                                                                                                                                                                                                                                                           |          |          |          |          |          |          |          |          |          |          |          |          |          |          |          |          |           |           |           |           |           |           |           |           |           |           |           |           |           |           |           |           |           |           |           |           |           |           |           |           |           |           |           |           |           |
| <p style="text-align: center;"><b><u>Cartesian co-ordinate</u></b></p> <table border="1"> <thead> <tr> <th>Atoms</th> <th>X</th> <th>Y</th> <th>Z</th> </tr> </thead> <tbody> <tr><td>C</td><td>-0.03028</td><td>-1.05068</td><td>-0.41217</td></tr> <tr><td>O</td><td>2.00227</td><td>0.38667</td><td>-0.52845</td></tr> <tr><td>C</td><td>0.74672</td><td>0.15044</td><td>0.02888</td></tr> <tr><td>C</td><td>0.57091</td><td>-1.00145</td><td>0.97587</td></tr> <tr><td>H</td><td>-0.07826</td><td>-0.90477</td><td>1.84133</td></tr> <tr><td>H</td><td>1.45155</td><td>-1.61605</td><td>1.12589</td></tr> <tr><td>H</td><td>2.55325</td><td>0.78977</td><td>0.15229</td></tr> <tr><td>C</td><td>-0.21550</td><td>1.31928</td><td>0.14884</td></tr> <tr><td>H</td><td>0.00395</td><td>1.98045</td><td>0.99447</td></tr> <tr><td>C</td><td>-1.60371</td><td>0.66350</td><td>0.25353</td></tr> <tr><td>H</td><td>-1.83307</td><td>0.43898</td><td>1.29968</td></tr> <tr><td>H</td><td>-2.40237</td><td>1.31192</td><td>-0.11380</td></tr> <tr><td>C</td><td>-1.48666</td><td>-0.64650</td><td>-0.55506</td></tr> <tr><td>H</td><td>-2.18673</td><td>-1.41105</td><td>-0.20396</td></tr> <tr><td>H</td><td>-1.70299</td><td>-0.45950</td><td>-1.61272</td></tr> <tr><td>H</td><td>-0.12787</td><td>1.90700</td><td>-0.77205</td></tr> <tr><td>H</td><td>0.41549</td><td>-1.73776</td><td>-1.12287</td></tr> </tbody> </table> |                                                                                   | Atoms                                                                              | X                    | Y              | Z                               | C                                  | -0.03028                            | -1.05068                     | -0.41217                             | O                                             | 2.00227 | 0.38667 | -0.52845 | C | 0.74672 | 0.15044 | 0.02888 | C | 0.57091 | -1.00145 | 0.97587 | H | -0.07826 | -0.90477 | 1.84133 | H | 1.45155 | -1.61605 | 1.12589 | H | 2.55325 | 0.78977 | 0.15229 | C | -0.21550 | 1.31928 | 0.14884 | H | 0.00395 | 1.98045 | 0.99447 | C | -1.60371 | 0.66350 | 0.25353 | H | -1.83307 | 0.43898 | 1.29968 | H | -2.40237 | 1.31192 | -0.11380 | C | -1.48666 | -0.64650 | -0.55506 | H | -2.18673 | -1.41105 | -0.20396 | H | -1.70299 | -0.45950 | -1.61272 | H | -0.12787 | 1.90700 | -0.77205 | H | 0.41549 | -1.73776 | -1.12287 | <p style="text-align: center;"><b><u>Frequencies</u></b></p> <table border="1"> <tbody> <tr><td>218.7186</td><td>249.7708</td><td>346.9290</td></tr> <tr><td>369.7460</td><td>389.5136</td><td>457.7402</td></tr> <tr><td>550.7976</td><td>618.5293</td><td>712.7037</td></tr> <tr><td>826.0150</td><td>847.4259</td><td>898.7741</td></tr> <tr><td>916.2375</td><td>921.1445</td><td>967.1094</td></tr> <tr><td>987.7957</td><td>1012.3285</td><td>1039.2903</td></tr> <tr><td>1065.7574</td><td>1099.6435</td><td>1125.4589</td></tr> <tr><td>1174.1473</td><td>1211.8734</td><td>1253.4906</td></tr> <tr><td>1274.9256</td><td>1290.3576</td><td>1330.2710</td></tr> <tr><td>1349.9471</td><td>1361.9481</td><td>1370.9121</td></tr> <tr><td>1425.9593</td><td>1501.3010</td><td>1506.3580</td></tr> <tr><td>1516.1429</td><td>1536.0356</td><td>3069.6620</td></tr> <tr><td>3076.7137</td><td>3096.2241</td><td>3117.9686</td></tr> <tr><td>3122.9285</td><td>3145.5093</td><td>3150.0545</td></tr> <tr><td>3221.3029</td><td>3241.3378</td><td>3880.0908</td></tr> </tbody> </table> | 218.7186 | 249.7708 | 346.9290 | 369.7460 | 389.5136 | 457.7402 | 550.7976 | 618.5293 | 712.7037 | 826.0150 | 847.4259 | 898.7741 | 916.2375 | 921.1445 | 967.1094 | 987.7957 | 1012.3285 | 1039.2903 | 1065.7574 | 1099.6435 | 1125.4589 | 1174.1473 | 1211.8734 | 1253.4906 | 1274.9256 | 1290.3576 | 1330.2710 | 1349.9471 | 1361.9481 | 1370.9121 | 1425.9593 | 1501.3010 | 1506.3580 | 1516.1429 | 1536.0356 | 3069.6620 | 3076.7137 | 3096.2241 | 3117.9686 | 3122.9285 | 3145.5093 | 3150.0545 | 3221.3029 | 3241.3378 | 3880.0908 |
| Atoms                                                                                                                                                                                                                                                                                                                                                                                                                                                                                                                                                                                                                                                                                                                                                                                                                                                                                                                                                                                                                                                                                                                                                                                                                                                                                                                                                                                                                         | X                                                                                 | Y                                                                                  | Z                    |                |                                 |                                    |                                     |                              |                                      |                                               |         |         |          |   |         |         |         |   |         |          |         |   |          |          |         |   |         |          |         |   |         |         |         |   |          |         |         |   |         |         |         |   |          |         |         |   |          |         |         |   |          |         |          |   |          |          |          |   |          |          |          |   |          |          |          |   |          |         |          |   |         |          |          |                                                                                                                                                                                                                                                                                                                                                                                                                                                                                                                                                                                                                                                                                                                                                                                                                                                                                                                                                                                                                                                                                           |          |          |          |          |          |          |          |          |          |          |          |          |          |          |          |          |           |           |           |           |           |           |           |           |           |           |           |           |           |           |           |           |           |           |           |           |           |           |           |           |           |           |           |           |           |
| C                                                                                                                                                                                                                                                                                                                                                                                                                                                                                                                                                                                                                                                                                                                                                                                                                                                                                                                                                                                                                                                                                                                                                                                                                                                                                                                                                                                                                             | -0.03028                                                                          | -1.05068                                                                           | -0.41217             |                |                                 |                                    |                                     |                              |                                      |                                               |         |         |          |   |         |         |         |   |         |          |         |   |          |          |         |   |         |          |         |   |         |         |         |   |          |         |         |   |         |         |         |   |          |         |         |   |          |         |         |   |          |         |          |   |          |          |          |   |          |          |          |   |          |          |          |   |          |         |          |   |         |          |          |                                                                                                                                                                                                                                                                                                                                                                                                                                                                                                                                                                                                                                                                                                                                                                                                                                                                                                                                                                                                                                                                                           |          |          |          |          |          |          |          |          |          |          |          |          |          |          |          |          |           |           |           |           |           |           |           |           |           |           |           |           |           |           |           |           |           |           |           |           |           |           |           |           |           |           |           |           |           |
| O                                                                                                                                                                                                                                                                                                                                                                                                                                                                                                                                                                                                                                                                                                                                                                                                                                                                                                                                                                                                                                                                                                                                                                                                                                                                                                                                                                                                                             | 2.00227                                                                           | 0.38667                                                                            | -0.52845             |                |                                 |                                    |                                     |                              |                                      |                                               |         |         |          |   |         |         |         |   |         |          |         |   |          |          |         |   |         |          |         |   |         |         |         |   |          |         |         |   |         |         |         |   |          |         |         |   |          |         |         |   |          |         |          |   |          |          |          |   |          |          |          |   |          |          |          |   |          |         |          |   |         |          |          |                                                                                                                                                                                                                                                                                                                                                                                                                                                                                                                                                                                                                                                                                                                                                                                                                                                                                                                                                                                                                                                                                           |          |          |          |          |          |          |          |          |          |          |          |          |          |          |          |          |           |           |           |           |           |           |           |           |           |           |           |           |           |           |           |           |           |           |           |           |           |           |           |           |           |           |           |           |           |
| C                                                                                                                                                                                                                                                                                                                                                                                                                                                                                                                                                                                                                                                                                                                                                                                                                                                                                                                                                                                                                                                                                                                                                                                                                                                                                                                                                                                                                             | 0.74672                                                                           | 0.15044                                                                            | 0.02888              |                |                                 |                                    |                                     |                              |                                      |                                               |         |         |          |   |         |         |         |   |         |          |         |   |          |          |         |   |         |          |         |   |         |         |         |   |          |         |         |   |         |         |         |   |          |         |         |   |          |         |         |   |          |         |          |   |          |          |          |   |          |          |          |   |          |          |          |   |          |         |          |   |         |          |          |                                                                                                                                                                                                                                                                                                                                                                                                                                                                                                                                                                                                                                                                                                                                                                                                                                                                                                                                                                                                                                                                                           |          |          |          |          |          |          |          |          |          |          |          |          |          |          |          |          |           |           |           |           |           |           |           |           |           |           |           |           |           |           |           |           |           |           |           |           |           |           |           |           |           |           |           |           |           |
| C                                                                                                                                                                                                                                                                                                                                                                                                                                                                                                                                                                                                                                                                                                                                                                                                                                                                                                                                                                                                                                                                                                                                                                                                                                                                                                                                                                                                                             | 0.57091                                                                           | -1.00145                                                                           | 0.97587              |                |                                 |                                    |                                     |                              |                                      |                                               |         |         |          |   |         |         |         |   |         |          |         |   |          |          |         |   |         |          |         |   |         |         |         |   |          |         |         |   |         |         |         |   |          |         |         |   |          |         |         |   |          |         |          |   |          |          |          |   |          |          |          |   |          |          |          |   |          |         |          |   |         |          |          |                                                                                                                                                                                                                                                                                                                                                                                                                                                                                                                                                                                                                                                                                                                                                                                                                                                                                                                                                                                                                                                                                           |          |          |          |          |          |          |          |          |          |          |          |          |          |          |          |          |           |           |           |           |           |           |           |           |           |           |           |           |           |           |           |           |           |           |           |           |           |           |           |           |           |           |           |           |           |
| H                                                                                                                                                                                                                                                                                                                                                                                                                                                                                                                                                                                                                                                                                                                                                                                                                                                                                                                                                                                                                                                                                                                                                                                                                                                                                                                                                                                                                             | -0.07826                                                                          | -0.90477                                                                           | 1.84133              |                |                                 |                                    |                                     |                              |                                      |                                               |         |         |          |   |         |         |         |   |         |          |         |   |          |          |         |   |         |          |         |   |         |         |         |   |          |         |         |   |         |         |         |   |          |         |         |   |          |         |         |   |          |         |          |   |          |          |          |   |          |          |          |   |          |          |          |   |          |         |          |   |         |          |          |                                                                                                                                                                                                                                                                                                                                                                                                                                                                                                                                                                                                                                                                                                                                                                                                                                                                                                                                                                                                                                                                                           |          |          |          |          |          |          |          |          |          |          |          |          |          |          |          |          |           |           |           |           |           |           |           |           |           |           |           |           |           |           |           |           |           |           |           |           |           |           |           |           |           |           |           |           |           |
| H                                                                                                                                                                                                                                                                                                                                                                                                                                                                                                                                                                                                                                                                                                                                                                                                                                                                                                                                                                                                                                                                                                                                                                                                                                                                                                                                                                                                                             | 1.45155                                                                           | -1.61605                                                                           | 1.12589              |                |                                 |                                    |                                     |                              |                                      |                                               |         |         |          |   |         |         |         |   |         |          |         |   |          |          |         |   |         |          |         |   |         |         |         |   |          |         |         |   |         |         |         |   |          |         |         |   |          |         |         |   |          |         |          |   |          |          |          |   |          |          |          |   |          |          |          |   |          |         |          |   |         |          |          |                                                                                                                                                                                                                                                                                                                                                                                                                                                                                                                                                                                                                                                                                                                                                                                                                                                                                                                                                                                                                                                                                           |          |          |          |          |          |          |          |          |          |          |          |          |          |          |          |          |           |           |           |           |           |           |           |           |           |           |           |           |           |           |           |           |           |           |           |           |           |           |           |           |           |           |           |           |           |
| H                                                                                                                                                                                                                                                                                                                                                                                                                                                                                                                                                                                                                                                                                                                                                                                                                                                                                                                                                                                                                                                                                                                                                                                                                                                                                                                                                                                                                             | 2.55325                                                                           | 0.78977                                                                            | 0.15229              |                |                                 |                                    |                                     |                              |                                      |                                               |         |         |          |   |         |         |         |   |         |          |         |   |          |          |         |   |         |          |         |   |         |         |         |   |          |         |         |   |         |         |         |   |          |         |         |   |          |         |         |   |          |         |          |   |          |          |          |   |          |          |          |   |          |          |          |   |          |         |          |   |         |          |          |                                                                                                                                                                                                                                                                                                                                                                                                                                                                                                                                                                                                                                                                                                                                                                                                                                                                                                                                                                                                                                                                                           |          |          |          |          |          |          |          |          |          |          |          |          |          |          |          |          |           |           |           |           |           |           |           |           |           |           |           |           |           |           |           |           |           |           |           |           |           |           |           |           |           |           |           |           |           |
| C                                                                                                                                                                                                                                                                                                                                                                                                                                                                                                                                                                                                                                                                                                                                                                                                                                                                                                                                                                                                                                                                                                                                                                                                                                                                                                                                                                                                                             | -0.21550                                                                          | 1.31928                                                                            | 0.14884              |                |                                 |                                    |                                     |                              |                                      |                                               |         |         |          |   |         |         |         |   |         |          |         |   |          |          |         |   |         |          |         |   |         |         |         |   |          |         |         |   |         |         |         |   |          |         |         |   |          |         |         |   |          |         |          |   |          |          |          |   |          |          |          |   |          |          |          |   |          |         |          |   |         |          |          |                                                                                                                                                                                                                                                                                                                                                                                                                                                                                                                                                                                                                                                                                                                                                                                                                                                                                                                                                                                                                                                                                           |          |          |          |          |          |          |          |          |          |          |          |          |          |          |          |          |           |           |           |           |           |           |           |           |           |           |           |           |           |           |           |           |           |           |           |           |           |           |           |           |           |           |           |           |           |
| H                                                                                                                                                                                                                                                                                                                                                                                                                                                                                                                                                                                                                                                                                                                                                                                                                                                                                                                                                                                                                                                                                                                                                                                                                                                                                                                                                                                                                             | 0.00395                                                                           | 1.98045                                                                            | 0.99447              |                |                                 |                                    |                                     |                              |                                      |                                               |         |         |          |   |         |         |         |   |         |          |         |   |          |          |         |   |         |          |         |   |         |         |         |   |          |         |         |   |         |         |         |   |          |         |         |   |          |         |         |   |          |         |          |   |          |          |          |   |          |          |          |   |          |          |          |   |          |         |          |   |         |          |          |                                                                                                                                                                                                                                                                                                                                                                                                                                                                                                                                                                                                                                                                                                                                                                                                                                                                                                                                                                                                                                                                                           |          |          |          |          |          |          |          |          |          |          |          |          |          |          |          |          |           |           |           |           |           |           |           |           |           |           |           |           |           |           |           |           |           |           |           |           |           |           |           |           |           |           |           |           |           |
| C                                                                                                                                                                                                                                                                                                                                                                                                                                                                                                                                                                                                                                                                                                                                                                                                                                                                                                                                                                                                                                                                                                                                                                                                                                                                                                                                                                                                                             | -1.60371                                                                          | 0.66350                                                                            | 0.25353              |                |                                 |                                    |                                     |                              |                                      |                                               |         |         |          |   |         |         |         |   |         |          |         |   |          |          |         |   |         |          |         |   |         |         |         |   |          |         |         |   |         |         |         |   |          |         |         |   |          |         |         |   |          |         |          |   |          |          |          |   |          |          |          |   |          |          |          |   |          |         |          |   |         |          |          |                                                                                                                                                                                                                                                                                                                                                                                                                                                                                                                                                                                                                                                                                                                                                                                                                                                                                                                                                                                                                                                                                           |          |          |          |          |          |          |          |          |          |          |          |          |          |          |          |          |           |           |           |           |           |           |           |           |           |           |           |           |           |           |           |           |           |           |           |           |           |           |           |           |           |           |           |           |           |
| H                                                                                                                                                                                                                                                                                                                                                                                                                                                                                                                                                                                                                                                                                                                                                                                                                                                                                                                                                                                                                                                                                                                                                                                                                                                                                                                                                                                                                             | -1.83307                                                                          | 0.43898                                                                            | 1.29968              |                |                                 |                                    |                                     |                              |                                      |                                               |         |         |          |   |         |         |         |   |         |          |         |   |          |          |         |   |         |          |         |   |         |         |         |   |          |         |         |   |         |         |         |   |          |         |         |   |          |         |         |   |          |         |          |   |          |          |          |   |          |          |          |   |          |          |          |   |          |         |          |   |         |          |          |                                                                                                                                                                                                                                                                                                                                                                                                                                                                                                                                                                                                                                                                                                                                                                                                                                                                                                                                                                                                                                                                                           |          |          |          |          |          |          |          |          |          |          |          |          |          |          |          |          |           |           |           |           |           |           |           |           |           |           |           |           |           |           |           |           |           |           |           |           |           |           |           |           |           |           |           |           |           |
| H                                                                                                                                                                                                                                                                                                                                                                                                                                                                                                                                                                                                                                                                                                                                                                                                                                                                                                                                                                                                                                                                                                                                                                                                                                                                                                                                                                                                                             | -2.40237                                                                          | 1.31192                                                                            | -0.11380             |                |                                 |                                    |                                     |                              |                                      |                                               |         |         |          |   |         |         |         |   |         |          |         |   |          |          |         |   |         |          |         |   |         |         |         |   |          |         |         |   |         |         |         |   |          |         |         |   |          |         |         |   |          |         |          |   |          |          |          |   |          |          |          |   |          |          |          |   |          |         |          |   |         |          |          |                                                                                                                                                                                                                                                                                                                                                                                                                                                                                                                                                                                                                                                                                                                                                                                                                                                                                                                                                                                                                                                                                           |          |          |          |          |          |          |          |          |          |          |          |          |          |          |          |          |           |           |           |           |           |           |           |           |           |           |           |           |           |           |           |           |           |           |           |           |           |           |           |           |           |           |           |           |           |
| C                                                                                                                                                                                                                                                                                                                                                                                                                                                                                                                                                                                                                                                                                                                                                                                                                                                                                                                                                                                                                                                                                                                                                                                                                                                                                                                                                                                                                             | -1.48666                                                                          | -0.64650                                                                           | -0.55506             |                |                                 |                                    |                                     |                              |                                      |                                               |         |         |          |   |         |         |         |   |         |          |         |   |          |          |         |   |         |          |         |   |         |         |         |   |          |         |         |   |         |         |         |   |          |         |         |   |          |         |         |   |          |         |          |   |          |          |          |   |          |          |          |   |          |          |          |   |          |         |          |   |         |          |          |                                                                                                                                                                                                                                                                                                                                                                                                                                                                                                                                                                                                                                                                                                                                                                                                                                                                                                                                                                                                                                                                                           |          |          |          |          |          |          |          |          |          |          |          |          |          |          |          |          |           |           |           |           |           |           |           |           |           |           |           |           |           |           |           |           |           |           |           |           |           |           |           |           |           |           |           |           |           |
| H                                                                                                                                                                                                                                                                                                                                                                                                                                                                                                                                                                                                                                                                                                                                                                                                                                                                                                                                                                                                                                                                                                                                                                                                                                                                                                                                                                                                                             | -2.18673                                                                          | -1.41105                                                                           | -0.20396             |                |                                 |                                    |                                     |                              |                                      |                                               |         |         |          |   |         |         |         |   |         |          |         |   |          |          |         |   |         |          |         |   |         |         |         |   |          |         |         |   |         |         |         |   |          |         |         |   |          |         |         |   |          |         |          |   |          |          |          |   |          |          |          |   |          |          |          |   |          |         |          |   |         |          |          |                                                                                                                                                                                                                                                                                                                                                                                                                                                                                                                                                                                                                                                                                                                                                                                                                                                                                                                                                                                                                                                                                           |          |          |          |          |          |          |          |          |          |          |          |          |          |          |          |          |           |           |           |           |           |           |           |           |           |           |           |           |           |           |           |           |           |           |           |           |           |           |           |           |           |           |           |           |           |
| H                                                                                                                                                                                                                                                                                                                                                                                                                                                                                                                                                                                                                                                                                                                                                                                                                                                                                                                                                                                                                                                                                                                                                                                                                                                                                                                                                                                                                             | -1.70299                                                                          | -0.45950                                                                           | -1.61272             |                |                                 |                                    |                                     |                              |                                      |                                               |         |         |          |   |         |         |         |   |         |          |         |   |          |          |         |   |         |          |         |   |         |         |         |   |          |         |         |   |         |         |         |   |          |         |         |   |          |         |         |   |          |         |          |   |          |          |          |   |          |          |          |   |          |          |          |   |          |         |          |   |         |          |          |                                                                                                                                                                                                                                                                                                                                                                                                                                                                                                                                                                                                                                                                                                                                                                                                                                                                                                                                                                                                                                                                                           |          |          |          |          |          |          |          |          |          |          |          |          |          |          |          |          |           |           |           |           |           |           |           |           |           |           |           |           |           |           |           |           |           |           |           |           |           |           |           |           |           |           |           |           |           |
| H                                                                                                                                                                                                                                                                                                                                                                                                                                                                                                                                                                                                                                                                                                                                                                                                                                                                                                                                                                                                                                                                                                                                                                                                                                                                                                                                                                                                                             | -0.12787                                                                          | 1.90700                                                                            | -0.77205             |                |                                 |                                    |                                     |                              |                                      |                                               |         |         |          |   |         |         |         |   |         |          |         |   |          |          |         |   |         |          |         |   |         |         |         |   |          |         |         |   |         |         |         |   |          |         |         |   |          |         |         |   |          |         |          |   |          |          |          |   |          |          |          |   |          |          |          |   |          |         |          |   |         |          |          |                                                                                                                                                                                                                                                                                                                                                                                                                                                                                                                                                                                                                                                                                                                                                                                                                                                                                                                                                                                                                                                                                           |          |          |          |          |          |          |          |          |          |          |          |          |          |          |          |          |           |           |           |           |           |           |           |           |           |           |           |           |           |           |           |           |           |           |           |           |           |           |           |           |           |           |           |           |           |
| H                                                                                                                                                                                                                                                                                                                                                                                                                                                                                                                                                                                                                                                                                                                                                                                                                                                                                                                                                                                                                                                                                                                                                                                                                                                                                                                                                                                                                             | 0.41549                                                                           | -1.73776                                                                           | -1.12287             |                |                                 |                                    |                                     |                              |                                      |                                               |         |         |          |   |         |         |         |   |         |          |         |   |          |          |         |   |         |          |         |   |         |         |         |   |          |         |         |   |         |         |         |   |          |         |         |   |          |         |         |   |          |         |          |   |          |          |          |   |          |          |          |   |          |          |          |   |          |         |          |   |         |          |          |                                                                                                                                                                                                                                                                                                                                                                                                                                                                                                                                                                                                                                                                                                                                                                                                                                                                                                                                                                                                                                                                                           |          |          |          |          |          |          |          |          |          |          |          |          |          |          |          |          |           |           |           |           |           |           |           |           |           |           |           |           |           |           |           |           |           |           |           |           |           |           |           |           |           |           |           |           |           |
| 218.7186                                                                                                                                                                                                                                                                                                                                                                                                                                                                                                                                                                                                                                                                                                                                                                                                                                                                                                                                                                                                                                                                                                                                                                                                                                                                                                                                                                                                                      | 249.7708                                                                          | 346.9290                                                                           |                      |                |                                 |                                    |                                     |                              |                                      |                                               |         |         |          |   |         |         |         |   |         |          |         |   |          |          |         |   |         |          |         |   |         |         |         |   |          |         |         |   |         |         |         |   |          |         |         |   |          |         |         |   |          |         |          |   |          |          |          |   |          |          |          |   |          |          |          |   |          |         |          |   |         |          |          |                                                                                                                                                                                                                                                                                                                                                                                                                                                                                                                                                                                                                                                                                                                                                                                                                                                                                                                                                                                                                                                                                           |          |          |          |          |          |          |          |          |          |          |          |          |          |          |          |          |           |           |           |           |           |           |           |           |           |           |           |           |           |           |           |           |           |           |           |           |           |           |           |           |           |           |           |           |           |
| 369.7460                                                                                                                                                                                                                                                                                                                                                                                                                                                                                                                                                                                                                                                                                                                                                                                                                                                                                                                                                                                                                                                                                                                                                                                                                                                                                                                                                                                                                      | 389.5136                                                                          | 457.7402                                                                           |                      |                |                                 |                                    |                                     |                              |                                      |                                               |         |         |          |   |         |         |         |   |         |          |         |   |          |          |         |   |         |          |         |   |         |         |         |   |          |         |         |   |         |         |         |   |          |         |         |   |          |         |         |   |          |         |          |   |          |          |          |   |          |          |          |   |          |          |          |   |          |         |          |   |         |          |          |                                                                                                                                                                                                                                                                                                                                                                                                                                                                                                                                                                                                                                                                                                                                                                                                                                                                                                                                                                                                                                                                                           |          |          |          |          |          |          |          |          |          |          |          |          |          |          |          |          |           |           |           |           |           |           |           |           |           |           |           |           |           |           |           |           |           |           |           |           |           |           |           |           |           |           |           |           |           |
| 550.7976                                                                                                                                                                                                                                                                                                                                                                                                                                                                                                                                                                                                                                                                                                                                                                                                                                                                                                                                                                                                                                                                                                                                                                                                                                                                                                                                                                                                                      | 618.5293                                                                          | 712.7037                                                                           |                      |                |                                 |                                    |                                     |                              |                                      |                                               |         |         |          |   |         |         |         |   |         |          |         |   |          |          |         |   |         |          |         |   |         |         |         |   |          |         |         |   |         |         |         |   |          |         |         |   |          |         |         |   |          |         |          |   |          |          |          |   |          |          |          |   |          |          |          |   |          |         |          |   |         |          |          |                                                                                                                                                                                                                                                                                                                                                                                                                                                                                                                                                                                                                                                                                                                                                                                                                                                                                                                                                                                                                                                                                           |          |          |          |          |          |          |          |          |          |          |          |          |          |          |          |          |           |           |           |           |           |           |           |           |           |           |           |           |           |           |           |           |           |           |           |           |           |           |           |           |           |           |           |           |           |
| 826.0150                                                                                                                                                                                                                                                                                                                                                                                                                                                                                                                                                                                                                                                                                                                                                                                                                                                                                                                                                                                                                                                                                                                                                                                                                                                                                                                                                                                                                      | 847.4259                                                                          | 898.7741                                                                           |                      |                |                                 |                                    |                                     |                              |                                      |                                               |         |         |          |   |         |         |         |   |         |          |         |   |          |          |         |   |         |          |         |   |         |         |         |   |          |         |         |   |         |         |         |   |          |         |         |   |          |         |         |   |          |         |          |   |          |          |          |   |          |          |          |   |          |          |          |   |          |         |          |   |         |          |          |                                                                                                                                                                                                                                                                                                                                                                                                                                                                                                                                                                                                                                                                                                                                                                                                                                                                                                                                                                                                                                                                                           |          |          |          |          |          |          |          |          |          |          |          |          |          |          |          |          |           |           |           |           |           |           |           |           |           |           |           |           |           |           |           |           |           |           |           |           |           |           |           |           |           |           |           |           |           |
| 916.2375                                                                                                                                                                                                                                                                                                                                                                                                                                                                                                                                                                                                                                                                                                                                                                                                                                                                                                                                                                                                                                                                                                                                                                                                                                                                                                                                                                                                                      | 921.1445                                                                          | 967.1094                                                                           |                      |                |                                 |                                    |                                     |                              |                                      |                                               |         |         |          |   |         |         |         |   |         |          |         |   |          |          |         |   |         |          |         |   |         |         |         |   |          |         |         |   |         |         |         |   |          |         |         |   |          |         |         |   |          |         |          |   |          |          |          |   |          |          |          |   |          |          |          |   |          |         |          |   |         |          |          |                                                                                                                                                                                                                                                                                                                                                                                                                                                                                                                                                                                                                                                                                                                                                                                                                                                                                                                                                                                                                                                                                           |          |          |          |          |          |          |          |          |          |          |          |          |          |          |          |          |           |           |           |           |           |           |           |           |           |           |           |           |           |           |           |           |           |           |           |           |           |           |           |           |           |           |           |           |           |
| 987.7957                                                                                                                                                                                                                                                                                                                                                                                                                                                                                                                                                                                                                                                                                                                                                                                                                                                                                                                                                                                                                                                                                                                                                                                                                                                                                                                                                                                                                      | 1012.3285                                                                         | 1039.2903                                                                          |                      |                |                                 |                                    |                                     |                              |                                      |                                               |         |         |          |   |         |         |         |   |         |          |         |   |          |          |         |   |         |          |         |   |         |         |         |   |          |         |         |   |         |         |         |   |          |         |         |   |          |         |         |   |          |         |          |   |          |          |          |   |          |          |          |   |          |          |          |   |          |         |          |   |         |          |          |                                                                                                                                                                                                                                                                                                                                                                                                                                                                                                                                                                                                                                                                                                                                                                                                                                                                                                                                                                                                                                                                                           |          |          |          |          |          |          |          |          |          |          |          |          |          |          |          |          |           |           |           |           |           |           |           |           |           |           |           |           |           |           |           |           |           |           |           |           |           |           |           |           |           |           |           |           |           |
| 1065.7574                                                                                                                                                                                                                                                                                                                                                                                                                                                                                                                                                                                                                                                                                                                                                                                                                                                                                                                                                                                                                                                                                                                                                                                                                                                                                                                                                                                                                     | 1099.6435                                                                         | 1125.4589                                                                          |                      |                |                                 |                                    |                                     |                              |                                      |                                               |         |         |          |   |         |         |         |   |         |          |         |   |          |          |         |   |         |          |         |   |         |         |         |   |          |         |         |   |         |         |         |   |          |         |         |   |          |         |         |   |          |         |          |   |          |          |          |   |          |          |          |   |          |          |          |   |          |         |          |   |         |          |          |                                                                                                                                                                                                                                                                                                                                                                                                                                                                                                                                                                                                                                                                                                                                                                                                                                                                                                                                                                                                                                                                                           |          |          |          |          |          |          |          |          |          |          |          |          |          |          |          |          |           |           |           |           |           |           |           |           |           |           |           |           |           |           |           |           |           |           |           |           |           |           |           |           |           |           |           |           |           |
| 1174.1473                                                                                                                                                                                                                                                                                                                                                                                                                                                                                                                                                                                                                                                                                                                                                                                                                                                                                                                                                                                                                                                                                                                                                                                                                                                                                                                                                                                                                     | 1211.8734                                                                         | 1253.4906                                                                          |                      |                |                                 |                                    |                                     |                              |                                      |                                               |         |         |          |   |         |         |         |   |         |          |         |   |          |          |         |   |         |          |         |   |         |         |         |   |          |         |         |   |         |         |         |   |          |         |         |   |          |         |         |   |          |         |          |   |          |          |          |   |          |          |          |   |          |          |          |   |          |         |          |   |         |          |          |                                                                                                                                                                                                                                                                                                                                                                                                                                                                                                                                                                                                                                                                                                                                                                                                                                                                                                                                                                                                                                                                                           |          |          |          |          |          |          |          |          |          |          |          |          |          |          |          |          |           |           |           |           |           |           |           |           |           |           |           |           |           |           |           |           |           |           |           |           |           |           |           |           |           |           |           |           |           |
| 1274.9256                                                                                                                                                                                                                                                                                                                                                                                                                                                                                                                                                                                                                                                                                                                                                                                                                                                                                                                                                                                                                                                                                                                                                                                                                                                                                                                                                                                                                     | 1290.3576                                                                         | 1330.2710                                                                          |                      |                |                                 |                                    |                                     |                              |                                      |                                               |         |         |          |   |         |         |         |   |         |          |         |   |          |          |         |   |         |          |         |   |         |         |         |   |          |         |         |   |         |         |         |   |          |         |         |   |          |         |         |   |          |         |          |   |          |          |          |   |          |          |          |   |          |          |          |   |          |         |          |   |         |          |          |                                                                                                                                                                                                                                                                                                                                                                                                                                                                                                                                                                                                                                                                                                                                                                                                                                                                                                                                                                                                                                                                                           |          |          |          |          |          |          |          |          |          |          |          |          |          |          |          |          |           |           |           |           |           |           |           |           |           |           |           |           |           |           |           |           |           |           |           |           |           |           |           |           |           |           |           |           |           |
| 1349.9471                                                                                                                                                                                                                                                                                                                                                                                                                                                                                                                                                                                                                                                                                                                                                                                                                                                                                                                                                                                                                                                                                                                                                                                                                                                                                                                                                                                                                     | 1361.9481                                                                         | 1370.9121                                                                          |                      |                |                                 |                                    |                                     |                              |                                      |                                               |         |         |          |   |         |         |         |   |         |          |         |   |          |          |         |   |         |          |         |   |         |         |         |   |          |         |         |   |         |         |         |   |          |         |         |   |          |         |         |   |          |         |          |   |          |          |          |   |          |          |          |   |          |          |          |   |          |         |          |   |         |          |          |                                                                                                                                                                                                                                                                                                                                                                                                                                                                                                                                                                                                                                                                                                                                                                                                                                                                                                                                                                                                                                                                                           |          |          |          |          |          |          |          |          |          |          |          |          |          |          |          |          |           |           |           |           |           |           |           |           |           |           |           |           |           |           |           |           |           |           |           |           |           |           |           |           |           |           |           |           |           |
| 1425.9593                                                                                                                                                                                                                                                                                                                                                                                                                                                                                                                                                                                                                                                                                                                                                                                                                                                                                                                                                                                                                                                                                                                                                                                                                                                                                                                                                                                                                     | 1501.3010                                                                         | 1506.3580                                                                          |                      |                |                                 |                                    |                                     |                              |                                      |                                               |         |         |          |   |         |         |         |   |         |          |         |   |          |          |         |   |         |          |         |   |         |         |         |   |          |         |         |   |         |         |         |   |          |         |         |   |          |         |         |   |          |         |          |   |          |          |          |   |          |          |          |   |          |          |          |   |          |         |          |   |         |          |          |                                                                                                                                                                                                                                                                                                                                                                                                                                                                                                                                                                                                                                                                                                                                                                                                                                                                                                                                                                                                                                                                                           |          |          |          |          |          |          |          |          |          |          |          |          |          |          |          |          |           |           |           |           |           |           |           |           |           |           |           |           |           |           |           |           |           |           |           |           |           |           |           |           |           |           |           |           |           |
| 1516.1429                                                                                                                                                                                                                                                                                                                                                                                                                                                                                                                                                                                                                                                                                                                                                                                                                                                                                                                                                                                                                                                                                                                                                                                                                                                                                                                                                                                                                     | 1536.0356                                                                         | 3069.6620                                                                          |                      |                |                                 |                                    |                                     |                              |                                      |                                               |         |         |          |   |         |         |         |   |         |          |         |   |          |          |         |   |         |          |         |   |         |         |         |   |          |         |         |   |         |         |         |   |          |         |         |   |          |         |         |   |          |         |          |   |          |          |          |   |          |          |          |   |          |          |          |   |          |         |          |   |         |          |          |                                                                                                                                                                                                                                                                                                                                                                                                                                                                                                                                                                                                                                                                                                                                                                                                                                                                                                                                                                                                                                                                                           |          |          |          |          |          |          |          |          |          |          |          |          |          |          |          |          |           |           |           |           |           |           |           |           |           |           |           |           |           |           |           |           |           |           |           |           |           |           |           |           |           |           |           |           |           |
| 3076.7137                                                                                                                                                                                                                                                                                                                                                                                                                                                                                                                                                                                                                                                                                                                                                                                                                                                                                                                                                                                                                                                                                                                                                                                                                                                                                                                                                                                                                     | 3096.2241                                                                         | 3117.9686                                                                          |                      |                |                                 |                                    |                                     |                              |                                      |                                               |         |         |          |   |         |         |         |   |         |          |         |   |          |          |         |   |         |          |         |   |         |         |         |   |          |         |         |   |         |         |         |   |          |         |         |   |          |         |         |   |          |         |          |   |          |          |          |   |          |          |          |   |          |          |          |   |          |         |          |   |         |          |          |                                                                                                                                                                                                                                                                                                                                                                                                                                                                                                                                                                                                                                                                                                                                                                                                                                                                                                                                                                                                                                                                                           |          |          |          |          |          |          |          |          |          |          |          |          |          |          |          |          |           |           |           |           |           |           |           |           |           |           |           |           |           |           |           |           |           |           |           |           |           |           |           |           |           |           |           |           |           |
| 3122.9285                                                                                                                                                                                                                                                                                                                                                                                                                                                                                                                                                                                                                                                                                                                                                                                                                                                                                                                                                                                                                                                                                                                                                                                                                                                                                                                                                                                                                     | 3145.5093                                                                         | 3150.0545                                                                          |                      |                |                                 |                                    |                                     |                              |                                      |                                               |         |         |          |   |         |         |         |   |         |          |         |   |          |          |         |   |         |          |         |   |         |         |         |   |          |         |         |   |         |         |         |   |          |         |         |   |          |         |         |   |          |         |          |   |          |          |          |   |          |          |          |   |          |          |          |   |          |         |          |   |         |          |          |                                                                                                                                                                                                                                                                                                                                                                                                                                                                                                                                                                                                                                                                                                                                                                                                                                                                                                                                                                                                                                                                                           |          |          |          |          |          |          |          |          |          |          |          |          |          |          |          |          |           |           |           |           |           |           |           |           |           |           |           |           |           |           |           |           |           |           |           |           |           |           |           |           |           |           |           |           |           |
| 3221.3029                                                                                                                                                                                                                                                                                                                                                                                                                                                                                                                                                                                                                                                                                                                                                                                                                                                                                                                                                                                                                                                                                                                                                                                                                                                                                                                                                                                                                     | 3241.3378                                                                         | 3880.0908                                                                          |                      |                |                                 |                                    |                                     |                              |                                      |                                               |         |         |          |   |         |         |         |   |         |          |         |   |          |          |         |   |         |          |         |   |         |         |         |   |          |         |         |   |         |         |         |   |          |         |         |   |          |         |         |   |          |         |          |   |          |          |          |   |          |          |          |   |          |          |          |   |          |         |          |   |         |          |          |                                                                                                                                                                                                                                                                                                                                                                                                                                                                                                                                                                                                                                                                                                                                                                                                                                                                                                                                                                                                                                                                                           |          |          |          |          |          |          |          |          |          |          |          |          |          |          |          |          |           |           |           |           |           |           |           |           |           |           |           |           |           |           |           |           |           |           |           |           |           |           |           |           |           |           |           |           |           |
| <p style="text-align: center;"><b><u>Statistical Thermodynamic Analysis</u></b></p> <table border="0"> <tbody> <tr> <td>Temperature=298.15 K</td> <td>Pressure=1 atm</td> </tr> <tr> <td>Zero-point correction= 0.152288</td> <td>Electronic Energy = -309.718741856</td> </tr> <tr> <td>Internal Energy (E)= -309.560224856</td> <td>Enthalpy (H)= -309.559280856</td> </tr> <tr> <td>Gibbs Free Energy (G)=-309.595983856</td> <td>Gibbs Free Energy of Solvation=-309.599133984</td> </tr> </tbody> </table>                                                                                                                                                                                                                                                                                                                                                                                                                                                                                                                                                                                                                                                                                                                                                                                                                                                                                                               |                                                                                   |                                                                                    | Temperature=298.15 K | Pressure=1 atm | Zero-point correction= 0.152288 | Electronic Energy = -309.718741856 | Internal Energy (E)= -309.560224856 | Enthalpy (H)= -309.559280856 | Gibbs Free Energy (G)=-309.595983856 | Gibbs Free Energy of Solvation=-309.599133984 |         |         |          |   |         |         |         |   |         |          |         |   |          |          |         |   |         |          |         |   |         |         |         |   |          |         |         |   |         |         |         |   |          |         |         |   |          |         |         |   |          |         |          |   |          |          |          |   |          |          |          |   |          |          |          |   |          |         |          |   |         |          |          |                                                                                                                                                                                                                                                                                                                                                                                                                                                                                                                                                                                                                                                                                                                                                                                                                                                                                                                                                                                                                                                                                           |          |          |          |          |          |          |          |          |          |          |          |          |          |          |          |          |           |           |           |           |           |           |           |           |           |           |           |           |           |           |           |           |           |           |           |           |           |           |           |           |           |           |           |           |           |
| Temperature=298.15 K                                                                                                                                                                                                                                                                                                                                                                                                                                                                                                                                                                                                                                                                                                                                                                                                                                                                                                                                                                                                                                                                                                                                                                                                                                                                                                                                                                                                          | Pressure=1 atm                                                                    |                                                                                    |                      |                |                                 |                                    |                                     |                              |                                      |                                               |         |         |          |   |         |         |         |   |         |          |         |   |          |          |         |   |         |          |         |   |         |         |         |   |          |         |         |   |         |         |         |   |          |         |         |   |          |         |         |   |          |         |          |   |          |          |          |   |          |          |          |   |          |          |          |   |          |         |          |   |         |          |          |                                                                                                                                                                                                                                                                                                                                                                                                                                                                                                                                                                                                                                                                                                                                                                                                                                                                                                                                                                                                                                                                                           |          |          |          |          |          |          |          |          |          |          |          |          |          |          |          |          |           |           |           |           |           |           |           |           |           |           |           |           |           |           |           |           |           |           |           |           |           |           |           |           |           |           |           |           |           |
| Zero-point correction= 0.152288                                                                                                                                                                                                                                                                                                                                                                                                                                                                                                                                                                                                                                                                                                                                                                                                                                                                                                                                                                                                                                                                                                                                                                                                                                                                                                                                                                                               | Electronic Energy = -309.718741856                                                |                                                                                    |                      |                |                                 |                                    |                                     |                              |                                      |                                               |         |         |          |   |         |         |         |   |         |          |         |   |          |          |         |   |         |          |         |   |         |         |         |   |          |         |         |   |         |         |         |   |          |         |         |   |          |         |         |   |          |         |          |   |          |          |          |   |          |          |          |   |          |          |          |   |          |         |          |   |         |          |          |                                                                                                                                                                                                                                                                                                                                                                                                                                                                                                                                                                                                                                                                                                                                                                                                                                                                                                                                                                                                                                                                                           |          |          |          |          |          |          |          |          |          |          |          |          |          |          |          |          |           |           |           |           |           |           |           |           |           |           |           |           |           |           |           |           |           |           |           |           |           |           |           |           |           |           |           |           |           |
| Internal Energy (E)= -309.560224856                                                                                                                                                                                                                                                                                                                                                                                                                                                                                                                                                                                                                                                                                                                                                                                                                                                                                                                                                                                                                                                                                                                                                                                                                                                                                                                                                                                           | Enthalpy (H)= -309.559280856                                                      |                                                                                    |                      |                |                                 |                                    |                                     |                              |                                      |                                               |         |         |          |   |         |         |         |   |         |          |         |   |          |          |         |   |         |          |         |   |         |         |         |   |          |         |         |   |         |         |         |   |          |         |         |   |          |         |         |   |          |         |          |   |          |          |          |   |          |          |          |   |          |          |          |   |          |         |          |   |         |          |          |                                                                                                                                                                                                                                                                                                                                                                                                                                                                                                                                                                                                                                                                                                                                                                                                                                                                                                                                                                                                                                                                                           |          |          |          |          |          |          |          |          |          |          |          |          |          |          |          |          |           |           |           |           |           |           |           |           |           |           |           |           |           |           |           |           |           |           |           |           |           |           |           |           |           |           |           |           |           |
| Gibbs Free Energy (G)=-309.595983856                                                                                                                                                                                                                                                                                                                                                                                                                                                                                                                                                                                                                                                                                                                                                                                                                                                                                                                                                                                                                                                                                                                                                                                                                                                                                                                                                                                          | Gibbs Free Energy of Solvation=-309.599133984                                     |                                                                                    |                      |                |                                 |                                    |                                     |                              |                                      |                                               |         |         |          |   |         |         |         |   |         |          |         |   |          |          |         |   |         |          |         |   |         |         |         |   |          |         |         |   |         |         |         |   |          |         |         |   |          |         |         |   |          |         |          |   |          |          |          |   |          |          |          |   |          |          |          |   |          |         |          |   |         |          |          |                                                                                                                                                                                                                                                                                                                                                                                                                                                                                                                                                                                                                                                                                                                                                                                                                                                                                                                                                                                                                                                                                           |          |          |          |          |          |          |          |          |          |          |          |          |          |          |          |          |           |           |           |           |           |           |           |           |           |           |           |           |           |           |           |           |           |           |           |           |           |           |           |           |           |           |           |           |           |

| St.Pt.                                           | General Structure                                                                 | Ball & Stick model                                                                 |                                               |           |           |           |
|--------------------------------------------------|-----------------------------------------------------------------------------------|------------------------------------------------------------------------------------|-----------------------------------------------|-----------|-----------|-----------|
| b <sub>Ni</sub>                                  | 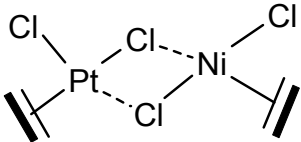 |  |                                               |           |           |           |
| <b><u>Cartesian co-ordinate</u></b>              |                                                                                   | <b><u>Frequencies</u></b>                                                          |                                               |           |           |           |
| -----<br>Atoms                                   | X                                                                                 | Y                                                                                  | Z                                             |           |           |           |
| -----                                            |                                                                                   |                                                                                    |                                               |           |           |           |
| C                                                | -2.68242                                                                          | -1.54002                                                                           | -0.70110                                      | 14.6871   | 41.1237   | 78.0032   |
| C                                                | -2.68273                                                                          | -1.54021                                                                           | 0.70052                                       | 92.0705   | 113.2494  | 114.6347  |
| Pt                                               | -1.32664                                                                          | -0.06293                                                                           | 0.00020                                       | 145.0093  | 145.1705  | 153.8490  |
| Cl                                               | -3.03444                                                                          | 1.49492                                                                            | 0.00005                                       | 174.0219  | 193.2563  | 200.5712  |
| Cl                                               | 0.54871                                                                           | -1.59230                                                                           | 0.00042                                       | 244.9249  | 264.4598  | 287.6376  |
| H                                                | -2.10368                                                                          | -2.27562                                                                           | 1.25133                                       | 301.5910  | 307.8828  | 335.7189  |
| H                                                | -3.46591                                                                          | -1.01952                                                                           | 1.24182                                       | 356.3977  | 383.3775  | 404.2843  |
| H                                                | -3.46538                                                                          | -1.01920                                                                           | -1.24261                                      | 464.8156  | 507.6859  | 771.7943  |
| H                                                | -2.10313                                                                          | -2.27528                                                                           | -1.25184                                      | 830.8142  | 847.2359  | 1023.4352 |
| Cl                                               | 3.73808                                                                           | -1.42718                                                                           | -0.00097                                      | 1053.0863 | 1057.4664 | 1065.4482 |
| Cl                                               | 0.46073                                                                           | 1.64104                                                                            | 0.00089                                       | 1075.7296 | 1078.2419 | 1230.1345 |
| H                                                | 4.30637                                                                           | 1.01051                                                                            | 1.22871                                       | 1240.3719 | 1289.5829 | 1369.3859 |
| C                                                | 3.61370                                                                           | 1.63804                                                                            | 0.67626                                       | 1468.3602 | 1479.3156 | 1581.2776 |
| C                                                | 3.61302                                                                           | 1.63806                                                                            | -0.67802                                      | 1654.5588 | 3177.1298 | 3179.0677 |
| H                                                | 2.96996                                                                           | 2.31060                                                                            | 1.23702                                       | 3182.4152 | 3184.0796 | 3275.6983 |
| H                                                | 2.96869                                                                           | 2.31062                                                                            | -1.23812                                      | 3279.7243 | 3293.1124 | 3294.1855 |
| H                                                | 4.30511                                                                           | 1.01053                                                                            | -1.23119                                      |           |           |           |
| Ni                                               | 2.13479                                                                           | 0.06075                                                                            | -0.00013                                      |           |           |           |
| <b><u>Statistical Thermodynamic Analysis</u></b> |                                                                                   |                                                                                    |                                               |           |           |           |
| Temperature=298.15 K                             |                                                                                   |                                                                                    | Pressure=1 atm                                |           |           |           |
| Zero-point correction= 0.116884                  |                                                                                   |                                                                                    | Electronic Energy = -2286.25336720            |           |           |           |
| Internal Energy (E)= -2286.1207452               |                                                                                   |                                                                                    | Enthalpy (H)= -2286.1198012                   |           |           |           |
| Gibbs Free Energy (G)=-2286.1830642              |                                                                                   |                                                                                    | Gibbs Free Energy of Solvation=-2286.20156192 |           |           |           |

| St.Pt.                              | General Structure | Ball & Stick model        |          |           |           |           |
|-------------------------------------|-------------------|---------------------------|----------|-----------|-----------|-----------|
| 1Ni <sub>1</sub>                    |                   |                           |          |           |           |           |
| <b><u>Cartesian co-ordinate</u></b> |                   | <b><u>Frequencies</u></b> |          |           |           |           |
| -----<br>Atoms                      | X                 | Y                         | Z        |           |           |           |
| -----                               |                   |                           |          |           |           |           |
| C                                   | -1.15073          | -2.97819                  | 0.00884  | 43.4593   | 50.2829   | 53.8080   |
| C                                   | -1.30616          | -2.47437                  | 1.24707  | 67.6308   | 78.7050   | 95.9484   |
| Pt                                  | -1.32446          | -0.43520                  | -0.44808 | 101.9862  | 105.8072  | 119.7683  |
| Cl                                  | -3.59744          | -0.37913                  | 0.09247  | 135.7188  | 149.2252  | 152.2260  |
| Cl                                  | 0.81908           | -0.71589                  | -1.53958 | 169.6882  | 174.6670  | 179.4808  |
| H                                   | -0.43309          | -2.29050                  | 1.86746  | 186.2285  | 194.9880  | 207.6802  |
| H                                   | -2.29241          | -2.31091                  | 1.67040  | 218.7550  | 235.7390  | 239.5269  |
| H                                   | -2.01253          | -3.25287                  | -0.59578 | 255.0670  | 275.8186  | 292.5023  |
| H                                   | -0.15890          | -3.18340                  | -0.38390 | 295.5804  | 308.2403  | 320.5184  |
| Cl                                  | 2.91783           | 1.73196                   | -1.29908 | 323.3671  | 336.2339  | 363.1203  |
| Cl                                  | 2.16078           | -1.89452                  | 1.24353  | 371.7564  | 431.8519  | 444.0453  |
| H                                   | 5.15526           | 0.28829                   | -0.42387 | 465.2120  | 520.4215  | 534.0981  |
| C                                   | 4.72718           | -0.15347                  | 0.47078  | 578.3688  | 634.6968  | 656.8773  |
| C                                   | 4.09346           | 0.61864                   | 1.38495  | 809.0618  | 837.5424  | 844.3787  |
| H                                   | 4.86113           | -1.21761                  | 0.64198  | 847.3932  | 861.1067  | 878.9464  |
| H                                   | 3.71886           | 0.18452                   | 2.30671  | 922.2967  | 954.3381  | 1006.9063 |
| H                                   | 4.00528           | 1.69043                   | 1.23822  | 1029.9587 | 1042.6623 | 1043.7458 |
| C                                   | -0.64523          | 2.18167                   | -0.14637 | 1049.3502 | 1057.4937 | 1061.6580 |
| O                                   | 0.64725           | 0.71365                   | 1.29158  | 1072.5189 | 1081.2431 | 1100.5117 |
| C                                   | -0.58922          | 1.08479                   | 0.90822  | 1121.1438 | 1161.4976 | 1187.5683 |
| C                                   | -1.40692          | 1.42941                   | -1.25082 | 1197.8275 | 1243.9494 | 1246.4654 |
| H                                   | -2.45329          | 1.72003                   | -1.34939 | 1247.5834 | 1276.2763 | 1297.8082 |
| H                                   | -0.88533          | 1.40374                   | -2.20686 | 1317.3508 | 1333.0561 | 1351.9114 |
| H                                   | 0.65192           | -0.06819                  | 1.87506  | 1366.0646 | 1369.9459 | 1373.0783 |
| C                                   | -1.60789          | 1.38346                   | 2.00727  | 1412.1056 | 1459.2606 | 1468.1150 |
| H                                   | -2.20128          | 0.52255                   | 2.31751  | 1474.1706 | 1476.2541 | 1500.5692 |
| C                                   | -2.43311          | 2.55173                   | 1.44651  | 1526.1208 | 1655.8362 | 1672.7382 |
| H                                   | -3.27788          | 2.16129                   | 0.87417  | 3076.1583 | 3086.7257 | 3112.3037 |
| H                                   | -2.82993          | 3.18399                   | 2.24320  | 3127.2739 | 3132.4781 | 3144.1402 |
| C                                   | -1.44921          | 3.29932                   | 0.52864  | 3167.4164 | 3171.7786 | 3179.0766 |
| H                                   | -1.94919          | 3.94011                   | -0.20201 | 3180.0469 | 3180.5308 | 3191.5251 |
|                                     |                   |                           |          | 3214.6975 | 3269.8311 | 3280.6941 |
|                                     |                   |                           |          | 3288.5296 | 3300.2024 | 3711.1780 |

|                                                  |          |                                               |          |  |
|--------------------------------------------------|----------|-----------------------------------------------|----------|--|
| H                                                | -0.77560 | 3.92655                                       | 1.12264  |  |
| H                                                | -1.00403 | 1.71902                                       | 2.86033  |  |
| H                                                | 0.36217  | 2.45419                                       | -0.47311 |  |
| Ni                                               | 2.54114  | -0.10406                                      | -0.10179 |  |
| <b><u>Statistical Thermodynamic Analysis</u></b> |          |                                               |          |  |
| Temperature=298.15 K                             |          | Pressure=1 atm                                |          |  |
| Zero-point correction= 0.269784                  |          | Electronic Energy = -2595.98236528            |          |  |
| Internal Energy (E)= -2595.68904228              |          | Enthalpy (H)= -2595.68809828                  |          |  |
| Gibbs Free Energy (G)=-2595.76608328             |          | Gibbs Free Energy of Solvation=-2595.78325217 |          |  |

| St.Pt.             | General Structure                                                                                                                                                                                                                                                                                                                                                                                                                                                                                                                                                                                                                                                                                                                                                                                                                                                                                                                                                                                                                                                                                                                                                                                                                                                                                                                                                                                                                                                                                                                                                                                                                                                                                                                                                                                                                                                                                                                                                                                                                                                                                                                                                                                                                                                                                                                                                   | Ball & Stick model                                                                 |          |   |   |   |          |          |         |   |          |          |         |    |          |          |          |    |          |          |         |    |         |          |          |   |         |          |         |   |          |          |         |   |          |          |          |   |         |          |          |    |         |         |          |    |         |          |         |   |         |         |          |   |         |         |         |   |         |         |         |   |         |          |         |   |         |          |         |   |         |         |         |   |          |         |          |   |         |         |         |   |          |         |         |   |          |         |          |   |          |         |          |   |          |         |          |   |         |         |         |   |          |         |         |   |          |         |         |   |          |         |         |   |          |         |         |   |          |         |         |   |          |         |         |                                                                                                                                                                                                                                                                                                                                                                                                                                                                                                                                                                                                                                                                                                                                                                                                                                                                                                                                                                                                                                                                                                                                                                                                                                                                                                                                                                                                                                                                                                                                                                                                                                                                                                                                                                                                                                                                                                                                                                                                                                                                                                                                                                                                                                                       |           |         |         |         |         |         |         |          |          |          |          |          |          |          |          |          |          |          |          |          |          |          |          |          |          |          |          |          |          |          |          |          |          |          |          |          |          |          |          |          |          |          |          |          |          |          |          |           |           |           |           |           |           |           |           |           |           |           |           |           |           |           |           |           |           |           |           |           |           |           |           |           |           |           |           |           |           |           |           |           |           |           |           |           |           |           |           |           |           |           |           |           |           |           |           |           |           |           |           |
|--------------------|---------------------------------------------------------------------------------------------------------------------------------------------------------------------------------------------------------------------------------------------------------------------------------------------------------------------------------------------------------------------------------------------------------------------------------------------------------------------------------------------------------------------------------------------------------------------------------------------------------------------------------------------------------------------------------------------------------------------------------------------------------------------------------------------------------------------------------------------------------------------------------------------------------------------------------------------------------------------------------------------------------------------------------------------------------------------------------------------------------------------------------------------------------------------------------------------------------------------------------------------------------------------------------------------------------------------------------------------------------------------------------------------------------------------------------------------------------------------------------------------------------------------------------------------------------------------------------------------------------------------------------------------------------------------------------------------------------------------------------------------------------------------------------------------------------------------------------------------------------------------------------------------------------------------------------------------------------------------------------------------------------------------------------------------------------------------------------------------------------------------------------------------------------------------------------------------------------------------------------------------------------------------------------------------------------------------------------------------------------------------|------------------------------------------------------------------------------------|----------|---|---|---|----------|----------|---------|---|----------|----------|---------|----|----------|----------|----------|----|----------|----------|---------|----|---------|----------|----------|---|---------|----------|---------|---|----------|----------|---------|---|----------|----------|----------|---|---------|----------|----------|----|---------|---------|----------|----|---------|----------|---------|---|---------|---------|----------|---|---------|---------|---------|---|---------|---------|---------|---|---------|----------|---------|---|---------|----------|---------|---|---------|---------|---------|---|----------|---------|----------|---|---------|---------|---------|---|----------|---------|---------|---|----------|---------|----------|---|----------|---------|----------|---|----------|---------|----------|---|---------|---------|---------|---|----------|---------|---------|---|----------|---------|---------|---|----------|---------|---------|---|----------|---------|---------|---|----------|---------|---------|---|----------|---------|---------|-------------------------------------------------------------------------------------------------------------------------------------------------------------------------------------------------------------------------------------------------------------------------------------------------------------------------------------------------------------------------------------------------------------------------------------------------------------------------------------------------------------------------------------------------------------------------------------------------------------------------------------------------------------------------------------------------------------------------------------------------------------------------------------------------------------------------------------------------------------------------------------------------------------------------------------------------------------------------------------------------------------------------------------------------------------------------------------------------------------------------------------------------------------------------------------------------------------------------------------------------------------------------------------------------------------------------------------------------------------------------------------------------------------------------------------------------------------------------------------------------------------------------------------------------------------------------------------------------------------------------------------------------------------------------------------------------------------------------------------------------------------------------------------------------------------------------------------------------------------------------------------------------------------------------------------------------------------------------------------------------------------------------------------------------------------------------------------------------------------------------------------------------------------------------------------------------------------------------------------------------------|-----------|---------|---------|---------|---------|---------|---------|----------|----------|----------|----------|----------|----------|----------|----------|----------|----------|----------|----------|----------|----------|----------|----------|----------|----------|----------|----------|----------|----------|----------|----------|----------|----------|----------|----------|----------|----------|----------|----------|----------|----------|----------|----------|----------|----------|----------|----------|-----------|-----------|-----------|-----------|-----------|-----------|-----------|-----------|-----------|-----------|-----------|-----------|-----------|-----------|-----------|-----------|-----------|-----------|-----------|-----------|-----------|-----------|-----------|-----------|-----------|-----------|-----------|-----------|-----------|-----------|-----------|-----------|-----------|-----------|-----------|-----------|-----------|-----------|-----------|-----------|-----------|-----------|-----------|-----------|-----------|-----------|-----------|-----------|-----------|-----------|-----------|-----------|
| 1NiTS <sub>1</sub> | 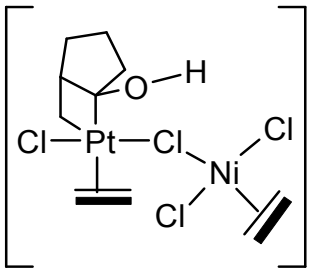                                                                                                                                                                                                                                                                                                                                                                                                                                                                                                                                                                                                                                                                                                                                                                                                                                                                                                                                                                                                                                                                                                                                                                                                                                                                                                                                                                                                                                                                                                                                                                                                                                                                                                                                                                                                                                                                                                                                                                                                                                                                                                                                                                                                                                                                                   |  |          |   |   |   |          |          |         |   |          |          |         |    |          |          |          |    |          |          |         |    |         |          |          |   |         |          |         |   |          |          |         |   |          |          |          |   |         |          |          |    |         |         |          |    |         |          |         |   |         |         |          |   |         |         |         |   |         |         |         |   |         |          |         |   |         |          |         |   |         |         |         |   |          |         |          |   |         |         |         |   |          |         |         |   |          |         |          |   |          |         |          |   |          |         |          |   |         |         |         |   |          |         |         |   |          |         |         |   |          |         |         |   |          |         |         |   |          |         |         |   |          |         |         |                                                                                                                                                                                                                                                                                                                                                                                                                                                                                                                                                                                                                                                                                                                                                                                                                                                                                                                                                                                                                                                                                                                                                                                                                                                                                                                                                                                                                                                                                                                                                                                                                                                                                                                                                                                                                                                                                                                                                                                                                                                                                                                                                                                                                                                       |           |         |         |         |         |         |         |          |          |          |          |          |          |          |          |          |          |          |          |          |          |          |          |          |          |          |          |          |          |          |          |          |          |          |          |          |          |          |          |          |          |          |          |          |          |          |          |           |           |           |           |           |           |           |           |           |           |           |           |           |           |           |           |           |           |           |           |           |           |           |           |           |           |           |           |           |           |           |           |           |           |           |           |           |           |           |           |           |           |           |           |           |           |           |           |           |           |           |           |
|                    | <p style="text-align: center;"><b><u>Cartesian co-ordinate</u></b></p> <table border="1"> <thead> <tr> <th>Atoms</th> <th>X</th> <th>Y</th> <th>Z</th> </tr> </thead> <tbody> <tr><td>C</td><td>-0.82038</td><td>-2.95340</td><td>0.25706</td></tr> <tr><td>C</td><td>-0.79550</td><td>-2.29322</td><td>1.43199</td></tr> <tr><td>Pt</td><td>-1.30935</td><td>-0.52083</td><td>-0.40665</td></tr> <tr><td>Cl</td><td>-3.52656</td><td>-0.72826</td><td>0.29133</td></tr> <tr><td>Cl</td><td>0.79130</td><td>-0.49097</td><td>-1.59236</td></tr> <tr><td>H</td><td>0.14791</td><td>-1.93357</td><td>1.83339</td></tr> <tr><td>H</td><td>-1.70277</td><td>-2.15943</td><td>2.01477</td></tr> <tr><td>H</td><td>-1.74572</td><td>-3.37958</td><td>-0.12515</td></tr> <tr><td>H</td><td>0.10363</td><td>-3.13477</td><td>-0.28584</td></tr> <tr><td>Cl</td><td>2.66038</td><td>2.12762</td><td>-0.82465</td></tr> <tr><td>Cl</td><td>2.53035</td><td>-2.08805</td><td>0.67472</td></tr> <tr><td>H</td><td>5.08367</td><td>0.81532</td><td>-0.40305</td></tr> <tr><td>C</td><td>4.76096</td><td>0.09893</td><td>0.34621</td></tr> <tr><td>C</td><td>4.10097</td><td>0.51197</td><td>1.45443</td></tr> <tr><td>H</td><td>5.01872</td><td>-0.94737</td><td>0.21441</td></tr> <tr><td>H</td><td>3.83113</td><td>-0.19710</td><td>2.23106</td></tr> <tr><td>H</td><td>3.90350</td><td>1.56818</td><td>1.60956</td></tr> <tr><td>C</td><td>-0.90735</td><td>2.12283</td><td>-0.33706</td></tr> <tr><td>O</td><td>0.52606</td><td>0.72654</td><td>1.22991</td></tr> <tr><td>C</td><td>-0.73763</td><td>1.08932</td><td>0.78797</td></tr> <tr><td>C</td><td>-1.69020</td><td>1.25081</td><td>-1.33064</td></tr> <tr><td>H</td><td>-2.76706</td><td>1.41921</td><td>-1.33404</td></tr> <tr><td>H</td><td>-1.26693</td><td>1.21075</td><td>-2.33323</td></tr> <tr><td>H</td><td>0.83922</td><td>1.40284</td><td>1.84884</td></tr> <tr><td>C</td><td>-1.71481</td><td>1.44675</td><td>1.90774</td></tr> <tr><td>H</td><td>-2.22203</td><td>0.58511</td><td>2.34218</td></tr> <tr><td>C</td><td>-2.64151</td><td>2.50820</td><td>1.30495</td></tr> <tr><td>H</td><td>-3.48117</td><td>2.02235</td><td>0.80054</td></tr> <tr><td>H</td><td>-3.05166</td><td>3.17345</td><td>2.06737</td></tr> <tr><td>C</td><td>-1.74191</td><td>3.24151</td><td>0.29497</td></tr> </tbody> </table> | Atoms                                                                              | X        | Y | Z | C | -0.82038 | -2.95340 | 0.25706 | C | -0.79550 | -2.29322 | 1.43199 | Pt | -1.30935 | -0.52083 | -0.40665 | Cl | -3.52656 | -0.72826 | 0.29133 | Cl | 0.79130 | -0.49097 | -1.59236 | H | 0.14791 | -1.93357 | 1.83339 | H | -1.70277 | -2.15943 | 2.01477 | H | -1.74572 | -3.37958 | -0.12515 | H | 0.10363 | -3.13477 | -0.28584 | Cl | 2.66038 | 2.12762 | -0.82465 | Cl | 2.53035 | -2.08805 | 0.67472 | H | 5.08367 | 0.81532 | -0.40305 | C | 4.76096 | 0.09893 | 0.34621 | C | 4.10097 | 0.51197 | 1.45443 | H | 5.01872 | -0.94737 | 0.21441 | H | 3.83113 | -0.19710 | 2.23106 | H | 3.90350 | 1.56818 | 1.60956 | C | -0.90735 | 2.12283 | -0.33706 | O | 0.52606 | 0.72654 | 1.22991 | C | -0.73763 | 1.08932 | 0.78797 | C | -1.69020 | 1.25081 | -1.33064 | H | -2.76706 | 1.41921 | -1.33404 | H | -1.26693 | 1.21075 | -2.33323 | H | 0.83922 | 1.40284 | 1.84884 | C | -1.71481 | 1.44675 | 1.90774 | H | -2.22203 | 0.58511 | 2.34218 | C | -2.64151 | 2.50820 | 1.30495 | H | -3.48117 | 2.02235 | 0.80054 | H | -3.05166 | 3.17345 | 2.06737 | C | -1.74191 | 3.24151 | 0.29497 | <p style="text-align: center;"><b><u>Frequencies</u></b></p> <table border="1"> <tbody> <tr><td>-403.7269</td><td>39.4494</td><td>43.4190</td></tr> <tr><td>58.5135</td><td>75.4914</td><td>82.1553</td></tr> <tr><td>91.2215</td><td>101.2886</td><td>117.1379</td></tr> <tr><td>129.7231</td><td>137.8439</td><td>150.6632</td></tr> <tr><td>165.7095</td><td>171.0236</td><td>177.9096</td></tr> <tr><td>183.1308</td><td>190.9979</td><td>198.8810</td></tr> <tr><td>216.4432</td><td>228.9438</td><td>238.2625</td></tr> <tr><td>249.0338</td><td>274.7708</td><td>286.4805</td></tr> <tr><td>298.4855</td><td>304.0179</td><td>311.7018</td></tr> <tr><td>315.4731</td><td>323.4610</td><td>338.5417</td></tr> <tr><td>372.1419</td><td>376.3348</td><td>437.0285</td></tr> <tr><td>441.2549</td><td>464.7824</td><td>551.8564</td></tr> <tr><td>577.3141</td><td>633.9556</td><td>657.6382</td></tr> <tr><td>811.5085</td><td>838.4658</td><td>842.4375</td></tr> <tr><td>844.5586</td><td>855.0881</td><td>880.8583</td></tr> <tr><td>923.1106</td><td>953.4014</td><td>1005.2436</td></tr> <tr><td>1036.2672</td><td>1038.0285</td><td>1042.0726</td></tr> <tr><td>1049.7687</td><td>1055.4589</td><td>1059.8028</td></tr> <tr><td>1066.8548</td><td>1088.4185</td><td>1095.6901</td></tr> <tr><td>1142.0120</td><td>1149.6672</td><td>1177.7649</td></tr> <tr><td>1196.8891</td><td>1237.3302</td><td>1245.0150</td></tr> <tr><td>1246.1807</td><td>1249.8651</td><td>1285.2098</td></tr> <tr><td>1294.3974</td><td>1334.3632</td><td>1337.5554</td></tr> <tr><td>1365.1458</td><td>1368.1285</td><td>1370.2336</td></tr> <tr><td>1371.9770</td><td>1453.9671</td><td>1462.2514</td></tr> <tr><td>1474.5510</td><td>1477.1829</td><td>1500.1896</td></tr> <tr><td>1520.9065</td><td>1651.6735</td><td>1664.5359</td></tr> <tr><td>3040.2763</td><td>3075.3613</td><td>3115.4136</td></tr> <tr><td>3126.9491</td><td>3140.0911</td><td>3154.2663</td></tr> <tr><td>3163.7816</td><td>3166.5864</td><td>3169.4363</td></tr> <tr><td>3174.7606</td><td>3176.1851</td><td>3184.6749</td></tr> <tr><td>3214.8120</td><td>3264.8363</td><td>3275.4659</td></tr> <tr><td>3286.3935</td><td>3293.3991</td><td>3826.6949</td></tr> </tbody> </table> | -403.7269 | 39.4494 | 43.4190 | 58.5135 | 75.4914 | 82.1553 | 91.2215 | 101.2886 | 117.1379 | 129.7231 | 137.8439 | 150.6632 | 165.7095 | 171.0236 | 177.9096 | 183.1308 | 190.9979 | 198.8810 | 216.4432 | 228.9438 | 238.2625 | 249.0338 | 274.7708 | 286.4805 | 298.4855 | 304.0179 | 311.7018 | 315.4731 | 323.4610 | 338.5417 | 372.1419 | 376.3348 | 437.0285 | 441.2549 | 464.7824 | 551.8564 | 577.3141 | 633.9556 | 657.6382 | 811.5085 | 838.4658 | 842.4375 | 844.5586 | 855.0881 | 880.8583 | 923.1106 | 953.4014 | 1005.2436 | 1036.2672 | 1038.0285 | 1042.0726 | 1049.7687 | 1055.4589 | 1059.8028 | 1066.8548 | 1088.4185 | 1095.6901 | 1142.0120 | 1149.6672 | 1177.7649 | 1196.8891 | 1237.3302 | 1245.0150 | 1246.1807 | 1249.8651 | 1285.2098 | 1294.3974 | 1334.3632 | 1337.5554 | 1365.1458 | 1368.1285 | 1370.2336 | 1371.9770 | 1453.9671 | 1462.2514 | 1474.5510 | 1477.1829 | 1500.1896 | 1520.9065 | 1651.6735 | 1664.5359 | 3040.2763 | 3075.3613 | 3115.4136 | 3126.9491 | 3140.0911 | 3154.2663 | 3163.7816 | 3166.5864 | 3169.4363 | 3174.7606 | 3176.1851 | 3184.6749 | 3214.8120 | 3264.8363 | 3275.4659 | 3286.3935 | 3293.3991 | 3826.6949 |
| Atoms              | X                                                                                                                                                                                                                                                                                                                                                                                                                                                                                                                                                                                                                                                                                                                                                                                                                                                                                                                                                                                                                                                                                                                                                                                                                                                                                                                                                                                                                                                                                                                                                                                                                                                                                                                                                                                                                                                                                                                                                                                                                                                                                                                                                                                                                                                                                                                                                                   | Y                                                                                  | Z        |   |   |   |          |          |         |   |          |          |         |    |          |          |          |    |          |          |         |    |         |          |          |   |         |          |         |   |          |          |         |   |          |          |          |   |         |          |          |    |         |         |          |    |         |          |         |   |         |         |          |   |         |         |         |   |         |         |         |   |         |          |         |   |         |          |         |   |         |         |         |   |          |         |          |   |         |         |         |   |          |         |         |   |          |         |          |   |          |         |          |   |          |         |          |   |         |         |         |   |          |         |         |   |          |         |         |   |          |         |         |   |          |         |         |   |          |         |         |   |          |         |         |                                                                                                                                                                                                                                                                                                                                                                                                                                                                                                                                                                                                                                                                                                                                                                                                                                                                                                                                                                                                                                                                                                                                                                                                                                                                                                                                                                                                                                                                                                                                                                                                                                                                                                                                                                                                                                                                                                                                                                                                                                                                                                                                                                                                                                                       |           |         |         |         |         |         |         |          |          |          |          |          |          |          |          |          |          |          |          |          |          |          |          |          |          |          |          |          |          |          |          |          |          |          |          |          |          |          |          |          |          |          |          |          |          |          |          |           |           |           |           |           |           |           |           |           |           |           |           |           |           |           |           |           |           |           |           |           |           |           |           |           |           |           |           |           |           |           |           |           |           |           |           |           |           |           |           |           |           |           |           |           |           |           |           |           |           |           |           |
| C                  | -0.82038                                                                                                                                                                                                                                                                                                                                                                                                                                                                                                                                                                                                                                                                                                                                                                                                                                                                                                                                                                                                                                                                                                                                                                                                                                                                                                                                                                                                                                                                                                                                                                                                                                                                                                                                                                                                                                                                                                                                                                                                                                                                                                                                                                                                                                                                                                                                                            | -2.95340                                                                           | 0.25706  |   |   |   |          |          |         |   |          |          |         |    |          |          |          |    |          |          |         |    |         |          |          |   |         |          |         |   |          |          |         |   |          |          |          |   |         |          |          |    |         |         |          |    |         |          |         |   |         |         |          |   |         |         |         |   |         |         |         |   |         |          |         |   |         |          |         |   |         |         |         |   |          |         |          |   |         |         |         |   |          |         |         |   |          |         |          |   |          |         |          |   |          |         |          |   |         |         |         |   |          |         |         |   |          |         |         |   |          |         |         |   |          |         |         |   |          |         |         |   |          |         |         |                                                                                                                                                                                                                                                                                                                                                                                                                                                                                                                                                                                                                                                                                                                                                                                                                                                                                                                                                                                                                                                                                                                                                                                                                                                                                                                                                                                                                                                                                                                                                                                                                                                                                                                                                                                                                                                                                                                                                                                                                                                                                                                                                                                                                                                       |           |         |         |         |         |         |         |          |          |          |          |          |          |          |          |          |          |          |          |          |          |          |          |          |          |          |          |          |          |          |          |          |          |          |          |          |          |          |          |          |          |          |          |          |          |          |          |           |           |           |           |           |           |           |           |           |           |           |           |           |           |           |           |           |           |           |           |           |           |           |           |           |           |           |           |           |           |           |           |           |           |           |           |           |           |           |           |           |           |           |           |           |           |           |           |           |           |           |           |
| C                  | -0.79550                                                                                                                                                                                                                                                                                                                                                                                                                                                                                                                                                                                                                                                                                                                                                                                                                                                                                                                                                                                                                                                                                                                                                                                                                                                                                                                                                                                                                                                                                                                                                                                                                                                                                                                                                                                                                                                                                                                                                                                                                                                                                                                                                                                                                                                                                                                                                            | -2.29322                                                                           | 1.43199  |   |   |   |          |          |         |   |          |          |         |    |          |          |          |    |          |          |         |    |         |          |          |   |         |          |         |   |          |          |         |   |          |          |          |   |         |          |          |    |         |         |          |    |         |          |         |   |         |         |          |   |         |         |         |   |         |         |         |   |         |          |         |   |         |          |         |   |         |         |         |   |          |         |          |   |         |         |         |   |          |         |         |   |          |         |          |   |          |         |          |   |          |         |          |   |         |         |         |   |          |         |         |   |          |         |         |   |          |         |         |   |          |         |         |   |          |         |         |   |          |         |         |                                                                                                                                                                                                                                                                                                                                                                                                                                                                                                                                                                                                                                                                                                                                                                                                                                                                                                                                                                                                                                                                                                                                                                                                                                                                                                                                                                                                                                                                                                                                                                                                                                                                                                                                                                                                                                                                                                                                                                                                                                                                                                                                                                                                                                                       |           |         |         |         |         |         |         |          |          |          |          |          |          |          |          |          |          |          |          |          |          |          |          |          |          |          |          |          |          |          |          |          |          |          |          |          |          |          |          |          |          |          |          |          |          |          |          |           |           |           |           |           |           |           |           |           |           |           |           |           |           |           |           |           |           |           |           |           |           |           |           |           |           |           |           |           |           |           |           |           |           |           |           |           |           |           |           |           |           |           |           |           |           |           |           |           |           |           |           |
| Pt                 | -1.30935                                                                                                                                                                                                                                                                                                                                                                                                                                                                                                                                                                                                                                                                                                                                                                                                                                                                                                                                                                                                                                                                                                                                                                                                                                                                                                                                                                                                                                                                                                                                                                                                                                                                                                                                                                                                                                                                                                                                                                                                                                                                                                                                                                                                                                                                                                                                                            | -0.52083                                                                           | -0.40665 |   |   |   |          |          |         |   |          |          |         |    |          |          |          |    |          |          |         |    |         |          |          |   |         |          |         |   |          |          |         |   |          |          |          |   |         |          |          |    |         |         |          |    |         |          |         |   |         |         |          |   |         |         |         |   |         |         |         |   |         |          |         |   |         |          |         |   |         |         |         |   |          |         |          |   |         |         |         |   |          |         |         |   |          |         |          |   |          |         |          |   |          |         |          |   |         |         |         |   |          |         |         |   |          |         |         |   |          |         |         |   |          |         |         |   |          |         |         |   |          |         |         |                                                                                                                                                                                                                                                                                                                                                                                                                                                                                                                                                                                                                                                                                                                                                                                                                                                                                                                                                                                                                                                                                                                                                                                                                                                                                                                                                                                                                                                                                                                                                                                                                                                                                                                                                                                                                                                                                                                                                                                                                                                                                                                                                                                                                                                       |           |         |         |         |         |         |         |          |          |          |          |          |          |          |          |          |          |          |          |          |          |          |          |          |          |          |          |          |          |          |          |          |          |          |          |          |          |          |          |          |          |          |          |          |          |          |          |           |           |           |           |           |           |           |           |           |           |           |           |           |           |           |           |           |           |           |           |           |           |           |           |           |           |           |           |           |           |           |           |           |           |           |           |           |           |           |           |           |           |           |           |           |           |           |           |           |           |           |           |
| Cl                 | -3.52656                                                                                                                                                                                                                                                                                                                                                                                                                                                                                                                                                                                                                                                                                                                                                                                                                                                                                                                                                                                                                                                                                                                                                                                                                                                                                                                                                                                                                                                                                                                                                                                                                                                                                                                                                                                                                                                                                                                                                                                                                                                                                                                                                                                                                                                                                                                                                            | -0.72826                                                                           | 0.29133  |   |   |   |          |          |         |   |          |          |         |    |          |          |          |    |          |          |         |    |         |          |          |   |         |          |         |   |          |          |         |   |          |          |          |   |         |          |          |    |         |         |          |    |         |          |         |   |         |         |          |   |         |         |         |   |         |         |         |   |         |          |         |   |         |          |         |   |         |         |         |   |          |         |          |   |         |         |         |   |          |         |         |   |          |         |          |   |          |         |          |   |          |         |          |   |         |         |         |   |          |         |         |   |          |         |         |   |          |         |         |   |          |         |         |   |          |         |         |   |          |         |         |                                                                                                                                                                                                                                                                                                                                                                                                                                                                                                                                                                                                                                                                                                                                                                                                                                                                                                                                                                                                                                                                                                                                                                                                                                                                                                                                                                                                                                                                                                                                                                                                                                                                                                                                                                                                                                                                                                                                                                                                                                                                                                                                                                                                                                                       |           |         |         |         |         |         |         |          |          |          |          |          |          |          |          |          |          |          |          |          |          |          |          |          |          |          |          |          |          |          |          |          |          |          |          |          |          |          |          |          |          |          |          |          |          |          |          |           |           |           |           |           |           |           |           |           |           |           |           |           |           |           |           |           |           |           |           |           |           |           |           |           |           |           |           |           |           |           |           |           |           |           |           |           |           |           |           |           |           |           |           |           |           |           |           |           |           |           |           |
| Cl                 | 0.79130                                                                                                                                                                                                                                                                                                                                                                                                                                                                                                                                                                                                                                                                                                                                                                                                                                                                                                                                                                                                                                                                                                                                                                                                                                                                                                                                                                                                                                                                                                                                                                                                                                                                                                                                                                                                                                                                                                                                                                                                                                                                                                                                                                                                                                                                                                                                                             | -0.49097                                                                           | -1.59236 |   |   |   |          |          |         |   |          |          |         |    |          |          |          |    |          |          |         |    |         |          |          |   |         |          |         |   |          |          |         |   |          |          |          |   |         |          |          |    |         |         |          |    |         |          |         |   |         |         |          |   |         |         |         |   |         |         |         |   |         |          |         |   |         |          |         |   |         |         |         |   |          |         |          |   |         |         |         |   |          |         |         |   |          |         |          |   |          |         |          |   |          |         |          |   |         |         |         |   |          |         |         |   |          |         |         |   |          |         |         |   |          |         |         |   |          |         |         |   |          |         |         |                                                                                                                                                                                                                                                                                                                                                                                                                                                                                                                                                                                                                                                                                                                                                                                                                                                                                                                                                                                                                                                                                                                                                                                                                                                                                                                                                                                                                                                                                                                                                                                                                                                                                                                                                                                                                                                                                                                                                                                                                                                                                                                                                                                                                                                       |           |         |         |         |         |         |         |          |          |          |          |          |          |          |          |          |          |          |          |          |          |          |          |          |          |          |          |          |          |          |          |          |          |          |          |          |          |          |          |          |          |          |          |          |          |          |          |           |           |           |           |           |           |           |           |           |           |           |           |           |           |           |           |           |           |           |           |           |           |           |           |           |           |           |           |           |           |           |           |           |           |           |           |           |           |           |           |           |           |           |           |           |           |           |           |           |           |           |           |
| H                  | 0.14791                                                                                                                                                                                                                                                                                                                                                                                                                                                                                                                                                                                                                                                                                                                                                                                                                                                                                                                                                                                                                                                                                                                                                                                                                                                                                                                                                                                                                                                                                                                                                                                                                                                                                                                                                                                                                                                                                                                                                                                                                                                                                                                                                                                                                                                                                                                                                             | -1.93357                                                                           | 1.83339  |   |   |   |          |          |         |   |          |          |         |    |          |          |          |    |          |          |         |    |         |          |          |   |         |          |         |   |          |          |         |   |          |          |          |   |         |          |          |    |         |         |          |    |         |          |         |   |         |         |          |   |         |         |         |   |         |         |         |   |         |          |         |   |         |          |         |   |         |         |         |   |          |         |          |   |         |         |         |   |          |         |         |   |          |         |          |   |          |         |          |   |          |         |          |   |         |         |         |   |          |         |         |   |          |         |         |   |          |         |         |   |          |         |         |   |          |         |         |   |          |         |         |                                                                                                                                                                                                                                                                                                                                                                                                                                                                                                                                                                                                                                                                                                                                                                                                                                                                                                                                                                                                                                                                                                                                                                                                                                                                                                                                                                                                                                                                                                                                                                                                                                                                                                                                                                                                                                                                                                                                                                                                                                                                                                                                                                                                                                                       |           |         |         |         |         |         |         |          |          |          |          |          |          |          |          |          |          |          |          |          |          |          |          |          |          |          |          |          |          |          |          |          |          |          |          |          |          |          |          |          |          |          |          |          |          |          |          |           |           |           |           |           |           |           |           |           |           |           |           |           |           |           |           |           |           |           |           |           |           |           |           |           |           |           |           |           |           |           |           |           |           |           |           |           |           |           |           |           |           |           |           |           |           |           |           |           |           |           |           |
| H                  | -1.70277                                                                                                                                                                                                                                                                                                                                                                                                                                                                                                                                                                                                                                                                                                                                                                                                                                                                                                                                                                                                                                                                                                                                                                                                                                                                                                                                                                                                                                                                                                                                                                                                                                                                                                                                                                                                                                                                                                                                                                                                                                                                                                                                                                                                                                                                                                                                                            | -2.15943                                                                           | 2.01477  |   |   |   |          |          |         |   |          |          |         |    |          |          |          |    |          |          |         |    |         |          |          |   |         |          |         |   |          |          |         |   |          |          |          |   |         |          |          |    |         |         |          |    |         |          |         |   |         |         |          |   |         |         |         |   |         |         |         |   |         |          |         |   |         |          |         |   |         |         |         |   |          |         |          |   |         |         |         |   |          |         |         |   |          |         |          |   |          |         |          |   |          |         |          |   |         |         |         |   |          |         |         |   |          |         |         |   |          |         |         |   |          |         |         |   |          |         |         |   |          |         |         |                                                                                                                                                                                                                                                                                                                                                                                                                                                                                                                                                                                                                                                                                                                                                                                                                                                                                                                                                                                                                                                                                                                                                                                                                                                                                                                                                                                                                                                                                                                                                                                                                                                                                                                                                                                                                                                                                                                                                                                                                                                                                                                                                                                                                                                       |           |         |         |         |         |         |         |          |          |          |          |          |          |          |          |          |          |          |          |          |          |          |          |          |          |          |          |          |          |          |          |          |          |          |          |          |          |          |          |          |          |          |          |          |          |          |          |           |           |           |           |           |           |           |           |           |           |           |           |           |           |           |           |           |           |           |           |           |           |           |           |           |           |           |           |           |           |           |           |           |           |           |           |           |           |           |           |           |           |           |           |           |           |           |           |           |           |           |           |
| H                  | -1.74572                                                                                                                                                                                                                                                                                                                                                                                                                                                                                                                                                                                                                                                                                                                                                                                                                                                                                                                                                                                                                                                                                                                                                                                                                                                                                                                                                                                                                                                                                                                                                                                                                                                                                                                                                                                                                                                                                                                                                                                                                                                                                                                                                                                                                                                                                                                                                            | -3.37958                                                                           | -0.12515 |   |   |   |          |          |         |   |          |          |         |    |          |          |          |    |          |          |         |    |         |          |          |   |         |          |         |   |          |          |         |   |          |          |          |   |         |          |          |    |         |         |          |    |         |          |         |   |         |         |          |   |         |         |         |   |         |         |         |   |         |          |         |   |         |          |         |   |         |         |         |   |          |         |          |   |         |         |         |   |          |         |         |   |          |         |          |   |          |         |          |   |          |         |          |   |         |         |         |   |          |         |         |   |          |         |         |   |          |         |         |   |          |         |         |   |          |         |         |   |          |         |         |                                                                                                                                                                                                                                                                                                                                                                                                                                                                                                                                                                                                                                                                                                                                                                                                                                                                                                                                                                                                                                                                                                                                                                                                                                                                                                                                                                                                                                                                                                                                                                                                                                                                                                                                                                                                                                                                                                                                                                                                                                                                                                                                                                                                                                                       |           |         |         |         |         |         |         |          |          |          |          |          |          |          |          |          |          |          |          |          |          |          |          |          |          |          |          |          |          |          |          |          |          |          |          |          |          |          |          |          |          |          |          |          |          |          |          |           |           |           |           |           |           |           |           |           |           |           |           |           |           |           |           |           |           |           |           |           |           |           |           |           |           |           |           |           |           |           |           |           |           |           |           |           |           |           |           |           |           |           |           |           |           |           |           |           |           |           |           |
| H                  | 0.10363                                                                                                                                                                                                                                                                                                                                                                                                                                                                                                                                                                                                                                                                                                                                                                                                                                                                                                                                                                                                                                                                                                                                                                                                                                                                                                                                                                                                                                                                                                                                                                                                                                                                                                                                                                                                                                                                                                                                                                                                                                                                                                                                                                                                                                                                                                                                                             | -3.13477                                                                           | -0.28584 |   |   |   |          |          |         |   |          |          |         |    |          |          |          |    |          |          |         |    |         |          |          |   |         |          |         |   |          |          |         |   |          |          |          |   |         |          |          |    |         |         |          |    |         |          |         |   |         |         |          |   |         |         |         |   |         |         |         |   |         |          |         |   |         |          |         |   |         |         |         |   |          |         |          |   |         |         |         |   |          |         |         |   |          |         |          |   |          |         |          |   |          |         |          |   |         |         |         |   |          |         |         |   |          |         |         |   |          |         |         |   |          |         |         |   |          |         |         |   |          |         |         |                                                                                                                                                                                                                                                                                                                                                                                                                                                                                                                                                                                                                                                                                                                                                                                                                                                                                                                                                                                                                                                                                                                                                                                                                                                                                                                                                                                                                                                                                                                                                                                                                                                                                                                                                                                                                                                                                                                                                                                                                                                                                                                                                                                                                                                       |           |         |         |         |         |         |         |          |          |          |          |          |          |          |          |          |          |          |          |          |          |          |          |          |          |          |          |          |          |          |          |          |          |          |          |          |          |          |          |          |          |          |          |          |          |          |          |           |           |           |           |           |           |           |           |           |           |           |           |           |           |           |           |           |           |           |           |           |           |           |           |           |           |           |           |           |           |           |           |           |           |           |           |           |           |           |           |           |           |           |           |           |           |           |           |           |           |           |           |
| Cl                 | 2.66038                                                                                                                                                                                                                                                                                                                                                                                                                                                                                                                                                                                                                                                                                                                                                                                                                                                                                                                                                                                                                                                                                                                                                                                                                                                                                                                                                                                                                                                                                                                                                                                                                                                                                                                                                                                                                                                                                                                                                                                                                                                                                                                                                                                                                                                                                                                                                             | 2.12762                                                                            | -0.82465 |   |   |   |          |          |         |   |          |          |         |    |          |          |          |    |          |          |         |    |         |          |          |   |         |          |         |   |          |          |         |   |          |          |          |   |         |          |          |    |         |         |          |    |         |          |         |   |         |         |          |   |         |         |         |   |         |         |         |   |         |          |         |   |         |          |         |   |         |         |         |   |          |         |          |   |         |         |         |   |          |         |         |   |          |         |          |   |          |         |          |   |          |         |          |   |         |         |         |   |          |         |         |   |          |         |         |   |          |         |         |   |          |         |         |   |          |         |         |   |          |         |         |                                                                                                                                                                                                                                                                                                                                                                                                                                                                                                                                                                                                                                                                                                                                                                                                                                                                                                                                                                                                                                                                                                                                                                                                                                                                                                                                                                                                                                                                                                                                                                                                                                                                                                                                                                                                                                                                                                                                                                                                                                                                                                                                                                                                                                                       |           |         |         |         |         |         |         |          |          |          |          |          |          |          |          |          |          |          |          |          |          |          |          |          |          |          |          |          |          |          |          |          |          |          |          |          |          |          |          |          |          |          |          |          |          |          |          |           |           |           |           |           |           |           |           |           |           |           |           |           |           |           |           |           |           |           |           |           |           |           |           |           |           |           |           |           |           |           |           |           |           |           |           |           |           |           |           |           |           |           |           |           |           |           |           |           |           |           |           |
| Cl                 | 2.53035                                                                                                                                                                                                                                                                                                                                                                                                                                                                                                                                                                                                                                                                                                                                                                                                                                                                                                                                                                                                                                                                                                                                                                                                                                                                                                                                                                                                                                                                                                                                                                                                                                                                                                                                                                                                                                                                                                                                                                                                                                                                                                                                                                                                                                                                                                                                                             | -2.08805                                                                           | 0.67472  |   |   |   |          |          |         |   |          |          |         |    |          |          |          |    |          |          |         |    |         |          |          |   |         |          |         |   |          |          |         |   |          |          |          |   |         |          |          |    |         |         |          |    |         |          |         |   |         |         |          |   |         |         |         |   |         |         |         |   |         |          |         |   |         |          |         |   |         |         |         |   |          |         |          |   |         |         |         |   |          |         |         |   |          |         |          |   |          |         |          |   |          |         |          |   |         |         |         |   |          |         |         |   |          |         |         |   |          |         |         |   |          |         |         |   |          |         |         |   |          |         |         |                                                                                                                                                                                                                                                                                                                                                                                                                                                                                                                                                                                                                                                                                                                                                                                                                                                                                                                                                                                                                                                                                                                                                                                                                                                                                                                                                                                                                                                                                                                                                                                                                                                                                                                                                                                                                                                                                                                                                                                                                                                                                                                                                                                                                                                       |           |         |         |         |         |         |         |          |          |          |          |          |          |          |          |          |          |          |          |          |          |          |          |          |          |          |          |          |          |          |          |          |          |          |          |          |          |          |          |          |          |          |          |          |          |          |          |           |           |           |           |           |           |           |           |           |           |           |           |           |           |           |           |           |           |           |           |           |           |           |           |           |           |           |           |           |           |           |           |           |           |           |           |           |           |           |           |           |           |           |           |           |           |           |           |           |           |           |           |
| H                  | 5.08367                                                                                                                                                                                                                                                                                                                                                                                                                                                                                                                                                                                                                                                                                                                                                                                                                                                                                                                                                                                                                                                                                                                                                                                                                                                                                                                                                                                                                                                                                                                                                                                                                                                                                                                                                                                                                                                                                                                                                                                                                                                                                                                                                                                                                                                                                                                                                             | 0.81532                                                                            | -0.40305 |   |   |   |          |          |         |   |          |          |         |    |          |          |          |    |          |          |         |    |         |          |          |   |         |          |         |   |          |          |         |   |          |          |          |   |         |          |          |    |         |         |          |    |         |          |         |   |         |         |          |   |         |         |         |   |         |         |         |   |         |          |         |   |         |          |         |   |         |         |         |   |          |         |          |   |         |         |         |   |          |         |         |   |          |         |          |   |          |         |          |   |          |         |          |   |         |         |         |   |          |         |         |   |          |         |         |   |          |         |         |   |          |         |         |   |          |         |         |   |          |         |         |                                                                                                                                                                                                                                                                                                                                                                                                                                                                                                                                                                                                                                                                                                                                                                                                                                                                                                                                                                                                                                                                                                                                                                                                                                                                                                                                                                                                                                                                                                                                                                                                                                                                                                                                                                                                                                                                                                                                                                                                                                                                                                                                                                                                                                                       |           |         |         |         |         |         |         |          |          |          |          |          |          |          |          |          |          |          |          |          |          |          |          |          |          |          |          |          |          |          |          |          |          |          |          |          |          |          |          |          |          |          |          |          |          |          |          |           |           |           |           |           |           |           |           |           |           |           |           |           |           |           |           |           |           |           |           |           |           |           |           |           |           |           |           |           |           |           |           |           |           |           |           |           |           |           |           |           |           |           |           |           |           |           |           |           |           |           |           |
| C                  | 4.76096                                                                                                                                                                                                                                                                                                                                                                                                                                                                                                                                                                                                                                                                                                                                                                                                                                                                                                                                                                                                                                                                                                                                                                                                                                                                                                                                                                                                                                                                                                                                                                                                                                                                                                                                                                                                                                                                                                                                                                                                                                                                                                                                                                                                                                                                                                                                                             | 0.09893                                                                            | 0.34621  |   |   |   |          |          |         |   |          |          |         |    |          |          |          |    |          |          |         |    |         |          |          |   |         |          |         |   |          |          |         |   |          |          |          |   |         |          |          |    |         |         |          |    |         |          |         |   |         |         |          |   |         |         |         |   |         |         |         |   |         |          |         |   |         |          |         |   |         |         |         |   |          |         |          |   |         |         |         |   |          |         |         |   |          |         |          |   |          |         |          |   |          |         |          |   |         |         |         |   |          |         |         |   |          |         |         |   |          |         |         |   |          |         |         |   |          |         |         |   |          |         |         |                                                                                                                                                                                                                                                                                                                                                                                                                                                                                                                                                                                                                                                                                                                                                                                                                                                                                                                                                                                                                                                                                                                                                                                                                                                                                                                                                                                                                                                                                                                                                                                                                                                                                                                                                                                                                                                                                                                                                                                                                                                                                                                                                                                                                                                       |           |         |         |         |         |         |         |          |          |          |          |          |          |          |          |          |          |          |          |          |          |          |          |          |          |          |          |          |          |          |          |          |          |          |          |          |          |          |          |          |          |          |          |          |          |          |          |           |           |           |           |           |           |           |           |           |           |           |           |           |           |           |           |           |           |           |           |           |           |           |           |           |           |           |           |           |           |           |           |           |           |           |           |           |           |           |           |           |           |           |           |           |           |           |           |           |           |           |           |
| C                  | 4.10097                                                                                                                                                                                                                                                                                                                                                                                                                                                                                                                                                                                                                                                                                                                                                                                                                                                                                                                                                                                                                                                                                                                                                                                                                                                                                                                                                                                                                                                                                                                                                                                                                                                                                                                                                                                                                                                                                                                                                                                                                                                                                                                                                                                                                                                                                                                                                             | 0.51197                                                                            | 1.45443  |   |   |   |          |          |         |   |          |          |         |    |          |          |          |    |          |          |         |    |         |          |          |   |         |          |         |   |          |          |         |   |          |          |          |   |         |          |          |    |         |         |          |    |         |          |         |   |         |         |          |   |         |         |         |   |         |         |         |   |         |          |         |   |         |          |         |   |         |         |         |   |          |         |          |   |         |         |         |   |          |         |         |   |          |         |          |   |          |         |          |   |          |         |          |   |         |         |         |   |          |         |         |   |          |         |         |   |          |         |         |   |          |         |         |   |          |         |         |   |          |         |         |                                                                                                                                                                                                                                                                                                                                                                                                                                                                                                                                                                                                                                                                                                                                                                                                                                                                                                                                                                                                                                                                                                                                                                                                                                                                                                                                                                                                                                                                                                                                                                                                                                                                                                                                                                                                                                                                                                                                                                                                                                                                                                                                                                                                                                                       |           |         |         |         |         |         |         |          |          |          |          |          |          |          |          |          |          |          |          |          |          |          |          |          |          |          |          |          |          |          |          |          |          |          |          |          |          |          |          |          |          |          |          |          |          |          |          |           |           |           |           |           |           |           |           |           |           |           |           |           |           |           |           |           |           |           |           |           |           |           |           |           |           |           |           |           |           |           |           |           |           |           |           |           |           |           |           |           |           |           |           |           |           |           |           |           |           |           |           |
| H                  | 5.01872                                                                                                                                                                                                                                                                                                                                                                                                                                                                                                                                                                                                                                                                                                                                                                                                                                                                                                                                                                                                                                                                                                                                                                                                                                                                                                                                                                                                                                                                                                                                                                                                                                                                                                                                                                                                                                                                                                                                                                                                                                                                                                                                                                                                                                                                                                                                                             | -0.94737                                                                           | 0.21441  |   |   |   |          |          |         |   |          |          |         |    |          |          |          |    |          |          |         |    |         |          |          |   |         |          |         |   |          |          |         |   |          |          |          |   |         |          |          |    |         |         |          |    |         |          |         |   |         |         |          |   |         |         |         |   |         |         |         |   |         |          |         |   |         |          |         |   |         |         |         |   |          |         |          |   |         |         |         |   |          |         |         |   |          |         |          |   |          |         |          |   |          |         |          |   |         |         |         |   |          |         |         |   |          |         |         |   |          |         |         |   |          |         |         |   |          |         |         |   |          |         |         |                                                                                                                                                                                                                                                                                                                                                                                                                                                                                                                                                                                                                                                                                                                                                                                                                                                                                                                                                                                                                                                                                                                                                                                                                                                                                                                                                                                                                                                                                                                                                                                                                                                                                                                                                                                                                                                                                                                                                                                                                                                                                                                                                                                                                                                       |           |         |         |         |         |         |         |          |          |          |          |          |          |          |          |          |          |          |          |          |          |          |          |          |          |          |          |          |          |          |          |          |          |          |          |          |          |          |          |          |          |          |          |          |          |          |          |           |           |           |           |           |           |           |           |           |           |           |           |           |           |           |           |           |           |           |           |           |           |           |           |           |           |           |           |           |           |           |           |           |           |           |           |           |           |           |           |           |           |           |           |           |           |           |           |           |           |           |           |
| H                  | 3.83113                                                                                                                                                                                                                                                                                                                                                                                                                                                                                                                                                                                                                                                                                                                                                                                                                                                                                                                                                                                                                                                                                                                                                                                                                                                                                                                                                                                                                                                                                                                                                                                                                                                                                                                                                                                                                                                                                                                                                                                                                                                                                                                                                                                                                                                                                                                                                             | -0.19710                                                                           | 2.23106  |   |   |   |          |          |         |   |          |          |         |    |          |          |          |    |          |          |         |    |         |          |          |   |         |          |         |   |          |          |         |   |          |          |          |   |         |          |          |    |         |         |          |    |         |          |         |   |         |         |          |   |         |         |         |   |         |         |         |   |         |          |         |   |         |          |         |   |         |         |         |   |          |         |          |   |         |         |         |   |          |         |         |   |          |         |          |   |          |         |          |   |          |         |          |   |         |         |         |   |          |         |         |   |          |         |         |   |          |         |         |   |          |         |         |   |          |         |         |   |          |         |         |                                                                                                                                                                                                                                                                                                                                                                                                                                                                                                                                                                                                                                                                                                                                                                                                                                                                                                                                                                                                                                                                                                                                                                                                                                                                                                                                                                                                                                                                                                                                                                                                                                                                                                                                                                                                                                                                                                                                                                                                                                                                                                                                                                                                                                                       |           |         |         |         |         |         |         |          |          |          |          |          |          |          |          |          |          |          |          |          |          |          |          |          |          |          |          |          |          |          |          |          |          |          |          |          |          |          |          |          |          |          |          |          |          |          |          |           |           |           |           |           |           |           |           |           |           |           |           |           |           |           |           |           |           |           |           |           |           |           |           |           |           |           |           |           |           |           |           |           |           |           |           |           |           |           |           |           |           |           |           |           |           |           |           |           |           |           |           |
| H                  | 3.90350                                                                                                                                                                                                                                                                                                                                                                                                                                                                                                                                                                                                                                                                                                                                                                                                                                                                                                                                                                                                                                                                                                                                                                                                                                                                                                                                                                                                                                                                                                                                                                                                                                                                                                                                                                                                                                                                                                                                                                                                                                                                                                                                                                                                                                                                                                                                                             | 1.56818                                                                            | 1.60956  |   |   |   |          |          |         |   |          |          |         |    |          |          |          |    |          |          |         |    |         |          |          |   |         |          |         |   |          |          |         |   |          |          |          |   |         |          |          |    |         |         |          |    |         |          |         |   |         |         |          |   |         |         |         |   |         |         |         |   |         |          |         |   |         |          |         |   |         |         |         |   |          |         |          |   |         |         |         |   |          |         |         |   |          |         |          |   |          |         |          |   |          |         |          |   |         |         |         |   |          |         |         |   |          |         |         |   |          |         |         |   |          |         |         |   |          |         |         |   |          |         |         |                                                                                                                                                                                                                                                                                                                                                                                                                                                                                                                                                                                                                                                                                                                                                                                                                                                                                                                                                                                                                                                                                                                                                                                                                                                                                                                                                                                                                                                                                                                                                                                                                                                                                                                                                                                                                                                                                                                                                                                                                                                                                                                                                                                                                                                       |           |         |         |         |         |         |         |          |          |          |          |          |          |          |          |          |          |          |          |          |          |          |          |          |          |          |          |          |          |          |          |          |          |          |          |          |          |          |          |          |          |          |          |          |          |          |          |           |           |           |           |           |           |           |           |           |           |           |           |           |           |           |           |           |           |           |           |           |           |           |           |           |           |           |           |           |           |           |           |           |           |           |           |           |           |           |           |           |           |           |           |           |           |           |           |           |           |           |           |
| C                  | -0.90735                                                                                                                                                                                                                                                                                                                                                                                                                                                                                                                                                                                                                                                                                                                                                                                                                                                                                                                                                                                                                                                                                                                                                                                                                                                                                                                                                                                                                                                                                                                                                                                                                                                                                                                                                                                                                                                                                                                                                                                                                                                                                                                                                                                                                                                                                                                                                            | 2.12283                                                                            | -0.33706 |   |   |   |          |          |         |   |          |          |         |    |          |          |          |    |          |          |         |    |         |          |          |   |         |          |         |   |          |          |         |   |          |          |          |   |         |          |          |    |         |         |          |    |         |          |         |   |         |         |          |   |         |         |         |   |         |         |         |   |         |          |         |   |         |          |         |   |         |         |         |   |          |         |          |   |         |         |         |   |          |         |         |   |          |         |          |   |          |         |          |   |          |         |          |   |         |         |         |   |          |         |         |   |          |         |         |   |          |         |         |   |          |         |         |   |          |         |         |   |          |         |         |                                                                                                                                                                                                                                                                                                                                                                                                                                                                                                                                                                                                                                                                                                                                                                                                                                                                                                                                                                                                                                                                                                                                                                                                                                                                                                                                                                                                                                                                                                                                                                                                                                                                                                                                                                                                                                                                                                                                                                                                                                                                                                                                                                                                                                                       |           |         |         |         |         |         |         |          |          |          |          |          |          |          |          |          |          |          |          |          |          |          |          |          |          |          |          |          |          |          |          |          |          |          |          |          |          |          |          |          |          |          |          |          |          |          |          |           |           |           |           |           |           |           |           |           |           |           |           |           |           |           |           |           |           |           |           |           |           |           |           |           |           |           |           |           |           |           |           |           |           |           |           |           |           |           |           |           |           |           |           |           |           |           |           |           |           |           |           |
| O                  | 0.52606                                                                                                                                                                                                                                                                                                                                                                                                                                                                                                                                                                                                                                                                                                                                                                                                                                                                                                                                                                                                                                                                                                                                                                                                                                                                                                                                                                                                                                                                                                                                                                                                                                                                                                                                                                                                                                                                                                                                                                                                                                                                                                                                                                                                                                                                                                                                                             | 0.72654                                                                            | 1.22991  |   |   |   |          |          |         |   |          |          |         |    |          |          |          |    |          |          |         |    |         |          |          |   |         |          |         |   |          |          |         |   |          |          |          |   |         |          |          |    |         |         |          |    |         |          |         |   |         |         |          |   |         |         |         |   |         |         |         |   |         |          |         |   |         |          |         |   |         |         |         |   |          |         |          |   |         |         |         |   |          |         |         |   |          |         |          |   |          |         |          |   |          |         |          |   |         |         |         |   |          |         |         |   |          |         |         |   |          |         |         |   |          |         |         |   |          |         |         |   |          |         |         |                                                                                                                                                                                                                                                                                                                                                                                                                                                                                                                                                                                                                                                                                                                                                                                                                                                                                                                                                                                                                                                                                                                                                                                                                                                                                                                                                                                                                                                                                                                                                                                                                                                                                                                                                                                                                                                                                                                                                                                                                                                                                                                                                                                                                                                       |           |         |         |         |         |         |         |          |          |          |          |          |          |          |          |          |          |          |          |          |          |          |          |          |          |          |          |          |          |          |          |          |          |          |          |          |          |          |          |          |          |          |          |          |          |          |          |           |           |           |           |           |           |           |           |           |           |           |           |           |           |           |           |           |           |           |           |           |           |           |           |           |           |           |           |           |           |           |           |           |           |           |           |           |           |           |           |           |           |           |           |           |           |           |           |           |           |           |           |
| C                  | -0.73763                                                                                                                                                                                                                                                                                                                                                                                                                                                                                                                                                                                                                                                                                                                                                                                                                                                                                                                                                                                                                                                                                                                                                                                                                                                                                                                                                                                                                                                                                                                                                                                                                                                                                                                                                                                                                                                                                                                                                                                                                                                                                                                                                                                                                                                                                                                                                            | 1.08932                                                                            | 0.78797  |   |   |   |          |          |         |   |          |          |         |    |          |          |          |    |          |          |         |    |         |          |          |   |         |          |         |   |          |          |         |   |          |          |          |   |         |          |          |    |         |         |          |    |         |          |         |   |         |         |          |   |         |         |         |   |         |         |         |   |         |          |         |   |         |          |         |   |         |         |         |   |          |         |          |   |         |         |         |   |          |         |         |   |          |         |          |   |          |         |          |   |          |         |          |   |         |         |         |   |          |         |         |   |          |         |         |   |          |         |         |   |          |         |         |   |          |         |         |   |          |         |         |                                                                                                                                                                                                                                                                                                                                                                                                                                                                                                                                                                                                                                                                                                                                                                                                                                                                                                                                                                                                                                                                                                                                                                                                                                                                                                                                                                                                                                                                                                                                                                                                                                                                                                                                                                                                                                                                                                                                                                                                                                                                                                                                                                                                                                                       |           |         |         |         |         |         |         |          |          |          |          |          |          |          |          |          |          |          |          |          |          |          |          |          |          |          |          |          |          |          |          |          |          |          |          |          |          |          |          |          |          |          |          |          |          |          |          |           |           |           |           |           |           |           |           |           |           |           |           |           |           |           |           |           |           |           |           |           |           |           |           |           |           |           |           |           |           |           |           |           |           |           |           |           |           |           |           |           |           |           |           |           |           |           |           |           |           |           |           |
| C                  | -1.69020                                                                                                                                                                                                                                                                                                                                                                                                                                                                                                                                                                                                                                                                                                                                                                                                                                                                                                                                                                                                                                                                                                                                                                                                                                                                                                                                                                                                                                                                                                                                                                                                                                                                                                                                                                                                                                                                                                                                                                                                                                                                                                                                                                                                                                                                                                                                                            | 1.25081                                                                            | -1.33064 |   |   |   |          |          |         |   |          |          |         |    |          |          |          |    |          |          |         |    |         |          |          |   |         |          |         |   |          |          |         |   |          |          |          |   |         |          |          |    |         |         |          |    |         |          |         |   |         |         |          |   |         |         |         |   |         |         |         |   |         |          |         |   |         |          |         |   |         |         |         |   |          |         |          |   |         |         |         |   |          |         |         |   |          |         |          |   |          |         |          |   |          |         |          |   |         |         |         |   |          |         |         |   |          |         |         |   |          |         |         |   |          |         |         |   |          |         |         |   |          |         |         |                                                                                                                                                                                                                                                                                                                                                                                                                                                                                                                                                                                                                                                                                                                                                                                                                                                                                                                                                                                                                                                                                                                                                                                                                                                                                                                                                                                                                                                                                                                                                                                                                                                                                                                                                                                                                                                                                                                                                                                                                                                                                                                                                                                                                                                       |           |         |         |         |         |         |         |          |          |          |          |          |          |          |          |          |          |          |          |          |          |          |          |          |          |          |          |          |          |          |          |          |          |          |          |          |          |          |          |          |          |          |          |          |          |          |          |           |           |           |           |           |           |           |           |           |           |           |           |           |           |           |           |           |           |           |           |           |           |           |           |           |           |           |           |           |           |           |           |           |           |           |           |           |           |           |           |           |           |           |           |           |           |           |           |           |           |           |           |
| H                  | -2.76706                                                                                                                                                                                                                                                                                                                                                                                                                                                                                                                                                                                                                                                                                                                                                                                                                                                                                                                                                                                                                                                                                                                                                                                                                                                                                                                                                                                                                                                                                                                                                                                                                                                                                                                                                                                                                                                                                                                                                                                                                                                                                                                                                                                                                                                                                                                                                            | 1.41921                                                                            | -1.33404 |   |   |   |          |          |         |   |          |          |         |    |          |          |          |    |          |          |         |    |         |          |          |   |         |          |         |   |          |          |         |   |          |          |          |   |         |          |          |    |         |         |          |    |         |          |         |   |         |         |          |   |         |         |         |   |         |         |         |   |         |          |         |   |         |          |         |   |         |         |         |   |          |         |          |   |         |         |         |   |          |         |         |   |          |         |          |   |          |         |          |   |          |         |          |   |         |         |         |   |          |         |         |   |          |         |         |   |          |         |         |   |          |         |         |   |          |         |         |   |          |         |         |                                                                                                                                                                                                                                                                                                                                                                                                                                                                                                                                                                                                                                                                                                                                                                                                                                                                                                                                                                                                                                                                                                                                                                                                                                                                                                                                                                                                                                                                                                                                                                                                                                                                                                                                                                                                                                                                                                                                                                                                                                                                                                                                                                                                                                                       |           |         |         |         |         |         |         |          |          |          |          |          |          |          |          |          |          |          |          |          |          |          |          |          |          |          |          |          |          |          |          |          |          |          |          |          |          |          |          |          |          |          |          |          |          |          |          |           |           |           |           |           |           |           |           |           |           |           |           |           |           |           |           |           |           |           |           |           |           |           |           |           |           |           |           |           |           |           |           |           |           |           |           |           |           |           |           |           |           |           |           |           |           |           |           |           |           |           |           |
| H                  | -1.26693                                                                                                                                                                                                                                                                                                                                                                                                                                                                                                                                                                                                                                                                                                                                                                                                                                                                                                                                                                                                                                                                                                                                                                                                                                                                                                                                                                                                                                                                                                                                                                                                                                                                                                                                                                                                                                                                                                                                                                                                                                                                                                                                                                                                                                                                                                                                                            | 1.21075                                                                            | -2.33323 |   |   |   |          |          |         |   |          |          |         |    |          |          |          |    |          |          |         |    |         |          |          |   |         |          |         |   |          |          |         |   |          |          |          |   |         |          |          |    |         |         |          |    |         |          |         |   |         |         |          |   |         |         |         |   |         |         |         |   |         |          |         |   |         |          |         |   |         |         |         |   |          |         |          |   |         |         |         |   |          |         |         |   |          |         |          |   |          |         |          |   |          |         |          |   |         |         |         |   |          |         |         |   |          |         |         |   |          |         |         |   |          |         |         |   |          |         |         |   |          |         |         |                                                                                                                                                                                                                                                                                                                                                                                                                                                                                                                                                                                                                                                                                                                                                                                                                                                                                                                                                                                                                                                                                                                                                                                                                                                                                                                                                                                                                                                                                                                                                                                                                                                                                                                                                                                                                                                                                                                                                                                                                                                                                                                                                                                                                                                       |           |         |         |         |         |         |         |          |          |          |          |          |          |          |          |          |          |          |          |          |          |          |          |          |          |          |          |          |          |          |          |          |          |          |          |          |          |          |          |          |          |          |          |          |          |          |          |           |           |           |           |           |           |           |           |           |           |           |           |           |           |           |           |           |           |           |           |           |           |           |           |           |           |           |           |           |           |           |           |           |           |           |           |           |           |           |           |           |           |           |           |           |           |           |           |           |           |           |           |
| H                  | 0.83922                                                                                                                                                                                                                                                                                                                                                                                                                                                                                                                                                                                                                                                                                                                                                                                                                                                                                                                                                                                                                                                                                                                                                                                                                                                                                                                                                                                                                                                                                                                                                                                                                                                                                                                                                                                                                                                                                                                                                                                                                                                                                                                                                                                                                                                                                                                                                             | 1.40284                                                                            | 1.84884  |   |   |   |          |          |         |   |          |          |         |    |          |          |          |    |          |          |         |    |         |          |          |   |         |          |         |   |          |          |         |   |          |          |          |   |         |          |          |    |         |         |          |    |         |          |         |   |         |         |          |   |         |         |         |   |         |         |         |   |         |          |         |   |         |          |         |   |         |         |         |   |          |         |          |   |         |         |         |   |          |         |         |   |          |         |          |   |          |         |          |   |          |         |          |   |         |         |         |   |          |         |         |   |          |         |         |   |          |         |         |   |          |         |         |   |          |         |         |   |          |         |         |                                                                                                                                                                                                                                                                                                                                                                                                                                                                                                                                                                                                                                                                                                                                                                                                                                                                                                                                                                                                                                                                                                                                                                                                                                                                                                                                                                                                                                                                                                                                                                                                                                                                                                                                                                                                                                                                                                                                                                                                                                                                                                                                                                                                                                                       |           |         |         |         |         |         |         |          |          |          |          |          |          |          |          |          |          |          |          |          |          |          |          |          |          |          |          |          |          |          |          |          |          |          |          |          |          |          |          |          |          |          |          |          |          |          |          |           |           |           |           |           |           |           |           |           |           |           |           |           |           |           |           |           |           |           |           |           |           |           |           |           |           |           |           |           |           |           |           |           |           |           |           |           |           |           |           |           |           |           |           |           |           |           |           |           |           |           |           |
| C                  | -1.71481                                                                                                                                                                                                                                                                                                                                                                                                                                                                                                                                                                                                                                                                                                                                                                                                                                                                                                                                                                                                                                                                                                                                                                                                                                                                                                                                                                                                                                                                                                                                                                                                                                                                                                                                                                                                                                                                                                                                                                                                                                                                                                                                                                                                                                                                                                                                                            | 1.44675                                                                            | 1.90774  |   |   |   |          |          |         |   |          |          |         |    |          |          |          |    |          |          |         |    |         |          |          |   |         |          |         |   |          |          |         |   |          |          |          |   |         |          |          |    |         |         |          |    |         |          |         |   |         |         |          |   |         |         |         |   |         |         |         |   |         |          |         |   |         |          |         |   |         |         |         |   |          |         |          |   |         |         |         |   |          |         |         |   |          |         |          |   |          |         |          |   |          |         |          |   |         |         |         |   |          |         |         |   |          |         |         |   |          |         |         |   |          |         |         |   |          |         |         |   |          |         |         |                                                                                                                                                                                                                                                                                                                                                                                                                                                                                                                                                                                                                                                                                                                                                                                                                                                                                                                                                                                                                                                                                                                                                                                                                                                                                                                                                                                                                                                                                                                                                                                                                                                                                                                                                                                                                                                                                                                                                                                                                                                                                                                                                                                                                                                       |           |         |         |         |         |         |         |          |          |          |          |          |          |          |          |          |          |          |          |          |          |          |          |          |          |          |          |          |          |          |          |          |          |          |          |          |          |          |          |          |          |          |          |          |          |          |          |           |           |           |           |           |           |           |           |           |           |           |           |           |           |           |           |           |           |           |           |           |           |           |           |           |           |           |           |           |           |           |           |           |           |           |           |           |           |           |           |           |           |           |           |           |           |           |           |           |           |           |           |
| H                  | -2.22203                                                                                                                                                                                                                                                                                                                                                                                                                                                                                                                                                                                                                                                                                                                                                                                                                                                                                                                                                                                                                                                                                                                                                                                                                                                                                                                                                                                                                                                                                                                                                                                                                                                                                                                                                                                                                                                                                                                                                                                                                                                                                                                                                                                                                                                                                                                                                            | 0.58511                                                                            | 2.34218  |   |   |   |          |          |         |   |          |          |         |    |          |          |          |    |          |          |         |    |         |          |          |   |         |          |         |   |          |          |         |   |          |          |          |   |         |          |          |    |         |         |          |    |         |          |         |   |         |         |          |   |         |         |         |   |         |         |         |   |         |          |         |   |         |          |         |   |         |         |         |   |          |         |          |   |         |         |         |   |          |         |         |   |          |         |          |   |          |         |          |   |          |         |          |   |         |         |         |   |          |         |         |   |          |         |         |   |          |         |         |   |          |         |         |   |          |         |         |   |          |         |         |                                                                                                                                                                                                                                                                                                                                                                                                                                                                                                                                                                                                                                                                                                                                                                                                                                                                                                                                                                                                                                                                                                                                                                                                                                                                                                                                                                                                                                                                                                                                                                                                                                                                                                                                                                                                                                                                                                                                                                                                                                                                                                                                                                                                                                                       |           |         |         |         |         |         |         |          |          |          |          |          |          |          |          |          |          |          |          |          |          |          |          |          |          |          |          |          |          |          |          |          |          |          |          |          |          |          |          |          |          |          |          |          |          |          |          |           |           |           |           |           |           |           |           |           |           |           |           |           |           |           |           |           |           |           |           |           |           |           |           |           |           |           |           |           |           |           |           |           |           |           |           |           |           |           |           |           |           |           |           |           |           |           |           |           |           |           |           |
| C                  | -2.64151                                                                                                                                                                                                                                                                                                                                                                                                                                                                                                                                                                                                                                                                                                                                                                                                                                                                                                                                                                                                                                                                                                                                                                                                                                                                                                                                                                                                                                                                                                                                                                                                                                                                                                                                                                                                                                                                                                                                                                                                                                                                                                                                                                                                                                                                                                                                                            | 2.50820                                                                            | 1.30495  |   |   |   |          |          |         |   |          |          |         |    |          |          |          |    |          |          |         |    |         |          |          |   |         |          |         |   |          |          |         |   |          |          |          |   |         |          |          |    |         |         |          |    |         |          |         |   |         |         |          |   |         |         |         |   |         |         |         |   |         |          |         |   |         |          |         |   |         |         |         |   |          |         |          |   |         |         |         |   |          |         |         |   |          |         |          |   |          |         |          |   |          |         |          |   |         |         |         |   |          |         |         |   |          |         |         |   |          |         |         |   |          |         |         |   |          |         |         |   |          |         |         |                                                                                                                                                                                                                                                                                                                                                                                                                                                                                                                                                                                                                                                                                                                                                                                                                                                                                                                                                                                                                                                                                                                                                                                                                                                                                                                                                                                                                                                                                                                                                                                                                                                                                                                                                                                                                                                                                                                                                                                                                                                                                                                                                                                                                                                       |           |         |         |         |         |         |         |          |          |          |          |          |          |          |          |          |          |          |          |          |          |          |          |          |          |          |          |          |          |          |          |          |          |          |          |          |          |          |          |          |          |          |          |          |          |          |          |           |           |           |           |           |           |           |           |           |           |           |           |           |           |           |           |           |           |           |           |           |           |           |           |           |           |           |           |           |           |           |           |           |           |           |           |           |           |           |           |           |           |           |           |           |           |           |           |           |           |           |           |
| H                  | -3.48117                                                                                                                                                                                                                                                                                                                                                                                                                                                                                                                                                                                                                                                                                                                                                                                                                                                                                                                                                                                                                                                                                                                                                                                                                                                                                                                                                                                                                                                                                                                                                                                                                                                                                                                                                                                                                                                                                                                                                                                                                                                                                                                                                                                                                                                                                                                                                            | 2.02235                                                                            | 0.80054  |   |   |   |          |          |         |   |          |          |         |    |          |          |          |    |          |          |         |    |         |          |          |   |         |          |         |   |          |          |         |   |          |          |          |   |         |          |          |    |         |         |          |    |         |          |         |   |         |         |          |   |         |         |         |   |         |         |         |   |         |          |         |   |         |          |         |   |         |         |         |   |          |         |          |   |         |         |         |   |          |         |         |   |          |         |          |   |          |         |          |   |          |         |          |   |         |         |         |   |          |         |         |   |          |         |         |   |          |         |         |   |          |         |         |   |          |         |         |   |          |         |         |                                                                                                                                                                                                                                                                                                                                                                                                                                                                                                                                                                                                                                                                                                                                                                                                                                                                                                                                                                                                                                                                                                                                                                                                                                                                                                                                                                                                                                                                                                                                                                                                                                                                                                                                                                                                                                                                                                                                                                                                                                                                                                                                                                                                                                                       |           |         |         |         |         |         |         |          |          |          |          |          |          |          |          |          |          |          |          |          |          |          |          |          |          |          |          |          |          |          |          |          |          |          |          |          |          |          |          |          |          |          |          |          |          |          |          |           |           |           |           |           |           |           |           |           |           |           |           |           |           |           |           |           |           |           |           |           |           |           |           |           |           |           |           |           |           |           |           |           |           |           |           |           |           |           |           |           |           |           |           |           |           |           |           |           |           |           |           |
| H                  | -3.05166                                                                                                                                                                                                                                                                                                                                                                                                                                                                                                                                                                                                                                                                                                                                                                                                                                                                                                                                                                                                                                                                                                                                                                                                                                                                                                                                                                                                                                                                                                                                                                                                                                                                                                                                                                                                                                                                                                                                                                                                                                                                                                                                                                                                                                                                                                                                                            | 3.17345                                                                            | 2.06737  |   |   |   |          |          |         |   |          |          |         |    |          |          |          |    |          |          |         |    |         |          |          |   |         |          |         |   |          |          |         |   |          |          |          |   |         |          |          |    |         |         |          |    |         |          |         |   |         |         |          |   |         |         |         |   |         |         |         |   |         |          |         |   |         |          |         |   |         |         |         |   |          |         |          |   |         |         |         |   |          |         |         |   |          |         |          |   |          |         |          |   |          |         |          |   |         |         |         |   |          |         |         |   |          |         |         |   |          |         |         |   |          |         |         |   |          |         |         |   |          |         |         |                                                                                                                                                                                                                                                                                                                                                                                                                                                                                                                                                                                                                                                                                                                                                                                                                                                                                                                                                                                                                                                                                                                                                                                                                                                                                                                                                                                                                                                                                                                                                                                                                                                                                                                                                                                                                                                                                                                                                                                                                                                                                                                                                                                                                                                       |           |         |         |         |         |         |         |          |          |          |          |          |          |          |          |          |          |          |          |          |          |          |          |          |          |          |          |          |          |          |          |          |          |          |          |          |          |          |          |          |          |          |          |          |          |          |          |           |           |           |           |           |           |           |           |           |           |           |           |           |           |           |           |           |           |           |           |           |           |           |           |           |           |           |           |           |           |           |           |           |           |           |           |           |           |           |           |           |           |           |           |           |           |           |           |           |           |           |           |
| C                  | -1.74191                                                                                                                                                                                                                                                                                                                                                                                                                                                                                                                                                                                                                                                                                                                                                                                                                                                                                                                                                                                                                                                                                                                                                                                                                                                                                                                                                                                                                                                                                                                                                                                                                                                                                                                                                                                                                                                                                                                                                                                                                                                                                                                                                                                                                                                                                                                                                            | 3.24151                                                                            | 0.29497  |   |   |   |          |          |         |   |          |          |         |    |          |          |          |    |          |          |         |    |         |          |          |   |         |          |         |   |          |          |         |   |          |          |          |   |         |          |          |    |         |         |          |    |         |          |         |   |         |         |          |   |         |         |         |   |         |         |         |   |         |          |         |   |         |          |         |   |         |         |         |   |          |         |          |   |         |         |         |   |          |         |         |   |          |         |          |   |          |         |          |   |          |         |          |   |         |         |         |   |          |         |         |   |          |         |         |   |          |         |         |   |          |         |         |   |          |         |         |   |          |         |         |                                                                                                                                                                                                                                                                                                                                                                                                                                                                                                                                                                                                                                                                                                                                                                                                                                                                                                                                                                                                                                                                                                                                                                                                                                                                                                                                                                                                                                                                                                                                                                                                                                                                                                                                                                                                                                                                                                                                                                                                                                                                                                                                                                                                                                                       |           |         |         |         |         |         |         |          |          |          |          |          |          |          |          |          |          |          |          |          |          |          |          |          |          |          |          |          |          |          |          |          |          |          |          |          |          |          |          |          |          |          |          |          |          |          |          |           |           |           |           |           |           |           |           |           |           |           |           |           |           |           |           |           |           |           |           |           |           |           |           |           |           |           |           |           |           |           |           |           |           |           |           |           |           |           |           |           |           |           |           |           |           |           |           |           |           |           |           |
| -403.7269          | 39.4494                                                                                                                                                                                                                                                                                                                                                                                                                                                                                                                                                                                                                                                                                                                                                                                                                                                                                                                                                                                                                                                                                                                                                                                                                                                                                                                                                                                                                                                                                                                                                                                                                                                                                                                                                                                                                                                                                                                                                                                                                                                                                                                                                                                                                                                                                                                                                             | 43.4190                                                                            |          |   |   |   |          |          |         |   |          |          |         |    |          |          |          |    |          |          |         |    |         |          |          |   |         |          |         |   |          |          |         |   |          |          |          |   |         |          |          |    |         |         |          |    |         |          |         |   |         |         |          |   |         |         |         |   |         |         |         |   |         |          |         |   |         |          |         |   |         |         |         |   |          |         |          |   |         |         |         |   |          |         |         |   |          |         |          |   |          |         |          |   |          |         |          |   |         |         |         |   |          |         |         |   |          |         |         |   |          |         |         |   |          |         |         |   |          |         |         |   |          |         |         |                                                                                                                                                                                                                                                                                                                                                                                                                                                                                                                                                                                                                                                                                                                                                                                                                                                                                                                                                                                                                                                                                                                                                                                                                                                                                                                                                                                                                                                                                                                                                                                                                                                                                                                                                                                                                                                                                                                                                                                                                                                                                                                                                                                                                                                       |           |         |         |         |         |         |         |          |          |          |          |          |          |          |          |          |          |          |          |          |          |          |          |          |          |          |          |          |          |          |          |          |          |          |          |          |          |          |          |          |          |          |          |          |          |          |          |           |           |           |           |           |           |           |           |           |           |           |           |           |           |           |           |           |           |           |           |           |           |           |           |           |           |           |           |           |           |           |           |           |           |           |           |           |           |           |           |           |           |           |           |           |           |           |           |           |           |           |           |
| 58.5135            | 75.4914                                                                                                                                                                                                                                                                                                                                                                                                                                                                                                                                                                                                                                                                                                                                                                                                                                                                                                                                                                                                                                                                                                                                                                                                                                                                                                                                                                                                                                                                                                                                                                                                                                                                                                                                                                                                                                                                                                                                                                                                                                                                                                                                                                                                                                                                                                                                                             | 82.1553                                                                            |          |   |   |   |          |          |         |   |          |          |         |    |          |          |          |    |          |          |         |    |         |          |          |   |         |          |         |   |          |          |         |   |          |          |          |   |         |          |          |    |         |         |          |    |         |          |         |   |         |         |          |   |         |         |         |   |         |         |         |   |         |          |         |   |         |          |         |   |         |         |         |   |          |         |          |   |         |         |         |   |          |         |         |   |          |         |          |   |          |         |          |   |          |         |          |   |         |         |         |   |          |         |         |   |          |         |         |   |          |         |         |   |          |         |         |   |          |         |         |   |          |         |         |                                                                                                                                                                                                                                                                                                                                                                                                                                                                                                                                                                                                                                                                                                                                                                                                                                                                                                                                                                                                                                                                                                                                                                                                                                                                                                                                                                                                                                                                                                                                                                                                                                                                                                                                                                                                                                                                                                                                                                                                                                                                                                                                                                                                                                                       |           |         |         |         |         |         |         |          |          |          |          |          |          |          |          |          |          |          |          |          |          |          |          |          |          |          |          |          |          |          |          |          |          |          |          |          |          |          |          |          |          |          |          |          |          |          |          |           |           |           |           |           |           |           |           |           |           |           |           |           |           |           |           |           |           |           |           |           |           |           |           |           |           |           |           |           |           |           |           |           |           |           |           |           |           |           |           |           |           |           |           |           |           |           |           |           |           |           |           |
| 91.2215            | 101.2886                                                                                                                                                                                                                                                                                                                                                                                                                                                                                                                                                                                                                                                                                                                                                                                                                                                                                                                                                                                                                                                                                                                                                                                                                                                                                                                                                                                                                                                                                                                                                                                                                                                                                                                                                                                                                                                                                                                                                                                                                                                                                                                                                                                                                                                                                                                                                            | 117.1379                                                                           |          |   |   |   |          |          |         |   |          |          |         |    |          |          |          |    |          |          |         |    |         |          |          |   |         |          |         |   |          |          |         |   |          |          |          |   |         |          |          |    |         |         |          |    |         |          |         |   |         |         |          |   |         |         |         |   |         |         |         |   |         |          |         |   |         |          |         |   |         |         |         |   |          |         |          |   |         |         |         |   |          |         |         |   |          |         |          |   |          |         |          |   |          |         |          |   |         |         |         |   |          |         |         |   |          |         |         |   |          |         |         |   |          |         |         |   |          |         |         |   |          |         |         |                                                                                                                                                                                                                                                                                                                                                                                                                                                                                                                                                                                                                                                                                                                                                                                                                                                                                                                                                                                                                                                                                                                                                                                                                                                                                                                                                                                                                                                                                                                                                                                                                                                                                                                                                                                                                                                                                                                                                                                                                                                                                                                                                                                                                                                       |           |         |         |         |         |         |         |          |          |          |          |          |          |          |          |          |          |          |          |          |          |          |          |          |          |          |          |          |          |          |          |          |          |          |          |          |          |          |          |          |          |          |          |          |          |          |          |           |           |           |           |           |           |           |           |           |           |           |           |           |           |           |           |           |           |           |           |           |           |           |           |           |           |           |           |           |           |           |           |           |           |           |           |           |           |           |           |           |           |           |           |           |           |           |           |           |           |           |           |
| 129.7231           | 137.8439                                                                                                                                                                                                                                                                                                                                                                                                                                                                                                                                                                                                                                                                                                                                                                                                                                                                                                                                                                                                                                                                                                                                                                                                                                                                                                                                                                                                                                                                                                                                                                                                                                                                                                                                                                                                                                                                                                                                                                                                                                                                                                                                                                                                                                                                                                                                                            | 150.6632                                                                           |          |   |   |   |          |          |         |   |          |          |         |    |          |          |          |    |          |          |         |    |         |          |          |   |         |          |         |   |          |          |         |   |          |          |          |   |         |          |          |    |         |         |          |    |         |          |         |   |         |         |          |   |         |         |         |   |         |         |         |   |         |          |         |   |         |          |         |   |         |         |         |   |          |         |          |   |         |         |         |   |          |         |         |   |          |         |          |   |          |         |          |   |          |         |          |   |         |         |         |   |          |         |         |   |          |         |         |   |          |         |         |   |          |         |         |   |          |         |         |   |          |         |         |                                                                                                                                                                                                                                                                                                                                                                                                                                                                                                                                                                                                                                                                                                                                                                                                                                                                                                                                                                                                                                                                                                                                                                                                                                                                                                                                                                                                                                                                                                                                                                                                                                                                                                                                                                                                                                                                                                                                                                                                                                                                                                                                                                                                                                                       |           |         |         |         |         |         |         |          |          |          |          |          |          |          |          |          |          |          |          |          |          |          |          |          |          |          |          |          |          |          |          |          |          |          |          |          |          |          |          |          |          |          |          |          |          |          |          |           |           |           |           |           |           |           |           |           |           |           |           |           |           |           |           |           |           |           |           |           |           |           |           |           |           |           |           |           |           |           |           |           |           |           |           |           |           |           |           |           |           |           |           |           |           |           |           |           |           |           |           |
| 165.7095           | 171.0236                                                                                                                                                                                                                                                                                                                                                                                                                                                                                                                                                                                                                                                                                                                                                                                                                                                                                                                                                                                                                                                                                                                                                                                                                                                                                                                                                                                                                                                                                                                                                                                                                                                                                                                                                                                                                                                                                                                                                                                                                                                                                                                                                                                                                                                                                                                                                            | 177.9096                                                                           |          |   |   |   |          |          |         |   |          |          |         |    |          |          |          |    |          |          |         |    |         |          |          |   |         |          |         |   |          |          |         |   |          |          |          |   |         |          |          |    |         |         |          |    |         |          |         |   |         |         |          |   |         |         |         |   |         |         |         |   |         |          |         |   |         |          |         |   |         |         |         |   |          |         |          |   |         |         |         |   |          |         |         |   |          |         |          |   |          |         |          |   |          |         |          |   |         |         |         |   |          |         |         |   |          |         |         |   |          |         |         |   |          |         |         |   |          |         |         |   |          |         |         |                                                                                                                                                                                                                                                                                                                                                                                                                                                                                                                                                                                                                                                                                                                                                                                                                                                                                                                                                                                                                                                                                                                                                                                                                                                                                                                                                                                                                                                                                                                                                                                                                                                                                                                                                                                                                                                                                                                                                                                                                                                                                                                                                                                                                                                       |           |         |         |         |         |         |         |          |          |          |          |          |          |          |          |          |          |          |          |          |          |          |          |          |          |          |          |          |          |          |          |          |          |          |          |          |          |          |          |          |          |          |          |          |          |          |          |           |           |           |           |           |           |           |           |           |           |           |           |           |           |           |           |           |           |           |           |           |           |           |           |           |           |           |           |           |           |           |           |           |           |           |           |           |           |           |           |           |           |           |           |           |           |           |           |           |           |           |           |
| 183.1308           | 190.9979                                                                                                                                                                                                                                                                                                                                                                                                                                                                                                                                                                                                                                                                                                                                                                                                                                                                                                                                                                                                                                                                                                                                                                                                                                                                                                                                                                                                                                                                                                                                                                                                                                                                                                                                                                                                                                                                                                                                                                                                                                                                                                                                                                                                                                                                                                                                                            | 198.8810                                                                           |          |   |   |   |          |          |         |   |          |          |         |    |          |          |          |    |          |          |         |    |         |          |          |   |         |          |         |   |          |          |         |   |          |          |          |   |         |          |          |    |         |         |          |    |         |          |         |   |         |         |          |   |         |         |         |   |         |         |         |   |         |          |         |   |         |          |         |   |         |         |         |   |          |         |          |   |         |         |         |   |          |         |         |   |          |         |          |   |          |         |          |   |          |         |          |   |         |         |         |   |          |         |         |   |          |         |         |   |          |         |         |   |          |         |         |   |          |         |         |   |          |         |         |                                                                                                                                                                                                                                                                                                                                                                                                                                                                                                                                                                                                                                                                                                                                                                                                                                                                                                                                                                                                                                                                                                                                                                                                                                                                                                                                                                                                                                                                                                                                                                                                                                                                                                                                                                                                                                                                                                                                                                                                                                                                                                                                                                                                                                                       |           |         |         |         |         |         |         |          |          |          |          |          |          |          |          |          |          |          |          |          |          |          |          |          |          |          |          |          |          |          |          |          |          |          |          |          |          |          |          |          |          |          |          |          |          |          |          |           |           |           |           |           |           |           |           |           |           |           |           |           |           |           |           |           |           |           |           |           |           |           |           |           |           |           |           |           |           |           |           |           |           |           |           |           |           |           |           |           |           |           |           |           |           |           |           |           |           |           |           |
| 216.4432           | 228.9438                                                                                                                                                                                                                                                                                                                                                                                                                                                                                                                                                                                                                                                                                                                                                                                                                                                                                                                                                                                                                                                                                                                                                                                                                                                                                                                                                                                                                                                                                                                                                                                                                                                                                                                                                                                                                                                                                                                                                                                                                                                                                                                                                                                                                                                                                                                                                            | 238.2625                                                                           |          |   |   |   |          |          |         |   |          |          |         |    |          |          |          |    |          |          |         |    |         |          |          |   |         |          |         |   |          |          |         |   |          |          |          |   |         |          |          |    |         |         |          |    |         |          |         |   |         |         |          |   |         |         |         |   |         |         |         |   |         |          |         |   |         |          |         |   |         |         |         |   |          |         |          |   |         |         |         |   |          |         |         |   |          |         |          |   |          |         |          |   |          |         |          |   |         |         |         |   |          |         |         |   |          |         |         |   |          |         |         |   |          |         |         |   |          |         |         |   |          |         |         |                                                                                                                                                                                                                                                                                                                                                                                                                                                                                                                                                                                                                                                                                                                                                                                                                                                                                                                                                                                                                                                                                                                                                                                                                                                                                                                                                                                                                                                                                                                                                                                                                                                                                                                                                                                                                                                                                                                                                                                                                                                                                                                                                                                                                                                       |           |         |         |         |         |         |         |          |          |          |          |          |          |          |          |          |          |          |          |          |          |          |          |          |          |          |          |          |          |          |          |          |          |          |          |          |          |          |          |          |          |          |          |          |          |          |          |           |           |           |           |           |           |           |           |           |           |           |           |           |           |           |           |           |           |           |           |           |           |           |           |           |           |           |           |           |           |           |           |           |           |           |           |           |           |           |           |           |           |           |           |           |           |           |           |           |           |           |           |
| 249.0338           | 274.7708                                                                                                                                                                                                                                                                                                                                                                                                                                                                                                                                                                                                                                                                                                                                                                                                                                                                                                                                                                                                                                                                                                                                                                                                                                                                                                                                                                                                                                                                                                                                                                                                                                                                                                                                                                                                                                                                                                                                                                                                                                                                                                                                                                                                                                                                                                                                                            | 286.4805                                                                           |          |   |   |   |          |          |         |   |          |          |         |    |          |          |          |    |          |          |         |    |         |          |          |   |         |          |         |   |          |          |         |   |          |          |          |   |         |          |          |    |         |         |          |    |         |          |         |   |         |         |          |   |         |         |         |   |         |         |         |   |         |          |         |   |         |          |         |   |         |         |         |   |          |         |          |   |         |         |         |   |          |         |         |   |          |         |          |   |          |         |          |   |          |         |          |   |         |         |         |   |          |         |         |   |          |         |         |   |          |         |         |   |          |         |         |   |          |         |         |   |          |         |         |                                                                                                                                                                                                                                                                                                                                                                                                                                                                                                                                                                                                                                                                                                                                                                                                                                                                                                                                                                                                                                                                                                                                                                                                                                                                                                                                                                                                                                                                                                                                                                                                                                                                                                                                                                                                                                                                                                                                                                                                                                                                                                                                                                                                                                                       |           |         |         |         |         |         |         |          |          |          |          |          |          |          |          |          |          |          |          |          |          |          |          |          |          |          |          |          |          |          |          |          |          |          |          |          |          |          |          |          |          |          |          |          |          |          |          |           |           |           |           |           |           |           |           |           |           |           |           |           |           |           |           |           |           |           |           |           |           |           |           |           |           |           |           |           |           |           |           |           |           |           |           |           |           |           |           |           |           |           |           |           |           |           |           |           |           |           |           |
| 298.4855           | 304.0179                                                                                                                                                                                                                                                                                                                                                                                                                                                                                                                                                                                                                                                                                                                                                                                                                                                                                                                                                                                                                                                                                                                                                                                                                                                                                                                                                                                                                                                                                                                                                                                                                                                                                                                                                                                                                                                                                                                                                                                                                                                                                                                                                                                                                                                                                                                                                            | 311.7018                                                                           |          |   |   |   |          |          |         |   |          |          |         |    |          |          |          |    |          |          |         |    |         |          |          |   |         |          |         |   |          |          |         |   |          |          |          |   |         |          |          |    |         |         |          |    |         |          |         |   |         |         |          |   |         |         |         |   |         |         |         |   |         |          |         |   |         |          |         |   |         |         |         |   |          |         |          |   |         |         |         |   |          |         |         |   |          |         |          |   |          |         |          |   |          |         |          |   |         |         |         |   |          |         |         |   |          |         |         |   |          |         |         |   |          |         |         |   |          |         |         |   |          |         |         |                                                                                                                                                                                                                                                                                                                                                                                                                                                                                                                                                                                                                                                                                                                                                                                                                                                                                                                                                                                                                                                                                                                                                                                                                                                                                                                                                                                                                                                                                                                                                                                                                                                                                                                                                                                                                                                                                                                                                                                                                                                                                                                                                                                                                                                       |           |         |         |         |         |         |         |          |          |          |          |          |          |          |          |          |          |          |          |          |          |          |          |          |          |          |          |          |          |          |          |          |          |          |          |          |          |          |          |          |          |          |          |          |          |          |          |           |           |           |           |           |           |           |           |           |           |           |           |           |           |           |           |           |           |           |           |           |           |           |           |           |           |           |           |           |           |           |           |           |           |           |           |           |           |           |           |           |           |           |           |           |           |           |           |           |           |           |           |
| 315.4731           | 323.4610                                                                                                                                                                                                                                                                                                                                                                                                                                                                                                                                                                                                                                                                                                                                                                                                                                                                                                                                                                                                                                                                                                                                                                                                                                                                                                                                                                                                                                                                                                                                                                                                                                                                                                                                                                                                                                                                                                                                                                                                                                                                                                                                                                                                                                                                                                                                                            | 338.5417                                                                           |          |   |   |   |          |          |         |   |          |          |         |    |          |          |          |    |          |          |         |    |         |          |          |   |         |          |         |   |          |          |         |   |          |          |          |   |         |          |          |    |         |         |          |    |         |          |         |   |         |         |          |   |         |         |         |   |         |         |         |   |         |          |         |   |         |          |         |   |         |         |         |   |          |         |          |   |         |         |         |   |          |         |         |   |          |         |          |   |          |         |          |   |          |         |          |   |         |         |         |   |          |         |         |   |          |         |         |   |          |         |         |   |          |         |         |   |          |         |         |   |          |         |         |                                                                                                                                                                                                                                                                                                                                                                                                                                                                                                                                                                                                                                                                                                                                                                                                                                                                                                                                                                                                                                                                                                                                                                                                                                                                                                                                                                                                                                                                                                                                                                                                                                                                                                                                                                                                                                                                                                                                                                                                                                                                                                                                                                                                                                                       |           |         |         |         |         |         |         |          |          |          |          |          |          |          |          |          |          |          |          |          |          |          |          |          |          |          |          |          |          |          |          |          |          |          |          |          |          |          |          |          |          |          |          |          |          |          |          |           |           |           |           |           |           |           |           |           |           |           |           |           |           |           |           |           |           |           |           |           |           |           |           |           |           |           |           |           |           |           |           |           |           |           |           |           |           |           |           |           |           |           |           |           |           |           |           |           |           |           |           |
| 372.1419           | 376.3348                                                                                                                                                                                                                                                                                                                                                                                                                                                                                                                                                                                                                                                                                                                                                                                                                                                                                                                                                                                                                                                                                                                                                                                                                                                                                                                                                                                                                                                                                                                                                                                                                                                                                                                                                                                                                                                                                                                                                                                                                                                                                                                                                                                                                                                                                                                                                            | 437.0285                                                                           |          |   |   |   |          |          |         |   |          |          |         |    |          |          |          |    |          |          |         |    |         |          |          |   |         |          |         |   |          |          |         |   |          |          |          |   |         |          |          |    |         |         |          |    |         |          |         |   |         |         |          |   |         |         |         |   |         |         |         |   |         |          |         |   |         |          |         |   |         |         |         |   |          |         |          |   |         |         |         |   |          |         |         |   |          |         |          |   |          |         |          |   |          |         |          |   |         |         |         |   |          |         |         |   |          |         |         |   |          |         |         |   |          |         |         |   |          |         |         |   |          |         |         |                                                                                                                                                                                                                                                                                                                                                                                                                                                                                                                                                                                                                                                                                                                                                                                                                                                                                                                                                                                                                                                                                                                                                                                                                                                                                                                                                                                                                                                                                                                                                                                                                                                                                                                                                                                                                                                                                                                                                                                                                                                                                                                                                                                                                                                       |           |         |         |         |         |         |         |          |          |          |          |          |          |          |          |          |          |          |          |          |          |          |          |          |          |          |          |          |          |          |          |          |          |          |          |          |          |          |          |          |          |          |          |          |          |          |          |           |           |           |           |           |           |           |           |           |           |           |           |           |           |           |           |           |           |           |           |           |           |           |           |           |           |           |           |           |           |           |           |           |           |           |           |           |           |           |           |           |           |           |           |           |           |           |           |           |           |           |           |
| 441.2549           | 464.7824                                                                                                                                                                                                                                                                                                                                                                                                                                                                                                                                                                                                                                                                                                                                                                                                                                                                                                                                                                                                                                                                                                                                                                                                                                                                                                                                                                                                                                                                                                                                                                                                                                                                                                                                                                                                                                                                                                                                                                                                                                                                                                                                                                                                                                                                                                                                                            | 551.8564                                                                           |          |   |   |   |          |          |         |   |          |          |         |    |          |          |          |    |          |          |         |    |         |          |          |   |         |          |         |   |          |          |         |   |          |          |          |   |         |          |          |    |         |         |          |    |         |          |         |   |         |         |          |   |         |         |         |   |         |         |         |   |         |          |         |   |         |          |         |   |         |         |         |   |          |         |          |   |         |         |         |   |          |         |         |   |          |         |          |   |          |         |          |   |          |         |          |   |         |         |         |   |          |         |         |   |          |         |         |   |          |         |         |   |          |         |         |   |          |         |         |   |          |         |         |                                                                                                                                                                                                                                                                                                                                                                                                                                                                                                                                                                                                                                                                                                                                                                                                                                                                                                                                                                                                                                                                                                                                                                                                                                                                                                                                                                                                                                                                                                                                                                                                                                                                                                                                                                                                                                                                                                                                                                                                                                                                                                                                                                                                                                                       |           |         |         |         |         |         |         |          |          |          |          |          |          |          |          |          |          |          |          |          |          |          |          |          |          |          |          |          |          |          |          |          |          |          |          |          |          |          |          |          |          |          |          |          |          |          |          |           |           |           |           |           |           |           |           |           |           |           |           |           |           |           |           |           |           |           |           |           |           |           |           |           |           |           |           |           |           |           |           |           |           |           |           |           |           |           |           |           |           |           |           |           |           |           |           |           |           |           |           |
| 577.3141           | 633.9556                                                                                                                                                                                                                                                                                                                                                                                                                                                                                                                                                                                                                                                                                                                                                                                                                                                                                                                                                                                                                                                                                                                                                                                                                                                                                                                                                                                                                                                                                                                                                                                                                                                                                                                                                                                                                                                                                                                                                                                                                                                                                                                                                                                                                                                                                                                                                            | 657.6382                                                                           |          |   |   |   |          |          |         |   |          |          |         |    |          |          |          |    |          |          |         |    |         |          |          |   |         |          |         |   |          |          |         |   |          |          |          |   |         |          |          |    |         |         |          |    |         |          |         |   |         |         |          |   |         |         |         |   |         |         |         |   |         |          |         |   |         |          |         |   |         |         |         |   |          |         |          |   |         |         |         |   |          |         |         |   |          |         |          |   |          |         |          |   |          |         |          |   |         |         |         |   |          |         |         |   |          |         |         |   |          |         |         |   |          |         |         |   |          |         |         |   |          |         |         |                                                                                                                                                                                                                                                                                                                                                                                                                                                                                                                                                                                                                                                                                                                                                                                                                                                                                                                                                                                                                                                                                                                                                                                                                                                                                                                                                                                                                                                                                                                                                                                                                                                                                                                                                                                                                                                                                                                                                                                                                                                                                                                                                                                                                                                       |           |         |         |         |         |         |         |          |          |          |          |          |          |          |          |          |          |          |          |          |          |          |          |          |          |          |          |          |          |          |          |          |          |          |          |          |          |          |          |          |          |          |          |          |          |          |          |           |           |           |           |           |           |           |           |           |           |           |           |           |           |           |           |           |           |           |           |           |           |           |           |           |           |           |           |           |           |           |           |           |           |           |           |           |           |           |           |           |           |           |           |           |           |           |           |           |           |           |           |
| 811.5085           | 838.4658                                                                                                                                                                                                                                                                                                                                                                                                                                                                                                                                                                                                                                                                                                                                                                                                                                                                                                                                                                                                                                                                                                                                                                                                                                                                                                                                                                                                                                                                                                                                                                                                                                                                                                                                                                                                                                                                                                                                                                                                                                                                                                                                                                                                                                                                                                                                                            | 842.4375                                                                           |          |   |   |   |          |          |         |   |          |          |         |    |          |          |          |    |          |          |         |    |         |          |          |   |         |          |         |   |          |          |         |   |          |          |          |   |         |          |          |    |         |         |          |    |         |          |         |   |         |         |          |   |         |         |         |   |         |         |         |   |         |          |         |   |         |          |         |   |         |         |         |   |          |         |          |   |         |         |         |   |          |         |         |   |          |         |          |   |          |         |          |   |          |         |          |   |         |         |         |   |          |         |         |   |          |         |         |   |          |         |         |   |          |         |         |   |          |         |         |   |          |         |         |                                                                                                                                                                                                                                                                                                                                                                                                                                                                                                                                                                                                                                                                                                                                                                                                                                                                                                                                                                                                                                                                                                                                                                                                                                                                                                                                                                                                                                                                                                                                                                                                                                                                                                                                                                                                                                                                                                                                                                                                                                                                                                                                                                                                                                                       |           |         |         |         |         |         |         |          |          |          |          |          |          |          |          |          |          |          |          |          |          |          |          |          |          |          |          |          |          |          |          |          |          |          |          |          |          |          |          |          |          |          |          |          |          |          |          |           |           |           |           |           |           |           |           |           |           |           |           |           |           |           |           |           |           |           |           |           |           |           |           |           |           |           |           |           |           |           |           |           |           |           |           |           |           |           |           |           |           |           |           |           |           |           |           |           |           |           |           |
| 844.5586           | 855.0881                                                                                                                                                                                                                                                                                                                                                                                                                                                                                                                                                                                                                                                                                                                                                                                                                                                                                                                                                                                                                                                                                                                                                                                                                                                                                                                                                                                                                                                                                                                                                                                                                                                                                                                                                                                                                                                                                                                                                                                                                                                                                                                                                                                                                                                                                                                                                            | 880.8583                                                                           |          |   |   |   |          |          |         |   |          |          |         |    |          |          |          |    |          |          |         |    |         |          |          |   |         |          |         |   |          |          |         |   |          |          |          |   |         |          |          |    |         |         |          |    |         |          |         |   |         |         |          |   |         |         |         |   |         |         |         |   |         |          |         |   |         |          |         |   |         |         |         |   |          |         |          |   |         |         |         |   |          |         |         |   |          |         |          |   |          |         |          |   |          |         |          |   |         |         |         |   |          |         |         |   |          |         |         |   |          |         |         |   |          |         |         |   |          |         |         |   |          |         |         |                                                                                                                                                                                                                                                                                                                                                                                                                                                                                                                                                                                                                                                                                                                                                                                                                                                                                                                                                                                                                                                                                                                                                                                                                                                                                                                                                                                                                                                                                                                                                                                                                                                                                                                                                                                                                                                                                                                                                                                                                                                                                                                                                                                                                                                       |           |         |         |         |         |         |         |          |          |          |          |          |          |          |          |          |          |          |          |          |          |          |          |          |          |          |          |          |          |          |          |          |          |          |          |          |          |          |          |          |          |          |          |          |          |          |          |           |           |           |           |           |           |           |           |           |           |           |           |           |           |           |           |           |           |           |           |           |           |           |           |           |           |           |           |           |           |           |           |           |           |           |           |           |           |           |           |           |           |           |           |           |           |           |           |           |           |           |           |
| 923.1106           | 953.4014                                                                                                                                                                                                                                                                                                                                                                                                                                                                                                                                                                                                                                                                                                                                                                                                                                                                                                                                                                                                                                                                                                                                                                                                                                                                                                                                                                                                                                                                                                                                                                                                                                                                                                                                                                                                                                                                                                                                                                                                                                                                                                                                                                                                                                                                                                                                                            | 1005.2436                                                                          |          |   |   |   |          |          |         |   |          |          |         |    |          |          |          |    |          |          |         |    |         |          |          |   |         |          |         |   |          |          |         |   |          |          |          |   |         |          |          |    |         |         |          |    |         |          |         |   |         |         |          |   |         |         |         |   |         |         |         |   |         |          |         |   |         |          |         |   |         |         |         |   |          |         |          |   |         |         |         |   |          |         |         |   |          |         |          |   |          |         |          |   |          |         |          |   |         |         |         |   |          |         |         |   |          |         |         |   |          |         |         |   |          |         |         |   |          |         |         |   |          |         |         |                                                                                                                                                                                                                                                                                                                                                                                                                                                                                                                                                                                                                                                                                                                                                                                                                                                                                                                                                                                                                                                                                                                                                                                                                                                                                                                                                                                                                                                                                                                                                                                                                                                                                                                                                                                                                                                                                                                                                                                                                                                                                                                                                                                                                                                       |           |         |         |         |         |         |         |          |          |          |          |          |          |          |          |          |          |          |          |          |          |          |          |          |          |          |          |          |          |          |          |          |          |          |          |          |          |          |          |          |          |          |          |          |          |          |          |           |           |           |           |           |           |           |           |           |           |           |           |           |           |           |           |           |           |           |           |           |           |           |           |           |           |           |           |           |           |           |           |           |           |           |           |           |           |           |           |           |           |           |           |           |           |           |           |           |           |           |           |
| 1036.2672          | 1038.0285                                                                                                                                                                                                                                                                                                                                                                                                                                                                                                                                                                                                                                                                                                                                                                                                                                                                                                                                                                                                                                                                                                                                                                                                                                                                                                                                                                                                                                                                                                                                                                                                                                                                                                                                                                                                                                                                                                                                                                                                                                                                                                                                                                                                                                                                                                                                                           | 1042.0726                                                                          |          |   |   |   |          |          |         |   |          |          |         |    |          |          |          |    |          |          |         |    |         |          |          |   |         |          |         |   |          |          |         |   |          |          |          |   |         |          |          |    |         |         |          |    |         |          |         |   |         |         |          |   |         |         |         |   |         |         |         |   |         |          |         |   |         |          |         |   |         |         |         |   |          |         |          |   |         |         |         |   |          |         |         |   |          |         |          |   |          |         |          |   |          |         |          |   |         |         |         |   |          |         |         |   |          |         |         |   |          |         |         |   |          |         |         |   |          |         |         |   |          |         |         |                                                                                                                                                                                                                                                                                                                                                                                                                                                                                                                                                                                                                                                                                                                                                                                                                                                                                                                                                                                                                                                                                                                                                                                                                                                                                                                                                                                                                                                                                                                                                                                                                                                                                                                                                                                                                                                                                                                                                                                                                                                                                                                                                                                                                                                       |           |         |         |         |         |         |         |          |          |          |          |          |          |          |          |          |          |          |          |          |          |          |          |          |          |          |          |          |          |          |          |          |          |          |          |          |          |          |          |          |          |          |          |          |          |          |          |           |           |           |           |           |           |           |           |           |           |           |           |           |           |           |           |           |           |           |           |           |           |           |           |           |           |           |           |           |           |           |           |           |           |           |           |           |           |           |           |           |           |           |           |           |           |           |           |           |           |           |           |
| 1049.7687          | 1055.4589                                                                                                                                                                                                                                                                                                                                                                                                                                                                                                                                                                                                                                                                                                                                                                                                                                                                                                                                                                                                                                                                                                                                                                                                                                                                                                                                                                                                                                                                                                                                                                                                                                                                                                                                                                                                                                                                                                                                                                                                                                                                                                                                                                                                                                                                                                                                                           | 1059.8028                                                                          |          |   |   |   |          |          |         |   |          |          |         |    |          |          |          |    |          |          |         |    |         |          |          |   |         |          |         |   |          |          |         |   |          |          |          |   |         |          |          |    |         |         |          |    |         |          |         |   |         |         |          |   |         |         |         |   |         |         |         |   |         |          |         |   |         |          |         |   |         |         |         |   |          |         |          |   |         |         |         |   |          |         |         |   |          |         |          |   |          |         |          |   |          |         |          |   |         |         |         |   |          |         |         |   |          |         |         |   |          |         |         |   |          |         |         |   |          |         |         |   |          |         |         |                                                                                                                                                                                                                                                                                                                                                                                                                                                                                                                                                                                                                                                                                                                                                                                                                                                                                                                                                                                                                                                                                                                                                                                                                                                                                                                                                                                                                                                                                                                                                                                                                                                                                                                                                                                                                                                                                                                                                                                                                                                                                                                                                                                                                                                       |           |         |         |         |         |         |         |          |          |          |          |          |          |          |          |          |          |          |          |          |          |          |          |          |          |          |          |          |          |          |          |          |          |          |          |          |          |          |          |          |          |          |          |          |          |          |          |           |           |           |           |           |           |           |           |           |           |           |           |           |           |           |           |           |           |           |           |           |           |           |           |           |           |           |           |           |           |           |           |           |           |           |           |           |           |           |           |           |           |           |           |           |           |           |           |           |           |           |           |
| 1066.8548          | 1088.4185                                                                                                                                                                                                                                                                                                                                                                                                                                                                                                                                                                                                                                                                                                                                                                                                                                                                                                                                                                                                                                                                                                                                                                                                                                                                                                                                                                                                                                                                                                                                                                                                                                                                                                                                                                                                                                                                                                                                                                                                                                                                                                                                                                                                                                                                                                                                                           | 1095.6901                                                                          |          |   |   |   |          |          |         |   |          |          |         |    |          |          |          |    |          |          |         |    |         |          |          |   |         |          |         |   |          |          |         |   |          |          |          |   |         |          |          |    |         |         |          |    |         |          |         |   |         |         |          |   |         |         |         |   |         |         |         |   |         |          |         |   |         |          |         |   |         |         |         |   |          |         |          |   |         |         |         |   |          |         |         |   |          |         |          |   |          |         |          |   |          |         |          |   |         |         |         |   |          |         |         |   |          |         |         |   |          |         |         |   |          |         |         |   |          |         |         |   |          |         |         |                                                                                                                                                                                                                                                                                                                                                                                                                                                                                                                                                                                                                                                                                                                                                                                                                                                                                                                                                                                                                                                                                                                                                                                                                                                                                                                                                                                                                                                                                                                                                                                                                                                                                                                                                                                                                                                                                                                                                                                                                                                                                                                                                                                                                                                       |           |         |         |         |         |         |         |          |          |          |          |          |          |          |          |          |          |          |          |          |          |          |          |          |          |          |          |          |          |          |          |          |          |          |          |          |          |          |          |          |          |          |          |          |          |          |          |           |           |           |           |           |           |           |           |           |           |           |           |           |           |           |           |           |           |           |           |           |           |           |           |           |           |           |           |           |           |           |           |           |           |           |           |           |           |           |           |           |           |           |           |           |           |           |           |           |           |           |           |
| 1142.0120          | 1149.6672                                                                                                                                                                                                                                                                                                                                                                                                                                                                                                                                                                                                                                                                                                                                                                                                                                                                                                                                                                                                                                                                                                                                                                                                                                                                                                                                                                                                                                                                                                                                                                                                                                                                                                                                                                                                                                                                                                                                                                                                                                                                                                                                                                                                                                                                                                                                                           | 1177.7649                                                                          |          |   |   |   |          |          |         |   |          |          |         |    |          |          |          |    |          |          |         |    |         |          |          |   |         |          |         |   |          |          |         |   |          |          |          |   |         |          |          |    |         |         |          |    |         |          |         |   |         |         |          |   |         |         |         |   |         |         |         |   |         |          |         |   |         |          |         |   |         |         |         |   |          |         |          |   |         |         |         |   |          |         |         |   |          |         |          |   |          |         |          |   |          |         |          |   |         |         |         |   |          |         |         |   |          |         |         |   |          |         |         |   |          |         |         |   |          |         |         |   |          |         |         |                                                                                                                                                                                                                                                                                                                                                                                                                                                                                                                                                                                                                                                                                                                                                                                                                                                                                                                                                                                                                                                                                                                                                                                                                                                                                                                                                                                                                                                                                                                                                                                                                                                                                                                                                                                                                                                                                                                                                                                                                                                                                                                                                                                                                                                       |           |         |         |         |         |         |         |          |          |          |          |          |          |          |          |          |          |          |          |          |          |          |          |          |          |          |          |          |          |          |          |          |          |          |          |          |          |          |          |          |          |          |          |          |          |          |          |           |           |           |           |           |           |           |           |           |           |           |           |           |           |           |           |           |           |           |           |           |           |           |           |           |           |           |           |           |           |           |           |           |           |           |           |           |           |           |           |           |           |           |           |           |           |           |           |           |           |           |           |
| 1196.8891          | 1237.3302                                                                                                                                                                                                                                                                                                                                                                                                                                                                                                                                                                                                                                                                                                                                                                                                                                                                                                                                                                                                                                                                                                                                                                                                                                                                                                                                                                                                                                                                                                                                                                                                                                                                                                                                                                                                                                                                                                                                                                                                                                                                                                                                                                                                                                                                                                                                                           | 1245.0150                                                                          |          |   |   |   |          |          |         |   |          |          |         |    |          |          |          |    |          |          |         |    |         |          |          |   |         |          |         |   |          |          |         |   |          |          |          |   |         |          |          |    |         |         |          |    |         |          |         |   |         |         |          |   |         |         |         |   |         |         |         |   |         |          |         |   |         |          |         |   |         |         |         |   |          |         |          |   |         |         |         |   |          |         |         |   |          |         |          |   |          |         |          |   |          |         |          |   |         |         |         |   |          |         |         |   |          |         |         |   |          |         |         |   |          |         |         |   |          |         |         |   |          |         |         |                                                                                                                                                                                                                                                                                                                                                                                                                                                                                                                                                                                                                                                                                                                                                                                                                                                                                                                                                                                                                                                                                                                                                                                                                                                                                                                                                                                                                                                                                                                                                                                                                                                                                                                                                                                                                                                                                                                                                                                                                                                                                                                                                                                                                                                       |           |         |         |         |         |         |         |          |          |          |          |          |          |          |          |          |          |          |          |          |          |          |          |          |          |          |          |          |          |          |          |          |          |          |          |          |          |          |          |          |          |          |          |          |          |          |          |           |           |           |           |           |           |           |           |           |           |           |           |           |           |           |           |           |           |           |           |           |           |           |           |           |           |           |           |           |           |           |           |           |           |           |           |           |           |           |           |           |           |           |           |           |           |           |           |           |           |           |           |
| 1246.1807          | 1249.8651                                                                                                                                                                                                                                                                                                                                                                                                                                                                                                                                                                                                                                                                                                                                                                                                                                                                                                                                                                                                                                                                                                                                                                                                                                                                                                                                                                                                                                                                                                                                                                                                                                                                                                                                                                                                                                                                                                                                                                                                                                                                                                                                                                                                                                                                                                                                                           | 1285.2098                                                                          |          |   |   |   |          |          |         |   |          |          |         |    |          |          |          |    |          |          |         |    |         |          |          |   |         |          |         |   |          |          |         |   |          |          |          |   |         |          |          |    |         |         |          |    |         |          |         |   |         |         |          |   |         |         |         |   |         |         |         |   |         |          |         |   |         |          |         |   |         |         |         |   |          |         |          |   |         |         |         |   |          |         |         |   |          |         |          |   |          |         |          |   |          |         |          |   |         |         |         |   |          |         |         |   |          |         |         |   |          |         |         |   |          |         |         |   |          |         |         |   |          |         |         |                                                                                                                                                                                                                                                                                                                                                                                                                                                                                                                                                                                                                                                                                                                                                                                                                                                                                                                                                                                                                                                                                                                                                                                                                                                                                                                                                                                                                                                                                                                                                                                                                                                                                                                                                                                                                                                                                                                                                                                                                                                                                                                                                                                                                                                       |           |         |         |         |         |         |         |          |          |          |          |          |          |          |          |          |          |          |          |          |          |          |          |          |          |          |          |          |          |          |          |          |          |          |          |          |          |          |          |          |          |          |          |          |          |          |          |           |           |           |           |           |           |           |           |           |           |           |           |           |           |           |           |           |           |           |           |           |           |           |           |           |           |           |           |           |           |           |           |           |           |           |           |           |           |           |           |           |           |           |           |           |           |           |           |           |           |           |           |
| 1294.3974          | 1334.3632                                                                                                                                                                                                                                                                                                                                                                                                                                                                                                                                                                                                                                                                                                                                                                                                                                                                                                                                                                                                                                                                                                                                                                                                                                                                                                                                                                                                                                                                                                                                                                                                                                                                                                                                                                                                                                                                                                                                                                                                                                                                                                                                                                                                                                                                                                                                                           | 1337.5554                                                                          |          |   |   |   |          |          |         |   |          |          |         |    |          |          |          |    |          |          |         |    |         |          |          |   |         |          |         |   |          |          |         |   |          |          |          |   |         |          |          |    |         |         |          |    |         |          |         |   |         |         |          |   |         |         |         |   |         |         |         |   |         |          |         |   |         |          |         |   |         |         |         |   |          |         |          |   |         |         |         |   |          |         |         |   |          |         |          |   |          |         |          |   |          |         |          |   |         |         |         |   |          |         |         |   |          |         |         |   |          |         |         |   |          |         |         |   |          |         |         |   |          |         |         |                                                                                                                                                                                                                                                                                                                                                                                                                                                                                                                                                                                                                                                                                                                                                                                                                                                                                                                                                                                                                                                                                                                                                                                                                                                                                                                                                                                                                                                                                                                                                                                                                                                                                                                                                                                                                                                                                                                                                                                                                                                                                                                                                                                                                                                       |           |         |         |         |         |         |         |          |          |          |          |          |          |          |          |          |          |          |          |          |          |          |          |          |          |          |          |          |          |          |          |          |          |          |          |          |          |          |          |          |          |          |          |          |          |          |          |           |           |           |           |           |           |           |           |           |           |           |           |           |           |           |           |           |           |           |           |           |           |           |           |           |           |           |           |           |           |           |           |           |           |           |           |           |           |           |           |           |           |           |           |           |           |           |           |           |           |           |           |
| 1365.1458          | 1368.1285                                                                                                                                                                                                                                                                                                                                                                                                                                                                                                                                                                                                                                                                                                                                                                                                                                                                                                                                                                                                                                                                                                                                                                                                                                                                                                                                                                                                                                                                                                                                                                                                                                                                                                                                                                                                                                                                                                                                                                                                                                                                                                                                                                                                                                                                                                                                                           | 1370.2336                                                                          |          |   |   |   |          |          |         |   |          |          |         |    |          |          |          |    |          |          |         |    |         |          |          |   |         |          |         |   |          |          |         |   |          |          |          |   |         |          |          |    |         |         |          |    |         |          |         |   |         |         |          |   |         |         |         |   |         |         |         |   |         |          |         |   |         |          |         |   |         |         |         |   |          |         |          |   |         |         |         |   |          |         |         |   |          |         |          |   |          |         |          |   |          |         |          |   |         |         |         |   |          |         |         |   |          |         |         |   |          |         |         |   |          |         |         |   |          |         |         |   |          |         |         |                                                                                                                                                                                                                                                                                                                                                                                                                                                                                                                                                                                                                                                                                                                                                                                                                                                                                                                                                                                                                                                                                                                                                                                                                                                                                                                                                                                                                                                                                                                                                                                                                                                                                                                                                                                                                                                                                                                                                                                                                                                                                                                                                                                                                                                       |           |         |         |         |         |         |         |          |          |          |          |          |          |          |          |          |          |          |          |          |          |          |          |          |          |          |          |          |          |          |          |          |          |          |          |          |          |          |          |          |          |          |          |          |          |          |          |           |           |           |           |           |           |           |           |           |           |           |           |           |           |           |           |           |           |           |           |           |           |           |           |           |           |           |           |           |           |           |           |           |           |           |           |           |           |           |           |           |           |           |           |           |           |           |           |           |           |           |           |
| 1371.9770          | 1453.9671                                                                                                                                                                                                                                                                                                                                                                                                                                                                                                                                                                                                                                                                                                                                                                                                                                                                                                                                                                                                                                                                                                                                                                                                                                                                                                                                                                                                                                                                                                                                                                                                                                                                                                                                                                                                                                                                                                                                                                                                                                                                                                                                                                                                                                                                                                                                                           | 1462.2514                                                                          |          |   |   |   |          |          |         |   |          |          |         |    |          |          |          |    |          |          |         |    |         |          |          |   |         |          |         |   |          |          |         |   |          |          |          |   |         |          |          |    |         |         |          |    |         |          |         |   |         |         |          |   |         |         |         |   |         |         |         |   |         |          |         |   |         |          |         |   |         |         |         |   |          |         |          |   |         |         |         |   |          |         |         |   |          |         |          |   |          |         |          |   |          |         |          |   |         |         |         |   |          |         |         |   |          |         |         |   |          |         |         |   |          |         |         |   |          |         |         |   |          |         |         |                                                                                                                                                                                                                                                                                                                                                                                                                                                                                                                                                                                                                                                                                                                                                                                                                                                                                                                                                                                                                                                                                                                                                                                                                                                                                                                                                                                                                                                                                                                                                                                                                                                                                                                                                                                                                                                                                                                                                                                                                                                                                                                                                                                                                                                       |           |         |         |         |         |         |         |          |          |          |          |          |          |          |          |          |          |          |          |          |          |          |          |          |          |          |          |          |          |          |          |          |          |          |          |          |          |          |          |          |          |          |          |          |          |          |          |           |           |           |           |           |           |           |           |           |           |           |           |           |           |           |           |           |           |           |           |           |           |           |           |           |           |           |           |           |           |           |           |           |           |           |           |           |           |           |           |           |           |           |           |           |           |           |           |           |           |           |           |
| 1474.5510          | 1477.1829                                                                                                                                                                                                                                                                                                                                                                                                                                                                                                                                                                                                                                                                                                                                                                                                                                                                                                                                                                                                                                                                                                                                                                                                                                                                                                                                                                                                                                                                                                                                                                                                                                                                                                                                                                                                                                                                                                                                                                                                                                                                                                                                                                                                                                                                                                                                                           | 1500.1896                                                                          |          |   |   |   |          |          |         |   |          |          |         |    |          |          |          |    |          |          |         |    |         |          |          |   |         |          |         |   |          |          |         |   |          |          |          |   |         |          |          |    |         |         |          |    |         |          |         |   |         |         |          |   |         |         |         |   |         |         |         |   |         |          |         |   |         |          |         |   |         |         |         |   |          |         |          |   |         |         |         |   |          |         |         |   |          |         |          |   |          |         |          |   |          |         |          |   |         |         |         |   |          |         |         |   |          |         |         |   |          |         |         |   |          |         |         |   |          |         |         |   |          |         |         |                                                                                                                                                                                                                                                                                                                                                                                                                                                                                                                                                                                                                                                                                                                                                                                                                                                                                                                                                                                                                                                                                                                                                                                                                                                                                                                                                                                                                                                                                                                                                                                                                                                                                                                                                                                                                                                                                                                                                                                                                                                                                                                                                                                                                                                       |           |         |         |         |         |         |         |          |          |          |          |          |          |          |          |          |          |          |          |          |          |          |          |          |          |          |          |          |          |          |          |          |          |          |          |          |          |          |          |          |          |          |          |          |          |          |          |           |           |           |           |           |           |           |           |           |           |           |           |           |           |           |           |           |           |           |           |           |           |           |           |           |           |           |           |           |           |           |           |           |           |           |           |           |           |           |           |           |           |           |           |           |           |           |           |           |           |           |           |
| 1520.9065          | 1651.6735                                                                                                                                                                                                                                                                                                                                                                                                                                                                                                                                                                                                                                                                                                                                                                                                                                                                                                                                                                                                                                                                                                                                                                                                                                                                                                                                                                                                                                                                                                                                                                                                                                                                                                                                                                                                                                                                                                                                                                                                                                                                                                                                                                                                                                                                                                                                                           | 1664.5359                                                                          |          |   |   |   |          |          |         |   |          |          |         |    |          |          |          |    |          |          |         |    |         |          |          |   |         |          |         |   |          |          |         |   |          |          |          |   |         |          |          |    |         |         |          |    |         |          |         |   |         |         |          |   |         |         |         |   |         |         |         |   |         |          |         |   |         |          |         |   |         |         |         |   |          |         |          |   |         |         |         |   |          |         |         |   |          |         |          |   |          |         |          |   |          |         |          |   |         |         |         |   |          |         |         |   |          |         |         |   |          |         |         |   |          |         |         |   |          |         |         |   |          |         |         |                                                                                                                                                                                                                                                                                                                                                                                                                                                                                                                                                                                                                                                                                                                                                                                                                                                                                                                                                                                                                                                                                                                                                                                                                                                                                                                                                                                                                                                                                                                                                                                                                                                                                                                                                                                                                                                                                                                                                                                                                                                                                                                                                                                                                                                       |           |         |         |         |         |         |         |          |          |          |          |          |          |          |          |          |          |          |          |          |          |          |          |          |          |          |          |          |          |          |          |          |          |          |          |          |          |          |          |          |          |          |          |          |          |          |          |           |           |           |           |           |           |           |           |           |           |           |           |           |           |           |           |           |           |           |           |           |           |           |           |           |           |           |           |           |           |           |           |           |           |           |           |           |           |           |           |           |           |           |           |           |           |           |           |           |           |           |           |
| 3040.2763          | 3075.3613                                                                                                                                                                                                                                                                                                                                                                                                                                                                                                                                                                                                                                                                                                                                                                                                                                                                                                                                                                                                                                                                                                                                                                                                                                                                                                                                                                                                                                                                                                                                                                                                                                                                                                                                                                                                                                                                                                                                                                                                                                                                                                                                                                                                                                                                                                                                                           | 3115.4136                                                                          |          |   |   |   |          |          |         |   |          |          |         |    |          |          |          |    |          |          |         |    |         |          |          |   |         |          |         |   |          |          |         |   |          |          |          |   |         |          |          |    |         |         |          |    |         |          |         |   |         |         |          |   |         |         |         |   |         |         |         |   |         |          |         |   |         |          |         |   |         |         |         |   |          |         |          |   |         |         |         |   |          |         |         |   |          |         |          |   |          |         |          |   |          |         |          |   |         |         |         |   |          |         |         |   |          |         |         |   |          |         |         |   |          |         |         |   |          |         |         |   |          |         |         |                                                                                                                                                                                                                                                                                                                                                                                                                                                                                                                                                                                                                                                                                                                                                                                                                                                                                                                                                                                                                                                                                                                                                                                                                                                                                                                                                                                                                                                                                                                                                                                                                                                                                                                                                                                                                                                                                                                                                                                                                                                                                                                                                                                                                                                       |           |         |         |         |         |         |         |          |          |          |          |          |          |          |          |          |          |          |          |          |          |          |          |          |          |          |          |          |          |          |          |          |          |          |          |          |          |          |          |          |          |          |          |          |          |          |          |           |           |           |           |           |           |           |           |           |           |           |           |           |           |           |           |           |           |           |           |           |           |           |           |           |           |           |           |           |           |           |           |           |           |           |           |           |           |           |           |           |           |           |           |           |           |           |           |           |           |           |           |
| 3126.9491          | 3140.0911                                                                                                                                                                                                                                                                                                                                                                                                                                                                                                                                                                                                                                                                                                                                                                                                                                                                                                                                                                                                                                                                                                                                                                                                                                                                                                                                                                                                                                                                                                                                                                                                                                                                                                                                                                                                                                                                                                                                                                                                                                                                                                                                                                                                                                                                                                                                                           | 3154.2663                                                                          |          |   |   |   |          |          |         |   |          |          |         |    |          |          |          |    |          |          |         |    |         |          |          |   |         |          |         |   |          |          |         |   |          |          |          |   |         |          |          |    |         |         |          |    |         |          |         |   |         |         |          |   |         |         |         |   |         |         |         |   |         |          |         |   |         |          |         |   |         |         |         |   |          |         |          |   |         |         |         |   |          |         |         |   |          |         |          |   |          |         |          |   |          |         |          |   |         |         |         |   |          |         |         |   |          |         |         |   |          |         |         |   |          |         |         |   |          |         |         |   |          |         |         |                                                                                                                                                                                                                                                                                                                                                                                                                                                                                                                                                                                                                                                                                                                                                                                                                                                                                                                                                                                                                                                                                                                                                                                                                                                                                                                                                                                                                                                                                                                                                                                                                                                                                                                                                                                                                                                                                                                                                                                                                                                                                                                                                                                                                                                       |           |         |         |         |         |         |         |          |          |          |          |          |          |          |          |          |          |          |          |          |          |          |          |          |          |          |          |          |          |          |          |          |          |          |          |          |          |          |          |          |          |          |          |          |          |          |          |           |           |           |           |           |           |           |           |           |           |           |           |           |           |           |           |           |           |           |           |           |           |           |           |           |           |           |           |           |           |           |           |           |           |           |           |           |           |           |           |           |           |           |           |           |           |           |           |           |           |           |           |
| 3163.7816          | 3166.5864                                                                                                                                                                                                                                                                                                                                                                                                                                                                                                                                                                                                                                                                                                                                                                                                                                                                                                                                                                                                                                                                                                                                                                                                                                                                                                                                                                                                                                                                                                                                                                                                                                                                                                                                                                                                                                                                                                                                                                                                                                                                                                                                                                                                                                                                                                                                                           | 3169.4363                                                                          |          |   |   |   |          |          |         |   |          |          |         |    |          |          |          |    |          |          |         |    |         |          |          |   |         |          |         |   |          |          |         |   |          |          |          |   |         |          |          |    |         |         |          |    |         |          |         |   |         |         |          |   |         |         |         |   |         |         |         |   |         |          |         |   |         |          |         |   |         |         |         |   |          |         |          |   |         |         |         |   |          |         |         |   |          |         |          |   |          |         |          |   |          |         |          |   |         |         |         |   |          |         |         |   |          |         |         |   |          |         |         |   |          |         |         |   |          |         |         |   |          |         |         |                                                                                                                                                                                                                                                                                                                                                                                                                                                                                                                                                                                                                                                                                                                                                                                                                                                                                                                                                                                                                                                                                                                                                                                                                                                                                                                                                                                                                                                                                                                                                                                                                                                                                                                                                                                                                                                                                                                                                                                                                                                                                                                                                                                                                                                       |           |         |         |         |         |         |         |          |          |          |          |          |          |          |          |          |          |          |          |          |          |          |          |          |          |          |          |          |          |          |          |          |          |          |          |          |          |          |          |          |          |          |          |          |          |          |          |           |           |           |           |           |           |           |           |           |           |           |           |           |           |           |           |           |           |           |           |           |           |           |           |           |           |           |           |           |           |           |           |           |           |           |           |           |           |           |           |           |           |           |           |           |           |           |           |           |           |           |           |
| 3174.7606          | 3176.1851                                                                                                                                                                                                                                                                                                                                                                                                                                                                                                                                                                                                                                                                                                                                                                                                                                                                                                                                                                                                                                                                                                                                                                                                                                                                                                                                                                                                                                                                                                                                                                                                                                                                                                                                                                                                                                                                                                                                                                                                                                                                                                                                                                                                                                                                                                                                                           | 3184.6749                                                                          |          |   |   |   |          |          |         |   |          |          |         |    |          |          |          |    |          |          |         |    |         |          |          |   |         |          |         |   |          |          |         |   |          |          |          |   |         |          |          |    |         |         |          |    |         |          |         |   |         |         |          |   |         |         |         |   |         |         |         |   |         |          |         |   |         |          |         |   |         |         |         |   |          |         |          |   |         |         |         |   |          |         |         |   |          |         |          |   |          |         |          |   |          |         |          |   |         |         |         |   |          |         |         |   |          |         |         |   |          |         |         |   |          |         |         |   |          |         |         |   |          |         |         |                                                                                                                                                                                                                                                                                                                                                                                                                                                                                                                                                                                                                                                                                                                                                                                                                                                                                                                                                                                                                                                                                                                                                                                                                                                                                                                                                                                                                                                                                                                                                                                                                                                                                                                                                                                                                                                                                                                                                                                                                                                                                                                                                                                                                                                       |           |         |         |         |         |         |         |          |          |          |          |          |          |          |          |          |          |          |          |          |          |          |          |          |          |          |          |          |          |          |          |          |          |          |          |          |          |          |          |          |          |          |          |          |          |          |          |           |           |           |           |           |           |           |           |           |           |           |           |           |           |           |           |           |           |           |           |           |           |           |           |           |           |           |           |           |           |           |           |           |           |           |           |           |           |           |           |           |           |           |           |           |           |           |           |           |           |           |           |
| 3214.8120          | 3264.8363                                                                                                                                                                                                                                                                                                                                                                                                                                                                                                                                                                                                                                                                                                                                                                                                                                                                                                                                                                                                                                                                                                                                                                                                                                                                                                                                                                                                                                                                                                                                                                                                                                                                                                                                                                                                                                                                                                                                                                                                                                                                                                                                                                                                                                                                                                                                                           | 3275.4659                                                                          |          |   |   |   |          |          |         |   |          |          |         |    |          |          |          |    |          |          |         |    |         |          |          |   |         |          |         |   |          |          |         |   |          |          |          |   |         |          |          |    |         |         |          |    |         |          |         |   |         |         |          |   |         |         |         |   |         |         |         |   |         |          |         |   |         |          |         |   |         |         |         |   |          |         |          |   |         |         |         |   |          |         |         |   |          |         |          |   |          |         |          |   |          |         |          |   |         |         |         |   |          |         |         |   |          |         |         |   |          |         |         |   |          |         |         |   |          |         |         |   |          |         |         |                                                                                                                                                                                                                                                                                                                                                                                                                                                                                                                                                                                                                                                                                                                                                                                                                                                                                                                                                                                                                                                                                                                                                                                                                                                                                                                                                                                                                                                                                                                                                                                                                                                                                                                                                                                                                                                                                                                                                                                                                                                                                                                                                                                                                                                       |           |         |         |         |         |         |         |          |          |          |          |          |          |          |          |          |          |          |          |          |          |          |          |          |          |          |          |          |          |          |          |          |          |          |          |          |          |          |          |          |          |          |          |          |          |          |          |           |           |           |           |           |           |           |           |           |           |           |           |           |           |           |           |           |           |           |           |           |           |           |           |           |           |           |           |           |           |           |           |           |           |           |           |           |           |           |           |           |           |           |           |           |           |           |           |           |           |           |           |
| 3286.3935          | 3293.3991                                                                                                                                                                                                                                                                                                                                                                                                                                                                                                                                                                                                                                                                                                                                                                                                                                                                                                                                                                                                                                                                                                                                                                                                                                                                                                                                                                                                                                                                                                                                                                                                                                                                                                                                                                                                                                                                                                                                                                                                                                                                                                                                                                                                                                                                                                                                                           | 3826.6949                                                                          |          |   |   |   |          |          |         |   |          |          |         |    |          |          |          |    |          |          |         |    |         |          |          |   |         |          |         |   |          |          |         |   |          |          |          |   |         |          |          |    |         |         |          |    |         |          |         |   |         |         |          |   |         |         |         |   |         |         |         |   |         |          |         |   |         |          |         |   |         |         |         |   |          |         |          |   |         |         |         |   |          |         |         |   |          |         |          |   |          |         |          |   |          |         |          |   |         |         |         |   |          |         |         |   |          |         |         |   |          |         |         |   |          |         |         |   |          |         |         |   |          |         |         |                                                                                                                                                                                                                                                                                                                                                                                                                                                                                                                                                                                                                                                                                                                                                                                                                                                                                                                                                                                                                                                                                                                                                                                                                                                                                                                                                                                                                                                                                                                                                                                                                                                                                                                                                                                                                                                                                                                                                                                                                                                                                                                                                                                                                                                       |           |         |         |         |         |         |         |          |          |          |          |          |          |          |          |          |          |          |          |          |          |          |          |          |          |          |          |          |          |          |          |          |          |          |          |          |          |          |          |          |          |          |          |          |          |          |          |           |           |           |           |           |           |           |           |           |           |           |           |           |           |           |           |           |           |           |           |           |           |           |           |           |           |           |           |           |           |           |           |           |           |           |           |           |           |           |           |           |           |           |           |           |           |           |           |           |           |           |           |

|    |          |         |          |
|----|----------|---------|----------|
| H  | -2.30448 | 3.80497 | -0.45397 |
| H  | -1.08115 | 3.94439 | 0.81559  |
| H  | -1.09995 | 1.90136 | 2.69917  |
| H  | 0.06204  | 2.42233 | -0.74191 |
| Ni | 2.53696  | 0.00736 | -0.10570 |

**Statistical Thermodynamic Analysis**

|                                      |                                               |
|--------------------------------------|-----------------------------------------------|
| Temperature=298.15 K                 | Pressure=1 atm                                |
| Zero-point correction= 0.268655      | Electronic Energy = -2595.96647739            |
| Internal Energy (E)= -2595.67471239  | Enthalpy (H)= -2595.67376839                  |
| Gibbs Free Energy (G)=-2595.75089039 | Gibbs Free Energy of Solvation=-2595.77057005 |



| St.Pt.                              | General Structure | Ball & Stick model        |          |           |           |           |
|-------------------------------------|-------------------|---------------------------|----------|-----------|-----------|-----------|
| 1NiI <sub>2</sub>                   |                   |                           |          |           |           |           |
| <b><u>Cartesian co-ordinate</u></b> |                   | <b><u>Frequencies</u></b> |          |           |           |           |
| -----<br>Atoms                      | X                 | Y                         | Z        |           |           |           |
| -----                               |                   |                           |          |           |           |           |
| C                                   | -0.31364          | -2.82085                  | 0.58414  | 26.6449   | 34.4959   | 55.1358   |
| C                                   | -0.19195          | -1.93532                  | 1.59543  | 65.8873   | 76.5789   | 78.7543   |
| Pt                                  | -1.21560          | -0.66252                  | -0.33339 | 102.3721  | 121.1336  | 134.8549  |
| Cl                                  | -3.33254          | -1.33527                  | 0.36861  | 140.9659  | 145.4525  | 154.3422  |
| Cl                                  | 0.90515           | -0.23814                  | -1.48212 | 162.6721  | 170.5861  | 172.7304  |
| H                                   | 0.74852           | -1.41576                  | 1.75824  | 183.2805  | 187.0241  | 196.2096  |
| H                                   | -0.98994          | -1.79355                  | 2.31874  | 209.1788  | 230.7292  | 234.8852  |
| H                                   | -1.21840          | -3.41107                  | 0.46721  | 264.7114  | 274.9336  | 291.3615  |
| H                                   | 0.52763           | -3.01303                  | -0.07697 | 297.8003  | 298.7145  | 312.2643  |
| Cl                                  | 2.40261           | 2.39622                   | -0.39529 | 331.4871  | 344.8162  | 360.2846  |
| Cl                                  | 3.07032           | -1.98823                  | 0.19505  | 375.5107  | 455.4839  | 459.4984  |
| H                                   | 5.07425           | 1.47335                   | -0.19596 | 474.8530  | 514.7667  | 574.1486  |
| C                                   | 4.89590           | 0.57026                   | 0.38070  | 624.0974  | 663.9538  | 793.9093  |
| C                                   | 4.18938           | 0.61609                   | 1.53485  | 826.0607  | 829.0413  | 841.2073  |
| H                                   | 5.34192           | -0.35993                  | 0.04200  | 841.9266  | 860.0316  | 880.1268  |
| H                                   | 4.06458           | -0.27611                  | 2.14056  | 919.3525  | 955.2708  | 1009.7931 |
| H                                   | 3.79350           | 1.55726                   | 1.90426  | 1031.8006 | 1040.9254 | 1046.9163 |
| C                                   | -1.58459          | 2.04967                   | -0.56861 | 1048.0553 | 1059.1149 | 1062.7239 |
| O                                   | 0.05130           | 1.46182                   | 1.22811  | 1063.6971 | 1081.2581 | 1101.0271 |
| C                                   | -1.15962          | 1.37297                   | 0.73045  | 1147.7203 | 1177.6591 | 1183.4128 |
| C                                   | -1.98991          | 0.84391                   | -1.44026 | 1202.9961 | 1238.9657 | 1244.3536 |
| H                                   | -3.07023          | 0.72296                   | -1.52731 | 1248.6068 | 1290.1030 | 1310.5018 |
| H                                   | -1.50919          | 0.84448                   | -2.41901 | 1322.5040 | 1330.8478 | 1361.5841 |
| H                                   | 0.71360           | 1.80004                   | 0.56950  | 1365.4312 | 1370.0933 | 1398.0560 |
| C                                   | -2.28652          | 1.44441                   | 1.74613  | 1453.9880 | 1465.3853 | 1466.4269 |
| H                                   | -2.51613          | 0.49227                   | 2.22350  | 1476.1944 | 1500.8859 | 1506.5057 |
| C                                   | -3.45576          | 2.06570                   | 0.96859  | 1523.9036 | 1654.2282 | 1658.9293 |
| H                                   | -4.06179          | 1.27372                   | 0.52198  | 3084.4605 | 3086.9031 | 3119.0771 |
| H                                   | -4.10218          | 2.66072                   | 1.61628  | 3120.2737 | 3123.1410 | 3146.2814 |
| C                                   | -2.77368          | 2.91292                   | -0.12136 | 3164.5196 | 3174.0106 | 3174.3867 |
|                                     |                   |                           |          | 3181.0047 | 3182.5192 | 3189.5609 |
|                                     |                   |                           |          | 3203.2163 | 3255.1804 | 3261.7697 |

|    |          |         |          |           |           |           |
|----|----------|---------|----------|-----------|-----------|-----------|
| H  | -3.43480 | 3.14865 | -0.95914 | 3278.9571 | 3282.3034 | 3300.0941 |
| H  | -2.40956 | 3.85597 | 0.30128  |           |           |           |
| H  | -1.91419 | 2.13336 | 2.51426  |           |           |           |
| H  | -0.75227 | 2.60402 | -1.01357 |           |           |           |
| Ni | 2.72747  | 0.17067 | -0.14761 |           |           |           |

**Statistical Thermodynamic Analysis**

Temperature=298.15 K

Pressure=1 atm

Zero-point correction= 0.269557

Electronic Energy = -2595.98829040

Internal Energy (E)= -2595.6952274

Enthalpy (H)= -2595.6942834

Gibbs Free Energy (G)=-2595.7730994

Gibbs Free Energy of Solvation=-2595.7885481

| St.Pt.            | General Structure                                                                                                                                                                                                                                                                                                                                                                                                                                                                                                                                                                                                                                                                                                                                                                                                                                                                                                                                                                                                                                                                                                                                                                                                                                                                                                                                                                                                                                                                                                                                                                                                                                                                                                                                                                                                                                                                                                                                                                                                                                                                                                                                                                                                                                                                                                                                                                                                                                                                                                                                                                     | Ball & Stick model |          |   |   |   |          |          |         |   |          |          |          |    |         |          |         |    |         |          |          |    |          |         |         |   |          |          |          |   |          |          |          |   |          |          |         |   |          |          |         |    |          |          |         |    |          |         |          |   |          |         |          |   |          |         |          |   |          |         |          |   |          |         |          |   |          |         |          |   |          |         |          |   |         |         |          |   |         |         |         |   |         |         |         |   |         |          |         |   |         |         |          |   |         |          |         |   |         |          |         |   |         |         |          |   |         |         |          |   |         |         |         |   |         |         |         |   |         |         |          |   |         |         |         |   |         |         |         |   |         |         |          |   |         |         |          |                                                                                                                                                                                                                                                                                                                                                                                                                                                                                                                                                                                                                                                                                                                                                                                                                                                                                                                                                                                                                                                                                                                                                                                                                                                                                                                                                                                                                                                                                                                                                                                                                                                                                                                                                                                                                                                                                                                                                                                                                                                                                                                                                                                                                                                    |         |         |         |         |         |         |         |         |          |          |          |          |          |          |          |          |          |          |          |          |          |          |          |          |          |          |          |          |          |          |          |          |          |          |          |          |          |          |          |          |          |          |          |          |          |          |          |           |           |           |           |           |           |           |           |           |           |           |           |           |           |           |           |           |           |           |           |           |           |           |           |           |           |           |           |           |           |           |           |           |           |           |           |           |           |           |           |           |           |           |           |           |           |           |           |           |           |           |           |
|-------------------|---------------------------------------------------------------------------------------------------------------------------------------------------------------------------------------------------------------------------------------------------------------------------------------------------------------------------------------------------------------------------------------------------------------------------------------------------------------------------------------------------------------------------------------------------------------------------------------------------------------------------------------------------------------------------------------------------------------------------------------------------------------------------------------------------------------------------------------------------------------------------------------------------------------------------------------------------------------------------------------------------------------------------------------------------------------------------------------------------------------------------------------------------------------------------------------------------------------------------------------------------------------------------------------------------------------------------------------------------------------------------------------------------------------------------------------------------------------------------------------------------------------------------------------------------------------------------------------------------------------------------------------------------------------------------------------------------------------------------------------------------------------------------------------------------------------------------------------------------------------------------------------------------------------------------------------------------------------------------------------------------------------------------------------------------------------------------------------------------------------------------------------------------------------------------------------------------------------------------------------------------------------------------------------------------------------------------------------------------------------------------------------------------------------------------------------------------------------------------------------------------------------------------------------------------------------------------------------|--------------------|----------|---|---|---|----------|----------|---------|---|----------|----------|----------|----|---------|----------|---------|----|---------|----------|----------|----|----------|---------|---------|---|----------|----------|----------|---|----------|----------|----------|---|----------|----------|---------|---|----------|----------|---------|----|----------|----------|---------|----|----------|---------|----------|---|----------|---------|----------|---|----------|---------|----------|---|----------|---------|----------|---|----------|---------|----------|---|----------|---------|----------|---|----------|---------|----------|---|---------|---------|----------|---|---------|---------|---------|---|---------|---------|---------|---|---------|----------|---------|---|---------|---------|----------|---|---------|----------|---------|---|---------|----------|---------|---|---------|---------|----------|---|---------|---------|----------|---|---------|---------|---------|---|---------|---------|---------|---|---------|---------|----------|---|---------|---------|---------|---|---------|---------|---------|---|---------|---------|----------|---|---------|---------|----------|----------------------------------------------------------------------------------------------------------------------------------------------------------------------------------------------------------------------------------------------------------------------------------------------------------------------------------------------------------------------------------------------------------------------------------------------------------------------------------------------------------------------------------------------------------------------------------------------------------------------------------------------------------------------------------------------------------------------------------------------------------------------------------------------------------------------------------------------------------------------------------------------------------------------------------------------------------------------------------------------------------------------------------------------------------------------------------------------------------------------------------------------------------------------------------------------------------------------------------------------------------------------------------------------------------------------------------------------------------------------------------------------------------------------------------------------------------------------------------------------------------------------------------------------------------------------------------------------------------------------------------------------------------------------------------------------------------------------------------------------------------------------------------------------------------------------------------------------------------------------------------------------------------------------------------------------------------------------------------------------------------------------------------------------------------------------------------------------------------------------------------------------------------------------------------------------------------------------------------------------------|---------|---------|---------|---------|---------|---------|---------|---------|----------|----------|----------|----------|----------|----------|----------|----------|----------|----------|----------|----------|----------|----------|----------|----------|----------|----------|----------|----------|----------|----------|----------|----------|----------|----------|----------|----------|----------|----------|----------|----------|----------|----------|----------|----------|----------|----------|----------|-----------|-----------|-----------|-----------|-----------|-----------|-----------|-----------|-----------|-----------|-----------|-----------|-----------|-----------|-----------|-----------|-----------|-----------|-----------|-----------|-----------|-----------|-----------|-----------|-----------|-----------|-----------|-----------|-----------|-----------|-----------|-----------|-----------|-----------|-----------|-----------|-----------|-----------|-----------|-----------|-----------|-----------|-----------|-----------|-----------|-----------|-----------|-----------|-----------|-----------|-----------|-----------|
| 1NiI <sub>3</sub> |                                                                                                                                                                                                                                                                                                                                                                                                                                                                                                                                                                                                                                                                                                                                                                                                                                                                                                                                                                                                                                                                                                                                                                                                                                                                                                                                                                                                                                                                                                                                                                                                                                                                                                                                                                                                                                                                                                                                                                                                                                                                                                                                                                                                                                                                                                                                                                                                                                                                                                                                                                                       |                    |          |   |   |   |          |          |         |   |          |          |          |    |         |          |         |    |         |          |          |    |          |         |         |   |          |          |          |   |          |          |          |   |          |          |         |   |          |          |         |    |          |          |         |    |          |         |          |   |          |         |          |   |          |         |          |   |          |         |          |   |          |         |          |   |          |         |          |   |          |         |          |   |         |         |          |   |         |         |         |   |         |         |         |   |         |          |         |   |         |         |          |   |         |          |         |   |         |          |         |   |         |         |          |   |         |         |          |   |         |         |         |   |         |         |         |   |         |         |          |   |         |         |         |   |         |         |         |   |         |         |          |   |         |         |          |                                                                                                                                                                                                                                                                                                                                                                                                                                                                                                                                                                                                                                                                                                                                                                                                                                                                                                                                                                                                                                                                                                                                                                                                                                                                                                                                                                                                                                                                                                                                                                                                                                                                                                                                                                                                                                                                                                                                                                                                                                                                                                                                                                                                                                                    |         |         |         |         |         |         |         |         |          |          |          |          |          |          |          |          |          |          |          |          |          |          |          |          |          |          |          |          |          |          |          |          |          |          |          |          |          |          |          |          |          |          |          |          |          |          |          |           |           |           |           |           |           |           |           |           |           |           |           |           |           |           |           |           |           |           |           |           |           |           |           |           |           |           |           |           |           |           |           |           |           |           |           |           |           |           |           |           |           |           |           |           |           |           |           |           |           |           |           |
|                   | <p style="text-align: center;"><b><u>Cartesian co-ordinate</u></b></p> <table border="1"> <thead> <tr> <th>Atoms</th> <th>X</th> <th>Y</th> <th>Z</th> </tr> </thead> <tbody> <tr><td>C</td><td>-1.37115</td><td>-2.79142</td><td>0.09604</td></tr> <tr><td>C</td><td>-1.37786</td><td>-2.13159</td><td>-1.08964</td></tr> <tr><td>Pt</td><td>0.52504</td><td>-1.33298</td><td>0.16822</td></tr> <tr><td>Cl</td><td>1.81797</td><td>-2.71702</td><td>-1.19233</td></tr> <tr><td>Cl</td><td>-0.73262</td><td>0.23697</td><td>1.64108</td></tr> <tr><td>H</td><td>-2.03441</td><td>-1.27811</td><td>-1.23694</td></tr> <tr><td>H</td><td>-0.85236</td><td>-2.51513</td><td>-1.95762</td></tr> <tr><td>H</td><td>-0.84759</td><td>-3.73657</td><td>0.20343</td></tr> <tr><td>H</td><td>-2.00210</td><td>-2.45636</td><td>0.91558</td></tr> <tr><td>Cl</td><td>-3.79726</td><td>-0.14949</td><td>0.82611</td></tr> <tr><td>Cl</td><td>-0.50230</td><td>2.26162</td><td>-0.98931</td></tr> <tr><td>H</td><td>-3.97554</td><td>0.42435</td><td>-1.88949</td></tr> <tr><td>C</td><td>-3.37293</td><td>1.32740</td><td>-1.90422</td></tr> <tr><td>C</td><td>-3.65658</td><td>2.35303</td><td>-1.06589</td></tr> <tr><td>H</td><td>-2.58458</td><td>1.42004</td><td>-2.64528</td></tr> <tr><td>H</td><td>-3.09804</td><td>3.28247</td><td>-1.12069</td></tr> <tr><td>H</td><td>-4.48326</td><td>2.28094</td><td>-0.36596</td></tr> <tr><td>C</td><td>2.54980</td><td>0.85004</td><td>-0.03456</td></tr> <tr><td>O</td><td>1.34482</td><td>2.32302</td><td>1.51710</td></tr> <tr><td>C</td><td>2.23497</td><td>2.12324</td><td>0.65029</td></tr> <tr><td>C</td><td>2.24926</td><td>-0.43661</td><td>0.74773</td></tr> <tr><td>H</td><td>1.91482</td><td>0.91028</td><td>-0.94021</td></tr> <tr><td>H</td><td>3.06591</td><td>-1.13763</td><td>0.56361</td></tr> <tr><td>H</td><td>2.22146</td><td>-0.23535</td><td>1.82689</td></tr> <tr><td>C</td><td>4.00352</td><td>1.09659</td><td>-0.49602</td></tr> <tr><td>C</td><td>4.02764</td><td>2.59364</td><td>-0.83869</td></tr> <tr><td>C</td><td>3.17016</td><td>3.21947</td><td>0.27282</td></tr> <tr><td>H</td><td>0.68657</td><td>1.55429</td><td>1.61439</td></tr> <tr><td>H</td><td>4.26105</td><td>0.44686</td><td>-1.33320</td></tr> <tr><td>H</td><td>3.76691</td><td>3.43944</td><td>1.16941</td></tr> <tr><td>H</td><td>2.61678</td><td>4.12800</td><td>0.02082</td></tr> <tr><td>H</td><td>5.03288</td><td>3.01458</td><td>-0.87565</td></tr> <tr><td>H</td><td>3.55204</td><td>2.76350</td><td>-1.80911</td></tr> </tbody> </table> | Atoms              | X        | Y | Z | C | -1.37115 | -2.79142 | 0.09604 | C | -1.37786 | -2.13159 | -1.08964 | Pt | 0.52504 | -1.33298 | 0.16822 | Cl | 1.81797 | -2.71702 | -1.19233 | Cl | -0.73262 | 0.23697 | 1.64108 | H | -2.03441 | -1.27811 | -1.23694 | H | -0.85236 | -2.51513 | -1.95762 | H | -0.84759 | -3.73657 | 0.20343 | H | -2.00210 | -2.45636 | 0.91558 | Cl | -3.79726 | -0.14949 | 0.82611 | Cl | -0.50230 | 2.26162 | -0.98931 | H | -3.97554 | 0.42435 | -1.88949 | C | -3.37293 | 1.32740 | -1.90422 | C | -3.65658 | 2.35303 | -1.06589 | H | -2.58458 | 1.42004 | -2.64528 | H | -3.09804 | 3.28247 | -1.12069 | H | -4.48326 | 2.28094 | -0.36596 | C | 2.54980 | 0.85004 | -0.03456 | O | 1.34482 | 2.32302 | 1.51710 | C | 2.23497 | 2.12324 | 0.65029 | C | 2.24926 | -0.43661 | 0.74773 | H | 1.91482 | 0.91028 | -0.94021 | H | 3.06591 | -1.13763 | 0.56361 | H | 2.22146 | -0.23535 | 1.82689 | C | 4.00352 | 1.09659 | -0.49602 | C | 4.02764 | 2.59364 | -0.83869 | C | 3.17016 | 3.21947 | 0.27282 | H | 0.68657 | 1.55429 | 1.61439 | H | 4.26105 | 0.44686 | -1.33320 | H | 3.76691 | 3.43944 | 1.16941 | H | 2.61678 | 4.12800 | 0.02082 | H | 5.03288 | 3.01458 | -0.87565 | H | 3.55204 | 2.76350 | -1.80911 | <p style="text-align: center;"><b><u>Frequencies</u></b></p> <table border="1"> <tbody> <tr><td>30.5138</td><td>40.4902</td><td>49.2117</td></tr> <tr><td>58.3919</td><td>62.3528</td><td>75.0709</td></tr> <tr><td>79.1747</td><td>97.3333</td><td>113.8269</td></tr> <tr><td>120.7758</td><td>139.0774</td><td>152.9466</td></tr> <tr><td>158.0680</td><td>168.4735</td><td>176.2207</td></tr> <tr><td>188.8974</td><td>195.7003</td><td>196.8103</td></tr> <tr><td>211.3972</td><td>218.2958</td><td>220.9511</td></tr> <tr><td>238.6298</td><td>247.4184</td><td>292.4182</td></tr> <tr><td>300.1103</td><td>322.3272</td><td>324.8378</td></tr> <tr><td>332.5202</td><td>333.3439</td><td>351.3476</td></tr> <tr><td>380.9674</td><td>456.6758</td><td>471.4587</td></tr> <tr><td>530.7060</td><td>547.5189</td><td>573.2550</td></tr> <tr><td>617.2714</td><td>661.2115</td><td>731.9460</td></tr> <tr><td>797.6596</td><td>817.1980</td><td>858.5664</td></tr> <tr><td>867.7341</td><td>903.5284</td><td>931.9373</td></tr> <tr><td>947.1486</td><td>995.3016</td><td>1007.7174</td></tr> <tr><td>1027.2569</td><td>1036.1191</td><td>1050.6399</td></tr> <tr><td>1052.7481</td><td>1057.4788</td><td>1064.8115</td></tr> <tr><td>1069.6756</td><td>1099.6001</td><td>1130.6411</td></tr> <tr><td>1167.9056</td><td>1189.8788</td><td>1207.3459</td></tr> <tr><td>1215.5036</td><td>1224.8320</td><td>1249.0547</td></tr> <tr><td>1252.9884</td><td>1278.0648</td><td>1318.8309</td></tr> <tr><td>1324.1149</td><td>1337.0359</td><td>1353.5014</td></tr> <tr><td>1354.6805</td><td>1371.9930</td><td>1430.9479</td></tr> <tr><td>1456.4726</td><td>1460.6209</td><td>1471.9521</td></tr> <tr><td>1486.1913</td><td>1509.5231</td><td>1521.7252</td></tr> <tr><td>1644.4346</td><td>1656.7480</td><td>1712.9293</td></tr> <tr><td>2910.2164</td><td>2999.3910</td><td>3058.3524</td></tr> <tr><td>3068.8336</td><td>3081.8845</td><td>3108.6605</td></tr> <tr><td>3149.4686</td><td>3149.7221</td><td>3166.7957</td></tr> <tr><td>3169.0846</td><td>3172.5006</td><td>3174.2848</td></tr> <tr><td>3181.8310</td><td>3192.4767</td><td>3262.5704</td></tr> <tr><td>3278.7822</td><td>3281.9627</td><td>3301.8380</td></tr> </tbody> </table> | 30.5138 | 40.4902 | 49.2117 | 58.3919 | 62.3528 | 75.0709 | 79.1747 | 97.3333 | 113.8269 | 120.7758 | 139.0774 | 152.9466 | 158.0680 | 168.4735 | 176.2207 | 188.8974 | 195.7003 | 196.8103 | 211.3972 | 218.2958 | 220.9511 | 238.6298 | 247.4184 | 292.4182 | 300.1103 | 322.3272 | 324.8378 | 332.5202 | 333.3439 | 351.3476 | 380.9674 | 456.6758 | 471.4587 | 530.7060 | 547.5189 | 573.2550 | 617.2714 | 661.2115 | 731.9460 | 797.6596 | 817.1980 | 858.5664 | 867.7341 | 903.5284 | 931.9373 | 947.1486 | 995.3016 | 1007.7174 | 1027.2569 | 1036.1191 | 1050.6399 | 1052.7481 | 1057.4788 | 1064.8115 | 1069.6756 | 1099.6001 | 1130.6411 | 1167.9056 | 1189.8788 | 1207.3459 | 1215.5036 | 1224.8320 | 1249.0547 | 1252.9884 | 1278.0648 | 1318.8309 | 1324.1149 | 1337.0359 | 1353.5014 | 1354.6805 | 1371.9930 | 1430.9479 | 1456.4726 | 1460.6209 | 1471.9521 | 1486.1913 | 1509.5231 | 1521.7252 | 1644.4346 | 1656.7480 | 1712.9293 | 2910.2164 | 2999.3910 | 3058.3524 | 3068.8336 | 3081.8845 | 3108.6605 | 3149.4686 | 3149.7221 | 3166.7957 | 3169.0846 | 3172.5006 | 3174.2848 | 3181.8310 | 3192.4767 | 3262.5704 | 3278.7822 | 3281.9627 | 3301.8380 |
| Atoms             | X                                                                                                                                                                                                                                                                                                                                                                                                                                                                                                                                                                                                                                                                                                                                                                                                                                                                                                                                                                                                                                                                                                                                                                                                                                                                                                                                                                                                                                                                                                                                                                                                                                                                                                                                                                                                                                                                                                                                                                                                                                                                                                                                                                                                                                                                                                                                                                                                                                                                                                                                                                                     | Y                  | Z        |   |   |   |          |          |         |   |          |          |          |    |         |          |         |    |         |          |          |    |          |         |         |   |          |          |          |   |          |          |          |   |          |          |         |   |          |          |         |    |          |          |         |    |          |         |          |   |          |         |          |   |          |         |          |   |          |         |          |   |          |         |          |   |          |         |          |   |          |         |          |   |         |         |          |   |         |         |         |   |         |         |         |   |         |          |         |   |         |         |          |   |         |          |         |   |         |          |         |   |         |         |          |   |         |         |          |   |         |         |         |   |         |         |         |   |         |         |          |   |         |         |         |   |         |         |         |   |         |         |          |   |         |         |          |                                                                                                                                                                                                                                                                                                                                                                                                                                                                                                                                                                                                                                                                                                                                                                                                                                                                                                                                                                                                                                                                                                                                                                                                                                                                                                                                                                                                                                                                                                                                                                                                                                                                                                                                                                                                                                                                                                                                                                                                                                                                                                                                                                                                                                                    |         |         |         |         |         |         |         |         |          |          |          |          |          |          |          |          |          |          |          |          |          |          |          |          |          |          |          |          |          |          |          |          |          |          |          |          |          |          |          |          |          |          |          |          |          |          |          |           |           |           |           |           |           |           |           |           |           |           |           |           |           |           |           |           |           |           |           |           |           |           |           |           |           |           |           |           |           |           |           |           |           |           |           |           |           |           |           |           |           |           |           |           |           |           |           |           |           |           |           |
| C                 | -1.37115                                                                                                                                                                                                                                                                                                                                                                                                                                                                                                                                                                                                                                                                                                                                                                                                                                                                                                                                                                                                                                                                                                                                                                                                                                                                                                                                                                                                                                                                                                                                                                                                                                                                                                                                                                                                                                                                                                                                                                                                                                                                                                                                                                                                                                                                                                                                                                                                                                                                                                                                                                              | -2.79142           | 0.09604  |   |   |   |          |          |         |   |          |          |          |    |         |          |         |    |         |          |          |    |          |         |         |   |          |          |          |   |          |          |          |   |          |          |         |   |          |          |         |    |          |          |         |    |          |         |          |   |          |         |          |   |          |         |          |   |          |         |          |   |          |         |          |   |          |         |          |   |          |         |          |   |         |         |          |   |         |         |         |   |         |         |         |   |         |          |         |   |         |         |          |   |         |          |         |   |         |          |         |   |         |         |          |   |         |         |          |   |         |         |         |   |         |         |         |   |         |         |          |   |         |         |         |   |         |         |         |   |         |         |          |   |         |         |          |                                                                                                                                                                                                                                                                                                                                                                                                                                                                                                                                                                                                                                                                                                                                                                                                                                                                                                                                                                                                                                                                                                                                                                                                                                                                                                                                                                                                                                                                                                                                                                                                                                                                                                                                                                                                                                                                                                                                                                                                                                                                                                                                                                                                                                                    |         |         |         |         |         |         |         |         |          |          |          |          |          |          |          |          |          |          |          |          |          |          |          |          |          |          |          |          |          |          |          |          |          |          |          |          |          |          |          |          |          |          |          |          |          |          |          |           |           |           |           |           |           |           |           |           |           |           |           |           |           |           |           |           |           |           |           |           |           |           |           |           |           |           |           |           |           |           |           |           |           |           |           |           |           |           |           |           |           |           |           |           |           |           |           |           |           |           |           |
| C                 | -1.37786                                                                                                                                                                                                                                                                                                                                                                                                                                                                                                                                                                                                                                                                                                                                                                                                                                                                                                                                                                                                                                                                                                                                                                                                                                                                                                                                                                                                                                                                                                                                                                                                                                                                                                                                                                                                                                                                                                                                                                                                                                                                                                                                                                                                                                                                                                                                                                                                                                                                                                                                                                              | -2.13159           | -1.08964 |   |   |   |          |          |         |   |          |          |          |    |         |          |         |    |         |          |          |    |          |         |         |   |          |          |          |   |          |          |          |   |          |          |         |   |          |          |         |    |          |          |         |    |          |         |          |   |          |         |          |   |          |         |          |   |          |         |          |   |          |         |          |   |          |         |          |   |          |         |          |   |         |         |          |   |         |         |         |   |         |         |         |   |         |          |         |   |         |         |          |   |         |          |         |   |         |          |         |   |         |         |          |   |         |         |          |   |         |         |         |   |         |         |         |   |         |         |          |   |         |         |         |   |         |         |         |   |         |         |          |   |         |         |          |                                                                                                                                                                                                                                                                                                                                                                                                                                                                                                                                                                                                                                                                                                                                                                                                                                                                                                                                                                                                                                                                                                                                                                                                                                                                                                                                                                                                                                                                                                                                                                                                                                                                                                                                                                                                                                                                                                                                                                                                                                                                                                                                                                                                                                                    |         |         |         |         |         |         |         |         |          |          |          |          |          |          |          |          |          |          |          |          |          |          |          |          |          |          |          |          |          |          |          |          |          |          |          |          |          |          |          |          |          |          |          |          |          |          |          |           |           |           |           |           |           |           |           |           |           |           |           |           |           |           |           |           |           |           |           |           |           |           |           |           |           |           |           |           |           |           |           |           |           |           |           |           |           |           |           |           |           |           |           |           |           |           |           |           |           |           |           |
| Pt                | 0.52504                                                                                                                                                                                                                                                                                                                                                                                                                                                                                                                                                                                                                                                                                                                                                                                                                                                                                                                                                                                                                                                                                                                                                                                                                                                                                                                                                                                                                                                                                                                                                                                                                                                                                                                                                                                                                                                                                                                                                                                                                                                                                                                                                                                                                                                                                                                                                                                                                                                                                                                                                                               | -1.33298           | 0.16822  |   |   |   |          |          |         |   |          |          |          |    |         |          |         |    |         |          |          |    |          |         |         |   |          |          |          |   |          |          |          |   |          |          |         |   |          |          |         |    |          |          |         |    |          |         |          |   |          |         |          |   |          |         |          |   |          |         |          |   |          |         |          |   |          |         |          |   |          |         |          |   |         |         |          |   |         |         |         |   |         |         |         |   |         |          |         |   |         |         |          |   |         |          |         |   |         |          |         |   |         |         |          |   |         |         |          |   |         |         |         |   |         |         |         |   |         |         |          |   |         |         |         |   |         |         |         |   |         |         |          |   |         |         |          |                                                                                                                                                                                                                                                                                                                                                                                                                                                                                                                                                                                                                                                                                                                                                                                                                                                                                                                                                                                                                                                                                                                                                                                                                                                                                                                                                                                                                                                                                                                                                                                                                                                                                                                                                                                                                                                                                                                                                                                                                                                                                                                                                                                                                                                    |         |         |         |         |         |         |         |         |          |          |          |          |          |          |          |          |          |          |          |          |          |          |          |          |          |          |          |          |          |          |          |          |          |          |          |          |          |          |          |          |          |          |          |          |          |          |          |           |           |           |           |           |           |           |           |           |           |           |           |           |           |           |           |           |           |           |           |           |           |           |           |           |           |           |           |           |           |           |           |           |           |           |           |           |           |           |           |           |           |           |           |           |           |           |           |           |           |           |           |
| Cl                | 1.81797                                                                                                                                                                                                                                                                                                                                                                                                                                                                                                                                                                                                                                                                                                                                                                                                                                                                                                                                                                                                                                                                                                                                                                                                                                                                                                                                                                                                                                                                                                                                                                                                                                                                                                                                                                                                                                                                                                                                                                                                                                                                                                                                                                                                                                                                                                                                                                                                                                                                                                                                                                               | -2.71702           | -1.19233 |   |   |   |          |          |         |   |          |          |          |    |         |          |         |    |         |          |          |    |          |         |         |   |          |          |          |   |          |          |          |   |          |          |         |   |          |          |         |    |          |          |         |    |          |         |          |   |          |         |          |   |          |         |          |   |          |         |          |   |          |         |          |   |          |         |          |   |          |         |          |   |         |         |          |   |         |         |         |   |         |         |         |   |         |          |         |   |         |         |          |   |         |          |         |   |         |          |         |   |         |         |          |   |         |         |          |   |         |         |         |   |         |         |         |   |         |         |          |   |         |         |         |   |         |         |         |   |         |         |          |   |         |         |          |                                                                                                                                                                                                                                                                                                                                                                                                                                                                                                                                                                                                                                                                                                                                                                                                                                                                                                                                                                                                                                                                                                                                                                                                                                                                                                                                                                                                                                                                                                                                                                                                                                                                                                                                                                                                                                                                                                                                                                                                                                                                                                                                                                                                                                                    |         |         |         |         |         |         |         |         |          |          |          |          |          |          |          |          |          |          |          |          |          |          |          |          |          |          |          |          |          |          |          |          |          |          |          |          |          |          |          |          |          |          |          |          |          |          |          |           |           |           |           |           |           |           |           |           |           |           |           |           |           |           |           |           |           |           |           |           |           |           |           |           |           |           |           |           |           |           |           |           |           |           |           |           |           |           |           |           |           |           |           |           |           |           |           |           |           |           |           |
| Cl                | -0.73262                                                                                                                                                                                                                                                                                                                                                                                                                                                                                                                                                                                                                                                                                                                                                                                                                                                                                                                                                                                                                                                                                                                                                                                                                                                                                                                                                                                                                                                                                                                                                                                                                                                                                                                                                                                                                                                                                                                                                                                                                                                                                                                                                                                                                                                                                                                                                                                                                                                                                                                                                                              | 0.23697            | 1.64108  |   |   |   |          |          |         |   |          |          |          |    |         |          |         |    |         |          |          |    |          |         |         |   |          |          |          |   |          |          |          |   |          |          |         |   |          |          |         |    |          |          |         |    |          |         |          |   |          |         |          |   |          |         |          |   |          |         |          |   |          |         |          |   |          |         |          |   |          |         |          |   |         |         |          |   |         |         |         |   |         |         |         |   |         |          |         |   |         |         |          |   |         |          |         |   |         |          |         |   |         |         |          |   |         |         |          |   |         |         |         |   |         |         |         |   |         |         |          |   |         |         |         |   |         |         |         |   |         |         |          |   |         |         |          |                                                                                                                                                                                                                                                                                                                                                                                                                                                                                                                                                                                                                                                                                                                                                                                                                                                                                                                                                                                                                                                                                                                                                                                                                                                                                                                                                                                                                                                                                                                                                                                                                                                                                                                                                                                                                                                                                                                                                                                                                                                                                                                                                                                                                                                    |         |         |         |         |         |         |         |         |          |          |          |          |          |          |          |          |          |          |          |          |          |          |          |          |          |          |          |          |          |          |          |          |          |          |          |          |          |          |          |          |          |          |          |          |          |          |          |           |           |           |           |           |           |           |           |           |           |           |           |           |           |           |           |           |           |           |           |           |           |           |           |           |           |           |           |           |           |           |           |           |           |           |           |           |           |           |           |           |           |           |           |           |           |           |           |           |           |           |           |
| H                 | -2.03441                                                                                                                                                                                                                                                                                                                                                                                                                                                                                                                                                                                                                                                                                                                                                                                                                                                                                                                                                                                                                                                                                                                                                                                                                                                                                                                                                                                                                                                                                                                                                                                                                                                                                                                                                                                                                                                                                                                                                                                                                                                                                                                                                                                                                                                                                                                                                                                                                                                                                                                                                                              | -1.27811           | -1.23694 |   |   |   |          |          |         |   |          |          |          |    |         |          |         |    |         |          |          |    |          |         |         |   |          |          |          |   |          |          |          |   |          |          |         |   |          |          |         |    |          |          |         |    |          |         |          |   |          |         |          |   |          |         |          |   |          |         |          |   |          |         |          |   |          |         |          |   |          |         |          |   |         |         |          |   |         |         |         |   |         |         |         |   |         |          |         |   |         |         |          |   |         |          |         |   |         |          |         |   |         |         |          |   |         |         |          |   |         |         |         |   |         |         |         |   |         |         |          |   |         |         |         |   |         |         |         |   |         |         |          |   |         |         |          |                                                                                                                                                                                                                                                                                                                                                                                                                                                                                                                                                                                                                                                                                                                                                                                                                                                                                                                                                                                                                                                                                                                                                                                                                                                                                                                                                                                                                                                                                                                                                                                                                                                                                                                                                                                                                                                                                                                                                                                                                                                                                                                                                                                                                                                    |         |         |         |         |         |         |         |         |          |          |          |          |          |          |          |          |          |          |          |          |          |          |          |          |          |          |          |          |          |          |          |          |          |          |          |          |          |          |          |          |          |          |          |          |          |          |          |           |           |           |           |           |           |           |           |           |           |           |           |           |           |           |           |           |           |           |           |           |           |           |           |           |           |           |           |           |           |           |           |           |           |           |           |           |           |           |           |           |           |           |           |           |           |           |           |           |           |           |           |
| H                 | -0.85236                                                                                                                                                                                                                                                                                                                                                                                                                                                                                                                                                                                                                                                                                                                                                                                                                                                                                                                                                                                                                                                                                                                                                                                                                                                                                                                                                                                                                                                                                                                                                                                                                                                                                                                                                                                                                                                                                                                                                                                                                                                                                                                                                                                                                                                                                                                                                                                                                                                                                                                                                                              | -2.51513           | -1.95762 |   |   |   |          |          |         |   |          |          |          |    |         |          |         |    |         |          |          |    |          |         |         |   |          |          |          |   |          |          |          |   |          |          |         |   |          |          |         |    |          |          |         |    |          |         |          |   |          |         |          |   |          |         |          |   |          |         |          |   |          |         |          |   |          |         |          |   |          |         |          |   |         |         |          |   |         |         |         |   |         |         |         |   |         |          |         |   |         |         |          |   |         |          |         |   |         |          |         |   |         |         |          |   |         |         |          |   |         |         |         |   |         |         |         |   |         |         |          |   |         |         |         |   |         |         |         |   |         |         |          |   |         |         |          |                                                                                                                                                                                                                                                                                                                                                                                                                                                                                                                                                                                                                                                                                                                                                                                                                                                                                                                                                                                                                                                                                                                                                                                                                                                                                                                                                                                                                                                                                                                                                                                                                                                                                                                                                                                                                                                                                                                                                                                                                                                                                                                                                                                                                                                    |         |         |         |         |         |         |         |         |          |          |          |          |          |          |          |          |          |          |          |          |          |          |          |          |          |          |          |          |          |          |          |          |          |          |          |          |          |          |          |          |          |          |          |          |          |          |          |           |           |           |           |           |           |           |           |           |           |           |           |           |           |           |           |           |           |           |           |           |           |           |           |           |           |           |           |           |           |           |           |           |           |           |           |           |           |           |           |           |           |           |           |           |           |           |           |           |           |           |           |
| H                 | -0.84759                                                                                                                                                                                                                                                                                                                                                                                                                                                                                                                                                                                                                                                                                                                                                                                                                                                                                                                                                                                                                                                                                                                                                                                                                                                                                                                                                                                                                                                                                                                                                                                                                                                                                                                                                                                                                                                                                                                                                                                                                                                                                                                                                                                                                                                                                                                                                                                                                                                                                                                                                                              | -3.73657           | 0.20343  |   |   |   |          |          |         |   |          |          |          |    |         |          |         |    |         |          |          |    |          |         |         |   |          |          |          |   |          |          |          |   |          |          |         |   |          |          |         |    |          |          |         |    |          |         |          |   |          |         |          |   |          |         |          |   |          |         |          |   |          |         |          |   |          |         |          |   |          |         |          |   |         |         |          |   |         |         |         |   |         |         |         |   |         |          |         |   |         |         |          |   |         |          |         |   |         |          |         |   |         |         |          |   |         |         |          |   |         |         |         |   |         |         |         |   |         |         |          |   |         |         |         |   |         |         |         |   |         |         |          |   |         |         |          |                                                                                                                                                                                                                                                                                                                                                                                                                                                                                                                                                                                                                                                                                                                                                                                                                                                                                                                                                                                                                                                                                                                                                                                                                                                                                                                                                                                                                                                                                                                                                                                                                                                                                                                                                                                                                                                                                                                                                                                                                                                                                                                                                                                                                                                    |         |         |         |         |         |         |         |         |          |          |          |          |          |          |          |          |          |          |          |          |          |          |          |          |          |          |          |          |          |          |          |          |          |          |          |          |          |          |          |          |          |          |          |          |          |          |          |           |           |           |           |           |           |           |           |           |           |           |           |           |           |           |           |           |           |           |           |           |           |           |           |           |           |           |           |           |           |           |           |           |           |           |           |           |           |           |           |           |           |           |           |           |           |           |           |           |           |           |           |
| H                 | -2.00210                                                                                                                                                                                                                                                                                                                                                                                                                                                                                                                                                                                                                                                                                                                                                                                                                                                                                                                                                                                                                                                                                                                                                                                                                                                                                                                                                                                                                                                                                                                                                                                                                                                                                                                                                                                                                                                                                                                                                                                                                                                                                                                                                                                                                                                                                                                                                                                                                                                                                                                                                                              | -2.45636           | 0.91558  |   |   |   |          |          |         |   |          |          |          |    |         |          |         |    |         |          |          |    |          |         |         |   |          |          |          |   |          |          |          |   |          |          |         |   |          |          |         |    |          |          |         |    |          |         |          |   |          |         |          |   |          |         |          |   |          |         |          |   |          |         |          |   |          |         |          |   |          |         |          |   |         |         |          |   |         |         |         |   |         |         |         |   |         |          |         |   |         |         |          |   |         |          |         |   |         |          |         |   |         |         |          |   |         |         |          |   |         |         |         |   |         |         |         |   |         |         |          |   |         |         |         |   |         |         |         |   |         |         |          |   |         |         |          |                                                                                                                                                                                                                                                                                                                                                                                                                                                                                                                                                                                                                                                                                                                                                                                                                                                                                                                                                                                                                                                                                                                                                                                                                                                                                                                                                                                                                                                                                                                                                                                                                                                                                                                                                                                                                                                                                                                                                                                                                                                                                                                                                                                                                                                    |         |         |         |         |         |         |         |         |          |          |          |          |          |          |          |          |          |          |          |          |          |          |          |          |          |          |          |          |          |          |          |          |          |          |          |          |          |          |          |          |          |          |          |          |          |          |          |           |           |           |           |           |           |           |           |           |           |           |           |           |           |           |           |           |           |           |           |           |           |           |           |           |           |           |           |           |           |           |           |           |           |           |           |           |           |           |           |           |           |           |           |           |           |           |           |           |           |           |           |
| Cl                | -3.79726                                                                                                                                                                                                                                                                                                                                                                                                                                                                                                                                                                                                                                                                                                                                                                                                                                                                                                                                                                                                                                                                                                                                                                                                                                                                                                                                                                                                                                                                                                                                                                                                                                                                                                                                                                                                                                                                                                                                                                                                                                                                                                                                                                                                                                                                                                                                                                                                                                                                                                                                                                              | -0.14949           | 0.82611  |   |   |   |          |          |         |   |          |          |          |    |         |          |         |    |         |          |          |    |          |         |         |   |          |          |          |   |          |          |          |   |          |          |         |   |          |          |         |    |          |          |         |    |          |         |          |   |          |         |          |   |          |         |          |   |          |         |          |   |          |         |          |   |          |         |          |   |          |         |          |   |         |         |          |   |         |         |         |   |         |         |         |   |         |          |         |   |         |         |          |   |         |          |         |   |         |          |         |   |         |         |          |   |         |         |          |   |         |         |         |   |         |         |         |   |         |         |          |   |         |         |         |   |         |         |         |   |         |         |          |   |         |         |          |                                                                                                                                                                                                                                                                                                                                                                                                                                                                                                                                                                                                                                                                                                                                                                                                                                                                                                                                                                                                                                                                                                                                                                                                                                                                                                                                                                                                                                                                                                                                                                                                                                                                                                                                                                                                                                                                                                                                                                                                                                                                                                                                                                                                                                                    |         |         |         |         |         |         |         |         |          |          |          |          |          |          |          |          |          |          |          |          |          |          |          |          |          |          |          |          |          |          |          |          |          |          |          |          |          |          |          |          |          |          |          |          |          |          |          |           |           |           |           |           |           |           |           |           |           |           |           |           |           |           |           |           |           |           |           |           |           |           |           |           |           |           |           |           |           |           |           |           |           |           |           |           |           |           |           |           |           |           |           |           |           |           |           |           |           |           |           |
| Cl                | -0.50230                                                                                                                                                                                                                                                                                                                                                                                                                                                                                                                                                                                                                                                                                                                                                                                                                                                                                                                                                                                                                                                                                                                                                                                                                                                                                                                                                                                                                                                                                                                                                                                                                                                                                                                                                                                                                                                                                                                                                                                                                                                                                                                                                                                                                                                                                                                                                                                                                                                                                                                                                                              | 2.26162            | -0.98931 |   |   |   |          |          |         |   |          |          |          |    |         |          |         |    |         |          |          |    |          |         |         |   |          |          |          |   |          |          |          |   |          |          |         |   |          |          |         |    |          |          |         |    |          |         |          |   |          |         |          |   |          |         |          |   |          |         |          |   |          |         |          |   |          |         |          |   |          |         |          |   |         |         |          |   |         |         |         |   |         |         |         |   |         |          |         |   |         |         |          |   |         |          |         |   |         |          |         |   |         |         |          |   |         |         |          |   |         |         |         |   |         |         |         |   |         |         |          |   |         |         |         |   |         |         |         |   |         |         |          |   |         |         |          |                                                                                                                                                                                                                                                                                                                                                                                                                                                                                                                                                                                                                                                                                                                                                                                                                                                                                                                                                                                                                                                                                                                                                                                                                                                                                                                                                                                                                                                                                                                                                                                                                                                                                                                                                                                                                                                                                                                                                                                                                                                                                                                                                                                                                                                    |         |         |         |         |         |         |         |         |          |          |          |          |          |          |          |          |          |          |          |          |          |          |          |          |          |          |          |          |          |          |          |          |          |          |          |          |          |          |          |          |          |          |          |          |          |          |          |           |           |           |           |           |           |           |           |           |           |           |           |           |           |           |           |           |           |           |           |           |           |           |           |           |           |           |           |           |           |           |           |           |           |           |           |           |           |           |           |           |           |           |           |           |           |           |           |           |           |           |           |
| H                 | -3.97554                                                                                                                                                                                                                                                                                                                                                                                                                                                                                                                                                                                                                                                                                                                                                                                                                                                                                                                                                                                                                                                                                                                                                                                                                                                                                                                                                                                                                                                                                                                                                                                                                                                                                                                                                                                                                                                                                                                                                                                                                                                                                                                                                                                                                                                                                                                                                                                                                                                                                                                                                                              | 0.42435            | -1.88949 |   |   |   |          |          |         |   |          |          |          |    |         |          |         |    |         |          |          |    |          |         |         |   |          |          |          |   |          |          |          |   |          |          |         |   |          |          |         |    |          |          |         |    |          |         |          |   |          |         |          |   |          |         |          |   |          |         |          |   |          |         |          |   |          |         |          |   |          |         |          |   |         |         |          |   |         |         |         |   |         |         |         |   |         |          |         |   |         |         |          |   |         |          |         |   |         |          |         |   |         |         |          |   |         |         |          |   |         |         |         |   |         |         |         |   |         |         |          |   |         |         |         |   |         |         |         |   |         |         |          |   |         |         |          |                                                                                                                                                                                                                                                                                                                                                                                                                                                                                                                                                                                                                                                                                                                                                                                                                                                                                                                                                                                                                                                                                                                                                                                                                                                                                                                                                                                                                                                                                                                                                                                                                                                                                                                                                                                                                                                                                                                                                                                                                                                                                                                                                                                                                                                    |         |         |         |         |         |         |         |         |          |          |          |          |          |          |          |          |          |          |          |          |          |          |          |          |          |          |          |          |          |          |          |          |          |          |          |          |          |          |          |          |          |          |          |          |          |          |          |           |           |           |           |           |           |           |           |           |           |           |           |           |           |           |           |           |           |           |           |           |           |           |           |           |           |           |           |           |           |           |           |           |           |           |           |           |           |           |           |           |           |           |           |           |           |           |           |           |           |           |           |
| C                 | -3.37293                                                                                                                                                                                                                                                                                                                                                                                                                                                                                                                                                                                                                                                                                                                                                                                                                                                                                                                                                                                                                                                                                                                                                                                                                                                                                                                                                                                                                                                                                                                                                                                                                                                                                                                                                                                                                                                                                                                                                                                                                                                                                                                                                                                                                                                                                                                                                                                                                                                                                                                                                                              | 1.32740            | -1.90422 |   |   |   |          |          |         |   |          |          |          |    |         |          |         |    |         |          |          |    |          |         |         |   |          |          |          |   |          |          |          |   |          |          |         |   |          |          |         |    |          |          |         |    |          |         |          |   |          |         |          |   |          |         |          |   |          |         |          |   |          |         |          |   |          |         |          |   |          |         |          |   |         |         |          |   |         |         |         |   |         |         |         |   |         |          |         |   |         |         |          |   |         |          |         |   |         |          |         |   |         |         |          |   |         |         |          |   |         |         |         |   |         |         |         |   |         |         |          |   |         |         |         |   |         |         |         |   |         |         |          |   |         |         |          |                                                                                                                                                                                                                                                                                                                                                                                                                                                                                                                                                                                                                                                                                                                                                                                                                                                                                                                                                                                                                                                                                                                                                                                                                                                                                                                                                                                                                                                                                                                                                                                                                                                                                                                                                                                                                                                                                                                                                                                                                                                                                                                                                                                                                                                    |         |         |         |         |         |         |         |         |          |          |          |          |          |          |          |          |          |          |          |          |          |          |          |          |          |          |          |          |          |          |          |          |          |          |          |          |          |          |          |          |          |          |          |          |          |          |          |           |           |           |           |           |           |           |           |           |           |           |           |           |           |           |           |           |           |           |           |           |           |           |           |           |           |           |           |           |           |           |           |           |           |           |           |           |           |           |           |           |           |           |           |           |           |           |           |           |           |           |           |
| C                 | -3.65658                                                                                                                                                                                                                                                                                                                                                                                                                                                                                                                                                                                                                                                                                                                                                                                                                                                                                                                                                                                                                                                                                                                                                                                                                                                                                                                                                                                                                                                                                                                                                                                                                                                                                                                                                                                                                                                                                                                                                                                                                                                                                                                                                                                                                                                                                                                                                                                                                                                                                                                                                                              | 2.35303            | -1.06589 |   |   |   |          |          |         |   |          |          |          |    |         |          |         |    |         |          |          |    |          |         |         |   |          |          |          |   |          |          |          |   |          |          |         |   |          |          |         |    |          |          |         |    |          |         |          |   |          |         |          |   |          |         |          |   |          |         |          |   |          |         |          |   |          |         |          |   |          |         |          |   |         |         |          |   |         |         |         |   |         |         |         |   |         |          |         |   |         |         |          |   |         |          |         |   |         |          |         |   |         |         |          |   |         |         |          |   |         |         |         |   |         |         |         |   |         |         |          |   |         |         |         |   |         |         |         |   |         |         |          |   |         |         |          |                                                                                                                                                                                                                                                                                                                                                                                                                                                                                                                                                                                                                                                                                                                                                                                                                                                                                                                                                                                                                                                                                                                                                                                                                                                                                                                                                                                                                                                                                                                                                                                                                                                                                                                                                                                                                                                                                                                                                                                                                                                                                                                                                                                                                                                    |         |         |         |         |         |         |         |         |          |          |          |          |          |          |          |          |          |          |          |          |          |          |          |          |          |          |          |          |          |          |          |          |          |          |          |          |          |          |          |          |          |          |          |          |          |          |          |           |           |           |           |           |           |           |           |           |           |           |           |           |           |           |           |           |           |           |           |           |           |           |           |           |           |           |           |           |           |           |           |           |           |           |           |           |           |           |           |           |           |           |           |           |           |           |           |           |           |           |           |
| H                 | -2.58458                                                                                                                                                                                                                                                                                                                                                                                                                                                                                                                                                                                                                                                                                                                                                                                                                                                                                                                                                                                                                                                                                                                                                                                                                                                                                                                                                                                                                                                                                                                                                                                                                                                                                                                                                                                                                                                                                                                                                                                                                                                                                                                                                                                                                                                                                                                                                                                                                                                                                                                                                                              | 1.42004            | -2.64528 |   |   |   |          |          |         |   |          |          |          |    |         |          |         |    |         |          |          |    |          |         |         |   |          |          |          |   |          |          |          |   |          |          |         |   |          |          |         |    |          |          |         |    |          |         |          |   |          |         |          |   |          |         |          |   |          |         |          |   |          |         |          |   |          |         |          |   |          |         |          |   |         |         |          |   |         |         |         |   |         |         |         |   |         |          |         |   |         |         |          |   |         |          |         |   |         |          |         |   |         |         |          |   |         |         |          |   |         |         |         |   |         |         |         |   |         |         |          |   |         |         |         |   |         |         |         |   |         |         |          |   |         |         |          |                                                                                                                                                                                                                                                                                                                                                                                                                                                                                                                                                                                                                                                                                                                                                                                                                                                                                                                                                                                                                                                                                                                                                                                                                                                                                                                                                                                                                                                                                                                                                                                                                                                                                                                                                                                                                                                                                                                                                                                                                                                                                                                                                                                                                                                    |         |         |         |         |         |         |         |         |          |          |          |          |          |          |          |          |          |          |          |          |          |          |          |          |          |          |          |          |          |          |          |          |          |          |          |          |          |          |          |          |          |          |          |          |          |          |          |           |           |           |           |           |           |           |           |           |           |           |           |           |           |           |           |           |           |           |           |           |           |           |           |           |           |           |           |           |           |           |           |           |           |           |           |           |           |           |           |           |           |           |           |           |           |           |           |           |           |           |           |
| H                 | -3.09804                                                                                                                                                                                                                                                                                                                                                                                                                                                                                                                                                                                                                                                                                                                                                                                                                                                                                                                                                                                                                                                                                                                                                                                                                                                                                                                                                                                                                                                                                                                                                                                                                                                                                                                                                                                                                                                                                                                                                                                                                                                                                                                                                                                                                                                                                                                                                                                                                                                                                                                                                                              | 3.28247            | -1.12069 |   |   |   |          |          |         |   |          |          |          |    |         |          |         |    |         |          |          |    |          |         |         |   |          |          |          |   |          |          |          |   |          |          |         |   |          |          |         |    |          |          |         |    |          |         |          |   |          |         |          |   |          |         |          |   |          |         |          |   |          |         |          |   |          |         |          |   |          |         |          |   |         |         |          |   |         |         |         |   |         |         |         |   |         |          |         |   |         |         |          |   |         |          |         |   |         |          |         |   |         |         |          |   |         |         |          |   |         |         |         |   |         |         |         |   |         |         |          |   |         |         |         |   |         |         |         |   |         |         |          |   |         |         |          |                                                                                                                                                                                                                                                                                                                                                                                                                                                                                                                                                                                                                                                                                                                                                                                                                                                                                                                                                                                                                                                                                                                                                                                                                                                                                                                                                                                                                                                                                                                                                                                                                                                                                                                                                                                                                                                                                                                                                                                                                                                                                                                                                                                                                                                    |         |         |         |         |         |         |         |         |          |          |          |          |          |          |          |          |          |          |          |          |          |          |          |          |          |          |          |          |          |          |          |          |          |          |          |          |          |          |          |          |          |          |          |          |          |          |          |           |           |           |           |           |           |           |           |           |           |           |           |           |           |           |           |           |           |           |           |           |           |           |           |           |           |           |           |           |           |           |           |           |           |           |           |           |           |           |           |           |           |           |           |           |           |           |           |           |           |           |           |
| H                 | -4.48326                                                                                                                                                                                                                                                                                                                                                                                                                                                                                                                                                                                                                                                                                                                                                                                                                                                                                                                                                                                                                                                                                                                                                                                                                                                                                                                                                                                                                                                                                                                                                                                                                                                                                                                                                                                                                                                                                                                                                                                                                                                                                                                                                                                                                                                                                                                                                                                                                                                                                                                                                                              | 2.28094            | -0.36596 |   |   |   |          |          |         |   |          |          |          |    |         |          |         |    |         |          |          |    |          |         |         |   |          |          |          |   |          |          |          |   |          |          |         |   |          |          |         |    |          |          |         |    |          |         |          |   |          |         |          |   |          |         |          |   |          |         |          |   |          |         |          |   |          |         |          |   |          |         |          |   |         |         |          |   |         |         |         |   |         |         |         |   |         |          |         |   |         |         |          |   |         |          |         |   |         |          |         |   |         |         |          |   |         |         |          |   |         |         |         |   |         |         |         |   |         |         |          |   |         |         |         |   |         |         |         |   |         |         |          |   |         |         |          |                                                                                                                                                                                                                                                                                                                                                                                                                                                                                                                                                                                                                                                                                                                                                                                                                                                                                                                                                                                                                                                                                                                                                                                                                                                                                                                                                                                                                                                                                                                                                                                                                                                                                                                                                                                                                                                                                                                                                                                                                                                                                                                                                                                                                                                    |         |         |         |         |         |         |         |         |          |          |          |          |          |          |          |          |          |          |          |          |          |          |          |          |          |          |          |          |          |          |          |          |          |          |          |          |          |          |          |          |          |          |          |          |          |          |          |           |           |           |           |           |           |           |           |           |           |           |           |           |           |           |           |           |           |           |           |           |           |           |           |           |           |           |           |           |           |           |           |           |           |           |           |           |           |           |           |           |           |           |           |           |           |           |           |           |           |           |           |
| C                 | 2.54980                                                                                                                                                                                                                                                                                                                                                                                                                                                                                                                                                                                                                                                                                                                                                                                                                                                                                                                                                                                                                                                                                                                                                                                                                                                                                                                                                                                                                                                                                                                                                                                                                                                                                                                                                                                                                                                                                                                                                                                                                                                                                                                                                                                                                                                                                                                                                                                                                                                                                                                                                                               | 0.85004            | -0.03456 |   |   |   |          |          |         |   |          |          |          |    |         |          |         |    |         |          |          |    |          |         |         |   |          |          |          |   |          |          |          |   |          |          |         |   |          |          |         |    |          |          |         |    |          |         |          |   |          |         |          |   |          |         |          |   |          |         |          |   |          |         |          |   |          |         |          |   |          |         |          |   |         |         |          |   |         |         |         |   |         |         |         |   |         |          |         |   |         |         |          |   |         |          |         |   |         |          |         |   |         |         |          |   |         |         |          |   |         |         |         |   |         |         |         |   |         |         |          |   |         |         |         |   |         |         |         |   |         |         |          |   |         |         |          |                                                                                                                                                                                                                                                                                                                                                                                                                                                                                                                                                                                                                                                                                                                                                                                                                                                                                                                                                                                                                                                                                                                                                                                                                                                                                                                                                                                                                                                                                                                                                                                                                                                                                                                                                                                                                                                                                                                                                                                                                                                                                                                                                                                                                                                    |         |         |         |         |         |         |         |         |          |          |          |          |          |          |          |          |          |          |          |          |          |          |          |          |          |          |          |          |          |          |          |          |          |          |          |          |          |          |          |          |          |          |          |          |          |          |          |           |           |           |           |           |           |           |           |           |           |           |           |           |           |           |           |           |           |           |           |           |           |           |           |           |           |           |           |           |           |           |           |           |           |           |           |           |           |           |           |           |           |           |           |           |           |           |           |           |           |           |           |
| O                 | 1.34482                                                                                                                                                                                                                                                                                                                                                                                                                                                                                                                                                                                                                                                                                                                                                                                                                                                                                                                                                                                                                                                                                                                                                                                                                                                                                                                                                                                                                                                                                                                                                                                                                                                                                                                                                                                                                                                                                                                                                                                                                                                                                                                                                                                                                                                                                                                                                                                                                                                                                                                                                                               | 2.32302            | 1.51710  |   |   |   |          |          |         |   |          |          |          |    |         |          |         |    |         |          |          |    |          |         |         |   |          |          |          |   |          |          |          |   |          |          |         |   |          |          |         |    |          |          |         |    |          |         |          |   |          |         |          |   |          |         |          |   |          |         |          |   |          |         |          |   |          |         |          |   |          |         |          |   |         |         |          |   |         |         |         |   |         |         |         |   |         |          |         |   |         |         |          |   |         |          |         |   |         |          |         |   |         |         |          |   |         |         |          |   |         |         |         |   |         |         |         |   |         |         |          |   |         |         |         |   |         |         |         |   |         |         |          |   |         |         |          |                                                                                                                                                                                                                                                                                                                                                                                                                                                                                                                                                                                                                                                                                                                                                                                                                                                                                                                                                                                                                                                                                                                                                                                                                                                                                                                                                                                                                                                                                                                                                                                                                                                                                                                                                                                                                                                                                                                                                                                                                                                                                                                                                                                                                                                    |         |         |         |         |         |         |         |         |          |          |          |          |          |          |          |          |          |          |          |          |          |          |          |          |          |          |          |          |          |          |          |          |          |          |          |          |          |          |          |          |          |          |          |          |          |          |          |           |           |           |           |           |           |           |           |           |           |           |           |           |           |           |           |           |           |           |           |           |           |           |           |           |           |           |           |           |           |           |           |           |           |           |           |           |           |           |           |           |           |           |           |           |           |           |           |           |           |           |           |
| C                 | 2.23497                                                                                                                                                                                                                                                                                                                                                                                                                                                                                                                                                                                                                                                                                                                                                                                                                                                                                                                                                                                                                                                                                                                                                                                                                                                                                                                                                                                                                                                                                                                                                                                                                                                                                                                                                                                                                                                                                                                                                                                                                                                                                                                                                                                                                                                                                                                                                                                                                                                                                                                                                                               | 2.12324            | 0.65029  |   |   |   |          |          |         |   |          |          |          |    |         |          |         |    |         |          |          |    |          |         |         |   |          |          |          |   |          |          |          |   |          |          |         |   |          |          |         |    |          |          |         |    |          |         |          |   |          |         |          |   |          |         |          |   |          |         |          |   |          |         |          |   |          |         |          |   |          |         |          |   |         |         |          |   |         |         |         |   |         |         |         |   |         |          |         |   |         |         |          |   |         |          |         |   |         |          |         |   |         |         |          |   |         |         |          |   |         |         |         |   |         |         |         |   |         |         |          |   |         |         |         |   |         |         |         |   |         |         |          |   |         |         |          |                                                                                                                                                                                                                                                                                                                                                                                                                                                                                                                                                                                                                                                                                                                                                                                                                                                                                                                                                                                                                                                                                                                                                                                                                                                                                                                                                                                                                                                                                                                                                                                                                                                                                                                                                                                                                                                                                                                                                                                                                                                                                                                                                                                                                                                    |         |         |         |         |         |         |         |         |          |          |          |          |          |          |          |          |          |          |          |          |          |          |          |          |          |          |          |          |          |          |          |          |          |          |          |          |          |          |          |          |          |          |          |          |          |          |          |           |           |           |           |           |           |           |           |           |           |           |           |           |           |           |           |           |           |           |           |           |           |           |           |           |           |           |           |           |           |           |           |           |           |           |           |           |           |           |           |           |           |           |           |           |           |           |           |           |           |           |           |
| C                 | 2.24926                                                                                                                                                                                                                                                                                                                                                                                                                                                                                                                                                                                                                                                                                                                                                                                                                                                                                                                                                                                                                                                                                                                                                                                                                                                                                                                                                                                                                                                                                                                                                                                                                                                                                                                                                                                                                                                                                                                                                                                                                                                                                                                                                                                                                                                                                                                                                                                                                                                                                                                                                                               | -0.43661           | 0.74773  |   |   |   |          |          |         |   |          |          |          |    |         |          |         |    |         |          |          |    |          |         |         |   |          |          |          |   |          |          |          |   |          |          |         |   |          |          |         |    |          |          |         |    |          |         |          |   |          |         |          |   |          |         |          |   |          |         |          |   |          |         |          |   |          |         |          |   |          |         |          |   |         |         |          |   |         |         |         |   |         |         |         |   |         |          |         |   |         |         |          |   |         |          |         |   |         |          |         |   |         |         |          |   |         |         |          |   |         |         |         |   |         |         |         |   |         |         |          |   |         |         |         |   |         |         |         |   |         |         |          |   |         |         |          |                                                                                                                                                                                                                                                                                                                                                                                                                                                                                                                                                                                                                                                                                                                                                                                                                                                                                                                                                                                                                                                                                                                                                                                                                                                                                                                                                                                                                                                                                                                                                                                                                                                                                                                                                                                                                                                                                                                                                                                                                                                                                                                                                                                                                                                    |         |         |         |         |         |         |         |         |          |          |          |          |          |          |          |          |          |          |          |          |          |          |          |          |          |          |          |          |          |          |          |          |          |          |          |          |          |          |          |          |          |          |          |          |          |          |          |           |           |           |           |           |           |           |           |           |           |           |           |           |           |           |           |           |           |           |           |           |           |           |           |           |           |           |           |           |           |           |           |           |           |           |           |           |           |           |           |           |           |           |           |           |           |           |           |           |           |           |           |
| H                 | 1.91482                                                                                                                                                                                                                                                                                                                                                                                                                                                                                                                                                                                                                                                                                                                                                                                                                                                                                                                                                                                                                                                                                                                                                                                                                                                                                                                                                                                                                                                                                                                                                                                                                                                                                                                                                                                                                                                                                                                                                                                                                                                                                                                                                                                                                                                                                                                                                                                                                                                                                                                                                                               | 0.91028            | -0.94021 |   |   |   |          |          |         |   |          |          |          |    |         |          |         |    |         |          |          |    |          |         |         |   |          |          |          |   |          |          |          |   |          |          |         |   |          |          |         |    |          |          |         |    |          |         |          |   |          |         |          |   |          |         |          |   |          |         |          |   |          |         |          |   |          |         |          |   |          |         |          |   |         |         |          |   |         |         |         |   |         |         |         |   |         |          |         |   |         |         |          |   |         |          |         |   |         |          |         |   |         |         |          |   |         |         |          |   |         |         |         |   |         |         |         |   |         |         |          |   |         |         |         |   |         |         |         |   |         |         |          |   |         |         |          |                                                                                                                                                                                                                                                                                                                                                                                                                                                                                                                                                                                                                                                                                                                                                                                                                                                                                                                                                                                                                                                                                                                                                                                                                                                                                                                                                                                                                                                                                                                                                                                                                                                                                                                                                                                                                                                                                                                                                                                                                                                                                                                                                                                                                                                    |         |         |         |         |         |         |         |         |          |          |          |          |          |          |          |          |          |          |          |          |          |          |          |          |          |          |          |          |          |          |          |          |          |          |          |          |          |          |          |          |          |          |          |          |          |          |          |           |           |           |           |           |           |           |           |           |           |           |           |           |           |           |           |           |           |           |           |           |           |           |           |           |           |           |           |           |           |           |           |           |           |           |           |           |           |           |           |           |           |           |           |           |           |           |           |           |           |           |           |
| H                 | 3.06591                                                                                                                                                                                                                                                                                                                                                                                                                                                                                                                                                                                                                                                                                                                                                                                                                                                                                                                                                                                                                                                                                                                                                                                                                                                                                                                                                                                                                                                                                                                                                                                                                                                                                                                                                                                                                                                                                                                                                                                                                                                                                                                                                                                                                                                                                                                                                                                                                                                                                                                                                                               | -1.13763           | 0.56361  |   |   |   |          |          |         |   |          |          |          |    |         |          |         |    |         |          |          |    |          |         |         |   |          |          |          |   |          |          |          |   |          |          |         |   |          |          |         |    |          |          |         |    |          |         |          |   |          |         |          |   |          |         |          |   |          |         |          |   |          |         |          |   |          |         |          |   |          |         |          |   |         |         |          |   |         |         |         |   |         |         |         |   |         |          |         |   |         |         |          |   |         |          |         |   |         |          |         |   |         |         |          |   |         |         |          |   |         |         |         |   |         |         |         |   |         |         |          |   |         |         |         |   |         |         |         |   |         |         |          |   |         |         |          |                                                                                                                                                                                                                                                                                                                                                                                                                                                                                                                                                                                                                                                                                                                                                                                                                                                                                                                                                                                                                                                                                                                                                                                                                                                                                                                                                                                                                                                                                                                                                                                                                                                                                                                                                                                                                                                                                                                                                                                                                                                                                                                                                                                                                                                    |         |         |         |         |         |         |         |         |          |          |          |          |          |          |          |          |          |          |          |          |          |          |          |          |          |          |          |          |          |          |          |          |          |          |          |          |          |          |          |          |          |          |          |          |          |          |          |           |           |           |           |           |           |           |           |           |           |           |           |           |           |           |           |           |           |           |           |           |           |           |           |           |           |           |           |           |           |           |           |           |           |           |           |           |           |           |           |           |           |           |           |           |           |           |           |           |           |           |           |
| H                 | 2.22146                                                                                                                                                                                                                                                                                                                                                                                                                                                                                                                                                                                                                                                                                                                                                                                                                                                                                                                                                                                                                                                                                                                                                                                                                                                                                                                                                                                                                                                                                                                                                                                                                                                                                                                                                                                                                                                                                                                                                                                                                                                                                                                                                                                                                                                                                                                                                                                                                                                                                                                                                                               | -0.23535           | 1.82689  |   |   |   |          |          |         |   |          |          |          |    |         |          |         |    |         |          |          |    |          |         |         |   |          |          |          |   |          |          |          |   |          |          |         |   |          |          |         |    |          |          |         |    |          |         |          |   |          |         |          |   |          |         |          |   |          |         |          |   |          |         |          |   |          |         |          |   |          |         |          |   |         |         |          |   |         |         |         |   |         |         |         |   |         |          |         |   |         |         |          |   |         |          |         |   |         |          |         |   |         |         |          |   |         |         |          |   |         |         |         |   |         |         |         |   |         |         |          |   |         |         |         |   |         |         |         |   |         |         |          |   |         |         |          |                                                                                                                                                                                                                                                                                                                                                                                                                                                                                                                                                                                                                                                                                                                                                                                                                                                                                                                                                                                                                                                                                                                                                                                                                                                                                                                                                                                                                                                                                                                                                                                                                                                                                                                                                                                                                                                                                                                                                                                                                                                                                                                                                                                                                                                    |         |         |         |         |         |         |         |         |          |          |          |          |          |          |          |          |          |          |          |          |          |          |          |          |          |          |          |          |          |          |          |          |          |          |          |          |          |          |          |          |          |          |          |          |          |          |          |           |           |           |           |           |           |           |           |           |           |           |           |           |           |           |           |           |           |           |           |           |           |           |           |           |           |           |           |           |           |           |           |           |           |           |           |           |           |           |           |           |           |           |           |           |           |           |           |           |           |           |           |
| C                 | 4.00352                                                                                                                                                                                                                                                                                                                                                                                                                                                                                                                                                                                                                                                                                                                                                                                                                                                                                                                                                                                                                                                                                                                                                                                                                                                                                                                                                                                                                                                                                                                                                                                                                                                                                                                                                                                                                                                                                                                                                                                                                                                                                                                                                                                                                                                                                                                                                                                                                                                                                                                                                                               | 1.09659            | -0.49602 |   |   |   |          |          |         |   |          |          |          |    |         |          |         |    |         |          |          |    |          |         |         |   |          |          |          |   |          |          |          |   |          |          |         |   |          |          |         |    |          |          |         |    |          |         |          |   |          |         |          |   |          |         |          |   |          |         |          |   |          |         |          |   |          |         |          |   |          |         |          |   |         |         |          |   |         |         |         |   |         |         |         |   |         |          |         |   |         |         |          |   |         |          |         |   |         |          |         |   |         |         |          |   |         |         |          |   |         |         |         |   |         |         |         |   |         |         |          |   |         |         |         |   |         |         |         |   |         |         |          |   |         |         |          |                                                                                                                                                                                                                                                                                                                                                                                                                                                                                                                                                                                                                                                                                                                                                                                                                                                                                                                                                                                                                                                                                                                                                                                                                                                                                                                                                                                                                                                                                                                                                                                                                                                                                                                                                                                                                                                                                                                                                                                                                                                                                                                                                                                                                                                    |         |         |         |         |         |         |         |         |          |          |          |          |          |          |          |          |          |          |          |          |          |          |          |          |          |          |          |          |          |          |          |          |          |          |          |          |          |          |          |          |          |          |          |          |          |          |          |           |           |           |           |           |           |           |           |           |           |           |           |           |           |           |           |           |           |           |           |           |           |           |           |           |           |           |           |           |           |           |           |           |           |           |           |           |           |           |           |           |           |           |           |           |           |           |           |           |           |           |           |
| C                 | 4.02764                                                                                                                                                                                                                                                                                                                                                                                                                                                                                                                                                                                                                                                                                                                                                                                                                                                                                                                                                                                                                                                                                                                                                                                                                                                                                                                                                                                                                                                                                                                                                                                                                                                                                                                                                                                                                                                                                                                                                                                                                                                                                                                                                                                                                                                                                                                                                                                                                                                                                                                                                                               | 2.59364            | -0.83869 |   |   |   |          |          |         |   |          |          |          |    |         |          |         |    |         |          |          |    |          |         |         |   |          |          |          |   |          |          |          |   |          |          |         |   |          |          |         |    |          |          |         |    |          |         |          |   |          |         |          |   |          |         |          |   |          |         |          |   |          |         |          |   |          |         |          |   |          |         |          |   |         |         |          |   |         |         |         |   |         |         |         |   |         |          |         |   |         |         |          |   |         |          |         |   |         |          |         |   |         |         |          |   |         |         |          |   |         |         |         |   |         |         |         |   |         |         |          |   |         |         |         |   |         |         |         |   |         |         |          |   |         |         |          |                                                                                                                                                                                                                                                                                                                                                                                                                                                                                                                                                                                                                                                                                                                                                                                                                                                                                                                                                                                                                                                                                                                                                                                                                                                                                                                                                                                                                                                                                                                                                                                                                                                                                                                                                                                                                                                                                                                                                                                                                                                                                                                                                                                                                                                    |         |         |         |         |         |         |         |         |          |          |          |          |          |          |          |          |          |          |          |          |          |          |          |          |          |          |          |          |          |          |          |          |          |          |          |          |          |          |          |          |          |          |          |          |          |          |          |           |           |           |           |           |           |           |           |           |           |           |           |           |           |           |           |           |           |           |           |           |           |           |           |           |           |           |           |           |           |           |           |           |           |           |           |           |           |           |           |           |           |           |           |           |           |           |           |           |           |           |           |
| C                 | 3.17016                                                                                                                                                                                                                                                                                                                                                                                                                                                                                                                                                                                                                                                                                                                                                                                                                                                                                                                                                                                                                                                                                                                                                                                                                                                                                                                                                                                                                                                                                                                                                                                                                                                                                                                                                                                                                                                                                                                                                                                                                                                                                                                                                                                                                                                                                                                                                                                                                                                                                                                                                                               | 3.21947            | 0.27282  |   |   |   |          |          |         |   |          |          |          |    |         |          |         |    |         |          |          |    |          |         |         |   |          |          |          |   |          |          |          |   |          |          |         |   |          |          |         |    |          |          |         |    |          |         |          |   |          |         |          |   |          |         |          |   |          |         |          |   |          |         |          |   |          |         |          |   |          |         |          |   |         |         |          |   |         |         |         |   |         |         |         |   |         |          |         |   |         |         |          |   |         |          |         |   |         |          |         |   |         |         |          |   |         |         |          |   |         |         |         |   |         |         |         |   |         |         |          |   |         |         |         |   |         |         |         |   |         |         |          |   |         |         |          |                                                                                                                                                                                                                                                                                                                                                                                                                                                                                                                                                                                                                                                                                                                                                                                                                                                                                                                                                                                                                                                                                                                                                                                                                                                                                                                                                                                                                                                                                                                                                                                                                                                                                                                                                                                                                                                                                                                                                                                                                                                                                                                                                                                                                                                    |         |         |         |         |         |         |         |         |          |          |          |          |          |          |          |          |          |          |          |          |          |          |          |          |          |          |          |          |          |          |          |          |          |          |          |          |          |          |          |          |          |          |          |          |          |          |          |           |           |           |           |           |           |           |           |           |           |           |           |           |           |           |           |           |           |           |           |           |           |           |           |           |           |           |           |           |           |           |           |           |           |           |           |           |           |           |           |           |           |           |           |           |           |           |           |           |           |           |           |
| H                 | 0.68657                                                                                                                                                                                                                                                                                                                                                                                                                                                                                                                                                                                                                                                                                                                                                                                                                                                                                                                                                                                                                                                                                                                                                                                                                                                                                                                                                                                                                                                                                                                                                                                                                                                                                                                                                                                                                                                                                                                                                                                                                                                                                                                                                                                                                                                                                                                                                                                                                                                                                                                                                                               | 1.55429            | 1.61439  |   |   |   |          |          |         |   |          |          |          |    |         |          |         |    |         |          |          |    |          |         |         |   |          |          |          |   |          |          |          |   |          |          |         |   |          |          |         |    |          |          |         |    |          |         |          |   |          |         |          |   |          |         |          |   |          |         |          |   |          |         |          |   |          |         |          |   |          |         |          |   |         |         |          |   |         |         |         |   |         |         |         |   |         |          |         |   |         |         |          |   |         |          |         |   |         |          |         |   |         |         |          |   |         |         |          |   |         |         |         |   |         |         |         |   |         |         |          |   |         |         |         |   |         |         |         |   |         |         |          |   |         |         |          |                                                                                                                                                                                                                                                                                                                                                                                                                                                                                                                                                                                                                                                                                                                                                                                                                                                                                                                                                                                                                                                                                                                                                                                                                                                                                                                                                                                                                                                                                                                                                                                                                                                                                                                                                                                                                                                                                                                                                                                                                                                                                                                                                                                                                                                    |         |         |         |         |         |         |         |         |          |          |          |          |          |          |          |          |          |          |          |          |          |          |          |          |          |          |          |          |          |          |          |          |          |          |          |          |          |          |          |          |          |          |          |          |          |          |          |           |           |           |           |           |           |           |           |           |           |           |           |           |           |           |           |           |           |           |           |           |           |           |           |           |           |           |           |           |           |           |           |           |           |           |           |           |           |           |           |           |           |           |           |           |           |           |           |           |           |           |           |
| H                 | 4.26105                                                                                                                                                                                                                                                                                                                                                                                                                                                                                                                                                                                                                                                                                                                                                                                                                                                                                                                                                                                                                                                                                                                                                                                                                                                                                                                                                                                                                                                                                                                                                                                                                                                                                                                                                                                                                                                                                                                                                                                                                                                                                                                                                                                                                                                                                                                                                                                                                                                                                                                                                                               | 0.44686            | -1.33320 |   |   |   |          |          |         |   |          |          |          |    |         |          |         |    |         |          |          |    |          |         |         |   |          |          |          |   |          |          |          |   |          |          |         |   |          |          |         |    |          |          |         |    |          |         |          |   |          |         |          |   |          |         |          |   |          |         |          |   |          |         |          |   |          |         |          |   |          |         |          |   |         |         |          |   |         |         |         |   |         |         |         |   |         |          |         |   |         |         |          |   |         |          |         |   |         |          |         |   |         |         |          |   |         |         |          |   |         |         |         |   |         |         |         |   |         |         |          |   |         |         |         |   |         |         |         |   |         |         |          |   |         |         |          |                                                                                                                                                                                                                                                                                                                                                                                                                                                                                                                                                                                                                                                                                                                                                                                                                                                                                                                                                                                                                                                                                                                                                                                                                                                                                                                                                                                                                                                                                                                                                                                                                                                                                                                                                                                                                                                                                                                                                                                                                                                                                                                                                                                                                                                    |         |         |         |         |         |         |         |         |          |          |          |          |          |          |          |          |          |          |          |          |          |          |          |          |          |          |          |          |          |          |          |          |          |          |          |          |          |          |          |          |          |          |          |          |          |          |          |           |           |           |           |           |           |           |           |           |           |           |           |           |           |           |           |           |           |           |           |           |           |           |           |           |           |           |           |           |           |           |           |           |           |           |           |           |           |           |           |           |           |           |           |           |           |           |           |           |           |           |           |
| H                 | 3.76691                                                                                                                                                                                                                                                                                                                                                                                                                                                                                                                                                                                                                                                                                                                                                                                                                                                                                                                                                                                                                                                                                                                                                                                                                                                                                                                                                                                                                                                                                                                                                                                                                                                                                                                                                                                                                                                                                                                                                                                                                                                                                                                                                                                                                                                                                                                                                                                                                                                                                                                                                                               | 3.43944            | 1.16941  |   |   |   |          |          |         |   |          |          |          |    |         |          |         |    |         |          |          |    |          |         |         |   |          |          |          |   |          |          |          |   |          |          |         |   |          |          |         |    |          |          |         |    |          |         |          |   |          |         |          |   |          |         |          |   |          |         |          |   |          |         |          |   |          |         |          |   |          |         |          |   |         |         |          |   |         |         |         |   |         |         |         |   |         |          |         |   |         |         |          |   |         |          |         |   |         |          |         |   |         |         |          |   |         |         |          |   |         |         |         |   |         |         |         |   |         |         |          |   |         |         |         |   |         |         |         |   |         |         |          |   |         |         |          |                                                                                                                                                                                                                                                                                                                                                                                                                                                                                                                                                                                                                                                                                                                                                                                                                                                                                                                                                                                                                                                                                                                                                                                                                                                                                                                                                                                                                                                                                                                                                                                                                                                                                                                                                                                                                                                                                                                                                                                                                                                                                                                                                                                                                                                    |         |         |         |         |         |         |         |         |          |          |          |          |          |          |          |          |          |          |          |          |          |          |          |          |          |          |          |          |          |          |          |          |          |          |          |          |          |          |          |          |          |          |          |          |          |          |          |           |           |           |           |           |           |           |           |           |           |           |           |           |           |           |           |           |           |           |           |           |           |           |           |           |           |           |           |           |           |           |           |           |           |           |           |           |           |           |           |           |           |           |           |           |           |           |           |           |           |           |           |
| H                 | 2.61678                                                                                                                                                                                                                                                                                                                                                                                                                                                                                                                                                                                                                                                                                                                                                                                                                                                                                                                                                                                                                                                                                                                                                                                                                                                                                                                                                                                                                                                                                                                                                                                                                                                                                                                                                                                                                                                                                                                                                                                                                                                                                                                                                                                                                                                                                                                                                                                                                                                                                                                                                                               | 4.12800            | 0.02082  |   |   |   |          |          |         |   |          |          |          |    |         |          |         |    |         |          |          |    |          |         |         |   |          |          |          |   |          |          |          |   |          |          |         |   |          |          |         |    |          |          |         |    |          |         |          |   |          |         |          |   |          |         |          |   |          |         |          |   |          |         |          |   |          |         |          |   |          |         |          |   |         |         |          |   |         |         |         |   |         |         |         |   |         |          |         |   |         |         |          |   |         |          |         |   |         |          |         |   |         |         |          |   |         |         |          |   |         |         |         |   |         |         |         |   |         |         |          |   |         |         |         |   |         |         |         |   |         |         |          |   |         |         |          |                                                                                                                                                                                                                                                                                                                                                                                                                                                                                                                                                                                                                                                                                                                                                                                                                                                                                                                                                                                                                                                                                                                                                                                                                                                                                                                                                                                                                                                                                                                                                                                                                                                                                                                                                                                                                                                                                                                                                                                                                                                                                                                                                                                                                                                    |         |         |         |         |         |         |         |         |          |          |          |          |          |          |          |          |          |          |          |          |          |          |          |          |          |          |          |          |          |          |          |          |          |          |          |          |          |          |          |          |          |          |          |          |          |          |          |           |           |           |           |           |           |           |           |           |           |           |           |           |           |           |           |           |           |           |           |           |           |           |           |           |           |           |           |           |           |           |           |           |           |           |           |           |           |           |           |           |           |           |           |           |           |           |           |           |           |           |           |
| H                 | 5.03288                                                                                                                                                                                                                                                                                                                                                                                                                                                                                                                                                                                                                                                                                                                                                                                                                                                                                                                                                                                                                                                                                                                                                                                                                                                                                                                                                                                                                                                                                                                                                                                                                                                                                                                                                                                                                                                                                                                                                                                                                                                                                                                                                                                                                                                                                                                                                                                                                                                                                                                                                                               | 3.01458            | -0.87565 |   |   |   |          |          |         |   |          |          |          |    |         |          |         |    |         |          |          |    |          |         |         |   |          |          |          |   |          |          |          |   |          |          |         |   |          |          |         |    |          |          |         |    |          |         |          |   |          |         |          |   |          |         |          |   |          |         |          |   |          |         |          |   |          |         |          |   |          |         |          |   |         |         |          |   |         |         |         |   |         |         |         |   |         |          |         |   |         |         |          |   |         |          |         |   |         |          |         |   |         |         |          |   |         |         |          |   |         |         |         |   |         |         |         |   |         |         |          |   |         |         |         |   |         |         |         |   |         |         |          |   |         |         |          |                                                                                                                                                                                                                                                                                                                                                                                                                                                                                                                                                                                                                                                                                                                                                                                                                                                                                                                                                                                                                                                                                                                                                                                                                                                                                                                                                                                                                                                                                                                                                                                                                                                                                                                                                                                                                                                                                                                                                                                                                                                                                                                                                                                                                                                    |         |         |         |         |         |         |         |         |          |          |          |          |          |          |          |          |          |          |          |          |          |          |          |          |          |          |          |          |          |          |          |          |          |          |          |          |          |          |          |          |          |          |          |          |          |          |          |           |           |           |           |           |           |           |           |           |           |           |           |           |           |           |           |           |           |           |           |           |           |           |           |           |           |           |           |           |           |           |           |           |           |           |           |           |           |           |           |           |           |           |           |           |           |           |           |           |           |           |           |
| H                 | 3.55204                                                                                                                                                                                                                                                                                                                                                                                                                                                                                                                                                                                                                                                                                                                                                                                                                                                                                                                                                                                                                                                                                                                                                                                                                                                                                                                                                                                                                                                                                                                                                                                                                                                                                                                                                                                                                                                                                                                                                                                                                                                                                                                                                                                                                                                                                                                                                                                                                                                                                                                                                                               | 2.76350            | -1.80911 |   |   |   |          |          |         |   |          |          |          |    |         |          |         |    |         |          |          |    |          |         |         |   |          |          |          |   |          |          |          |   |          |          |         |   |          |          |         |    |          |          |         |    |          |         |          |   |          |         |          |   |          |         |          |   |          |         |          |   |          |         |          |   |          |         |          |   |          |         |          |   |         |         |          |   |         |         |         |   |         |         |         |   |         |          |         |   |         |         |          |   |         |          |         |   |         |          |         |   |         |         |          |   |         |         |          |   |         |         |         |   |         |         |         |   |         |         |          |   |         |         |         |   |         |         |         |   |         |         |          |   |         |         |          |                                                                                                                                                                                                                                                                                                                                                                                                                                                                                                                                                                                                                                                                                                                                                                                                                                                                                                                                                                                                                                                                                                                                                                                                                                                                                                                                                                                                                                                                                                                                                                                                                                                                                                                                                                                                                                                                                                                                                                                                                                                                                                                                                                                                                                                    |         |         |         |         |         |         |         |         |          |          |          |          |          |          |          |          |          |          |          |          |          |          |          |          |          |          |          |          |          |          |          |          |          |          |          |          |          |          |          |          |          |          |          |          |          |          |          |           |           |           |           |           |           |           |           |           |           |           |           |           |           |           |           |           |           |           |           |           |           |           |           |           |           |           |           |           |           |           |           |           |           |           |           |           |           |           |           |           |           |           |           |           |           |           |           |           |           |           |           |
| 30.5138           | 40.4902                                                                                                                                                                                                                                                                                                                                                                                                                                                                                                                                                                                                                                                                                                                                                                                                                                                                                                                                                                                                                                                                                                                                                                                                                                                                                                                                                                                                                                                                                                                                                                                                                                                                                                                                                                                                                                                                                                                                                                                                                                                                                                                                                                                                                                                                                                                                                                                                                                                                                                                                                                               | 49.2117            |          |   |   |   |          |          |         |   |          |          |          |    |         |          |         |    |         |          |          |    |          |         |         |   |          |          |          |   |          |          |          |   |          |          |         |   |          |          |         |    |          |          |         |    |          |         |          |   |          |         |          |   |          |         |          |   |          |         |          |   |          |         |          |   |          |         |          |   |          |         |          |   |         |         |          |   |         |         |         |   |         |         |         |   |         |          |         |   |         |         |          |   |         |          |         |   |         |          |         |   |         |         |          |   |         |         |          |   |         |         |         |   |         |         |         |   |         |         |          |   |         |         |         |   |         |         |         |   |         |         |          |   |         |         |          |                                                                                                                                                                                                                                                                                                                                                                                                                                                                                                                                                                                                                                                                                                                                                                                                                                                                                                                                                                                                                                                                                                                                                                                                                                                                                                                                                                                                                                                                                                                                                                                                                                                                                                                                                                                                                                                                                                                                                                                                                                                                                                                                                                                                                                                    |         |         |         |         |         |         |         |         |          |          |          |          |          |          |          |          |          |          |          |          |          |          |          |          |          |          |          |          |          |          |          |          |          |          |          |          |          |          |          |          |          |          |          |          |          |          |          |           |           |           |           |           |           |           |           |           |           |           |           |           |           |           |           |           |           |           |           |           |           |           |           |           |           |           |           |           |           |           |           |           |           |           |           |           |           |           |           |           |           |           |           |           |           |           |           |           |           |           |           |
| 58.3919           | 62.3528                                                                                                                                                                                                                                                                                                                                                                                                                                                                                                                                                                                                                                                                                                                                                                                                                                                                                                                                                                                                                                                                                                                                                                                                                                                                                                                                                                                                                                                                                                                                                                                                                                                                                                                                                                                                                                                                                                                                                                                                                                                                                                                                                                                                                                                                                                                                                                                                                                                                                                                                                                               | 75.0709            |          |   |   |   |          |          |         |   |          |          |          |    |         |          |         |    |         |          |          |    |          |         |         |   |          |          |          |   |          |          |          |   |          |          |         |   |          |          |         |    |          |          |         |    |          |         |          |   |          |         |          |   |          |         |          |   |          |         |          |   |          |         |          |   |          |         |          |   |          |         |          |   |         |         |          |   |         |         |         |   |         |         |         |   |         |          |         |   |         |         |          |   |         |          |         |   |         |          |         |   |         |         |          |   |         |         |          |   |         |         |         |   |         |         |         |   |         |         |          |   |         |         |         |   |         |         |         |   |         |         |          |   |         |         |          |                                                                                                                                                                                                                                                                                                                                                                                                                                                                                                                                                                                                                                                                                                                                                                                                                                                                                                                                                                                                                                                                                                                                                                                                                                                                                                                                                                                                                                                                                                                                                                                                                                                                                                                                                                                                                                                                                                                                                                                                                                                                                                                                                                                                                                                    |         |         |         |         |         |         |         |         |          |          |          |          |          |          |          |          |          |          |          |          |          |          |          |          |          |          |          |          |          |          |          |          |          |          |          |          |          |          |          |          |          |          |          |          |          |          |          |           |           |           |           |           |           |           |           |           |           |           |           |           |           |           |           |           |           |           |           |           |           |           |           |           |           |           |           |           |           |           |           |           |           |           |           |           |           |           |           |           |           |           |           |           |           |           |           |           |           |           |           |
| 79.1747           | 97.3333                                                                                                                                                                                                                                                                                                                                                                                                                                                                                                                                                                                                                                                                                                                                                                                                                                                                                                                                                                                                                                                                                                                                                                                                                                                                                                                                                                                                                                                                                                                                                                                                                                                                                                                                                                                                                                                                                                                                                                                                                                                                                                                                                                                                                                                                                                                                                                                                                                                                                                                                                                               | 113.8269           |          |   |   |   |          |          |         |   |          |          |          |    |         |          |         |    |         |          |          |    |          |         |         |   |          |          |          |   |          |          |          |   |          |          |         |   |          |          |         |    |          |          |         |    |          |         |          |   |          |         |          |   |          |         |          |   |          |         |          |   |          |         |          |   |          |         |          |   |          |         |          |   |         |         |          |   |         |         |         |   |         |         |         |   |         |          |         |   |         |         |          |   |         |          |         |   |         |          |         |   |         |         |          |   |         |         |          |   |         |         |         |   |         |         |         |   |         |         |          |   |         |         |         |   |         |         |         |   |         |         |          |   |         |         |          |                                                                                                                                                                                                                                                                                                                                                                                                                                                                                                                                                                                                                                                                                                                                                                                                                                                                                                                                                                                                                                                                                                                                                                                                                                                                                                                                                                                                                                                                                                                                                                                                                                                                                                                                                                                                                                                                                                                                                                                                                                                                                                                                                                                                                                                    |         |         |         |         |         |         |         |         |          |          |          |          |          |          |          |          |          |          |          |          |          |          |          |          |          |          |          |          |          |          |          |          |          |          |          |          |          |          |          |          |          |          |          |          |          |          |          |           |           |           |           |           |           |           |           |           |           |           |           |           |           |           |           |           |           |           |           |           |           |           |           |           |           |           |           |           |           |           |           |           |           |           |           |           |           |           |           |           |           |           |           |           |           |           |           |           |           |           |           |
| 120.7758          | 139.0774                                                                                                                                                                                                                                                                                                                                                                                                                                                                                                                                                                                                                                                                                                                                                                                                                                                                                                                                                                                                                                                                                                                                                                                                                                                                                                                                                                                                                                                                                                                                                                                                                                                                                                                                                                                                                                                                                                                                                                                                                                                                                                                                                                                                                                                                                                                                                                                                                                                                                                                                                                              | 152.9466           |          |   |   |   |          |          |         |   |          |          |          |    |         |          |         |    |         |          |          |    |          |         |         |   |          |          |          |   |          |          |          |   |          |          |         |   |          |          |         |    |          |          |         |    |          |         |          |   |          |         |          |   |          |         |          |   |          |         |          |   |          |         |          |   |          |         |          |   |          |         |          |   |         |         |          |   |         |         |         |   |         |         |         |   |         |          |         |   |         |         |          |   |         |          |         |   |         |          |         |   |         |         |          |   |         |         |          |   |         |         |         |   |         |         |         |   |         |         |          |   |         |         |         |   |         |         |         |   |         |         |          |   |         |         |          |                                                                                                                                                                                                                                                                                                                                                                                                                                                                                                                                                                                                                                                                                                                                                                                                                                                                                                                                                                                                                                                                                                                                                                                                                                                                                                                                                                                                                                                                                                                                                                                                                                                                                                                                                                                                                                                                                                                                                                                                                                                                                                                                                                                                                                                    |         |         |         |         |         |         |         |         |          |          |          |          |          |          |          |          |          |          |          |          |          |          |          |          |          |          |          |          |          |          |          |          |          |          |          |          |          |          |          |          |          |          |          |          |          |          |          |           |           |           |           |           |           |           |           |           |           |           |           |           |           |           |           |           |           |           |           |           |           |           |           |           |           |           |           |           |           |           |           |           |           |           |           |           |           |           |           |           |           |           |           |           |           |           |           |           |           |           |           |
| 158.0680          | 168.4735                                                                                                                                                                                                                                                                                                                                                                                                                                                                                                                                                                                                                                                                                                                                                                                                                                                                                                                                                                                                                                                                                                                                                                                                                                                                                                                                                                                                                                                                                                                                                                                                                                                                                                                                                                                                                                                                                                                                                                                                                                                                                                                                                                                                                                                                                                                                                                                                                                                                                                                                                                              | 176.2207           |          |   |   |   |          |          |         |   |          |          |          |    |         |          |         |    |         |          |          |    |          |         |         |   |          |          |          |   |          |          |          |   |          |          |         |   |          |          |         |    |          |          |         |    |          |         |          |   |          |         |          |   |          |         |          |   |          |         |          |   |          |         |          |   |          |         |          |   |          |         |          |   |         |         |          |   |         |         |         |   |         |         |         |   |         |          |         |   |         |         |          |   |         |          |         |   |         |          |         |   |         |         |          |   |         |         |          |   |         |         |         |   |         |         |         |   |         |         |          |   |         |         |         |   |         |         |         |   |         |         |          |   |         |         |          |                                                                                                                                                                                                                                                                                                                                                                                                                                                                                                                                                                                                                                                                                                                                                                                                                                                                                                                                                                                                                                                                                                                                                                                                                                                                                                                                                                                                                                                                                                                                                                                                                                                                                                                                                                                                                                                                                                                                                                                                                                                                                                                                                                                                                                                    |         |         |         |         |         |         |         |         |          |          |          |          |          |          |          |          |          |          |          |          |          |          |          |          |          |          |          |          |          |          |          |          |          |          |          |          |          |          |          |          |          |          |          |          |          |          |          |           |           |           |           |           |           |           |           |           |           |           |           |           |           |           |           |           |           |           |           |           |           |           |           |           |           |           |           |           |           |           |           |           |           |           |           |           |           |           |           |           |           |           |           |           |           |           |           |           |           |           |           |
| 188.8974          | 195.7003                                                                                                                                                                                                                                                                                                                                                                                                                                                                                                                                                                                                                                                                                                                                                                                                                                                                                                                                                                                                                                                                                                                                                                                                                                                                                                                                                                                                                                                                                                                                                                                                                                                                                                                                                                                                                                                                                                                                                                                                                                                                                                                                                                                                                                                                                                                                                                                                                                                                                                                                                                              | 196.8103           |          |   |   |   |          |          |         |   |          |          |          |    |         |          |         |    |         |          |          |    |          |         |         |   |          |          |          |   |          |          |          |   |          |          |         |   |          |          |         |    |          |          |         |    |          |         |          |   |          |         |          |   |          |         |          |   |          |         |          |   |          |         |          |   |          |         |          |   |          |         |          |   |         |         |          |   |         |         |         |   |         |         |         |   |         |          |         |   |         |         |          |   |         |          |         |   |         |          |         |   |         |         |          |   |         |         |          |   |         |         |         |   |         |         |         |   |         |         |          |   |         |         |         |   |         |         |         |   |         |         |          |   |         |         |          |                                                                                                                                                                                                                                                                                                                                                                                                                                                                                                                                                                                                                                                                                                                                                                                                                                                                                                                                                                                                                                                                                                                                                                                                                                                                                                                                                                                                                                                                                                                                                                                                                                                                                                                                                                                                                                                                                                                                                                                                                                                                                                                                                                                                                                                    |         |         |         |         |         |         |         |         |          |          |          |          |          |          |          |          |          |          |          |          |          |          |          |          |          |          |          |          |          |          |          |          |          |          |          |          |          |          |          |          |          |          |          |          |          |          |          |           |           |           |           |           |           |           |           |           |           |           |           |           |           |           |           |           |           |           |           |           |           |           |           |           |           |           |           |           |           |           |           |           |           |           |           |           |           |           |           |           |           |           |           |           |           |           |           |           |           |           |           |
| 211.3972          | 218.2958                                                                                                                                                                                                                                                                                                                                                                                                                                                                                                                                                                                                                                                                                                                                                                                                                                                                                                                                                                                                                                                                                                                                                                                                                                                                                                                                                                                                                                                                                                                                                                                                                                                                                                                                                                                                                                                                                                                                                                                                                                                                                                                                                                                                                                                                                                                                                                                                                                                                                                                                                                              | 220.9511           |          |   |   |   |          |          |         |   |          |          |          |    |         |          |         |    |         |          |          |    |          |         |         |   |          |          |          |   |          |          |          |   |          |          |         |   |          |          |         |    |          |          |         |    |          |         |          |   |          |         |          |   |          |         |          |   |          |         |          |   |          |         |          |   |          |         |          |   |          |         |          |   |         |         |          |   |         |         |         |   |         |         |         |   |         |          |         |   |         |         |          |   |         |          |         |   |         |          |         |   |         |         |          |   |         |         |          |   |         |         |         |   |         |         |         |   |         |         |          |   |         |         |         |   |         |         |         |   |         |         |          |   |         |         |          |                                                                                                                                                                                                                                                                                                                                                                                                                                                                                                                                                                                                                                                                                                                                                                                                                                                                                                                                                                                                                                                                                                                                                                                                                                                                                                                                                                                                                                                                                                                                                                                                                                                                                                                                                                                                                                                                                                                                                                                                                                                                                                                                                                                                                                                    |         |         |         |         |         |         |         |         |          |          |          |          |          |          |          |          |          |          |          |          |          |          |          |          |          |          |          |          |          |          |          |          |          |          |          |          |          |          |          |          |          |          |          |          |          |          |          |           |           |           |           |           |           |           |           |           |           |           |           |           |           |           |           |           |           |           |           |           |           |           |           |           |           |           |           |           |           |           |           |           |           |           |           |           |           |           |           |           |           |           |           |           |           |           |           |           |           |           |           |
| 238.6298          | 247.4184                                                                                                                                                                                                                                                                                                                                                                                                                                                                                                                                                                                                                                                                                                                                                                                                                                                                                                                                                                                                                                                                                                                                                                                                                                                                                                                                                                                                                                                                                                                                                                                                                                                                                                                                                                                                                                                                                                                                                                                                                                                                                                                                                                                                                                                                                                                                                                                                                                                                                                                                                                              | 292.4182           |          |   |   |   |          |          |         |   |          |          |          |    |         |          |         |    |         |          |          |    |          |         |         |   |          |          |          |   |          |          |          |   |          |          |         |   |          |          |         |    |          |          |         |    |          |         |          |   |          |         |          |   |          |         |          |   |          |         |          |   |          |         |          |   |          |         |          |   |          |         |          |   |         |         |          |   |         |         |         |   |         |         |         |   |         |          |         |   |         |         |          |   |         |          |         |   |         |          |         |   |         |         |          |   |         |         |          |   |         |         |         |   |         |         |         |   |         |         |          |   |         |         |         |   |         |         |         |   |         |         |          |   |         |         |          |                                                                                                                                                                                                                                                                                                                                                                                                                                                                                                                                                                                                                                                                                                                                                                                                                                                                                                                                                                                                                                                                                                                                                                                                                                                                                                                                                                                                                                                                                                                                                                                                                                                                                                                                                                                                                                                                                                                                                                                                                                                                                                                                                                                                                                                    |         |         |         |         |         |         |         |         |          |          |          |          |          |          |          |          |          |          |          |          |          |          |          |          |          |          |          |          |          |          |          |          |          |          |          |          |          |          |          |          |          |          |          |          |          |          |          |           |           |           |           |           |           |           |           |           |           |           |           |           |           |           |           |           |           |           |           |           |           |           |           |           |           |           |           |           |           |           |           |           |           |           |           |           |           |           |           |           |           |           |           |           |           |           |           |           |           |           |           |
| 300.1103          | 322.3272                                                                                                                                                                                                                                                                                                                                                                                                                                                                                                                                                                                                                                                                                                                                                                                                                                                                                                                                                                                                                                                                                                                                                                                                                                                                                                                                                                                                                                                                                                                                                                                                                                                                                                                                                                                                                                                                                                                                                                                                                                                                                                                                                                                                                                                                                                                                                                                                                                                                                                                                                                              | 324.8378           |          |   |   |   |          |          |         |   |          |          |          |    |         |          |         |    |         |          |          |    |          |         |         |   |          |          |          |   |          |          |          |   |          |          |         |   |          |          |         |    |          |          |         |    |          |         |          |   |          |         |          |   |          |         |          |   |          |         |          |   |          |         |          |   |          |         |          |   |          |         |          |   |         |         |          |   |         |         |         |   |         |         |         |   |         |          |         |   |         |         |          |   |         |          |         |   |         |          |         |   |         |         |          |   |         |         |          |   |         |         |         |   |         |         |         |   |         |         |          |   |         |         |         |   |         |         |         |   |         |         |          |   |         |         |          |                                                                                                                                                                                                                                                                                                                                                                                                                                                                                                                                                                                                                                                                                                                                                                                                                                                                                                                                                                                                                                                                                                                                                                                                                                                                                                                                                                                                                                                                                                                                                                                                                                                                                                                                                                                                                                                                                                                                                                                                                                                                                                                                                                                                                                                    |         |         |         |         |         |         |         |         |          |          |          |          |          |          |          |          |          |          |          |          |          |          |          |          |          |          |          |          |          |          |          |          |          |          |          |          |          |          |          |          |          |          |          |          |          |          |          |           |           |           |           |           |           |           |           |           |           |           |           |           |           |           |           |           |           |           |           |           |           |           |           |           |           |           |           |           |           |           |           |           |           |           |           |           |           |           |           |           |           |           |           |           |           |           |           |           |           |           |           |
| 332.5202          | 333.3439                                                                                                                                                                                                                                                                                                                                                                                                                                                                                                                                                                                                                                                                                                                                                                                                                                                                                                                                                                                                                                                                                                                                                                                                                                                                                                                                                                                                                                                                                                                                                                                                                                                                                                                                                                                                                                                                                                                                                                                                                                                                                                                                                                                                                                                                                                                                                                                                                                                                                                                                                                              | 351.3476           |          |   |   |   |          |          |         |   |          |          |          |    |         |          |         |    |         |          |          |    |          |         |         |   |          |          |          |   |          |          |          |   |          |          |         |   |          |          |         |    |          |          |         |    |          |         |          |   |          |         |          |   |          |         |          |   |          |         |          |   |          |         |          |   |          |         |          |   |          |         |          |   |         |         |          |   |         |         |         |   |         |         |         |   |         |          |         |   |         |         |          |   |         |          |         |   |         |          |         |   |         |         |          |   |         |         |          |   |         |         |         |   |         |         |         |   |         |         |          |   |         |         |         |   |         |         |         |   |         |         |          |   |         |         |          |                                                                                                                                                                                                                                                                                                                                                                                                                                                                                                                                                                                                                                                                                                                                                                                                                                                                                                                                                                                                                                                                                                                                                                                                                                                                                                                                                                                                                                                                                                                                                                                                                                                                                                                                                                                                                                                                                                                                                                                                                                                                                                                                                                                                                                                    |         |         |         |         |         |         |         |         |          |          |          |          |          |          |          |          |          |          |          |          |          |          |          |          |          |          |          |          |          |          |          |          |          |          |          |          |          |          |          |          |          |          |          |          |          |          |          |           |           |           |           |           |           |           |           |           |           |           |           |           |           |           |           |           |           |           |           |           |           |           |           |           |           |           |           |           |           |           |           |           |           |           |           |           |           |           |           |           |           |           |           |           |           |           |           |           |           |           |           |
| 380.9674          | 456.6758                                                                                                                                                                                                                                                                                                                                                                                                                                                                                                                                                                                                                                                                                                                                                                                                                                                                                                                                                                                                                                                                                                                                                                                                                                                                                                                                                                                                                                                                                                                                                                                                                                                                                                                                                                                                                                                                                                                                                                                                                                                                                                                                                                                                                                                                                                                                                                                                                                                                                                                                                                              | 471.4587           |          |   |   |   |          |          |         |   |          |          |          |    |         |          |         |    |         |          |          |    |          |         |         |   |          |          |          |   |          |          |          |   |          |          |         |   |          |          |         |    |          |          |         |    |          |         |          |   |          |         |          |   |          |         |          |   |          |         |          |   |          |         |          |   |          |         |          |   |          |         |          |   |         |         |          |   |         |         |         |   |         |         |         |   |         |          |         |   |         |         |          |   |         |          |         |   |         |          |         |   |         |         |          |   |         |         |          |   |         |         |         |   |         |         |         |   |         |         |          |   |         |         |         |   |         |         |         |   |         |         |          |   |         |         |          |                                                                                                                                                                                                                                                                                                                                                                                                                                                                                                                                                                                                                                                                                                                                                                                                                                                                                                                                                                                                                                                                                                                                                                                                                                                                                                                                                                                                                                                                                                                                                                                                                                                                                                                                                                                                                                                                                                                                                                                                                                                                                                                                                                                                                                                    |         |         |         |         |         |         |         |         |          |          |          |          |          |          |          |          |          |          |          |          |          |          |          |          |          |          |          |          |          |          |          |          |          |          |          |          |          |          |          |          |          |          |          |          |          |          |          |           |           |           |           |           |           |           |           |           |           |           |           |           |           |           |           |           |           |           |           |           |           |           |           |           |           |           |           |           |           |           |           |           |           |           |           |           |           |           |           |           |           |           |           |           |           |           |           |           |           |           |           |
| 530.7060          | 547.5189                                                                                                                                                                                                                                                                                                                                                                                                                                                                                                                                                                                                                                                                                                                                                                                                                                                                                                                                                                                                                                                                                                                                                                                                                                                                                                                                                                                                                                                                                                                                                                                                                                                                                                                                                                                                                                                                                                                                                                                                                                                                                                                                                                                                                                                                                                                                                                                                                                                                                                                                                                              | 573.2550           |          |   |   |   |          |          |         |   |          |          |          |    |         |          |         |    |         |          |          |    |          |         |         |   |          |          |          |   |          |          |          |   |          |          |         |   |          |          |         |    |          |          |         |    |          |         |          |   |          |         |          |   |          |         |          |   |          |         |          |   |          |         |          |   |          |         |          |   |          |         |          |   |         |         |          |   |         |         |         |   |         |         |         |   |         |          |         |   |         |         |          |   |         |          |         |   |         |          |         |   |         |         |          |   |         |         |          |   |         |         |         |   |         |         |         |   |         |         |          |   |         |         |         |   |         |         |         |   |         |         |          |   |         |         |          |                                                                                                                                                                                                                                                                                                                                                                                                                                                                                                                                                                                                                                                                                                                                                                                                                                                                                                                                                                                                                                                                                                                                                                                                                                                                                                                                                                                                                                                                                                                                                                                                                                                                                                                                                                                                                                                                                                                                                                                                                                                                                                                                                                                                                                                    |         |         |         |         |         |         |         |         |          |          |          |          |          |          |          |          |          |          |          |          |          |          |          |          |          |          |          |          |          |          |          |          |          |          |          |          |          |          |          |          |          |          |          |          |          |          |          |           |           |           |           |           |           |           |           |           |           |           |           |           |           |           |           |           |           |           |           |           |           |           |           |           |           |           |           |           |           |           |           |           |           |           |           |           |           |           |           |           |           |           |           |           |           |           |           |           |           |           |           |
| 617.2714          | 661.2115                                                                                                                                                                                                                                                                                                                                                                                                                                                                                                                                                                                                                                                                                                                                                                                                                                                                                                                                                                                                                                                                                                                                                                                                                                                                                                                                                                                                                                                                                                                                                                                                                                                                                                                                                                                                                                                                                                                                                                                                                                                                                                                                                                                                                                                                                                                                                                                                                                                                                                                                                                              | 731.9460           |          |   |   |   |          |          |         |   |          |          |          |    |         |          |         |    |         |          |          |    |          |         |         |   |          |          |          |   |          |          |          |   |          |          |         |   |          |          |         |    |          |          |         |    |          |         |          |   |          |         |          |   |          |         |          |   |          |         |          |   |          |         |          |   |          |         |          |   |          |         |          |   |         |         |          |   |         |         |         |   |         |         |         |   |         |          |         |   |         |         |          |   |         |          |         |   |         |          |         |   |         |         |          |   |         |         |          |   |         |         |         |   |         |         |         |   |         |         |          |   |         |         |         |   |         |         |         |   |         |         |          |   |         |         |          |                                                                                                                                                                                                                                                                                                                                                                                                                                                                                                                                                                                                                                                                                                                                                                                                                                                                                                                                                                                                                                                                                                                                                                                                                                                                                                                                                                                                                                                                                                                                                                                                                                                                                                                                                                                                                                                                                                                                                                                                                                                                                                                                                                                                                                                    |         |         |         |         |         |         |         |         |          |          |          |          |          |          |          |          |          |          |          |          |          |          |          |          |          |          |          |          |          |          |          |          |          |          |          |          |          |          |          |          |          |          |          |          |          |          |          |           |           |           |           |           |           |           |           |           |           |           |           |           |           |           |           |           |           |           |           |           |           |           |           |           |           |           |           |           |           |           |           |           |           |           |           |           |           |           |           |           |           |           |           |           |           |           |           |           |           |           |           |
| 797.6596          | 817.1980                                                                                                                                                                                                                                                                                                                                                                                                                                                                                                                                                                                                                                                                                                                                                                                                                                                                                                                                                                                                                                                                                                                                                                                                                                                                                                                                                                                                                                                                                                                                                                                                                                                                                                                                                                                                                                                                                                                                                                                                                                                                                                                                                                                                                                                                                                                                                                                                                                                                                                                                                                              | 858.5664           |          |   |   |   |          |          |         |   |          |          |          |    |         |          |         |    |         |          |          |    |          |         |         |   |          |          |          |   |          |          |          |   |          |          |         |   |          |          |         |    |          |          |         |    |          |         |          |   |          |         |          |   |          |         |          |   |          |         |          |   |          |         |          |   |          |         |          |   |          |         |          |   |         |         |          |   |         |         |         |   |         |         |         |   |         |          |         |   |         |         |          |   |         |          |         |   |         |          |         |   |         |         |          |   |         |         |          |   |         |         |         |   |         |         |         |   |         |         |          |   |         |         |         |   |         |         |         |   |         |         |          |   |         |         |          |                                                                                                                                                                                                                                                                                                                                                                                                                                                                                                                                                                                                                                                                                                                                                                                                                                                                                                                                                                                                                                                                                                                                                                                                                                                                                                                                                                                                                                                                                                                                                                                                                                                                                                                                                                                                                                                                                                                                                                                                                                                                                                                                                                                                                                                    |         |         |         |         |         |         |         |         |          |          |          |          |          |          |          |          |          |          |          |          |          |          |          |          |          |          |          |          |          |          |          |          |          |          |          |          |          |          |          |          |          |          |          |          |          |          |          |           |           |           |           |           |           |           |           |           |           |           |           |           |           |           |           |           |           |           |           |           |           |           |           |           |           |           |           |           |           |           |           |           |           |           |           |           |           |           |           |           |           |           |           |           |           |           |           |           |           |           |           |
| 867.7341          | 903.5284                                                                                                                                                                                                                                                                                                                                                                                                                                                                                                                                                                                                                                                                                                                                                                                                                                                                                                                                                                                                                                                                                                                                                                                                                                                                                                                                                                                                                                                                                                                                                                                                                                                                                                                                                                                                                                                                                                                                                                                                                                                                                                                                                                                                                                                                                                                                                                                                                                                                                                                                                                              | 931.9373           |          |   |   |   |          |          |         |   |          |          |          |    |         |          |         |    |         |          |          |    |          |         |         |   |          |          |          |   |          |          |          |   |          |          |         |   |          |          |         |    |          |          |         |    |          |         |          |   |          |         |          |   |          |         |          |   |          |         |          |   |          |         |          |   |          |         |          |   |          |         |          |   |         |         |          |   |         |         |         |   |         |         |         |   |         |          |         |   |         |         |          |   |         |          |         |   |         |          |         |   |         |         |          |   |         |         |          |   |         |         |         |   |         |         |         |   |         |         |          |   |         |         |         |   |         |         |         |   |         |         |          |   |         |         |          |                                                                                                                                                                                                                                                                                                                                                                                                                                                                                                                                                                                                                                                                                                                                                                                                                                                                                                                                                                                                                                                                                                                                                                                                                                                                                                                                                                                                                                                                                                                                                                                                                                                                                                                                                                                                                                                                                                                                                                                                                                                                                                                                                                                                                                                    |         |         |         |         |         |         |         |         |          |          |          |          |          |          |          |          |          |          |          |          |          |          |          |          |          |          |          |          |          |          |          |          |          |          |          |          |          |          |          |          |          |          |          |          |          |          |          |           |           |           |           |           |           |           |           |           |           |           |           |           |           |           |           |           |           |           |           |           |           |           |           |           |           |           |           |           |           |           |           |           |           |           |           |           |           |           |           |           |           |           |           |           |           |           |           |           |           |           |           |
| 947.1486          | 995.3016                                                                                                                                                                                                                                                                                                                                                                                                                                                                                                                                                                                                                                                                                                                                                                                                                                                                                                                                                                                                                                                                                                                                                                                                                                                                                                                                                                                                                                                                                                                                                                                                                                                                                                                                                                                                                                                                                                                                                                                                                                                                                                                                                                                                                                                                                                                                                                                                                                                                                                                                                                              | 1007.7174          |          |   |   |   |          |          |         |   |          |          |          |    |         |          |         |    |         |          |          |    |          |         |         |   |          |          |          |   |          |          |          |   |          |          |         |   |          |          |         |    |          |          |         |    |          |         |          |   |          |         |          |   |          |         |          |   |          |         |          |   |          |         |          |   |          |         |          |   |          |         |          |   |         |         |          |   |         |         |         |   |         |         |         |   |         |          |         |   |         |         |          |   |         |          |         |   |         |          |         |   |         |         |          |   |         |         |          |   |         |         |         |   |         |         |         |   |         |         |          |   |         |         |         |   |         |         |         |   |         |         |          |   |         |         |          |                                                                                                                                                                                                                                                                                                                                                                                                                                                                                                                                                                                                                                                                                                                                                                                                                                                                                                                                                                                                                                                                                                                                                                                                                                                                                                                                                                                                                                                                                                                                                                                                                                                                                                                                                                                                                                                                                                                                                                                                                                                                                                                                                                                                                                                    |         |         |         |         |         |         |         |         |          |          |          |          |          |          |          |          |          |          |          |          |          |          |          |          |          |          |          |          |          |          |          |          |          |          |          |          |          |          |          |          |          |          |          |          |          |          |          |           |           |           |           |           |           |           |           |           |           |           |           |           |           |           |           |           |           |           |           |           |           |           |           |           |           |           |           |           |           |           |           |           |           |           |           |           |           |           |           |           |           |           |           |           |           |           |           |           |           |           |           |
| 1027.2569         | 1036.1191                                                                                                                                                                                                                                                                                                                                                                                                                                                                                                                                                                                                                                                                                                                                                                                                                                                                                                                                                                                                                                                                                                                                                                                                                                                                                                                                                                                                                                                                                                                                                                                                                                                                                                                                                                                                                                                                                                                                                                                                                                                                                                                                                                                                                                                                                                                                                                                                                                                                                                                                                                             | 1050.6399          |          |   |   |   |          |          |         |   |          |          |          |    |         |          |         |    |         |          |          |    |          |         |         |   |          |          |          |   |          |          |          |   |          |          |         |   |          |          |         |    |          |          |         |    |          |         |          |   |          |         |          |   |          |         |          |   |          |         |          |   |          |         |          |   |          |         |          |   |          |         |          |   |         |         |          |   |         |         |         |   |         |         |         |   |         |          |         |   |         |         |          |   |         |          |         |   |         |          |         |   |         |         |          |   |         |         |          |   |         |         |         |   |         |         |         |   |         |         |          |   |         |         |         |   |         |         |         |   |         |         |          |   |         |         |          |                                                                                                                                                                                                                                                                                                                                                                                                                                                                                                                                                                                                                                                                                                                                                                                                                                                                                                                                                                                                                                                                                                                                                                                                                                                                                                                                                                                                                                                                                                                                                                                                                                                                                                                                                                                                                                                                                                                                                                                                                                                                                                                                                                                                                                                    |         |         |         |         |         |         |         |         |          |          |          |          |          |          |          |          |          |          |          |          |          |          |          |          |          |          |          |          |          |          |          |          |          |          |          |          |          |          |          |          |          |          |          |          |          |          |          |           |           |           |           |           |           |           |           |           |           |           |           |           |           |           |           |           |           |           |           |           |           |           |           |           |           |           |           |           |           |           |           |           |           |           |           |           |           |           |           |           |           |           |           |           |           |           |           |           |           |           |           |
| 1052.7481         | 1057.4788                                                                                                                                                                                                                                                                                                                                                                                                                                                                                                                                                                                                                                                                                                                                                                                                                                                                                                                                                                                                                                                                                                                                                                                                                                                                                                                                                                                                                                                                                                                                                                                                                                                                                                                                                                                                                                                                                                                                                                                                                                                                                                                                                                                                                                                                                                                                                                                                                                                                                                                                                                             | 1064.8115          |          |   |   |   |          |          |         |   |          |          |          |    |         |          |         |    |         |          |          |    |          |         |         |   |          |          |          |   |          |          |          |   |          |          |         |   |          |          |         |    |          |          |         |    |          |         |          |   |          |         |          |   |          |         |          |   |          |         |          |   |          |         |          |   |          |         |          |   |          |         |          |   |         |         |          |   |         |         |         |   |         |         |         |   |         |          |         |   |         |         |          |   |         |          |         |   |         |          |         |   |         |         |          |   |         |         |          |   |         |         |         |   |         |         |         |   |         |         |          |   |         |         |         |   |         |         |         |   |         |         |          |   |         |         |          |                                                                                                                                                                                                                                                                                                                                                                                                                                                                                                                                                                                                                                                                                                                                                                                                                                                                                                                                                                                                                                                                                                                                                                                                                                                                                                                                                                                                                                                                                                                                                                                                                                                                                                                                                                                                                                                                                                                                                                                                                                                                                                                                                                                                                                                    |         |         |         |         |         |         |         |         |          |          |          |          |          |          |          |          |          |          |          |          |          |          |          |          |          |          |          |          |          |          |          |          |          |          |          |          |          |          |          |          |          |          |          |          |          |          |          |           |           |           |           |           |           |           |           |           |           |           |           |           |           |           |           |           |           |           |           |           |           |           |           |           |           |           |           |           |           |           |           |           |           |           |           |           |           |           |           |           |           |           |           |           |           |           |           |           |           |           |           |
| 1069.6756         | 1099.6001                                                                                                                                                                                                                                                                                                                                                                                                                                                                                                                                                                                                                                                                                                                                                                                                                                                                                                                                                                                                                                                                                                                                                                                                                                                                                                                                                                                                                                                                                                                                                                                                                                                                                                                                                                                                                                                                                                                                                                                                                                                                                                                                                                                                                                                                                                                                                                                                                                                                                                                                                                             | 1130.6411          |          |   |   |   |          |          |         |   |          |          |          |    |         |          |         |    |         |          |          |    |          |         |         |   |          |          |          |   |          |          |          |   |          |          |         |   |          |          |         |    |          |          |         |    |          |         |          |   |          |         |          |   |          |         |          |   |          |         |          |   |          |         |          |   |          |         |          |   |          |         |          |   |         |         |          |   |         |         |         |   |         |         |         |   |         |          |         |   |         |         |          |   |         |          |         |   |         |          |         |   |         |         |          |   |         |         |          |   |         |         |         |   |         |         |         |   |         |         |          |   |         |         |         |   |         |         |         |   |         |         |          |   |         |         |          |                                                                                                                                                                                                                                                                                                                                                                                                                                                                                                                                                                                                                                                                                                                                                                                                                                                                                                                                                                                                                                                                                                                                                                                                                                                                                                                                                                                                                                                                                                                                                                                                                                                                                                                                                                                                                                                                                                                                                                                                                                                                                                                                                                                                                                                    |         |         |         |         |         |         |         |         |          |          |          |          |          |          |          |          |          |          |          |          |          |          |          |          |          |          |          |          |          |          |          |          |          |          |          |          |          |          |          |          |          |          |          |          |          |          |          |           |           |           |           |           |           |           |           |           |           |           |           |           |           |           |           |           |           |           |           |           |           |           |           |           |           |           |           |           |           |           |           |           |           |           |           |           |           |           |           |           |           |           |           |           |           |           |           |           |           |           |           |
| 1167.9056         | 1189.8788                                                                                                                                                                                                                                                                                                                                                                                                                                                                                                                                                                                                                                                                                                                                                                                                                                                                                                                                                                                                                                                                                                                                                                                                                                                                                                                                                                                                                                                                                                                                                                                                                                                                                                                                                                                                                                                                                                                                                                                                                                                                                                                                                                                                                                                                                                                                                                                                                                                                                                                                                                             | 1207.3459          |          |   |   |   |          |          |         |   |          |          |          |    |         |          |         |    |         |          |          |    |          |         |         |   |          |          |          |   |          |          |          |   |          |          |         |   |          |          |         |    |          |          |         |    |          |         |          |   |          |         |          |   |          |         |          |   |          |         |          |   |          |         |          |   |          |         |          |   |          |         |          |   |         |         |          |   |         |         |         |   |         |         |         |   |         |          |         |   |         |         |          |   |         |          |         |   |         |          |         |   |         |         |          |   |         |         |          |   |         |         |         |   |         |         |         |   |         |         |          |   |         |         |         |   |         |         |         |   |         |         |          |   |         |         |          |                                                                                                                                                                                                                                                                                                                                                                                                                                                                                                                                                                                                                                                                                                                                                                                                                                                                                                                                                                                                                                                                                                                                                                                                                                                                                                                                                                                                                                                                                                                                                                                                                                                                                                                                                                                                                                                                                                                                                                                                                                                                                                                                                                                                                                                    |         |         |         |         |         |         |         |         |          |          |          |          |          |          |          |          |          |          |          |          |          |          |          |          |          |          |          |          |          |          |          |          |          |          |          |          |          |          |          |          |          |          |          |          |          |          |          |           |           |           |           |           |           |           |           |           |           |           |           |           |           |           |           |           |           |           |           |           |           |           |           |           |           |           |           |           |           |           |           |           |           |           |           |           |           |           |           |           |           |           |           |           |           |           |           |           |           |           |           |
| 1215.5036         | 1224.8320                                                                                                                                                                                                                                                                                                                                                                                                                                                                                                                                                                                                                                                                                                                                                                                                                                                                                                                                                                                                                                                                                                                                                                                                                                                                                                                                                                                                                                                                                                                                                                                                                                                                                                                                                                                                                                                                                                                                                                                                                                                                                                                                                                                                                                                                                                                                                                                                                                                                                                                                                                             | 1249.0547          |          |   |   |   |          |          |         |   |          |          |          |    |         |          |         |    |         |          |          |    |          |         |         |   |          |          |          |   |          |          |          |   |          |          |         |   |          |          |         |    |          |          |         |    |          |         |          |   |          |         |          |   |          |         |          |   |          |         |          |   |          |         |          |   |          |         |          |   |          |         |          |   |         |         |          |   |         |         |         |   |         |         |         |   |         |          |         |   |         |         |          |   |         |          |         |   |         |          |         |   |         |         |          |   |         |         |          |   |         |         |         |   |         |         |         |   |         |         |          |   |         |         |         |   |         |         |         |   |         |         |          |   |         |         |          |                                                                                                                                                                                                                                                                                                                                                                                                                                                                                                                                                                                                                                                                                                                                                                                                                                                                                                                                                                                                                                                                                                                                                                                                                                                                                                                                                                                                                                                                                                                                                                                                                                                                                                                                                                                                                                                                                                                                                                                                                                                                                                                                                                                                                                                    |         |         |         |         |         |         |         |         |          |          |          |          |          |          |          |          |          |          |          |          |          |          |          |          |          |          |          |          |          |          |          |          |          |          |          |          |          |          |          |          |          |          |          |          |          |          |          |           |           |           |           |           |           |           |           |           |           |           |           |           |           |           |           |           |           |           |           |           |           |           |           |           |           |           |           |           |           |           |           |           |           |           |           |           |           |           |           |           |           |           |           |           |           |           |           |           |           |           |           |
| 1252.9884         | 1278.0648                                                                                                                                                                                                                                                                                                                                                                                                                                                                                                                                                                                                                                                                                                                                                                                                                                                                                                                                                                                                                                                                                                                                                                                                                                                                                                                                                                                                                                                                                                                                                                                                                                                                                                                                                                                                                                                                                                                                                                                                                                                                                                                                                                                                                                                                                                                                                                                                                                                                                                                                                                             | 1318.8309          |          |   |   |   |          |          |         |   |          |          |          |    |         |          |         |    |         |          |          |    |          |         |         |   |          |          |          |   |          |          |          |   |          |          |         |   |          |          |         |    |          |          |         |    |          |         |          |   |          |         |          |   |          |         |          |   |          |         |          |   |          |         |          |   |          |         |          |   |          |         |          |   |         |         |          |   |         |         |         |   |         |         |         |   |         |          |         |   |         |         |          |   |         |          |         |   |         |          |         |   |         |         |          |   |         |         |          |   |         |         |         |   |         |         |         |   |         |         |          |   |         |         |         |   |         |         |         |   |         |         |          |   |         |         |          |                                                                                                                                                                                                                                                                                                                                                                                                                                                                                                                                                                                                                                                                                                                                                                                                                                                                                                                                                                                                                                                                                                                                                                                                                                                                                                                                                                                                                                                                                                                                                                                                                                                                                                                                                                                                                                                                                                                                                                                                                                                                                                                                                                                                                                                    |         |         |         |         |         |         |         |         |          |          |          |          |          |          |          |          |          |          |          |          |          |          |          |          |          |          |          |          |          |          |          |          |          |          |          |          |          |          |          |          |          |          |          |          |          |          |          |           |           |           |           |           |           |           |           |           |           |           |           |           |           |           |           |           |           |           |           |           |           |           |           |           |           |           |           |           |           |           |           |           |           |           |           |           |           |           |           |           |           |           |           |           |           |           |           |           |           |           |           |
| 1324.1149         | 1337.0359                                                                                                                                                                                                                                                                                                                                                                                                                                                                                                                                                                                                                                                                                                                                                                                                                                                                                                                                                                                                                                                                                                                                                                                                                                                                                                                                                                                                                                                                                                                                                                                                                                                                                                                                                                                                                                                                                                                                                                                                                                                                                                                                                                                                                                                                                                                                                                                                                                                                                                                                                                             | 1353.5014          |          |   |   |   |          |          |         |   |          |          |          |    |         |          |         |    |         |          |          |    |          |         |         |   |          |          |          |   |          |          |          |   |          |          |         |   |          |          |         |    |          |          |         |    |          |         |          |   |          |         |          |   |          |         |          |   |          |         |          |   |          |         |          |   |          |         |          |   |          |         |          |   |         |         |          |   |         |         |         |   |         |         |         |   |         |          |         |   |         |         |          |   |         |          |         |   |         |          |         |   |         |         |          |   |         |         |          |   |         |         |         |   |         |         |         |   |         |         |          |   |         |         |         |   |         |         |         |   |         |         |          |   |         |         |          |                                                                                                                                                                                                                                                                                                                                                                                                                                                                                                                                                                                                                                                                                                                                                                                                                                                                                                                                                                                                                                                                                                                                                                                                                                                                                                                                                                                                                                                                                                                                                                                                                                                                                                                                                                                                                                                                                                                                                                                                                                                                                                                                                                                                                                                    |         |         |         |         |         |         |         |         |          |          |          |          |          |          |          |          |          |          |          |          |          |          |          |          |          |          |          |          |          |          |          |          |          |          |          |          |          |          |          |          |          |          |          |          |          |          |          |           |           |           |           |           |           |           |           |           |           |           |           |           |           |           |           |           |           |           |           |           |           |           |           |           |           |           |           |           |           |           |           |           |           |           |           |           |           |           |           |           |           |           |           |           |           |           |           |           |           |           |           |
| 1354.6805         | 1371.9930                                                                                                                                                                                                                                                                                                                                                                                                                                                                                                                                                                                                                                                                                                                                                                                                                                                                                                                                                                                                                                                                                                                                                                                                                                                                                                                                                                                                                                                                                                                                                                                                                                                                                                                                                                                                                                                                                                                                                                                                                                                                                                                                                                                                                                                                                                                                                                                                                                                                                                                                                                             | 1430.9479          |          |   |   |   |          |          |         |   |          |          |          |    |         |          |         |    |         |          |          |    |          |         |         |   |          |          |          |   |          |          |          |   |          |          |         |   |          |          |         |    |          |          |         |    |          |         |          |   |          |         |          |   |          |         |          |   |          |         |          |   |          |         |          |   |          |         |          |   |          |         |          |   |         |         |          |   |         |         |         |   |         |         |         |   |         |          |         |   |         |         |          |   |         |          |         |   |         |          |         |   |         |         |          |   |         |         |          |   |         |         |         |   |         |         |         |   |         |         |          |   |         |         |         |   |         |         |         |   |         |         |          |   |         |         |          |                                                                                                                                                                                                                                                                                                                                                                                                                                                                                                                                                                                                                                                                                                                                                                                                                                                                                                                                                                                                                                                                                                                                                                                                                                                                                                                                                                                                                                                                                                                                                                                                                                                                                                                                                                                                                                                                                                                                                                                                                                                                                                                                                                                                                                                    |         |         |         |         |         |         |         |         |          |          |          |          |          |          |          |          |          |          |          |          |          |          |          |          |          |          |          |          |          |          |          |          |          |          |          |          |          |          |          |          |          |          |          |          |          |          |          |           |           |           |           |           |           |           |           |           |           |           |           |           |           |           |           |           |           |           |           |           |           |           |           |           |           |           |           |           |           |           |           |           |           |           |           |           |           |           |           |           |           |           |           |           |           |           |           |           |           |           |           |
| 1456.4726         | 1460.6209                                                                                                                                                                                                                                                                                                                                                                                                                                                                                                                                                                                                                                                                                                                                                                                                                                                                                                                                                                                                                                                                                                                                                                                                                                                                                                                                                                                                                                                                                                                                                                                                                                                                                                                                                                                                                                                                                                                                                                                                                                                                                                                                                                                                                                                                                                                                                                                                                                                                                                                                                                             | 1471.9521          |          |   |   |   |          |          |         |   |          |          |          |    |         |          |         |    |         |          |          |    |          |         |         |   |          |          |          |   |          |          |          |   |          |          |         |   |          |          |         |    |          |          |         |    |          |         |          |   |          |         |          |   |          |         |          |   |          |         |          |   |          |         |          |   |          |         |          |   |          |         |          |   |         |         |          |   |         |         |         |   |         |         |         |   |         |          |         |   |         |         |          |   |         |          |         |   |         |          |         |   |         |         |          |   |         |         |          |   |         |         |         |   |         |         |         |   |         |         |          |   |         |         |         |   |         |         |         |   |         |         |          |   |         |         |          |                                                                                                                                                                                                                                                                                                                                                                                                                                                                                                                                                                                                                                                                                                                                                                                                                                                                                                                                                                                                                                                                                                                                                                                                                                                                                                                                                                                                                                                                                                                                                                                                                                                                                                                                                                                                                                                                                                                                                                                                                                                                                                                                                                                                                                                    |         |         |         |         |         |         |         |         |          |          |          |          |          |          |          |          |          |          |          |          |          |          |          |          |          |          |          |          |          |          |          |          |          |          |          |          |          |          |          |          |          |          |          |          |          |          |          |           |           |           |           |           |           |           |           |           |           |           |           |           |           |           |           |           |           |           |           |           |           |           |           |           |           |           |           |           |           |           |           |           |           |           |           |           |           |           |           |           |           |           |           |           |           |           |           |           |           |           |           |
| 1486.1913         | 1509.5231                                                                                                                                                                                                                                                                                                                                                                                                                                                                                                                                                                                                                                                                                                                                                                                                                                                                                                                                                                                                                                                                                                                                                                                                                                                                                                                                                                                                                                                                                                                                                                                                                                                                                                                                                                                                                                                                                                                                                                                                                                                                                                                                                                                                                                                                                                                                                                                                                                                                                                                                                                             | 1521.7252          |          |   |   |   |          |          |         |   |          |          |          |    |         |          |         |    |         |          |          |    |          |         |         |   |          |          |          |   |          |          |          |   |          |          |         |   |          |          |         |    |          |          |         |    |          |         |          |   |          |         |          |   |          |         |          |   |          |         |          |   |          |         |          |   |          |         |          |   |          |         |          |   |         |         |          |   |         |         |         |   |         |         |         |   |         |          |         |   |         |         |          |   |         |          |         |   |         |          |         |   |         |         |          |   |         |         |          |   |         |         |         |   |         |         |         |   |         |         |          |   |         |         |         |   |         |         |         |   |         |         |          |   |         |         |          |                                                                                                                                                                                                                                                                                                                                                                                                                                                                                                                                                                                                                                                                                                                                                                                                                                                                                                                                                                                                                                                                                                                                                                                                                                                                                                                                                                                                                                                                                                                                                                                                                                                                                                                                                                                                                                                                                                                                                                                                                                                                                                                                                                                                                                                    |         |         |         |         |         |         |         |         |          |          |          |          |          |          |          |          |          |          |          |          |          |          |          |          |          |          |          |          |          |          |          |          |          |          |          |          |          |          |          |          |          |          |          |          |          |          |          |           |           |           |           |           |           |           |           |           |           |           |           |           |           |           |           |           |           |           |           |           |           |           |           |           |           |           |           |           |           |           |           |           |           |           |           |           |           |           |           |           |           |           |           |           |           |           |           |           |           |           |           |
| 1644.4346         | 1656.7480                                                                                                                                                                                                                                                                                                                                                                                                                                                                                                                                                                                                                                                                                                                                                                                                                                                                                                                                                                                                                                                                                                                                                                                                                                                                                                                                                                                                                                                                                                                                                                                                                                                                                                                                                                                                                                                                                                                                                                                                                                                                                                                                                                                                                                                                                                                                                                                                                                                                                                                                                                             | 1712.9293          |          |   |   |   |          |          |         |   |          |          |          |    |         |          |         |    |         |          |          |    |          |         |         |   |          |          |          |   |          |          |          |   |          |          |         |   |          |          |         |    |          |          |         |    |          |         |          |   |          |         |          |   |          |         |          |   |          |         |          |   |          |         |          |   |          |         |          |   |          |         |          |   |         |         |          |   |         |         |         |   |         |         |         |   |         |          |         |   |         |         |          |   |         |          |         |   |         |          |         |   |         |         |          |   |         |         |          |   |         |         |         |   |         |         |         |   |         |         |          |   |         |         |         |   |         |         |         |   |         |         |          |   |         |         |          |                                                                                                                                                                                                                                                                                                                                                                                                                                                                                                                                                                                                                                                                                                                                                                                                                                                                                                                                                                                                                                                                                                                                                                                                                                                                                                                                                                                                                                                                                                                                                                                                                                                                                                                                                                                                                                                                                                                                                                                                                                                                                                                                                                                                                                                    |         |         |         |         |         |         |         |         |          |          |          |          |          |          |          |          |          |          |          |          |          |          |          |          |          |          |          |          |          |          |          |          |          |          |          |          |          |          |          |          |          |          |          |          |          |          |          |           |           |           |           |           |           |           |           |           |           |           |           |           |           |           |           |           |           |           |           |           |           |           |           |           |           |           |           |           |           |           |           |           |           |           |           |           |           |           |           |           |           |           |           |           |           |           |           |           |           |           |           |
| 2910.2164         | 2999.3910                                                                                                                                                                                                                                                                                                                                                                                                                                                                                                                                                                                                                                                                                                                                                                                                                                                                                                                                                                                                                                                                                                                                                                                                                                                                                                                                                                                                                                                                                                                                                                                                                                                                                                                                                                                                                                                                                                                                                                                                                                                                                                                                                                                                                                                                                                                                                                                                                                                                                                                                                                             | 3058.3524          |          |   |   |   |          |          |         |   |          |          |          |    |         |          |         |    |         |          |          |    |          |         |         |   |          |          |          |   |          |          |          |   |          |          |         |   |          |          |         |    |          |          |         |    |          |         |          |   |          |         |          |   |          |         |          |   |          |         |          |   |          |         |          |   |          |         |          |   |          |         |          |   |         |         |          |   |         |         |         |   |         |         |         |   |         |          |         |   |         |         |          |   |         |          |         |   |         |          |         |   |         |         |          |   |         |         |          |   |         |         |         |   |         |         |         |   |         |         |          |   |         |         |         |   |         |         |         |   |         |         |          |   |         |         |          |                                                                                                                                                                                                                                                                                                                                                                                                                                                                                                                                                                                                                                                                                                                                                                                                                                                                                                                                                                                                                                                                                                                                                                                                                                                                                                                                                                                                                                                                                                                                                                                                                                                                                                                                                                                                                                                                                                                                                                                                                                                                                                                                                                                                                                                    |         |         |         |         |         |         |         |         |          |          |          |          |          |          |          |          |          |          |          |          |          |          |          |          |          |          |          |          |          |          |          |          |          |          |          |          |          |          |          |          |          |          |          |          |          |          |          |           |           |           |           |           |           |           |           |           |           |           |           |           |           |           |           |           |           |           |           |           |           |           |           |           |           |           |           |           |           |           |           |           |           |           |           |           |           |           |           |           |           |           |           |           |           |           |           |           |           |           |           |
| 3068.8336         | 3081.8845                                                                                                                                                                                                                                                                                                                                                                                                                                                                                                                                                                                                                                                                                                                                                                                                                                                                                                                                                                                                                                                                                                                                                                                                                                                                                                                                                                                                                                                                                                                                                                                                                                                                                                                                                                                                                                                                                                                                                                                                                                                                                                                                                                                                                                                                                                                                                                                                                                                                                                                                                                             | 3108.6605          |          |   |   |   |          |          |         |   |          |          |          |    |         |          |         |    |         |          |          |    |          |         |         |   |          |          |          |   |          |          |          |   |          |          |         |   |          |          |         |    |          |          |         |    |          |         |          |   |          |         |          |   |          |         |          |   |          |         |          |   |          |         |          |   |          |         |          |   |          |         |          |   |         |         |          |   |         |         |         |   |         |         |         |   |         |          |         |   |         |         |          |   |         |          |         |   |         |          |         |   |         |         |          |   |         |         |          |   |         |         |         |   |         |         |         |   |         |         |          |   |         |         |         |   |         |         |         |   |         |         |          |   |         |         |          |                                                                                                                                                                                                                                                                                                                                                                                                                                                                                                                                                                                                                                                                                                                                                                                                                                                                                                                                                                                                                                                                                                                                                                                                                                                                                                                                                                                                                                                                                                                                                                                                                                                                                                                                                                                                                                                                                                                                                                                                                                                                                                                                                                                                                                                    |         |         |         |         |         |         |         |         |          |          |          |          |          |          |          |          |          |          |          |          |          |          |          |          |          |          |          |          |          |          |          |          |          |          |          |          |          |          |          |          |          |          |          |          |          |          |          |           |           |           |           |           |           |           |           |           |           |           |           |           |           |           |           |           |           |           |           |           |           |           |           |           |           |           |           |           |           |           |           |           |           |           |           |           |           |           |           |           |           |           |           |           |           |           |           |           |           |           |           |
| 3149.4686         | 3149.7221                                                                                                                                                                                                                                                                                                                                                                                                                                                                                                                                                                                                                                                                                                                                                                                                                                                                                                                                                                                                                                                                                                                                                                                                                                                                                                                                                                                                                                                                                                                                                                                                                                                                                                                                                                                                                                                                                                                                                                                                                                                                                                                                                                                                                                                                                                                                                                                                                                                                                                                                                                             | 3166.7957          |          |   |   |   |          |          |         |   |          |          |          |    |         |          |         |    |         |          |          |    |          |         |         |   |          |          |          |   |          |          |          |   |          |          |         |   |          |          |         |    |          |          |         |    |          |         |          |   |          |         |          |   |          |         |          |   |          |         |          |   |          |         |          |   |          |         |          |   |          |         |          |   |         |         |          |   |         |         |         |   |         |         |         |   |         |          |         |   |         |         |          |   |         |          |         |   |         |          |         |   |         |         |          |   |         |         |          |   |         |         |         |   |         |         |         |   |         |         |          |   |         |         |         |   |         |         |         |   |         |         |          |   |         |         |          |                                                                                                                                                                                                                                                                                                                                                                                                                                                                                                                                                                                                                                                                                                                                                                                                                                                                                                                                                                                                                                                                                                                                                                                                                                                                                                                                                                                                                                                                                                                                                                                                                                                                                                                                                                                                                                                                                                                                                                                                                                                                                                                                                                                                                                                    |         |         |         |         |         |         |         |         |          |          |          |          |          |          |          |          |          |          |          |          |          |          |          |          |          |          |          |          |          |          |          |          |          |          |          |          |          |          |          |          |          |          |          |          |          |          |          |           |           |           |           |           |           |           |           |           |           |           |           |           |           |           |           |           |           |           |           |           |           |           |           |           |           |           |           |           |           |           |           |           |           |           |           |           |           |           |           |           |           |           |           |           |           |           |           |           |           |           |           |
| 3169.0846         | 3172.5006                                                                                                                                                                                                                                                                                                                                                                                                                                                                                                                                                                                                                                                                                                                                                                                                                                                                                                                                                                                                                                                                                                                                                                                                                                                                                                                                                                                                                                                                                                                                                                                                                                                                                                                                                                                                                                                                                                                                                                                                                                                                                                                                                                                                                                                                                                                                                                                                                                                                                                                                                                             | 3174.2848          |          |   |   |   |          |          |         |   |          |          |          |    |         |          |         |    |         |          |          |    |          |         |         |   |          |          |          |   |          |          |          |   |          |          |         |   |          |          |         |    |          |          |         |    |          |         |          |   |          |         |          |   |          |         |          |   |          |         |          |   |          |         |          |   |          |         |          |   |          |         |          |   |         |         |          |   |         |         |         |   |         |         |         |   |         |          |         |   |         |         |          |   |         |          |         |   |         |          |         |   |         |         |          |   |         |         |          |   |         |         |         |   |         |         |         |   |         |         |          |   |         |         |         |   |         |         |         |   |         |         |          |   |         |         |          |                                                                                                                                                                                                                                                                                                                                                                                                                                                                                                                                                                                                                                                                                                                                                                                                                                                                                                                                                                                                                                                                                                                                                                                                                                                                                                                                                                                                                                                                                                                                                                                                                                                                                                                                                                                                                                                                                                                                                                                                                                                                                                                                                                                                                                                    |         |         |         |         |         |         |         |         |          |          |          |          |          |          |          |          |          |          |          |          |          |          |          |          |          |          |          |          |          |          |          |          |          |          |          |          |          |          |          |          |          |          |          |          |          |          |          |           |           |           |           |           |           |           |           |           |           |           |           |           |           |           |           |           |           |           |           |           |           |           |           |           |           |           |           |           |           |           |           |           |           |           |           |           |           |           |           |           |           |           |           |           |           |           |           |           |           |           |           |
| 3181.8310         | 3192.4767                                                                                                                                                                                                                                                                                                                                                                                                                                                                                                                                                                                                                                                                                                                                                                                                                                                                                                                                                                                                                                                                                                                                                                                                                                                                                                                                                                                                                                                                                                                                                                                                                                                                                                                                                                                                                                                                                                                                                                                                                                                                                                                                                                                                                                                                                                                                                                                                                                                                                                                                                                             | 3262.5704          |          |   |   |   |          |          |         |   |          |          |          |    |         |          |         |    |         |          |          |    |          |         |         |   |          |          |          |   |          |          |          |   |          |          |         |   |          |          |         |    |          |          |         |    |          |         |          |   |          |         |          |   |          |         |          |   |          |         |          |   |          |         |          |   |          |         |          |   |          |         |          |   |         |         |          |   |         |         |         |   |         |         |         |   |         |          |         |   |         |         |          |   |         |          |         |   |         |          |         |   |         |         |          |   |         |         |          |   |         |         |         |   |         |         |         |   |         |         |          |   |         |         |         |   |         |         |         |   |         |         |          |   |         |         |          |                                                                                                                                                                                                                                                                                                                                                                                                                                                                                                                                                                                                                                                                                                                                                                                                                                                                                                                                                                                                                                                                                                                                                                                                                                                                                                                                                                                                                                                                                                                                                                                                                                                                                                                                                                                                                                                                                                                                                                                                                                                                                                                                                                                                                                                    |         |         |         |         |         |         |         |         |          |          |          |          |          |          |          |          |          |          |          |          |          |          |          |          |          |          |          |          |          |          |          |          |          |          |          |          |          |          |          |          |          |          |          |          |          |          |          |           |           |           |           |           |           |           |           |           |           |           |           |           |           |           |           |           |           |           |           |           |           |           |           |           |           |           |           |           |           |           |           |           |           |           |           |           |           |           |           |           |           |           |           |           |           |           |           |           |           |           |           |
| 3278.7822         | 3281.9627                                                                                                                                                                                                                                                                                                                                                                                                                                                                                                                                                                                                                                                                                                                                                                                                                                                                                                                                                                                                                                                                                                                                                                                                                                                                                                                                                                                                                                                                                                                                                                                                                                                                                                                                                                                                                                                                                                                                                                                                                                                                                                                                                                                                                                                                                                                                                                                                                                                                                                                                                                             | 3301.8380          |          |   |   |   |          |          |         |   |          |          |          |    |         |          |         |    |         |          |          |    |          |         |         |   |          |          |          |   |          |          |          |   |          |          |         |   |          |          |         |    |          |          |         |    |          |         |          |   |          |         |          |   |          |         |          |   |          |         |          |   |          |         |          |   |          |         |          |   |          |         |          |   |         |         |          |   |         |         |         |   |         |         |         |   |         |          |         |   |         |         |          |   |         |          |         |   |         |          |         |   |         |         |          |   |         |         |          |   |         |         |         |   |         |         |         |   |         |         |          |   |         |         |         |   |         |         |         |   |         |         |          |   |         |         |          |                                                                                                                                                                                                                                                                                                                                                                                                                                                                                                                                                                                                                                                                                                                                                                                                                                                                                                                                                                                                                                                                                                                                                                                                                                                                                                                                                                                                                                                                                                                                                                                                                                                                                                                                                                                                                                                                                                                                                                                                                                                                                                                                                                                                                                                    |         |         |         |         |         |         |         |         |          |          |          |          |          |          |          |          |          |          |          |          |          |          |          |          |          |          |          |          |          |          |          |          |          |          |          |          |          |          |          |          |          |          |          |          |          |          |          |           |           |           |           |           |           |           |           |           |           |           |           |           |           |           |           |           |           |           |           |           |           |           |           |           |           |           |           |           |           |           |           |           |           |           |           |           |           |           |           |           |           |           |           |           |           |           |           |           |           |           |           |

|    |          |         |          |
|----|----------|---------|----------|
| H  | 4.68967  | 0.87481 | 0.32997  |
| Ni | -2.13363 | 1.04428 | -0.02177 |

**Statistical Thermodynamic Analysis**

Temperature=298.15 K

Pressure=1 atm

Zero-point correction= 0.269028

Electronic Energy = -2595.98673467

Internal Energy (E)= -2595.69401167

Enthalpy (H)= -2595.69306767

Gibbs Free Energy (G)=-2595.77295767

Gibbs Free Energy of Solvation=-2595.79277785

| St.Pt.                              | General Structure                                                                 | Ball & Stick model                                                                 |          |           |           |           |
|-------------------------------------|-----------------------------------------------------------------------------------|------------------------------------------------------------------------------------|----------|-----------|-----------|-----------|
| 1NiTS <sub>3</sub>                  | 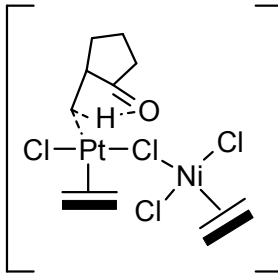 |  |          |           |           |           |
| <b><u>Cartesian co-ordinate</u></b> |                                                                                   | <b><u>Frequencies</u></b>                                                          |          |           |           |           |
| -----<br>Atoms                      | X                                                                                 | Y                                                                                  | Z        | -----     | -----     | -----     |
| -----                               | -----                                                                             | -----                                                                              | -----    | -----     | -----     | -----     |
| C                                   | 2.65334                                                                           | -1.90351                                                                           | -0.88392 | -780.5474 | 23.8356   | 32.6669   |
| C                                   | 3.07351                                                                           | -0.81752                                                                           | -1.60070 | 39.9932   | 49.1575   | 56.6206   |
| Pt                                  | 1.50196                                                                           | -0.05873                                                                           | -0.05767 | 67.0920   | 81.5697   | 99.9037   |
| Cl                                  | 3.22144                                                                           | 0.32682                                                                            | 1.45509  | 102.6383  | 110.9863  | 121.4291  |
| Cl                                  | -0.28824                                                                          | -0.49105                                                                           | -1.63850 | 138.0546  | 149.3029  | 154.5038  |
| H                                   | 2.61904                                                                           | -0.57115                                                                           | -2.55605 | 172.7040  | 174.7137  | 180.2167  |
| H                                   | 3.95676                                                                           | -0.26000                                                                           | -1.30551 | 195.7807  | 210.6746  | 214.4877  |
| H                                   | 3.19590                                                                           | -2.22865                                                                           | -0.00103 | 242.7774  | 258.3626  | 270.1510  |
| H                                   | 1.85181                                                                           | -2.54082                                                                           | -1.24409 | 285.6368  | 299.8668  | 309.0387  |
| Cl                                  | -0.19989                                                                          | -2.59328                                                                           | 0.86100  | 314.7887  | 324.9993  | 352.1206  |
| Cl                                  | -3.44116                                                                          | -0.17447                                                                           | -1.03806 | 375.6512  | 381.3956  | 442.7018  |
| H                                   | -2.77901                                                                          | -3.73875                                                                           | 0.71311  | 473.6369  | 559.4194  | 576.0608  |
| C                                   | -3.35967                                                                          | -2.82172                                                                           | 0.68100  | 579.4557  | 601.6817  | 612.7359  |
| C                                   | -3.16849                                                                          | -1.85172                                                                           | 1.60637  | 739.7741  | 812.9670  | 831.6428  |
| H                                   | -4.13290                                                                          | -2.71951                                                                           | -0.07423 | 859.7526  | 862.8601  | 883.1619  |
| H                                   | -3.79092                                                                          | -0.96238                                                                           | 1.60743  | 929.9762  | 937.8132  | 970.1425  |
| H                                   | -2.43468                                                                          | -1.97955                                                                           | 2.39628  | 1020.8926 | 1034.2886 | 1051.2191 |
| C                                   | -0.91488                                                                          | 1.96996                                                                            | 0.52776  | 1053.2698 | 1059.5017 | 1060.1742 |
| O                                   | 0.74462                                                                           | 3.05490                                                                            | -0.81538 | 1064.9462 | 1067.0392 | 1101.7482 |
| C                                   | -0.37930                                                                          | 3.07663                                                                            | -0.35586 | 1146.3660 | 1184.6611 | 1199.5054 |
| C                                   | 0.22278                                                                           | 1.19622                                                                            | 1.15490  | 1200.7173 | 1220.4578 | 1232.6913 |
| H                                   | 0.81600                                                                           | 1.80124                                                                            | 1.84446  | 1238.3788 | 1253.0763 | 1309.9628 |
| H                                   | -0.12105                                                                          | 0.30193                                                                            | 1.68881  | 1321.9880 | 1332.0007 | 1345.7053 |
| C                                   | -1.39782                                                                          | 4.19343                                                                            | -0.45017 | 1355.4849 | 1372.1772 | 1408.8785 |
| H                                   | -0.92050                                                                          | 5.10288                                                                            | -0.06868 | 1454.7689 | 1469.0808 | 1471.6343 |
| C                                   | -2.55282                                                                          | 3.71466                                                                            | 0.44778  | 1472.4921 | 1502.5048 | 1517.1495 |
| H                                   | -3.06063                                                                          | 4.53688                                                                            | 0.95402  | 1610.2989 | 1628.4327 | 1656.3004 |
| H                                   | -3.29269                                                                          | 3.17631                                                                            | -0.15251 | 1884.8815 | 3070.9092 | 3083.9121 |
| C                                   | -1.89821                                                                          | 2.72276                                                                            | 1.43261  | 3089.4130 | 3090.5559 | 3099.3696 |
| H                                   | -1.35780                                                                          | 3.25621                                                                            | 2.22424  | 3151.2236 | 3151.3693 | 3170.6336 |
| H                                   | -2.62616                                                                          | 2.05691                                                                            | 1.90132  | 3174.0629 | 3181.4904 | 3186.5532 |
| H                                   | -1.67230                                                                          | 4.38270                                                                            | -1.49068 | 3190.0217 | 3197.2097 | 3278.6610 |
| H                                   | -1.51747                                                                          | 1.33242                                                                            | -0.13547 | 3289.5916 | 3295.3718 | 3307.3045 |
| H                                   | 1.16219                                                                           | 1.53292                                                                            | -0.04116 |           |           |           |

|                                                  |          |          |                                               |  |
|--------------------------------------------------|----------|----------|-----------------------------------------------|--|
| Ni                                               | -1.80865 | -1.40604 | -0.15961                                      |  |
| <b><u>Statistical Thermodynamic Analysis</u></b> |          |          |                                               |  |
| Temperature=298.15 K                             |          |          | Pressure=1 atm                                |  |
| Zero-point correction= 0.263755                  |          |          | Electronic Energy = -2595.96098646            |  |
| Internal Energy (E)= -2595.67335646              |          |          | Enthalpy (H)= -2595.67241246                  |  |
| Gibbs Free Energy (G)=-2595.75366946             |          |          | Gibbs Free Energy of Solvation=-2595.76973814 |  |

| St.Pt.           | General Structure                                                                                                                                                                                                                                                                                                                                                                                                                                                                                                                                                                                                                                                                                                                                                                                                                                                                                                                                                                                                                                                                                                                                                                                                                                                                                                                                                                                                                                                                                                                                                                                                                                                                                                                                                                                                                                                                                                                                                                                                                                                                                                                                                                                                                                                                                                                                                                                                                                                                                                                                                                                                                                                 | Ball & Stick model |          |   |   |   |         |          |          |   |         |         |          |    |         |          |          |    |         |         |         |    |          |          |          |   |         |         |          |   |         |         |          |   |         |          |          |   |         |          |          |    |         |          |         |    |          |          |          |   |          |          |         |   |          |          |         |   |          |          |         |   |          |          |         |   |          |          |         |   |          |          |         |   |          |         |         |   |         |         |          |   |          |         |          |   |          |         |         |   |          |         |         |   |          |         |         |   |          |         |          |   |          |         |          |   |          |         |          |   |          |         |          |   |          |         |          |   |          |         |         |   |          |         |         |   |          |         |         |   |          |         |          |   |          |         |         |   |         |         |         |                                                                                                                                                                                                                                                                                                                                                                                                                                                                                                                                                                                                                                                                                                                                                                                                                                                                                                                                                                                                                                                                                                                                                                                                                                                                                                                                                                                                                                                                                                                                                                                                                                                                                                                                                                                                                                                                                                                                                                                                                                                                                                                                                                                                                                                  |         |         |         |         |         |         |         |         |         |          |          |          |          |          |          |          |          |          |          |          |          |          |          |          |          |          |          |          |          |          |          |          |          |          |          |          |          |          |          |          |          |          |          |          |          |          |          |          |           |           |           |           |           |           |           |           |           |           |           |           |           |           |           |           |           |           |           |           |           |           |           |           |           |           |           |           |           |           |           |           |           |           |           |           |           |           |           |           |           |           |           |           |           |           |           |           |           |           |           |
|------------------|-------------------------------------------------------------------------------------------------------------------------------------------------------------------------------------------------------------------------------------------------------------------------------------------------------------------------------------------------------------------------------------------------------------------------------------------------------------------------------------------------------------------------------------------------------------------------------------------------------------------------------------------------------------------------------------------------------------------------------------------------------------------------------------------------------------------------------------------------------------------------------------------------------------------------------------------------------------------------------------------------------------------------------------------------------------------------------------------------------------------------------------------------------------------------------------------------------------------------------------------------------------------------------------------------------------------------------------------------------------------------------------------------------------------------------------------------------------------------------------------------------------------------------------------------------------------------------------------------------------------------------------------------------------------------------------------------------------------------------------------------------------------------------------------------------------------------------------------------------------------------------------------------------------------------------------------------------------------------------------------------------------------------------------------------------------------------------------------------------------------------------------------------------------------------------------------------------------------------------------------------------------------------------------------------------------------------------------------------------------------------------------------------------------------------------------------------------------------------------------------------------------------------------------------------------------------------------------------------------------------------------------------------------------------|--------------------|----------|---|---|---|---------|----------|----------|---|---------|---------|----------|----|---------|----------|----------|----|---------|---------|---------|----|----------|----------|----------|---|---------|---------|----------|---|---------|---------|----------|---|---------|----------|----------|---|---------|----------|----------|----|---------|----------|---------|----|----------|----------|----------|---|----------|----------|---------|---|----------|----------|---------|---|----------|----------|---------|---|----------|----------|---------|---|----------|----------|---------|---|----------|----------|---------|---|----------|---------|---------|---|---------|---------|----------|---|----------|---------|----------|---|----------|---------|---------|---|----------|---------|---------|---|----------|---------|---------|---|----------|---------|----------|---|----------|---------|----------|---|----------|---------|----------|---|----------|---------|----------|---|----------|---------|----------|---|----------|---------|---------|---|----------|---------|---------|---|----------|---------|---------|---|----------|---------|----------|---|----------|---------|---------|---|---------|---------|---------|--------------------------------------------------------------------------------------------------------------------------------------------------------------------------------------------------------------------------------------------------------------------------------------------------------------------------------------------------------------------------------------------------------------------------------------------------------------------------------------------------------------------------------------------------------------------------------------------------------------------------------------------------------------------------------------------------------------------------------------------------------------------------------------------------------------------------------------------------------------------------------------------------------------------------------------------------------------------------------------------------------------------------------------------------------------------------------------------------------------------------------------------------------------------------------------------------------------------------------------------------------------------------------------------------------------------------------------------------------------------------------------------------------------------------------------------------------------------------------------------------------------------------------------------------------------------------------------------------------------------------------------------------------------------------------------------------------------------------------------------------------------------------------------------------------------------------------------------------------------------------------------------------------------------------------------------------------------------------------------------------------------------------------------------------------------------------------------------------------------------------------------------------------------------------------------------------------------------------------------------------|---------|---------|---------|---------|---------|---------|---------|---------|---------|----------|----------|----------|----------|----------|----------|----------|----------|----------|----------|----------|----------|----------|----------|----------|----------|----------|----------|----------|----------|----------|----------|----------|----------|----------|----------|----------|----------|----------|----------|----------|----------|----------|----------|----------|----------|----------|----------|----------|-----------|-----------|-----------|-----------|-----------|-----------|-----------|-----------|-----------|-----------|-----------|-----------|-----------|-----------|-----------|-----------|-----------|-----------|-----------|-----------|-----------|-----------|-----------|-----------|-----------|-----------|-----------|-----------|-----------|-----------|-----------|-----------|-----------|-----------|-----------|-----------|-----------|-----------|-----------|-----------|-----------|-----------|-----------|-----------|-----------|-----------|-----------|-----------|-----------|-----------|-----------|
| 1Ni <sub>4</sub> |                                                                                                                                                                                                                                                                                                                                                                                                                                                                                                                                                                                                                                                                                                                                                                                                                                                                                                                                                                                                                                                                                                                                                                                                                                                                                                                                                                                                                                                                                                                                                                                                                                                                                                                                                                                                                                                                                                                                                                                                                                                                                                                                                                                                                                                                                                                                                                                                                                                                                                                                                                                                                                                                   |                    |          |   |   |   |         |          |          |   |         |         |          |    |         |          |          |    |         |         |         |    |          |          |          |   |         |         |          |   |         |         |          |   |         |          |          |   |         |          |          |    |         |          |         |    |          |          |          |   |          |          |         |   |          |          |         |   |          |          |         |   |          |          |         |   |          |          |         |   |          |          |         |   |          |         |         |   |         |         |          |   |          |         |          |   |          |         |         |   |          |         |         |   |          |         |         |   |          |         |          |   |          |         |          |   |          |         |          |   |          |         |          |   |          |         |          |   |          |         |         |   |          |         |         |   |          |         |         |   |          |         |          |   |          |         |         |   |         |         |         |                                                                                                                                                                                                                                                                                                                                                                                                                                                                                                                                                                                                                                                                                                                                                                                                                                                                                                                                                                                                                                                                                                                                                                                                                                                                                                                                                                                                                                                                                                                                                                                                                                                                                                                                                                                                                                                                                                                                                                                                                                                                                                                                                                                                                                                  |         |         |         |         |         |         |         |         |         |          |          |          |          |          |          |          |          |          |          |          |          |          |          |          |          |          |          |          |          |          |          |          |          |          |          |          |          |          |          |          |          |          |          |          |          |          |          |          |           |           |           |           |           |           |           |           |           |           |           |           |           |           |           |           |           |           |           |           |           |           |           |           |           |           |           |           |           |           |           |           |           |           |           |           |           |           |           |           |           |           |           |           |           |           |           |           |           |           |           |
|                  | <p style="text-align: center;"><b><u>Cartesian co-ordinate</u></b></p> <table border="1"> <thead> <tr> <th>Atoms</th> <th>X</th> <th>Y</th> <th>Z</th> </tr> </thead> <tbody> <tr><td>C</td><td>3.15380</td><td>-0.20008</td><td>-1.64738</td></tr> <tr><td>C</td><td>2.60596</td><td>1.07809</td><td>-1.47705</td></tr> <tr><td>Pt</td><td>1.67676</td><td>-0.27827</td><td>-0.12095</td></tr> <tr><td>Cl</td><td>3.29822</td><td>0.18215</td><td>1.45947</td></tr> <tr><td>Cl</td><td>-0.13229</td><td>-0.79552</td><td>-1.65551</td></tr> <tr><td>H</td><td>1.82114</td><td>1.44658</td><td>-2.12885</td></tr> <tr><td>H</td><td>3.11731</td><td>1.81640</td><td>-0.86779</td></tr> <tr><td>H</td><td>4.09941</td><td>-0.45602</td><td>-1.18000</td></tr> <tr><td>H</td><td>2.81392</td><td>-0.83976</td><td>-2.45687</td></tr> <tr><td>Cl</td><td>0.10711</td><td>-1.25947</td><td>1.53660</td></tr> <tr><td>Cl</td><td>-3.28464</td><td>-1.25045</td><td>-1.41610</td></tr> <tr><td>H</td><td>-2.08017</td><td>-3.06997</td><td>1.96691</td></tr> <tr><td>C</td><td>-2.85652</td><td>-2.52041</td><td>1.44151</td></tr> <tr><td>C</td><td>-3.11021</td><td>-1.22316</td><td>1.73380</td></tr> <tr><td>H</td><td>-3.46379</td><td>-3.05404</td><td>0.71658</td></tr> <tr><td>H</td><td>-3.93121</td><td>-0.69991</td><td>1.25301</td></tr> <tr><td>H</td><td>-2.54928</td><td>-0.70425</td><td>2.50697</td></tr> <tr><td>C</td><td>-1.29280</td><td>2.14675</td><td>0.96669</td></tr> <tr><td>O</td><td>0.12120</td><td>2.52092</td><td>-0.97152</td></tr> <tr><td>C</td><td>-0.98742</td><td>2.38019</td><td>-0.50752</td></tr> <tr><td>C</td><td>-0.20296</td><td>2.63622</td><td>1.90244</td></tr> <tr><td>H</td><td>-0.08199</td><td>3.72003</td><td>1.81221</td></tr> <tr><td>H</td><td>-0.44166</td><td>2.39944</td><td>2.94227</td></tr> <tr><td>C</td><td>-2.29629</td><td>2.45974</td><td>-1.28154</td></tr> <tr><td>H</td><td>-2.32066</td><td>3.42122</td><td>-1.80549</td></tr> <tr><td>C</td><td>-3.39313</td><td>2.33590</td><td>-0.21213</td></tr> <tr><td>H</td><td>-4.27095</td><td>2.94693</td><td>-0.43025</td></tr> <tr><td>H</td><td>-3.72444</td><td>1.29308</td><td>-0.15992</td></tr> <tr><td>C</td><td>-2.70104</td><td>2.73426</td><td>1.10572</td></tr> <tr><td>H</td><td>-2.62879</td><td>3.82654</td><td>1.18643</td></tr> <tr><td>H</td><td>-3.22833</td><td>2.37472</td><td>1.99394</td></tr> <tr><td>H</td><td>-2.32804</td><td>1.66888</td><td>-2.03832</td></tr> <tr><td>H</td><td>-1.38188</td><td>1.05025</td><td>1.06449</td></tr> <tr><td>H</td><td>0.75519</td><td>2.16870</td><td>1.65514</td></tr> </tbody> </table> | Atoms              | X        | Y | Z | C | 3.15380 | -0.20008 | -1.64738 | C | 2.60596 | 1.07809 | -1.47705 | Pt | 1.67676 | -0.27827 | -0.12095 | Cl | 3.29822 | 0.18215 | 1.45947 | Cl | -0.13229 | -0.79552 | -1.65551 | H | 1.82114 | 1.44658 | -2.12885 | H | 3.11731 | 1.81640 | -0.86779 | H | 4.09941 | -0.45602 | -1.18000 | H | 2.81392 | -0.83976 | -2.45687 | Cl | 0.10711 | -1.25947 | 1.53660 | Cl | -3.28464 | -1.25045 | -1.41610 | H | -2.08017 | -3.06997 | 1.96691 | C | -2.85652 | -2.52041 | 1.44151 | C | -3.11021 | -1.22316 | 1.73380 | H | -3.46379 | -3.05404 | 0.71658 | H | -3.93121 | -0.69991 | 1.25301 | H | -2.54928 | -0.70425 | 2.50697 | C | -1.29280 | 2.14675 | 0.96669 | O | 0.12120 | 2.52092 | -0.97152 | C | -0.98742 | 2.38019 | -0.50752 | C | -0.20296 | 2.63622 | 1.90244 | H | -0.08199 | 3.72003 | 1.81221 | H | -0.44166 | 2.39944 | 2.94227 | C | -2.29629 | 2.45974 | -1.28154 | H | -2.32066 | 3.42122 | -1.80549 | C | -3.39313 | 2.33590 | -0.21213 | H | -4.27095 | 2.94693 | -0.43025 | H | -3.72444 | 1.29308 | -0.15992 | C | -2.70104 | 2.73426 | 1.10572 | H | -2.62879 | 3.82654 | 1.18643 | H | -3.22833 | 2.37472 | 1.99394 | H | -2.32804 | 1.66888 | -2.03832 | H | -1.38188 | 1.05025 | 1.06449 | H | 0.75519 | 2.16870 | 1.65514 | <p style="text-align: center;"><b><u>Frequencies</u></b></p> <table border="1"> <tbody> <tr><td>21.3628</td><td>37.4913</td><td>38.5962</td></tr> <tr><td>49.1922</td><td>64.3373</td><td>72.9163</td></tr> <tr><td>83.1373</td><td>89.7493</td><td>99.4546</td></tr> <tr><td>101.1498</td><td>112.8133</td><td>120.5923</td></tr> <tr><td>140.0320</td><td>150.4421</td><td>155.6818</td></tr> <tr><td>159.8200</td><td>170.3662</td><td>178.3367</td></tr> <tr><td>195.7650</td><td>198.6395</td><td>210.1645</td></tr> <tr><td>242.8539</td><td>253.7107</td><td>258.5266</td></tr> <tr><td>285.0688</td><td>294.8852</td><td>306.2984</td></tr> <tr><td>336.5411</td><td>340.3036</td><td>356.0183</td></tr> <tr><td>383.6452</td><td>406.6350</td><td>457.9996</td></tr> <tr><td>472.5404</td><td>506.8574</td><td>560.4092</td></tr> <tr><td>576.0636</td><td>602.4747</td><td>724.1800</td></tr> <tr><td>763.5559</td><td>821.2738</td><td>840.0280</td></tr> <tr><td>844.6797</td><td>869.7726</td><td>910.9420</td></tr> <tr><td>949.5984</td><td>956.6416</td><td>995.2002</td></tr> <tr><td>1020.4740</td><td>1041.2379</td><td>1053.7790</td></tr> <tr><td>1057.1521</td><td>1068.2033</td><td>1069.6698</td></tr> <tr><td>1074.2097</td><td>1091.5129</td><td>1163.6724</td></tr> <tr><td>1188.1968</td><td>1192.2543</td><td>1213.7327</td></tr> <tr><td>1225.2066</td><td>1241.6008</td><td>1247.9106</td></tr> <tr><td>1291.3912</td><td>1298.5719</td><td>1306.3436</td></tr> <tr><td>1319.9268</td><td>1350.1518</td><td>1371.8265</td></tr> <tr><td>1380.0046</td><td>1424.5897</td><td>1455.7959</td></tr> <tr><td>1470.9436</td><td>1479.1104</td><td>1500.6893</td></tr> <tr><td>1503.9735</td><td>1505.7591</td><td>1518.7430</td></tr> <tr><td>1577.6483</td><td>1656.9179</td><td>1886.9452</td></tr> <tr><td>3027.9913</td><td>3070.9134</td><td>3073.0549</td></tr> <tr><td>3083.6200</td><td>3095.9632</td><td>3129.5923</td></tr> <tr><td>3135.0017</td><td>3148.7815</td><td>3156.8815</td></tr> <tr><td>3163.7491</td><td>3169.8212</td><td>3180.8631</td></tr> <tr><td>3187.8479</td><td>3188.2001</td><td>3268.1530</td></tr> <tr><td>3280.6991</td><td>3291.9904</td><td>3299.2011</td></tr> </tbody> </table> | 21.3628 | 37.4913 | 38.5962 | 49.1922 | 64.3373 | 72.9163 | 83.1373 | 89.7493 | 99.4546 | 101.1498 | 112.8133 | 120.5923 | 140.0320 | 150.4421 | 155.6818 | 159.8200 | 170.3662 | 178.3367 | 195.7650 | 198.6395 | 210.1645 | 242.8539 | 253.7107 | 258.5266 | 285.0688 | 294.8852 | 306.2984 | 336.5411 | 340.3036 | 356.0183 | 383.6452 | 406.6350 | 457.9996 | 472.5404 | 506.8574 | 560.4092 | 576.0636 | 602.4747 | 724.1800 | 763.5559 | 821.2738 | 840.0280 | 844.6797 | 869.7726 | 910.9420 | 949.5984 | 956.6416 | 995.2002 | 1020.4740 | 1041.2379 | 1053.7790 | 1057.1521 | 1068.2033 | 1069.6698 | 1074.2097 | 1091.5129 | 1163.6724 | 1188.1968 | 1192.2543 | 1213.7327 | 1225.2066 | 1241.6008 | 1247.9106 | 1291.3912 | 1298.5719 | 1306.3436 | 1319.9268 | 1350.1518 | 1371.8265 | 1380.0046 | 1424.5897 | 1455.7959 | 1470.9436 | 1479.1104 | 1500.6893 | 1503.9735 | 1505.7591 | 1518.7430 | 1577.6483 | 1656.9179 | 1886.9452 | 3027.9913 | 3070.9134 | 3073.0549 | 3083.6200 | 3095.9632 | 3129.5923 | 3135.0017 | 3148.7815 | 3156.8815 | 3163.7491 | 3169.8212 | 3180.8631 | 3187.8479 | 3188.2001 | 3268.1530 | 3280.6991 | 3291.9904 | 3299.2011 |
| Atoms            | X                                                                                                                                                                                                                                                                                                                                                                                                                                                                                                                                                                                                                                                                                                                                                                                                                                                                                                                                                                                                                                                                                                                                                                                                                                                                                                                                                                                                                                                                                                                                                                                                                                                                                                                                                                                                                                                                                                                                                                                                                                                                                                                                                                                                                                                                                                                                                                                                                                                                                                                                                                                                                                                                 | Y                  | Z        |   |   |   |         |          |          |   |         |         |          |    |         |          |          |    |         |         |         |    |          |          |          |   |         |         |          |   |         |         |          |   |         |          |          |   |         |          |          |    |         |          |         |    |          |          |          |   |          |          |         |   |          |          |         |   |          |          |         |   |          |          |         |   |          |          |         |   |          |          |         |   |          |         |         |   |         |         |          |   |          |         |          |   |          |         |         |   |          |         |         |   |          |         |         |   |          |         |          |   |          |         |          |   |          |         |          |   |          |         |          |   |          |         |          |   |          |         |         |   |          |         |         |   |          |         |         |   |          |         |          |   |          |         |         |   |         |         |         |                                                                                                                                                                                                                                                                                                                                                                                                                                                                                                                                                                                                                                                                                                                                                                                                                                                                                                                                                                                                                                                                                                                                                                                                                                                                                                                                                                                                                                                                                                                                                                                                                                                                                                                                                                                                                                                                                                                                                                                                                                                                                                                                                                                                                                                  |         |         |         |         |         |         |         |         |         |          |          |          |          |          |          |          |          |          |          |          |          |          |          |          |          |          |          |          |          |          |          |          |          |          |          |          |          |          |          |          |          |          |          |          |          |          |          |          |           |           |           |           |           |           |           |           |           |           |           |           |           |           |           |           |           |           |           |           |           |           |           |           |           |           |           |           |           |           |           |           |           |           |           |           |           |           |           |           |           |           |           |           |           |           |           |           |           |           |           |
| C                | 3.15380                                                                                                                                                                                                                                                                                                                                                                                                                                                                                                                                                                                                                                                                                                                                                                                                                                                                                                                                                                                                                                                                                                                                                                                                                                                                                                                                                                                                                                                                                                                                                                                                                                                                                                                                                                                                                                                                                                                                                                                                                                                                                                                                                                                                                                                                                                                                                                                                                                                                                                                                                                                                                                                           | -0.20008           | -1.64738 |   |   |   |         |          |          |   |         |         |          |    |         |          |          |    |         |         |         |    |          |          |          |   |         |         |          |   |         |         |          |   |         |          |          |   |         |          |          |    |         |          |         |    |          |          |          |   |          |          |         |   |          |          |         |   |          |          |         |   |          |          |         |   |          |          |         |   |          |          |         |   |          |         |         |   |         |         |          |   |          |         |          |   |          |         |         |   |          |         |         |   |          |         |         |   |          |         |          |   |          |         |          |   |          |         |          |   |          |         |          |   |          |         |          |   |          |         |         |   |          |         |         |   |          |         |         |   |          |         |          |   |          |         |         |   |         |         |         |                                                                                                                                                                                                                                                                                                                                                                                                                                                                                                                                                                                                                                                                                                                                                                                                                                                                                                                                                                                                                                                                                                                                                                                                                                                                                                                                                                                                                                                                                                                                                                                                                                                                                                                                                                                                                                                                                                                                                                                                                                                                                                                                                                                                                                                  |         |         |         |         |         |         |         |         |         |          |          |          |          |          |          |          |          |          |          |          |          |          |          |          |          |          |          |          |          |          |          |          |          |          |          |          |          |          |          |          |          |          |          |          |          |          |          |          |           |           |           |           |           |           |           |           |           |           |           |           |           |           |           |           |           |           |           |           |           |           |           |           |           |           |           |           |           |           |           |           |           |           |           |           |           |           |           |           |           |           |           |           |           |           |           |           |           |           |           |
| C                | 2.60596                                                                                                                                                                                                                                                                                                                                                                                                                                                                                                                                                                                                                                                                                                                                                                                                                                                                                                                                                                                                                                                                                                                                                                                                                                                                                                                                                                                                                                                                                                                                                                                                                                                                                                                                                                                                                                                                                                                                                                                                                                                                                                                                                                                                                                                                                                                                                                                                                                                                                                                                                                                                                                                           | 1.07809            | -1.47705 |   |   |   |         |          |          |   |         |         |          |    |         |          |          |    |         |         |         |    |          |          |          |   |         |         |          |   |         |         |          |   |         |          |          |   |         |          |          |    |         |          |         |    |          |          |          |   |          |          |         |   |          |          |         |   |          |          |         |   |          |          |         |   |          |          |         |   |          |          |         |   |          |         |         |   |         |         |          |   |          |         |          |   |          |         |         |   |          |         |         |   |          |         |         |   |          |         |          |   |          |         |          |   |          |         |          |   |          |         |          |   |          |         |          |   |          |         |         |   |          |         |         |   |          |         |         |   |          |         |          |   |          |         |         |   |         |         |         |                                                                                                                                                                                                                                                                                                                                                                                                                                                                                                                                                                                                                                                                                                                                                                                                                                                                                                                                                                                                                                                                                                                                                                                                                                                                                                                                                                                                                                                                                                                                                                                                                                                                                                                                                                                                                                                                                                                                                                                                                                                                                                                                                                                                                                                  |         |         |         |         |         |         |         |         |         |          |          |          |          |          |          |          |          |          |          |          |          |          |          |          |          |          |          |          |          |          |          |          |          |          |          |          |          |          |          |          |          |          |          |          |          |          |          |          |           |           |           |           |           |           |           |           |           |           |           |           |           |           |           |           |           |           |           |           |           |           |           |           |           |           |           |           |           |           |           |           |           |           |           |           |           |           |           |           |           |           |           |           |           |           |           |           |           |           |           |
| Pt               | 1.67676                                                                                                                                                                                                                                                                                                                                                                                                                                                                                                                                                                                                                                                                                                                                                                                                                                                                                                                                                                                                                                                                                                                                                                                                                                                                                                                                                                                                                                                                                                                                                                                                                                                                                                                                                                                                                                                                                                                                                                                                                                                                                                                                                                                                                                                                                                                                                                                                                                                                                                                                                                                                                                                           | -0.27827           | -0.12095 |   |   |   |         |          |          |   |         |         |          |    |         |          |          |    |         |         |         |    |          |          |          |   |         |         |          |   |         |         |          |   |         |          |          |   |         |          |          |    |         |          |         |    |          |          |          |   |          |          |         |   |          |          |         |   |          |          |         |   |          |          |         |   |          |          |         |   |          |          |         |   |          |         |         |   |         |         |          |   |          |         |          |   |          |         |         |   |          |         |         |   |          |         |         |   |          |         |          |   |          |         |          |   |          |         |          |   |          |         |          |   |          |         |          |   |          |         |         |   |          |         |         |   |          |         |         |   |          |         |          |   |          |         |         |   |         |         |         |                                                                                                                                                                                                                                                                                                                                                                                                                                                                                                                                                                                                                                                                                                                                                                                                                                                                                                                                                                                                                                                                                                                                                                                                                                                                                                                                                                                                                                                                                                                                                                                                                                                                                                                                                                                                                                                                                                                                                                                                                                                                                                                                                                                                                                                  |         |         |         |         |         |         |         |         |         |          |          |          |          |          |          |          |          |          |          |          |          |          |          |          |          |          |          |          |          |          |          |          |          |          |          |          |          |          |          |          |          |          |          |          |          |          |          |          |           |           |           |           |           |           |           |           |           |           |           |           |           |           |           |           |           |           |           |           |           |           |           |           |           |           |           |           |           |           |           |           |           |           |           |           |           |           |           |           |           |           |           |           |           |           |           |           |           |           |           |
| Cl               | 3.29822                                                                                                                                                                                                                                                                                                                                                                                                                                                                                                                                                                                                                                                                                                                                                                                                                                                                                                                                                                                                                                                                                                                                                                                                                                                                                                                                                                                                                                                                                                                                                                                                                                                                                                                                                                                                                                                                                                                                                                                                                                                                                                                                                                                                                                                                                                                                                                                                                                                                                                                                                                                                                                                           | 0.18215            | 1.45947  |   |   |   |         |          |          |   |         |         |          |    |         |          |          |    |         |         |         |    |          |          |          |   |         |         |          |   |         |         |          |   |         |          |          |   |         |          |          |    |         |          |         |    |          |          |          |   |          |          |         |   |          |          |         |   |          |          |         |   |          |          |         |   |          |          |         |   |          |          |         |   |          |         |         |   |         |         |          |   |          |         |          |   |          |         |         |   |          |         |         |   |          |         |         |   |          |         |          |   |          |         |          |   |          |         |          |   |          |         |          |   |          |         |          |   |          |         |         |   |          |         |         |   |          |         |         |   |          |         |          |   |          |         |         |   |         |         |         |                                                                                                                                                                                                                                                                                                                                                                                                                                                                                                                                                                                                                                                                                                                                                                                                                                                                                                                                                                                                                                                                                                                                                                                                                                                                                                                                                                                                                                                                                                                                                                                                                                                                                                                                                                                                                                                                                                                                                                                                                                                                                                                                                                                                                                                  |         |         |         |         |         |         |         |         |         |          |          |          |          |          |          |          |          |          |          |          |          |          |          |          |          |          |          |          |          |          |          |          |          |          |          |          |          |          |          |          |          |          |          |          |          |          |          |          |           |           |           |           |           |           |           |           |           |           |           |           |           |           |           |           |           |           |           |           |           |           |           |           |           |           |           |           |           |           |           |           |           |           |           |           |           |           |           |           |           |           |           |           |           |           |           |           |           |           |           |
| Cl               | -0.13229                                                                                                                                                                                                                                                                                                                                                                                                                                                                                                                                                                                                                                                                                                                                                                                                                                                                                                                                                                                                                                                                                                                                                                                                                                                                                                                                                                                                                                                                                                                                                                                                                                                                                                                                                                                                                                                                                                                                                                                                                                                                                                                                                                                                                                                                                                                                                                                                                                                                                                                                                                                                                                                          | -0.79552           | -1.65551 |   |   |   |         |          |          |   |         |         |          |    |         |          |          |    |         |         |         |    |          |          |          |   |         |         |          |   |         |         |          |   |         |          |          |   |         |          |          |    |         |          |         |    |          |          |          |   |          |          |         |   |          |          |         |   |          |          |         |   |          |          |         |   |          |          |         |   |          |          |         |   |          |         |         |   |         |         |          |   |          |         |          |   |          |         |         |   |          |         |         |   |          |         |         |   |          |         |          |   |          |         |          |   |          |         |          |   |          |         |          |   |          |         |          |   |          |         |         |   |          |         |         |   |          |         |         |   |          |         |          |   |          |         |         |   |         |         |         |                                                                                                                                                                                                                                                                                                                                                                                                                                                                                                                                                                                                                                                                                                                                                                                                                                                                                                                                                                                                                                                                                                                                                                                                                                                                                                                                                                                                                                                                                                                                                                                                                                                                                                                                                                                                                                                                                                                                                                                                                                                                                                                                                                                                                                                  |         |         |         |         |         |         |         |         |         |          |          |          |          |          |          |          |          |          |          |          |          |          |          |          |          |          |          |          |          |          |          |          |          |          |          |          |          |          |          |          |          |          |          |          |          |          |          |          |           |           |           |           |           |           |           |           |           |           |           |           |           |           |           |           |           |           |           |           |           |           |           |           |           |           |           |           |           |           |           |           |           |           |           |           |           |           |           |           |           |           |           |           |           |           |           |           |           |           |           |
| H                | 1.82114                                                                                                                                                                                                                                                                                                                                                                                                                                                                                                                                                                                                                                                                                                                                                                                                                                                                                                                                                                                                                                                                                                                                                                                                                                                                                                                                                                                                                                                                                                                                                                                                                                                                                                                                                                                                                                                                                                                                                                                                                                                                                                                                                                                                                                                                                                                                                                                                                                                                                                                                                                                                                                                           | 1.44658            | -2.12885 |   |   |   |         |          |          |   |         |         |          |    |         |          |          |    |         |         |         |    |          |          |          |   |         |         |          |   |         |         |          |   |         |          |          |   |         |          |          |    |         |          |         |    |          |          |          |   |          |          |         |   |          |          |         |   |          |          |         |   |          |          |         |   |          |          |         |   |          |          |         |   |          |         |         |   |         |         |          |   |          |         |          |   |          |         |         |   |          |         |         |   |          |         |         |   |          |         |          |   |          |         |          |   |          |         |          |   |          |         |          |   |          |         |          |   |          |         |         |   |          |         |         |   |          |         |         |   |          |         |          |   |          |         |         |   |         |         |         |                                                                                                                                                                                                                                                                                                                                                                                                                                                                                                                                                                                                                                                                                                                                                                                                                                                                                                                                                                                                                                                                                                                                                                                                                                                                                                                                                                                                                                                                                                                                                                                                                                                                                                                                                                                                                                                                                                                                                                                                                                                                                                                                                                                                                                                  |         |         |         |         |         |         |         |         |         |          |          |          |          |          |          |          |          |          |          |          |          |          |          |          |          |          |          |          |          |          |          |          |          |          |          |          |          |          |          |          |          |          |          |          |          |          |          |          |           |           |           |           |           |           |           |           |           |           |           |           |           |           |           |           |           |           |           |           |           |           |           |           |           |           |           |           |           |           |           |           |           |           |           |           |           |           |           |           |           |           |           |           |           |           |           |           |           |           |           |
| H                | 3.11731                                                                                                                                                                                                                                                                                                                                                                                                                                                                                                                                                                                                                                                                                                                                                                                                                                                                                                                                                                                                                                                                                                                                                                                                                                                                                                                                                                                                                                                                                                                                                                                                                                                                                                                                                                                                                                                                                                                                                                                                                                                                                                                                                                                                                                                                                                                                                                                                                                                                                                                                                                                                                                                           | 1.81640            | -0.86779 |   |   |   |         |          |          |   |         |         |          |    |         |          |          |    |         |         |         |    |          |          |          |   |         |         |          |   |         |         |          |   |         |          |          |   |         |          |          |    |         |          |         |    |          |          |          |   |          |          |         |   |          |          |         |   |          |          |         |   |          |          |         |   |          |          |         |   |          |          |         |   |          |         |         |   |         |         |          |   |          |         |          |   |          |         |         |   |          |         |         |   |          |         |         |   |          |         |          |   |          |         |          |   |          |         |          |   |          |         |          |   |          |         |          |   |          |         |         |   |          |         |         |   |          |         |         |   |          |         |          |   |          |         |         |   |         |         |         |                                                                                                                                                                                                                                                                                                                                                                                                                                                                                                                                                                                                                                                                                                                                                                                                                                                                                                                                                                                                                                                                                                                                                                                                                                                                                                                                                                                                                                                                                                                                                                                                                                                                                                                                                                                                                                                                                                                                                                                                                                                                                                                                                                                                                                                  |         |         |         |         |         |         |         |         |         |          |          |          |          |          |          |          |          |          |          |          |          |          |          |          |          |          |          |          |          |          |          |          |          |          |          |          |          |          |          |          |          |          |          |          |          |          |          |          |           |           |           |           |           |           |           |           |           |           |           |           |           |           |           |           |           |           |           |           |           |           |           |           |           |           |           |           |           |           |           |           |           |           |           |           |           |           |           |           |           |           |           |           |           |           |           |           |           |           |           |
| H                | 4.09941                                                                                                                                                                                                                                                                                                                                                                                                                                                                                                                                                                                                                                                                                                                                                                                                                                                                                                                                                                                                                                                                                                                                                                                                                                                                                                                                                                                                                                                                                                                                                                                                                                                                                                                                                                                                                                                                                                                                                                                                                                                                                                                                                                                                                                                                                                                                                                                                                                                                                                                                                                                                                                                           | -0.45602           | -1.18000 |   |   |   |         |          |          |   |         |         |          |    |         |          |          |    |         |         |         |    |          |          |          |   |         |         |          |   |         |         |          |   |         |          |          |   |         |          |          |    |         |          |         |    |          |          |          |   |          |          |         |   |          |          |         |   |          |          |         |   |          |          |         |   |          |          |         |   |          |          |         |   |          |         |         |   |         |         |          |   |          |         |          |   |          |         |         |   |          |         |         |   |          |         |         |   |          |         |          |   |          |         |          |   |          |         |          |   |          |         |          |   |          |         |          |   |          |         |         |   |          |         |         |   |          |         |         |   |          |         |          |   |          |         |         |   |         |         |         |                                                                                                                                                                                                                                                                                                                                                                                                                                                                                                                                                                                                                                                                                                                                                                                                                                                                                                                                                                                                                                                                                                                                                                                                                                                                                                                                                                                                                                                                                                                                                                                                                                                                                                                                                                                                                                                                                                                                                                                                                                                                                                                                                                                                                                                  |         |         |         |         |         |         |         |         |         |          |          |          |          |          |          |          |          |          |          |          |          |          |          |          |          |          |          |          |          |          |          |          |          |          |          |          |          |          |          |          |          |          |          |          |          |          |          |          |           |           |           |           |           |           |           |           |           |           |           |           |           |           |           |           |           |           |           |           |           |           |           |           |           |           |           |           |           |           |           |           |           |           |           |           |           |           |           |           |           |           |           |           |           |           |           |           |           |           |           |
| H                | 2.81392                                                                                                                                                                                                                                                                                                                                                                                                                                                                                                                                                                                                                                                                                                                                                                                                                                                                                                                                                                                                                                                                                                                                                                                                                                                                                                                                                                                                                                                                                                                                                                                                                                                                                                                                                                                                                                                                                                                                                                                                                                                                                                                                                                                                                                                                                                                                                                                                                                                                                                                                                                                                                                                           | -0.83976           | -2.45687 |   |   |   |         |          |          |   |         |         |          |    |         |          |          |    |         |         |         |    |          |          |          |   |         |         |          |   |         |         |          |   |         |          |          |   |         |          |          |    |         |          |         |    |          |          |          |   |          |          |         |   |          |          |         |   |          |          |         |   |          |          |         |   |          |          |         |   |          |          |         |   |          |         |         |   |         |         |          |   |          |         |          |   |          |         |         |   |          |         |         |   |          |         |         |   |          |         |          |   |          |         |          |   |          |         |          |   |          |         |          |   |          |         |          |   |          |         |         |   |          |         |         |   |          |         |         |   |          |         |          |   |          |         |         |   |         |         |         |                                                                                                                                                                                                                                                                                                                                                                                                                                                                                                                                                                                                                                                                                                                                                                                                                                                                                                                                                                                                                                                                                                                                                                                                                                                                                                                                                                                                                                                                                                                                                                                                                                                                                                                                                                                                                                                                                                                                                                                                                                                                                                                                                                                                                                                  |         |         |         |         |         |         |         |         |         |          |          |          |          |          |          |          |          |          |          |          |          |          |          |          |          |          |          |          |          |          |          |          |          |          |          |          |          |          |          |          |          |          |          |          |          |          |          |          |           |           |           |           |           |           |           |           |           |           |           |           |           |           |           |           |           |           |           |           |           |           |           |           |           |           |           |           |           |           |           |           |           |           |           |           |           |           |           |           |           |           |           |           |           |           |           |           |           |           |           |
| Cl               | 0.10711                                                                                                                                                                                                                                                                                                                                                                                                                                                                                                                                                                                                                                                                                                                                                                                                                                                                                                                                                                                                                                                                                                                                                                                                                                                                                                                                                                                                                                                                                                                                                                                                                                                                                                                                                                                                                                                                                                                                                                                                                                                                                                                                                                                                                                                                                                                                                                                                                                                                                                                                                                                                                                                           | -1.25947           | 1.53660  |   |   |   |         |          |          |   |         |         |          |    |         |          |          |    |         |         |         |    |          |          |          |   |         |         |          |   |         |         |          |   |         |          |          |   |         |          |          |    |         |          |         |    |          |          |          |   |          |          |         |   |          |          |         |   |          |          |         |   |          |          |         |   |          |          |         |   |          |          |         |   |          |         |         |   |         |         |          |   |          |         |          |   |          |         |         |   |          |         |         |   |          |         |         |   |          |         |          |   |          |         |          |   |          |         |          |   |          |         |          |   |          |         |          |   |          |         |         |   |          |         |         |   |          |         |         |   |          |         |          |   |          |         |         |   |         |         |         |                                                                                                                                                                                                                                                                                                                                                                                                                                                                                                                                                                                                                                                                                                                                                                                                                                                                                                                                                                                                                                                                                                                                                                                                                                                                                                                                                                                                                                                                                                                                                                                                                                                                                                                                                                                                                                                                                                                                                                                                                                                                                                                                                                                                                                                  |         |         |         |         |         |         |         |         |         |          |          |          |          |          |          |          |          |          |          |          |          |          |          |          |          |          |          |          |          |          |          |          |          |          |          |          |          |          |          |          |          |          |          |          |          |          |          |          |           |           |           |           |           |           |           |           |           |           |           |           |           |           |           |           |           |           |           |           |           |           |           |           |           |           |           |           |           |           |           |           |           |           |           |           |           |           |           |           |           |           |           |           |           |           |           |           |           |           |           |
| Cl               | -3.28464                                                                                                                                                                                                                                                                                                                                                                                                                                                                                                                                                                                                                                                                                                                                                                                                                                                                                                                                                                                                                                                                                                                                                                                                                                                                                                                                                                                                                                                                                                                                                                                                                                                                                                                                                                                                                                                                                                                                                                                                                                                                                                                                                                                                                                                                                                                                                                                                                                                                                                                                                                                                                                                          | -1.25045           | -1.41610 |   |   |   |         |          |          |   |         |         |          |    |         |          |          |    |         |         |         |    |          |          |          |   |         |         |          |   |         |         |          |   |         |          |          |   |         |          |          |    |         |          |         |    |          |          |          |   |          |          |         |   |          |          |         |   |          |          |         |   |          |          |         |   |          |          |         |   |          |          |         |   |          |         |         |   |         |         |          |   |          |         |          |   |          |         |         |   |          |         |         |   |          |         |         |   |          |         |          |   |          |         |          |   |          |         |          |   |          |         |          |   |          |         |          |   |          |         |         |   |          |         |         |   |          |         |         |   |          |         |          |   |          |         |         |   |         |         |         |                                                                                                                                                                                                                                                                                                                                                                                                                                                                                                                                                                                                                                                                                                                                                                                                                                                                                                                                                                                                                                                                                                                                                                                                                                                                                                                                                                                                                                                                                                                                                                                                                                                                                                                                                                                                                                                                                                                                                                                                                                                                                                                                                                                                                                                  |         |         |         |         |         |         |         |         |         |          |          |          |          |          |          |          |          |          |          |          |          |          |          |          |          |          |          |          |          |          |          |          |          |          |          |          |          |          |          |          |          |          |          |          |          |          |          |          |           |           |           |           |           |           |           |           |           |           |           |           |           |           |           |           |           |           |           |           |           |           |           |           |           |           |           |           |           |           |           |           |           |           |           |           |           |           |           |           |           |           |           |           |           |           |           |           |           |           |           |
| H                | -2.08017                                                                                                                                                                                                                                                                                                                                                                                                                                                                                                                                                                                                                                                                                                                                                                                                                                                                                                                                                                                                                                                                                                                                                                                                                                                                                                                                                                                                                                                                                                                                                                                                                                                                                                                                                                                                                                                                                                                                                                                                                                                                                                                                                                                                                                                                                                                                                                                                                                                                                                                                                                                                                                                          | -3.06997           | 1.96691  |   |   |   |         |          |          |   |         |         |          |    |         |          |          |    |         |         |         |    |          |          |          |   |         |         |          |   |         |         |          |   |         |          |          |   |         |          |          |    |         |          |         |    |          |          |          |   |          |          |         |   |          |          |         |   |          |          |         |   |          |          |         |   |          |          |         |   |          |          |         |   |          |         |         |   |         |         |          |   |          |         |          |   |          |         |         |   |          |         |         |   |          |         |         |   |          |         |          |   |          |         |          |   |          |         |          |   |          |         |          |   |          |         |          |   |          |         |         |   |          |         |         |   |          |         |         |   |          |         |          |   |          |         |         |   |         |         |         |                                                                                                                                                                                                                                                                                                                                                                                                                                                                                                                                                                                                                                                                                                                                                                                                                                                                                                                                                                                                                                                                                                                                                                                                                                                                                                                                                                                                                                                                                                                                                                                                                                                                                                                                                                                                                                                                                                                                                                                                                                                                                                                                                                                                                                                  |         |         |         |         |         |         |         |         |         |          |          |          |          |          |          |          |          |          |          |          |          |          |          |          |          |          |          |          |          |          |          |          |          |          |          |          |          |          |          |          |          |          |          |          |          |          |          |          |           |           |           |           |           |           |           |           |           |           |           |           |           |           |           |           |           |           |           |           |           |           |           |           |           |           |           |           |           |           |           |           |           |           |           |           |           |           |           |           |           |           |           |           |           |           |           |           |           |           |           |
| C                | -2.85652                                                                                                                                                                                                                                                                                                                                                                                                                                                                                                                                                                                                                                                                                                                                                                                                                                                                                                                                                                                                                                                                                                                                                                                                                                                                                                                                                                                                                                                                                                                                                                                                                                                                                                                                                                                                                                                                                                                                                                                                                                                                                                                                                                                                                                                                                                                                                                                                                                                                                                                                                                                                                                                          | -2.52041           | 1.44151  |   |   |   |         |          |          |   |         |         |          |    |         |          |          |    |         |         |         |    |          |          |          |   |         |         |          |   |         |         |          |   |         |          |          |   |         |          |          |    |         |          |         |    |          |          |          |   |          |          |         |   |          |          |         |   |          |          |         |   |          |          |         |   |          |          |         |   |          |          |         |   |          |         |         |   |         |         |          |   |          |         |          |   |          |         |         |   |          |         |         |   |          |         |         |   |          |         |          |   |          |         |          |   |          |         |          |   |          |         |          |   |          |         |          |   |          |         |         |   |          |         |         |   |          |         |         |   |          |         |          |   |          |         |         |   |         |         |         |                                                                                                                                                                                                                                                                                                                                                                                                                                                                                                                                                                                                                                                                                                                                                                                                                                                                                                                                                                                                                                                                                                                                                                                                                                                                                                                                                                                                                                                                                                                                                                                                                                                                                                                                                                                                                                                                                                                                                                                                                                                                                                                                                                                                                                                  |         |         |         |         |         |         |         |         |         |          |          |          |          |          |          |          |          |          |          |          |          |          |          |          |          |          |          |          |          |          |          |          |          |          |          |          |          |          |          |          |          |          |          |          |          |          |          |          |           |           |           |           |           |           |           |           |           |           |           |           |           |           |           |           |           |           |           |           |           |           |           |           |           |           |           |           |           |           |           |           |           |           |           |           |           |           |           |           |           |           |           |           |           |           |           |           |           |           |           |
| C                | -3.11021                                                                                                                                                                                                                                                                                                                                                                                                                                                                                                                                                                                                                                                                                                                                                                                                                                                                                                                                                                                                                                                                                                                                                                                                                                                                                                                                                                                                                                                                                                                                                                                                                                                                                                                                                                                                                                                                                                                                                                                                                                                                                                                                                                                                                                                                                                                                                                                                                                                                                                                                                                                                                                                          | -1.22316           | 1.73380  |   |   |   |         |          |          |   |         |         |          |    |         |          |          |    |         |         |         |    |          |          |          |   |         |         |          |   |         |         |          |   |         |          |          |   |         |          |          |    |         |          |         |    |          |          |          |   |          |          |         |   |          |          |         |   |          |          |         |   |          |          |         |   |          |          |         |   |          |          |         |   |          |         |         |   |         |         |          |   |          |         |          |   |          |         |         |   |          |         |         |   |          |         |         |   |          |         |          |   |          |         |          |   |          |         |          |   |          |         |          |   |          |         |          |   |          |         |         |   |          |         |         |   |          |         |         |   |          |         |          |   |          |         |         |   |         |         |         |                                                                                                                                                                                                                                                                                                                                                                                                                                                                                                                                                                                                                                                                                                                                                                                                                                                                                                                                                                                                                                                                                                                                                                                                                                                                                                                                                                                                                                                                                                                                                                                                                                                                                                                                                                                                                                                                                                                                                                                                                                                                                                                                                                                                                                                  |         |         |         |         |         |         |         |         |         |          |          |          |          |          |          |          |          |          |          |          |          |          |          |          |          |          |          |          |          |          |          |          |          |          |          |          |          |          |          |          |          |          |          |          |          |          |          |          |           |           |           |           |           |           |           |           |           |           |           |           |           |           |           |           |           |           |           |           |           |           |           |           |           |           |           |           |           |           |           |           |           |           |           |           |           |           |           |           |           |           |           |           |           |           |           |           |           |           |           |
| H                | -3.46379                                                                                                                                                                                                                                                                                                                                                                                                                                                                                                                                                                                                                                                                                                                                                                                                                                                                                                                                                                                                                                                                                                                                                                                                                                                                                                                                                                                                                                                                                                                                                                                                                                                                                                                                                                                                                                                                                                                                                                                                                                                                                                                                                                                                                                                                                                                                                                                                                                                                                                                                                                                                                                                          | -3.05404           | 0.71658  |   |   |   |         |          |          |   |         |         |          |    |         |          |          |    |         |         |         |    |          |          |          |   |         |         |          |   |         |         |          |   |         |          |          |   |         |          |          |    |         |          |         |    |          |          |          |   |          |          |         |   |          |          |         |   |          |          |         |   |          |          |         |   |          |          |         |   |          |          |         |   |          |         |         |   |         |         |          |   |          |         |          |   |          |         |         |   |          |         |         |   |          |         |         |   |          |         |          |   |          |         |          |   |          |         |          |   |          |         |          |   |          |         |          |   |          |         |         |   |          |         |         |   |          |         |         |   |          |         |          |   |          |         |         |   |         |         |         |                                                                                                                                                                                                                                                                                                                                                                                                                                                                                                                                                                                                                                                                                                                                                                                                                                                                                                                                                                                                                                                                                                                                                                                                                                                                                                                                                                                                                                                                                                                                                                                                                                                                                                                                                                                                                                                                                                                                                                                                                                                                                                                                                                                                                                                  |         |         |         |         |         |         |         |         |         |          |          |          |          |          |          |          |          |          |          |          |          |          |          |          |          |          |          |          |          |          |          |          |          |          |          |          |          |          |          |          |          |          |          |          |          |          |          |          |           |           |           |           |           |           |           |           |           |           |           |           |           |           |           |           |           |           |           |           |           |           |           |           |           |           |           |           |           |           |           |           |           |           |           |           |           |           |           |           |           |           |           |           |           |           |           |           |           |           |           |
| H                | -3.93121                                                                                                                                                                                                                                                                                                                                                                                                                                                                                                                                                                                                                                                                                                                                                                                                                                                                                                                                                                                                                                                                                                                                                                                                                                                                                                                                                                                                                                                                                                                                                                                                                                                                                                                                                                                                                                                                                                                                                                                                                                                                                                                                                                                                                                                                                                                                                                                                                                                                                                                                                                                                                                                          | -0.69991           | 1.25301  |   |   |   |         |          |          |   |         |         |          |    |         |          |          |    |         |         |         |    |          |          |          |   |         |         |          |   |         |         |          |   |         |          |          |   |         |          |          |    |         |          |         |    |          |          |          |   |          |          |         |   |          |          |         |   |          |          |         |   |          |          |         |   |          |          |         |   |          |          |         |   |          |         |         |   |         |         |          |   |          |         |          |   |          |         |         |   |          |         |         |   |          |         |         |   |          |         |          |   |          |         |          |   |          |         |          |   |          |         |          |   |          |         |          |   |          |         |         |   |          |         |         |   |          |         |         |   |          |         |          |   |          |         |         |   |         |         |         |                                                                                                                                                                                                                                                                                                                                                                                                                                                                                                                                                                                                                                                                                                                                                                                                                                                                                                                                                                                                                                                                                                                                                                                                                                                                                                                                                                                                                                                                                                                                                                                                                                                                                                                                                                                                                                                                                                                                                                                                                                                                                                                                                                                                                                                  |         |         |         |         |         |         |         |         |         |          |          |          |          |          |          |          |          |          |          |          |          |          |          |          |          |          |          |          |          |          |          |          |          |          |          |          |          |          |          |          |          |          |          |          |          |          |          |          |           |           |           |           |           |           |           |           |           |           |           |           |           |           |           |           |           |           |           |           |           |           |           |           |           |           |           |           |           |           |           |           |           |           |           |           |           |           |           |           |           |           |           |           |           |           |           |           |           |           |           |
| H                | -2.54928                                                                                                                                                                                                                                                                                                                                                                                                                                                                                                                                                                                                                                                                                                                                                                                                                                                                                                                                                                                                                                                                                                                                                                                                                                                                                                                                                                                                                                                                                                                                                                                                                                                                                                                                                                                                                                                                                                                                                                                                                                                                                                                                                                                                                                                                                                                                                                                                                                                                                                                                                                                                                                                          | -0.70425           | 2.50697  |   |   |   |         |          |          |   |         |         |          |    |         |          |          |    |         |         |         |    |          |          |          |   |         |         |          |   |         |         |          |   |         |          |          |   |         |          |          |    |         |          |         |    |          |          |          |   |          |          |         |   |          |          |         |   |          |          |         |   |          |          |         |   |          |          |         |   |          |          |         |   |          |         |         |   |         |         |          |   |          |         |          |   |          |         |         |   |          |         |         |   |          |         |         |   |          |         |          |   |          |         |          |   |          |         |          |   |          |         |          |   |          |         |          |   |          |         |         |   |          |         |         |   |          |         |         |   |          |         |          |   |          |         |         |   |         |         |         |                                                                                                                                                                                                                                                                                                                                                                                                                                                                                                                                                                                                                                                                                                                                                                                                                                                                                                                                                                                                                                                                                                                                                                                                                                                                                                                                                                                                                                                                                                                                                                                                                                                                                                                                                                                                                                                                                                                                                                                                                                                                                                                                                                                                                                                  |         |         |         |         |         |         |         |         |         |          |          |          |          |          |          |          |          |          |          |          |          |          |          |          |          |          |          |          |          |          |          |          |          |          |          |          |          |          |          |          |          |          |          |          |          |          |          |          |           |           |           |           |           |           |           |           |           |           |           |           |           |           |           |           |           |           |           |           |           |           |           |           |           |           |           |           |           |           |           |           |           |           |           |           |           |           |           |           |           |           |           |           |           |           |           |           |           |           |           |
| C                | -1.29280                                                                                                                                                                                                                                                                                                                                                                                                                                                                                                                                                                                                                                                                                                                                                                                                                                                                                                                                                                                                                                                                                                                                                                                                                                                                                                                                                                                                                                                                                                                                                                                                                                                                                                                                                                                                                                                                                                                                                                                                                                                                                                                                                                                                                                                                                                                                                                                                                                                                                                                                                                                                                                                          | 2.14675            | 0.96669  |   |   |   |         |          |          |   |         |         |          |    |         |          |          |    |         |         |         |    |          |          |          |   |         |         |          |   |         |         |          |   |         |          |          |   |         |          |          |    |         |          |         |    |          |          |          |   |          |          |         |   |          |          |         |   |          |          |         |   |          |          |         |   |          |          |         |   |          |          |         |   |          |         |         |   |         |         |          |   |          |         |          |   |          |         |         |   |          |         |         |   |          |         |         |   |          |         |          |   |          |         |          |   |          |         |          |   |          |         |          |   |          |         |          |   |          |         |         |   |          |         |         |   |          |         |         |   |          |         |          |   |          |         |         |   |         |         |         |                                                                                                                                                                                                                                                                                                                                                                                                                                                                                                                                                                                                                                                                                                                                                                                                                                                                                                                                                                                                                                                                                                                                                                                                                                                                                                                                                                                                                                                                                                                                                                                                                                                                                                                                                                                                                                                                                                                                                                                                                                                                                                                                                                                                                                                  |         |         |         |         |         |         |         |         |         |          |          |          |          |          |          |          |          |          |          |          |          |          |          |          |          |          |          |          |          |          |          |          |          |          |          |          |          |          |          |          |          |          |          |          |          |          |          |          |           |           |           |           |           |           |           |           |           |           |           |           |           |           |           |           |           |           |           |           |           |           |           |           |           |           |           |           |           |           |           |           |           |           |           |           |           |           |           |           |           |           |           |           |           |           |           |           |           |           |           |
| O                | 0.12120                                                                                                                                                                                                                                                                                                                                                                                                                                                                                                                                                                                                                                                                                                                                                                                                                                                                                                                                                                                                                                                                                                                                                                                                                                                                                                                                                                                                                                                                                                                                                                                                                                                                                                                                                                                                                                                                                                                                                                                                                                                                                                                                                                                                                                                                                                                                                                                                                                                                                                                                                                                                                                                           | 2.52092            | -0.97152 |   |   |   |         |          |          |   |         |         |          |    |         |          |          |    |         |         |         |    |          |          |          |   |         |         |          |   |         |         |          |   |         |          |          |   |         |          |          |    |         |          |         |    |          |          |          |   |          |          |         |   |          |          |         |   |          |          |         |   |          |          |         |   |          |          |         |   |          |          |         |   |          |         |         |   |         |         |          |   |          |         |          |   |          |         |         |   |          |         |         |   |          |         |         |   |          |         |          |   |          |         |          |   |          |         |          |   |          |         |          |   |          |         |          |   |          |         |         |   |          |         |         |   |          |         |         |   |          |         |          |   |          |         |         |   |         |         |         |                                                                                                                                                                                                                                                                                                                                                                                                                                                                                                                                                                                                                                                                                                                                                                                                                                                                                                                                                                                                                                                                                                                                                                                                                                                                                                                                                                                                                                                                                                                                                                                                                                                                                                                                                                                                                                                                                                                                                                                                                                                                                                                                                                                                                                                  |         |         |         |         |         |         |         |         |         |          |          |          |          |          |          |          |          |          |          |          |          |          |          |          |          |          |          |          |          |          |          |          |          |          |          |          |          |          |          |          |          |          |          |          |          |          |          |          |           |           |           |           |           |           |           |           |           |           |           |           |           |           |           |           |           |           |           |           |           |           |           |           |           |           |           |           |           |           |           |           |           |           |           |           |           |           |           |           |           |           |           |           |           |           |           |           |           |           |           |
| C                | -0.98742                                                                                                                                                                                                                                                                                                                                                                                                                                                                                                                                                                                                                                                                                                                                                                                                                                                                                                                                                                                                                                                                                                                                                                                                                                                                                                                                                                                                                                                                                                                                                                                                                                                                                                                                                                                                                                                                                                                                                                                                                                                                                                                                                                                                                                                                                                                                                                                                                                                                                                                                                                                                                                                          | 2.38019            | -0.50752 |   |   |   |         |          |          |   |         |         |          |    |         |          |          |    |         |         |         |    |          |          |          |   |         |         |          |   |         |         |          |   |         |          |          |   |         |          |          |    |         |          |         |    |          |          |          |   |          |          |         |   |          |          |         |   |          |          |         |   |          |          |         |   |          |          |         |   |          |          |         |   |          |         |         |   |         |         |          |   |          |         |          |   |          |         |         |   |          |         |         |   |          |         |         |   |          |         |          |   |          |         |          |   |          |         |          |   |          |         |          |   |          |         |          |   |          |         |         |   |          |         |         |   |          |         |         |   |          |         |          |   |          |         |         |   |         |         |         |                                                                                                                                                                                                                                                                                                                                                                                                                                                                                                                                                                                                                                                                                                                                                                                                                                                                                                                                                                                                                                                                                                                                                                                                                                                                                                                                                                                                                                                                                                                                                                                                                                                                                                                                                                                                                                                                                                                                                                                                                                                                                                                                                                                                                                                  |         |         |         |         |         |         |         |         |         |          |          |          |          |          |          |          |          |          |          |          |          |          |          |          |          |          |          |          |          |          |          |          |          |          |          |          |          |          |          |          |          |          |          |          |          |          |          |          |           |           |           |           |           |           |           |           |           |           |           |           |           |           |           |           |           |           |           |           |           |           |           |           |           |           |           |           |           |           |           |           |           |           |           |           |           |           |           |           |           |           |           |           |           |           |           |           |           |           |           |
| C                | -0.20296                                                                                                                                                                                                                                                                                                                                                                                                                                                                                                                                                                                                                                                                                                                                                                                                                                                                                                                                                                                                                                                                                                                                                                                                                                                                                                                                                                                                                                                                                                                                                                                                                                                                                                                                                                                                                                                                                                                                                                                                                                                                                                                                                                                                                                                                                                                                                                                                                                                                                                                                                                                                                                                          | 2.63622            | 1.90244  |   |   |   |         |          |          |   |         |         |          |    |         |          |          |    |         |         |         |    |          |          |          |   |         |         |          |   |         |         |          |   |         |          |          |   |         |          |          |    |         |          |         |    |          |          |          |   |          |          |         |   |          |          |         |   |          |          |         |   |          |          |         |   |          |          |         |   |          |          |         |   |          |         |         |   |         |         |          |   |          |         |          |   |          |         |         |   |          |         |         |   |          |         |         |   |          |         |          |   |          |         |          |   |          |         |          |   |          |         |          |   |          |         |          |   |          |         |         |   |          |         |         |   |          |         |         |   |          |         |          |   |          |         |         |   |         |         |         |                                                                                                                                                                                                                                                                                                                                                                                                                                                                                                                                                                                                                                                                                                                                                                                                                                                                                                                                                                                                                                                                                                                                                                                                                                                                                                                                                                                                                                                                                                                                                                                                                                                                                                                                                                                                                                                                                                                                                                                                                                                                                                                                                                                                                                                  |         |         |         |         |         |         |         |         |         |          |          |          |          |          |          |          |          |          |          |          |          |          |          |          |          |          |          |          |          |          |          |          |          |          |          |          |          |          |          |          |          |          |          |          |          |          |          |          |           |           |           |           |           |           |           |           |           |           |           |           |           |           |           |           |           |           |           |           |           |           |           |           |           |           |           |           |           |           |           |           |           |           |           |           |           |           |           |           |           |           |           |           |           |           |           |           |           |           |           |
| H                | -0.08199                                                                                                                                                                                                                                                                                                                                                                                                                                                                                                                                                                                                                                                                                                                                                                                                                                                                                                                                                                                                                                                                                                                                                                                                                                                                                                                                                                                                                                                                                                                                                                                                                                                                                                                                                                                                                                                                                                                                                                                                                                                                                                                                                                                                                                                                                                                                                                                                                                                                                                                                                                                                                                                          | 3.72003            | 1.81221  |   |   |   |         |          |          |   |         |         |          |    |         |          |          |    |         |         |         |    |          |          |          |   |         |         |          |   |         |         |          |   |         |          |          |   |         |          |          |    |         |          |         |    |          |          |          |   |          |          |         |   |          |          |         |   |          |          |         |   |          |          |         |   |          |          |         |   |          |          |         |   |          |         |         |   |         |         |          |   |          |         |          |   |          |         |         |   |          |         |         |   |          |         |         |   |          |         |          |   |          |         |          |   |          |         |          |   |          |         |          |   |          |         |          |   |          |         |         |   |          |         |         |   |          |         |         |   |          |         |          |   |          |         |         |   |         |         |         |                                                                                                                                                                                                                                                                                                                                                                                                                                                                                                                                                                                                                                                                                                                                                                                                                                                                                                                                                                                                                                                                                                                                                                                                                                                                                                                                                                                                                                                                                                                                                                                                                                                                                                                                                                                                                                                                                                                                                                                                                                                                                                                                                                                                                                                  |         |         |         |         |         |         |         |         |         |          |          |          |          |          |          |          |          |          |          |          |          |          |          |          |          |          |          |          |          |          |          |          |          |          |          |          |          |          |          |          |          |          |          |          |          |          |          |          |           |           |           |           |           |           |           |           |           |           |           |           |           |           |           |           |           |           |           |           |           |           |           |           |           |           |           |           |           |           |           |           |           |           |           |           |           |           |           |           |           |           |           |           |           |           |           |           |           |           |           |
| H                | -0.44166                                                                                                                                                                                                                                                                                                                                                                                                                                                                                                                                                                                                                                                                                                                                                                                                                                                                                                                                                                                                                                                                                                                                                                                                                                                                                                                                                                                                                                                                                                                                                                                                                                                                                                                                                                                                                                                                                                                                                                                                                                                                                                                                                                                                                                                                                                                                                                                                                                                                                                                                                                                                                                                          | 2.39944            | 2.94227  |   |   |   |         |          |          |   |         |         |          |    |         |          |          |    |         |         |         |    |          |          |          |   |         |         |          |   |         |         |          |   |         |          |          |   |         |          |          |    |         |          |         |    |          |          |          |   |          |          |         |   |          |          |         |   |          |          |         |   |          |          |         |   |          |          |         |   |          |          |         |   |          |         |         |   |         |         |          |   |          |         |          |   |          |         |         |   |          |         |         |   |          |         |         |   |          |         |          |   |          |         |          |   |          |         |          |   |          |         |          |   |          |         |          |   |          |         |         |   |          |         |         |   |          |         |         |   |          |         |          |   |          |         |         |   |         |         |         |                                                                                                                                                                                                                                                                                                                                                                                                                                                                                                                                                                                                                                                                                                                                                                                                                                                                                                                                                                                                                                                                                                                                                                                                                                                                                                                                                                                                                                                                                                                                                                                                                                                                                                                                                                                                                                                                                                                                                                                                                                                                                                                                                                                                                                                  |         |         |         |         |         |         |         |         |         |          |          |          |          |          |          |          |          |          |          |          |          |          |          |          |          |          |          |          |          |          |          |          |          |          |          |          |          |          |          |          |          |          |          |          |          |          |          |          |           |           |           |           |           |           |           |           |           |           |           |           |           |           |           |           |           |           |           |           |           |           |           |           |           |           |           |           |           |           |           |           |           |           |           |           |           |           |           |           |           |           |           |           |           |           |           |           |           |           |           |
| C                | -2.29629                                                                                                                                                                                                                                                                                                                                                                                                                                                                                                                                                                                                                                                                                                                                                                                                                                                                                                                                                                                                                                                                                                                                                                                                                                                                                                                                                                                                                                                                                                                                                                                                                                                                                                                                                                                                                                                                                                                                                                                                                                                                                                                                                                                                                                                                                                                                                                                                                                                                                                                                                                                                                                                          | 2.45974            | -1.28154 |   |   |   |         |          |          |   |         |         |          |    |         |          |          |    |         |         |         |    |          |          |          |   |         |         |          |   |         |         |          |   |         |          |          |   |         |          |          |    |         |          |         |    |          |          |          |   |          |          |         |   |          |          |         |   |          |          |         |   |          |          |         |   |          |          |         |   |          |          |         |   |          |         |         |   |         |         |          |   |          |         |          |   |          |         |         |   |          |         |         |   |          |         |         |   |          |         |          |   |          |         |          |   |          |         |          |   |          |         |          |   |          |         |          |   |          |         |         |   |          |         |         |   |          |         |         |   |          |         |          |   |          |         |         |   |         |         |         |                                                                                                                                                                                                                                                                                                                                                                                                                                                                                                                                                                                                                                                                                                                                                                                                                                                                                                                                                                                                                                                                                                                                                                                                                                                                                                                                                                                                                                                                                                                                                                                                                                                                                                                                                                                                                                                                                                                                                                                                                                                                                                                                                                                                                                                  |         |         |         |         |         |         |         |         |         |          |          |          |          |          |          |          |          |          |          |          |          |          |          |          |          |          |          |          |          |          |          |          |          |          |          |          |          |          |          |          |          |          |          |          |          |          |          |          |           |           |           |           |           |           |           |           |           |           |           |           |           |           |           |           |           |           |           |           |           |           |           |           |           |           |           |           |           |           |           |           |           |           |           |           |           |           |           |           |           |           |           |           |           |           |           |           |           |           |           |
| H                | -2.32066                                                                                                                                                                                                                                                                                                                                                                                                                                                                                                                                                                                                                                                                                                                                                                                                                                                                                                                                                                                                                                                                                                                                                                                                                                                                                                                                                                                                                                                                                                                                                                                                                                                                                                                                                                                                                                                                                                                                                                                                                                                                                                                                                                                                                                                                                                                                                                                                                                                                                                                                                                                                                                                          | 3.42122            | -1.80549 |   |   |   |         |          |          |   |         |         |          |    |         |          |          |    |         |         |         |    |          |          |          |   |         |         |          |   |         |         |          |   |         |          |          |   |         |          |          |    |         |          |         |    |          |          |          |   |          |          |         |   |          |          |         |   |          |          |         |   |          |          |         |   |          |          |         |   |          |          |         |   |          |         |         |   |         |         |          |   |          |         |          |   |          |         |         |   |          |         |         |   |          |         |         |   |          |         |          |   |          |         |          |   |          |         |          |   |          |         |          |   |          |         |          |   |          |         |         |   |          |         |         |   |          |         |         |   |          |         |          |   |          |         |         |   |         |         |         |                                                                                                                                                                                                                                                                                                                                                                                                                                                                                                                                                                                                                                                                                                                                                                                                                                                                                                                                                                                                                                                                                                                                                                                                                                                                                                                                                                                                                                                                                                                                                                                                                                                                                                                                                                                                                                                                                                                                                                                                                                                                                                                                                                                                                                                  |         |         |         |         |         |         |         |         |         |          |          |          |          |          |          |          |          |          |          |          |          |          |          |          |          |          |          |          |          |          |          |          |          |          |          |          |          |          |          |          |          |          |          |          |          |          |          |          |           |           |           |           |           |           |           |           |           |           |           |           |           |           |           |           |           |           |           |           |           |           |           |           |           |           |           |           |           |           |           |           |           |           |           |           |           |           |           |           |           |           |           |           |           |           |           |           |           |           |           |
| C                | -3.39313                                                                                                                                                                                                                                                                                                                                                                                                                                                                                                                                                                                                                                                                                                                                                                                                                                                                                                                                                                                                                                                                                                                                                                                                                                                                                                                                                                                                                                                                                                                                                                                                                                                                                                                                                                                                                                                                                                                                                                                                                                                                                                                                                                                                                                                                                                                                                                                                                                                                                                                                                                                                                                                          | 2.33590            | -0.21213 |   |   |   |         |          |          |   |         |         |          |    |         |          |          |    |         |         |         |    |          |          |          |   |         |         |          |   |         |         |          |   |         |          |          |   |         |          |          |    |         |          |         |    |          |          |          |   |          |          |         |   |          |          |         |   |          |          |         |   |          |          |         |   |          |          |         |   |          |          |         |   |          |         |         |   |         |         |          |   |          |         |          |   |          |         |         |   |          |         |         |   |          |         |         |   |          |         |          |   |          |         |          |   |          |         |          |   |          |         |          |   |          |         |          |   |          |         |         |   |          |         |         |   |          |         |         |   |          |         |          |   |          |         |         |   |         |         |         |                                                                                                                                                                                                                                                                                                                                                                                                                                                                                                                                                                                                                                                                                                                                                                                                                                                                                                                                                                                                                                                                                                                                                                                                                                                                                                                                                                                                                                                                                                                                                                                                                                                                                                                                                                                                                                                                                                                                                                                                                                                                                                                                                                                                                                                  |         |         |         |         |         |         |         |         |         |          |          |          |          |          |          |          |          |          |          |          |          |          |          |          |          |          |          |          |          |          |          |          |          |          |          |          |          |          |          |          |          |          |          |          |          |          |          |          |           |           |           |           |           |           |           |           |           |           |           |           |           |           |           |           |           |           |           |           |           |           |           |           |           |           |           |           |           |           |           |           |           |           |           |           |           |           |           |           |           |           |           |           |           |           |           |           |           |           |           |
| H                | -4.27095                                                                                                                                                                                                                                                                                                                                                                                                                                                                                                                                                                                                                                                                                                                                                                                                                                                                                                                                                                                                                                                                                                                                                                                                                                                                                                                                                                                                                                                                                                                                                                                                                                                                                                                                                                                                                                                                                                                                                                                                                                                                                                                                                                                                                                                                                                                                                                                                                                                                                                                                                                                                                                                          | 2.94693            | -0.43025 |   |   |   |         |          |          |   |         |         |          |    |         |          |          |    |         |         |         |    |          |          |          |   |         |         |          |   |         |         |          |   |         |          |          |   |         |          |          |    |         |          |         |    |          |          |          |   |          |          |         |   |          |          |         |   |          |          |         |   |          |          |         |   |          |          |         |   |          |          |         |   |          |         |         |   |         |         |          |   |          |         |          |   |          |         |         |   |          |         |         |   |          |         |         |   |          |         |          |   |          |         |          |   |          |         |          |   |          |         |          |   |          |         |          |   |          |         |         |   |          |         |         |   |          |         |         |   |          |         |          |   |          |         |         |   |         |         |         |                                                                                                                                                                                                                                                                                                                                                                                                                                                                                                                                                                                                                                                                                                                                                                                                                                                                                                                                                                                                                                                                                                                                                                                                                                                                                                                                                                                                                                                                                                                                                                                                                                                                                                                                                                                                                                                                                                                                                                                                                                                                                                                                                                                                                                                  |         |         |         |         |         |         |         |         |         |          |          |          |          |          |          |          |          |          |          |          |          |          |          |          |          |          |          |          |          |          |          |          |          |          |          |          |          |          |          |          |          |          |          |          |          |          |          |          |           |           |           |           |           |           |           |           |           |           |           |           |           |           |           |           |           |           |           |           |           |           |           |           |           |           |           |           |           |           |           |           |           |           |           |           |           |           |           |           |           |           |           |           |           |           |           |           |           |           |           |
| H                | -3.72444                                                                                                                                                                                                                                                                                                                                                                                                                                                                                                                                                                                                                                                                                                                                                                                                                                                                                                                                                                                                                                                                                                                                                                                                                                                                                                                                                                                                                                                                                                                                                                                                                                                                                                                                                                                                                                                                                                                                                                                                                                                                                                                                                                                                                                                                                                                                                                                                                                                                                                                                                                                                                                                          | 1.29308            | -0.15992 |   |   |   |         |          |          |   |         |         |          |    |         |          |          |    |         |         |         |    |          |          |          |   |         |         |          |   |         |         |          |   |         |          |          |   |         |          |          |    |         |          |         |    |          |          |          |   |          |          |         |   |          |          |         |   |          |          |         |   |          |          |         |   |          |          |         |   |          |          |         |   |          |         |         |   |         |         |          |   |          |         |          |   |          |         |         |   |          |         |         |   |          |         |         |   |          |         |          |   |          |         |          |   |          |         |          |   |          |         |          |   |          |         |          |   |          |         |         |   |          |         |         |   |          |         |         |   |          |         |          |   |          |         |         |   |         |         |         |                                                                                                                                                                                                                                                                                                                                                                                                                                                                                                                                                                                                                                                                                                                                                                                                                                                                                                                                                                                                                                                                                                                                                                                                                                                                                                                                                                                                                                                                                                                                                                                                                                                                                                                                                                                                                                                                                                                                                                                                                                                                                                                                                                                                                                                  |         |         |         |         |         |         |         |         |         |          |          |          |          |          |          |          |          |          |          |          |          |          |          |          |          |          |          |          |          |          |          |          |          |          |          |          |          |          |          |          |          |          |          |          |          |          |          |          |           |           |           |           |           |           |           |           |           |           |           |           |           |           |           |           |           |           |           |           |           |           |           |           |           |           |           |           |           |           |           |           |           |           |           |           |           |           |           |           |           |           |           |           |           |           |           |           |           |           |           |
| C                | -2.70104                                                                                                                                                                                                                                                                                                                                                                                                                                                                                                                                                                                                                                                                                                                                                                                                                                                                                                                                                                                                                                                                                                                                                                                                                                                                                                                                                                                                                                                                                                                                                                                                                                                                                                                                                                                                                                                                                                                                                                                                                                                                                                                                                                                                                                                                                                                                                                                                                                                                                                                                                                                                                                                          | 2.73426            | 1.10572  |   |   |   |         |          |          |   |         |         |          |    |         |          |          |    |         |         |         |    |          |          |          |   |         |         |          |   |         |         |          |   |         |          |          |   |         |          |          |    |         |          |         |    |          |          |          |   |          |          |         |   |          |          |         |   |          |          |         |   |          |          |         |   |          |          |         |   |          |          |         |   |          |         |         |   |         |         |          |   |          |         |          |   |          |         |         |   |          |         |         |   |          |         |         |   |          |         |          |   |          |         |          |   |          |         |          |   |          |         |          |   |          |         |          |   |          |         |         |   |          |         |         |   |          |         |         |   |          |         |          |   |          |         |         |   |         |         |         |                                                                                                                                                                                                                                                                                                                                                                                                                                                                                                                                                                                                                                                                                                                                                                                                                                                                                                                                                                                                                                                                                                                                                                                                                                                                                                                                                                                                                                                                                                                                                                                                                                                                                                                                                                                                                                                                                                                                                                                                                                                                                                                                                                                                                                                  |         |         |         |         |         |         |         |         |         |          |          |          |          |          |          |          |          |          |          |          |          |          |          |          |          |          |          |          |          |          |          |          |          |          |          |          |          |          |          |          |          |          |          |          |          |          |          |          |           |           |           |           |           |           |           |           |           |           |           |           |           |           |           |           |           |           |           |           |           |           |           |           |           |           |           |           |           |           |           |           |           |           |           |           |           |           |           |           |           |           |           |           |           |           |           |           |           |           |           |
| H                | -2.62879                                                                                                                                                                                                                                                                                                                                                                                                                                                                                                                                                                                                                                                                                                                                                                                                                                                                                                                                                                                                                                                                                                                                                                                                                                                                                                                                                                                                                                                                                                                                                                                                                                                                                                                                                                                                                                                                                                                                                                                                                                                                                                                                                                                                                                                                                                                                                                                                                                                                                                                                                                                                                                                          | 3.82654            | 1.18643  |   |   |   |         |          |          |   |         |         |          |    |         |          |          |    |         |         |         |    |          |          |          |   |         |         |          |   |         |         |          |   |         |          |          |   |         |          |          |    |         |          |         |    |          |          |          |   |          |          |         |   |          |          |         |   |          |          |         |   |          |          |         |   |          |          |         |   |          |          |         |   |          |         |         |   |         |         |          |   |          |         |          |   |          |         |         |   |          |         |         |   |          |         |         |   |          |         |          |   |          |         |          |   |          |         |          |   |          |         |          |   |          |         |          |   |          |         |         |   |          |         |         |   |          |         |         |   |          |         |          |   |          |         |         |   |         |         |         |                                                                                                                                                                                                                                                                                                                                                                                                                                                                                                                                                                                                                                                                                                                                                                                                                                                                                                                                                                                                                                                                                                                                                                                                                                                                                                                                                                                                                                                                                                                                                                                                                                                                                                                                                                                                                                                                                                                                                                                                                                                                                                                                                                                                                                                  |         |         |         |         |         |         |         |         |         |          |          |          |          |          |          |          |          |          |          |          |          |          |          |          |          |          |          |          |          |          |          |          |          |          |          |          |          |          |          |          |          |          |          |          |          |          |          |          |           |           |           |           |           |           |           |           |           |           |           |           |           |           |           |           |           |           |           |           |           |           |           |           |           |           |           |           |           |           |           |           |           |           |           |           |           |           |           |           |           |           |           |           |           |           |           |           |           |           |           |
| H                | -3.22833                                                                                                                                                                                                                                                                                                                                                                                                                                                                                                                                                                                                                                                                                                                                                                                                                                                                                                                                                                                                                                                                                                                                                                                                                                                                                                                                                                                                                                                                                                                                                                                                                                                                                                                                                                                                                                                                                                                                                                                                                                                                                                                                                                                                                                                                                                                                                                                                                                                                                                                                                                                                                                                          | 2.37472            | 1.99394  |   |   |   |         |          |          |   |         |         |          |    |         |          |          |    |         |         |         |    |          |          |          |   |         |         |          |   |         |         |          |   |         |          |          |   |         |          |          |    |         |          |         |    |          |          |          |   |          |          |         |   |          |          |         |   |          |          |         |   |          |          |         |   |          |          |         |   |          |          |         |   |          |         |         |   |         |         |          |   |          |         |          |   |          |         |         |   |          |         |         |   |          |         |         |   |          |         |          |   |          |         |          |   |          |         |          |   |          |         |          |   |          |         |          |   |          |         |         |   |          |         |         |   |          |         |         |   |          |         |          |   |          |         |         |   |         |         |         |                                                                                                                                                                                                                                                                                                                                                                                                                                                                                                                                                                                                                                                                                                                                                                                                                                                                                                                                                                                                                                                                                                                                                                                                                                                                                                                                                                                                                                                                                                                                                                                                                                                                                                                                                                                                                                                                                                                                                                                                                                                                                                                                                                                                                                                  |         |         |         |         |         |         |         |         |         |          |          |          |          |          |          |          |          |          |          |          |          |          |          |          |          |          |          |          |          |          |          |          |          |          |          |          |          |          |          |          |          |          |          |          |          |          |          |          |           |           |           |           |           |           |           |           |           |           |           |           |           |           |           |           |           |           |           |           |           |           |           |           |           |           |           |           |           |           |           |           |           |           |           |           |           |           |           |           |           |           |           |           |           |           |           |           |           |           |           |
| H                | -2.32804                                                                                                                                                                                                                                                                                                                                                                                                                                                                                                                                                                                                                                                                                                                                                                                                                                                                                                                                                                                                                                                                                                                                                                                                                                                                                                                                                                                                                                                                                                                                                                                                                                                                                                                                                                                                                                                                                                                                                                                                                                                                                                                                                                                                                                                                                                                                                                                                                                                                                                                                                                                                                                                          | 1.66888            | -2.03832 |   |   |   |         |          |          |   |         |         |          |    |         |          |          |    |         |         |         |    |          |          |          |   |         |         |          |   |         |         |          |   |         |          |          |   |         |          |          |    |         |          |         |    |          |          |          |   |          |          |         |   |          |          |         |   |          |          |         |   |          |          |         |   |          |          |         |   |          |          |         |   |          |         |         |   |         |         |          |   |          |         |          |   |          |         |         |   |          |         |         |   |          |         |         |   |          |         |          |   |          |         |          |   |          |         |          |   |          |         |          |   |          |         |          |   |          |         |         |   |          |         |         |   |          |         |         |   |          |         |          |   |          |         |         |   |         |         |         |                                                                                                                                                                                                                                                                                                                                                                                                                                                                                                                                                                                                                                                                                                                                                                                                                                                                                                                                                                                                                                                                                                                                                                                                                                                                                                                                                                                                                                                                                                                                                                                                                                                                                                                                                                                                                                                                                                                                                                                                                                                                                                                                                                                                                                                  |         |         |         |         |         |         |         |         |         |          |          |          |          |          |          |          |          |          |          |          |          |          |          |          |          |          |          |          |          |          |          |          |          |          |          |          |          |          |          |          |          |          |          |          |          |          |          |          |           |           |           |           |           |           |           |           |           |           |           |           |           |           |           |           |           |           |           |           |           |           |           |           |           |           |           |           |           |           |           |           |           |           |           |           |           |           |           |           |           |           |           |           |           |           |           |           |           |           |           |
| H                | -1.38188                                                                                                                                                                                                                                                                                                                                                                                                                                                                                                                                                                                                                                                                                                                                                                                                                                                                                                                                                                                                                                                                                                                                                                                                                                                                                                                                                                                                                                                                                                                                                                                                                                                                                                                                                                                                                                                                                                                                                                                                                                                                                                                                                                                                                                                                                                                                                                                                                                                                                                                                                                                                                                                          | 1.05025            | 1.06449  |   |   |   |         |          |          |   |         |         |          |    |         |          |          |    |         |         |         |    |          |          |          |   |         |         |          |   |         |         |          |   |         |          |          |   |         |          |          |    |         |          |         |    |          |          |          |   |          |          |         |   |          |          |         |   |          |          |         |   |          |          |         |   |          |          |         |   |          |          |         |   |          |         |         |   |         |         |          |   |          |         |          |   |          |         |         |   |          |         |         |   |          |         |         |   |          |         |          |   |          |         |          |   |          |         |          |   |          |         |          |   |          |         |          |   |          |         |         |   |          |         |         |   |          |         |         |   |          |         |          |   |          |         |         |   |         |         |         |                                                                                                                                                                                                                                                                                                                                                                                                                                                                                                                                                                                                                                                                                                                                                                                                                                                                                                                                                                                                                                                                                                                                                                                                                                                                                                                                                                                                                                                                                                                                                                                                                                                                                                                                                                                                                                                                                                                                                                                                                                                                                                                                                                                                                                                  |         |         |         |         |         |         |         |         |         |          |          |          |          |          |          |          |          |          |          |          |          |          |          |          |          |          |          |          |          |          |          |          |          |          |          |          |          |          |          |          |          |          |          |          |          |          |          |          |           |           |           |           |           |           |           |           |           |           |           |           |           |           |           |           |           |           |           |           |           |           |           |           |           |           |           |           |           |           |           |           |           |           |           |           |           |           |           |           |           |           |           |           |           |           |           |           |           |           |           |
| H                | 0.75519                                                                                                                                                                                                                                                                                                                                                                                                                                                                                                                                                                                                                                                                                                                                                                                                                                                                                                                                                                                                                                                                                                                                                                                                                                                                                                                                                                                                                                                                                                                                                                                                                                                                                                                                                                                                                                                                                                                                                                                                                                                                                                                                                                                                                                                                                                                                                                                                                                                                                                                                                                                                                                                           | 2.16870            | 1.65514  |   |   |   |         |          |          |   |         |         |          |    |         |          |          |    |         |         |         |    |          |          |          |   |         |         |          |   |         |         |          |   |         |          |          |   |         |          |          |    |         |          |         |    |          |          |          |   |          |          |         |   |          |          |         |   |          |          |         |   |          |          |         |   |          |          |         |   |          |          |         |   |          |         |         |   |         |         |          |   |          |         |          |   |          |         |         |   |          |         |         |   |          |         |         |   |          |         |          |   |          |         |          |   |          |         |          |   |          |         |          |   |          |         |          |   |          |         |         |   |          |         |         |   |          |         |         |   |          |         |          |   |          |         |         |   |         |         |         |                                                                                                                                                                                                                                                                                                                                                                                                                                                                                                                                                                                                                                                                                                                                                                                                                                                                                                                                                                                                                                                                                                                                                                                                                                                                                                                                                                                                                                                                                                                                                                                                                                                                                                                                                                                                                                                                                                                                                                                                                                                                                                                                                                                                                                                  |         |         |         |         |         |         |         |         |         |          |          |          |          |          |          |          |          |          |          |          |          |          |          |          |          |          |          |          |          |          |          |          |          |          |          |          |          |          |          |          |          |          |          |          |          |          |          |          |           |           |           |           |           |           |           |           |           |           |           |           |           |           |           |           |           |           |           |           |           |           |           |           |           |           |           |           |           |           |           |           |           |           |           |           |           |           |           |           |           |           |           |           |           |           |           |           |           |           |           |
| 21.3628          | 37.4913                                                                                                                                                                                                                                                                                                                                                                                                                                                                                                                                                                                                                                                                                                                                                                                                                                                                                                                                                                                                                                                                                                                                                                                                                                                                                                                                                                                                                                                                                                                                                                                                                                                                                                                                                                                                                                                                                                                                                                                                                                                                                                                                                                                                                                                                                                                                                                                                                                                                                                                                                                                                                                                           | 38.5962            |          |   |   |   |         |          |          |   |         |         |          |    |         |          |          |    |         |         |         |    |          |          |          |   |         |         |          |   |         |         |          |   |         |          |          |   |         |          |          |    |         |          |         |    |          |          |          |   |          |          |         |   |          |          |         |   |          |          |         |   |          |          |         |   |          |          |         |   |          |          |         |   |          |         |         |   |         |         |          |   |          |         |          |   |          |         |         |   |          |         |         |   |          |         |         |   |          |         |          |   |          |         |          |   |          |         |          |   |          |         |          |   |          |         |          |   |          |         |         |   |          |         |         |   |          |         |         |   |          |         |          |   |          |         |         |   |         |         |         |                                                                                                                                                                                                                                                                                                                                                                                                                                                                                                                                                                                                                                                                                                                                                                                                                                                                                                                                                                                                                                                                                                                                                                                                                                                                                                                                                                                                                                                                                                                                                                                                                                                                                                                                                                                                                                                                                                                                                                                                                                                                                                                                                                                                                                                  |         |         |         |         |         |         |         |         |         |          |          |          |          |          |          |          |          |          |          |          |          |          |          |          |          |          |          |          |          |          |          |          |          |          |          |          |          |          |          |          |          |          |          |          |          |          |          |          |           |           |           |           |           |           |           |           |           |           |           |           |           |           |           |           |           |           |           |           |           |           |           |           |           |           |           |           |           |           |           |           |           |           |           |           |           |           |           |           |           |           |           |           |           |           |           |           |           |           |           |
| 49.1922          | 64.3373                                                                                                                                                                                                                                                                                                                                                                                                                                                                                                                                                                                                                                                                                                                                                                                                                                                                                                                                                                                                                                                                                                                                                                                                                                                                                                                                                                                                                                                                                                                                                                                                                                                                                                                                                                                                                                                                                                                                                                                                                                                                                                                                                                                                                                                                                                                                                                                                                                                                                                                                                                                                                                                           | 72.9163            |          |   |   |   |         |          |          |   |         |         |          |    |         |          |          |    |         |         |         |    |          |          |          |   |         |         |          |   |         |         |          |   |         |          |          |   |         |          |          |    |         |          |         |    |          |          |          |   |          |          |         |   |          |          |         |   |          |          |         |   |          |          |         |   |          |          |         |   |          |          |         |   |          |         |         |   |         |         |          |   |          |         |          |   |          |         |         |   |          |         |         |   |          |         |         |   |          |         |          |   |          |         |          |   |          |         |          |   |          |         |          |   |          |         |          |   |          |         |         |   |          |         |         |   |          |         |         |   |          |         |          |   |          |         |         |   |         |         |         |                                                                                                                                                                                                                                                                                                                                                                                                                                                                                                                                                                                                                                                                                                                                                                                                                                                                                                                                                                                                                                                                                                                                                                                                                                                                                                                                                                                                                                                                                                                                                                                                                                                                                                                                                                                                                                                                                                                                                                                                                                                                                                                                                                                                                                                  |         |         |         |         |         |         |         |         |         |          |          |          |          |          |          |          |          |          |          |          |          |          |          |          |          |          |          |          |          |          |          |          |          |          |          |          |          |          |          |          |          |          |          |          |          |          |          |          |           |           |           |           |           |           |           |           |           |           |           |           |           |           |           |           |           |           |           |           |           |           |           |           |           |           |           |           |           |           |           |           |           |           |           |           |           |           |           |           |           |           |           |           |           |           |           |           |           |           |           |
| 83.1373          | 89.7493                                                                                                                                                                                                                                                                                                                                                                                                                                                                                                                                                                                                                                                                                                                                                                                                                                                                                                                                                                                                                                                                                                                                                                                                                                                                                                                                                                                                                                                                                                                                                                                                                                                                                                                                                                                                                                                                                                                                                                                                                                                                                                                                                                                                                                                                                                                                                                                                                                                                                                                                                                                                                                                           | 99.4546            |          |   |   |   |         |          |          |   |         |         |          |    |         |          |          |    |         |         |         |    |          |          |          |   |         |         |          |   |         |         |          |   |         |          |          |   |         |          |          |    |         |          |         |    |          |          |          |   |          |          |         |   |          |          |         |   |          |          |         |   |          |          |         |   |          |          |         |   |          |          |         |   |          |         |         |   |         |         |          |   |          |         |          |   |          |         |         |   |          |         |         |   |          |         |         |   |          |         |          |   |          |         |          |   |          |         |          |   |          |         |          |   |          |         |          |   |          |         |         |   |          |         |         |   |          |         |         |   |          |         |          |   |          |         |         |   |         |         |         |                                                                                                                                                                                                                                                                                                                                                                                                                                                                                                                                                                                                                                                                                                                                                                                                                                                                                                                                                                                                                                                                                                                                                                                                                                                                                                                                                                                                                                                                                                                                                                                                                                                                                                                                                                                                                                                                                                                                                                                                                                                                                                                                                                                                                                                  |         |         |         |         |         |         |         |         |         |          |          |          |          |          |          |          |          |          |          |          |          |          |          |          |          |          |          |          |          |          |          |          |          |          |          |          |          |          |          |          |          |          |          |          |          |          |          |          |           |           |           |           |           |           |           |           |           |           |           |           |           |           |           |           |           |           |           |           |           |           |           |           |           |           |           |           |           |           |           |           |           |           |           |           |           |           |           |           |           |           |           |           |           |           |           |           |           |           |           |
| 101.1498         | 112.8133                                                                                                                                                                                                                                                                                                                                                                                                                                                                                                                                                                                                                                                                                                                                                                                                                                                                                                                                                                                                                                                                                                                                                                                                                                                                                                                                                                                                                                                                                                                                                                                                                                                                                                                                                                                                                                                                                                                                                                                                                                                                                                                                                                                                                                                                                                                                                                                                                                                                                                                                                                                                                                                          | 120.5923           |          |   |   |   |         |          |          |   |         |         |          |    |         |          |          |    |         |         |         |    |          |          |          |   |         |         |          |   |         |         |          |   |         |          |          |   |         |          |          |    |         |          |         |    |          |          |          |   |          |          |         |   |          |          |         |   |          |          |         |   |          |          |         |   |          |          |         |   |          |          |         |   |          |         |         |   |         |         |          |   |          |         |          |   |          |         |         |   |          |         |         |   |          |         |         |   |          |         |          |   |          |         |          |   |          |         |          |   |          |         |          |   |          |         |          |   |          |         |         |   |          |         |         |   |          |         |         |   |          |         |          |   |          |         |         |   |         |         |         |                                                                                                                                                                                                                                                                                                                                                                                                                                                                                                                                                                                                                                                                                                                                                                                                                                                                                                                                                                                                                                                                                                                                                                                                                                                                                                                                                                                                                                                                                                                                                                                                                                                                                                                                                                                                                                                                                                                                                                                                                                                                                                                                                                                                                                                  |         |         |         |         |         |         |         |         |         |          |          |          |          |          |          |          |          |          |          |          |          |          |          |          |          |          |          |          |          |          |          |          |          |          |          |          |          |          |          |          |          |          |          |          |          |          |          |          |           |           |           |           |           |           |           |           |           |           |           |           |           |           |           |           |           |           |           |           |           |           |           |           |           |           |           |           |           |           |           |           |           |           |           |           |           |           |           |           |           |           |           |           |           |           |           |           |           |           |           |
| 140.0320         | 150.4421                                                                                                                                                                                                                                                                                                                                                                                                                                                                                                                                                                                                                                                                                                                                                                                                                                                                                                                                                                                                                                                                                                                                                                                                                                                                                                                                                                                                                                                                                                                                                                                                                                                                                                                                                                                                                                                                                                                                                                                                                                                                                                                                                                                                                                                                                                                                                                                                                                                                                                                                                                                                                                                          | 155.6818           |          |   |   |   |         |          |          |   |         |         |          |    |         |          |          |    |         |         |         |    |          |          |          |   |         |         |          |   |         |         |          |   |         |          |          |   |         |          |          |    |         |          |         |    |          |          |          |   |          |          |         |   |          |          |         |   |          |          |         |   |          |          |         |   |          |          |         |   |          |          |         |   |          |         |         |   |         |         |          |   |          |         |          |   |          |         |         |   |          |         |         |   |          |         |         |   |          |         |          |   |          |         |          |   |          |         |          |   |          |         |          |   |          |         |          |   |          |         |         |   |          |         |         |   |          |         |         |   |          |         |          |   |          |         |         |   |         |         |         |                                                                                                                                                                                                                                                                                                                                                                                                                                                                                                                                                                                                                                                                                                                                                                                                                                                                                                                                                                                                                                                                                                                                                                                                                                                                                                                                                                                                                                                                                                                                                                                                                                                                                                                                                                                                                                                                                                                                                                                                                                                                                                                                                                                                                                                  |         |         |         |         |         |         |         |         |         |          |          |          |          |          |          |          |          |          |          |          |          |          |          |          |          |          |          |          |          |          |          |          |          |          |          |          |          |          |          |          |          |          |          |          |          |          |          |          |           |           |           |           |           |           |           |           |           |           |           |           |           |           |           |           |           |           |           |           |           |           |           |           |           |           |           |           |           |           |           |           |           |           |           |           |           |           |           |           |           |           |           |           |           |           |           |           |           |           |           |
| 159.8200         | 170.3662                                                                                                                                                                                                                                                                                                                                                                                                                                                                                                                                                                                                                                                                                                                                                                                                                                                                                                                                                                                                                                                                                                                                                                                                                                                                                                                                                                                                                                                                                                                                                                                                                                                                                                                                                                                                                                                                                                                                                                                                                                                                                                                                                                                                                                                                                                                                                                                                                                                                                                                                                                                                                                                          | 178.3367           |          |   |   |   |         |          |          |   |         |         |          |    |         |          |          |    |         |         |         |    |          |          |          |   |         |         |          |   |         |         |          |   |         |          |          |   |         |          |          |    |         |          |         |    |          |          |          |   |          |          |         |   |          |          |         |   |          |          |         |   |          |          |         |   |          |          |         |   |          |          |         |   |          |         |         |   |         |         |          |   |          |         |          |   |          |         |         |   |          |         |         |   |          |         |         |   |          |         |          |   |          |         |          |   |          |         |          |   |          |         |          |   |          |         |          |   |          |         |         |   |          |         |         |   |          |         |         |   |          |         |          |   |          |         |         |   |         |         |         |                                                                                                                                                                                                                                                                                                                                                                                                                                                                                                                                                                                                                                                                                                                                                                                                                                                                                                                                                                                                                                                                                                                                                                                                                                                                                                                                                                                                                                                                                                                                                                                                                                                                                                                                                                                                                                                                                                                                                                                                                                                                                                                                                                                                                                                  |         |         |         |         |         |         |         |         |         |          |          |          |          |          |          |          |          |          |          |          |          |          |          |          |          |          |          |          |          |          |          |          |          |          |          |          |          |          |          |          |          |          |          |          |          |          |          |          |           |           |           |           |           |           |           |           |           |           |           |           |           |           |           |           |           |           |           |           |           |           |           |           |           |           |           |           |           |           |           |           |           |           |           |           |           |           |           |           |           |           |           |           |           |           |           |           |           |           |           |
| 195.7650         | 198.6395                                                                                                                                                                                                                                                                                                                                                                                                                                                                                                                                                                                                                                                                                                                                                                                                                                                                                                                                                                                                                                                                                                                                                                                                                                                                                                                                                                                                                                                                                                                                                                                                                                                                                                                                                                                                                                                                                                                                                                                                                                                                                                                                                                                                                                                                                                                                                                                                                                                                                                                                                                                                                                                          | 210.1645           |          |   |   |   |         |          |          |   |         |         |          |    |         |          |          |    |         |         |         |    |          |          |          |   |         |         |          |   |         |         |          |   |         |          |          |   |         |          |          |    |         |          |         |    |          |          |          |   |          |          |         |   |          |          |         |   |          |          |         |   |          |          |         |   |          |          |         |   |          |          |         |   |          |         |         |   |         |         |          |   |          |         |          |   |          |         |         |   |          |         |         |   |          |         |         |   |          |         |          |   |          |         |          |   |          |         |          |   |          |         |          |   |          |         |          |   |          |         |         |   |          |         |         |   |          |         |         |   |          |         |          |   |          |         |         |   |         |         |         |                                                                                                                                                                                                                                                                                                                                                                                                                                                                                                                                                                                                                                                                                                                                                                                                                                                                                                                                                                                                                                                                                                                                                                                                                                                                                                                                                                                                                                                                                                                                                                                                                                                                                                                                                                                                                                                                                                                                                                                                                                                                                                                                                                                                                                                  |         |         |         |         |         |         |         |         |         |          |          |          |          |          |          |          |          |          |          |          |          |          |          |          |          |          |          |          |          |          |          |          |          |          |          |          |          |          |          |          |          |          |          |          |          |          |          |          |           |           |           |           |           |           |           |           |           |           |           |           |           |           |           |           |           |           |           |           |           |           |           |           |           |           |           |           |           |           |           |           |           |           |           |           |           |           |           |           |           |           |           |           |           |           |           |           |           |           |           |
| 242.8539         | 253.7107                                                                                                                                                                                                                                                                                                                                                                                                                                                                                                                                                                                                                                                                                                                                                                                                                                                                                                                                                                                                                                                                                                                                                                                                                                                                                                                                                                                                                                                                                                                                                                                                                                                                                                                                                                                                                                                                                                                                                                                                                                                                                                                                                                                                                                                                                                                                                                                                                                                                                                                                                                                                                                                          | 258.5266           |          |   |   |   |         |          |          |   |         |         |          |    |         |          |          |    |         |         |         |    |          |          |          |   |         |         |          |   |         |         |          |   |         |          |          |   |         |          |          |    |         |          |         |    |          |          |          |   |          |          |         |   |          |          |         |   |          |          |         |   |          |          |         |   |          |          |         |   |          |          |         |   |          |         |         |   |         |         |          |   |          |         |          |   |          |         |         |   |          |         |         |   |          |         |         |   |          |         |          |   |          |         |          |   |          |         |          |   |          |         |          |   |          |         |          |   |          |         |         |   |          |         |         |   |          |         |         |   |          |         |          |   |          |         |         |   |         |         |         |                                                                                                                                                                                                                                                                                                                                                                                                                                                                                                                                                                                                                                                                                                                                                                                                                                                                                                                                                                                                                                                                                                                                                                                                                                                                                                                                                                                                                                                                                                                                                                                                                                                                                                                                                                                                                                                                                                                                                                                                                                                                                                                                                                                                                                                  |         |         |         |         |         |         |         |         |         |          |          |          |          |          |          |          |          |          |          |          |          |          |          |          |          |          |          |          |          |          |          |          |          |          |          |          |          |          |          |          |          |          |          |          |          |          |          |          |           |           |           |           |           |           |           |           |           |           |           |           |           |           |           |           |           |           |           |           |           |           |           |           |           |           |           |           |           |           |           |           |           |           |           |           |           |           |           |           |           |           |           |           |           |           |           |           |           |           |           |
| 285.0688         | 294.8852                                                                                                                                                                                                                                                                                                                                                                                                                                                                                                                                                                                                                                                                                                                                                                                                                                                                                                                                                                                                                                                                                                                                                                                                                                                                                                                                                                                                                                                                                                                                                                                                                                                                                                                                                                                                                                                                                                                                                                                                                                                                                                                                                                                                                                                                                                                                                                                                                                                                                                                                                                                                                                                          | 306.2984           |          |   |   |   |         |          |          |   |         |         |          |    |         |          |          |    |         |         |         |    |          |          |          |   |         |         |          |   |         |         |          |   |         |          |          |   |         |          |          |    |         |          |         |    |          |          |          |   |          |          |         |   |          |          |         |   |          |          |         |   |          |          |         |   |          |          |         |   |          |          |         |   |          |         |         |   |         |         |          |   |          |         |          |   |          |         |         |   |          |         |         |   |          |         |         |   |          |         |          |   |          |         |          |   |          |         |          |   |          |         |          |   |          |         |          |   |          |         |         |   |          |         |         |   |          |         |         |   |          |         |          |   |          |         |         |   |         |         |         |                                                                                                                                                                                                                                                                                                                                                                                                                                                                                                                                                                                                                                                                                                                                                                                                                                                                                                                                                                                                                                                                                                                                                                                                                                                                                                                                                                                                                                                                                                                                                                                                                                                                                                                                                                                                                                                                                                                                                                                                                                                                                                                                                                                                                                                  |         |         |         |         |         |         |         |         |         |          |          |          |          |          |          |          |          |          |          |          |          |          |          |          |          |          |          |          |          |          |          |          |          |          |          |          |          |          |          |          |          |          |          |          |          |          |          |          |           |           |           |           |           |           |           |           |           |           |           |           |           |           |           |           |           |           |           |           |           |           |           |           |           |           |           |           |           |           |           |           |           |           |           |           |           |           |           |           |           |           |           |           |           |           |           |           |           |           |           |
| 336.5411         | 340.3036                                                                                                                                                                                                                                                                                                                                                                                                                                                                                                                                                                                                                                                                                                                                                                                                                                                                                                                                                                                                                                                                                                                                                                                                                                                                                                                                                                                                                                                                                                                                                                                                                                                                                                                                                                                                                                                                                                                                                                                                                                                                                                                                                                                                                                                                                                                                                                                                                                                                                                                                                                                                                                                          | 356.0183           |          |   |   |   |         |          |          |   |         |         |          |    |         |          |          |    |         |         |         |    |          |          |          |   |         |         |          |   |         |         |          |   |         |          |          |   |         |          |          |    |         |          |         |    |          |          |          |   |          |          |         |   |          |          |         |   |          |          |         |   |          |          |         |   |          |          |         |   |          |          |         |   |          |         |         |   |         |         |          |   |          |         |          |   |          |         |         |   |          |         |         |   |          |         |         |   |          |         |          |   |          |         |          |   |          |         |          |   |          |         |          |   |          |         |          |   |          |         |         |   |          |         |         |   |          |         |         |   |          |         |          |   |          |         |         |   |         |         |         |                                                                                                                                                                                                                                                                                                                                                                                                                                                                                                                                                                                                                                                                                                                                                                                                                                                                                                                                                                                                                                                                                                                                                                                                                                                                                                                                                                                                                                                                                                                                                                                                                                                                                                                                                                                                                                                                                                                                                                                                                                                                                                                                                                                                                                                  |         |         |         |         |         |         |         |         |         |          |          |          |          |          |          |          |          |          |          |          |          |          |          |          |          |          |          |          |          |          |          |          |          |          |          |          |          |          |          |          |          |          |          |          |          |          |          |          |           |           |           |           |           |           |           |           |           |           |           |           |           |           |           |           |           |           |           |           |           |           |           |           |           |           |           |           |           |           |           |           |           |           |           |           |           |           |           |           |           |           |           |           |           |           |           |           |           |           |           |
| 383.6452         | 406.6350                                                                                                                                                                                                                                                                                                                                                                                                                                                                                                                                                                                                                                                                                                                                                                                                                                                                                                                                                                                                                                                                                                                                                                                                                                                                                                                                                                                                                                                                                                                                                                                                                                                                                                                                                                                                                                                                                                                                                                                                                                                                                                                                                                                                                                                                                                                                                                                                                                                                                                                                                                                                                                                          | 457.9996           |          |   |   |   |         |          |          |   |         |         |          |    |         |          |          |    |         |         |         |    |          |          |          |   |         |         |          |   |         |         |          |   |         |          |          |   |         |          |          |    |         |          |         |    |          |          |          |   |          |          |         |   |          |          |         |   |          |          |         |   |          |          |         |   |          |          |         |   |          |          |         |   |          |         |         |   |         |         |          |   |          |         |          |   |          |         |         |   |          |         |         |   |          |         |         |   |          |         |          |   |          |         |          |   |          |         |          |   |          |         |          |   |          |         |          |   |          |         |         |   |          |         |         |   |          |         |         |   |          |         |          |   |          |         |         |   |         |         |         |                                                                                                                                                                                                                                                                                                                                                                                                                                                                                                                                                                                                                                                                                                                                                                                                                                                                                                                                                                                                                                                                                                                                                                                                                                                                                                                                                                                                                                                                                                                                                                                                                                                                                                                                                                                                                                                                                                                                                                                                                                                                                                                                                                                                                                                  |         |         |         |         |         |         |         |         |         |          |          |          |          |          |          |          |          |          |          |          |          |          |          |          |          |          |          |          |          |          |          |          |          |          |          |          |          |          |          |          |          |          |          |          |          |          |          |          |           |           |           |           |           |           |           |           |           |           |           |           |           |           |           |           |           |           |           |           |           |           |           |           |           |           |           |           |           |           |           |           |           |           |           |           |           |           |           |           |           |           |           |           |           |           |           |           |           |           |           |
| 472.5404         | 506.8574                                                                                                                                                                                                                                                                                                                                                                                                                                                                                                                                                                                                                                                                                                                                                                                                                                                                                                                                                                                                                                                                                                                                                                                                                                                                                                                                                                                                                                                                                                                                                                                                                                                                                                                                                                                                                                                                                                                                                                                                                                                                                                                                                                                                                                                                                                                                                                                                                                                                                                                                                                                                                                                          | 560.4092           |          |   |   |   |         |          |          |   |         |         |          |    |         |          |          |    |         |         |         |    |          |          |          |   |         |         |          |   |         |         |          |   |         |          |          |   |         |          |          |    |         |          |         |    |          |          |          |   |          |          |         |   |          |          |         |   |          |          |         |   |          |          |         |   |          |          |         |   |          |          |         |   |          |         |         |   |         |         |          |   |          |         |          |   |          |         |         |   |          |         |         |   |          |         |         |   |          |         |          |   |          |         |          |   |          |         |          |   |          |         |          |   |          |         |          |   |          |         |         |   |          |         |         |   |          |         |         |   |          |         |          |   |          |         |         |   |         |         |         |                                                                                                                                                                                                                                                                                                                                                                                                                                                                                                                                                                                                                                                                                                                                                                                                                                                                                                                                                                                                                                                                                                                                                                                                                                                                                                                                                                                                                                                                                                                                                                                                                                                                                                                                                                                                                                                                                                                                                                                                                                                                                                                                                                                                                                                  |         |         |         |         |         |         |         |         |         |          |          |          |          |          |          |          |          |          |          |          |          |          |          |          |          |          |          |          |          |          |          |          |          |          |          |          |          |          |          |          |          |          |          |          |          |          |          |          |           |           |           |           |           |           |           |           |           |           |           |           |           |           |           |           |           |           |           |           |           |           |           |           |           |           |           |           |           |           |           |           |           |           |           |           |           |           |           |           |           |           |           |           |           |           |           |           |           |           |           |
| 576.0636         | 602.4747                                                                                                                                                                                                                                                                                                                                                                                                                                                                                                                                                                                                                                                                                                                                                                                                                                                                                                                                                                                                                                                                                                                                                                                                                                                                                                                                                                                                                                                                                                                                                                                                                                                                                                                                                                                                                                                                                                                                                                                                                                                                                                                                                                                                                                                                                                                                                                                                                                                                                                                                                                                                                                                          | 724.1800           |          |   |   |   |         |          |          |   |         |         |          |    |         |          |          |    |         |         |         |    |          |          |          |   |         |         |          |   |         |         |          |   |         |          |          |   |         |          |          |    |         |          |         |    |          |          |          |   |          |          |         |   |          |          |         |   |          |          |         |   |          |          |         |   |          |          |         |   |          |          |         |   |          |         |         |   |         |         |          |   |          |         |          |   |          |         |         |   |          |         |         |   |          |         |         |   |          |         |          |   |          |         |          |   |          |         |          |   |          |         |          |   |          |         |          |   |          |         |         |   |          |         |         |   |          |         |         |   |          |         |          |   |          |         |         |   |         |         |         |                                                                                                                                                                                                                                                                                                                                                                                                                                                                                                                                                                                                                                                                                                                                                                                                                                                                                                                                                                                                                                                                                                                                                                                                                                                                                                                                                                                                                                                                                                                                                                                                                                                                                                                                                                                                                                                                                                                                                                                                                                                                                                                                                                                                                                                  |         |         |         |         |         |         |         |         |         |          |          |          |          |          |          |          |          |          |          |          |          |          |          |          |          |          |          |          |          |          |          |          |          |          |          |          |          |          |          |          |          |          |          |          |          |          |          |          |           |           |           |           |           |           |           |           |           |           |           |           |           |           |           |           |           |           |           |           |           |           |           |           |           |           |           |           |           |           |           |           |           |           |           |           |           |           |           |           |           |           |           |           |           |           |           |           |           |           |           |
| 763.5559         | 821.2738                                                                                                                                                                                                                                                                                                                                                                                                                                                                                                                                                                                                                                                                                                                                                                                                                                                                                                                                                                                                                                                                                                                                                                                                                                                                                                                                                                                                                                                                                                                                                                                                                                                                                                                                                                                                                                                                                                                                                                                                                                                                                                                                                                                                                                                                                                                                                                                                                                                                                                                                                                                                                                                          | 840.0280           |          |   |   |   |         |          |          |   |         |         |          |    |         |          |          |    |         |         |         |    |          |          |          |   |         |         |          |   |         |         |          |   |         |          |          |   |         |          |          |    |         |          |         |    |          |          |          |   |          |          |         |   |          |          |         |   |          |          |         |   |          |          |         |   |          |          |         |   |          |          |         |   |          |         |         |   |         |         |          |   |          |         |          |   |          |         |         |   |          |         |         |   |          |         |         |   |          |         |          |   |          |         |          |   |          |         |          |   |          |         |          |   |          |         |          |   |          |         |         |   |          |         |         |   |          |         |         |   |          |         |          |   |          |         |         |   |         |         |         |                                                                                                                                                                                                                                                                                                                                                                                                                                                                                                                                                                                                                                                                                                                                                                                                                                                                                                                                                                                                                                                                                                                                                                                                                                                                                                                                                                                                                                                                                                                                                                                                                                                                                                                                                                                                                                                                                                                                                                                                                                                                                                                                                                                                                                                  |         |         |         |         |         |         |         |         |         |          |          |          |          |          |          |          |          |          |          |          |          |          |          |          |          |          |          |          |          |          |          |          |          |          |          |          |          |          |          |          |          |          |          |          |          |          |          |          |           |           |           |           |           |           |           |           |           |           |           |           |           |           |           |           |           |           |           |           |           |           |           |           |           |           |           |           |           |           |           |           |           |           |           |           |           |           |           |           |           |           |           |           |           |           |           |           |           |           |           |
| 844.6797         | 869.7726                                                                                                                                                                                                                                                                                                                                                                                                                                                                                                                                                                                                                                                                                                                                                                                                                                                                                                                                                                                                                                                                                                                                                                                                                                                                                                                                                                                                                                                                                                                                                                                                                                                                                                                                                                                                                                                                                                                                                                                                                                                                                                                                                                                                                                                                                                                                                                                                                                                                                                                                                                                                                                                          | 910.9420           |          |   |   |   |         |          |          |   |         |         |          |    |         |          |          |    |         |         |         |    |          |          |          |   |         |         |          |   |         |         |          |   |         |          |          |   |         |          |          |    |         |          |         |    |          |          |          |   |          |          |         |   |          |          |         |   |          |          |         |   |          |          |         |   |          |          |         |   |          |          |         |   |          |         |         |   |         |         |          |   |          |         |          |   |          |         |         |   |          |         |         |   |          |         |         |   |          |         |          |   |          |         |          |   |          |         |          |   |          |         |          |   |          |         |          |   |          |         |         |   |          |         |         |   |          |         |         |   |          |         |          |   |          |         |         |   |         |         |         |                                                                                                                                                                                                                                                                                                                                                                                                                                                                                                                                                                                                                                                                                                                                                                                                                                                                                                                                                                                                                                                                                                                                                                                                                                                                                                                                                                                                                                                                                                                                                                                                                                                                                                                                                                                                                                                                                                                                                                                                                                                                                                                                                                                                                                                  |         |         |         |         |         |         |         |         |         |          |          |          |          |          |          |          |          |          |          |          |          |          |          |          |          |          |          |          |          |          |          |          |          |          |          |          |          |          |          |          |          |          |          |          |          |          |          |          |           |           |           |           |           |           |           |           |           |           |           |           |           |           |           |           |           |           |           |           |           |           |           |           |           |           |           |           |           |           |           |           |           |           |           |           |           |           |           |           |           |           |           |           |           |           |           |           |           |           |           |
| 949.5984         | 956.6416                                                                                                                                                                                                                                                                                                                                                                                                                                                                                                                                                                                                                                                                                                                                                                                                                                                                                                                                                                                                                                                                                                                                                                                                                                                                                                                                                                                                                                                                                                                                                                                                                                                                                                                                                                                                                                                                                                                                                                                                                                                                                                                                                                                                                                                                                                                                                                                                                                                                                                                                                                                                                                                          | 995.2002           |          |   |   |   |         |          |          |   |         |         |          |    |         |          |          |    |         |         |         |    |          |          |          |   |         |         |          |   |         |         |          |   |         |          |          |   |         |          |          |    |         |          |         |    |          |          |          |   |          |          |         |   |          |          |         |   |          |          |         |   |          |          |         |   |          |          |         |   |          |          |         |   |          |         |         |   |         |         |          |   |          |         |          |   |          |         |         |   |          |         |         |   |          |         |         |   |          |         |          |   |          |         |          |   |          |         |          |   |          |         |          |   |          |         |          |   |          |         |         |   |          |         |         |   |          |         |         |   |          |         |          |   |          |         |         |   |         |         |         |                                                                                                                                                                                                                                                                                                                                                                                                                                                                                                                                                                                                                                                                                                                                                                                                                                                                                                                                                                                                                                                                                                                                                                                                                                                                                                                                                                                                                                                                                                                                                                                                                                                                                                                                                                                                                                                                                                                                                                                                                                                                                                                                                                                                                                                  |         |         |         |         |         |         |         |         |         |          |          |          |          |          |          |          |          |          |          |          |          |          |          |          |          |          |          |          |          |          |          |          |          |          |          |          |          |          |          |          |          |          |          |          |          |          |          |          |           |           |           |           |           |           |           |           |           |           |           |           |           |           |           |           |           |           |           |           |           |           |           |           |           |           |           |           |           |           |           |           |           |           |           |           |           |           |           |           |           |           |           |           |           |           |           |           |           |           |           |
| 1020.4740        | 1041.2379                                                                                                                                                                                                                                                                                                                                                                                                                                                                                                                                                                                                                                                                                                                                                                                                                                                                                                                                                                                                                                                                                                                                                                                                                                                                                                                                                                                                                                                                                                                                                                                                                                                                                                                                                                                                                                                                                                                                                                                                                                                                                                                                                                                                                                                                                                                                                                                                                                                                                                                                                                                                                                                         | 1053.7790          |          |   |   |   |         |          |          |   |         |         |          |    |         |          |          |    |         |         |         |    |          |          |          |   |         |         |          |   |         |         |          |   |         |          |          |   |         |          |          |    |         |          |         |    |          |          |          |   |          |          |         |   |          |          |         |   |          |          |         |   |          |          |         |   |          |          |         |   |          |          |         |   |          |         |         |   |         |         |          |   |          |         |          |   |          |         |         |   |          |         |         |   |          |         |         |   |          |         |          |   |          |         |          |   |          |         |          |   |          |         |          |   |          |         |          |   |          |         |         |   |          |         |         |   |          |         |         |   |          |         |          |   |          |         |         |   |         |         |         |                                                                                                                                                                                                                                                                                                                                                                                                                                                                                                                                                                                                                                                                                                                                                                                                                                                                                                                                                                                                                                                                                                                                                                                                                                                                                                                                                                                                                                                                                                                                                                                                                                                                                                                                                                                                                                                                                                                                                                                                                                                                                                                                                                                                                                                  |         |         |         |         |         |         |         |         |         |          |          |          |          |          |          |          |          |          |          |          |          |          |          |          |          |          |          |          |          |          |          |          |          |          |          |          |          |          |          |          |          |          |          |          |          |          |          |          |           |           |           |           |           |           |           |           |           |           |           |           |           |           |           |           |           |           |           |           |           |           |           |           |           |           |           |           |           |           |           |           |           |           |           |           |           |           |           |           |           |           |           |           |           |           |           |           |           |           |           |
| 1057.1521        | 1068.2033                                                                                                                                                                                                                                                                                                                                                                                                                                                                                                                                                                                                                                                                                                                                                                                                                                                                                                                                                                                                                                                                                                                                                                                                                                                                                                                                                                                                                                                                                                                                                                                                                                                                                                                                                                                                                                                                                                                                                                                                                                                                                                                                                                                                                                                                                                                                                                                                                                                                                                                                                                                                                                                         | 1069.6698          |          |   |   |   |         |          |          |   |         |         |          |    |         |          |          |    |         |         |         |    |          |          |          |   |         |         |          |   |         |         |          |   |         |          |          |   |         |          |          |    |         |          |         |    |          |          |          |   |          |          |         |   |          |          |         |   |          |          |         |   |          |          |         |   |          |          |         |   |          |          |         |   |          |         |         |   |         |         |          |   |          |         |          |   |          |         |         |   |          |         |         |   |          |         |         |   |          |         |          |   |          |         |          |   |          |         |          |   |          |         |          |   |          |         |          |   |          |         |         |   |          |         |         |   |          |         |         |   |          |         |          |   |          |         |         |   |         |         |         |                                                                                                                                                                                                                                                                                                                                                                                                                                                                                                                                                                                                                                                                                                                                                                                                                                                                                                                                                                                                                                                                                                                                                                                                                                                                                                                                                                                                                                                                                                                                                                                                                                                                                                                                                                                                                                                                                                                                                                                                                                                                                                                                                                                                                                                  |         |         |         |         |         |         |         |         |         |          |          |          |          |          |          |          |          |          |          |          |          |          |          |          |          |          |          |          |          |          |          |          |          |          |          |          |          |          |          |          |          |          |          |          |          |          |          |          |           |           |           |           |           |           |           |           |           |           |           |           |           |           |           |           |           |           |           |           |           |           |           |           |           |           |           |           |           |           |           |           |           |           |           |           |           |           |           |           |           |           |           |           |           |           |           |           |           |           |           |
| 1074.2097        | 1091.5129                                                                                                                                                                                                                                                                                                                                                                                                                                                                                                                                                                                                                                                                                                                                                                                                                                                                                                                                                                                                                                                                                                                                                                                                                                                                                                                                                                                                                                                                                                                                                                                                                                                                                                                                                                                                                                                                                                                                                                                                                                                                                                                                                                                                                                                                                                                                                                                                                                                                                                                                                                                                                                                         | 1163.6724          |          |   |   |   |         |          |          |   |         |         |          |    |         |          |          |    |         |         |         |    |          |          |          |   |         |         |          |   |         |         |          |   |         |          |          |   |         |          |          |    |         |          |         |    |          |          |          |   |          |          |         |   |          |          |         |   |          |          |         |   |          |          |         |   |          |          |         |   |          |          |         |   |          |         |         |   |         |         |          |   |          |         |          |   |          |         |         |   |          |         |         |   |          |         |         |   |          |         |          |   |          |         |          |   |          |         |          |   |          |         |          |   |          |         |          |   |          |         |         |   |          |         |         |   |          |         |         |   |          |         |          |   |          |         |         |   |         |         |         |                                                                                                                                                                                                                                                                                                                                                                                                                                                                                                                                                                                                                                                                                                                                                                                                                                                                                                                                                                                                                                                                                                                                                                                                                                                                                                                                                                                                                                                                                                                                                                                                                                                                                                                                                                                                                                                                                                                                                                                                                                                                                                                                                                                                                                                  |         |         |         |         |         |         |         |         |         |          |          |          |          |          |          |          |          |          |          |          |          |          |          |          |          |          |          |          |          |          |          |          |          |          |          |          |          |          |          |          |          |          |          |          |          |          |          |          |           |           |           |           |           |           |           |           |           |           |           |           |           |           |           |           |           |           |           |           |           |           |           |           |           |           |           |           |           |           |           |           |           |           |           |           |           |           |           |           |           |           |           |           |           |           |           |           |           |           |           |
| 1188.1968        | 1192.2543                                                                                                                                                                                                                                                                                                                                                                                                                                                                                                                                                                                                                                                                                                                                                                                                                                                                                                                                                                                                                                                                                                                                                                                                                                                                                                                                                                                                                                                                                                                                                                                                                                                                                                                                                                                                                                                                                                                                                                                                                                                                                                                                                                                                                                                                                                                                                                                                                                                                                                                                                                                                                                                         | 1213.7327          |          |   |   |   |         |          |          |   |         |         |          |    |         |          |          |    |         |         |         |    |          |          |          |   |         |         |          |   |         |         |          |   |         |          |          |   |         |          |          |    |         |          |         |    |          |          |          |   |          |          |         |   |          |          |         |   |          |          |         |   |          |          |         |   |          |          |         |   |          |          |         |   |          |         |         |   |         |         |          |   |          |         |          |   |          |         |         |   |          |         |         |   |          |         |         |   |          |         |          |   |          |         |          |   |          |         |          |   |          |         |          |   |          |         |          |   |          |         |         |   |          |         |         |   |          |         |         |   |          |         |          |   |          |         |         |   |         |         |         |                                                                                                                                                                                                                                                                                                                                                                                                                                                                                                                                                                                                                                                                                                                                                                                                                                                                                                                                                                                                                                                                                                                                                                                                                                                                                                                                                                                                                                                                                                                                                                                                                                                                                                                                                                                                                                                                                                                                                                                                                                                                                                                                                                                                                                                  |         |         |         |         |         |         |         |         |         |          |          |          |          |          |          |          |          |          |          |          |          |          |          |          |          |          |          |          |          |          |          |          |          |          |          |          |          |          |          |          |          |          |          |          |          |          |          |          |           |           |           |           |           |           |           |           |           |           |           |           |           |           |           |           |           |           |           |           |           |           |           |           |           |           |           |           |           |           |           |           |           |           |           |           |           |           |           |           |           |           |           |           |           |           |           |           |           |           |           |
| 1225.2066        | 1241.6008                                                                                                                                                                                                                                                                                                                                                                                                                                                                                                                                                                                                                                                                                                                                                                                                                                                                                                                                                                                                                                                                                                                                                                                                                                                                                                                                                                                                                                                                                                                                                                                                                                                                                                                                                                                                                                                                                                                                                                                                                                                                                                                                                                                                                                                                                                                                                                                                                                                                                                                                                                                                                                                         | 1247.9106          |          |   |   |   |         |          |          |   |         |         |          |    |         |          |          |    |         |         |         |    |          |          |          |   |         |         |          |   |         |         |          |   |         |          |          |   |         |          |          |    |         |          |         |    |          |          |          |   |          |          |         |   |          |          |         |   |          |          |         |   |          |          |         |   |          |          |         |   |          |          |         |   |          |         |         |   |         |         |          |   |          |         |          |   |          |         |         |   |          |         |         |   |          |         |         |   |          |         |          |   |          |         |          |   |          |         |          |   |          |         |          |   |          |         |          |   |          |         |         |   |          |         |         |   |          |         |         |   |          |         |          |   |          |         |         |   |         |         |         |                                                                                                                                                                                                                                                                                                                                                                                                                                                                                                                                                                                                                                                                                                                                                                                                                                                                                                                                                                                                                                                                                                                                                                                                                                                                                                                                                                                                                                                                                                                                                                                                                                                                                                                                                                                                                                                                                                                                                                                                                                                                                                                                                                                                                                                  |         |         |         |         |         |         |         |         |         |          |          |          |          |          |          |          |          |          |          |          |          |          |          |          |          |          |          |          |          |          |          |          |          |          |          |          |          |          |          |          |          |          |          |          |          |          |          |          |           |           |           |           |           |           |           |           |           |           |           |           |           |           |           |           |           |           |           |           |           |           |           |           |           |           |           |           |           |           |           |           |           |           |           |           |           |           |           |           |           |           |           |           |           |           |           |           |           |           |           |
| 1291.3912        | 1298.5719                                                                                                                                                                                                                                                                                                                                                                                                                                                                                                                                                                                                                                                                                                                                                                                                                                                                                                                                                                                                                                                                                                                                                                                                                                                                                                                                                                                                                                                                                                                                                                                                                                                                                                                                                                                                                                                                                                                                                                                                                                                                                                                                                                                                                                                                                                                                                                                                                                                                                                                                                                                                                                                         | 1306.3436          |          |   |   |   |         |          |          |   |         |         |          |    |         |          |          |    |         |         |         |    |          |          |          |   |         |         |          |   |         |         |          |   |         |          |          |   |         |          |          |    |         |          |         |    |          |          |          |   |          |          |         |   |          |          |         |   |          |          |         |   |          |          |         |   |          |          |         |   |          |          |         |   |          |         |         |   |         |         |          |   |          |         |          |   |          |         |         |   |          |         |         |   |          |         |         |   |          |         |          |   |          |         |          |   |          |         |          |   |          |         |          |   |          |         |          |   |          |         |         |   |          |         |         |   |          |         |         |   |          |         |          |   |          |         |         |   |         |         |         |                                                                                                                                                                                                                                                                                                                                                                                                                                                                                                                                                                                                                                                                                                                                                                                                                                                                                                                                                                                                                                                                                                                                                                                                                                                                                                                                                                                                                                                                                                                                                                                                                                                                                                                                                                                                                                                                                                                                                                                                                                                                                                                                                                                                                                                  |         |         |         |         |         |         |         |         |         |          |          |          |          |          |          |          |          |          |          |          |          |          |          |          |          |          |          |          |          |          |          |          |          |          |          |          |          |          |          |          |          |          |          |          |          |          |          |          |           |           |           |           |           |           |           |           |           |           |           |           |           |           |           |           |           |           |           |           |           |           |           |           |           |           |           |           |           |           |           |           |           |           |           |           |           |           |           |           |           |           |           |           |           |           |           |           |           |           |           |
| 1319.9268        | 1350.1518                                                                                                                                                                                                                                                                                                                                                                                                                                                                                                                                                                                                                                                                                                                                                                                                                                                                                                                                                                                                                                                                                                                                                                                                                                                                                                                                                                                                                                                                                                                                                                                                                                                                                                                                                                                                                                                                                                                                                                                                                                                                                                                                                                                                                                                                                                                                                                                                                                                                                                                                                                                                                                                         | 1371.8265          |          |   |   |   |         |          |          |   |         |         |          |    |         |          |          |    |         |         |         |    |          |          |          |   |         |         |          |   |         |         |          |   |         |          |          |   |         |          |          |    |         |          |         |    |          |          |          |   |          |          |         |   |          |          |         |   |          |          |         |   |          |          |         |   |          |          |         |   |          |          |         |   |          |         |         |   |         |         |          |   |          |         |          |   |          |         |         |   |          |         |         |   |          |         |         |   |          |         |          |   |          |         |          |   |          |         |          |   |          |         |          |   |          |         |          |   |          |         |         |   |          |         |         |   |          |         |         |   |          |         |          |   |          |         |         |   |         |         |         |                                                                                                                                                                                                                                                                                                                                                                                                                                                                                                                                                                                                                                                                                                                                                                                                                                                                                                                                                                                                                                                                                                                                                                                                                                                                                                                                                                                                                                                                                                                                                                                                                                                                                                                                                                                                                                                                                                                                                                                                                                                                                                                                                                                                                                                  |         |         |         |         |         |         |         |         |         |          |          |          |          |          |          |          |          |          |          |          |          |          |          |          |          |          |          |          |          |          |          |          |          |          |          |          |          |          |          |          |          |          |          |          |          |          |          |          |           |           |           |           |           |           |           |           |           |           |           |           |           |           |           |           |           |           |           |           |           |           |           |           |           |           |           |           |           |           |           |           |           |           |           |           |           |           |           |           |           |           |           |           |           |           |           |           |           |           |           |
| 1380.0046        | 1424.5897                                                                                                                                                                                                                                                                                                                                                                                                                                                                                                                                                                                                                                                                                                                                                                                                                                                                                                                                                                                                                                                                                                                                                                                                                                                                                                                                                                                                                                                                                                                                                                                                                                                                                                                                                                                                                                                                                                                                                                                                                                                                                                                                                                                                                                                                                                                                                                                                                                                                                                                                                                                                                                                         | 1455.7959          |          |   |   |   |         |          |          |   |         |         |          |    |         |          |          |    |         |         |         |    |          |          |          |   |         |         |          |   |         |         |          |   |         |          |          |   |         |          |          |    |         |          |         |    |          |          |          |   |          |          |         |   |          |          |         |   |          |          |         |   |          |          |         |   |          |          |         |   |          |          |         |   |          |         |         |   |         |         |          |   |          |         |          |   |          |         |         |   |          |         |         |   |          |         |         |   |          |         |          |   |          |         |          |   |          |         |          |   |          |         |          |   |          |         |          |   |          |         |         |   |          |         |         |   |          |         |         |   |          |         |          |   |          |         |         |   |         |         |         |                                                                                                                                                                                                                                                                                                                                                                                                                                                                                                                                                                                                                                                                                                                                                                                                                                                                                                                                                                                                                                                                                                                                                                                                                                                                                                                                                                                                                                                                                                                                                                                                                                                                                                                                                                                                                                                                                                                                                                                                                                                                                                                                                                                                                                                  |         |         |         |         |         |         |         |         |         |          |          |          |          |          |          |          |          |          |          |          |          |          |          |          |          |          |          |          |          |          |          |          |          |          |          |          |          |          |          |          |          |          |          |          |          |          |          |          |           |           |           |           |           |           |           |           |           |           |           |           |           |           |           |           |           |           |           |           |           |           |           |           |           |           |           |           |           |           |           |           |           |           |           |           |           |           |           |           |           |           |           |           |           |           |           |           |           |           |           |
| 1470.9436        | 1479.1104                                                                                                                                                                                                                                                                                                                                                                                                                                                                                                                                                                                                                                                                                                                                                                                                                                                                                                                                                                                                                                                                                                                                                                                                                                                                                                                                                                                                                                                                                                                                                                                                                                                                                                                                                                                                                                                                                                                                                                                                                                                                                                                                                                                                                                                                                                                                                                                                                                                                                                                                                                                                                                                         | 1500.6893          |          |   |   |   |         |          |          |   |         |         |          |    |         |          |          |    |         |         |         |    |          |          |          |   |         |         |          |   |         |         |          |   |         |          |          |   |         |          |          |    |         |          |         |    |          |          |          |   |          |          |         |   |          |          |         |   |          |          |         |   |          |          |         |   |          |          |         |   |          |          |         |   |          |         |         |   |         |         |          |   |          |         |          |   |          |         |         |   |          |         |         |   |          |         |         |   |          |         |          |   |          |         |          |   |          |         |          |   |          |         |          |   |          |         |          |   |          |         |         |   |          |         |         |   |          |         |         |   |          |         |          |   |          |         |         |   |         |         |         |                                                                                                                                                                                                                                                                                                                                                                                                                                                                                                                                                                                                                                                                                                                                                                                                                                                                                                                                                                                                                                                                                                                                                                                                                                                                                                                                                                                                                                                                                                                                                                                                                                                                                                                                                                                                                                                                                                                                                                                                                                                                                                                                                                                                                                                  |         |         |         |         |         |         |         |         |         |          |          |          |          |          |          |          |          |          |          |          |          |          |          |          |          |          |          |          |          |          |          |          |          |          |          |          |          |          |          |          |          |          |          |          |          |          |          |          |           |           |           |           |           |           |           |           |           |           |           |           |           |           |           |           |           |           |           |           |           |           |           |           |           |           |           |           |           |           |           |           |           |           |           |           |           |           |           |           |           |           |           |           |           |           |           |           |           |           |           |
| 1503.9735        | 1505.7591                                                                                                                                                                                                                                                                                                                                                                                                                                                                                                                                                                                                                                                                                                                                                                                                                                                                                                                                                                                                                                                                                                                                                                                                                                                                                                                                                                                                                                                                                                                                                                                                                                                                                                                                                                                                                                                                                                                                                                                                                                                                                                                                                                                                                                                                                                                                                                                                                                                                                                                                                                                                                                                         | 1518.7430          |          |   |   |   |         |          |          |   |         |         |          |    |         |          |          |    |         |         |         |    |          |          |          |   |         |         |          |   |         |         |          |   |         |          |          |   |         |          |          |    |         |          |         |    |          |          |          |   |          |          |         |   |          |          |         |   |          |          |         |   |          |          |         |   |          |          |         |   |          |          |         |   |          |         |         |   |         |         |          |   |          |         |          |   |          |         |         |   |          |         |         |   |          |         |         |   |          |         |          |   |          |         |          |   |          |         |          |   |          |         |          |   |          |         |          |   |          |         |         |   |          |         |         |   |          |         |         |   |          |         |          |   |          |         |         |   |         |         |         |                                                                                                                                                                                                                                                                                                                                                                                                                                                                                                                                                                                                                                                                                                                                                                                                                                                                                                                                                                                                                                                                                                                                                                                                                                                                                                                                                                                                                                                                                                                                                                                                                                                                                                                                                                                                                                                                                                                                                                                                                                                                                                                                                                                                                                                  |         |         |         |         |         |         |         |         |         |          |          |          |          |          |          |          |          |          |          |          |          |          |          |          |          |          |          |          |          |          |          |          |          |          |          |          |          |          |          |          |          |          |          |          |          |          |          |          |           |           |           |           |           |           |           |           |           |           |           |           |           |           |           |           |           |           |           |           |           |           |           |           |           |           |           |           |           |           |           |           |           |           |           |           |           |           |           |           |           |           |           |           |           |           |           |           |           |           |           |
| 1577.6483        | 1656.9179                                                                                                                                                                                                                                                                                                                                                                                                                                                                                                                                                                                                                                                                                                                                                                                                                                                                                                                                                                                                                                                                                                                                                                                                                                                                                                                                                                                                                                                                                                                                                                                                                                                                                                                                                                                                                                                                                                                                                                                                                                                                                                                                                                                                                                                                                                                                                                                                                                                                                                                                                                                                                                                         | 1886.9452          |          |   |   |   |         |          |          |   |         |         |          |    |         |          |          |    |         |         |         |    |          |          |          |   |         |         |          |   |         |         |          |   |         |          |          |   |         |          |          |    |         |          |         |    |          |          |          |   |          |          |         |   |          |          |         |   |          |          |         |   |          |          |         |   |          |          |         |   |          |          |         |   |          |         |         |   |         |         |          |   |          |         |          |   |          |         |         |   |          |         |         |   |          |         |         |   |          |         |          |   |          |         |          |   |          |         |          |   |          |         |          |   |          |         |          |   |          |         |         |   |          |         |         |   |          |         |         |   |          |         |          |   |          |         |         |   |         |         |         |                                                                                                                                                                                                                                                                                                                                                                                                                                                                                                                                                                                                                                                                                                                                                                                                                                                                                                                                                                                                                                                                                                                                                                                                                                                                                                                                                                                                                                                                                                                                                                                                                                                                                                                                                                                                                                                                                                                                                                                                                                                                                                                                                                                                                                                  |         |         |         |         |         |         |         |         |         |          |          |          |          |          |          |          |          |          |          |          |          |          |          |          |          |          |          |          |          |          |          |          |          |          |          |          |          |          |          |          |          |          |          |          |          |          |          |          |           |           |           |           |           |           |           |           |           |           |           |           |           |           |           |           |           |           |           |           |           |           |           |           |           |           |           |           |           |           |           |           |           |           |           |           |           |           |           |           |           |           |           |           |           |           |           |           |           |           |           |
| 3027.9913        | 3070.9134                                                                                                                                                                                                                                                                                                                                                                                                                                                                                                                                                                                                                                                                                                                                                                                                                                                                                                                                                                                                                                                                                                                                                                                                                                                                                                                                                                                                                                                                                                                                                                                                                                                                                                                                                                                                                                                                                                                                                                                                                                                                                                                                                                                                                                                                                                                                                                                                                                                                                                                                                                                                                                                         | 3073.0549          |          |   |   |   |         |          |          |   |         |         |          |    |         |          |          |    |         |         |         |    |          |          |          |   |         |         |          |   |         |         |          |   |         |          |          |   |         |          |          |    |         |          |         |    |          |          |          |   |          |          |         |   |          |          |         |   |          |          |         |   |          |          |         |   |          |          |         |   |          |          |         |   |          |         |         |   |         |         |          |   |          |         |          |   |          |         |         |   |          |         |         |   |          |         |         |   |          |         |          |   |          |         |          |   |          |         |          |   |          |         |          |   |          |         |          |   |          |         |         |   |          |         |         |   |          |         |         |   |          |         |          |   |          |         |         |   |         |         |         |                                                                                                                                                                                                                                                                                                                                                                                                                                                                                                                                                                                                                                                                                                                                                                                                                                                                                                                                                                                                                                                                                                                                                                                                                                                                                                                                                                                                                                                                                                                                                                                                                                                                                                                                                                                                                                                                                                                                                                                                                                                                                                                                                                                                                                                  |         |         |         |         |         |         |         |         |         |          |          |          |          |          |          |          |          |          |          |          |          |          |          |          |          |          |          |          |          |          |          |          |          |          |          |          |          |          |          |          |          |          |          |          |          |          |          |          |           |           |           |           |           |           |           |           |           |           |           |           |           |           |           |           |           |           |           |           |           |           |           |           |           |           |           |           |           |           |           |           |           |           |           |           |           |           |           |           |           |           |           |           |           |           |           |           |           |           |           |
| 3083.6200        | 3095.9632                                                                                                                                                                                                                                                                                                                                                                                                                                                                                                                                                                                                                                                                                                                                                                                                                                                                                                                                                                                                                                                                                                                                                                                                                                                                                                                                                                                                                                                                                                                                                                                                                                                                                                                                                                                                                                                                                                                                                                                                                                                                                                                                                                                                                                                                                                                                                                                                                                                                                                                                                                                                                                                         | 3129.5923          |          |   |   |   |         |          |          |   |         |         |          |    |         |          |          |    |         |         |         |    |          |          |          |   |         |         |          |   |         |         |          |   |         |          |          |   |         |          |          |    |         |          |         |    |          |          |          |   |          |          |         |   |          |          |         |   |          |          |         |   |          |          |         |   |          |          |         |   |          |          |         |   |          |         |         |   |         |         |          |   |          |         |          |   |          |         |         |   |          |         |         |   |          |         |         |   |          |         |          |   |          |         |          |   |          |         |          |   |          |         |          |   |          |         |          |   |          |         |         |   |          |         |         |   |          |         |         |   |          |         |          |   |          |         |         |   |         |         |         |                                                                                                                                                                                                                                                                                                                                                                                                                                                                                                                                                                                                                                                                                                                                                                                                                                                                                                                                                                                                                                                                                                                                                                                                                                                                                                                                                                                                                                                                                                                                                                                                                                                                                                                                                                                                                                                                                                                                                                                                                                                                                                                                                                                                                                                  |         |         |         |         |         |         |         |         |         |          |          |          |          |          |          |          |          |          |          |          |          |          |          |          |          |          |          |          |          |          |          |          |          |          |          |          |          |          |          |          |          |          |          |          |          |          |          |          |           |           |           |           |           |           |           |           |           |           |           |           |           |           |           |           |           |           |           |           |           |           |           |           |           |           |           |           |           |           |           |           |           |           |           |           |           |           |           |           |           |           |           |           |           |           |           |           |           |           |           |
| 3135.0017        | 3148.7815                                                                                                                                                                                                                                                                                                                                                                                                                                                                                                                                                                                                                                                                                                                                                                                                                                                                                                                                                                                                                                                                                                                                                                                                                                                                                                                                                                                                                                                                                                                                                                                                                                                                                                                                                                                                                                                                                                                                                                                                                                                                                                                                                                                                                                                                                                                                                                                                                                                                                                                                                                                                                                                         | 3156.8815          |          |   |   |   |         |          |          |   |         |         |          |    |         |          |          |    |         |         |         |    |          |          |          |   |         |         |          |   |         |         |          |   |         |          |          |   |         |          |          |    |         |          |         |    |          |          |          |   |          |          |         |   |          |          |         |   |          |          |         |   |          |          |         |   |          |          |         |   |          |          |         |   |          |         |         |   |         |         |          |   |          |         |          |   |          |         |         |   |          |         |         |   |          |         |         |   |          |         |          |   |          |         |          |   |          |         |          |   |          |         |          |   |          |         |          |   |          |         |         |   |          |         |         |   |          |         |         |   |          |         |          |   |          |         |         |   |         |         |         |                                                                                                                                                                                                                                                                                                                                                                                                                                                                                                                                                                                                                                                                                                                                                                                                                                                                                                                                                                                                                                                                                                                                                                                                                                                                                                                                                                                                                                                                                                                                                                                                                                                                                                                                                                                                                                                                                                                                                                                                                                                                                                                                                                                                                                                  |         |         |         |         |         |         |         |         |         |          |          |          |          |          |          |          |          |          |          |          |          |          |          |          |          |          |          |          |          |          |          |          |          |          |          |          |          |          |          |          |          |          |          |          |          |          |          |          |           |           |           |           |           |           |           |           |           |           |           |           |           |           |           |           |           |           |           |           |           |           |           |           |           |           |           |           |           |           |           |           |           |           |           |           |           |           |           |           |           |           |           |           |           |           |           |           |           |           |           |
| 3163.7491        | 3169.8212                                                                                                                                                                                                                                                                                                                                                                                                                                                                                                                                                                                                                                                                                                                                                                                                                                                                                                                                                                                                                                                                                                                                                                                                                                                                                                                                                                                                                                                                                                                                                                                                                                                                                                                                                                                                                                                                                                                                                                                                                                                                                                                                                                                                                                                                                                                                                                                                                                                                                                                                                                                                                                                         | 3180.8631          |          |   |   |   |         |          |          |   |         |         |          |    |         |          |          |    |         |         |         |    |          |          |          |   |         |         |          |   |         |         |          |   |         |          |          |   |         |          |          |    |         |          |         |    |          |          |          |   |          |          |         |   |          |          |         |   |          |          |         |   |          |          |         |   |          |          |         |   |          |          |         |   |          |         |         |   |         |         |          |   |          |         |          |   |          |         |         |   |          |         |         |   |          |         |         |   |          |         |          |   |          |         |          |   |          |         |          |   |          |         |          |   |          |         |          |   |          |         |         |   |          |         |         |   |          |         |         |   |          |         |          |   |          |         |         |   |         |         |         |                                                                                                                                                                                                                                                                                                                                                                                                                                                                                                                                                                                                                                                                                                                                                                                                                                                                                                                                                                                                                                                                                                                                                                                                                                                                                                                                                                                                                                                                                                                                                                                                                                                                                                                                                                                                                                                                                                                                                                                                                                                                                                                                                                                                                                                  |         |         |         |         |         |         |         |         |         |          |          |          |          |          |          |          |          |          |          |          |          |          |          |          |          |          |          |          |          |          |          |          |          |          |          |          |          |          |          |          |          |          |          |          |          |          |          |          |           |           |           |           |           |           |           |           |           |           |           |           |           |           |           |           |           |           |           |           |           |           |           |           |           |           |           |           |           |           |           |           |           |           |           |           |           |           |           |           |           |           |           |           |           |           |           |           |           |           |           |
| 3187.8479        | 3188.2001                                                                                                                                                                                                                                                                                                                                                                                                                                                                                                                                                                                                                                                                                                                                                                                                                                                                                                                                                                                                                                                                                                                                                                                                                                                                                                                                                                                                                                                                                                                                                                                                                                                                                                                                                                                                                                                                                                                                                                                                                                                                                                                                                                                                                                                                                                                                                                                                                                                                                                                                                                                                                                                         | 3268.1530          |          |   |   |   |         |          |          |   |         |         |          |    |         |          |          |    |         |         |         |    |          |          |          |   |         |         |          |   |         |         |          |   |         |          |          |   |         |          |          |    |         |          |         |    |          |          |          |   |          |          |         |   |          |          |         |   |          |          |         |   |          |          |         |   |          |          |         |   |          |          |         |   |          |         |         |   |         |         |          |   |          |         |          |   |          |         |         |   |          |         |         |   |          |         |         |   |          |         |          |   |          |         |          |   |          |         |          |   |          |         |          |   |          |         |          |   |          |         |         |   |          |         |         |   |          |         |         |   |          |         |          |   |          |         |         |   |         |         |         |                                                                                                                                                                                                                                                                                                                                                                                                                                                                                                                                                                                                                                                                                                                                                                                                                                                                                                                                                                                                                                                                                                                                                                                                                                                                                                                                                                                                                                                                                                                                                                                                                                                                                                                                                                                                                                                                                                                                                                                                                                                                                                                                                                                                                                                  |         |         |         |         |         |         |         |         |         |          |          |          |          |          |          |          |          |          |          |          |          |          |          |          |          |          |          |          |          |          |          |          |          |          |          |          |          |          |          |          |          |          |          |          |          |          |          |          |           |           |           |           |           |           |           |           |           |           |           |           |           |           |           |           |           |           |           |           |           |           |           |           |           |           |           |           |           |           |           |           |           |           |           |           |           |           |           |           |           |           |           |           |           |           |           |           |           |           |           |
| 3280.6991        | 3291.9904                                                                                                                                                                                                                                                                                                                                                                                                                                                                                                                                                                                                                                                                                                                                                                                                                                                                                                                                                                                                                                                                                                                                                                                                                                                                                                                                                                                                                                                                                                                                                                                                                                                                                                                                                                                                                                                                                                                                                                                                                                                                                                                                                                                                                                                                                                                                                                                                                                                                                                                                                                                                                                                         | 3299.2011          |          |   |   |   |         |          |          |   |         |         |          |    |         |          |          |    |         |         |         |    |          |          |          |   |         |         |          |   |         |         |          |   |         |          |          |   |         |          |          |    |         |          |         |    |          |          |          |   |          |          |         |   |          |          |         |   |          |          |         |   |          |          |         |   |          |          |         |   |          |          |         |   |          |         |         |   |         |         |          |   |          |         |          |   |          |         |         |   |          |         |         |   |          |         |         |   |          |         |          |   |          |         |          |   |          |         |          |   |          |         |          |   |          |         |          |   |          |         |         |   |          |         |         |   |          |         |         |   |          |         |          |   |          |         |         |   |         |         |         |                                                                                                                                                                                                                                                                                                                                                                                                                                                                                                                                                                                                                                                                                                                                                                                                                                                                                                                                                                                                                                                                                                                                                                                                                                                                                                                                                                                                                                                                                                                                                                                                                                                                                                                                                                                                                                                                                                                                                                                                                                                                                                                                                                                                                                                  |         |         |         |         |         |         |         |         |         |          |          |          |          |          |          |          |          |          |          |          |          |          |          |          |          |          |          |          |          |          |          |          |          |          |          |          |          |          |          |          |          |          |          |          |          |          |          |          |           |           |           |           |           |           |           |           |           |           |           |           |           |           |           |           |           |           |           |           |           |           |           |           |           |           |           |           |           |           |           |           |           |           |           |           |           |           |           |           |           |           |           |           |           |           |           |           |           |           |           |

|                                                  |          |          |                                               |  |
|--------------------------------------------------|----------|----------|-----------------------------------------------|--|
| Ni                                               | -1.61614 | -1.27287 | 0.01116                                       |  |
| <b><u>Statistical Thermodynamic Analysis</u></b> |          |          |                                               |  |
| Temperature=298.15 K                             |          |          | Pressure=1 atm                                |  |
| Zero-point correction= 0.268749                  |          |          | Electronic Energy = -2596.02273361            |  |
| Internal Energy (E)= -2595.72946261              |          |          | Enthalpy (H)= -2595.72851861                  |  |
| Gibbs Free Energy (G)=-2595.81122261             |          |          | Gibbs Free Energy of Solvation=-2595.82791189 |  |



| St.Pt.                                           | General Structure                                                                 | Ball & Stick model                                                                 |                                               |           |           |           |
|--------------------------------------------------|-----------------------------------------------------------------------------------|------------------------------------------------------------------------------------|-----------------------------------------------|-----------|-----------|-----------|
| 2                                                | 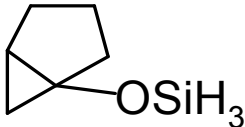 |  |                                               |           |           |           |
| <b><u>Cartesian co-ordinate</u></b>              |                                                                                   | <b><u>Frequencies</u></b>                                                          |                                               |           |           |           |
| -----<br>Atoms                                   | X                                                                                 | Y                                                                                  | Z                                             |           |           |           |
| -----                                            |                                                                                   |                                                                                    |                                               |           |           |           |
| C                                                | -0.82387                                                                          | 0.80406                                                                            | 0.78579                                       | 50.5800   | 108.4467  | 135.7920  |
| O                                                | 1.29653                                                                           | 0.53614                                                                            | -0.59065                                      | 235.1995  | 243.7345  | 357.1364  |
| C                                                | -0.08031                                                                          | 0.34785                                                                            | -0.44333                                      | 398.2266  | 458.8385  | 516.8303  |
| C                                                | -0.93806                                                                          | 1.56537                                                                            | -0.51870                                      | 613.6786  | 671.2735  | 721.3358  |
| H                                                | -1.86685                                                                          | 1.54693                                                                            | -1.08105                                      | 761.8710  | 820.9888  | 826.5272  |
| H                                                | -0.39233                                                                          | 2.50072                                                                            | -0.56261                                      | 870.7087  | 895.2086  | 919.7705  |
| C                                                | -0.67963                                                                          | -0.97251                                                                           | -0.89477                                      | 956.9564  | 979.9959  | 985.1784  |
| H                                                | -0.72335                                                                          | -1.07012                                                                           | -1.98352                                      | 991.1530  | 997.6362  | 1009.1378 |
| C                                                | -2.06462                                                                          | -1.00980                                                                           | -0.22626                                      | 1020.0213 | 1055.5780 | 1072.0578 |
| H                                                | -2.79922                                                                          | -0.51298                                                                           | -0.86677                                      | 1119.2736 | 1129.0063 | 1188.4395 |
| H                                                | -2.42288                                                                          | -2.02861                                                                           | -0.06342                                      | 1214.6074 | 1267.2868 | 1278.6625 |
| C                                                | -1.89683                                                                          | -0.22419                                                                           | 1.09259                                       | 1302.3936 | 1347.3555 | 1356.5718 |
| H                                                | -2.84006                                                                          | 0.21609                                                                            | 1.43070                                       | 1368.9609 | 1416.2538 | 1497.3544 |
| H                                                | -1.53818                                                                          | -0.88915                                                                           | 1.88701                                       | 1502.2798 | 1508.6772 | 1530.3504 |
| H                                                | -0.05079                                                                          | -1.78840                                                                           | -0.51358                                      | 2239.2261 | 2242.6140 | 2289.2514 |
| H                                                | -0.28956                                                                          | 1.28703                                                                            | 1.59732                                       | 3053.5143 | 3068.6937 | 3090.8192 |
| H                                                | 3.66826                                                                           | 0.37054                                                                            | 0.23624                                       | 3120.0301 | 3126.5413 | 3145.0497 |
| H                                                | 1.91830                                                                           | -0.43706                                                                           | 1.72063                                       | 3159.0805 | 3216.2177 | 3254.5058 |
| H                                                | 2.55476                                                                           | -1.72213                                                                           | -0.21136                                      |           |           |           |
| Si                                               | 2.37926                                                                           | -0.34476                                                                           | 0.31169                                       |           |           |           |
| <b><u>Statistical Thermodynamic Analysis</u></b> |                                                                                   |                                                                                    |                                               |           |           |           |
| Temperature=298.15 K                             |                                                                                   |                                                                                    | Pressure=1 atm                                |           |           |           |
| Zero-point correction= 0.167917                  |                                                                                   |                                                                                    | Electronic Energy = -600.400552085            |           |           |           |
| Internal Energy (E)= -600.224173085              |                                                                                   |                                                                                    | Enthalpy (H)= -600.223229085                  |           |           |           |
| Gibbs Free Energy (G)=-600.266249085             |                                                                                   |                                                                                    | Gibbs Free Energy of Solvation=-600.268488721 |           |           |           |

| St.Pt.                                                                                                                                                                                                                                                                                                                                                                                                                                                             | General Structure                                                                                                                                                                                                                                                                                                                                                                                                                                                                                                                                                                                                                                                                                                                                                                                                                                                                                                                                                                                                                                                                                                                                                                                                                                                                                                                                                                                                                                                                                                                                                                                                                                   | Ball & Stick model |                      |                |                                 |                                    |                                     |                              |                                      |                                               |          |          |         |    |          |          |          |    |          |         |         |    |         |          |          |   |          |          |         |   |          |          |         |   |          |          |          |   |          |          |          |    |         |          |         |    |         |         |          |   |         |         |         |   |         |         |         |   |         |         |          |   |         |         |         |   |         |         |          |   |         |         |          |   |         |         |          |   |         |          |          |    |         |          |         |                                                                                                                                                                                                                                                                                                                                                                                                                                                                                                                                                                                                                                                                                                                                                                                                                                                                                                                                                                                                                                                                                                                                            |         |         |         |         |         |          |          |          |          |          |          |          |          |          |          |          |          |          |          |          |          |          |          |          |          |          |           |           |           |           |           |           |           |           |           |           |           |           |           |           |           |           |           |           |           |           |           |           |
|--------------------------------------------------------------------------------------------------------------------------------------------------------------------------------------------------------------------------------------------------------------------------------------------------------------------------------------------------------------------------------------------------------------------------------------------------------------------|-----------------------------------------------------------------------------------------------------------------------------------------------------------------------------------------------------------------------------------------------------------------------------------------------------------------------------------------------------------------------------------------------------------------------------------------------------------------------------------------------------------------------------------------------------------------------------------------------------------------------------------------------------------------------------------------------------------------------------------------------------------------------------------------------------------------------------------------------------------------------------------------------------------------------------------------------------------------------------------------------------------------------------------------------------------------------------------------------------------------------------------------------------------------------------------------------------------------------------------------------------------------------------------------------------------------------------------------------------------------------------------------------------------------------------------------------------------------------------------------------------------------------------------------------------------------------------------------------------------------------------------------------------|--------------------|----------------------|----------------|---------------------------------|------------------------------------|-------------------------------------|------------------------------|--------------------------------------|-----------------------------------------------|----------|----------|---------|----|----------|----------|----------|----|----------|---------|---------|----|---------|----------|----------|---|----------|----------|---------|---|----------|----------|---------|---|----------|----------|----------|---|----------|----------|----------|----|---------|----------|---------|----|---------|---------|----------|---|---------|---------|---------|---|---------|---------|---------|---|---------|---------|----------|---|---------|---------|---------|---|---------|---------|----------|---|---------|---------|----------|---|---------|---------|----------|---|---------|----------|----------|----|---------|----------|---------|--------------------------------------------------------------------------------------------------------------------------------------------------------------------------------------------------------------------------------------------------------------------------------------------------------------------------------------------------------------------------------------------------------------------------------------------------------------------------------------------------------------------------------------------------------------------------------------------------------------------------------------------------------------------------------------------------------------------------------------------------------------------------------------------------------------------------------------------------------------------------------------------------------------------------------------------------------------------------------------------------------------------------------------------------------------------------------------------------------------------------------------------|---------|---------|---------|---------|---------|----------|----------|----------|----------|----------|----------|----------|----------|----------|----------|----------|----------|----------|----------|----------|----------|----------|----------|----------|----------|----------|-----------|-----------|-----------|-----------|-----------|-----------|-----------|-----------|-----------|-----------|-----------|-----------|-----------|-----------|-----------|-----------|-----------|-----------|-----------|-----------|-----------|-----------|
| b <sub>Pd</sub>                                                                                                                                                                                                                                                                                                                                                                                                                                                    |                                                                                                                                                                                                                                                                                                                                                                                                                                                                                                                                                                                                                                                                                                                                                                                                                                                                                                                                                                                                                                                                                                                                                                                                                                                                                                                                                                                                                                                                                                                                                                                                                                                     |                    |                      |                |                                 |                                    |                                     |                              |                                      |                                               |          |          |         |    |          |          |          |    |          |         |         |    |         |          |          |   |          |          |         |   |          |          |         |   |          |          |          |   |          |          |          |    |         |          |         |    |         |         |          |   |         |         |         |   |         |         |         |   |         |         |          |   |         |         |         |   |         |         |          |   |         |         |          |   |         |         |          |   |         |          |          |    |         |          |         |                                                                                                                                                                                                                                                                                                                                                                                                                                                                                                                                                                                                                                                                                                                                                                                                                                                                                                                                                                                                                                                                                                                                            |         |         |         |         |         |          |          |          |          |          |          |          |          |          |          |          |          |          |          |          |          |          |          |          |          |          |           |           |           |           |           |           |           |           |           |           |           |           |           |           |           |           |           |           |           |           |           |           |
|                                                                                                                                                                                                                                                                                                                                                                                                                                                                    | <p style="text-align: center;"><b><u>Cartesian co-ordinate</u></b></p> <table border="1"> <thead> <tr> <th>Atoms</th> <th>X</th> <th>Y</th> <th>Z</th> </tr> </thead> <tbody> <tr><td>C</td><td>-2.94641</td><td>-1.55414</td><td>-0.56972</td></tr> <tr><td>C</td><td>-2.81419</td><td>-1.53627</td><td>0.82573</td></tr> <tr><td>Pt</td><td>-1.52907</td><td>-0.07182</td><td>-0.01838</td></tr> <tr><td>Cl</td><td>-3.22503</td><td>1.49033</td><td>0.14284</td></tr> <tr><td>Cl</td><td>0.30351</td><td>-1.66640</td><td>-0.18215</td></tr> <tr><td>H</td><td>-2.18513</td><td>-2.26582</td><td>1.32712</td></tr> <tr><td>H</td><td>-3.54090</td><td>-1.00610</td><td>1.43273</td></tr> <tr><td>H</td><td>-3.77550</td><td>-1.03886</td><td>-1.04373</td></tr> <tr><td>H</td><td>-2.42196</td><td>-2.29872</td><td>-1.16119</td></tr> <tr><td>Cl</td><td>3.71962</td><td>-1.46273</td><td>0.13777</td></tr> <tr><td>Cl</td><td>0.20305</td><td>1.69304</td><td>-0.18615</td></tr> <tr><td>H</td><td>4.08352</td><td>1.03826</td><td>1.41772</td></tr> <tr><td>C</td><td>3.40436</td><td>1.62225</td><td>0.80493</td></tr> <tr><td>C</td><td>3.53376</td><td>1.63200</td><td>-0.56244</td></tr> <tr><td>H</td><td>2.72855</td><td>2.31061</td><td>1.30461</td></tr> <tr><td>H</td><td>2.96355</td><td>2.32847</td><td>-1.17062</td></tr> <tr><td>H</td><td>4.31748</td><td>1.05716</td><td>-1.04566</td></tr> <tr><td>H</td><td>2.02202</td><td>0.07766</td><td>-0.02452</td></tr> <tr><td>H</td><td>2.55476</td><td>-1.72213</td><td>-0.21136</td></tr> <tr><td>Si</td><td>2.37926</td><td>-0.34476</td><td>0.31169</td></tr> </tbody> </table> | Atoms              | X                    | Y              | Z                               | C                                  | -2.94641                            | -1.55414                     | -0.56972                             | C                                             | -2.81419 | -1.53627 | 0.82573 | Pt | -1.52907 | -0.07182 | -0.01838 | Cl | -3.22503 | 1.49033 | 0.14284 | Cl | 0.30351 | -1.66640 | -0.18215 | H | -2.18513 | -2.26582 | 1.32712 | H | -3.54090 | -1.00610 | 1.43273 | H | -3.77550 | -1.03886 | -1.04373 | H | -2.42196 | -2.29872 | -1.16119 | Cl | 3.71962 | -1.46273 | 0.13777 | Cl | 0.20305 | 1.69304 | -0.18615 | H | 4.08352 | 1.03826 | 1.41772 | C | 3.40436 | 1.62225 | 0.80493 | C | 3.53376 | 1.63200 | -0.56244 | H | 2.72855 | 2.31061 | 1.30461 | H | 2.96355 | 2.32847 | -1.17062 | H | 4.31748 | 1.05716 | -1.04566 | H | 2.02202 | 0.07766 | -0.02452 | H | 2.55476 | -1.72213 | -0.21136 | Si | 2.37926 | -0.34476 | 0.31169 | <p style="text-align: center;"><b><u>Frequencies</u></b></p> <table border="1"> <tbody> <tr><td>11.4059</td><td>52.7471</td><td>80.9671</td></tr> <tr><td>89.0270</td><td>93.8371</td><td>110.8168</td></tr> <tr><td>126.8404</td><td>131.6688</td><td>143.5943</td></tr> <tr><td>162.8891</td><td>181.6858</td><td>192.9596</td></tr> <tr><td>234.2716</td><td>253.8482</td><td>271.1481</td></tr> <tr><td>280.7738</td><td>281.8292</td><td>350.1532</td></tr> <tr><td>354.5792</td><td>386.0877</td><td>407.1973</td></tr> <tr><td>512.1322</td><td>601.5285</td><td>771.2757</td></tr> <tr><td>832.8304</td><td>835.2863</td><td>1021.0858</td></tr> <tr><td>1040.9809</td><td>1058.0488</td><td>1061.0577</td></tr> <tr><td>1074.0606</td><td>1079.0580</td><td>1226.0963</td></tr> <tr><td>1236.8976</td><td>1287.3608</td><td>1337.1857</td></tr> <tr><td>1471.6477</td><td>1471.9254</td><td>1574.7216</td></tr> <tr><td>1615.1968</td><td>3173.1520</td><td>3180.5180</td></tr> <tr><td>3181.6300</td><td>3185.6525</td><td>3271.8199</td></tr> <tr><td>3280.7111</td><td>3289.6790</td><td>3297.2171</td></tr> </tbody> </table> | 11.4059 | 52.7471 | 80.9671 | 89.0270 | 93.8371 | 110.8168 | 126.8404 | 131.6688 | 143.5943 | 162.8891 | 181.6858 | 192.9596 | 234.2716 | 253.8482 | 271.1481 | 280.7738 | 281.8292 | 350.1532 | 354.5792 | 386.0877 | 407.1973 | 512.1322 | 601.5285 | 771.2757 | 832.8304 | 835.2863 | 1021.0858 | 1040.9809 | 1058.0488 | 1061.0577 | 1074.0606 | 1079.0580 | 1226.0963 | 1236.8976 | 1287.3608 | 1337.1857 | 1471.6477 | 1471.9254 | 1574.7216 | 1615.1968 | 3173.1520 | 3180.5180 | 3181.6300 | 3185.6525 | 3271.8199 | 3280.7111 | 3289.6790 | 3297.2171 |
| Atoms                                                                                                                                                                                                                                                                                                                                                                                                                                                              | X                                                                                                                                                                                                                                                                                                                                                                                                                                                                                                                                                                                                                                                                                                                                                                                                                                                                                                                                                                                                                                                                                                                                                                                                                                                                                                                                                                                                                                                                                                                                                                                                                                                   | Y                  | Z                    |                |                                 |                                    |                                     |                              |                                      |                                               |          |          |         |    |          |          |          |    |          |         |         |    |         |          |          |   |          |          |         |   |          |          |         |   |          |          |          |   |          |          |          |    |         |          |         |    |         |         |          |   |         |         |         |   |         |         |         |   |         |         |          |   |         |         |         |   |         |         |          |   |         |         |          |   |         |         |          |   |         |          |          |    |         |          |         |                                                                                                                                                                                                                                                                                                                                                                                                                                                                                                                                                                                                                                                                                                                                                                                                                                                                                                                                                                                                                                                                                                                                            |         |         |         |         |         |          |          |          |          |          |          |          |          |          |          |          |          |          |          |          |          |          |          |          |          |          |           |           |           |           |           |           |           |           |           |           |           |           |           |           |           |           |           |           |           |           |           |           |
| C                                                                                                                                                                                                                                                                                                                                                                                                                                                                  | -2.94641                                                                                                                                                                                                                                                                                                                                                                                                                                                                                                                                                                                                                                                                                                                                                                                                                                                                                                                                                                                                                                                                                                                                                                                                                                                                                                                                                                                                                                                                                                                                                                                                                                            | -1.55414           | -0.56972             |                |                                 |                                    |                                     |                              |                                      |                                               |          |          |         |    |          |          |          |    |          |         |         |    |         |          |          |   |          |          |         |   |          |          |         |   |          |          |          |   |          |          |          |    |         |          |         |    |         |         |          |   |         |         |         |   |         |         |         |   |         |         |          |   |         |         |         |   |         |         |          |   |         |         |          |   |         |         |          |   |         |          |          |    |         |          |         |                                                                                                                                                                                                                                                                                                                                                                                                                                                                                                                                                                                                                                                                                                                                                                                                                                                                                                                                                                                                                                                                                                                                            |         |         |         |         |         |          |          |          |          |          |          |          |          |          |          |          |          |          |          |          |          |          |          |          |          |          |           |           |           |           |           |           |           |           |           |           |           |           |           |           |           |           |           |           |           |           |           |           |
| C                                                                                                                                                                                                                                                                                                                                                                                                                                                                  | -2.81419                                                                                                                                                                                                                                                                                                                                                                                                                                                                                                                                                                                                                                                                                                                                                                                                                                                                                                                                                                                                                                                                                                                                                                                                                                                                                                                                                                                                                                                                                                                                                                                                                                            | -1.53627           | 0.82573              |                |                                 |                                    |                                     |                              |                                      |                                               |          |          |         |    |          |          |          |    |          |         |         |    |         |          |          |   |          |          |         |   |          |          |         |   |          |          |          |   |          |          |          |    |         |          |         |    |         |         |          |   |         |         |         |   |         |         |         |   |         |         |          |   |         |         |         |   |         |         |          |   |         |         |          |   |         |         |          |   |         |          |          |    |         |          |         |                                                                                                                                                                                                                                                                                                                                                                                                                                                                                                                                                                                                                                                                                                                                                                                                                                                                                                                                                                                                                                                                                                                                            |         |         |         |         |         |          |          |          |          |          |          |          |          |          |          |          |          |          |          |          |          |          |          |          |          |          |           |           |           |           |           |           |           |           |           |           |           |           |           |           |           |           |           |           |           |           |           |           |
| Pt                                                                                                                                                                                                                                                                                                                                                                                                                                                                 | -1.52907                                                                                                                                                                                                                                                                                                                                                                                                                                                                                                                                                                                                                                                                                                                                                                                                                                                                                                                                                                                                                                                                                                                                                                                                                                                                                                                                                                                                                                                                                                                                                                                                                                            | -0.07182           | -0.01838             |                |                                 |                                    |                                     |                              |                                      |                                               |          |          |         |    |          |          |          |    |          |         |         |    |         |          |          |   |          |          |         |   |          |          |         |   |          |          |          |   |          |          |          |    |         |          |         |    |         |         |          |   |         |         |         |   |         |         |         |   |         |         |          |   |         |         |         |   |         |         |          |   |         |         |          |   |         |         |          |   |         |          |          |    |         |          |         |                                                                                                                                                                                                                                                                                                                                                                                                                                                                                                                                                                                                                                                                                                                                                                                                                                                                                                                                                                                                                                                                                                                                            |         |         |         |         |         |          |          |          |          |          |          |          |          |          |          |          |          |          |          |          |          |          |          |          |          |          |           |           |           |           |           |           |           |           |           |           |           |           |           |           |           |           |           |           |           |           |           |           |
| Cl                                                                                                                                                                                                                                                                                                                                                                                                                                                                 | -3.22503                                                                                                                                                                                                                                                                                                                                                                                                                                                                                                                                                                                                                                                                                                                                                                                                                                                                                                                                                                                                                                                                                                                                                                                                                                                                                                                                                                                                                                                                                                                                                                                                                                            | 1.49033            | 0.14284              |                |                                 |                                    |                                     |                              |                                      |                                               |          |          |         |    |          |          |          |    |          |         |         |    |         |          |          |   |          |          |         |   |          |          |         |   |          |          |          |   |          |          |          |    |         |          |         |    |         |         |          |   |         |         |         |   |         |         |         |   |         |         |          |   |         |         |         |   |         |         |          |   |         |         |          |   |         |         |          |   |         |          |          |    |         |          |         |                                                                                                                                                                                                                                                                                                                                                                                                                                                                                                                                                                                                                                                                                                                                                                                                                                                                                                                                                                                                                                                                                                                                            |         |         |         |         |         |          |          |          |          |          |          |          |          |          |          |          |          |          |          |          |          |          |          |          |          |          |           |           |           |           |           |           |           |           |           |           |           |           |           |           |           |           |           |           |           |           |           |           |
| Cl                                                                                                                                                                                                                                                                                                                                                                                                                                                                 | 0.30351                                                                                                                                                                                                                                                                                                                                                                                                                                                                                                                                                                                                                                                                                                                                                                                                                                                                                                                                                                                                                                                                                                                                                                                                                                                                                                                                                                                                                                                                                                                                                                                                                                             | -1.66640           | -0.18215             |                |                                 |                                    |                                     |                              |                                      |                                               |          |          |         |    |          |          |          |    |          |         |         |    |         |          |          |   |          |          |         |   |          |          |         |   |          |          |          |   |          |          |          |    |         |          |         |    |         |         |          |   |         |         |         |   |         |         |         |   |         |         |          |   |         |         |         |   |         |         |          |   |         |         |          |   |         |         |          |   |         |          |          |    |         |          |         |                                                                                                                                                                                                                                                                                                                                                                                                                                                                                                                                                                                                                                                                                                                                                                                                                                                                                                                                                                                                                                                                                                                                            |         |         |         |         |         |          |          |          |          |          |          |          |          |          |          |          |          |          |          |          |          |          |          |          |          |          |           |           |           |           |           |           |           |           |           |           |           |           |           |           |           |           |           |           |           |           |           |           |
| H                                                                                                                                                                                                                                                                                                                                                                                                                                                                  | -2.18513                                                                                                                                                                                                                                                                                                                                                                                                                                                                                                                                                                                                                                                                                                                                                                                                                                                                                                                                                                                                                                                                                                                                                                                                                                                                                                                                                                                                                                                                                                                                                                                                                                            | -2.26582           | 1.32712              |                |                                 |                                    |                                     |                              |                                      |                                               |          |          |         |    |          |          |          |    |          |         |         |    |         |          |          |   |          |          |         |   |          |          |         |   |          |          |          |   |          |          |          |    |         |          |         |    |         |         |          |   |         |         |         |   |         |         |         |   |         |         |          |   |         |         |         |   |         |         |          |   |         |         |          |   |         |         |          |   |         |          |          |    |         |          |         |                                                                                                                                                                                                                                                                                                                                                                                                                                                                                                                                                                                                                                                                                                                                                                                                                                                                                                                                                                                                                                                                                                                                            |         |         |         |         |         |          |          |          |          |          |          |          |          |          |          |          |          |          |          |          |          |          |          |          |          |          |           |           |           |           |           |           |           |           |           |           |           |           |           |           |           |           |           |           |           |           |           |           |
| H                                                                                                                                                                                                                                                                                                                                                                                                                                                                  | -3.54090                                                                                                                                                                                                                                                                                                                                                                                                                                                                                                                                                                                                                                                                                                                                                                                                                                                                                                                                                                                                                                                                                                                                                                                                                                                                                                                                                                                                                                                                                                                                                                                                                                            | -1.00610           | 1.43273              |                |                                 |                                    |                                     |                              |                                      |                                               |          |          |         |    |          |          |          |    |          |         |         |    |         |          |          |   |          |          |         |   |          |          |         |   |          |          |          |   |          |          |          |    |         |          |         |    |         |         |          |   |         |         |         |   |         |         |         |   |         |         |          |   |         |         |         |   |         |         |          |   |         |         |          |   |         |         |          |   |         |          |          |    |         |          |         |                                                                                                                                                                                                                                                                                                                                                                                                                                                                                                                                                                                                                                                                                                                                                                                                                                                                                                                                                                                                                                                                                                                                            |         |         |         |         |         |          |          |          |          |          |          |          |          |          |          |          |          |          |          |          |          |          |          |          |          |          |           |           |           |           |           |           |           |           |           |           |           |           |           |           |           |           |           |           |           |           |           |           |
| H                                                                                                                                                                                                                                                                                                                                                                                                                                                                  | -3.77550                                                                                                                                                                                                                                                                                                                                                                                                                                                                                                                                                                                                                                                                                                                                                                                                                                                                                                                                                                                                                                                                                                                                                                                                                                                                                                                                                                                                                                                                                                                                                                                                                                            | -1.03886           | -1.04373             |                |                                 |                                    |                                     |                              |                                      |                                               |          |          |         |    |          |          |          |    |          |         |         |    |         |          |          |   |          |          |         |   |          |          |         |   |          |          |          |   |          |          |          |    |         |          |         |    |         |         |          |   |         |         |         |   |         |         |         |   |         |         |          |   |         |         |         |   |         |         |          |   |         |         |          |   |         |         |          |   |         |          |          |    |         |          |         |                                                                                                                                                                                                                                                                                                                                                                                                                                                                                                                                                                                                                                                                                                                                                                                                                                                                                                                                                                                                                                                                                                                                            |         |         |         |         |         |          |          |          |          |          |          |          |          |          |          |          |          |          |          |          |          |          |          |          |          |          |           |           |           |           |           |           |           |           |           |           |           |           |           |           |           |           |           |           |           |           |           |           |
| H                                                                                                                                                                                                                                                                                                                                                                                                                                                                  | -2.42196                                                                                                                                                                                                                                                                                                                                                                                                                                                                                                                                                                                                                                                                                                                                                                                                                                                                                                                                                                                                                                                                                                                                                                                                                                                                                                                                                                                                                                                                                                                                                                                                                                            | -2.29872           | -1.16119             |                |                                 |                                    |                                     |                              |                                      |                                               |          |          |         |    |          |          |          |    |          |         |         |    |         |          |          |   |          |          |         |   |          |          |         |   |          |          |          |   |          |          |          |    |         |          |         |    |         |         |          |   |         |         |         |   |         |         |         |   |         |         |          |   |         |         |         |   |         |         |          |   |         |         |          |   |         |         |          |   |         |          |          |    |         |          |         |                                                                                                                                                                                                                                                                                                                                                                                                                                                                                                                                                                                                                                                                                                                                                                                                                                                                                                                                                                                                                                                                                                                                            |         |         |         |         |         |          |          |          |          |          |          |          |          |          |          |          |          |          |          |          |          |          |          |          |          |          |           |           |           |           |           |           |           |           |           |           |           |           |           |           |           |           |           |           |           |           |           |           |
| Cl                                                                                                                                                                                                                                                                                                                                                                                                                                                                 | 3.71962                                                                                                                                                                                                                                                                                                                                                                                                                                                                                                                                                                                                                                                                                                                                                                                                                                                                                                                                                                                                                                                                                                                                                                                                                                                                                                                                                                                                                                                                                                                                                                                                                                             | -1.46273           | 0.13777              |                |                                 |                                    |                                     |                              |                                      |                                               |          |          |         |    |          |          |          |    |          |         |         |    |         |          |          |   |          |          |         |   |          |          |         |   |          |          |          |   |          |          |          |    |         |          |         |    |         |         |          |   |         |         |         |   |         |         |         |   |         |         |          |   |         |         |         |   |         |         |          |   |         |         |          |   |         |         |          |   |         |          |          |    |         |          |         |                                                                                                                                                                                                                                                                                                                                                                                                                                                                                                                                                                                                                                                                                                                                                                                                                                                                                                                                                                                                                                                                                                                                            |         |         |         |         |         |          |          |          |          |          |          |          |          |          |          |          |          |          |          |          |          |          |          |          |          |          |           |           |           |           |           |           |           |           |           |           |           |           |           |           |           |           |           |           |           |           |           |           |
| Cl                                                                                                                                                                                                                                                                                                                                                                                                                                                                 | 0.20305                                                                                                                                                                                                                                                                                                                                                                                                                                                                                                                                                                                                                                                                                                                                                                                                                                                                                                                                                                                                                                                                                                                                                                                                                                                                                                                                                                                                                                                                                                                                                                                                                                             | 1.69304            | -0.18615             |                |                                 |                                    |                                     |                              |                                      |                                               |          |          |         |    |          |          |          |    |          |         |         |    |         |          |          |   |          |          |         |   |          |          |         |   |          |          |          |   |          |          |          |    |         |          |         |    |         |         |          |   |         |         |         |   |         |         |         |   |         |         |          |   |         |         |         |   |         |         |          |   |         |         |          |   |         |         |          |   |         |          |          |    |         |          |         |                                                                                                                                                                                                                                                                                                                                                                                                                                                                                                                                                                                                                                                                                                                                                                                                                                                                                                                                                                                                                                                                                                                                            |         |         |         |         |         |          |          |          |          |          |          |          |          |          |          |          |          |          |          |          |          |          |          |          |          |          |           |           |           |           |           |           |           |           |           |           |           |           |           |           |           |           |           |           |           |           |           |           |
| H                                                                                                                                                                                                                                                                                                                                                                                                                                                                  | 4.08352                                                                                                                                                                                                                                                                                                                                                                                                                                                                                                                                                                                                                                                                                                                                                                                                                                                                                                                                                                                                                                                                                                                                                                                                                                                                                                                                                                                                                                                                                                                                                                                                                                             | 1.03826            | 1.41772              |                |                                 |                                    |                                     |                              |                                      |                                               |          |          |         |    |          |          |          |    |          |         |         |    |         |          |          |   |          |          |         |   |          |          |         |   |          |          |          |   |          |          |          |    |         |          |         |    |         |         |          |   |         |         |         |   |         |         |         |   |         |         |          |   |         |         |         |   |         |         |          |   |         |         |          |   |         |         |          |   |         |          |          |    |         |          |         |                                                                                                                                                                                                                                                                                                                                                                                                                                                                                                                                                                                                                                                                                                                                                                                                                                                                                                                                                                                                                                                                                                                                            |         |         |         |         |         |          |          |          |          |          |          |          |          |          |          |          |          |          |          |          |          |          |          |          |          |          |           |           |           |           |           |           |           |           |           |           |           |           |           |           |           |           |           |           |           |           |           |           |
| C                                                                                                                                                                                                                                                                                                                                                                                                                                                                  | 3.40436                                                                                                                                                                                                                                                                                                                                                                                                                                                                                                                                                                                                                                                                                                                                                                                                                                                                                                                                                                                                                                                                                                                                                                                                                                                                                                                                                                                                                                                                                                                                                                                                                                             | 1.62225            | 0.80493              |                |                                 |                                    |                                     |                              |                                      |                                               |          |          |         |    |          |          |          |    |          |         |         |    |         |          |          |   |          |          |         |   |          |          |         |   |          |          |          |   |          |          |          |    |         |          |         |    |         |         |          |   |         |         |         |   |         |         |         |   |         |         |          |   |         |         |         |   |         |         |          |   |         |         |          |   |         |         |          |   |         |          |          |    |         |          |         |                                                                                                                                                                                                                                                                                                                                                                                                                                                                                                                                                                                                                                                                                                                                                                                                                                                                                                                                                                                                                                                                                                                                            |         |         |         |         |         |          |          |          |          |          |          |          |          |          |          |          |          |          |          |          |          |          |          |          |          |          |           |           |           |           |           |           |           |           |           |           |           |           |           |           |           |           |           |           |           |           |           |           |
| C                                                                                                                                                                                                                                                                                                                                                                                                                                                                  | 3.53376                                                                                                                                                                                                                                                                                                                                                                                                                                                                                                                                                                                                                                                                                                                                                                                                                                                                                                                                                                                                                                                                                                                                                                                                                                                                                                                                                                                                                                                                                                                                                                                                                                             | 1.63200            | -0.56244             |                |                                 |                                    |                                     |                              |                                      |                                               |          |          |         |    |          |          |          |    |          |         |         |    |         |          |          |   |          |          |         |   |          |          |         |   |          |          |          |   |          |          |          |    |         |          |         |    |         |         |          |   |         |         |         |   |         |         |         |   |         |         |          |   |         |         |         |   |         |         |          |   |         |         |          |   |         |         |          |   |         |          |          |    |         |          |         |                                                                                                                                                                                                                                                                                                                                                                                                                                                                                                                                                                                                                                                                                                                                                                                                                                                                                                                                                                                                                                                                                                                                            |         |         |         |         |         |          |          |          |          |          |          |          |          |          |          |          |          |          |          |          |          |          |          |          |          |          |           |           |           |           |           |           |           |           |           |           |           |           |           |           |           |           |           |           |           |           |           |           |
| H                                                                                                                                                                                                                                                                                                                                                                                                                                                                  | 2.72855                                                                                                                                                                                                                                                                                                                                                                                                                                                                                                                                                                                                                                                                                                                                                                                                                                                                                                                                                                                                                                                                                                                                                                                                                                                                                                                                                                                                                                                                                                                                                                                                                                             | 2.31061            | 1.30461              |                |                                 |                                    |                                     |                              |                                      |                                               |          |          |         |    |          |          |          |    |          |         |         |    |         |          |          |   |          |          |         |   |          |          |         |   |          |          |          |   |          |          |          |    |         |          |         |    |         |         |          |   |         |         |         |   |         |         |         |   |         |         |          |   |         |         |         |   |         |         |          |   |         |         |          |   |         |         |          |   |         |          |          |    |         |          |         |                                                                                                                                                                                                                                                                                                                                                                                                                                                                                                                                                                                                                                                                                                                                                                                                                                                                                                                                                                                                                                                                                                                                            |         |         |         |         |         |          |          |          |          |          |          |          |          |          |          |          |          |          |          |          |          |          |          |          |          |          |           |           |           |           |           |           |           |           |           |           |           |           |           |           |           |           |           |           |           |           |           |           |
| H                                                                                                                                                                                                                                                                                                                                                                                                                                                                  | 2.96355                                                                                                                                                                                                                                                                                                                                                                                                                                                                                                                                                                                                                                                                                                                                                                                                                                                                                                                                                                                                                                                                                                                                                                                                                                                                                                                                                                                                                                                                                                                                                                                                                                             | 2.32847            | -1.17062             |                |                                 |                                    |                                     |                              |                                      |                                               |          |          |         |    |          |          |          |    |          |         |         |    |         |          |          |   |          |          |         |   |          |          |         |   |          |          |          |   |          |          |          |    |         |          |         |    |         |         |          |   |         |         |         |   |         |         |         |   |         |         |          |   |         |         |         |   |         |         |          |   |         |         |          |   |         |         |          |   |         |          |          |    |         |          |         |                                                                                                                                                                                                                                                                                                                                                                                                                                                                                                                                                                                                                                                                                                                                                                                                                                                                                                                                                                                                                                                                                                                                            |         |         |         |         |         |          |          |          |          |          |          |          |          |          |          |          |          |          |          |          |          |          |          |          |          |          |           |           |           |           |           |           |           |           |           |           |           |           |           |           |           |           |           |           |           |           |           |           |
| H                                                                                                                                                                                                                                                                                                                                                                                                                                                                  | 4.31748                                                                                                                                                                                                                                                                                                                                                                                                                                                                                                                                                                                                                                                                                                                                                                                                                                                                                                                                                                                                                                                                                                                                                                                                                                                                                                                                                                                                                                                                                                                                                                                                                                             | 1.05716            | -1.04566             |                |                                 |                                    |                                     |                              |                                      |                                               |          |          |         |    |          |          |          |    |          |         |         |    |         |          |          |   |          |          |         |   |          |          |         |   |          |          |          |   |          |          |          |    |         |          |         |    |         |         |          |   |         |         |         |   |         |         |         |   |         |         |          |   |         |         |         |   |         |         |          |   |         |         |          |   |         |         |          |   |         |          |          |    |         |          |         |                                                                                                                                                                                                                                                                                                                                                                                                                                                                                                                                                                                                                                                                                                                                                                                                                                                                                                                                                                                                                                                                                                                                            |         |         |         |         |         |          |          |          |          |          |          |          |          |          |          |          |          |          |          |          |          |          |          |          |          |          |           |           |           |           |           |           |           |           |           |           |           |           |           |           |           |           |           |           |           |           |           |           |
| H                                                                                                                                                                                                                                                                                                                                                                                                                                                                  | 2.02202                                                                                                                                                                                                                                                                                                                                                                                                                                                                                                                                                                                                                                                                                                                                                                                                                                                                                                                                                                                                                                                                                                                                                                                                                                                                                                                                                                                                                                                                                                                                                                                                                                             | 0.07766            | -0.02452             |                |                                 |                                    |                                     |                              |                                      |                                               |          |          |         |    |          |          |          |    |          |         |         |    |         |          |          |   |          |          |         |   |          |          |         |   |          |          |          |   |          |          |          |    |         |          |         |    |         |         |          |   |         |         |         |   |         |         |         |   |         |         |          |   |         |         |         |   |         |         |          |   |         |         |          |   |         |         |          |   |         |          |          |    |         |          |         |                                                                                                                                                                                                                                                                                                                                                                                                                                                                                                                                                                                                                                                                                                                                                                                                                                                                                                                                                                                                                                                                                                                                            |         |         |         |         |         |          |          |          |          |          |          |          |          |          |          |          |          |          |          |          |          |          |          |          |          |          |           |           |           |           |           |           |           |           |           |           |           |           |           |           |           |           |           |           |           |           |           |           |
| H                                                                                                                                                                                                                                                                                                                                                                                                                                                                  | 2.55476                                                                                                                                                                                                                                                                                                                                                                                                                                                                                                                                                                                                                                                                                                                                                                                                                                                                                                                                                                                                                                                                                                                                                                                                                                                                                                                                                                                                                                                                                                                                                                                                                                             | -1.72213           | -0.21136             |                |                                 |                                    |                                     |                              |                                      |                                               |          |          |         |    |          |          |          |    |          |         |         |    |         |          |          |   |          |          |         |   |          |          |         |   |          |          |          |   |          |          |          |    |         |          |         |    |         |         |          |   |         |         |         |   |         |         |         |   |         |         |          |   |         |         |         |   |         |         |          |   |         |         |          |   |         |         |          |   |         |          |          |    |         |          |         |                                                                                                                                                                                                                                                                                                                                                                                                                                                                                                                                                                                                                                                                                                                                                                                                                                                                                                                                                                                                                                                                                                                                            |         |         |         |         |         |          |          |          |          |          |          |          |          |          |          |          |          |          |          |          |          |          |          |          |          |          |           |           |           |           |           |           |           |           |           |           |           |           |           |           |           |           |           |           |           |           |           |           |
| Si                                                                                                                                                                                                                                                                                                                                                                                                                                                                 | 2.37926                                                                                                                                                                                                                                                                                                                                                                                                                                                                                                                                                                                                                                                                                                                                                                                                                                                                                                                                                                                                                                                                                                                                                                                                                                                                                                                                                                                                                                                                                                                                                                                                                                             | -0.34476           | 0.31169              |                |                                 |                                    |                                     |                              |                                      |                                               |          |          |         |    |          |          |          |    |          |         |         |    |         |          |          |   |          |          |         |   |          |          |         |   |          |          |          |   |          |          |          |    |         |          |         |    |         |         |          |   |         |         |         |   |         |         |         |   |         |         |          |   |         |         |         |   |         |         |          |   |         |         |          |   |         |         |          |   |         |          |          |    |         |          |         |                                                                                                                                                                                                                                                                                                                                                                                                                                                                                                                                                                                                                                                                                                                                                                                                                                                                                                                                                                                                                                                                                                                                            |         |         |         |         |         |          |          |          |          |          |          |          |          |          |          |          |          |          |          |          |          |          |          |          |          |          |           |           |           |           |           |           |           |           |           |           |           |           |           |           |           |           |           |           |           |           |           |           |
| 11.4059                                                                                                                                                                                                                                                                                                                                                                                                                                                            | 52.7471                                                                                                                                                                                                                                                                                                                                                                                                                                                                                                                                                                                                                                                                                                                                                                                                                                                                                                                                                                                                                                                                                                                                                                                                                                                                                                                                                                                                                                                                                                                                                                                                                                             | 80.9671            |                      |                |                                 |                                    |                                     |                              |                                      |                                               |          |          |         |    |          |          |          |    |          |         |         |    |         |          |          |   |          |          |         |   |          |          |         |   |          |          |          |   |          |          |          |    |         |          |         |    |         |         |          |   |         |         |         |   |         |         |         |   |         |         |          |   |         |         |         |   |         |         |          |   |         |         |          |   |         |         |          |   |         |          |          |    |         |          |         |                                                                                                                                                                                                                                                                                                                                                                                                                                                                                                                                                                                                                                                                                                                                                                                                                                                                                                                                                                                                                                                                                                                                            |         |         |         |         |         |          |          |          |          |          |          |          |          |          |          |          |          |          |          |          |          |          |          |          |          |          |           |           |           |           |           |           |           |           |           |           |           |           |           |           |           |           |           |           |           |           |           |           |
| 89.0270                                                                                                                                                                                                                                                                                                                                                                                                                                                            | 93.8371                                                                                                                                                                                                                                                                                                                                                                                                                                                                                                                                                                                                                                                                                                                                                                                                                                                                                                                                                                                                                                                                                                                                                                                                                                                                                                                                                                                                                                                                                                                                                                                                                                             | 110.8168           |                      |                |                                 |                                    |                                     |                              |                                      |                                               |          |          |         |    |          |          |          |    |          |         |         |    |         |          |          |   |          |          |         |   |          |          |         |   |          |          |          |   |          |          |          |    |         |          |         |    |         |         |          |   |         |         |         |   |         |         |         |   |         |         |          |   |         |         |         |   |         |         |          |   |         |         |          |   |         |         |          |   |         |          |          |    |         |          |         |                                                                                                                                                                                                                                                                                                                                                                                                                                                                                                                                                                                                                                                                                                                                                                                                                                                                                                                                                                                                                                                                                                                                            |         |         |         |         |         |          |          |          |          |          |          |          |          |          |          |          |          |          |          |          |          |          |          |          |          |          |           |           |           |           |           |           |           |           |           |           |           |           |           |           |           |           |           |           |           |           |           |           |
| 126.8404                                                                                                                                                                                                                                                                                                                                                                                                                                                           | 131.6688                                                                                                                                                                                                                                                                                                                                                                                                                                                                                                                                                                                                                                                                                                                                                                                                                                                                                                                                                                                                                                                                                                                                                                                                                                                                                                                                                                                                                                                                                                                                                                                                                                            | 143.5943           |                      |                |                                 |                                    |                                     |                              |                                      |                                               |          |          |         |    |          |          |          |    |          |         |         |    |         |          |          |   |          |          |         |   |          |          |         |   |          |          |          |   |          |          |          |    |         |          |         |    |         |         |          |   |         |         |         |   |         |         |         |   |         |         |          |   |         |         |         |   |         |         |          |   |         |         |          |   |         |         |          |   |         |          |          |    |         |          |         |                                                                                                                                                                                                                                                                                                                                                                                                                                                                                                                                                                                                                                                                                                                                                                                                                                                                                                                                                                                                                                                                                                                                            |         |         |         |         |         |          |          |          |          |          |          |          |          |          |          |          |          |          |          |          |          |          |          |          |          |          |           |           |           |           |           |           |           |           |           |           |           |           |           |           |           |           |           |           |           |           |           |           |
| 162.8891                                                                                                                                                                                                                                                                                                                                                                                                                                                           | 181.6858                                                                                                                                                                                                                                                                                                                                                                                                                                                                                                                                                                                                                                                                                                                                                                                                                                                                                                                                                                                                                                                                                                                                                                                                                                                                                                                                                                                                                                                                                                                                                                                                                                            | 192.9596           |                      |                |                                 |                                    |                                     |                              |                                      |                                               |          |          |         |    |          |          |          |    |          |         |         |    |         |          |          |   |          |          |         |   |          |          |         |   |          |          |          |   |          |          |          |    |         |          |         |    |         |         |          |   |         |         |         |   |         |         |         |   |         |         |          |   |         |         |         |   |         |         |          |   |         |         |          |   |         |         |          |   |         |          |          |    |         |          |         |                                                                                                                                                                                                                                                                                                                                                                                                                                                                                                                                                                                                                                                                                                                                                                                                                                                                                                                                                                                                                                                                                                                                            |         |         |         |         |         |          |          |          |          |          |          |          |          |          |          |          |          |          |          |          |          |          |          |          |          |          |           |           |           |           |           |           |           |           |           |           |           |           |           |           |           |           |           |           |           |           |           |           |
| 234.2716                                                                                                                                                                                                                                                                                                                                                                                                                                                           | 253.8482                                                                                                                                                                                                                                                                                                                                                                                                                                                                                                                                                                                                                                                                                                                                                                                                                                                                                                                                                                                                                                                                                                                                                                                                                                                                                                                                                                                                                                                                                                                                                                                                                                            | 271.1481           |                      |                |                                 |                                    |                                     |                              |                                      |                                               |          |          |         |    |          |          |          |    |          |         |         |    |         |          |          |   |          |          |         |   |          |          |         |   |          |          |          |   |          |          |          |    |         |          |         |    |         |         |          |   |         |         |         |   |         |         |         |   |         |         |          |   |         |         |         |   |         |         |          |   |         |         |          |   |         |         |          |   |         |          |          |    |         |          |         |                                                                                                                                                                                                                                                                                                                                                                                                                                                                                                                                                                                                                                                                                                                                                                                                                                                                                                                                                                                                                                                                                                                                            |         |         |         |         |         |          |          |          |          |          |          |          |          |          |          |          |          |          |          |          |          |          |          |          |          |          |           |           |           |           |           |           |           |           |           |           |           |           |           |           |           |           |           |           |           |           |           |           |
| 280.7738                                                                                                                                                                                                                                                                                                                                                                                                                                                           | 281.8292                                                                                                                                                                                                                                                                                                                                                                                                                                                                                                                                                                                                                                                                                                                                                                                                                                                                                                                                                                                                                                                                                                                                                                                                                                                                                                                                                                                                                                                                                                                                                                                                                                            | 350.1532           |                      |                |                                 |                                    |                                     |                              |                                      |                                               |          |          |         |    |          |          |          |    |          |         |         |    |         |          |          |   |          |          |         |   |          |          |         |   |          |          |          |   |          |          |          |    |         |          |         |    |         |         |          |   |         |         |         |   |         |         |         |   |         |         |          |   |         |         |         |   |         |         |          |   |         |         |          |   |         |         |          |   |         |          |          |    |         |          |         |                                                                                                                                                                                                                                                                                                                                                                                                                                                                                                                                                                                                                                                                                                                                                                                                                                                                                                                                                                                                                                                                                                                                            |         |         |         |         |         |          |          |          |          |          |          |          |          |          |          |          |          |          |          |          |          |          |          |          |          |          |           |           |           |           |           |           |           |           |           |           |           |           |           |           |           |           |           |           |           |           |           |           |
| 354.5792                                                                                                                                                                                                                                                                                                                                                                                                                                                           | 386.0877                                                                                                                                                                                                                                                                                                                                                                                                                                                                                                                                                                                                                                                                                                                                                                                                                                                                                                                                                                                                                                                                                                                                                                                                                                                                                                                                                                                                                                                                                                                                                                                                                                            | 407.1973           |                      |                |                                 |                                    |                                     |                              |                                      |                                               |          |          |         |    |          |          |          |    |          |         |         |    |         |          |          |   |          |          |         |   |          |          |         |   |          |          |          |   |          |          |          |    |         |          |         |    |         |         |          |   |         |         |         |   |         |         |         |   |         |         |          |   |         |         |         |   |         |         |          |   |         |         |          |   |         |         |          |   |         |          |          |    |         |          |         |                                                                                                                                                                                                                                                                                                                                                                                                                                                                                                                                                                                                                                                                                                                                                                                                                                                                                                                                                                                                                                                                                                                                            |         |         |         |         |         |          |          |          |          |          |          |          |          |          |          |          |          |          |          |          |          |          |          |          |          |          |           |           |           |           |           |           |           |           |           |           |           |           |           |           |           |           |           |           |           |           |           |           |
| 512.1322                                                                                                                                                                                                                                                                                                                                                                                                                                                           | 601.5285                                                                                                                                                                                                                                                                                                                                                                                                                                                                                                                                                                                                                                                                                                                                                                                                                                                                                                                                                                                                                                                                                                                                                                                                                                                                                                                                                                                                                                                                                                                                                                                                                                            | 771.2757           |                      |                |                                 |                                    |                                     |                              |                                      |                                               |          |          |         |    |          |          |          |    |          |         |         |    |         |          |          |   |          |          |         |   |          |          |         |   |          |          |          |   |          |          |          |    |         |          |         |    |         |         |          |   |         |         |         |   |         |         |         |   |         |         |          |   |         |         |         |   |         |         |          |   |         |         |          |   |         |         |          |   |         |          |          |    |         |          |         |                                                                                                                                                                                                                                                                                                                                                                                                                                                                                                                                                                                                                                                                                                                                                                                                                                                                                                                                                                                                                                                                                                                                            |         |         |         |         |         |          |          |          |          |          |          |          |          |          |          |          |          |          |          |          |          |          |          |          |          |          |           |           |           |           |           |           |           |           |           |           |           |           |           |           |           |           |           |           |           |           |           |           |
| 832.8304                                                                                                                                                                                                                                                                                                                                                                                                                                                           | 835.2863                                                                                                                                                                                                                                                                                                                                                                                                                                                                                                                                                                                                                                                                                                                                                                                                                                                                                                                                                                                                                                                                                                                                                                                                                                                                                                                                                                                                                                                                                                                                                                                                                                            | 1021.0858          |                      |                |                                 |                                    |                                     |                              |                                      |                                               |          |          |         |    |          |          |          |    |          |         |         |    |         |          |          |   |          |          |         |   |          |          |         |   |          |          |          |   |          |          |          |    |         |          |         |    |         |         |          |   |         |         |         |   |         |         |         |   |         |         |          |   |         |         |         |   |         |         |          |   |         |         |          |   |         |         |          |   |         |          |          |    |         |          |         |                                                                                                                                                                                                                                                                                                                                                                                                                                                                                                                                                                                                                                                                                                                                                                                                                                                                                                                                                                                                                                                                                                                                            |         |         |         |         |         |          |          |          |          |          |          |          |          |          |          |          |          |          |          |          |          |          |          |          |          |          |           |           |           |           |           |           |           |           |           |           |           |           |           |           |           |           |           |           |           |           |           |           |
| 1040.9809                                                                                                                                                                                                                                                                                                                                                                                                                                                          | 1058.0488                                                                                                                                                                                                                                                                                                                                                                                                                                                                                                                                                                                                                                                                                                                                                                                                                                                                                                                                                                                                                                                                                                                                                                                                                                                                                                                                                                                                                                                                                                                                                                                                                                           | 1061.0577          |                      |                |                                 |                                    |                                     |                              |                                      |                                               |          |          |         |    |          |          |          |    |          |         |         |    |         |          |          |   |          |          |         |   |          |          |         |   |          |          |          |   |          |          |          |    |         |          |         |    |         |         |          |   |         |         |         |   |         |         |         |   |         |         |          |   |         |         |         |   |         |         |          |   |         |         |          |   |         |         |          |   |         |          |          |    |         |          |         |                                                                                                                                                                                                                                                                                                                                                                                                                                                                                                                                                                                                                                                                                                                                                                                                                                                                                                                                                                                                                                                                                                                                            |         |         |         |         |         |          |          |          |          |          |          |          |          |          |          |          |          |          |          |          |          |          |          |          |          |          |           |           |           |           |           |           |           |           |           |           |           |           |           |           |           |           |           |           |           |           |           |           |
| 1074.0606                                                                                                                                                                                                                                                                                                                                                                                                                                                          | 1079.0580                                                                                                                                                                                                                                                                                                                                                                                                                                                                                                                                                                                                                                                                                                                                                                                                                                                                                                                                                                                                                                                                                                                                                                                                                                                                                                                                                                                                                                                                                                                                                                                                                                           | 1226.0963          |                      |                |                                 |                                    |                                     |                              |                                      |                                               |          |          |         |    |          |          |          |    |          |         |         |    |         |          |          |   |          |          |         |   |          |          |         |   |          |          |          |   |          |          |          |    |         |          |         |    |         |         |          |   |         |         |         |   |         |         |         |   |         |         |          |   |         |         |         |   |         |         |          |   |         |         |          |   |         |         |          |   |         |          |          |    |         |          |         |                                                                                                                                                                                                                                                                                                                                                                                                                                                                                                                                                                                                                                                                                                                                                                                                                                                                                                                                                                                                                                                                                                                                            |         |         |         |         |         |          |          |          |          |          |          |          |          |          |          |          |          |          |          |          |          |          |          |          |          |          |           |           |           |           |           |           |           |           |           |           |           |           |           |           |           |           |           |           |           |           |           |           |
| 1236.8976                                                                                                                                                                                                                                                                                                                                                                                                                                                          | 1287.3608                                                                                                                                                                                                                                                                                                                                                                                                                                                                                                                                                                                                                                                                                                                                                                                                                                                                                                                                                                                                                                                                                                                                                                                                                                                                                                                                                                                                                                                                                                                                                                                                                                           | 1337.1857          |                      |                |                                 |                                    |                                     |                              |                                      |                                               |          |          |         |    |          |          |          |    |          |         |         |    |         |          |          |   |          |          |         |   |          |          |         |   |          |          |          |   |          |          |          |    |         |          |         |    |         |         |          |   |         |         |         |   |         |         |         |   |         |         |          |   |         |         |         |   |         |         |          |   |         |         |          |   |         |         |          |   |         |          |          |    |         |          |         |                                                                                                                                                                                                                                                                                                                                                                                                                                                                                                                                                                                                                                                                                                                                                                                                                                                                                                                                                                                                                                                                                                                                            |         |         |         |         |         |          |          |          |          |          |          |          |          |          |          |          |          |          |          |          |          |          |          |          |          |          |           |           |           |           |           |           |           |           |           |           |           |           |           |           |           |           |           |           |           |           |           |           |
| 1471.6477                                                                                                                                                                                                                                                                                                                                                                                                                                                          | 1471.9254                                                                                                                                                                                                                                                                                                                                                                                                                                                                                                                                                                                                                                                                                                                                                                                                                                                                                                                                                                                                                                                                                                                                                                                                                                                                                                                                                                                                                                                                                                                                                                                                                                           | 1574.7216          |                      |                |                                 |                                    |                                     |                              |                                      |                                               |          |          |         |    |          |          |          |    |          |         |         |    |         |          |          |   |          |          |         |   |          |          |         |   |          |          |          |   |          |          |          |    |         |          |         |    |         |         |          |   |         |         |         |   |         |         |         |   |         |         |          |   |         |         |         |   |         |         |          |   |         |         |          |   |         |         |          |   |         |          |          |    |         |          |         |                                                                                                                                                                                                                                                                                                                                                                                                                                                                                                                                                                                                                                                                                                                                                                                                                                                                                                                                                                                                                                                                                                                                            |         |         |         |         |         |          |          |          |          |          |          |          |          |          |          |          |          |          |          |          |          |          |          |          |          |          |           |           |           |           |           |           |           |           |           |           |           |           |           |           |           |           |           |           |           |           |           |           |
| 1615.1968                                                                                                                                                                                                                                                                                                                                                                                                                                                          | 3173.1520                                                                                                                                                                                                                                                                                                                                                                                                                                                                                                                                                                                                                                                                                                                                                                                                                                                                                                                                                                                                                                                                                                                                                                                                                                                                                                                                                                                                                                                                                                                                                                                                                                           | 3180.5180          |                      |                |                                 |                                    |                                     |                              |                                      |                                               |          |          |         |    |          |          |          |    |          |         |         |    |         |          |          |   |          |          |         |   |          |          |         |   |          |          |          |   |          |          |          |    |         |          |         |    |         |         |          |   |         |         |         |   |         |         |         |   |         |         |          |   |         |         |         |   |         |         |          |   |         |         |          |   |         |         |          |   |         |          |          |    |         |          |         |                                                                                                                                                                                                                                                                                                                                                                                                                                                                                                                                                                                                                                                                                                                                                                                                                                                                                                                                                                                                                                                                                                                                            |         |         |         |         |         |          |          |          |          |          |          |          |          |          |          |          |          |          |          |          |          |          |          |          |          |          |           |           |           |           |           |           |           |           |           |           |           |           |           |           |           |           |           |           |           |           |           |           |
| 3181.6300                                                                                                                                                                                                                                                                                                                                                                                                                                                          | 3185.6525                                                                                                                                                                                                                                                                                                                                                                                                                                                                                                                                                                                                                                                                                                                                                                                                                                                                                                                                                                                                                                                                                                                                                                                                                                                                                                                                                                                                                                                                                                                                                                                                                                           | 3271.8199          |                      |                |                                 |                                    |                                     |                              |                                      |                                               |          |          |         |    |          |          |          |    |          |         |         |    |         |          |          |   |          |          |         |   |          |          |         |   |          |          |          |   |          |          |          |    |         |          |         |    |         |         |          |   |         |         |         |   |         |         |         |   |         |         |          |   |         |         |         |   |         |         |          |   |         |         |          |   |         |         |          |   |         |          |          |    |         |          |         |                                                                                                                                                                                                                                                                                                                                                                                                                                                                                                                                                                                                                                                                                                                                                                                                                                                                                                                                                                                                                                                                                                                                            |         |         |         |         |         |          |          |          |          |          |          |          |          |          |          |          |          |          |          |          |          |          |          |          |          |          |           |           |           |           |           |           |           |           |           |           |           |           |           |           |           |           |           |           |           |           |           |           |
| 3280.7111                                                                                                                                                                                                                                                                                                                                                                                                                                                          | 3289.6790                                                                                                                                                                                                                                                                                                                                                                                                                                                                                                                                                                                                                                                                                                                                                                                                                                                                                                                                                                                                                                                                                                                                                                                                                                                                                                                                                                                                                                                                                                                                                                                                                                           | 3297.2171          |                      |                |                                 |                                    |                                     |                              |                                      |                                               |          |          |         |    |          |          |          |    |          |         |         |    |         |          |          |   |          |          |         |   |          |          |         |   |          |          |          |   |          |          |          |    |         |          |         |    |         |         |          |   |         |         |         |   |         |         |         |   |         |         |          |   |         |         |         |   |         |         |          |   |         |         |          |   |         |         |          |   |         |          |          |    |         |          |         |                                                                                                                                                                                                                                                                                                                                                                                                                                                                                                                                                                                                                                                                                                                                                                                                                                                                                                                                                                                                                                                                                                                                            |         |         |         |         |         |          |          |          |          |          |          |          |          |          |          |          |          |          |          |          |          |          |          |          |          |          |           |           |           |           |           |           |           |           |           |           |           |           |           |           |           |           |           |           |           |           |           |           |
| <p><b><u>Statistical Thermodynamic Analysis</u></b></p> <table border="0"> <tr> <td>Temperature=298.15 K</td> <td>Pressure=1 atm</td> </tr> <tr> <td>Zero-point correction= 0.116567</td> <td>Electronic Energy = -2243.56719436</td> </tr> <tr> <td>Internal Energy (E)= -2243.43473536</td> <td>Enthalpy (H)= -2243.43379136</td> </tr> <tr> <td>Gibbs Free Energy (G)=-2243.49804136</td> <td>Gibbs Free Energy of Solvation=-2243.51562026</td> </tr> </table> |                                                                                                                                                                                                                                                                                                                                                                                                                                                                                                                                                                                                                                                                                                                                                                                                                                                                                                                                                                                                                                                                                                                                                                                                                                                                                                                                                                                                                                                                                                                                                                                                                                                     |                    | Temperature=298.15 K | Pressure=1 atm | Zero-point correction= 0.116567 | Electronic Energy = -2243.56719436 | Internal Energy (E)= -2243.43473536 | Enthalpy (H)= -2243.43379136 | Gibbs Free Energy (G)=-2243.49804136 | Gibbs Free Energy of Solvation=-2243.51562026 |          |          |         |    |          |          |          |    |          |         |         |    |         |          |          |   |          |          |         |   |          |          |         |   |          |          |          |   |          |          |          |    |         |          |         |    |         |         |          |   |         |         |         |   |         |         |         |   |         |         |          |   |         |         |         |   |         |         |          |   |         |         |          |   |         |         |          |   |         |          |          |    |         |          |         |                                                                                                                                                                                                                                                                                                                                                                                                                                                                                                                                                                                                                                                                                                                                                                                                                                                                                                                                                                                                                                                                                                                                            |         |         |         |         |         |          |          |          |          |          |          |          |          |          |          |          |          |          |          |          |          |          |          |          |          |          |           |           |           |           |           |           |           |           |           |           |           |           |           |           |           |           |           |           |           |           |           |           |
| Temperature=298.15 K                                                                                                                                                                                                                                                                                                                                                                                                                                               | Pressure=1 atm                                                                                                                                                                                                                                                                                                                                                                                                                                                                                                                                                                                                                                                                                                                                                                                                                                                                                                                                                                                                                                                                                                                                                                                                                                                                                                                                                                                                                                                                                                                                                                                                                                      |                    |                      |                |                                 |                                    |                                     |                              |                                      |                                               |          |          |         |    |          |          |          |    |          |         |         |    |         |          |          |   |          |          |         |   |          |          |         |   |          |          |          |   |          |          |          |    |         |          |         |    |         |         |          |   |         |         |         |   |         |         |         |   |         |         |          |   |         |         |         |   |         |         |          |   |         |         |          |   |         |         |          |   |         |          |          |    |         |          |         |                                                                                                                                                                                                                                                                                                                                                                                                                                                                                                                                                                                                                                                                                                                                                                                                                                                                                                                                                                                                                                                                                                                                            |         |         |         |         |         |          |          |          |          |          |          |          |          |          |          |          |          |          |          |          |          |          |          |          |          |          |           |           |           |           |           |           |           |           |           |           |           |           |           |           |           |           |           |           |           |           |           |           |
| Zero-point correction= 0.116567                                                                                                                                                                                                                                                                                                                                                                                                                                    | Electronic Energy = -2243.56719436                                                                                                                                                                                                                                                                                                                                                                                                                                                                                                                                                                                                                                                                                                                                                                                                                                                                                                                                                                                                                                                                                                                                                                                                                                                                                                                                                                                                                                                                                                                                                                                                                  |                    |                      |                |                                 |                                    |                                     |                              |                                      |                                               |          |          |         |    |          |          |          |    |          |         |         |    |         |          |          |   |          |          |         |   |          |          |         |   |          |          |          |   |          |          |          |    |         |          |         |    |         |         |          |   |         |         |         |   |         |         |         |   |         |         |          |   |         |         |         |   |         |         |          |   |         |         |          |   |         |         |          |   |         |          |          |    |         |          |         |                                                                                                                                                                                                                                                                                                                                                                                                                                                                                                                                                                                                                                                                                                                                                                                                                                                                                                                                                                                                                                                                                                                                            |         |         |         |         |         |          |          |          |          |          |          |          |          |          |          |          |          |          |          |          |          |          |          |          |          |          |           |           |           |           |           |           |           |           |           |           |           |           |           |           |           |           |           |           |           |           |           |           |
| Internal Energy (E)= -2243.43473536                                                                                                                                                                                                                                                                                                                                                                                                                                | Enthalpy (H)= -2243.43379136                                                                                                                                                                                                                                                                                                                                                                                                                                                                                                                                                                                                                                                                                                                                                                                                                                                                                                                                                                                                                                                                                                                                                                                                                                                                                                                                                                                                                                                                                                                                                                                                                        |                    |                      |                |                                 |                                    |                                     |                              |                                      |                                               |          |          |         |    |          |          |          |    |          |         |         |    |         |          |          |   |          |          |         |   |          |          |         |   |          |          |          |   |          |          |          |    |         |          |         |    |         |         |          |   |         |         |         |   |         |         |         |   |         |         |          |   |         |         |         |   |         |         |          |   |         |         |          |   |         |         |          |   |         |          |          |    |         |          |         |                                                                                                                                                                                                                                                                                                                                                                                                                                                                                                                                                                                                                                                                                                                                                                                                                                                                                                                                                                                                                                                                                                                                            |         |         |         |         |         |          |          |          |          |          |          |          |          |          |          |          |          |          |          |          |          |          |          |          |          |          |           |           |           |           |           |           |           |           |           |           |           |           |           |           |           |           |           |           |           |           |           |           |
| Gibbs Free Energy (G)=-2243.49804136                                                                                                                                                                                                                                                                                                                                                                                                                               | Gibbs Free Energy of Solvation=-2243.51562026                                                                                                                                                                                                                                                                                                                                                                                                                                                                                                                                                                                                                                                                                                                                                                                                                                                                                                                                                                                                                                                                                                                                                                                                                                                                                                                                                                                                                                                                                                                                                                                                       |                    |                      |                |                                 |                                    |                                     |                              |                                      |                                               |          |          |         |    |          |          |          |    |          |         |         |    |         |          |          |   |          |          |         |   |          |          |         |   |          |          |          |   |          |          |          |    |         |          |         |    |         |         |          |   |         |         |         |   |         |         |         |   |         |         |          |   |         |         |         |   |         |         |          |   |         |         |          |   |         |         |          |   |         |          |          |    |         |          |         |                                                                                                                                                                                                                                                                                                                                                                                                                                                                                                                                                                                                                                                                                                                                                                                                                                                                                                                                                                                                                                                                                                                                            |         |         |         |         |         |          |          |          |          |          |          |          |          |          |          |          |          |          |          |          |          |          |          |          |          |          |           |           |           |           |           |           |           |           |           |           |           |           |           |           |           |           |           |           |           |           |           |           |

| St.Pt.                              | General Structure | Ball & Stick model        |          |           |           |           |
|-------------------------------------|-------------------|---------------------------|----------|-----------|-----------|-----------|
| 2PdI <sub>1</sub>                   |                   |                           |          |           |           |           |
| <b><u>Cartesian co-ordinate</u></b> |                   | <b><u>Frequencies</u></b> |          |           |           |           |
| -----<br>Atoms                      | X                 | Y                         | Z        |           |           |           |
| -----                               |                   |                           |          |           |           |           |
| C                                   | -1.30712          | -3.02946                  | -1.30221 | 4.9086    | 38.1302   | 54.9856   |
| C                                   | -0.23236          | -3.28438                  | -0.44372 | 60.2736   | 68.3103   | 75.8875   |
| Pt                                  | -0.85593          | -1.25938                  | -0.21485 | 81.0213   | 91.5131   | 97.9196   |
| Cl                                  | -2.35495          | -1.85376                  | 1.46181  | 106.4706  | 111.9953  | 128.1689  |
| Cl                                  | 0.71827           | -0.52810                  | -1.87098 | 141.4767  | 144.2890  | 149.8246  |
| H                                   | 0.79211           | -3.24572                  | -0.80050 | 151.9154  | 159.2204  | 164.0136  |
| H                                   | -0.39933          | -3.75893                  | 0.51832  | 174.2670  | 188.2062  | 192.7287  |
| H                                   | -2.31372          | -3.32046                  | -1.01913 | 202.5089  | 237.9780  | 256.1071  |
| H                                   | -1.12830          | -2.81459                  | -2.35154 | 270.9652  | 279.1257  | 285.4656  |
| Cl                                  | 2.01608           | 2.58226                   | -0.98322 | 294.4807  | 330.8986  | 342.2605  |
| Cl                                  | 2.52641           | -1.72536                  | 0.83186  | 376.6999  | 396.2285  | 404.3707  |
| H                                   | 4.57373           | 1.75685                   | 0.04604  | 440.2563  | 454.5625  | 510.1588  |
| C                                   | 4.21964           | 0.99421                   | 0.73290  | 543.4539  | 619.1336  | 620.3447  |
| C                                   | 3.24010           | 1.28601                   | 1.65162  | 662.1708  | 716.5913  | 770.8834  |
| H                                   | 4.75226           | 0.04926                   | 0.77763  | 773.5788  | 809.0700  | 825.2062  |
| H                                   | 2.99580           | 0.57492                   | 2.43524  | 831.8593  | 835.0961  | 870.8704  |
| H                                   | 2.81933           | 2.28516                   | 1.70272  | 894.8894  | 921.6999  | 947.8646  |
| C                                   | -1.66044          | 3.11718                   | -0.23012 | 963.3960  | 974.1780  | 982.1651  |
| O                                   | -0.92099          | 0.79260                   | 0.52806  | 988.6764  | 1012.9208 | 1021.2101 |
| C                                   | -1.87945          | 1.63496                   | -0.11303 | 1033.4483 | 1042.3389 | 1054.1856 |
| C                                   | -1.52973          | 2.21123                   | -1.43765 | 1056.3415 | 1067.4768 | 1080.0075 |
| H                                   | -2.28832          | 2.22042                   | -2.21499 | 1083.6428 | 1097.3141 | 1099.0948 |
| H                                   | -0.50960          | 2.05649                   | -1.77153 | 1128.0525 | 1189.4186 | 1209.4322 |
| C                                   | -3.33851          | 1.36497                   | 0.19570  | 1223.4976 | 1235.2146 | 1247.9518 |
| H                                   | -3.72571          | 0.48929                   | -0.33518 | 1268.6984 | 1294.5820 | 1298.1593 |
| C                                   | -4.04123          | 2.67699                   | -0.20263 | 1332.4585 | 1345.4981 | 1353.2084 |
| H                                   | -4.32323          | 2.64221                   | -1.25861 | 1367.8837 | 1415.6808 | 1458.2054 |
| H                                   | -4.95846          | 2.84172                   | 0.36617  | 1473.1470 | 1496.7887 | 1503.0746 |
| C                                   | -2.99685          | 3.79119                   | 0.02615  | 1509.3431 | 1530.9000 | 1577.3353 |
| H                                   | -3.17039          | 4.65719                   | -0.61901 | 1605.3902 | 2276.9481 | 2289.1690 |
|                                     |                   |                           |          | 2304.8575 | 3075.2980 | 3082.1648 |
|                                     |                   |                           |          | 3103.2446 | 3128.2811 | 3129.8435 |
|                                     |                   |                           |          | 3151.2835 | 3156.2455 | 3178.5394 |

|    |          |          |          |           |           |           |
|----|----------|----------|----------|-----------|-----------|-----------|
| H  | -3.03032 | 4.13934  | 1.06499  | 3180.8813 | 3185.4658 | 3191.5125 |
| H  | -3.44628 | 1.16885  | 1.26833  | 3209.8591 | 3255.1592 | 3277.6922 |
| H  | -0.73360 | 3.56535  | 0.11510  | 3279.2404 | 3295.7209 | 3296.4950 |
| H  | 0.29292  | -0.03522 | 2.57999  |           |           |           |
| H  | 0.28009  | 2.37020  | 2.17153  |           |           |           |
| H  | -1.74369 | 1.29515  | 2.95103  |           |           |           |
| Si | -0.51378 | 1.12229  | 2.15605  |           |           |           |
|    | 2.26837  | 0.40410  | -0.15241 |           |           |           |

**Statistical Thermodynamic Analysis**

Temperature=298.15 K

Pressure=1 atm

Zero-point correction= 0.286545

Electronic Energy = -2843.98772451

Internal Energy (E)= -2843.67550451

Enthalpy (H)= -2843.67456051

Gibbs Free Energy (G)=-2843.76050051

Gibbs Free Energy of Solvation=-2843.78123534

| St.Pt.                              | General Structure                                                                 | Ball & Stick model                                                                 |          |           |           |           |
|-------------------------------------|-----------------------------------------------------------------------------------|------------------------------------------------------------------------------------|----------|-----------|-----------|-----------|
| 2PdTS <sub>1</sub>                  | 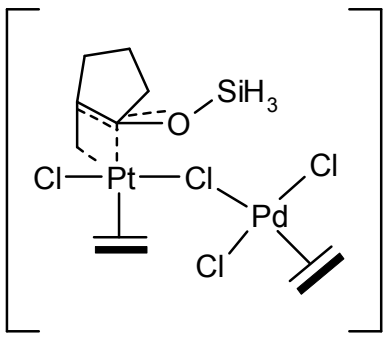 |  |          |           |           |           |
| <b><u>Cartesian co-ordinate</u></b> |                                                                                   | <b><u>Frequencies</u></b>                                                          |          |           |           |           |
| Atoms                               | X                                                                                 | Y                                                                                  | Z        | -260.2554 | 28.2388   | 34.4304   |
| C                                   | -1.94169                                                                          | -2.94566                                                                           | -0.48138 | 53.3439   | 65.1525   | 72.2075   |
| C                                   | -1.37336                                                                          | -2.68405                                                                           | 0.75107  | 84.2654   | 94.5665   | 96.5404   |
| Pt                                  | -1.43446                                                                          | -0.79092                                                                           | -0.39768 | 112.9784  | 117.4932  | 131.8344  |
| Cl                                  | -3.59497                                                                          | -0.37022                                                                           | 0.40086  | 137.8403  | 146.9629  | 153.9385  |
| Cl                                  | 0.66726                                                                           | -1.37266                                                                           | -1.44422 | 161.3269  | 163.0566  | 168.3390  |
| H                                   | -0.31386                                                                          | -2.85385                                                                           | 0.93205  | 184.5582  | 189.0382  | 193.7796  |
| H                                   | -2.01144                                                                          | -2.50984                                                                           | 1.61204  | 238.6493  | 249.0686  | 266.6427  |
| H                                   | -3.02052                                                                          | -2.97722                                                                           | -0.59306 | 269.9843  | 277.7128  | 294.8344  |
| H                                   | -1.34130                                                                          | -3.34623                                                                           | -1.29209 | 296.3252  | 304.5553  | 312.8750  |
| Cl                                  | 2.48958                                                                           | 1.50705                                                                            | -1.89451 | 324.7629  | 326.2894  | 382.5785  |
| Cl                                  | 2.30573                                                                           | -1.74986                                                                           | 1.50884  | 396.6572  | 417.9126  | 454.7965  |
| H                                   | 4.91230                                                                           | 0.70983                                                                            | -0.62044 | 490.9651  | 539.3249  | 604.5381  |
| C                                   | 4.50984                                                                           | 0.35282                                                                            | 0.32230  | 627.8643  | 691.8886  | 693.3442  |
| C                                   | 3.67934                                                                           | 1.14744                                                                            | 1.07160  | 699.4466  | 757.2907  | 771.0398  |
| H                                   | 4.88580                                                                           | -0.58330                                                                           | 0.72347  | 800.3616  | 837.8008  | 839.3131  |
| H                                   | 3.40330                                                                           | 0.84947                                                                            | 2.07778  | 844.9632  | 890.9311  | 912.2800  |
| H                                   | 3.41652                                                                           | 2.14535                                                                            | 0.73560  | 927.7121  | 941.1361  | 977.0636  |
| C                                   | -0.64642                                                                          | 2.64650                                                                            | -0.66146 | 991.5068  | 999.4573  | 1038.2792 |
| O                                   | 0.20788                                                                           | 1.37092                                                                            | 1.21974  | 1039.6723 | 1041.8924 | 1042.3179 |
| C                                   | -0.80712                                                                          | 1.92705                                                                            | 0.56501  | 1050.5029 | 1053.4308 | 1065.5024 |
| C                                   | -1.18129                                                                          | 1.23528                                                                            | -1.17493 | 1067.6749 | 1118.3763 | 1133.6083 |
| H                                   | -2.16778                                                                          | 1.38447                                                                            | -1.60864 | 1168.1414 | 1192.9035 | 1232.2251 |
| H                                   | -0.40327                                                                          | 0.94732                                                                            | -1.88212 | 1232.9973 | 1243.9639 | 1259.5522 |
| C                                   | -2.06914                                                                          | 2.37533                                                                            | 1.26829  | 1297.0167 | 1309.8285 | 1322.4497 |
| H                                   | -2.64832                                                                          | 1.57340                                                                            | 1.72611  | 1336.3426 | 1342.7005 | 1349.9192 |
| C                                   | -2.82852                                                                          | 3.18185                                                                            | 0.20942  | 1388.0750 | 1398.5297 | 1466.8662 |
| H                                   | -3.50754                                                                          | 2.51642                                                                            | -0.32939 | 1468.0578 | 1469.9098 | 1502.7760 |
| H                                   | -3.42741                                                                          | 3.97779                                                                            | 0.65421  | 1519.8947 | 1557.4416 | 1601.0153 |
| C                                   | -1.71946                                                                          | 3.72236                                                                            | -0.71605 | 1613.7732 | 2258.6556 | 2300.7724 |
| H                                   | -2.06336                                                                          | 3.91052                                                                            | -1.73591 | 2355.9737 | 3056.4754 | 3090.8211 |
| H                                   | -1.30436                                                                          | 4.65567                                                                            | -0.31972 | 3110.2512 | 3116.0391 | 3147.3829 |
| H                                   | -1.69739                                                                          | 3.03940                                                                            | 2.06210  | 3164.4873 | 3167.7124 | 3179.0334 |
| H                                   | 0.35958                                                                           | 2.83723                                                                            | -1.02579 | 3179.2464 | 3186.0696 | 3200.9507 |
| H                                   | -0.54013                                                                          | -0.74485                                                                           | 2.58210  | 3206.2898 | 3232.8256 | 3265.0003 |
| H                                   | 1.44139                                                                           | 0.56567                                                                            | 3.26517  | 3284.2037 | 3288.3021 | 3309.7075 |

|    |          |          |          |  |
|----|----------|----------|----------|--|
| H  | -0.77972 | 1.44264  | 3.59210  |  |
| Si | 0.07228  | 0.58316  | 2.73983  |  |
|    | 2.40300  | -0.15167 | -0.22353 |  |

**Statistical Thermodynamic Analysis**

Temperature=298.15 K

Pressure=1 atm

Zero-point correction= 0.284925

Electronic Energy = -2843.95963999

Internal Energy (E)= -2843.64948599

Enthalpy (H)= -2843.64854199

Gibbs Free Energy (G)=-2843.73130599

Gibbs Free Energy of Solvation=-2843.74986186

| St.Pt.                                           | General Structure                                                                 | Ball & Stick model                                                                 |                                               |           |           |           |
|--------------------------------------------------|-----------------------------------------------------------------------------------|------------------------------------------------------------------------------------|-----------------------------------------------|-----------|-----------|-----------|
| b <sub>Ni</sub>                                  | 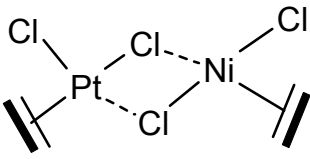 |  |                                               |           |           |           |
| <b><u>Cartesian co-ordinate</u></b>              |                                                                                   | <b><u>Frequencies</u></b>                                                          |                                               |           |           |           |
| -----<br>Atoms                                   | X                                                                                 | Y                                                                                  | Z                                             |           |           |           |
| -----                                            |                                                                                   |                                                                                    |                                               |           |           |           |
| C                                                | -2.68242                                                                          | -1.54002                                                                           | -0.70110                                      | 14.6871   | 41.1237   | 78.0032   |
| C                                                | -2.68273                                                                          | -1.54021                                                                           | 0.70052                                       | 92.0705   | 113.2494  | 114.6347  |
| Pt                                               | -1.32664                                                                          | -0.06293                                                                           | 0.00020                                       | 145.0093  | 145.1705  | 153.8490  |
| Cl                                               | -3.03444                                                                          | 1.49492                                                                            | 0.00005                                       | 174.0219  | 193.2563  | 200.5712  |
| Cl                                               | 0.54871                                                                           | -1.59230                                                                           | 0.00042                                       | 244.9249  | 264.4598  | 287.6376  |
| H                                                | -2.10368                                                                          | -2.27562                                                                           | 1.25133                                       | 301.5910  | 307.8828  | 335.7189  |
| H                                                | -3.46591                                                                          | -1.01952                                                                           | 1.24182                                       | 356.3977  | 383.3775  | 404.2843  |
| H                                                | -3.46538                                                                          | -1.01920                                                                           | -1.24261                                      | 464.8156  | 507.6859  | 771.7943  |
| H                                                | -2.10313                                                                          | -2.27528                                                                           | -1.25184                                      | 830.8142  | 847.2359  | 1023.4352 |
| Cl                                               | 3.73808                                                                           | -1.42718                                                                           | -0.00097                                      | 1053.0863 | 1057.4664 | 1065.4482 |
| Cl                                               | 0.46073                                                                           | 1.64104                                                                            | 0.00089                                       | 1075.7296 | 1078.2419 | 1230.1345 |
| H                                                | 4.30637                                                                           | 1.01051                                                                            | 1.22871                                       | 1240.3719 | 1289.5829 | 1369.3859 |
| C                                                | 3.61370                                                                           | 1.63804                                                                            | 0.67626                                       | 1468.3602 | 1479.3156 | 1581.2776 |
| C                                                | 3.61302                                                                           | 1.63806                                                                            | -0.67802                                      | 1654.5588 | 3177.1298 | 3179.0677 |
| H                                                | 2.96996                                                                           | 2.31060                                                                            | 1.23702                                       | 3182.4152 | 3184.0796 | 3275.6983 |
| H                                                | 2.96869                                                                           | 2.31062                                                                            | -1.23812                                      | 3279.7243 | 3293.1124 | 3294.1855 |
| H                                                | 4.30511                                                                           | 1.01053                                                                            | -1.23119                                      |           |           |           |
| Ni                                               | 2.13479                                                                           | 0.06075                                                                            | -0.00013                                      |           |           |           |
| H                                                | 2.55476                                                                           | -1.72213                                                                           | -0.21136                                      |           |           |           |
| Si                                               | 2.37926                                                                           | -0.34476                                                                           | 0.31169                                       |           |           |           |
| <b><u>Statistical Thermodynamic Analysis</u></b> |                                                                                   |                                                                                    |                                               |           |           |           |
| Temperature=298.15 K                             |                                                                                   |                                                                                    | Pressure=1 atm                                |           |           |           |
| Zero-point correction= 0.116884                  |                                                                                   |                                                                                    | Electronic Energy = -2286.25336720            |           |           |           |
| Internal Energy (E)= -2286.1207452               |                                                                                   |                                                                                    | Enthalpy (H)= -2286.1198012                   |           |           |           |
| Gibbs Free Energy (G)=-2286.1830642              |                                                                                   |                                                                                    | Gibbs Free Energy of Solvation=-2286.20156192 |           |           |           |

| St.Pt.           | General Structure                                                                                                                                                                                                                                                                                                                                                                                                                                                                                                                                                                                                                                                                                                                                                                                                                                                                                                                                                                                                                                                                                                                                                                                                                                                                                                                                                                                                                                                                                                                                                                                                                                                                                                                                                                                                                                                                                                                                                                                                                                                                                                                                                                                                                                                                                                                                                                                                                                                                                                                                                                         | Ball & Stick model |          |   |   |   |          |          |          |   |          |          |         |    |          |          |          |    |          |          |         |    |         |          |          |   |          |          |         |   |          |          |         |   |          |          |          |   |          |          |          |    |         |         |          |    |         |          |         |   |         |         |          |   |         |         |         |   |         |         |         |   |         |          |         |   |         |         |         |   |         |         |         |   |          |         |          |   |         |         |         |   |          |         |         |   |          |         |          |   |          |         |          |   |          |         |          |   |          |         |         |   |          |         |         |   |          |         |         |   |          |         |          |   |          |         |         |   |          |         |          |   |          |         |          |   |          |         |          |   |          |         |         |   |         |         |          |                                                                                                                                                                                                                                                                                                                                                                                                                                                                                                                                                                                                                                                                                                                                                                                                                                                                                                                                                                                                                                                                                                                                                                                                                                                                                                                                                                                                                                                                                                                                                                                                                                                                                                                                                                                                                                                                                                                                                                                                                                                                                                                                                                                                                                                                                                                                                                            |         |         |         |         |         |         |         |         |          |          |          |          |          |          |          |          |          |          |          |          |          |          |          |          |          |          |          |          |          |          |          |          |          |          |          |          |          |          |          |          |          |          |          |          |          |          |          |          |          |          |          |          |          |          |          |           |           |           |           |           |           |           |           |           |           |           |           |           |           |           |           |           |           |           |           |           |           |           |           |           |           |           |           |           |           |           |           |           |           |           |           |           |           |           |           |           |           |           |           |           |           |           |           |           |           |
|------------------|-------------------------------------------------------------------------------------------------------------------------------------------------------------------------------------------------------------------------------------------------------------------------------------------------------------------------------------------------------------------------------------------------------------------------------------------------------------------------------------------------------------------------------------------------------------------------------------------------------------------------------------------------------------------------------------------------------------------------------------------------------------------------------------------------------------------------------------------------------------------------------------------------------------------------------------------------------------------------------------------------------------------------------------------------------------------------------------------------------------------------------------------------------------------------------------------------------------------------------------------------------------------------------------------------------------------------------------------------------------------------------------------------------------------------------------------------------------------------------------------------------------------------------------------------------------------------------------------------------------------------------------------------------------------------------------------------------------------------------------------------------------------------------------------------------------------------------------------------------------------------------------------------------------------------------------------------------------------------------------------------------------------------------------------------------------------------------------------------------------------------------------------------------------------------------------------------------------------------------------------------------------------------------------------------------------------------------------------------------------------------------------------------------------------------------------------------------------------------------------------------------------------------------------------------------------------------------------------|--------------------|----------|---|---|---|----------|----------|----------|---|----------|----------|---------|----|----------|----------|----------|----|----------|----------|---------|----|---------|----------|----------|---|----------|----------|---------|---|----------|----------|---------|---|----------|----------|----------|---|----------|----------|----------|----|---------|---------|----------|----|---------|----------|---------|---|---------|---------|----------|---|---------|---------|---------|---|---------|---------|---------|---|---------|----------|---------|---|---------|---------|---------|---|---------|---------|---------|---|----------|---------|----------|---|---------|---------|---------|---|----------|---------|---------|---|----------|---------|----------|---|----------|---------|----------|---|----------|---------|----------|---|----------|---------|---------|---|----------|---------|---------|---|----------|---------|---------|---|----------|---------|----------|---|----------|---------|---------|---|----------|---------|----------|---|----------|---------|----------|---|----------|---------|----------|---|----------|---------|---------|---|---------|---------|----------|----------------------------------------------------------------------------------------------------------------------------------------------------------------------------------------------------------------------------------------------------------------------------------------------------------------------------------------------------------------------------------------------------------------------------------------------------------------------------------------------------------------------------------------------------------------------------------------------------------------------------------------------------------------------------------------------------------------------------------------------------------------------------------------------------------------------------------------------------------------------------------------------------------------------------------------------------------------------------------------------------------------------------------------------------------------------------------------------------------------------------------------------------------------------------------------------------------------------------------------------------------------------------------------------------------------------------------------------------------------------------------------------------------------------------------------------------------------------------------------------------------------------------------------------------------------------------------------------------------------------------------------------------------------------------------------------------------------------------------------------------------------------------------------------------------------------------------------------------------------------------------------------------------------------------------------------------------------------------------------------------------------------------------------------------------------------------------------------------------------------------------------------------------------------------------------------------------------------------------------------------------------------------------------------------------------------------------------------------------------------------|---------|---------|---------|---------|---------|---------|---------|---------|----------|----------|----------|----------|----------|----------|----------|----------|----------|----------|----------|----------|----------|----------|----------|----------|----------|----------|----------|----------|----------|----------|----------|----------|----------|----------|----------|----------|----------|----------|----------|----------|----------|----------|----------|----------|----------|----------|----------|----------|----------|----------|----------|----------|----------|----------|----------|-----------|-----------|-----------|-----------|-----------|-----------|-----------|-----------|-----------|-----------|-----------|-----------|-----------|-----------|-----------|-----------|-----------|-----------|-----------|-----------|-----------|-----------|-----------|-----------|-----------|-----------|-----------|-----------|-----------|-----------|-----------|-----------|-----------|-----------|-----------|-----------|-----------|-----------|-----------|-----------|-----------|-----------|-----------|-----------|-----------|-----------|-----------|-----------|-----------|-----------|
| 2Ni <sub>1</sub> |                                                                                                                                                                                                                                                                                                                                                                                                                                                                                                                                                                                                                                                                                                                                                                                                                                                                                                                                                                                                                                                                                                                                                                                                                                                                                                                                                                                                                                                                                                                                                                                                                                                                                                                                                                                                                                                                                                                                                                                                                                                                                                                                                                                                                                                                                                                                                                                                                                                                                                                                                                                           |                    |          |   |   |   |          |          |          |   |          |          |         |    |          |          |          |    |          |          |         |    |         |          |          |   |          |          |         |   |          |          |         |   |          |          |          |   |          |          |          |    |         |         |          |    |         |          |         |   |         |         |          |   |         |         |         |   |         |         |         |   |         |          |         |   |         |         |         |   |         |         |         |   |          |         |          |   |         |         |         |   |          |         |         |   |          |         |          |   |          |         |          |   |          |         |          |   |          |         |         |   |          |         |         |   |          |         |         |   |          |         |          |   |          |         |         |   |          |         |          |   |          |         |          |   |          |         |          |   |          |         |         |   |         |         |          |                                                                                                                                                                                                                                                                                                                                                                                                                                                                                                                                                                                                                                                                                                                                                                                                                                                                                                                                                                                                                                                                                                                                                                                                                                                                                                                                                                                                                                                                                                                                                                                                                                                                                                                                                                                                                                                                                                                                                                                                                                                                                                                                                                                                                                                                                                                                                                            |         |         |         |         |         |         |         |         |          |          |          |          |          |          |          |          |          |          |          |          |          |          |          |          |          |          |          |          |          |          |          |          |          |          |          |          |          |          |          |          |          |          |          |          |          |          |          |          |          |          |          |          |          |          |          |           |           |           |           |           |           |           |           |           |           |           |           |           |           |           |           |           |           |           |           |           |           |           |           |           |           |           |           |           |           |           |           |           |           |           |           |           |           |           |           |           |           |           |           |           |           |           |           |           |           |
|                  | <p style="text-align: center;"><b><u>Cartesian co-ordinate</u></b></p> <table border="1"> <thead> <tr> <th>Atoms</th> <th>X</th> <th>Y</th> <th>Z</th> </tr> </thead> <tbody> <tr><td>C</td><td>-1.80533</td><td>-2.91126</td><td>-0.47500</td></tr> <tr><td>C</td><td>-1.20007</td><td>-2.66279</td><td>0.76879</td></tr> <tr><td>Pt</td><td>-1.23498</td><td>-0.87082</td><td>-0.36959</td></tr> <tr><td>Cl</td><td>-3.34211</td><td>-0.36343</td><td>0.47568</td></tr> <tr><td>Cl</td><td>0.83709</td><td>-1.47466</td><td>-1.42120</td></tr> <tr><td>H</td><td>-0.14835</td><td>-2.88441</td><td>0.93769</td></tr> <tr><td>H</td><td>-1.82265</td><td>-2.49371</td><td>1.64226</td></tr> <tr><td>H</td><td>-2.88724</td><td>-2.94170</td><td>-0.55439</td></tr> <tr><td>H</td><td>-1.23416</td><td>-3.36635</td><td>-1.27835</td></tr> <tr><td>Cl</td><td>2.59299</td><td>1.19232</td><td>-1.92208</td></tr> <tr><td>Cl</td><td>2.23749</td><td>-1.67951</td><td>1.48899</td></tr> <tr><td>H</td><td>4.93118</td><td>0.52021</td><td>-0.56258</td></tr> <tr><td>C</td><td>4.50924</td><td>0.27005</td><td>0.40613</td></tr> <tr><td>C</td><td>3.67168</td><td>1.12460</td><td>1.03923</td></tr> <tr><td>H</td><td>4.80777</td><td>-0.66121</td><td>0.87847</td></tr> <tr><td>H</td><td>3.29890</td><td>0.89309</td><td>2.03170</td></tr> <tr><td>H</td><td>3.40482</td><td>2.07826</td><td>0.59485</td></tr> <tr><td>C</td><td>-0.28746</td><td>2.84681</td><td>-0.79161</td></tr> <tr><td>O</td><td>0.41463</td><td>1.38185</td><td>1.10270</td></tr> <tr><td>C</td><td>-0.59648</td><td>1.98166</td><td>0.34969</td></tr> <tr><td>C</td><td>-0.88106</td><td>1.43732</td><td>-1.09334</td></tr> <tr><td>H</td><td>-1.88628</td><td>1.44491</td><td>-1.50639</td></tr> <tr><td>H</td><td>-0.10397</td><td>0.92453</td><td>-1.65885</td></tr> <tr><td>C</td><td>-1.78726</td><td>2.59862</td><td>1.07629</td></tr> <tr><td>H</td><td>-2.46693</td><td>1.87065</td><td>1.52362</td></tr> <tr><td>C</td><td>-2.45531</td><td>3.49604</td><td>0.02799</td></tr> <tr><td>H</td><td>-3.16809</td><td>2.91365</td><td>-0.56328</td></tr> <tr><td>H</td><td>-3.01085</td><td>4.31663</td><td>0.48525</td></tr> <tr><td>C</td><td>-1.28519</td><td>3.98629</td><td>-0.84577</td></tr> <tr><td>H</td><td>-1.58626</td><td>4.23957</td><td>-1.86563</td></tr> <tr><td>H</td><td>-0.82036</td><td>4.87475</td><td>-0.40316</td></tr> <tr><td>H</td><td>-1.36183</td><td>3.21882</td><td>1.87400</td></tr> <tr><td>H</td><td>0.73455</td><td>2.95587</td><td>-1.13762</td></tr> </tbody> </table> | Atoms              | X        | Y | Z | C | -1.80533 | -2.91126 | -0.47500 | C | -1.20007 | -2.66279 | 0.76879 | Pt | -1.23498 | -0.87082 | -0.36959 | Cl | -3.34211 | -0.36343 | 0.47568 | Cl | 0.83709 | -1.47466 | -1.42120 | H | -0.14835 | -2.88441 | 0.93769 | H | -1.82265 | -2.49371 | 1.64226 | H | -2.88724 | -2.94170 | -0.55439 | H | -1.23416 | -3.36635 | -1.27835 | Cl | 2.59299 | 1.19232 | -1.92208 | Cl | 2.23749 | -1.67951 | 1.48899 | H | 4.93118 | 0.52021 | -0.56258 | C | 4.50924 | 0.27005 | 0.40613 | C | 3.67168 | 1.12460 | 1.03923 | H | 4.80777 | -0.66121 | 0.87847 | H | 3.29890 | 0.89309 | 2.03170 | H | 3.40482 | 2.07826 | 0.59485 | C | -0.28746 | 2.84681 | -0.79161 | O | 0.41463 | 1.38185 | 1.10270 | C | -0.59648 | 1.98166 | 0.34969 | C | -0.88106 | 1.43732 | -1.09334 | H | -1.88628 | 1.44491 | -1.50639 | H | -0.10397 | 0.92453 | -1.65885 | C | -1.78726 | 2.59862 | 1.07629 | H | -2.46693 | 1.87065 | 1.52362 | C | -2.45531 | 3.49604 | 0.02799 | H | -3.16809 | 2.91365 | -0.56328 | H | -3.01085 | 4.31663 | 0.48525 | C | -1.28519 | 3.98629 | -0.84577 | H | -1.58626 | 4.23957 | -1.86563 | H | -0.82036 | 4.87475 | -0.40316 | H | -1.36183 | 3.21882 | 1.87400 | H | 0.73455 | 2.95587 | -1.13762 | <p style="text-align: center;"><b><u>Frequencies</u></b></p> <table border="1"> <tbody> <tr><td>30.6420</td><td>35.4141</td><td>60.5301</td></tr> <tr><td>68.7886</td><td>79.1947</td><td>83.2552</td></tr> <tr><td>93.9088</td><td>98.4002</td><td>104.8874</td></tr> <tr><td>112.6498</td><td>120.9339</td><td>138.9200</td></tr> <tr><td>147.3202</td><td>154.7082</td><td>156.5706</td></tr> <tr><td>169.7077</td><td>180.7643</td><td>186.6909</td></tr> <tr><td>196.6483</td><td>204.1934</td><td>209.9419</td></tr> <tr><td>241.5591</td><td>256.0979</td><td>259.0343</td></tr> <tr><td>283.3132</td><td>294.7099</td><td>299.3715</td></tr> <tr><td>315.2638</td><td>322.5303</td><td>342.2406</td></tr> <tr><td>355.0341</td><td>378.1273</td><td>399.7907</td></tr> <tr><td>409.1794</td><td>465.5319</td><td>467.9203</td></tr> <tr><td>508.7802</td><td>534.5639</td><td>627.3461</td></tr> <tr><td>635.4735</td><td>722.8822</td><td>745.3724</td></tr> <tr><td>759.2724</td><td>781.7043</td><td>814.2947</td></tr> <tr><td>817.7997</td><td>840.2448</td><td>859.5514</td></tr> <tr><td>897.7097</td><td>907.2461</td><td>929.6611</td></tr> <tr><td>934.6442</td><td>955.6379</td><td>961.6924</td></tr> <tr><td>996.3577</td><td>1005.0683</td><td>1020.0098</td></tr> <tr><td>1026.2404</td><td>1039.5282</td><td>1048.1171</td></tr> <tr><td>1058.2914</td><td>1063.1750</td><td>1085.8840</td></tr> <tr><td>1096.0103</td><td>1100.4278</td><td>1115.9262</td></tr> <tr><td>1140.4784</td><td>1176.8284</td><td>1220.8614</td></tr> <tr><td>1226.0971</td><td>1232.8538</td><td>1265.6482</td></tr> <tr><td>1270.8594</td><td>1281.8584</td><td>1288.5556</td></tr> <tr><td>1342.0840</td><td>1352.7470</td><td>1361.2473</td></tr> <tr><td>1366.1764</td><td>1413.3750</td><td>1456.7034</td></tr> <tr><td>1473.1722</td><td>1484.9250</td><td>1497.9599</td></tr> <tr><td>1502.4645</td><td>1527.4084</td><td>1569.7373</td></tr> <tr><td>1651.4104</td><td>2273.5073</td><td>2290.4501</td></tr> <tr><td>2314.7930</td><td>3078.0602</td><td>3080.5707</td></tr> <tr><td>3101.5395</td><td>3129.3293</td><td>3139.5187</td></tr> <tr><td>3160.4829</td><td>3171.4812</td><td>3173.7768</td></tr> <tr><td>3178.6361</td><td>3182.6752</td><td>3185.9678</td></tr> <tr><td>3223.3172</td><td>3238.4368</td><td>3272.8299</td></tr> </tbody> </table> | 30.6420 | 35.4141 | 60.5301 | 68.7886 | 79.1947 | 83.2552 | 93.9088 | 98.4002 | 104.8874 | 112.6498 | 120.9339 | 138.9200 | 147.3202 | 154.7082 | 156.5706 | 169.7077 | 180.7643 | 186.6909 | 196.6483 | 204.1934 | 209.9419 | 241.5591 | 256.0979 | 259.0343 | 283.3132 | 294.7099 | 299.3715 | 315.2638 | 322.5303 | 342.2406 | 355.0341 | 378.1273 | 399.7907 | 409.1794 | 465.5319 | 467.9203 | 508.7802 | 534.5639 | 627.3461 | 635.4735 | 722.8822 | 745.3724 | 759.2724 | 781.7043 | 814.2947 | 817.7997 | 840.2448 | 859.5514 | 897.7097 | 907.2461 | 929.6611 | 934.6442 | 955.6379 | 961.6924 | 996.3577 | 1005.0683 | 1020.0098 | 1026.2404 | 1039.5282 | 1048.1171 | 1058.2914 | 1063.1750 | 1085.8840 | 1096.0103 | 1100.4278 | 1115.9262 | 1140.4784 | 1176.8284 | 1220.8614 | 1226.0971 | 1232.8538 | 1265.6482 | 1270.8594 | 1281.8584 | 1288.5556 | 1342.0840 | 1352.7470 | 1361.2473 | 1366.1764 | 1413.3750 | 1456.7034 | 1473.1722 | 1484.9250 | 1497.9599 | 1502.4645 | 1527.4084 | 1569.7373 | 1651.4104 | 2273.5073 | 2290.4501 | 2314.7930 | 3078.0602 | 3080.5707 | 3101.5395 | 3129.3293 | 3139.5187 | 3160.4829 | 3171.4812 | 3173.7768 | 3178.6361 | 3182.6752 | 3185.9678 | 3223.3172 | 3238.4368 | 3272.8299 |
| Atoms            | X                                                                                                                                                                                                                                                                                                                                                                                                                                                                                                                                                                                                                                                                                                                                                                                                                                                                                                                                                                                                                                                                                                                                                                                                                                                                                                                                                                                                                                                                                                                                                                                                                                                                                                                                                                                                                                                                                                                                                                                                                                                                                                                                                                                                                                                                                                                                                                                                                                                                                                                                                                                         | Y                  | Z        |   |   |   |          |          |          |   |          |          |         |    |          |          |          |    |          |          |         |    |         |          |          |   |          |          |         |   |          |          |         |   |          |          |          |   |          |          |          |    |         |         |          |    |         |          |         |   |         |         |          |   |         |         |         |   |         |         |         |   |         |          |         |   |         |         |         |   |         |         |         |   |          |         |          |   |         |         |         |   |          |         |         |   |          |         |          |   |          |         |          |   |          |         |          |   |          |         |         |   |          |         |         |   |          |         |         |   |          |         |          |   |          |         |         |   |          |         |          |   |          |         |          |   |          |         |          |   |          |         |         |   |         |         |          |                                                                                                                                                                                                                                                                                                                                                                                                                                                                                                                                                                                                                                                                                                                                                                                                                                                                                                                                                                                                                                                                                                                                                                                                                                                                                                                                                                                                                                                                                                                                                                                                                                                                                                                                                                                                                                                                                                                                                                                                                                                                                                                                                                                                                                                                                                                                                                            |         |         |         |         |         |         |         |         |          |          |          |          |          |          |          |          |          |          |          |          |          |          |          |          |          |          |          |          |          |          |          |          |          |          |          |          |          |          |          |          |          |          |          |          |          |          |          |          |          |          |          |          |          |          |          |           |           |           |           |           |           |           |           |           |           |           |           |           |           |           |           |           |           |           |           |           |           |           |           |           |           |           |           |           |           |           |           |           |           |           |           |           |           |           |           |           |           |           |           |           |           |           |           |           |           |
| C                | -1.80533                                                                                                                                                                                                                                                                                                                                                                                                                                                                                                                                                                                                                                                                                                                                                                                                                                                                                                                                                                                                                                                                                                                                                                                                                                                                                                                                                                                                                                                                                                                                                                                                                                                                                                                                                                                                                                                                                                                                                                                                                                                                                                                                                                                                                                                                                                                                                                                                                                                                                                                                                                                  | -2.91126           | -0.47500 |   |   |   |          |          |          |   |          |          |         |    |          |          |          |    |          |          |         |    |         |          |          |   |          |          |         |   |          |          |         |   |          |          |          |   |          |          |          |    |         |         |          |    |         |          |         |   |         |         |          |   |         |         |         |   |         |         |         |   |         |          |         |   |         |         |         |   |         |         |         |   |          |         |          |   |         |         |         |   |          |         |         |   |          |         |          |   |          |         |          |   |          |         |          |   |          |         |         |   |          |         |         |   |          |         |         |   |          |         |          |   |          |         |         |   |          |         |          |   |          |         |          |   |          |         |          |   |          |         |         |   |         |         |          |                                                                                                                                                                                                                                                                                                                                                                                                                                                                                                                                                                                                                                                                                                                                                                                                                                                                                                                                                                                                                                                                                                                                                                                                                                                                                                                                                                                                                                                                                                                                                                                                                                                                                                                                                                                                                                                                                                                                                                                                                                                                                                                                                                                                                                                                                                                                                                            |         |         |         |         |         |         |         |         |          |          |          |          |          |          |          |          |          |          |          |          |          |          |          |          |          |          |          |          |          |          |          |          |          |          |          |          |          |          |          |          |          |          |          |          |          |          |          |          |          |          |          |          |          |          |          |           |           |           |           |           |           |           |           |           |           |           |           |           |           |           |           |           |           |           |           |           |           |           |           |           |           |           |           |           |           |           |           |           |           |           |           |           |           |           |           |           |           |           |           |           |           |           |           |           |           |
| C                | -1.20007                                                                                                                                                                                                                                                                                                                                                                                                                                                                                                                                                                                                                                                                                                                                                                                                                                                                                                                                                                                                                                                                                                                                                                                                                                                                                                                                                                                                                                                                                                                                                                                                                                                                                                                                                                                                                                                                                                                                                                                                                                                                                                                                                                                                                                                                                                                                                                                                                                                                                                                                                                                  | -2.66279           | 0.76879  |   |   |   |          |          |          |   |          |          |         |    |          |          |          |    |          |          |         |    |         |          |          |   |          |          |         |   |          |          |         |   |          |          |          |   |          |          |          |    |         |         |          |    |         |          |         |   |         |         |          |   |         |         |         |   |         |         |         |   |         |          |         |   |         |         |         |   |         |         |         |   |          |         |          |   |         |         |         |   |          |         |         |   |          |         |          |   |          |         |          |   |          |         |          |   |          |         |         |   |          |         |         |   |          |         |         |   |          |         |          |   |          |         |         |   |          |         |          |   |          |         |          |   |          |         |          |   |          |         |         |   |         |         |          |                                                                                                                                                                                                                                                                                                                                                                                                                                                                                                                                                                                                                                                                                                                                                                                                                                                                                                                                                                                                                                                                                                                                                                                                                                                                                                                                                                                                                                                                                                                                                                                                                                                                                                                                                                                                                                                                                                                                                                                                                                                                                                                                                                                                                                                                                                                                                                            |         |         |         |         |         |         |         |         |          |          |          |          |          |          |          |          |          |          |          |          |          |          |          |          |          |          |          |          |          |          |          |          |          |          |          |          |          |          |          |          |          |          |          |          |          |          |          |          |          |          |          |          |          |          |          |           |           |           |           |           |           |           |           |           |           |           |           |           |           |           |           |           |           |           |           |           |           |           |           |           |           |           |           |           |           |           |           |           |           |           |           |           |           |           |           |           |           |           |           |           |           |           |           |           |           |
| Pt               | -1.23498                                                                                                                                                                                                                                                                                                                                                                                                                                                                                                                                                                                                                                                                                                                                                                                                                                                                                                                                                                                                                                                                                                                                                                                                                                                                                                                                                                                                                                                                                                                                                                                                                                                                                                                                                                                                                                                                                                                                                                                                                                                                                                                                                                                                                                                                                                                                                                                                                                                                                                                                                                                  | -0.87082           | -0.36959 |   |   |   |          |          |          |   |          |          |         |    |          |          |          |    |          |          |         |    |         |          |          |   |          |          |         |   |          |          |         |   |          |          |          |   |          |          |          |    |         |         |          |    |         |          |         |   |         |         |          |   |         |         |         |   |         |         |         |   |         |          |         |   |         |         |         |   |         |         |         |   |          |         |          |   |         |         |         |   |          |         |         |   |          |         |          |   |          |         |          |   |          |         |          |   |          |         |         |   |          |         |         |   |          |         |         |   |          |         |          |   |          |         |         |   |          |         |          |   |          |         |          |   |          |         |          |   |          |         |         |   |         |         |          |                                                                                                                                                                                                                                                                                                                                                                                                                                                                                                                                                                                                                                                                                                                                                                                                                                                                                                                                                                                                                                                                                                                                                                                                                                                                                                                                                                                                                                                                                                                                                                                                                                                                                                                                                                                                                                                                                                                                                                                                                                                                                                                                                                                                                                                                                                                                                                            |         |         |         |         |         |         |         |         |          |          |          |          |          |          |          |          |          |          |          |          |          |          |          |          |          |          |          |          |          |          |          |          |          |          |          |          |          |          |          |          |          |          |          |          |          |          |          |          |          |          |          |          |          |          |          |           |           |           |           |           |           |           |           |           |           |           |           |           |           |           |           |           |           |           |           |           |           |           |           |           |           |           |           |           |           |           |           |           |           |           |           |           |           |           |           |           |           |           |           |           |           |           |           |           |           |
| Cl               | -3.34211                                                                                                                                                                                                                                                                                                                                                                                                                                                                                                                                                                                                                                                                                                                                                                                                                                                                                                                                                                                                                                                                                                                                                                                                                                                                                                                                                                                                                                                                                                                                                                                                                                                                                                                                                                                                                                                                                                                                                                                                                                                                                                                                                                                                                                                                                                                                                                                                                                                                                                                                                                                  | -0.36343           | 0.47568  |   |   |   |          |          |          |   |          |          |         |    |          |          |          |    |          |          |         |    |         |          |          |   |          |          |         |   |          |          |         |   |          |          |          |   |          |          |          |    |         |         |          |    |         |          |         |   |         |         |          |   |         |         |         |   |         |         |         |   |         |          |         |   |         |         |         |   |         |         |         |   |          |         |          |   |         |         |         |   |          |         |         |   |          |         |          |   |          |         |          |   |          |         |          |   |          |         |         |   |          |         |         |   |          |         |         |   |          |         |          |   |          |         |         |   |          |         |          |   |          |         |          |   |          |         |          |   |          |         |         |   |         |         |          |                                                                                                                                                                                                                                                                                                                                                                                                                                                                                                                                                                                                                                                                                                                                                                                                                                                                                                                                                                                                                                                                                                                                                                                                                                                                                                                                                                                                                                                                                                                                                                                                                                                                                                                                                                                                                                                                                                                                                                                                                                                                                                                                                                                                                                                                                                                                                                            |         |         |         |         |         |         |         |         |          |          |          |          |          |          |          |          |          |          |          |          |          |          |          |          |          |          |          |          |          |          |          |          |          |          |          |          |          |          |          |          |          |          |          |          |          |          |          |          |          |          |          |          |          |          |          |           |           |           |           |           |           |           |           |           |           |           |           |           |           |           |           |           |           |           |           |           |           |           |           |           |           |           |           |           |           |           |           |           |           |           |           |           |           |           |           |           |           |           |           |           |           |           |           |           |           |
| Cl               | 0.83709                                                                                                                                                                                                                                                                                                                                                                                                                                                                                                                                                                                                                                                                                                                                                                                                                                                                                                                                                                                                                                                                                                                                                                                                                                                                                                                                                                                                                                                                                                                                                                                                                                                                                                                                                                                                                                                                                                                                                                                                                                                                                                                                                                                                                                                                                                                                                                                                                                                                                                                                                                                   | -1.47466           | -1.42120 |   |   |   |          |          |          |   |          |          |         |    |          |          |          |    |          |          |         |    |         |          |          |   |          |          |         |   |          |          |         |   |          |          |          |   |          |          |          |    |         |         |          |    |         |          |         |   |         |         |          |   |         |         |         |   |         |         |         |   |         |          |         |   |         |         |         |   |         |         |         |   |          |         |          |   |         |         |         |   |          |         |         |   |          |         |          |   |          |         |          |   |          |         |          |   |          |         |         |   |          |         |         |   |          |         |         |   |          |         |          |   |          |         |         |   |          |         |          |   |          |         |          |   |          |         |          |   |          |         |         |   |         |         |          |                                                                                                                                                                                                                                                                                                                                                                                                                                                                                                                                                                                                                                                                                                                                                                                                                                                                                                                                                                                                                                                                                                                                                                                                                                                                                                                                                                                                                                                                                                                                                                                                                                                                                                                                                                                                                                                                                                                                                                                                                                                                                                                                                                                                                                                                                                                                                                            |         |         |         |         |         |         |         |         |          |          |          |          |          |          |          |          |          |          |          |          |          |          |          |          |          |          |          |          |          |          |          |          |          |          |          |          |          |          |          |          |          |          |          |          |          |          |          |          |          |          |          |          |          |          |          |           |           |           |           |           |           |           |           |           |           |           |           |           |           |           |           |           |           |           |           |           |           |           |           |           |           |           |           |           |           |           |           |           |           |           |           |           |           |           |           |           |           |           |           |           |           |           |           |           |           |
| H                | -0.14835                                                                                                                                                                                                                                                                                                                                                                                                                                                                                                                                                                                                                                                                                                                                                                                                                                                                                                                                                                                                                                                                                                                                                                                                                                                                                                                                                                                                                                                                                                                                                                                                                                                                                                                                                                                                                                                                                                                                                                                                                                                                                                                                                                                                                                                                                                                                                                                                                                                                                                                                                                                  | -2.88441           | 0.93769  |   |   |   |          |          |          |   |          |          |         |    |          |          |          |    |          |          |         |    |         |          |          |   |          |          |         |   |          |          |         |   |          |          |          |   |          |          |          |    |         |         |          |    |         |          |         |   |         |         |          |   |         |         |         |   |         |         |         |   |         |          |         |   |         |         |         |   |         |         |         |   |          |         |          |   |         |         |         |   |          |         |         |   |          |         |          |   |          |         |          |   |          |         |          |   |          |         |         |   |          |         |         |   |          |         |         |   |          |         |          |   |          |         |         |   |          |         |          |   |          |         |          |   |          |         |          |   |          |         |         |   |         |         |          |                                                                                                                                                                                                                                                                                                                                                                                                                                                                                                                                                                                                                                                                                                                                                                                                                                                                                                                                                                                                                                                                                                                                                                                                                                                                                                                                                                                                                                                                                                                                                                                                                                                                                                                                                                                                                                                                                                                                                                                                                                                                                                                                                                                                                                                                                                                                                                            |         |         |         |         |         |         |         |         |          |          |          |          |          |          |          |          |          |          |          |          |          |          |          |          |          |          |          |          |          |          |          |          |          |          |          |          |          |          |          |          |          |          |          |          |          |          |          |          |          |          |          |          |          |          |          |           |           |           |           |           |           |           |           |           |           |           |           |           |           |           |           |           |           |           |           |           |           |           |           |           |           |           |           |           |           |           |           |           |           |           |           |           |           |           |           |           |           |           |           |           |           |           |           |           |           |
| H                | -1.82265                                                                                                                                                                                                                                                                                                                                                                                                                                                                                                                                                                                                                                                                                                                                                                                                                                                                                                                                                                                                                                                                                                                                                                                                                                                                                                                                                                                                                                                                                                                                                                                                                                                                                                                                                                                                                                                                                                                                                                                                                                                                                                                                                                                                                                                                                                                                                                                                                                                                                                                                                                                  | -2.49371           | 1.64226  |   |   |   |          |          |          |   |          |          |         |    |          |          |          |    |          |          |         |    |         |          |          |   |          |          |         |   |          |          |         |   |          |          |          |   |          |          |          |    |         |         |          |    |         |          |         |   |         |         |          |   |         |         |         |   |         |         |         |   |         |          |         |   |         |         |         |   |         |         |         |   |          |         |          |   |         |         |         |   |          |         |         |   |          |         |          |   |          |         |          |   |          |         |          |   |          |         |         |   |          |         |         |   |          |         |         |   |          |         |          |   |          |         |         |   |          |         |          |   |          |         |          |   |          |         |          |   |          |         |         |   |         |         |          |                                                                                                                                                                                                                                                                                                                                                                                                                                                                                                                                                                                                                                                                                                                                                                                                                                                                                                                                                                                                                                                                                                                                                                                                                                                                                                                                                                                                                                                                                                                                                                                                                                                                                                                                                                                                                                                                                                                                                                                                                                                                                                                                                                                                                                                                                                                                                                            |         |         |         |         |         |         |         |         |          |          |          |          |          |          |          |          |          |          |          |          |          |          |          |          |          |          |          |          |          |          |          |          |          |          |          |          |          |          |          |          |          |          |          |          |          |          |          |          |          |          |          |          |          |          |          |           |           |           |           |           |           |           |           |           |           |           |           |           |           |           |           |           |           |           |           |           |           |           |           |           |           |           |           |           |           |           |           |           |           |           |           |           |           |           |           |           |           |           |           |           |           |           |           |           |           |
| H                | -2.88724                                                                                                                                                                                                                                                                                                                                                                                                                                                                                                                                                                                                                                                                                                                                                                                                                                                                                                                                                                                                                                                                                                                                                                                                                                                                                                                                                                                                                                                                                                                                                                                                                                                                                                                                                                                                                                                                                                                                                                                                                                                                                                                                                                                                                                                                                                                                                                                                                                                                                                                                                                                  | -2.94170           | -0.55439 |   |   |   |          |          |          |   |          |          |         |    |          |          |          |    |          |          |         |    |         |          |          |   |          |          |         |   |          |          |         |   |          |          |          |   |          |          |          |    |         |         |          |    |         |          |         |   |         |         |          |   |         |         |         |   |         |         |         |   |         |          |         |   |         |         |         |   |         |         |         |   |          |         |          |   |         |         |         |   |          |         |         |   |          |         |          |   |          |         |          |   |          |         |          |   |          |         |         |   |          |         |         |   |          |         |         |   |          |         |          |   |          |         |         |   |          |         |          |   |          |         |          |   |          |         |          |   |          |         |         |   |         |         |          |                                                                                                                                                                                                                                                                                                                                                                                                                                                                                                                                                                                                                                                                                                                                                                                                                                                                                                                                                                                                                                                                                                                                                                                                                                                                                                                                                                                                                                                                                                                                                                                                                                                                                                                                                                                                                                                                                                                                                                                                                                                                                                                                                                                                                                                                                                                                                                            |         |         |         |         |         |         |         |         |          |          |          |          |          |          |          |          |          |          |          |          |          |          |          |          |          |          |          |          |          |          |          |          |          |          |          |          |          |          |          |          |          |          |          |          |          |          |          |          |          |          |          |          |          |          |          |           |           |           |           |           |           |           |           |           |           |           |           |           |           |           |           |           |           |           |           |           |           |           |           |           |           |           |           |           |           |           |           |           |           |           |           |           |           |           |           |           |           |           |           |           |           |           |           |           |           |
| H                | -1.23416                                                                                                                                                                                                                                                                                                                                                                                                                                                                                                                                                                                                                                                                                                                                                                                                                                                                                                                                                                                                                                                                                                                                                                                                                                                                                                                                                                                                                                                                                                                                                                                                                                                                                                                                                                                                                                                                                                                                                                                                                                                                                                                                                                                                                                                                                                                                                                                                                                                                                                                                                                                  | -3.36635           | -1.27835 |   |   |   |          |          |          |   |          |          |         |    |          |          |          |    |          |          |         |    |         |          |          |   |          |          |         |   |          |          |         |   |          |          |          |   |          |          |          |    |         |         |          |    |         |          |         |   |         |         |          |   |         |         |         |   |         |         |         |   |         |          |         |   |         |         |         |   |         |         |         |   |          |         |          |   |         |         |         |   |          |         |         |   |          |         |          |   |          |         |          |   |          |         |          |   |          |         |         |   |          |         |         |   |          |         |         |   |          |         |          |   |          |         |         |   |          |         |          |   |          |         |          |   |          |         |          |   |          |         |         |   |         |         |          |                                                                                                                                                                                                                                                                                                                                                                                                                                                                                                                                                                                                                                                                                                                                                                                                                                                                                                                                                                                                                                                                                                                                                                                                                                                                                                                                                                                                                                                                                                                                                                                                                                                                                                                                                                                                                                                                                                                                                                                                                                                                                                                                                                                                                                                                                                                                                                            |         |         |         |         |         |         |         |         |          |          |          |          |          |          |          |          |          |          |          |          |          |          |          |          |          |          |          |          |          |          |          |          |          |          |          |          |          |          |          |          |          |          |          |          |          |          |          |          |          |          |          |          |          |          |          |           |           |           |           |           |           |           |           |           |           |           |           |           |           |           |           |           |           |           |           |           |           |           |           |           |           |           |           |           |           |           |           |           |           |           |           |           |           |           |           |           |           |           |           |           |           |           |           |           |           |
| Cl               | 2.59299                                                                                                                                                                                                                                                                                                                                                                                                                                                                                                                                                                                                                                                                                                                                                                                                                                                                                                                                                                                                                                                                                                                                                                                                                                                                                                                                                                                                                                                                                                                                                                                                                                                                                                                                                                                                                                                                                                                                                                                                                                                                                                                                                                                                                                                                                                                                                                                                                                                                                                                                                                                   | 1.19232            | -1.92208 |   |   |   |          |          |          |   |          |          |         |    |          |          |          |    |          |          |         |    |         |          |          |   |          |          |         |   |          |          |         |   |          |          |          |   |          |          |          |    |         |         |          |    |         |          |         |   |         |         |          |   |         |         |         |   |         |         |         |   |         |          |         |   |         |         |         |   |         |         |         |   |          |         |          |   |         |         |         |   |          |         |         |   |          |         |          |   |          |         |          |   |          |         |          |   |          |         |         |   |          |         |         |   |          |         |         |   |          |         |          |   |          |         |         |   |          |         |          |   |          |         |          |   |          |         |          |   |          |         |         |   |         |         |          |                                                                                                                                                                                                                                                                                                                                                                                                                                                                                                                                                                                                                                                                                                                                                                                                                                                                                                                                                                                                                                                                                                                                                                                                                                                                                                                                                                                                                                                                                                                                                                                                                                                                                                                                                                                                                                                                                                                                                                                                                                                                                                                                                                                                                                                                                                                                                                            |         |         |         |         |         |         |         |         |          |          |          |          |          |          |          |          |          |          |          |          |          |          |          |          |          |          |          |          |          |          |          |          |          |          |          |          |          |          |          |          |          |          |          |          |          |          |          |          |          |          |          |          |          |          |          |           |           |           |           |           |           |           |           |           |           |           |           |           |           |           |           |           |           |           |           |           |           |           |           |           |           |           |           |           |           |           |           |           |           |           |           |           |           |           |           |           |           |           |           |           |           |           |           |           |           |
| Cl               | 2.23749                                                                                                                                                                                                                                                                                                                                                                                                                                                                                                                                                                                                                                                                                                                                                                                                                                                                                                                                                                                                                                                                                                                                                                                                                                                                                                                                                                                                                                                                                                                                                                                                                                                                                                                                                                                                                                                                                                                                                                                                                                                                                                                                                                                                                                                                                                                                                                                                                                                                                                                                                                                   | -1.67951           | 1.48899  |   |   |   |          |          |          |   |          |          |         |    |          |          |          |    |          |          |         |    |         |          |          |   |          |          |         |   |          |          |         |   |          |          |          |   |          |          |          |    |         |         |          |    |         |          |         |   |         |         |          |   |         |         |         |   |         |         |         |   |         |          |         |   |         |         |         |   |         |         |         |   |          |         |          |   |         |         |         |   |          |         |         |   |          |         |          |   |          |         |          |   |          |         |          |   |          |         |         |   |          |         |         |   |          |         |         |   |          |         |          |   |          |         |         |   |          |         |          |   |          |         |          |   |          |         |          |   |          |         |         |   |         |         |          |                                                                                                                                                                                                                                                                                                                                                                                                                                                                                                                                                                                                                                                                                                                                                                                                                                                                                                                                                                                                                                                                                                                                                                                                                                                                                                                                                                                                                                                                                                                                                                                                                                                                                                                                                                                                                                                                                                                                                                                                                                                                                                                                                                                                                                                                                                                                                                            |         |         |         |         |         |         |         |         |          |          |          |          |          |          |          |          |          |          |          |          |          |          |          |          |          |          |          |          |          |          |          |          |          |          |          |          |          |          |          |          |          |          |          |          |          |          |          |          |          |          |          |          |          |          |          |           |           |           |           |           |           |           |           |           |           |           |           |           |           |           |           |           |           |           |           |           |           |           |           |           |           |           |           |           |           |           |           |           |           |           |           |           |           |           |           |           |           |           |           |           |           |           |           |           |           |
| H                | 4.93118                                                                                                                                                                                                                                                                                                                                                                                                                                                                                                                                                                                                                                                                                                                                                                                                                                                                                                                                                                                                                                                                                                                                                                                                                                                                                                                                                                                                                                                                                                                                                                                                                                                                                                                                                                                                                                                                                                                                                                                                                                                                                                                                                                                                                                                                                                                                                                                                                                                                                                                                                                                   | 0.52021            | -0.56258 |   |   |   |          |          |          |   |          |          |         |    |          |          |          |    |          |          |         |    |         |          |          |   |          |          |         |   |          |          |         |   |          |          |          |   |          |          |          |    |         |         |          |    |         |          |         |   |         |         |          |   |         |         |         |   |         |         |         |   |         |          |         |   |         |         |         |   |         |         |         |   |          |         |          |   |         |         |         |   |          |         |         |   |          |         |          |   |          |         |          |   |          |         |          |   |          |         |         |   |          |         |         |   |          |         |         |   |          |         |          |   |          |         |         |   |          |         |          |   |          |         |          |   |          |         |          |   |          |         |         |   |         |         |          |                                                                                                                                                                                                                                                                                                                                                                                                                                                                                                                                                                                                                                                                                                                                                                                                                                                                                                                                                                                                                                                                                                                                                                                                                                                                                                                                                                                                                                                                                                                                                                                                                                                                                                                                                                                                                                                                                                                                                                                                                                                                                                                                                                                                                                                                                                                                                                            |         |         |         |         |         |         |         |         |          |          |          |          |          |          |          |          |          |          |          |          |          |          |          |          |          |          |          |          |          |          |          |          |          |          |          |          |          |          |          |          |          |          |          |          |          |          |          |          |          |          |          |          |          |          |          |           |           |           |           |           |           |           |           |           |           |           |           |           |           |           |           |           |           |           |           |           |           |           |           |           |           |           |           |           |           |           |           |           |           |           |           |           |           |           |           |           |           |           |           |           |           |           |           |           |           |
| C                | 4.50924                                                                                                                                                                                                                                                                                                                                                                                                                                                                                                                                                                                                                                                                                                                                                                                                                                                                                                                                                                                                                                                                                                                                                                                                                                                                                                                                                                                                                                                                                                                                                                                                                                                                                                                                                                                                                                                                                                                                                                                                                                                                                                                                                                                                                                                                                                                                                                                                                                                                                                                                                                                   | 0.27005            | 0.40613  |   |   |   |          |          |          |   |          |          |         |    |          |          |          |    |          |          |         |    |         |          |          |   |          |          |         |   |          |          |         |   |          |          |          |   |          |          |          |    |         |         |          |    |         |          |         |   |         |         |          |   |         |         |         |   |         |         |         |   |         |          |         |   |         |         |         |   |         |         |         |   |          |         |          |   |         |         |         |   |          |         |         |   |          |         |          |   |          |         |          |   |          |         |          |   |          |         |         |   |          |         |         |   |          |         |         |   |          |         |          |   |          |         |         |   |          |         |          |   |          |         |          |   |          |         |          |   |          |         |         |   |         |         |          |                                                                                                                                                                                                                                                                                                                                                                                                                                                                                                                                                                                                                                                                                                                                                                                                                                                                                                                                                                                                                                                                                                                                                                                                                                                                                                                                                                                                                                                                                                                                                                                                                                                                                                                                                                                                                                                                                                                                                                                                                                                                                                                                                                                                                                                                                                                                                                            |         |         |         |         |         |         |         |         |          |          |          |          |          |          |          |          |          |          |          |          |          |          |          |          |          |          |          |          |          |          |          |          |          |          |          |          |          |          |          |          |          |          |          |          |          |          |          |          |          |          |          |          |          |          |          |           |           |           |           |           |           |           |           |           |           |           |           |           |           |           |           |           |           |           |           |           |           |           |           |           |           |           |           |           |           |           |           |           |           |           |           |           |           |           |           |           |           |           |           |           |           |           |           |           |           |
| C                | 3.67168                                                                                                                                                                                                                                                                                                                                                                                                                                                                                                                                                                                                                                                                                                                                                                                                                                                                                                                                                                                                                                                                                                                                                                                                                                                                                                                                                                                                                                                                                                                                                                                                                                                                                                                                                                                                                                                                                                                                                                                                                                                                                                                                                                                                                                                                                                                                                                                                                                                                                                                                                                                   | 1.12460            | 1.03923  |   |   |   |          |          |          |   |          |          |         |    |          |          |          |    |          |          |         |    |         |          |          |   |          |          |         |   |          |          |         |   |          |          |          |   |          |          |          |    |         |         |          |    |         |          |         |   |         |         |          |   |         |         |         |   |         |         |         |   |         |          |         |   |         |         |         |   |         |         |         |   |          |         |          |   |         |         |         |   |          |         |         |   |          |         |          |   |          |         |          |   |          |         |          |   |          |         |         |   |          |         |         |   |          |         |         |   |          |         |          |   |          |         |         |   |          |         |          |   |          |         |          |   |          |         |          |   |          |         |         |   |         |         |          |                                                                                                                                                                                                                                                                                                                                                                                                                                                                                                                                                                                                                                                                                                                                                                                                                                                                                                                                                                                                                                                                                                                                                                                                                                                                                                                                                                                                                                                                                                                                                                                                                                                                                                                                                                                                                                                                                                                                                                                                                                                                                                                                                                                                                                                                                                                                                                            |         |         |         |         |         |         |         |         |          |          |          |          |          |          |          |          |          |          |          |          |          |          |          |          |          |          |          |          |          |          |          |          |          |          |          |          |          |          |          |          |          |          |          |          |          |          |          |          |          |          |          |          |          |          |          |           |           |           |           |           |           |           |           |           |           |           |           |           |           |           |           |           |           |           |           |           |           |           |           |           |           |           |           |           |           |           |           |           |           |           |           |           |           |           |           |           |           |           |           |           |           |           |           |           |           |
| H                | 4.80777                                                                                                                                                                                                                                                                                                                                                                                                                                                                                                                                                                                                                                                                                                                                                                                                                                                                                                                                                                                                                                                                                                                                                                                                                                                                                                                                                                                                                                                                                                                                                                                                                                                                                                                                                                                                                                                                                                                                                                                                                                                                                                                                                                                                                                                                                                                                                                                                                                                                                                                                                                                   | -0.66121           | 0.87847  |   |   |   |          |          |          |   |          |          |         |    |          |          |          |    |          |          |         |    |         |          |          |   |          |          |         |   |          |          |         |   |          |          |          |   |          |          |          |    |         |         |          |    |         |          |         |   |         |         |          |   |         |         |         |   |         |         |         |   |         |          |         |   |         |         |         |   |         |         |         |   |          |         |          |   |         |         |         |   |          |         |         |   |          |         |          |   |          |         |          |   |          |         |          |   |          |         |         |   |          |         |         |   |          |         |         |   |          |         |          |   |          |         |         |   |          |         |          |   |          |         |          |   |          |         |          |   |          |         |         |   |         |         |          |                                                                                                                                                                                                                                                                                                                                                                                                                                                                                                                                                                                                                                                                                                                                                                                                                                                                                                                                                                                                                                                                                                                                                                                                                                                                                                                                                                                                                                                                                                                                                                                                                                                                                                                                                                                                                                                                                                                                                                                                                                                                                                                                                                                                                                                                                                                                                                            |         |         |         |         |         |         |         |         |          |          |          |          |          |          |          |          |          |          |          |          |          |          |          |          |          |          |          |          |          |          |          |          |          |          |          |          |          |          |          |          |          |          |          |          |          |          |          |          |          |          |          |          |          |          |          |           |           |           |           |           |           |           |           |           |           |           |           |           |           |           |           |           |           |           |           |           |           |           |           |           |           |           |           |           |           |           |           |           |           |           |           |           |           |           |           |           |           |           |           |           |           |           |           |           |           |
| H                | 3.29890                                                                                                                                                                                                                                                                                                                                                                                                                                                                                                                                                                                                                                                                                                                                                                                                                                                                                                                                                                                                                                                                                                                                                                                                                                                                                                                                                                                                                                                                                                                                                                                                                                                                                                                                                                                                                                                                                                                                                                                                                                                                                                                                                                                                                                                                                                                                                                                                                                                                                                                                                                                   | 0.89309            | 2.03170  |   |   |   |          |          |          |   |          |          |         |    |          |          |          |    |          |          |         |    |         |          |          |   |          |          |         |   |          |          |         |   |          |          |          |   |          |          |          |    |         |         |          |    |         |          |         |   |         |         |          |   |         |         |         |   |         |         |         |   |         |          |         |   |         |         |         |   |         |         |         |   |          |         |          |   |         |         |         |   |          |         |         |   |          |         |          |   |          |         |          |   |          |         |          |   |          |         |         |   |          |         |         |   |          |         |         |   |          |         |          |   |          |         |         |   |          |         |          |   |          |         |          |   |          |         |          |   |          |         |         |   |         |         |          |                                                                                                                                                                                                                                                                                                                                                                                                                                                                                                                                                                                                                                                                                                                                                                                                                                                                                                                                                                                                                                                                                                                                                                                                                                                                                                                                                                                                                                                                                                                                                                                                                                                                                                                                                                                                                                                                                                                                                                                                                                                                                                                                                                                                                                                                                                                                                                            |         |         |         |         |         |         |         |         |          |          |          |          |          |          |          |          |          |          |          |          |          |          |          |          |          |          |          |          |          |          |          |          |          |          |          |          |          |          |          |          |          |          |          |          |          |          |          |          |          |          |          |          |          |          |          |           |           |           |           |           |           |           |           |           |           |           |           |           |           |           |           |           |           |           |           |           |           |           |           |           |           |           |           |           |           |           |           |           |           |           |           |           |           |           |           |           |           |           |           |           |           |           |           |           |           |
| H                | 3.40482                                                                                                                                                                                                                                                                                                                                                                                                                                                                                                                                                                                                                                                                                                                                                                                                                                                                                                                                                                                                                                                                                                                                                                                                                                                                                                                                                                                                                                                                                                                                                                                                                                                                                                                                                                                                                                                                                                                                                                                                                                                                                                                                                                                                                                                                                                                                                                                                                                                                                                                                                                                   | 2.07826            | 0.59485  |   |   |   |          |          |          |   |          |          |         |    |          |          |          |    |          |          |         |    |         |          |          |   |          |          |         |   |          |          |         |   |          |          |          |   |          |          |          |    |         |         |          |    |         |          |         |   |         |         |          |   |         |         |         |   |         |         |         |   |         |          |         |   |         |         |         |   |         |         |         |   |          |         |          |   |         |         |         |   |          |         |         |   |          |         |          |   |          |         |          |   |          |         |          |   |          |         |         |   |          |         |         |   |          |         |         |   |          |         |          |   |          |         |         |   |          |         |          |   |          |         |          |   |          |         |          |   |          |         |         |   |         |         |          |                                                                                                                                                                                                                                                                                                                                                                                                                                                                                                                                                                                                                                                                                                                                                                                                                                                                                                                                                                                                                                                                                                                                                                                                                                                                                                                                                                                                                                                                                                                                                                                                                                                                                                                                                                                                                                                                                                                                                                                                                                                                                                                                                                                                                                                                                                                                                                            |         |         |         |         |         |         |         |         |          |          |          |          |          |          |          |          |          |          |          |          |          |          |          |          |          |          |          |          |          |          |          |          |          |          |          |          |          |          |          |          |          |          |          |          |          |          |          |          |          |          |          |          |          |          |          |           |           |           |           |           |           |           |           |           |           |           |           |           |           |           |           |           |           |           |           |           |           |           |           |           |           |           |           |           |           |           |           |           |           |           |           |           |           |           |           |           |           |           |           |           |           |           |           |           |           |
| C                | -0.28746                                                                                                                                                                                                                                                                                                                                                                                                                                                                                                                                                                                                                                                                                                                                                                                                                                                                                                                                                                                                                                                                                                                                                                                                                                                                                                                                                                                                                                                                                                                                                                                                                                                                                                                                                                                                                                                                                                                                                                                                                                                                                                                                                                                                                                                                                                                                                                                                                                                                                                                                                                                  | 2.84681            | -0.79161 |   |   |   |          |          |          |   |          |          |         |    |          |          |          |    |          |          |         |    |         |          |          |   |          |          |         |   |          |          |         |   |          |          |          |   |          |          |          |    |         |         |          |    |         |          |         |   |         |         |          |   |         |         |         |   |         |         |         |   |         |          |         |   |         |         |         |   |         |         |         |   |          |         |          |   |         |         |         |   |          |         |         |   |          |         |          |   |          |         |          |   |          |         |          |   |          |         |         |   |          |         |         |   |          |         |         |   |          |         |          |   |          |         |         |   |          |         |          |   |          |         |          |   |          |         |          |   |          |         |         |   |         |         |          |                                                                                                                                                                                                                                                                                                                                                                                                                                                                                                                                                                                                                                                                                                                                                                                                                                                                                                                                                                                                                                                                                                                                                                                                                                                                                                                                                                                                                                                                                                                                                                                                                                                                                                                                                                                                                                                                                                                                                                                                                                                                                                                                                                                                                                                                                                                                                                            |         |         |         |         |         |         |         |         |          |          |          |          |          |          |          |          |          |          |          |          |          |          |          |          |          |          |          |          |          |          |          |          |          |          |          |          |          |          |          |          |          |          |          |          |          |          |          |          |          |          |          |          |          |          |          |           |           |           |           |           |           |           |           |           |           |           |           |           |           |           |           |           |           |           |           |           |           |           |           |           |           |           |           |           |           |           |           |           |           |           |           |           |           |           |           |           |           |           |           |           |           |           |           |           |           |
| O                | 0.41463                                                                                                                                                                                                                                                                                                                                                                                                                                                                                                                                                                                                                                                                                                                                                                                                                                                                                                                                                                                                                                                                                                                                                                                                                                                                                                                                                                                                                                                                                                                                                                                                                                                                                                                                                                                                                                                                                                                                                                                                                                                                                                                                                                                                                                                                                                                                                                                                                                                                                                                                                                                   | 1.38185            | 1.10270  |   |   |   |          |          |          |   |          |          |         |    |          |          |          |    |          |          |         |    |         |          |          |   |          |          |         |   |          |          |         |   |          |          |          |   |          |          |          |    |         |         |          |    |         |          |         |   |         |         |          |   |         |         |         |   |         |         |         |   |         |          |         |   |         |         |         |   |         |         |         |   |          |         |          |   |         |         |         |   |          |         |         |   |          |         |          |   |          |         |          |   |          |         |          |   |          |         |         |   |          |         |         |   |          |         |         |   |          |         |          |   |          |         |         |   |          |         |          |   |          |         |          |   |          |         |          |   |          |         |         |   |         |         |          |                                                                                                                                                                                                                                                                                                                                                                                                                                                                                                                                                                                                                                                                                                                                                                                                                                                                                                                                                                                                                                                                                                                                                                                                                                                                                                                                                                                                                                                                                                                                                                                                                                                                                                                                                                                                                                                                                                                                                                                                                                                                                                                                                                                                                                                                                                                                                                            |         |         |         |         |         |         |         |         |          |          |          |          |          |          |          |          |          |          |          |          |          |          |          |          |          |          |          |          |          |          |          |          |          |          |          |          |          |          |          |          |          |          |          |          |          |          |          |          |          |          |          |          |          |          |          |           |           |           |           |           |           |           |           |           |           |           |           |           |           |           |           |           |           |           |           |           |           |           |           |           |           |           |           |           |           |           |           |           |           |           |           |           |           |           |           |           |           |           |           |           |           |           |           |           |           |
| C                | -0.59648                                                                                                                                                                                                                                                                                                                                                                                                                                                                                                                                                                                                                                                                                                                                                                                                                                                                                                                                                                                                                                                                                                                                                                                                                                                                                                                                                                                                                                                                                                                                                                                                                                                                                                                                                                                                                                                                                                                                                                                                                                                                                                                                                                                                                                                                                                                                                                                                                                                                                                                                                                                  | 1.98166            | 0.34969  |   |   |   |          |          |          |   |          |          |         |    |          |          |          |    |          |          |         |    |         |          |          |   |          |          |         |   |          |          |         |   |          |          |          |   |          |          |          |    |         |         |          |    |         |          |         |   |         |         |          |   |         |         |         |   |         |         |         |   |         |          |         |   |         |         |         |   |         |         |         |   |          |         |          |   |         |         |         |   |          |         |         |   |          |         |          |   |          |         |          |   |          |         |          |   |          |         |         |   |          |         |         |   |          |         |         |   |          |         |          |   |          |         |         |   |          |         |          |   |          |         |          |   |          |         |          |   |          |         |         |   |         |         |          |                                                                                                                                                                                                                                                                                                                                                                                                                                                                                                                                                                                                                                                                                                                                                                                                                                                                                                                                                                                                                                                                                                                                                                                                                                                                                                                                                                                                                                                                                                                                                                                                                                                                                                                                                                                                                                                                                                                                                                                                                                                                                                                                                                                                                                                                                                                                                                            |         |         |         |         |         |         |         |         |          |          |          |          |          |          |          |          |          |          |          |          |          |          |          |          |          |          |          |          |          |          |          |          |          |          |          |          |          |          |          |          |          |          |          |          |          |          |          |          |          |          |          |          |          |          |          |           |           |           |           |           |           |           |           |           |           |           |           |           |           |           |           |           |           |           |           |           |           |           |           |           |           |           |           |           |           |           |           |           |           |           |           |           |           |           |           |           |           |           |           |           |           |           |           |           |           |
| C                | -0.88106                                                                                                                                                                                                                                                                                                                                                                                                                                                                                                                                                                                                                                                                                                                                                                                                                                                                                                                                                                                                                                                                                                                                                                                                                                                                                                                                                                                                                                                                                                                                                                                                                                                                                                                                                                                                                                                                                                                                                                                                                                                                                                                                                                                                                                                                                                                                                                                                                                                                                                                                                                                  | 1.43732            | -1.09334 |   |   |   |          |          |          |   |          |          |         |    |          |          |          |    |          |          |         |    |         |          |          |   |          |          |         |   |          |          |         |   |          |          |          |   |          |          |          |    |         |         |          |    |         |          |         |   |         |         |          |   |         |         |         |   |         |         |         |   |         |          |         |   |         |         |         |   |         |         |         |   |          |         |          |   |         |         |         |   |          |         |         |   |          |         |          |   |          |         |          |   |          |         |          |   |          |         |         |   |          |         |         |   |          |         |         |   |          |         |          |   |          |         |         |   |          |         |          |   |          |         |          |   |          |         |          |   |          |         |         |   |         |         |          |                                                                                                                                                                                                                                                                                                                                                                                                                                                                                                                                                                                                                                                                                                                                                                                                                                                                                                                                                                                                                                                                                                                                                                                                                                                                                                                                                                                                                                                                                                                                                                                                                                                                                                                                                                                                                                                                                                                                                                                                                                                                                                                                                                                                                                                                                                                                                                            |         |         |         |         |         |         |         |         |          |          |          |          |          |          |          |          |          |          |          |          |          |          |          |          |          |          |          |          |          |          |          |          |          |          |          |          |          |          |          |          |          |          |          |          |          |          |          |          |          |          |          |          |          |          |          |           |           |           |           |           |           |           |           |           |           |           |           |           |           |           |           |           |           |           |           |           |           |           |           |           |           |           |           |           |           |           |           |           |           |           |           |           |           |           |           |           |           |           |           |           |           |           |           |           |           |
| H                | -1.88628                                                                                                                                                                                                                                                                                                                                                                                                                                                                                                                                                                                                                                                                                                                                                                                                                                                                                                                                                                                                                                                                                                                                                                                                                                                                                                                                                                                                                                                                                                                                                                                                                                                                                                                                                                                                                                                                                                                                                                                                                                                                                                                                                                                                                                                                                                                                                                                                                                                                                                                                                                                  | 1.44491            | -1.50639 |   |   |   |          |          |          |   |          |          |         |    |          |          |          |    |          |          |         |    |         |          |          |   |          |          |         |   |          |          |         |   |          |          |          |   |          |          |          |    |         |         |          |    |         |          |         |   |         |         |          |   |         |         |         |   |         |         |         |   |         |          |         |   |         |         |         |   |         |         |         |   |          |         |          |   |         |         |         |   |          |         |         |   |          |         |          |   |          |         |          |   |          |         |          |   |          |         |         |   |          |         |         |   |          |         |         |   |          |         |          |   |          |         |         |   |          |         |          |   |          |         |          |   |          |         |          |   |          |         |         |   |         |         |          |                                                                                                                                                                                                                                                                                                                                                                                                                                                                                                                                                                                                                                                                                                                                                                                                                                                                                                                                                                                                                                                                                                                                                                                                                                                                                                                                                                                                                                                                                                                                                                                                                                                                                                                                                                                                                                                                                                                                                                                                                                                                                                                                                                                                                                                                                                                                                                            |         |         |         |         |         |         |         |         |          |          |          |          |          |          |          |          |          |          |          |          |          |          |          |          |          |          |          |          |          |          |          |          |          |          |          |          |          |          |          |          |          |          |          |          |          |          |          |          |          |          |          |          |          |          |          |           |           |           |           |           |           |           |           |           |           |           |           |           |           |           |           |           |           |           |           |           |           |           |           |           |           |           |           |           |           |           |           |           |           |           |           |           |           |           |           |           |           |           |           |           |           |           |           |           |           |
| H                | -0.10397                                                                                                                                                                                                                                                                                                                                                                                                                                                                                                                                                                                                                                                                                                                                                                                                                                                                                                                                                                                                                                                                                                                                                                                                                                                                                                                                                                                                                                                                                                                                                                                                                                                                                                                                                                                                                                                                                                                                                                                                                                                                                                                                                                                                                                                                                                                                                                                                                                                                                                                                                                                  | 0.92453            | -1.65885 |   |   |   |          |          |          |   |          |          |         |    |          |          |          |    |          |          |         |    |         |          |          |   |          |          |         |   |          |          |         |   |          |          |          |   |          |          |          |    |         |         |          |    |         |          |         |   |         |         |          |   |         |         |         |   |         |         |         |   |         |          |         |   |         |         |         |   |         |         |         |   |          |         |          |   |         |         |         |   |          |         |         |   |          |         |          |   |          |         |          |   |          |         |          |   |          |         |         |   |          |         |         |   |          |         |         |   |          |         |          |   |          |         |         |   |          |         |          |   |          |         |          |   |          |         |          |   |          |         |         |   |         |         |          |                                                                                                                                                                                                                                                                                                                                                                                                                                                                                                                                                                                                                                                                                                                                                                                                                                                                                                                                                                                                                                                                                                                                                                                                                                                                                                                                                                                                                                                                                                                                                                                                                                                                                                                                                                                                                                                                                                                                                                                                                                                                                                                                                                                                                                                                                                                                                                            |         |         |         |         |         |         |         |         |          |          |          |          |          |          |          |          |          |          |          |          |          |          |          |          |          |          |          |          |          |          |          |          |          |          |          |          |          |          |          |          |          |          |          |          |          |          |          |          |          |          |          |          |          |          |          |           |           |           |           |           |           |           |           |           |           |           |           |           |           |           |           |           |           |           |           |           |           |           |           |           |           |           |           |           |           |           |           |           |           |           |           |           |           |           |           |           |           |           |           |           |           |           |           |           |           |
| C                | -1.78726                                                                                                                                                                                                                                                                                                                                                                                                                                                                                                                                                                                                                                                                                                                                                                                                                                                                                                                                                                                                                                                                                                                                                                                                                                                                                                                                                                                                                                                                                                                                                                                                                                                                                                                                                                                                                                                                                                                                                                                                                                                                                                                                                                                                                                                                                                                                                                                                                                                                                                                                                                                  | 2.59862            | 1.07629  |   |   |   |          |          |          |   |          |          |         |    |          |          |          |    |          |          |         |    |         |          |          |   |          |          |         |   |          |          |         |   |          |          |          |   |          |          |          |    |         |         |          |    |         |          |         |   |         |         |          |   |         |         |         |   |         |         |         |   |         |          |         |   |         |         |         |   |         |         |         |   |          |         |          |   |         |         |         |   |          |         |         |   |          |         |          |   |          |         |          |   |          |         |          |   |          |         |         |   |          |         |         |   |          |         |         |   |          |         |          |   |          |         |         |   |          |         |          |   |          |         |          |   |          |         |          |   |          |         |         |   |         |         |          |                                                                                                                                                                                                                                                                                                                                                                                                                                                                                                                                                                                                                                                                                                                                                                                                                                                                                                                                                                                                                                                                                                                                                                                                                                                                                                                                                                                                                                                                                                                                                                                                                                                                                                                                                                                                                                                                                                                                                                                                                                                                                                                                                                                                                                                                                                                                                                            |         |         |         |         |         |         |         |         |          |          |          |          |          |          |          |          |          |          |          |          |          |          |          |          |          |          |          |          |          |          |          |          |          |          |          |          |          |          |          |          |          |          |          |          |          |          |          |          |          |          |          |          |          |          |          |           |           |           |           |           |           |           |           |           |           |           |           |           |           |           |           |           |           |           |           |           |           |           |           |           |           |           |           |           |           |           |           |           |           |           |           |           |           |           |           |           |           |           |           |           |           |           |           |           |           |
| H                | -2.46693                                                                                                                                                                                                                                                                                                                                                                                                                                                                                                                                                                                                                                                                                                                                                                                                                                                                                                                                                                                                                                                                                                                                                                                                                                                                                                                                                                                                                                                                                                                                                                                                                                                                                                                                                                                                                                                                                                                                                                                                                                                                                                                                                                                                                                                                                                                                                                                                                                                                                                                                                                                  | 1.87065            | 1.52362  |   |   |   |          |          |          |   |          |          |         |    |          |          |          |    |          |          |         |    |         |          |          |   |          |          |         |   |          |          |         |   |          |          |          |   |          |          |          |    |         |         |          |    |         |          |         |   |         |         |          |   |         |         |         |   |         |         |         |   |         |          |         |   |         |         |         |   |         |         |         |   |          |         |          |   |         |         |         |   |          |         |         |   |          |         |          |   |          |         |          |   |          |         |          |   |          |         |         |   |          |         |         |   |          |         |         |   |          |         |          |   |          |         |         |   |          |         |          |   |          |         |          |   |          |         |          |   |          |         |         |   |         |         |          |                                                                                                                                                                                                                                                                                                                                                                                                                                                                                                                                                                                                                                                                                                                                                                                                                                                                                                                                                                                                                                                                                                                                                                                                                                                                                                                                                                                                                                                                                                                                                                                                                                                                                                                                                                                                                                                                                                                                                                                                                                                                                                                                                                                                                                                                                                                                                                            |         |         |         |         |         |         |         |         |          |          |          |          |          |          |          |          |          |          |          |          |          |          |          |          |          |          |          |          |          |          |          |          |          |          |          |          |          |          |          |          |          |          |          |          |          |          |          |          |          |          |          |          |          |          |          |           |           |           |           |           |           |           |           |           |           |           |           |           |           |           |           |           |           |           |           |           |           |           |           |           |           |           |           |           |           |           |           |           |           |           |           |           |           |           |           |           |           |           |           |           |           |           |           |           |           |
| C                | -2.45531                                                                                                                                                                                                                                                                                                                                                                                                                                                                                                                                                                                                                                                                                                                                                                                                                                                                                                                                                                                                                                                                                                                                                                                                                                                                                                                                                                                                                                                                                                                                                                                                                                                                                                                                                                                                                                                                                                                                                                                                                                                                                                                                                                                                                                                                                                                                                                                                                                                                                                                                                                                  | 3.49604            | 0.02799  |   |   |   |          |          |          |   |          |          |         |    |          |          |          |    |          |          |         |    |         |          |          |   |          |          |         |   |          |          |         |   |          |          |          |   |          |          |          |    |         |         |          |    |         |          |         |   |         |         |          |   |         |         |         |   |         |         |         |   |         |          |         |   |         |         |         |   |         |         |         |   |          |         |          |   |         |         |         |   |          |         |         |   |          |         |          |   |          |         |          |   |          |         |          |   |          |         |         |   |          |         |         |   |          |         |         |   |          |         |          |   |          |         |         |   |          |         |          |   |          |         |          |   |          |         |          |   |          |         |         |   |         |         |          |                                                                                                                                                                                                                                                                                                                                                                                                                                                                                                                                                                                                                                                                                                                                                                                                                                                                                                                                                                                                                                                                                                                                                                                                                                                                                                                                                                                                                                                                                                                                                                                                                                                                                                                                                                                                                                                                                                                                                                                                                                                                                                                                                                                                                                                                                                                                                                            |         |         |         |         |         |         |         |         |          |          |          |          |          |          |          |          |          |          |          |          |          |          |          |          |          |          |          |          |          |          |          |          |          |          |          |          |          |          |          |          |          |          |          |          |          |          |          |          |          |          |          |          |          |          |          |           |           |           |           |           |           |           |           |           |           |           |           |           |           |           |           |           |           |           |           |           |           |           |           |           |           |           |           |           |           |           |           |           |           |           |           |           |           |           |           |           |           |           |           |           |           |           |           |           |           |
| H                | -3.16809                                                                                                                                                                                                                                                                                                                                                                                                                                                                                                                                                                                                                                                                                                                                                                                                                                                                                                                                                                                                                                                                                                                                                                                                                                                                                                                                                                                                                                                                                                                                                                                                                                                                                                                                                                                                                                                                                                                                                                                                                                                                                                                                                                                                                                                                                                                                                                                                                                                                                                                                                                                  | 2.91365            | -0.56328 |   |   |   |          |          |          |   |          |          |         |    |          |          |          |    |          |          |         |    |         |          |          |   |          |          |         |   |          |          |         |   |          |          |          |   |          |          |          |    |         |         |          |    |         |          |         |   |         |         |          |   |         |         |         |   |         |         |         |   |         |          |         |   |         |         |         |   |         |         |         |   |          |         |          |   |         |         |         |   |          |         |         |   |          |         |          |   |          |         |          |   |          |         |          |   |          |         |         |   |          |         |         |   |          |         |         |   |          |         |          |   |          |         |         |   |          |         |          |   |          |         |          |   |          |         |          |   |          |         |         |   |         |         |          |                                                                                                                                                                                                                                                                                                                                                                                                                                                                                                                                                                                                                                                                                                                                                                                                                                                                                                                                                                                                                                                                                                                                                                                                                                                                                                                                                                                                                                                                                                                                                                                                                                                                                                                                                                                                                                                                                                                                                                                                                                                                                                                                                                                                                                                                                                                                                                            |         |         |         |         |         |         |         |         |          |          |          |          |          |          |          |          |          |          |          |          |          |          |          |          |          |          |          |          |          |          |          |          |          |          |          |          |          |          |          |          |          |          |          |          |          |          |          |          |          |          |          |          |          |          |          |           |           |           |           |           |           |           |           |           |           |           |           |           |           |           |           |           |           |           |           |           |           |           |           |           |           |           |           |           |           |           |           |           |           |           |           |           |           |           |           |           |           |           |           |           |           |           |           |           |           |
| H                | -3.01085                                                                                                                                                                                                                                                                                                                                                                                                                                                                                                                                                                                                                                                                                                                                                                                                                                                                                                                                                                                                                                                                                                                                                                                                                                                                                                                                                                                                                                                                                                                                                                                                                                                                                                                                                                                                                                                                                                                                                                                                                                                                                                                                                                                                                                                                                                                                                                                                                                                                                                                                                                                  | 4.31663            | 0.48525  |   |   |   |          |          |          |   |          |          |         |    |          |          |          |    |          |          |         |    |         |          |          |   |          |          |         |   |          |          |         |   |          |          |          |   |          |          |          |    |         |         |          |    |         |          |         |   |         |         |          |   |         |         |         |   |         |         |         |   |         |          |         |   |         |         |         |   |         |         |         |   |          |         |          |   |         |         |         |   |          |         |         |   |          |         |          |   |          |         |          |   |          |         |          |   |          |         |         |   |          |         |         |   |          |         |         |   |          |         |          |   |          |         |         |   |          |         |          |   |          |         |          |   |          |         |          |   |          |         |         |   |         |         |          |                                                                                                                                                                                                                                                                                                                                                                                                                                                                                                                                                                                                                                                                                                                                                                                                                                                                                                                                                                                                                                                                                                                                                                                                                                                                                                                                                                                                                                                                                                                                                                                                                                                                                                                                                                                                                                                                                                                                                                                                                                                                                                                                                                                                                                                                                                                                                                            |         |         |         |         |         |         |         |         |          |          |          |          |          |          |          |          |          |          |          |          |          |          |          |          |          |          |          |          |          |          |          |          |          |          |          |          |          |          |          |          |          |          |          |          |          |          |          |          |          |          |          |          |          |          |          |           |           |           |           |           |           |           |           |           |           |           |           |           |           |           |           |           |           |           |           |           |           |           |           |           |           |           |           |           |           |           |           |           |           |           |           |           |           |           |           |           |           |           |           |           |           |           |           |           |           |
| C                | -1.28519                                                                                                                                                                                                                                                                                                                                                                                                                                                                                                                                                                                                                                                                                                                                                                                                                                                                                                                                                                                                                                                                                                                                                                                                                                                                                                                                                                                                                                                                                                                                                                                                                                                                                                                                                                                                                                                                                                                                                                                                                                                                                                                                                                                                                                                                                                                                                                                                                                                                                                                                                                                  | 3.98629            | -0.84577 |   |   |   |          |          |          |   |          |          |         |    |          |          |          |    |          |          |         |    |         |          |          |   |          |          |         |   |          |          |         |   |          |          |          |   |          |          |          |    |         |         |          |    |         |          |         |   |         |         |          |   |         |         |         |   |         |         |         |   |         |          |         |   |         |         |         |   |         |         |         |   |          |         |          |   |         |         |         |   |          |         |         |   |          |         |          |   |          |         |          |   |          |         |          |   |          |         |         |   |          |         |         |   |          |         |         |   |          |         |          |   |          |         |         |   |          |         |          |   |          |         |          |   |          |         |          |   |          |         |         |   |         |         |          |                                                                                                                                                                                                                                                                                                                                                                                                                                                                                                                                                                                                                                                                                                                                                                                                                                                                                                                                                                                                                                                                                                                                                                                                                                                                                                                                                                                                                                                                                                                                                                                                                                                                                                                                                                                                                                                                                                                                                                                                                                                                                                                                                                                                                                                                                                                                                                            |         |         |         |         |         |         |         |         |          |          |          |          |          |          |          |          |          |          |          |          |          |          |          |          |          |          |          |          |          |          |          |          |          |          |          |          |          |          |          |          |          |          |          |          |          |          |          |          |          |          |          |          |          |          |          |           |           |           |           |           |           |           |           |           |           |           |           |           |           |           |           |           |           |           |           |           |           |           |           |           |           |           |           |           |           |           |           |           |           |           |           |           |           |           |           |           |           |           |           |           |           |           |           |           |           |
| H                | -1.58626                                                                                                                                                                                                                                                                                                                                                                                                                                                                                                                                                                                                                                                                                                                                                                                                                                                                                                                                                                                                                                                                                                                                                                                                                                                                                                                                                                                                                                                                                                                                                                                                                                                                                                                                                                                                                                                                                                                                                                                                                                                                                                                                                                                                                                                                                                                                                                                                                                                                                                                                                                                  | 4.23957            | -1.86563 |   |   |   |          |          |          |   |          |          |         |    |          |          |          |    |          |          |         |    |         |          |          |   |          |          |         |   |          |          |         |   |          |          |          |   |          |          |          |    |         |         |          |    |         |          |         |   |         |         |          |   |         |         |         |   |         |         |         |   |         |          |         |   |         |         |         |   |         |         |         |   |          |         |          |   |         |         |         |   |          |         |         |   |          |         |          |   |          |         |          |   |          |         |          |   |          |         |         |   |          |         |         |   |          |         |         |   |          |         |          |   |          |         |         |   |          |         |          |   |          |         |          |   |          |         |          |   |          |         |         |   |         |         |          |                                                                                                                                                                                                                                                                                                                                                                                                                                                                                                                                                                                                                                                                                                                                                                                                                                                                                                                                                                                                                                                                                                                                                                                                                                                                                                                                                                                                                                                                                                                                                                                                                                                                                                                                                                                                                                                                                                                                                                                                                                                                                                                                                                                                                                                                                                                                                                            |         |         |         |         |         |         |         |         |          |          |          |          |          |          |          |          |          |          |          |          |          |          |          |          |          |          |          |          |          |          |          |          |          |          |          |          |          |          |          |          |          |          |          |          |          |          |          |          |          |          |          |          |          |          |          |           |           |           |           |           |           |           |           |           |           |           |           |           |           |           |           |           |           |           |           |           |           |           |           |           |           |           |           |           |           |           |           |           |           |           |           |           |           |           |           |           |           |           |           |           |           |           |           |           |           |
| H                | -0.82036                                                                                                                                                                                                                                                                                                                                                                                                                                                                                                                                                                                                                                                                                                                                                                                                                                                                                                                                                                                                                                                                                                                                                                                                                                                                                                                                                                                                                                                                                                                                                                                                                                                                                                                                                                                                                                                                                                                                                                                                                                                                                                                                                                                                                                                                                                                                                                                                                                                                                                                                                                                  | 4.87475            | -0.40316 |   |   |   |          |          |          |   |          |          |         |    |          |          |          |    |          |          |         |    |         |          |          |   |          |          |         |   |          |          |         |   |          |          |          |   |          |          |          |    |         |         |          |    |         |          |         |   |         |         |          |   |         |         |         |   |         |         |         |   |         |          |         |   |         |         |         |   |         |         |         |   |          |         |          |   |         |         |         |   |          |         |         |   |          |         |          |   |          |         |          |   |          |         |          |   |          |         |         |   |          |         |         |   |          |         |         |   |          |         |          |   |          |         |         |   |          |         |          |   |          |         |          |   |          |         |          |   |          |         |         |   |         |         |          |                                                                                                                                                                                                                                                                                                                                                                                                                                                                                                                                                                                                                                                                                                                                                                                                                                                                                                                                                                                                                                                                                                                                                                                                                                                                                                                                                                                                                                                                                                                                                                                                                                                                                                                                                                                                                                                                                                                                                                                                                                                                                                                                                                                                                                                                                                                                                                            |         |         |         |         |         |         |         |         |          |          |          |          |          |          |          |          |          |          |          |          |          |          |          |          |          |          |          |          |          |          |          |          |          |          |          |          |          |          |          |          |          |          |          |          |          |          |          |          |          |          |          |          |          |          |          |           |           |           |           |           |           |           |           |           |           |           |           |           |           |           |           |           |           |           |           |           |           |           |           |           |           |           |           |           |           |           |           |           |           |           |           |           |           |           |           |           |           |           |           |           |           |           |           |           |           |
| H                | -1.36183                                                                                                                                                                                                                                                                                                                                                                                                                                                                                                                                                                                                                                                                                                                                                                                                                                                                                                                                                                                                                                                                                                                                                                                                                                                                                                                                                                                                                                                                                                                                                                                                                                                                                                                                                                                                                                                                                                                                                                                                                                                                                                                                                                                                                                                                                                                                                                                                                                                                                                                                                                                  | 3.21882            | 1.87400  |   |   |   |          |          |          |   |          |          |         |    |          |          |          |    |          |          |         |    |         |          |          |   |          |          |         |   |          |          |         |   |          |          |          |   |          |          |          |    |         |         |          |    |         |          |         |   |         |         |          |   |         |         |         |   |         |         |         |   |         |          |         |   |         |         |         |   |         |         |         |   |          |         |          |   |         |         |         |   |          |         |         |   |          |         |          |   |          |         |          |   |          |         |          |   |          |         |         |   |          |         |         |   |          |         |         |   |          |         |          |   |          |         |         |   |          |         |          |   |          |         |          |   |          |         |          |   |          |         |         |   |         |         |          |                                                                                                                                                                                                                                                                                                                                                                                                                                                                                                                                                                                                                                                                                                                                                                                                                                                                                                                                                                                                                                                                                                                                                                                                                                                                                                                                                                                                                                                                                                                                                                                                                                                                                                                                                                                                                                                                                                                                                                                                                                                                                                                                                                                                                                                                                                                                                                            |         |         |         |         |         |         |         |         |          |          |          |          |          |          |          |          |          |          |          |          |          |          |          |          |          |          |          |          |          |          |          |          |          |          |          |          |          |          |          |          |          |          |          |          |          |          |          |          |          |          |          |          |          |          |          |           |           |           |           |           |           |           |           |           |           |           |           |           |           |           |           |           |           |           |           |           |           |           |           |           |           |           |           |           |           |           |           |           |           |           |           |           |           |           |           |           |           |           |           |           |           |           |           |           |           |
| H                | 0.73455                                                                                                                                                                                                                                                                                                                                                                                                                                                                                                                                                                                                                                                                                                                                                                                                                                                                                                                                                                                                                                                                                                                                                                                                                                                                                                                                                                                                                                                                                                                                                                                                                                                                                                                                                                                                                                                                                                                                                                                                                                                                                                                                                                                                                                                                                                                                                                                                                                                                                                                                                                                   | 2.95587            | -1.13762 |   |   |   |          |          |          |   |          |          |         |    |          |          |          |    |          |          |         |    |         |          |          |   |          |          |         |   |          |          |         |   |          |          |          |   |          |          |          |    |         |         |          |    |         |          |         |   |         |         |          |   |         |         |         |   |         |         |         |   |         |          |         |   |         |         |         |   |         |         |         |   |          |         |          |   |         |         |         |   |          |         |         |   |          |         |          |   |          |         |          |   |          |         |          |   |          |         |         |   |          |         |         |   |          |         |         |   |          |         |          |   |          |         |         |   |          |         |          |   |          |         |          |   |          |         |          |   |          |         |         |   |         |         |          |                                                                                                                                                                                                                                                                                                                                                                                                                                                                                                                                                                                                                                                                                                                                                                                                                                                                                                                                                                                                                                                                                                                                                                                                                                                                                                                                                                                                                                                                                                                                                                                                                                                                                                                                                                                                                                                                                                                                                                                                                                                                                                                                                                                                                                                                                                                                                                            |         |         |         |         |         |         |         |         |          |          |          |          |          |          |          |          |          |          |          |          |          |          |          |          |          |          |          |          |          |          |          |          |          |          |          |          |          |          |          |          |          |          |          |          |          |          |          |          |          |          |          |          |          |          |          |           |           |           |           |           |           |           |           |           |           |           |           |           |           |           |           |           |           |           |           |           |           |           |           |           |           |           |           |           |           |           |           |           |           |           |           |           |           |           |           |           |           |           |           |           |           |           |           |           |           |
| 30.6420          | 35.4141                                                                                                                                                                                                                                                                                                                                                                                                                                                                                                                                                                                                                                                                                                                                                                                                                                                                                                                                                                                                                                                                                                                                                                                                                                                                                                                                                                                                                                                                                                                                                                                                                                                                                                                                                                                                                                                                                                                                                                                                                                                                                                                                                                                                                                                                                                                                                                                                                                                                                                                                                                                   | 60.5301            |          |   |   |   |          |          |          |   |          |          |         |    |          |          |          |    |          |          |         |    |         |          |          |   |          |          |         |   |          |          |         |   |          |          |          |   |          |          |          |    |         |         |          |    |         |          |         |   |         |         |          |   |         |         |         |   |         |         |         |   |         |          |         |   |         |         |         |   |         |         |         |   |          |         |          |   |         |         |         |   |          |         |         |   |          |         |          |   |          |         |          |   |          |         |          |   |          |         |         |   |          |         |         |   |          |         |         |   |          |         |          |   |          |         |         |   |          |         |          |   |          |         |          |   |          |         |          |   |          |         |         |   |         |         |          |                                                                                                                                                                                                                                                                                                                                                                                                                                                                                                                                                                                                                                                                                                                                                                                                                                                                                                                                                                                                                                                                                                                                                                                                                                                                                                                                                                                                                                                                                                                                                                                                                                                                                                                                                                                                                                                                                                                                                                                                                                                                                                                                                                                                                                                                                                                                                                            |         |         |         |         |         |         |         |         |          |          |          |          |          |          |          |          |          |          |          |          |          |          |          |          |          |          |          |          |          |          |          |          |          |          |          |          |          |          |          |          |          |          |          |          |          |          |          |          |          |          |          |          |          |          |          |           |           |           |           |           |           |           |           |           |           |           |           |           |           |           |           |           |           |           |           |           |           |           |           |           |           |           |           |           |           |           |           |           |           |           |           |           |           |           |           |           |           |           |           |           |           |           |           |           |           |
| 68.7886          | 79.1947                                                                                                                                                                                                                                                                                                                                                                                                                                                                                                                                                                                                                                                                                                                                                                                                                                                                                                                                                                                                                                                                                                                                                                                                                                                                                                                                                                                                                                                                                                                                                                                                                                                                                                                                                                                                                                                                                                                                                                                                                                                                                                                                                                                                                                                                                                                                                                                                                                                                                                                                                                                   | 83.2552            |          |   |   |   |          |          |          |   |          |          |         |    |          |          |          |    |          |          |         |    |         |          |          |   |          |          |         |   |          |          |         |   |          |          |          |   |          |          |          |    |         |         |          |    |         |          |         |   |         |         |          |   |         |         |         |   |         |         |         |   |         |          |         |   |         |         |         |   |         |         |         |   |          |         |          |   |         |         |         |   |          |         |         |   |          |         |          |   |          |         |          |   |          |         |          |   |          |         |         |   |          |         |         |   |          |         |         |   |          |         |          |   |          |         |         |   |          |         |          |   |          |         |          |   |          |         |          |   |          |         |         |   |         |         |          |                                                                                                                                                                                                                                                                                                                                                                                                                                                                                                                                                                                                                                                                                                                                                                                                                                                                                                                                                                                                                                                                                                                                                                                                                                                                                                                                                                                                                                                                                                                                                                                                                                                                                                                                                                                                                                                                                                                                                                                                                                                                                                                                                                                                                                                                                                                                                                            |         |         |         |         |         |         |         |         |          |          |          |          |          |          |          |          |          |          |          |          |          |          |          |          |          |          |          |          |          |          |          |          |          |          |          |          |          |          |          |          |          |          |          |          |          |          |          |          |          |          |          |          |          |          |          |           |           |           |           |           |           |           |           |           |           |           |           |           |           |           |           |           |           |           |           |           |           |           |           |           |           |           |           |           |           |           |           |           |           |           |           |           |           |           |           |           |           |           |           |           |           |           |           |           |           |
| 93.9088          | 98.4002                                                                                                                                                                                                                                                                                                                                                                                                                                                                                                                                                                                                                                                                                                                                                                                                                                                                                                                                                                                                                                                                                                                                                                                                                                                                                                                                                                                                                                                                                                                                                                                                                                                                                                                                                                                                                                                                                                                                                                                                                                                                                                                                                                                                                                                                                                                                                                                                                                                                                                                                                                                   | 104.8874           |          |   |   |   |          |          |          |   |          |          |         |    |          |          |          |    |          |          |         |    |         |          |          |   |          |          |         |   |          |          |         |   |          |          |          |   |          |          |          |    |         |         |          |    |         |          |         |   |         |         |          |   |         |         |         |   |         |         |         |   |         |          |         |   |         |         |         |   |         |         |         |   |          |         |          |   |         |         |         |   |          |         |         |   |          |         |          |   |          |         |          |   |          |         |          |   |          |         |         |   |          |         |         |   |          |         |         |   |          |         |          |   |          |         |         |   |          |         |          |   |          |         |          |   |          |         |          |   |          |         |         |   |         |         |          |                                                                                                                                                                                                                                                                                                                                                                                                                                                                                                                                                                                                                                                                                                                                                                                                                                                                                                                                                                                                                                                                                                                                                                                                                                                                                                                                                                                                                                                                                                                                                                                                                                                                                                                                                                                                                                                                                                                                                                                                                                                                                                                                                                                                                                                                                                                                                                            |         |         |         |         |         |         |         |         |          |          |          |          |          |          |          |          |          |          |          |          |          |          |          |          |          |          |          |          |          |          |          |          |          |          |          |          |          |          |          |          |          |          |          |          |          |          |          |          |          |          |          |          |          |          |          |           |           |           |           |           |           |           |           |           |           |           |           |           |           |           |           |           |           |           |           |           |           |           |           |           |           |           |           |           |           |           |           |           |           |           |           |           |           |           |           |           |           |           |           |           |           |           |           |           |           |
| 112.6498         | 120.9339                                                                                                                                                                                                                                                                                                                                                                                                                                                                                                                                                                                                                                                                                                                                                                                                                                                                                                                                                                                                                                                                                                                                                                                                                                                                                                                                                                                                                                                                                                                                                                                                                                                                                                                                                                                                                                                                                                                                                                                                                                                                                                                                                                                                                                                                                                                                                                                                                                                                                                                                                                                  | 138.9200           |          |   |   |   |          |          |          |   |          |          |         |    |          |          |          |    |          |          |         |    |         |          |          |   |          |          |         |   |          |          |         |   |          |          |          |   |          |          |          |    |         |         |          |    |         |          |         |   |         |         |          |   |         |         |         |   |         |         |         |   |         |          |         |   |         |         |         |   |         |         |         |   |          |         |          |   |         |         |         |   |          |         |         |   |          |         |          |   |          |         |          |   |          |         |          |   |          |         |         |   |          |         |         |   |          |         |         |   |          |         |          |   |          |         |         |   |          |         |          |   |          |         |          |   |          |         |          |   |          |         |         |   |         |         |          |                                                                                                                                                                                                                                                                                                                                                                                                                                                                                                                                                                                                                                                                                                                                                                                                                                                                                                                                                                                                                                                                                                                                                                                                                                                                                                                                                                                                                                                                                                                                                                                                                                                                                                                                                                                                                                                                                                                                                                                                                                                                                                                                                                                                                                                                                                                                                                            |         |         |         |         |         |         |         |         |          |          |          |          |          |          |          |          |          |          |          |          |          |          |          |          |          |          |          |          |          |          |          |          |          |          |          |          |          |          |          |          |          |          |          |          |          |          |          |          |          |          |          |          |          |          |          |           |           |           |           |           |           |           |           |           |           |           |           |           |           |           |           |           |           |           |           |           |           |           |           |           |           |           |           |           |           |           |           |           |           |           |           |           |           |           |           |           |           |           |           |           |           |           |           |           |           |
| 147.3202         | 154.7082                                                                                                                                                                                                                                                                                                                                                                                                                                                                                                                                                                                                                                                                                                                                                                                                                                                                                                                                                                                                                                                                                                                                                                                                                                                                                                                                                                                                                                                                                                                                                                                                                                                                                                                                                                                                                                                                                                                                                                                                                                                                                                                                                                                                                                                                                                                                                                                                                                                                                                                                                                                  | 156.5706           |          |   |   |   |          |          |          |   |          |          |         |    |          |          |          |    |          |          |         |    |         |          |          |   |          |          |         |   |          |          |         |   |          |          |          |   |          |          |          |    |         |         |          |    |         |          |         |   |         |         |          |   |         |         |         |   |         |         |         |   |         |          |         |   |         |         |         |   |         |         |         |   |          |         |          |   |         |         |         |   |          |         |         |   |          |         |          |   |          |         |          |   |          |         |          |   |          |         |         |   |          |         |         |   |          |         |         |   |          |         |          |   |          |         |         |   |          |         |          |   |          |         |          |   |          |         |          |   |          |         |         |   |         |         |          |                                                                                                                                                                                                                                                                                                                                                                                                                                                                                                                                                                                                                                                                                                                                                                                                                                                                                                                                                                                                                                                                                                                                                                                                                                                                                                                                                                                                                                                                                                                                                                                                                                                                                                                                                                                                                                                                                                                                                                                                                                                                                                                                                                                                                                                                                                                                                                            |         |         |         |         |         |         |         |         |          |          |          |          |          |          |          |          |          |          |          |          |          |          |          |          |          |          |          |          |          |          |          |          |          |          |          |          |          |          |          |          |          |          |          |          |          |          |          |          |          |          |          |          |          |          |          |           |           |           |           |           |           |           |           |           |           |           |           |           |           |           |           |           |           |           |           |           |           |           |           |           |           |           |           |           |           |           |           |           |           |           |           |           |           |           |           |           |           |           |           |           |           |           |           |           |           |
| 169.7077         | 180.7643                                                                                                                                                                                                                                                                                                                                                                                                                                                                                                                                                                                                                                                                                                                                                                                                                                                                                                                                                                                                                                                                                                                                                                                                                                                                                                                                                                                                                                                                                                                                                                                                                                                                                                                                                                                                                                                                                                                                                                                                                                                                                                                                                                                                                                                                                                                                                                                                                                                                                                                                                                                  | 186.6909           |          |   |   |   |          |          |          |   |          |          |         |    |          |          |          |    |          |          |         |    |         |          |          |   |          |          |         |   |          |          |         |   |          |          |          |   |          |          |          |    |         |         |          |    |         |          |         |   |         |         |          |   |         |         |         |   |         |         |         |   |         |          |         |   |         |         |         |   |         |         |         |   |          |         |          |   |         |         |         |   |          |         |         |   |          |         |          |   |          |         |          |   |          |         |          |   |          |         |         |   |          |         |         |   |          |         |         |   |          |         |          |   |          |         |         |   |          |         |          |   |          |         |          |   |          |         |          |   |          |         |         |   |         |         |          |                                                                                                                                                                                                                                                                                                                                                                                                                                                                                                                                                                                                                                                                                                                                                                                                                                                                                                                                                                                                                                                                                                                                                                                                                                                                                                                                                                                                                                                                                                                                                                                                                                                                                                                                                                                                                                                                                                                                                                                                                                                                                                                                                                                                                                                                                                                                                                            |         |         |         |         |         |         |         |         |          |          |          |          |          |          |          |          |          |          |          |          |          |          |          |          |          |          |          |          |          |          |          |          |          |          |          |          |          |          |          |          |          |          |          |          |          |          |          |          |          |          |          |          |          |          |          |           |           |           |           |           |           |           |           |           |           |           |           |           |           |           |           |           |           |           |           |           |           |           |           |           |           |           |           |           |           |           |           |           |           |           |           |           |           |           |           |           |           |           |           |           |           |           |           |           |           |
| 196.6483         | 204.1934                                                                                                                                                                                                                                                                                                                                                                                                                                                                                                                                                                                                                                                                                                                                                                                                                                                                                                                                                                                                                                                                                                                                                                                                                                                                                                                                                                                                                                                                                                                                                                                                                                                                                                                                                                                                                                                                                                                                                                                                                                                                                                                                                                                                                                                                                                                                                                                                                                                                                                                                                                                  | 209.9419           |          |   |   |   |          |          |          |   |          |          |         |    |          |          |          |    |          |          |         |    |         |          |          |   |          |          |         |   |          |          |         |   |          |          |          |   |          |          |          |    |         |         |          |    |         |          |         |   |         |         |          |   |         |         |         |   |         |         |         |   |         |          |         |   |         |         |         |   |         |         |         |   |          |         |          |   |         |         |         |   |          |         |         |   |          |         |          |   |          |         |          |   |          |         |          |   |          |         |         |   |          |         |         |   |          |         |         |   |          |         |          |   |          |         |         |   |          |         |          |   |          |         |          |   |          |         |          |   |          |         |         |   |         |         |          |                                                                                                                                                                                                                                                                                                                                                                                                                                                                                                                                                                                                                                                                                                                                                                                                                                                                                                                                                                                                                                                                                                                                                                                                                                                                                                                                                                                                                                                                                                                                                                                                                                                                                                                                                                                                                                                                                                                                                                                                                                                                                                                                                                                                                                                                                                                                                                            |         |         |         |         |         |         |         |         |          |          |          |          |          |          |          |          |          |          |          |          |          |          |          |          |          |          |          |          |          |          |          |          |          |          |          |          |          |          |          |          |          |          |          |          |          |          |          |          |          |          |          |          |          |          |          |           |           |           |           |           |           |           |           |           |           |           |           |           |           |           |           |           |           |           |           |           |           |           |           |           |           |           |           |           |           |           |           |           |           |           |           |           |           |           |           |           |           |           |           |           |           |           |           |           |           |
| 241.5591         | 256.0979                                                                                                                                                                                                                                                                                                                                                                                                                                                                                                                                                                                                                                                                                                                                                                                                                                                                                                                                                                                                                                                                                                                                                                                                                                                                                                                                                                                                                                                                                                                                                                                                                                                                                                                                                                                                                                                                                                                                                                                                                                                                                                                                                                                                                                                                                                                                                                                                                                                                                                                                                                                  | 259.0343           |          |   |   |   |          |          |          |   |          |          |         |    |          |          |          |    |          |          |         |    |         |          |          |   |          |          |         |   |          |          |         |   |          |          |          |   |          |          |          |    |         |         |          |    |         |          |         |   |         |         |          |   |         |         |         |   |         |         |         |   |         |          |         |   |         |         |         |   |         |         |         |   |          |         |          |   |         |         |         |   |          |         |         |   |          |         |          |   |          |         |          |   |          |         |          |   |          |         |         |   |          |         |         |   |          |         |         |   |          |         |          |   |          |         |         |   |          |         |          |   |          |         |          |   |          |         |          |   |          |         |         |   |         |         |          |                                                                                                                                                                                                                                                                                                                                                                                                                                                                                                                                                                                                                                                                                                                                                                                                                                                                                                                                                                                                                                                                                                                                                                                                                                                                                                                                                                                                                                                                                                                                                                                                                                                                                                                                                                                                                                                                                                                                                                                                                                                                                                                                                                                                                                                                                                                                                                            |         |         |         |         |         |         |         |         |          |          |          |          |          |          |          |          |          |          |          |          |          |          |          |          |          |          |          |          |          |          |          |          |          |          |          |          |          |          |          |          |          |          |          |          |          |          |          |          |          |          |          |          |          |          |          |           |           |           |           |           |           |           |           |           |           |           |           |           |           |           |           |           |           |           |           |           |           |           |           |           |           |           |           |           |           |           |           |           |           |           |           |           |           |           |           |           |           |           |           |           |           |           |           |           |           |
| 283.3132         | 294.7099                                                                                                                                                                                                                                                                                                                                                                                                                                                                                                                                                                                                                                                                                                                                                                                                                                                                                                                                                                                                                                                                                                                                                                                                                                                                                                                                                                                                                                                                                                                                                                                                                                                                                                                                                                                                                                                                                                                                                                                                                                                                                                                                                                                                                                                                                                                                                                                                                                                                                                                                                                                  | 299.3715           |          |   |   |   |          |          |          |   |          |          |         |    |          |          |          |    |          |          |         |    |         |          |          |   |          |          |         |   |          |          |         |   |          |          |          |   |          |          |          |    |         |         |          |    |         |          |         |   |         |         |          |   |         |         |         |   |         |         |         |   |         |          |         |   |         |         |         |   |         |         |         |   |          |         |          |   |         |         |         |   |          |         |         |   |          |         |          |   |          |         |          |   |          |         |          |   |          |         |         |   |          |         |         |   |          |         |         |   |          |         |          |   |          |         |         |   |          |         |          |   |          |         |          |   |          |         |          |   |          |         |         |   |         |         |          |                                                                                                                                                                                                                                                                                                                                                                                                                                                                                                                                                                                                                                                                                                                                                                                                                                                                                                                                                                                                                                                                                                                                                                                                                                                                                                                                                                                                                                                                                                                                                                                                                                                                                                                                                                                                                                                                                                                                                                                                                                                                                                                                                                                                                                                                                                                                                                            |         |         |         |         |         |         |         |         |          |          |          |          |          |          |          |          |          |          |          |          |          |          |          |          |          |          |          |          |          |          |          |          |          |          |          |          |          |          |          |          |          |          |          |          |          |          |          |          |          |          |          |          |          |          |          |           |           |           |           |           |           |           |           |           |           |           |           |           |           |           |           |           |           |           |           |           |           |           |           |           |           |           |           |           |           |           |           |           |           |           |           |           |           |           |           |           |           |           |           |           |           |           |           |           |           |
| 315.2638         | 322.5303                                                                                                                                                                                                                                                                                                                                                                                                                                                                                                                                                                                                                                                                                                                                                                                                                                                                                                                                                                                                                                                                                                                                                                                                                                                                                                                                                                                                                                                                                                                                                                                                                                                                                                                                                                                                                                                                                                                                                                                                                                                                                                                                                                                                                                                                                                                                                                                                                                                                                                                                                                                  | 342.2406           |          |   |   |   |          |          |          |   |          |          |         |    |          |          |          |    |          |          |         |    |         |          |          |   |          |          |         |   |          |          |         |   |          |          |          |   |          |          |          |    |         |         |          |    |         |          |         |   |         |         |          |   |         |         |         |   |         |         |         |   |         |          |         |   |         |         |         |   |         |         |         |   |          |         |          |   |         |         |         |   |          |         |         |   |          |         |          |   |          |         |          |   |          |         |          |   |          |         |         |   |          |         |         |   |          |         |         |   |          |         |          |   |          |         |         |   |          |         |          |   |          |         |          |   |          |         |          |   |          |         |         |   |         |         |          |                                                                                                                                                                                                                                                                                                                                                                                                                                                                                                                                                                                                                                                                                                                                                                                                                                                                                                                                                                                                                                                                                                                                                                                                                                                                                                                                                                                                                                                                                                                                                                                                                                                                                                                                                                                                                                                                                                                                                                                                                                                                                                                                                                                                                                                                                                                                                                            |         |         |         |         |         |         |         |         |          |          |          |          |          |          |          |          |          |          |          |          |          |          |          |          |          |          |          |          |          |          |          |          |          |          |          |          |          |          |          |          |          |          |          |          |          |          |          |          |          |          |          |          |          |          |          |           |           |           |           |           |           |           |           |           |           |           |           |           |           |           |           |           |           |           |           |           |           |           |           |           |           |           |           |           |           |           |           |           |           |           |           |           |           |           |           |           |           |           |           |           |           |           |           |           |           |
| 355.0341         | 378.1273                                                                                                                                                                                                                                                                                                                                                                                                                                                                                                                                                                                                                                                                                                                                                                                                                                                                                                                                                                                                                                                                                                                                                                                                                                                                                                                                                                                                                                                                                                                                                                                                                                                                                                                                                                                                                                                                                                                                                                                                                                                                                                                                                                                                                                                                                                                                                                                                                                                                                                                                                                                  | 399.7907           |          |   |   |   |          |          |          |   |          |          |         |    |          |          |          |    |          |          |         |    |         |          |          |   |          |          |         |   |          |          |         |   |          |          |          |   |          |          |          |    |         |         |          |    |         |          |         |   |         |         |          |   |         |         |         |   |         |         |         |   |         |          |         |   |         |         |         |   |         |         |         |   |          |         |          |   |         |         |         |   |          |         |         |   |          |         |          |   |          |         |          |   |          |         |          |   |          |         |         |   |          |         |         |   |          |         |         |   |          |         |          |   |          |         |         |   |          |         |          |   |          |         |          |   |          |         |          |   |          |         |         |   |         |         |          |                                                                                                                                                                                                                                                                                                                                                                                                                                                                                                                                                                                                                                                                                                                                                                                                                                                                                                                                                                                                                                                                                                                                                                                                                                                                                                                                                                                                                                                                                                                                                                                                                                                                                                                                                                                                                                                                                                                                                                                                                                                                                                                                                                                                                                                                                                                                                                            |         |         |         |         |         |         |         |         |          |          |          |          |          |          |          |          |          |          |          |          |          |          |          |          |          |          |          |          |          |          |          |          |          |          |          |          |          |          |          |          |          |          |          |          |          |          |          |          |          |          |          |          |          |          |          |           |           |           |           |           |           |           |           |           |           |           |           |           |           |           |           |           |           |           |           |           |           |           |           |           |           |           |           |           |           |           |           |           |           |           |           |           |           |           |           |           |           |           |           |           |           |           |           |           |           |
| 409.1794         | 465.5319                                                                                                                                                                                                                                                                                                                                                                                                                                                                                                                                                                                                                                                                                                                                                                                                                                                                                                                                                                                                                                                                                                                                                                                                                                                                                                                                                                                                                                                                                                                                                                                                                                                                                                                                                                                                                                                                                                                                                                                                                                                                                                                                                                                                                                                                                                                                                                                                                                                                                                                                                                                  | 467.9203           |          |   |   |   |          |          |          |   |          |          |         |    |          |          |          |    |          |          |         |    |         |          |          |   |          |          |         |   |          |          |         |   |          |          |          |   |          |          |          |    |         |         |          |    |         |          |         |   |         |         |          |   |         |         |         |   |         |         |         |   |         |          |         |   |         |         |         |   |         |         |         |   |          |         |          |   |         |         |         |   |          |         |         |   |          |         |          |   |          |         |          |   |          |         |          |   |          |         |         |   |          |         |         |   |          |         |         |   |          |         |          |   |          |         |         |   |          |         |          |   |          |         |          |   |          |         |          |   |          |         |         |   |         |         |          |                                                                                                                                                                                                                                                                                                                                                                                                                                                                                                                                                                                                                                                                                                                                                                                                                                                                                                                                                                                                                                                                                                                                                                                                                                                                                                                                                                                                                                                                                                                                                                                                                                                                                                                                                                                                                                                                                                                                                                                                                                                                                                                                                                                                                                                                                                                                                                            |         |         |         |         |         |         |         |         |          |          |          |          |          |          |          |          |          |          |          |          |          |          |          |          |          |          |          |          |          |          |          |          |          |          |          |          |          |          |          |          |          |          |          |          |          |          |          |          |          |          |          |          |          |          |          |           |           |           |           |           |           |           |           |           |           |           |           |           |           |           |           |           |           |           |           |           |           |           |           |           |           |           |           |           |           |           |           |           |           |           |           |           |           |           |           |           |           |           |           |           |           |           |           |           |           |
| 508.7802         | 534.5639                                                                                                                                                                                                                                                                                                                                                                                                                                                                                                                                                                                                                                                                                                                                                                                                                                                                                                                                                                                                                                                                                                                                                                                                                                                                                                                                                                                                                                                                                                                                                                                                                                                                                                                                                                                                                                                                                                                                                                                                                                                                                                                                                                                                                                                                                                                                                                                                                                                                                                                                                                                  | 627.3461           |          |   |   |   |          |          |          |   |          |          |         |    |          |          |          |    |          |          |         |    |         |          |          |   |          |          |         |   |          |          |         |   |          |          |          |   |          |          |          |    |         |         |          |    |         |          |         |   |         |         |          |   |         |         |         |   |         |         |         |   |         |          |         |   |         |         |         |   |         |         |         |   |          |         |          |   |         |         |         |   |          |         |         |   |          |         |          |   |          |         |          |   |          |         |          |   |          |         |         |   |          |         |         |   |          |         |         |   |          |         |          |   |          |         |         |   |          |         |          |   |          |         |          |   |          |         |          |   |          |         |         |   |         |         |          |                                                                                                                                                                                                                                                                                                                                                                                                                                                                                                                                                                                                                                                                                                                                                                                                                                                                                                                                                                                                                                                                                                                                                                                                                                                                                                                                                                                                                                                                                                                                                                                                                                                                                                                                                                                                                                                                                                                                                                                                                                                                                                                                                                                                                                                                                                                                                                            |         |         |         |         |         |         |         |         |          |          |          |          |          |          |          |          |          |          |          |          |          |          |          |          |          |          |          |          |          |          |          |          |          |          |          |          |          |          |          |          |          |          |          |          |          |          |          |          |          |          |          |          |          |          |          |           |           |           |           |           |           |           |           |           |           |           |           |           |           |           |           |           |           |           |           |           |           |           |           |           |           |           |           |           |           |           |           |           |           |           |           |           |           |           |           |           |           |           |           |           |           |           |           |           |           |
| 635.4735         | 722.8822                                                                                                                                                                                                                                                                                                                                                                                                                                                                                                                                                                                                                                                                                                                                                                                                                                                                                                                                                                                                                                                                                                                                                                                                                                                                                                                                                                                                                                                                                                                                                                                                                                                                                                                                                                                                                                                                                                                                                                                                                                                                                                                                                                                                                                                                                                                                                                                                                                                                                                                                                                                  | 745.3724           |          |   |   |   |          |          |          |   |          |          |         |    |          |          |          |    |          |          |         |    |         |          |          |   |          |          |         |   |          |          |         |   |          |          |          |   |          |          |          |    |         |         |          |    |         |          |         |   |         |         |          |   |         |         |         |   |         |         |         |   |         |          |         |   |         |         |         |   |         |         |         |   |          |         |          |   |         |         |         |   |          |         |         |   |          |         |          |   |          |         |          |   |          |         |          |   |          |         |         |   |          |         |         |   |          |         |         |   |          |         |          |   |          |         |         |   |          |         |          |   |          |         |          |   |          |         |          |   |          |         |         |   |         |         |          |                                                                                                                                                                                                                                                                                                                                                                                                                                                                                                                                                                                                                                                                                                                                                                                                                                                                                                                                                                                                                                                                                                                                                                                                                                                                                                                                                                                                                                                                                                                                                                                                                                                                                                                                                                                                                                                                                                                                                                                                                                                                                                                                                                                                                                                                                                                                                                            |         |         |         |         |         |         |         |         |          |          |          |          |          |          |          |          |          |          |          |          |          |          |          |          |          |          |          |          |          |          |          |          |          |          |          |          |          |          |          |          |          |          |          |          |          |          |          |          |          |          |          |          |          |          |          |           |           |           |           |           |           |           |           |           |           |           |           |           |           |           |           |           |           |           |           |           |           |           |           |           |           |           |           |           |           |           |           |           |           |           |           |           |           |           |           |           |           |           |           |           |           |           |           |           |           |
| 759.2724         | 781.7043                                                                                                                                                                                                                                                                                                                                                                                                                                                                                                                                                                                                                                                                                                                                                                                                                                                                                                                                                                                                                                                                                                                                                                                                                                                                                                                                                                                                                                                                                                                                                                                                                                                                                                                                                                                                                                                                                                                                                                                                                                                                                                                                                                                                                                                                                                                                                                                                                                                                                                                                                                                  | 814.2947           |          |   |   |   |          |          |          |   |          |          |         |    |          |          |          |    |          |          |         |    |         |          |          |   |          |          |         |   |          |          |         |   |          |          |          |   |          |          |          |    |         |         |          |    |         |          |         |   |         |         |          |   |         |         |         |   |         |         |         |   |         |          |         |   |         |         |         |   |         |         |         |   |          |         |          |   |         |         |         |   |          |         |         |   |          |         |          |   |          |         |          |   |          |         |          |   |          |         |         |   |          |         |         |   |          |         |         |   |          |         |          |   |          |         |         |   |          |         |          |   |          |         |          |   |          |         |          |   |          |         |         |   |         |         |          |                                                                                                                                                                                                                                                                                                                                                                                                                                                                                                                                                                                                                                                                                                                                                                                                                                                                                                                                                                                                                                                                                                                                                                                                                                                                                                                                                                                                                                                                                                                                                                                                                                                                                                                                                                                                                                                                                                                                                                                                                                                                                                                                                                                                                                                                                                                                                                            |         |         |         |         |         |         |         |         |          |          |          |          |          |          |          |          |          |          |          |          |          |          |          |          |          |          |          |          |          |          |          |          |          |          |          |          |          |          |          |          |          |          |          |          |          |          |          |          |          |          |          |          |          |          |          |           |           |           |           |           |           |           |           |           |           |           |           |           |           |           |           |           |           |           |           |           |           |           |           |           |           |           |           |           |           |           |           |           |           |           |           |           |           |           |           |           |           |           |           |           |           |           |           |           |           |
| 817.7997         | 840.2448                                                                                                                                                                                                                                                                                                                                                                                                                                                                                                                                                                                                                                                                                                                                                                                                                                                                                                                                                                                                                                                                                                                                                                                                                                                                                                                                                                                                                                                                                                                                                                                                                                                                                                                                                                                                                                                                                                                                                                                                                                                                                                                                                                                                                                                                                                                                                                                                                                                                                                                                                                                  | 859.5514           |          |   |   |   |          |          |          |   |          |          |         |    |          |          |          |    |          |          |         |    |         |          |          |   |          |          |         |   |          |          |         |   |          |          |          |   |          |          |          |    |         |         |          |    |         |          |         |   |         |         |          |   |         |         |         |   |         |         |         |   |         |          |         |   |         |         |         |   |         |         |         |   |          |         |          |   |         |         |         |   |          |         |         |   |          |         |          |   |          |         |          |   |          |         |          |   |          |         |         |   |          |         |         |   |          |         |         |   |          |         |          |   |          |         |         |   |          |         |          |   |          |         |          |   |          |         |          |   |          |         |         |   |         |         |          |                                                                                                                                                                                                                                                                                                                                                                                                                                                                                                                                                                                                                                                                                                                                                                                                                                                                                                                                                                                                                                                                                                                                                                                                                                                                                                                                                                                                                                                                                                                                                                                                                                                                                                                                                                                                                                                                                                                                                                                                                                                                                                                                                                                                                                                                                                                                                                            |         |         |         |         |         |         |         |         |          |          |          |          |          |          |          |          |          |          |          |          |          |          |          |          |          |          |          |          |          |          |          |          |          |          |          |          |          |          |          |          |          |          |          |          |          |          |          |          |          |          |          |          |          |          |          |           |           |           |           |           |           |           |           |           |           |           |           |           |           |           |           |           |           |           |           |           |           |           |           |           |           |           |           |           |           |           |           |           |           |           |           |           |           |           |           |           |           |           |           |           |           |           |           |           |           |
| 897.7097         | 907.2461                                                                                                                                                                                                                                                                                                                                                                                                                                                                                                                                                                                                                                                                                                                                                                                                                                                                                                                                                                                                                                                                                                                                                                                                                                                                                                                                                                                                                                                                                                                                                                                                                                                                                                                                                                                                                                                                                                                                                                                                                                                                                                                                                                                                                                                                                                                                                                                                                                                                                                                                                                                  | 929.6611           |          |   |   |   |          |          |          |   |          |          |         |    |          |          |          |    |          |          |         |    |         |          |          |   |          |          |         |   |          |          |         |   |          |          |          |   |          |          |          |    |         |         |          |    |         |          |         |   |         |         |          |   |         |         |         |   |         |         |         |   |         |          |         |   |         |         |         |   |         |         |         |   |          |         |          |   |         |         |         |   |          |         |         |   |          |         |          |   |          |         |          |   |          |         |          |   |          |         |         |   |          |         |         |   |          |         |         |   |          |         |          |   |          |         |         |   |          |         |          |   |          |         |          |   |          |         |          |   |          |         |         |   |         |         |          |                                                                                                                                                                                                                                                                                                                                                                                                                                                                                                                                                                                                                                                                                                                                                                                                                                                                                                                                                                                                                                                                                                                                                                                                                                                                                                                                                                                                                                                                                                                                                                                                                                                                                                                                                                                                                                                                                                                                                                                                                                                                                                                                                                                                                                                                                                                                                                            |         |         |         |         |         |         |         |         |          |          |          |          |          |          |          |          |          |          |          |          |          |          |          |          |          |          |          |          |          |          |          |          |          |          |          |          |          |          |          |          |          |          |          |          |          |          |          |          |          |          |          |          |          |          |          |           |           |           |           |           |           |           |           |           |           |           |           |           |           |           |           |           |           |           |           |           |           |           |           |           |           |           |           |           |           |           |           |           |           |           |           |           |           |           |           |           |           |           |           |           |           |           |           |           |           |
| 934.6442         | 955.6379                                                                                                                                                                                                                                                                                                                                                                                                                                                                                                                                                                                                                                                                                                                                                                                                                                                                                                                                                                                                                                                                                                                                                                                                                                                                                                                                                                                                                                                                                                                                                                                                                                                                                                                                                                                                                                                                                                                                                                                                                                                                                                                                                                                                                                                                                                                                                                                                                                                                                                                                                                                  | 961.6924           |          |   |   |   |          |          |          |   |          |          |         |    |          |          |          |    |          |          |         |    |         |          |          |   |          |          |         |   |          |          |         |   |          |          |          |   |          |          |          |    |         |         |          |    |         |          |         |   |         |         |          |   |         |         |         |   |         |         |         |   |         |          |         |   |         |         |         |   |         |         |         |   |          |         |          |   |         |         |         |   |          |         |         |   |          |         |          |   |          |         |          |   |          |         |          |   |          |         |         |   |          |         |         |   |          |         |         |   |          |         |          |   |          |         |         |   |          |         |          |   |          |         |          |   |          |         |          |   |          |         |         |   |         |         |          |                                                                                                                                                                                                                                                                                                                                                                                                                                                                                                                                                                                                                                                                                                                                                                                                                                                                                                                                                                                                                                                                                                                                                                                                                                                                                                                                                                                                                                                                                                                                                                                                                                                                                                                                                                                                                                                                                                                                                                                                                                                                                                                                                                                                                                                                                                                                                                            |         |         |         |         |         |         |         |         |          |          |          |          |          |          |          |          |          |          |          |          |          |          |          |          |          |          |          |          |          |          |          |          |          |          |          |          |          |          |          |          |          |          |          |          |          |          |          |          |          |          |          |          |          |          |          |           |           |           |           |           |           |           |           |           |           |           |           |           |           |           |           |           |           |           |           |           |           |           |           |           |           |           |           |           |           |           |           |           |           |           |           |           |           |           |           |           |           |           |           |           |           |           |           |           |           |
| 996.3577         | 1005.0683                                                                                                                                                                                                                                                                                                                                                                                                                                                                                                                                                                                                                                                                                                                                                                                                                                                                                                                                                                                                                                                                                                                                                                                                                                                                                                                                                                                                                                                                                                                                                                                                                                                                                                                                                                                                                                                                                                                                                                                                                                                                                                                                                                                                                                                                                                                                                                                                                                                                                                                                                                                 | 1020.0098          |          |   |   |   |          |          |          |   |          |          |         |    |          |          |          |    |          |          |         |    |         |          |          |   |          |          |         |   |          |          |         |   |          |          |          |   |          |          |          |    |         |         |          |    |         |          |         |   |         |         |          |   |         |         |         |   |         |         |         |   |         |          |         |   |         |         |         |   |         |         |         |   |          |         |          |   |         |         |         |   |          |         |         |   |          |         |          |   |          |         |          |   |          |         |          |   |          |         |         |   |          |         |         |   |          |         |         |   |          |         |          |   |          |         |         |   |          |         |          |   |          |         |          |   |          |         |          |   |          |         |         |   |         |         |          |                                                                                                                                                                                                                                                                                                                                                                                                                                                                                                                                                                                                                                                                                                                                                                                                                                                                                                                                                                                                                                                                                                                                                                                                                                                                                                                                                                                                                                                                                                                                                                                                                                                                                                                                                                                                                                                                                                                                                                                                                                                                                                                                                                                                                                                                                                                                                                            |         |         |         |         |         |         |         |         |          |          |          |          |          |          |          |          |          |          |          |          |          |          |          |          |          |          |          |          |          |          |          |          |          |          |          |          |          |          |          |          |          |          |          |          |          |          |          |          |          |          |          |          |          |          |          |           |           |           |           |           |           |           |           |           |           |           |           |           |           |           |           |           |           |           |           |           |           |           |           |           |           |           |           |           |           |           |           |           |           |           |           |           |           |           |           |           |           |           |           |           |           |           |           |           |           |
| 1026.2404        | 1039.5282                                                                                                                                                                                                                                                                                                                                                                                                                                                                                                                                                                                                                                                                                                                                                                                                                                                                                                                                                                                                                                                                                                                                                                                                                                                                                                                                                                                                                                                                                                                                                                                                                                                                                                                                                                                                                                                                                                                                                                                                                                                                                                                                                                                                                                                                                                                                                                                                                                                                                                                                                                                 | 1048.1171          |          |   |   |   |          |          |          |   |          |          |         |    |          |          |          |    |          |          |         |    |         |          |          |   |          |          |         |   |          |          |         |   |          |          |          |   |          |          |          |    |         |         |          |    |         |          |         |   |         |         |          |   |         |         |         |   |         |         |         |   |         |          |         |   |         |         |         |   |         |         |         |   |          |         |          |   |         |         |         |   |          |         |         |   |          |         |          |   |          |         |          |   |          |         |          |   |          |         |         |   |          |         |         |   |          |         |         |   |          |         |          |   |          |         |         |   |          |         |          |   |          |         |          |   |          |         |          |   |          |         |         |   |         |         |          |                                                                                                                                                                                                                                                                                                                                                                                                                                                                                                                                                                                                                                                                                                                                                                                                                                                                                                                                                                                                                                                                                                                                                                                                                                                                                                                                                                                                                                                                                                                                                                                                                                                                                                                                                                                                                                                                                                                                                                                                                                                                                                                                                                                                                                                                                                                                                                            |         |         |         |         |         |         |         |         |          |          |          |          |          |          |          |          |          |          |          |          |          |          |          |          |          |          |          |          |          |          |          |          |          |          |          |          |          |          |          |          |          |          |          |          |          |          |          |          |          |          |          |          |          |          |          |           |           |           |           |           |           |           |           |           |           |           |           |           |           |           |           |           |           |           |           |           |           |           |           |           |           |           |           |           |           |           |           |           |           |           |           |           |           |           |           |           |           |           |           |           |           |           |           |           |           |
| 1058.2914        | 1063.1750                                                                                                                                                                                                                                                                                                                                                                                                                                                                                                                                                                                                                                                                                                                                                                                                                                                                                                                                                                                                                                                                                                                                                                                                                                                                                                                                                                                                                                                                                                                                                                                                                                                                                                                                                                                                                                                                                                                                                                                                                                                                                                                                                                                                                                                                                                                                                                                                                                                                                                                                                                                 | 1085.8840          |          |   |   |   |          |          |          |   |          |          |         |    |          |          |          |    |          |          |         |    |         |          |          |   |          |          |         |   |          |          |         |   |          |          |          |   |          |          |          |    |         |         |          |    |         |          |         |   |         |         |          |   |         |         |         |   |         |         |         |   |         |          |         |   |         |         |         |   |         |         |         |   |          |         |          |   |         |         |         |   |          |         |         |   |          |         |          |   |          |         |          |   |          |         |          |   |          |         |         |   |          |         |         |   |          |         |         |   |          |         |          |   |          |         |         |   |          |         |          |   |          |         |          |   |          |         |          |   |          |         |         |   |         |         |          |                                                                                                                                                                                                                                                                                                                                                                                                                                                                                                                                                                                                                                                                                                                                                                                                                                                                                                                                                                                                                                                                                                                                                                                                                                                                                                                                                                                                                                                                                                                                                                                                                                                                                                                                                                                                                                                                                                                                                                                                                                                                                                                                                                                                                                                                                                                                                                            |         |         |         |         |         |         |         |         |          |          |          |          |          |          |          |          |          |          |          |          |          |          |          |          |          |          |          |          |          |          |          |          |          |          |          |          |          |          |          |          |          |          |          |          |          |          |          |          |          |          |          |          |          |          |          |           |           |           |           |           |           |           |           |           |           |           |           |           |           |           |           |           |           |           |           |           |           |           |           |           |           |           |           |           |           |           |           |           |           |           |           |           |           |           |           |           |           |           |           |           |           |           |           |           |           |
| 1096.0103        | 1100.4278                                                                                                                                                                                                                                                                                                                                                                                                                                                                                                                                                                                                                                                                                                                                                                                                                                                                                                                                                                                                                                                                                                                                                                                                                                                                                                                                                                                                                                                                                                                                                                                                                                                                                                                                                                                                                                                                                                                                                                                                                                                                                                                                                                                                                                                                                                                                                                                                                                                                                                                                                                                 | 1115.9262          |          |   |   |   |          |          |          |   |          |          |         |    |          |          |          |    |          |          |         |    |         |          |          |   |          |          |         |   |          |          |         |   |          |          |          |   |          |          |          |    |         |         |          |    |         |          |         |   |         |         |          |   |         |         |         |   |         |         |         |   |         |          |         |   |         |         |         |   |         |         |         |   |          |         |          |   |         |         |         |   |          |         |         |   |          |         |          |   |          |         |          |   |          |         |          |   |          |         |         |   |          |         |         |   |          |         |         |   |          |         |          |   |          |         |         |   |          |         |          |   |          |         |          |   |          |         |          |   |          |         |         |   |         |         |          |                                                                                                                                                                                                                                                                                                                                                                                                                                                                                                                                                                                                                                                                                                                                                                                                                                                                                                                                                                                                                                                                                                                                                                                                                                                                                                                                                                                                                                                                                                                                                                                                                                                                                                                                                                                                                                                                                                                                                                                                                                                                                                                                                                                                                                                                                                                                                                            |         |         |         |         |         |         |         |         |          |          |          |          |          |          |          |          |          |          |          |          |          |          |          |          |          |          |          |          |          |          |          |          |          |          |          |          |          |          |          |          |          |          |          |          |          |          |          |          |          |          |          |          |          |          |          |           |           |           |           |           |           |           |           |           |           |           |           |           |           |           |           |           |           |           |           |           |           |           |           |           |           |           |           |           |           |           |           |           |           |           |           |           |           |           |           |           |           |           |           |           |           |           |           |           |           |
| 1140.4784        | 1176.8284                                                                                                                                                                                                                                                                                                                                                                                                                                                                                                                                                                                                                                                                                                                                                                                                                                                                                                                                                                                                                                                                                                                                                                                                                                                                                                                                                                                                                                                                                                                                                                                                                                                                                                                                                                                                                                                                                                                                                                                                                                                                                                                                                                                                                                                                                                                                                                                                                                                                                                                                                                                 | 1220.8614          |          |   |   |   |          |          |          |   |          |          |         |    |          |          |          |    |          |          |         |    |         |          |          |   |          |          |         |   |          |          |         |   |          |          |          |   |          |          |          |    |         |         |          |    |         |          |         |   |         |         |          |   |         |         |         |   |         |         |         |   |         |          |         |   |         |         |         |   |         |         |         |   |          |         |          |   |         |         |         |   |          |         |         |   |          |         |          |   |          |         |          |   |          |         |          |   |          |         |         |   |          |         |         |   |          |         |         |   |          |         |          |   |          |         |         |   |          |         |          |   |          |         |          |   |          |         |          |   |          |         |         |   |         |         |          |                                                                                                                                                                                                                                                                                                                                                                                                                                                                                                                                                                                                                                                                                                                                                                                                                                                                                                                                                                                                                                                                                                                                                                                                                                                                                                                                                                                                                                                                                                                                                                                                                                                                                                                                                                                                                                                                                                                                                                                                                                                                                                                                                                                                                                                                                                                                                                            |         |         |         |         |         |         |         |         |          |          |          |          |          |          |          |          |          |          |          |          |          |          |          |          |          |          |          |          |          |          |          |          |          |          |          |          |          |          |          |          |          |          |          |          |          |          |          |          |          |          |          |          |          |          |          |           |           |           |           |           |           |           |           |           |           |           |           |           |           |           |           |           |           |           |           |           |           |           |           |           |           |           |           |           |           |           |           |           |           |           |           |           |           |           |           |           |           |           |           |           |           |           |           |           |           |
| 1226.0971        | 1232.8538                                                                                                                                                                                                                                                                                                                                                                                                                                                                                                                                                                                                                                                                                                                                                                                                                                                                                                                                                                                                                                                                                                                                                                                                                                                                                                                                                                                                                                                                                                                                                                                                                                                                                                                                                                                                                                                                                                                                                                                                                                                                                                                                                                                                                                                                                                                                                                                                                                                                                                                                                                                 | 1265.6482          |          |   |   |   |          |          |          |   |          |          |         |    |          |          |          |    |          |          |         |    |         |          |          |   |          |          |         |   |          |          |         |   |          |          |          |   |          |          |          |    |         |         |          |    |         |          |         |   |         |         |          |   |         |         |         |   |         |         |         |   |         |          |         |   |         |         |         |   |         |         |         |   |          |         |          |   |         |         |         |   |          |         |         |   |          |         |          |   |          |         |          |   |          |         |          |   |          |         |         |   |          |         |         |   |          |         |         |   |          |         |          |   |          |         |         |   |          |         |          |   |          |         |          |   |          |         |          |   |          |         |         |   |         |         |          |                                                                                                                                                                                                                                                                                                                                                                                                                                                                                                                                                                                                                                                                                                                                                                                                                                                                                                                                                                                                                                                                                                                                                                                                                                                                                                                                                                                                                                                                                                                                                                                                                                                                                                                                                                                                                                                                                                                                                                                                                                                                                                                                                                                                                                                                                                                                                                            |         |         |         |         |         |         |         |         |          |          |          |          |          |          |          |          |          |          |          |          |          |          |          |          |          |          |          |          |          |          |          |          |          |          |          |          |          |          |          |          |          |          |          |          |          |          |          |          |          |          |          |          |          |          |          |           |           |           |           |           |           |           |           |           |           |           |           |           |           |           |           |           |           |           |           |           |           |           |           |           |           |           |           |           |           |           |           |           |           |           |           |           |           |           |           |           |           |           |           |           |           |           |           |           |           |
| 1270.8594        | 1281.8584                                                                                                                                                                                                                                                                                                                                                                                                                                                                                                                                                                                                                                                                                                                                                                                                                                                                                                                                                                                                                                                                                                                                                                                                                                                                                                                                                                                                                                                                                                                                                                                                                                                                                                                                                                                                                                                                                                                                                                                                                                                                                                                                                                                                                                                                                                                                                                                                                                                                                                                                                                                 | 1288.5556          |          |   |   |   |          |          |          |   |          |          |         |    |          |          |          |    |          |          |         |    |         |          |          |   |          |          |         |   |          |          |         |   |          |          |          |   |          |          |          |    |         |         |          |    |         |          |         |   |         |         |          |   |         |         |         |   |         |         |         |   |         |          |         |   |         |         |         |   |         |         |         |   |          |         |          |   |         |         |         |   |          |         |         |   |          |         |          |   |          |         |          |   |          |         |          |   |          |         |         |   |          |         |         |   |          |         |         |   |          |         |          |   |          |         |         |   |          |         |          |   |          |         |          |   |          |         |          |   |          |         |         |   |         |         |          |                                                                                                                                                                                                                                                                                                                                                                                                                                                                                                                                                                                                                                                                                                                                                                                                                                                                                                                                                                                                                                                                                                                                                                                                                                                                                                                                                                                                                                                                                                                                                                                                                                                                                                                                                                                                                                                                                                                                                                                                                                                                                                                                                                                                                                                                                                                                                                            |         |         |         |         |         |         |         |         |          |          |          |          |          |          |          |          |          |          |          |          |          |          |          |          |          |          |          |          |          |          |          |          |          |          |          |          |          |          |          |          |          |          |          |          |          |          |          |          |          |          |          |          |          |          |          |           |           |           |           |           |           |           |           |           |           |           |           |           |           |           |           |           |           |           |           |           |           |           |           |           |           |           |           |           |           |           |           |           |           |           |           |           |           |           |           |           |           |           |           |           |           |           |           |           |           |
| 1342.0840        | 1352.7470                                                                                                                                                                                                                                                                                                                                                                                                                                                                                                                                                                                                                                                                                                                                                                                                                                                                                                                                                                                                                                                                                                                                                                                                                                                                                                                                                                                                                                                                                                                                                                                                                                                                                                                                                                                                                                                                                                                                                                                                                                                                                                                                                                                                                                                                                                                                                                                                                                                                                                                                                                                 | 1361.2473          |          |   |   |   |          |          |          |   |          |          |         |    |          |          |          |    |          |          |         |    |         |          |          |   |          |          |         |   |          |          |         |   |          |          |          |   |          |          |          |    |         |         |          |    |         |          |         |   |         |         |          |   |         |         |         |   |         |         |         |   |         |          |         |   |         |         |         |   |         |         |         |   |          |         |          |   |         |         |         |   |          |         |         |   |          |         |          |   |          |         |          |   |          |         |          |   |          |         |         |   |          |         |         |   |          |         |         |   |          |         |          |   |          |         |         |   |          |         |          |   |          |         |          |   |          |         |          |   |          |         |         |   |         |         |          |                                                                                                                                                                                                                                                                                                                                                                                                                                                                                                                                                                                                                                                                                                                                                                                                                                                                                                                                                                                                                                                                                                                                                                                                                                                                                                                                                                                                                                                                                                                                                                                                                                                                                                                                                                                                                                                                                                                                                                                                                                                                                                                                                                                                                                                                                                                                                                            |         |         |         |         |         |         |         |         |          |          |          |          |          |          |          |          |          |          |          |          |          |          |          |          |          |          |          |          |          |          |          |          |          |          |          |          |          |          |          |          |          |          |          |          |          |          |          |          |          |          |          |          |          |          |          |           |           |           |           |           |           |           |           |           |           |           |           |           |           |           |           |           |           |           |           |           |           |           |           |           |           |           |           |           |           |           |           |           |           |           |           |           |           |           |           |           |           |           |           |           |           |           |           |           |           |
| 1366.1764        | 1413.3750                                                                                                                                                                                                                                                                                                                                                                                                                                                                                                                                                                                                                                                                                                                                                                                                                                                                                                                                                                                                                                                                                                                                                                                                                                                                                                                                                                                                                                                                                                                                                                                                                                                                                                                                                                                                                                                                                                                                                                                                                                                                                                                                                                                                                                                                                                                                                                                                                                                                                                                                                                                 | 1456.7034          |          |   |   |   |          |          |          |   |          |          |         |    |          |          |          |    |          |          |         |    |         |          |          |   |          |          |         |   |          |          |         |   |          |          |          |   |          |          |          |    |         |         |          |    |         |          |         |   |         |         |          |   |         |         |         |   |         |         |         |   |         |          |         |   |         |         |         |   |         |         |         |   |          |         |          |   |         |         |         |   |          |         |         |   |          |         |          |   |          |         |          |   |          |         |          |   |          |         |         |   |          |         |         |   |          |         |         |   |          |         |          |   |          |         |         |   |          |         |          |   |          |         |          |   |          |         |          |   |          |         |         |   |         |         |          |                                                                                                                                                                                                                                                                                                                                                                                                                                                                                                                                                                                                                                                                                                                                                                                                                                                                                                                                                                                                                                                                                                                                                                                                                                                                                                                                                                                                                                                                                                                                                                                                                                                                                                                                                                                                                                                                                                                                                                                                                                                                                                                                                                                                                                                                                                                                                                            |         |         |         |         |         |         |         |         |          |          |          |          |          |          |          |          |          |          |          |          |          |          |          |          |          |          |          |          |          |          |          |          |          |          |          |          |          |          |          |          |          |          |          |          |          |          |          |          |          |          |          |          |          |          |          |           |           |           |           |           |           |           |           |           |           |           |           |           |           |           |           |           |           |           |           |           |           |           |           |           |           |           |           |           |           |           |           |           |           |           |           |           |           |           |           |           |           |           |           |           |           |           |           |           |           |
| 1473.1722        | 1484.9250                                                                                                                                                                                                                                                                                                                                                                                                                                                                                                                                                                                                                                                                                                                                                                                                                                                                                                                                                                                                                                                                                                                                                                                                                                                                                                                                                                                                                                                                                                                                                                                                                                                                                                                                                                                                                                                                                                                                                                                                                                                                                                                                                                                                                                                                                                                                                                                                                                                                                                                                                                                 | 1497.9599          |          |   |   |   |          |          |          |   |          |          |         |    |          |          |          |    |          |          |         |    |         |          |          |   |          |          |         |   |          |          |         |   |          |          |          |   |          |          |          |    |         |         |          |    |         |          |         |   |         |         |          |   |         |         |         |   |         |         |         |   |         |          |         |   |         |         |         |   |         |         |         |   |          |         |          |   |         |         |         |   |          |         |         |   |          |         |          |   |          |         |          |   |          |         |          |   |          |         |         |   |          |         |         |   |          |         |         |   |          |         |          |   |          |         |         |   |          |         |          |   |          |         |          |   |          |         |          |   |          |         |         |   |         |         |          |                                                                                                                                                                                                                                                                                                                                                                                                                                                                                                                                                                                                                                                                                                                                                                                                                                                                                                                                                                                                                                                                                                                                                                                                                                                                                                                                                                                                                                                                                                                                                                                                                                                                                                                                                                                                                                                                                                                                                                                                                                                                                                                                                                                                                                                                                                                                                                            |         |         |         |         |         |         |         |         |          |          |          |          |          |          |          |          |          |          |          |          |          |          |          |          |          |          |          |          |          |          |          |          |          |          |          |          |          |          |          |          |          |          |          |          |          |          |          |          |          |          |          |          |          |          |          |           |           |           |           |           |           |           |           |           |           |           |           |           |           |           |           |           |           |           |           |           |           |           |           |           |           |           |           |           |           |           |           |           |           |           |           |           |           |           |           |           |           |           |           |           |           |           |           |           |           |
| 1502.4645        | 1527.4084                                                                                                                                                                                                                                                                                                                                                                                                                                                                                                                                                                                                                                                                                                                                                                                                                                                                                                                                                                                                                                                                                                                                                                                                                                                                                                                                                                                                                                                                                                                                                                                                                                                                                                                                                                                                                                                                                                                                                                                                                                                                                                                                                                                                                                                                                                                                                                                                                                                                                                                                                                                 | 1569.7373          |          |   |   |   |          |          |          |   |          |          |         |    |          |          |          |    |          |          |         |    |         |          |          |   |          |          |         |   |          |          |         |   |          |          |          |   |          |          |          |    |         |         |          |    |         |          |         |   |         |         |          |   |         |         |         |   |         |         |         |   |         |          |         |   |         |         |         |   |         |         |         |   |          |         |          |   |         |         |         |   |          |         |         |   |          |         |          |   |          |         |          |   |          |         |          |   |          |         |         |   |          |         |         |   |          |         |         |   |          |         |          |   |          |         |         |   |          |         |          |   |          |         |          |   |          |         |          |   |          |         |         |   |         |         |          |                                                                                                                                                                                                                                                                                                                                                                                                                                                                                                                                                                                                                                                                                                                                                                                                                                                                                                                                                                                                                                                                                                                                                                                                                                                                                                                                                                                                                                                                                                                                                                                                                                                                                                                                                                                                                                                                                                                                                                                                                                                                                                                                                                                                                                                                                                                                                                            |         |         |         |         |         |         |         |         |          |          |          |          |          |          |          |          |          |          |          |          |          |          |          |          |          |          |          |          |          |          |          |          |          |          |          |          |          |          |          |          |          |          |          |          |          |          |          |          |          |          |          |          |          |          |          |           |           |           |           |           |           |           |           |           |           |           |           |           |           |           |           |           |           |           |           |           |           |           |           |           |           |           |           |           |           |           |           |           |           |           |           |           |           |           |           |           |           |           |           |           |           |           |           |           |           |
| 1651.4104        | 2273.5073                                                                                                                                                                                                                                                                                                                                                                                                                                                                                                                                                                                                                                                                                                                                                                                                                                                                                                                                                                                                                                                                                                                                                                                                                                                                                                                                                                                                                                                                                                                                                                                                                                                                                                                                                                                                                                                                                                                                                                                                                                                                                                                                                                                                                                                                                                                                                                                                                                                                                                                                                                                 | 2290.4501          |          |   |   |   |          |          |          |   |          |          |         |    |          |          |          |    |          |          |         |    |         |          |          |   |          |          |         |   |          |          |         |   |          |          |          |   |          |          |          |    |         |         |          |    |         |          |         |   |         |         |          |   |         |         |         |   |         |         |         |   |         |          |         |   |         |         |         |   |         |         |         |   |          |         |          |   |         |         |         |   |          |         |         |   |          |         |          |   |          |         |          |   |          |         |          |   |          |         |         |   |          |         |         |   |          |         |         |   |          |         |          |   |          |         |         |   |          |         |          |   |          |         |          |   |          |         |          |   |          |         |         |   |         |         |          |                                                                                                                                                                                                                                                                                                                                                                                                                                                                                                                                                                                                                                                                                                                                                                                                                                                                                                                                                                                                                                                                                                                                                                                                                                                                                                                                                                                                                                                                                                                                                                                                                                                                                                                                                                                                                                                                                                                                                                                                                                                                                                                                                                                                                                                                                                                                                                            |         |         |         |         |         |         |         |         |          |          |          |          |          |          |          |          |          |          |          |          |          |          |          |          |          |          |          |          |          |          |          |          |          |          |          |          |          |          |          |          |          |          |          |          |          |          |          |          |          |          |          |          |          |          |          |           |           |           |           |           |           |           |           |           |           |           |           |           |           |           |           |           |           |           |           |           |           |           |           |           |           |           |           |           |           |           |           |           |           |           |           |           |           |           |           |           |           |           |           |           |           |           |           |           |           |
| 2314.7930        | 3078.0602                                                                                                                                                                                                                                                                                                                                                                                                                                                                                                                                                                                                                                                                                                                                                                                                                                                                                                                                                                                                                                                                                                                                                                                                                                                                                                                                                                                                                                                                                                                                                                                                                                                                                                                                                                                                                                                                                                                                                                                                                                                                                                                                                                                                                                                                                                                                                                                                                                                                                                                                                                                 | 3080.5707          |          |   |   |   |          |          |          |   |          |          |         |    |          |          |          |    |          |          |         |    |         |          |          |   |          |          |         |   |          |          |         |   |          |          |          |   |          |          |          |    |         |         |          |    |         |          |         |   |         |         |          |   |         |         |         |   |         |         |         |   |         |          |         |   |         |         |         |   |         |         |         |   |          |         |          |   |         |         |         |   |          |         |         |   |          |         |          |   |          |         |          |   |          |         |          |   |          |         |         |   |          |         |         |   |          |         |         |   |          |         |          |   |          |         |         |   |          |         |          |   |          |         |          |   |          |         |          |   |          |         |         |   |         |         |          |                                                                                                                                                                                                                                                                                                                                                                                                                                                                                                                                                                                                                                                                                                                                                                                                                                                                                                                                                                                                                                                                                                                                                                                                                                                                                                                                                                                                                                                                                                                                                                                                                                                                                                                                                                                                                                                                                                                                                                                                                                                                                                                                                                                                                                                                                                                                                                            |         |         |         |         |         |         |         |         |          |          |          |          |          |          |          |          |          |          |          |          |          |          |          |          |          |          |          |          |          |          |          |          |          |          |          |          |          |          |          |          |          |          |          |          |          |          |          |          |          |          |          |          |          |          |          |           |           |           |           |           |           |           |           |           |           |           |           |           |           |           |           |           |           |           |           |           |           |           |           |           |           |           |           |           |           |           |           |           |           |           |           |           |           |           |           |           |           |           |           |           |           |           |           |           |           |
| 3101.5395        | 3129.3293                                                                                                                                                                                                                                                                                                                                                                                                                                                                                                                                                                                                                                                                                                                                                                                                                                                                                                                                                                                                                                                                                                                                                                                                                                                                                                                                                                                                                                                                                                                                                                                                                                                                                                                                                                                                                                                                                                                                                                                                                                                                                                                                                                                                                                                                                                                                                                                                                                                                                                                                                                                 | 3139.5187          |          |   |   |   |          |          |          |   |          |          |         |    |          |          |          |    |          |          |         |    |         |          |          |   |          |          |         |   |          |          |         |   |          |          |          |   |          |          |          |    |         |         |          |    |         |          |         |   |         |         |          |   |         |         |         |   |         |         |         |   |         |          |         |   |         |         |         |   |         |         |         |   |          |         |          |   |         |         |         |   |          |         |         |   |          |         |          |   |          |         |          |   |          |         |          |   |          |         |         |   |          |         |         |   |          |         |         |   |          |         |          |   |          |         |         |   |          |         |          |   |          |         |          |   |          |         |          |   |          |         |         |   |         |         |          |                                                                                                                                                                                                                                                                                                                                                                                                                                                                                                                                                                                                                                                                                                                                                                                                                                                                                                                                                                                                                                                                                                                                                                                                                                                                                                                                                                                                                                                                                                                                                                                                                                                                                                                                                                                                                                                                                                                                                                                                                                                                                                                                                                                                                                                                                                                                                                            |         |         |         |         |         |         |         |         |          |          |          |          |          |          |          |          |          |          |          |          |          |          |          |          |          |          |          |          |          |          |          |          |          |          |          |          |          |          |          |          |          |          |          |          |          |          |          |          |          |          |          |          |          |          |          |           |           |           |           |           |           |           |           |           |           |           |           |           |           |           |           |           |           |           |           |           |           |           |           |           |           |           |           |           |           |           |           |           |           |           |           |           |           |           |           |           |           |           |           |           |           |           |           |           |           |
| 3160.4829        | 3171.4812                                                                                                                                                                                                                                                                                                                                                                                                                                                                                                                                                                                                                                                                                                                                                                                                                                                                                                                                                                                                                                                                                                                                                                                                                                                                                                                                                                                                                                                                                                                                                                                                                                                                                                                                                                                                                                                                                                                                                                                                                                                                                                                                                                                                                                                                                                                                                                                                                                                                                                                                                                                 | 3173.7768          |          |   |   |   |          |          |          |   |          |          |         |    |          |          |          |    |          |          |         |    |         |          |          |   |          |          |         |   |          |          |         |   |          |          |          |   |          |          |          |    |         |         |          |    |         |          |         |   |         |         |          |   |         |         |         |   |         |         |         |   |         |          |         |   |         |         |         |   |         |         |         |   |          |         |          |   |         |         |         |   |          |         |         |   |          |         |          |   |          |         |          |   |          |         |          |   |          |         |         |   |          |         |         |   |          |         |         |   |          |         |          |   |          |         |         |   |          |         |          |   |          |         |          |   |          |         |          |   |          |         |         |   |         |         |          |                                                                                                                                                                                                                                                                                                                                                                                                                                                                                                                                                                                                                                                                                                                                                                                                                                                                                                                                                                                                                                                                                                                                                                                                                                                                                                                                                                                                                                                                                                                                                                                                                                                                                                                                                                                                                                                                                                                                                                                                                                                                                                                                                                                                                                                                                                                                                                            |         |         |         |         |         |         |         |         |          |          |          |          |          |          |          |          |          |          |          |          |          |          |          |          |          |          |          |          |          |          |          |          |          |          |          |          |          |          |          |          |          |          |          |          |          |          |          |          |          |          |          |          |          |          |          |           |           |           |           |           |           |           |           |           |           |           |           |           |           |           |           |           |           |           |           |           |           |           |           |           |           |           |           |           |           |           |           |           |           |           |           |           |           |           |           |           |           |           |           |           |           |           |           |           |           |
| 3178.6361        | 3182.6752                                                                                                                                                                                                                                                                                                                                                                                                                                                                                                                                                                                                                                                                                                                                                                                                                                                                                                                                                                                                                                                                                                                                                                                                                                                                                                                                                                                                                                                                                                                                                                                                                                                                                                                                                                                                                                                                                                                                                                                                                                                                                                                                                                                                                                                                                                                                                                                                                                                                                                                                                                                 | 3185.9678          |          |   |   |   |          |          |          |   |          |          |         |    |          |          |          |    |          |          |         |    |         |          |          |   |          |          |         |   |          |          |         |   |          |          |          |   |          |          |          |    |         |         |          |    |         |          |         |   |         |         |          |   |         |         |         |   |         |         |         |   |         |          |         |   |         |         |         |   |         |         |         |   |          |         |          |   |         |         |         |   |          |         |         |   |          |         |          |   |          |         |          |   |          |         |          |   |          |         |         |   |          |         |         |   |          |         |         |   |          |         |          |   |          |         |         |   |          |         |          |   |          |         |          |   |          |         |          |   |          |         |         |   |         |         |          |                                                                                                                                                                                                                                                                                                                                                                                                                                                                                                                                                                                                                                                                                                                                                                                                                                                                                                                                                                                                                                                                                                                                                                                                                                                                                                                                                                                                                                                                                                                                                                                                                                                                                                                                                                                                                                                                                                                                                                                                                                                                                                                                                                                                                                                                                                                                                                            |         |         |         |         |         |         |         |         |          |          |          |          |          |          |          |          |          |          |          |          |          |          |          |          |          |          |          |          |          |          |          |          |          |          |          |          |          |          |          |          |          |          |          |          |          |          |          |          |          |          |          |          |          |          |          |           |           |           |           |           |           |           |           |           |           |           |           |           |           |           |           |           |           |           |           |           |           |           |           |           |           |           |           |           |           |           |           |           |           |           |           |           |           |           |           |           |           |           |           |           |           |           |           |           |           |
| 3223.3172        | 3238.4368                                                                                                                                                                                                                                                                                                                                                                                                                                                                                                                                                                                                                                                                                                                                                                                                                                                                                                                                                                                                                                                                                                                                                                                                                                                                                                                                                                                                                                                                                                                                                                                                                                                                                                                                                                                                                                                                                                                                                                                                                                                                                                                                                                                                                                                                                                                                                                                                                                                                                                                                                                                 | 3272.8299          |          |   |   |   |          |          |          |   |          |          |         |    |          |          |          |    |          |          |         |    |         |          |          |   |          |          |         |   |          |          |         |   |          |          |          |   |          |          |          |    |         |         |          |    |         |          |         |   |         |         |          |   |         |         |         |   |         |         |         |   |         |          |         |   |         |         |         |   |         |         |         |   |          |         |          |   |         |         |         |   |          |         |         |   |          |         |          |   |          |         |          |   |          |         |          |   |          |         |         |   |          |         |         |   |          |         |         |   |          |         |          |   |          |         |         |   |          |         |          |   |          |         |          |   |          |         |          |   |          |         |         |   |         |         |          |                                                                                                                                                                                                                                                                                                                                                                                                                                                                                                                                                                                                                                                                                                                                                                                                                                                                                                                                                                                                                                                                                                                                                                                                                                                                                                                                                                                                                                                                                                                                                                                                                                                                                                                                                                                                                                                                                                                                                                                                                                                                                                                                                                                                                                                                                                                                                                            |         |         |         |         |         |         |         |         |          |          |          |          |          |          |          |          |          |          |          |          |          |          |          |          |          |          |          |          |          |          |          |          |          |          |          |          |          |          |          |          |          |          |          |          |          |          |          |          |          |          |          |          |          |          |          |           |           |           |           |           |           |           |           |           |           |           |           |           |           |           |           |           |           |           |           |           |           |           |           |           |           |           |           |           |           |           |           |           |           |           |           |           |           |           |           |           |           |           |           |           |           |           |           |           |           |



|    |          |          |          |           |           |           |
|----|----------|----------|----------|-----------|-----------|-----------|
| H  | -0.54659 | -0.54710 | 2.59246  | 3277.4660 | 3288.4619 | 3295.3160 |
| H  | 1.49094  | 0.63674  | 3.27003  |           |           |           |
| H  | -0.64801 | 1.69886  | 3.44465  |           |           |           |
| Si | 0.16221  | 0.74735  | 2.65179  |           |           |           |
| Ni | 2.39053  | -0.24143 | -0.22149 |           |           |           |

**Statistical Thermodynamic Analysis**

|                                      |                                               |
|--------------------------------------|-----------------------------------------------|
| Temperature=298.15 K                 | Pressure=1 atm                                |
| Zero-point correction= 0.286531      | Electronic Energy = -2886.65372477            |
| Internal Energy (E)= -2886.34190277  | Enthalpy (H)= -2886.34095877                  |
| Gibbs Free Energy (G)=-2886.42334577 | Gibbs Free Energy of Solvation=-2886.44173929 |

| St.Pt.                                                                                                                                                                                                                                                                                                                                                                                                                                                                                                                                                                                                                                                                                                                                                                                                                                                                                                                                                                                                                                                                                                                                                                                                                                                                                                                                                                                                                                                                                                                                                                                                                                                                                                                                                                                                                                                                                                                                                                                                                                                                                                                                                                                                                                                                                                                                                                                                                                                                                                                                                                                                                                                                                                                                                                                    | General Structure                                                                 | Ball & Stick model                                                                 |          |   |   |          |          |          |   |          |          |         |    |          |          |          |    |          |          |         |    |         |          |          |   |          |          |         |   |          |          |         |   |          |          |          |   |          |          |          |    |         |         |          |    |         |          |         |   |         |         |          |   |         |         |         |   |         |         |         |   |         |          |         |   |         |         |         |   |         |         |         |   |          |         |          |   |         |         |         |   |          |         |         |   |          |         |          |   |          |         |          |   |          |         |          |   |          |         |         |   |          |         |         |   |          |         |         |   |          |         |          |   |          |         |         |   |          |         |          |   |          |         |          |   |          |         |          |   |          |         |         |                                                                                                                                                                                                                                                                                                                                                                                                                                                                                                                                                                                                                                                                                                                                                                                                                                                                                                                                                                                                                                                                                                                                                                                                                                                                                                                                                                                                                                                                                                                                                                                                                                                                                                                                                                                                                                                                                                                                                                                                                                                                                                                                                                                                                                                                                                 |           |         |         |         |         |         |         |         |          |          |          |          |          |          |          |          |          |          |          |          |          |          |          |          |          |          |          |          |          |          |          |          |          |          |          |          |          |          |          |          |          |          |          |          |          |          |          |          |          |          |          |          |          |          |          |           |           |           |           |           |           |           |           |           |           |           |           |           |           |           |           |           |           |           |           |           |           |           |           |           |           |           |           |           |           |           |           |           |           |           |           |           |           |           |           |           |           |           |           |           |           |           |
|-------------------------------------------------------------------------------------------------------------------------------------------------------------------------------------------------------------------------------------------------------------------------------------------------------------------------------------------------------------------------------------------------------------------------------------------------------------------------------------------------------------------------------------------------------------------------------------------------------------------------------------------------------------------------------------------------------------------------------------------------------------------------------------------------------------------------------------------------------------------------------------------------------------------------------------------------------------------------------------------------------------------------------------------------------------------------------------------------------------------------------------------------------------------------------------------------------------------------------------------------------------------------------------------------------------------------------------------------------------------------------------------------------------------------------------------------------------------------------------------------------------------------------------------------------------------------------------------------------------------------------------------------------------------------------------------------------------------------------------------------------------------------------------------------------------------------------------------------------------------------------------------------------------------------------------------------------------------------------------------------------------------------------------------------------------------------------------------------------------------------------------------------------------------------------------------------------------------------------------------------------------------------------------------------------------------------------------------------------------------------------------------------------------------------------------------------------------------------------------------------------------------------------------------------------------------------------------------------------------------------------------------------------------------------------------------------------------------------------------------------------------------------------------------|-----------------------------------------------------------------------------------|------------------------------------------------------------------------------------|----------|---|---|----------|----------|----------|---|----------|----------|---------|----|----------|----------|----------|----|----------|----------|---------|----|---------|----------|----------|---|----------|----------|---------|---|----------|----------|---------|---|----------|----------|----------|---|----------|----------|----------|----|---------|---------|----------|----|---------|----------|---------|---|---------|---------|----------|---|---------|---------|---------|---|---------|---------|---------|---|---------|----------|---------|---|---------|---------|---------|---|---------|---------|---------|---|----------|---------|----------|---|---------|---------|---------|---|----------|---------|---------|---|----------|---------|----------|---|----------|---------|----------|---|----------|---------|----------|---|----------|---------|---------|---|----------|---------|---------|---|----------|---------|---------|---|----------|---------|----------|---|----------|---------|---------|---|----------|---------|----------|---|----------|---------|----------|---|----------|---------|----------|---|----------|---------|---------|-------------------------------------------------------------------------------------------------------------------------------------------------------------------------------------------------------------------------------------------------------------------------------------------------------------------------------------------------------------------------------------------------------------------------------------------------------------------------------------------------------------------------------------------------------------------------------------------------------------------------------------------------------------------------------------------------------------------------------------------------------------------------------------------------------------------------------------------------------------------------------------------------------------------------------------------------------------------------------------------------------------------------------------------------------------------------------------------------------------------------------------------------------------------------------------------------------------------------------------------------------------------------------------------------------------------------------------------------------------------------------------------------------------------------------------------------------------------------------------------------------------------------------------------------------------------------------------------------------------------------------------------------------------------------------------------------------------------------------------------------------------------------------------------------------------------------------------------------------------------------------------------------------------------------------------------------------------------------------------------------------------------------------------------------------------------------------------------------------------------------------------------------------------------------------------------------------------------------------------------------------------------------------------------------|-----------|---------|---------|---------|---------|---------|---------|---------|----------|----------|----------|----------|----------|----------|----------|----------|----------|----------|----------|----------|----------|----------|----------|----------|----------|----------|----------|----------|----------|----------|----------|----------|----------|----------|----------|----------|----------|----------|----------|----------|----------|----------|----------|----------|----------|----------|----------|----------|----------|----------|----------|----------|----------|----------|----------|-----------|-----------|-----------|-----------|-----------|-----------|-----------|-----------|-----------|-----------|-----------|-----------|-----------|-----------|-----------|-----------|-----------|-----------|-----------|-----------|-----------|-----------|-----------|-----------|-----------|-----------|-----------|-----------|-----------|-----------|-----------|-----------|-----------|-----------|-----------|-----------|-----------|-----------|-----------|-----------|-----------|-----------|-----------|-----------|-----------|-----------|-----------|
| 2NiTS <sub>1</sub>                                                                                                                                                                                                                                                                                                                                                                                                                                                                                                                                                                                                                                                                                                                                                                                                                                                                                                                                                                                                                                                                                                                                                                                                                                                                                                                                                                                                                                                                                                                                                                                                                                                                                                                                                                                                                                                                                                                                                                                                                                                                                                                                                                                                                                                                                                                                                                                                                                                                                                                                                                                                                                                                                                                                                                        | 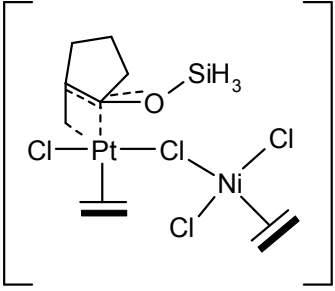 |  |          |   |   |          |          |          |   |          |          |         |    |          |          |          |    |          |          |         |    |         |          |          |   |          |          |         |   |          |          |         |   |          |          |          |   |          |          |          |    |         |         |          |    |         |          |         |   |         |         |          |   |         |         |         |   |         |         |         |   |         |          |         |   |         |         |         |   |         |         |         |   |          |         |          |   |         |         |         |   |          |         |         |   |          |         |          |   |          |         |          |   |          |         |          |   |          |         |         |   |          |         |         |   |          |         |         |   |          |         |          |   |          |         |         |   |          |         |          |   |          |         |          |   |          |         |          |   |          |         |         |                                                                                                                                                                                                                                                                                                                                                                                                                                                                                                                                                                                                                                                                                                                                                                                                                                                                                                                                                                                                                                                                                                                                                                                                                                                                                                                                                                                                                                                                                                                                                                                                                                                                                                                                                                                                                                                                                                                                                                                                                                                                                                                                                                                                                                                                                                 |           |         |         |         |         |         |         |         |          |          |          |          |          |          |          |          |          |          |          |          |          |          |          |          |          |          |          |          |          |          |          |          |          |          |          |          |          |          |          |          |          |          |          |          |          |          |          |          |          |          |          |          |          |          |          |           |           |           |           |           |           |           |           |           |           |           |           |           |           |           |           |           |           |           |           |           |           |           |           |           |           |           |           |           |           |           |           |           |           |           |           |           |           |           |           |           |           |           |           |           |           |           |
| <b><u>Cartesian co-ordinate</u></b>                                                                                                                                                                                                                                                                                                                                                                                                                                                                                                                                                                                                                                                                                                                                                                                                                                                                                                                                                                                                                                                                                                                                                                                                                                                                                                                                                                                                                                                                                                                                                                                                                                                                                                                                                                                                                                                                                                                                                                                                                                                                                                                                                                                                                                                                                                                                                                                                                                                                                                                                                                                                                                                                                                                                                       |                                                                                   | <b><u>Frequencies</u></b>                                                          |          |   |   |          |          |          |   |          |          |         |    |          |          |          |    |          |          |         |    |         |          |          |   |          |          |         |   |          |          |         |   |          |          |          |   |          |          |          |    |         |         |          |    |         |          |         |   |         |         |          |   |         |         |         |   |         |         |         |   |         |          |         |   |         |         |         |   |         |         |         |   |          |         |          |   |         |         |         |   |          |         |         |   |          |         |          |   |          |         |          |   |          |         |          |   |          |         |         |   |          |         |         |   |          |         |         |   |          |         |          |   |          |         |         |   |          |         |          |   |          |         |          |   |          |         |          |   |          |         |         |                                                                                                                                                                                                                                                                                                                                                                                                                                                                                                                                                                                                                                                                                                                                                                                                                                                                                                                                                                                                                                                                                                                                                                                                                                                                                                                                                                                                                                                                                                                                                                                                                                                                                                                                                                                                                                                                                                                                                                                                                                                                                                                                                                                                                                                                                                 |           |         |         |         |         |         |         |         |          |          |          |          |          |          |          |          |          |          |          |          |          |          |          |          |          |          |          |          |          |          |          |          |          |          |          |          |          |          |          |          |          |          |          |          |          |          |          |          |          |          |          |          |          |          |          |           |           |           |           |           |           |           |           |           |           |           |           |           |           |           |           |           |           |           |           |           |           |           |           |           |           |           |           |           |           |           |           |           |           |           |           |           |           |           |           |           |           |           |           |           |           |           |
| <table border="1" style="width: 100%; border-collapse: collapse;"> <thead> <tr> <th style="border-top: 1px dashed black; border-bottom: 1px dashed black;">Atoms</th> <th style="border-top: 1px dashed black; border-bottom: 1px dashed black;">X</th> <th style="border-top: 1px dashed black; border-bottom: 1px dashed black;">Y</th> <th style="border-top: 1px dashed black; border-bottom: 1px dashed black;">Z</th> </tr> </thead> <tbody> <tr><td>C</td><td>-1.85530</td><td>-2.91361</td><td>-0.38884</td></tr> <tr><td>C</td><td>-1.30549</td><td>-2.62591</td><td>0.84594</td></tr> <tr><td>Pt</td><td>-1.26748</td><td>-0.77760</td><td>-0.37443</td></tr> <tr><td>Cl</td><td>-3.42244</td><td>-0.24048</td><td>0.36189</td></tr> <tr><td>Cl</td><td>0.83653</td><td>-1.46720</td><td>-1.35619</td></tr> <tr><td>H</td><td>-0.25741</td><td>-2.82696</td><td>1.05700</td></tr> <tr><td>H</td><td>-1.95477</td><td>-2.39242</td><td>1.68408</td></tr> <tr><td>H</td><td>-2.93165</td><td>-2.90761</td><td>-0.52580</td></tr> <tr><td>H</td><td>-1.25302</td><td>-3.36927</td><td>-1.16857</td></tr> <tr><td>Cl</td><td>2.58843</td><td>1.18897</td><td>-1.98411</td></tr> <tr><td>Cl</td><td>2.31975</td><td>-1.62436</td><td>1.48928</td></tr> <tr><td>H</td><td>4.97169</td><td>0.50725</td><td>-0.69349</td></tr> <tr><td>C</td><td>4.57969</td><td>0.27502</td><td>0.29208</td></tr> <tr><td>C</td><td>3.77026</td><td>1.14569</td><td>0.93746</td></tr> <tr><td>H</td><td>4.88391</td><td>-0.65268</td><td>0.76782</td></tr> <tr><td>H</td><td>3.42802</td><td>0.93188</td><td>1.94490</td></tr> <tr><td>H</td><td>3.50066</td><td>2.09532</td><td>0.48615</td></tr> <tr><td>C</td><td>-0.33450</td><td>2.60333</td><td>-0.73752</td></tr> <tr><td>O</td><td>0.46292</td><td>1.33660</td><td>1.18128</td></tr> <tr><td>C</td><td>-0.52685</td><td>1.92268</td><td>0.50686</td></tr> <tr><td>C</td><td>-0.93750</td><td>1.20861</td><td>-1.21459</td></tr> <tr><td>H</td><td>-1.92229</td><td>1.39039</td><td>-1.63873</td></tr> <tr><td>H</td><td>-0.18146</td><td>0.86783</td><td>-1.92285</td></tr> <tr><td>C</td><td>-1.76908</td><td>2.44732</td><td>1.19458</td></tr> <tr><td>H</td><td>-2.38657</td><td>1.68549</td><td>1.67067</td></tr> <tr><td>C</td><td>-2.48916</td><td>3.26236</td><td>0.11521</td></tr> <tr><td>H</td><td>-3.19944</td><td>2.61793</td><td>-0.40828</td></tr> <tr><td>H</td><td>-3.04918</td><td>4.09626</td><td>0.54085</td></tr> <tr><td>C</td><td>-1.35546</td><td>3.72752</td><td>-0.82051</td></tr> <tr><td>H</td><td>-1.68820</td><td>3.90586</td><td>-1.84583</td></tr> <tr><td>H</td><td>-0.89727</td><td>4.64985</td><td>-0.44647</td></tr> <tr><td>H</td><td>-1.37015</td><td>3.11389</td><td>1.97247</td></tr> </tbody> </table> | Atoms                                                                             | X                                                                                  | Y        | Z | C | -1.85530 | -2.91361 | -0.38884 | C | -1.30549 | -2.62591 | 0.84594 | Pt | -1.26748 | -0.77760 | -0.37443 | Cl | -3.42244 | -0.24048 | 0.36189 | Cl | 0.83653 | -1.46720 | -1.35619 | H | -0.25741 | -2.82696 | 1.05700 | H | -1.95477 | -2.39242 | 1.68408 | H | -2.93165 | -2.90761 | -0.52580 | H | -1.25302 | -3.36927 | -1.16857 | Cl | 2.58843 | 1.18897 | -1.98411 | Cl | 2.31975 | -1.62436 | 1.48928 | H | 4.97169 | 0.50725 | -0.69349 | C | 4.57969 | 0.27502 | 0.29208 | C | 3.77026 | 1.14569 | 0.93746 | H | 4.88391 | -0.65268 | 0.76782 | H | 3.42802 | 0.93188 | 1.94490 | H | 3.50066 | 2.09532 | 0.48615 | C | -0.33450 | 2.60333 | -0.73752 | O | 0.46292 | 1.33660 | 1.18128 | C | -0.52685 | 1.92268 | 0.50686 | C | -0.93750 | 1.20861 | -1.21459 | H | -1.92229 | 1.39039 | -1.63873 | H | -0.18146 | 0.86783 | -1.92285 | C | -1.76908 | 2.44732 | 1.19458 | H | -2.38657 | 1.68549 | 1.67067 | C | -2.48916 | 3.26236 | 0.11521 | H | -3.19944 | 2.61793 | -0.40828 | H | -3.04918 | 4.09626 | 0.54085 | C | -1.35546 | 3.72752 | -0.82051 | H | -1.68820 | 3.90586 | -1.84583 | H | -0.89727 | 4.64985 | -0.44647 | H | -1.37015 | 3.11389 | 1.97247 | <table border="1" style="width: 100%; border-collapse: collapse;"> <tbody> <tr><td>-255.7367</td><td>28.7838</td><td>38.2555</td></tr> <tr><td>64.1081</td><td>71.2572</td><td>86.3613</td></tr> <tr><td>88.2885</td><td>94.2271</td><td>106.7020</td></tr> <tr><td>117.7413</td><td>125.7429</td><td>136.5597</td></tr> <tr><td>146.1214</td><td>157.4859</td><td>159.8912</td></tr> <tr><td>176.1667</td><td>187.0893</td><td>191.2638</td></tr> <tr><td>194.5001</td><td>206.7287</td><td>208.4639</td></tr> <tr><td>238.3733</td><td>249.0007</td><td>268.3628</td></tr> <tr><td>291.6910</td><td>296.3583</td><td>302.3637</td></tr> <tr><td>307.9471</td><td>311.4686</td><td>318.1956</td></tr> <tr><td>324.7650</td><td>337.9455</td><td>374.8475</td></tr> <tr><td>380.4506</td><td>419.4601</td><td>456.4855</td></tr> <tr><td>458.3709</td><td>492.9622</td><td>542.7891</td></tr> <tr><td>630.4032</td><td>696.4276</td><td>702.2962</td></tr> <tr><td>725.3534</td><td>756.9996</td><td>773.0830</td></tr> <tr><td>799.7544</td><td>817.6304</td><td>838.3438</td></tr> <tr><td>840.5522</td><td>889.5771</td><td>912.2144</td></tr> <tr><td>933.1444</td><td>939.1907</td><td>977.5562</td></tr> <tr><td>994.7027</td><td>1004.9527</td><td>1040.0517</td></tr> <tr><td>1044.3435</td><td>1048.5731</td><td>1051.5497</td></tr> <tr><td>1056.3502</td><td>1058.1606</td><td>1062.6235</td></tr> <tr><td>1067.4453</td><td>1122.7167</td><td>1131.2440</td></tr> <tr><td>1167.7354</td><td>1191.2222</td><td>1231.2797</td></tr> <tr><td>1233.7731</td><td>1235.1049</td><td>1259.4714</td></tr> <tr><td>1290.3170</td><td>1303.3819</td><td>1325.6434</td></tr> <tr><td>1339.0310</td><td>1344.9300</td><td>1366.4521</td></tr> <tr><td>1383.7494</td><td>1393.3622</td><td>1455.1768</td></tr> <tr><td>1463.2623</td><td>1473.0226</td><td>1502.2272</td></tr> <tr><td>1522.1700</td><td>1551.3769</td><td>1603.4351</td></tr> <tr><td>1653.1635</td><td>2275.0332</td><td>2334.4920</td></tr> <tr><td>2363.6460</td><td>3060.3886</td><td>3085.4588</td></tr> <tr><td>3110.8426</td><td>3116.8067</td><td>3146.0831</td></tr> <tr><td>3166.8677</td><td>3174.0620</td><td>3179.0022</td></tr> <tr><td>3179.1355</td><td>3179.5601</td><td>3185.5557</td></tr> </tbody> </table> | -255.7367 | 28.7838 | 38.2555 | 64.1081 | 71.2572 | 86.3613 | 88.2885 | 94.2271 | 106.7020 | 117.7413 | 125.7429 | 136.5597 | 146.1214 | 157.4859 | 159.8912 | 176.1667 | 187.0893 | 191.2638 | 194.5001 | 206.7287 | 208.4639 | 238.3733 | 249.0007 | 268.3628 | 291.6910 | 296.3583 | 302.3637 | 307.9471 | 311.4686 | 318.1956 | 324.7650 | 337.9455 | 374.8475 | 380.4506 | 419.4601 | 456.4855 | 458.3709 | 492.9622 | 542.7891 | 630.4032 | 696.4276 | 702.2962 | 725.3534 | 756.9996 | 773.0830 | 799.7544 | 817.6304 | 838.3438 | 840.5522 | 889.5771 | 912.2144 | 933.1444 | 939.1907 | 977.5562 | 994.7027 | 1004.9527 | 1040.0517 | 1044.3435 | 1048.5731 | 1051.5497 | 1056.3502 | 1058.1606 | 1062.6235 | 1067.4453 | 1122.7167 | 1131.2440 | 1167.7354 | 1191.2222 | 1231.2797 | 1233.7731 | 1235.1049 | 1259.4714 | 1290.3170 | 1303.3819 | 1325.6434 | 1339.0310 | 1344.9300 | 1366.4521 | 1383.7494 | 1393.3622 | 1455.1768 | 1463.2623 | 1473.0226 | 1502.2272 | 1522.1700 | 1551.3769 | 1603.4351 | 1653.1635 | 2275.0332 | 2334.4920 | 2363.6460 | 3060.3886 | 3085.4588 | 3110.8426 | 3116.8067 | 3146.0831 | 3166.8677 | 3174.0620 | 3179.0022 | 3179.1355 | 3179.5601 | 3185.5557 |
| Atoms                                                                                                                                                                                                                                                                                                                                                                                                                                                                                                                                                                                                                                                                                                                                                                                                                                                                                                                                                                                                                                                                                                                                                                                                                                                                                                                                                                                                                                                                                                                                                                                                                                                                                                                                                                                                                                                                                                                                                                                                                                                                                                                                                                                                                                                                                                                                                                                                                                                                                                                                                                                                                                                                                                                                                                                     | X                                                                                 | Y                                                                                  | Z        |   |   |          |          |          |   |          |          |         |    |          |          |          |    |          |          |         |    |         |          |          |   |          |          |         |   |          |          |         |   |          |          |          |   |          |          |          |    |         |         |          |    |         |          |         |   |         |         |          |   |         |         |         |   |         |         |         |   |         |          |         |   |         |         |         |   |         |         |         |   |          |         |          |   |         |         |         |   |          |         |         |   |          |         |          |   |          |         |          |   |          |         |          |   |          |         |         |   |          |         |         |   |          |         |         |   |          |         |          |   |          |         |         |   |          |         |          |   |          |         |          |   |          |         |          |   |          |         |         |                                                                                                                                                                                                                                                                                                                                                                                                                                                                                                                                                                                                                                                                                                                                                                                                                                                                                                                                                                                                                                                                                                                                                                                                                                                                                                                                                                                                                                                                                                                                                                                                                                                                                                                                                                                                                                                                                                                                                                                                                                                                                                                                                                                                                                                                                                 |           |         |         |         |         |         |         |         |          |          |          |          |          |          |          |          |          |          |          |          |          |          |          |          |          |          |          |          |          |          |          |          |          |          |          |          |          |          |          |          |          |          |          |          |          |          |          |          |          |          |          |          |          |          |          |           |           |           |           |           |           |           |           |           |           |           |           |           |           |           |           |           |           |           |           |           |           |           |           |           |           |           |           |           |           |           |           |           |           |           |           |           |           |           |           |           |           |           |           |           |           |           |
| C                                                                                                                                                                                                                                                                                                                                                                                                                                                                                                                                                                                                                                                                                                                                                                                                                                                                                                                                                                                                                                                                                                                                                                                                                                                                                                                                                                                                                                                                                                                                                                                                                                                                                                                                                                                                                                                                                                                                                                                                                                                                                                                                                                                                                                                                                                                                                                                                                                                                                                                                                                                                                                                                                                                                                                                         | -1.85530                                                                          | -2.91361                                                                           | -0.38884 |   |   |          |          |          |   |          |          |         |    |          |          |          |    |          |          |         |    |         |          |          |   |          |          |         |   |          |          |         |   |          |          |          |   |          |          |          |    |         |         |          |    |         |          |         |   |         |         |          |   |         |         |         |   |         |         |         |   |         |          |         |   |         |         |         |   |         |         |         |   |          |         |          |   |         |         |         |   |          |         |         |   |          |         |          |   |          |         |          |   |          |         |          |   |          |         |         |   |          |         |         |   |          |         |         |   |          |         |          |   |          |         |         |   |          |         |          |   |          |         |          |   |          |         |          |   |          |         |         |                                                                                                                                                                                                                                                                                                                                                                                                                                                                                                                                                                                                                                                                                                                                                                                                                                                                                                                                                                                                                                                                                                                                                                                                                                                                                                                                                                                                                                                                                                                                                                                                                                                                                                                                                                                                                                                                                                                                                                                                                                                                                                                                                                                                                                                                                                 |           |         |         |         |         |         |         |         |          |          |          |          |          |          |          |          |          |          |          |          |          |          |          |          |          |          |          |          |          |          |          |          |          |          |          |          |          |          |          |          |          |          |          |          |          |          |          |          |          |          |          |          |          |          |          |           |           |           |           |           |           |           |           |           |           |           |           |           |           |           |           |           |           |           |           |           |           |           |           |           |           |           |           |           |           |           |           |           |           |           |           |           |           |           |           |           |           |           |           |           |           |           |
| C                                                                                                                                                                                                                                                                                                                                                                                                                                                                                                                                                                                                                                                                                                                                                                                                                                                                                                                                                                                                                                                                                                                                                                                                                                                                                                                                                                                                                                                                                                                                                                                                                                                                                                                                                                                                                                                                                                                                                                                                                                                                                                                                                                                                                                                                                                                                                                                                                                                                                                                                                                                                                                                                                                                                                                                         | -1.30549                                                                          | -2.62591                                                                           | 0.84594  |   |   |          |          |          |   |          |          |         |    |          |          |          |    |          |          |         |    |         |          |          |   |          |          |         |   |          |          |         |   |          |          |          |   |          |          |          |    |         |         |          |    |         |          |         |   |         |         |          |   |         |         |         |   |         |         |         |   |         |          |         |   |         |         |         |   |         |         |         |   |          |         |          |   |         |         |         |   |          |         |         |   |          |         |          |   |          |         |          |   |          |         |          |   |          |         |         |   |          |         |         |   |          |         |         |   |          |         |          |   |          |         |         |   |          |         |          |   |          |         |          |   |          |         |          |   |          |         |         |                                                                                                                                                                                                                                                                                                                                                                                                                                                                                                                                                                                                                                                                                                                                                                                                                                                                                                                                                                                                                                                                                                                                                                                                                                                                                                                                                                                                                                                                                                                                                                                                                                                                                                                                                                                                                                                                                                                                                                                                                                                                                                                                                                                                                                                                                                 |           |         |         |         |         |         |         |         |          |          |          |          |          |          |          |          |          |          |          |          |          |          |          |          |          |          |          |          |          |          |          |          |          |          |          |          |          |          |          |          |          |          |          |          |          |          |          |          |          |          |          |          |          |          |          |           |           |           |           |           |           |           |           |           |           |           |           |           |           |           |           |           |           |           |           |           |           |           |           |           |           |           |           |           |           |           |           |           |           |           |           |           |           |           |           |           |           |           |           |           |           |           |
| Pt                                                                                                                                                                                                                                                                                                                                                                                                                                                                                                                                                                                                                                                                                                                                                                                                                                                                                                                                                                                                                                                                                                                                                                                                                                                                                                                                                                                                                                                                                                                                                                                                                                                                                                                                                                                                                                                                                                                                                                                                                                                                                                                                                                                                                                                                                                                                                                                                                                                                                                                                                                                                                                                                                                                                                                                        | -1.26748                                                                          | -0.77760                                                                           | -0.37443 |   |   |          |          |          |   |          |          |         |    |          |          |          |    |          |          |         |    |         |          |          |   |          |          |         |   |          |          |         |   |          |          |          |   |          |          |          |    |         |         |          |    |         |          |         |   |         |         |          |   |         |         |         |   |         |         |         |   |         |          |         |   |         |         |         |   |         |         |         |   |          |         |          |   |         |         |         |   |          |         |         |   |          |         |          |   |          |         |          |   |          |         |          |   |          |         |         |   |          |         |         |   |          |         |         |   |          |         |          |   |          |         |         |   |          |         |          |   |          |         |          |   |          |         |          |   |          |         |         |                                                                                                                                                                                                                                                                                                                                                                                                                                                                                                                                                                                                                                                                                                                                                                                                                                                                                                                                                                                                                                                                                                                                                                                                                                                                                                                                                                                                                                                                                                                                                                                                                                                                                                                                                                                                                                                                                                                                                                                                                                                                                                                                                                                                                                                                                                 |           |         |         |         |         |         |         |         |          |          |          |          |          |          |          |          |          |          |          |          |          |          |          |          |          |          |          |          |          |          |          |          |          |          |          |          |          |          |          |          |          |          |          |          |          |          |          |          |          |          |          |          |          |          |          |           |           |           |           |           |           |           |           |           |           |           |           |           |           |           |           |           |           |           |           |           |           |           |           |           |           |           |           |           |           |           |           |           |           |           |           |           |           |           |           |           |           |           |           |           |           |           |
| Cl                                                                                                                                                                                                                                                                                                                                                                                                                                                                                                                                                                                                                                                                                                                                                                                                                                                                                                                                                                                                                                                                                                                                                                                                                                                                                                                                                                                                                                                                                                                                                                                                                                                                                                                                                                                                                                                                                                                                                                                                                                                                                                                                                                                                                                                                                                                                                                                                                                                                                                                                                                                                                                                                                                                                                                                        | -3.42244                                                                          | -0.24048                                                                           | 0.36189  |   |   |          |          |          |   |          |          |         |    |          |          |          |    |          |          |         |    |         |          |          |   |          |          |         |   |          |          |         |   |          |          |          |   |          |          |          |    |         |         |          |    |         |          |         |   |         |         |          |   |         |         |         |   |         |         |         |   |         |          |         |   |         |         |         |   |         |         |         |   |          |         |          |   |         |         |         |   |          |         |         |   |          |         |          |   |          |         |          |   |          |         |          |   |          |         |         |   |          |         |         |   |          |         |         |   |          |         |          |   |          |         |         |   |          |         |          |   |          |         |          |   |          |         |          |   |          |         |         |                                                                                                                                                                                                                                                                                                                                                                                                                                                                                                                                                                                                                                                                                                                                                                                                                                                                                                                                                                                                                                                                                                                                                                                                                                                                                                                                                                                                                                                                                                                                                                                                                                                                                                                                                                                                                                                                                                                                                                                                                                                                                                                                                                                                                                                                                                 |           |         |         |         |         |         |         |         |          |          |          |          |          |          |          |          |          |          |          |          |          |          |          |          |          |          |          |          |          |          |          |          |          |          |          |          |          |          |          |          |          |          |          |          |          |          |          |          |          |          |          |          |          |          |          |           |           |           |           |           |           |           |           |           |           |           |           |           |           |           |           |           |           |           |           |           |           |           |           |           |           |           |           |           |           |           |           |           |           |           |           |           |           |           |           |           |           |           |           |           |           |           |
| Cl                                                                                                                                                                                                                                                                                                                                                                                                                                                                                                                                                                                                                                                                                                                                                                                                                                                                                                                                                                                                                                                                                                                                                                                                                                                                                                                                                                                                                                                                                                                                                                                                                                                                                                                                                                                                                                                                                                                                                                                                                                                                                                                                                                                                                                                                                                                                                                                                                                                                                                                                                                                                                                                                                                                                                                                        | 0.83653                                                                           | -1.46720                                                                           | -1.35619 |   |   |          |          |          |   |          |          |         |    |          |          |          |    |          |          |         |    |         |          |          |   |          |          |         |   |          |          |         |   |          |          |          |   |          |          |          |    |         |         |          |    |         |          |         |   |         |         |          |   |         |         |         |   |         |         |         |   |         |          |         |   |         |         |         |   |         |         |         |   |          |         |          |   |         |         |         |   |          |         |         |   |          |         |          |   |          |         |          |   |          |         |          |   |          |         |         |   |          |         |         |   |          |         |         |   |          |         |          |   |          |         |         |   |          |         |          |   |          |         |          |   |          |         |          |   |          |         |         |                                                                                                                                                                                                                                                                                                                                                                                                                                                                                                                                                                                                                                                                                                                                                                                                                                                                                                                                                                                                                                                                                                                                                                                                                                                                                                                                                                                                                                                                                                                                                                                                                                                                                                                                                                                                                                                                                                                                                                                                                                                                                                                                                                                                                                                                                                 |           |         |         |         |         |         |         |         |          |          |          |          |          |          |          |          |          |          |          |          |          |          |          |          |          |          |          |          |          |          |          |          |          |          |          |          |          |          |          |          |          |          |          |          |          |          |          |          |          |          |          |          |          |          |          |           |           |           |           |           |           |           |           |           |           |           |           |           |           |           |           |           |           |           |           |           |           |           |           |           |           |           |           |           |           |           |           |           |           |           |           |           |           |           |           |           |           |           |           |           |           |           |
| H                                                                                                                                                                                                                                                                                                                                                                                                                                                                                                                                                                                                                                                                                                                                                                                                                                                                                                                                                                                                                                                                                                                                                                                                                                                                                                                                                                                                                                                                                                                                                                                                                                                                                                                                                                                                                                                                                                                                                                                                                                                                                                                                                                                                                                                                                                                                                                                                                                                                                                                                                                                                                                                                                                                                                                                         | -0.25741                                                                          | -2.82696                                                                           | 1.05700  |   |   |          |          |          |   |          |          |         |    |          |          |          |    |          |          |         |    |         |          |          |   |          |          |         |   |          |          |         |   |          |          |          |   |          |          |          |    |         |         |          |    |         |          |         |   |         |         |          |   |         |         |         |   |         |         |         |   |         |          |         |   |         |         |         |   |         |         |         |   |          |         |          |   |         |         |         |   |          |         |         |   |          |         |          |   |          |         |          |   |          |         |          |   |          |         |         |   |          |         |         |   |          |         |         |   |          |         |          |   |          |         |         |   |          |         |          |   |          |         |          |   |          |         |          |   |          |         |         |                                                                                                                                                                                                                                                                                                                                                                                                                                                                                                                                                                                                                                                                                                                                                                                                                                                                                                                                                                                                                                                                                                                                                                                                                                                                                                                                                                                                                                                                                                                                                                                                                                                                                                                                                                                                                                                                                                                                                                                                                                                                                                                                                                                                                                                                                                 |           |         |         |         |         |         |         |         |          |          |          |          |          |          |          |          |          |          |          |          |          |          |          |          |          |          |          |          |          |          |          |          |          |          |          |          |          |          |          |          |          |          |          |          |          |          |          |          |          |          |          |          |          |          |          |           |           |           |           |           |           |           |           |           |           |           |           |           |           |           |           |           |           |           |           |           |           |           |           |           |           |           |           |           |           |           |           |           |           |           |           |           |           |           |           |           |           |           |           |           |           |           |
| H                                                                                                                                                                                                                                                                                                                                                                                                                                                                                                                                                                                                                                                                                                                                                                                                                                                                                                                                                                                                                                                                                                                                                                                                                                                                                                                                                                                                                                                                                                                                                                                                                                                                                                                                                                                                                                                                                                                                                                                                                                                                                                                                                                                                                                                                                                                                                                                                                                                                                                                                                                                                                                                                                                                                                                                         | -1.95477                                                                          | -2.39242                                                                           | 1.68408  |   |   |          |          |          |   |          |          |         |    |          |          |          |    |          |          |         |    |         |          |          |   |          |          |         |   |          |          |         |   |          |          |          |   |          |          |          |    |         |         |          |    |         |          |         |   |         |         |          |   |         |         |         |   |         |         |         |   |         |          |         |   |         |         |         |   |         |         |         |   |          |         |          |   |         |         |         |   |          |         |         |   |          |         |          |   |          |         |          |   |          |         |          |   |          |         |         |   |          |         |         |   |          |         |         |   |          |         |          |   |          |         |         |   |          |         |          |   |          |         |          |   |          |         |          |   |          |         |         |                                                                                                                                                                                                                                                                                                                                                                                                                                                                                                                                                                                                                                                                                                                                                                                                                                                                                                                                                                                                                                                                                                                                                                                                                                                                                                                                                                                                                                                                                                                                                                                                                                                                                                                                                                                                                                                                                                                                                                                                                                                                                                                                                                                                                                                                                                 |           |         |         |         |         |         |         |         |          |          |          |          |          |          |          |          |          |          |          |          |          |          |          |          |          |          |          |          |          |          |          |          |          |          |          |          |          |          |          |          |          |          |          |          |          |          |          |          |          |          |          |          |          |          |          |           |           |           |           |           |           |           |           |           |           |           |           |           |           |           |           |           |           |           |           |           |           |           |           |           |           |           |           |           |           |           |           |           |           |           |           |           |           |           |           |           |           |           |           |           |           |           |
| H                                                                                                                                                                                                                                                                                                                                                                                                                                                                                                                                                                                                                                                                                                                                                                                                                                                                                                                                                                                                                                                                                                                                                                                                                                                                                                                                                                                                                                                                                                                                                                                                                                                                                                                                                                                                                                                                                                                                                                                                                                                                                                                                                                                                                                                                                                                                                                                                                                                                                                                                                                                                                                                                                                                                                                                         | -2.93165                                                                          | -2.90761                                                                           | -0.52580 |   |   |          |          |          |   |          |          |         |    |          |          |          |    |          |          |         |    |         |          |          |   |          |          |         |   |          |          |         |   |          |          |          |   |          |          |          |    |         |         |          |    |         |          |         |   |         |         |          |   |         |         |         |   |         |         |         |   |         |          |         |   |         |         |         |   |         |         |         |   |          |         |          |   |         |         |         |   |          |         |         |   |          |         |          |   |          |         |          |   |          |         |          |   |          |         |         |   |          |         |         |   |          |         |         |   |          |         |          |   |          |         |         |   |          |         |          |   |          |         |          |   |          |         |          |   |          |         |         |                                                                                                                                                                                                                                                                                                                                                                                                                                                                                                                                                                                                                                                                                                                                                                                                                                                                                                                                                                                                                                                                                                                                                                                                                                                                                                                                                                                                                                                                                                                                                                                                                                                                                                                                                                                                                                                                                                                                                                                                                                                                                                                                                                                                                                                                                                 |           |         |         |         |         |         |         |         |          |          |          |          |          |          |          |          |          |          |          |          |          |          |          |          |          |          |          |          |          |          |          |          |          |          |          |          |          |          |          |          |          |          |          |          |          |          |          |          |          |          |          |          |          |          |          |           |           |           |           |           |           |           |           |           |           |           |           |           |           |           |           |           |           |           |           |           |           |           |           |           |           |           |           |           |           |           |           |           |           |           |           |           |           |           |           |           |           |           |           |           |           |           |
| H                                                                                                                                                                                                                                                                                                                                                                                                                                                                                                                                                                                                                                                                                                                                                                                                                                                                                                                                                                                                                                                                                                                                                                                                                                                                                                                                                                                                                                                                                                                                                                                                                                                                                                                                                                                                                                                                                                                                                                                                                                                                                                                                                                                                                                                                                                                                                                                                                                                                                                                                                                                                                                                                                                                                                                                         | -1.25302                                                                          | -3.36927                                                                           | -1.16857 |   |   |          |          |          |   |          |          |         |    |          |          |          |    |          |          |         |    |         |          |          |   |          |          |         |   |          |          |         |   |          |          |          |   |          |          |          |    |         |         |          |    |         |          |         |   |         |         |          |   |         |         |         |   |         |         |         |   |         |          |         |   |         |         |         |   |         |         |         |   |          |         |          |   |         |         |         |   |          |         |         |   |          |         |          |   |          |         |          |   |          |         |          |   |          |         |         |   |          |         |         |   |          |         |         |   |          |         |          |   |          |         |         |   |          |         |          |   |          |         |          |   |          |         |          |   |          |         |         |                                                                                                                                                                                                                                                                                                                                                                                                                                                                                                                                                                                                                                                                                                                                                                                                                                                                                                                                                                                                                                                                                                                                                                                                                                                                                                                                                                                                                                                                                                                                                                                                                                                                                                                                                                                                                                                                                                                                                                                                                                                                                                                                                                                                                                                                                                 |           |         |         |         |         |         |         |         |          |          |          |          |          |          |          |          |          |          |          |          |          |          |          |          |          |          |          |          |          |          |          |          |          |          |          |          |          |          |          |          |          |          |          |          |          |          |          |          |          |          |          |          |          |          |          |           |           |           |           |           |           |           |           |           |           |           |           |           |           |           |           |           |           |           |           |           |           |           |           |           |           |           |           |           |           |           |           |           |           |           |           |           |           |           |           |           |           |           |           |           |           |           |
| Cl                                                                                                                                                                                                                                                                                                                                                                                                                                                                                                                                                                                                                                                                                                                                                                                                                                                                                                                                                                                                                                                                                                                                                                                                                                                                                                                                                                                                                                                                                                                                                                                                                                                                                                                                                                                                                                                                                                                                                                                                                                                                                                                                                                                                                                                                                                                                                                                                                                                                                                                                                                                                                                                                                                                                                                                        | 2.58843                                                                           | 1.18897                                                                            | -1.98411 |   |   |          |          |          |   |          |          |         |    |          |          |          |    |          |          |         |    |         |          |          |   |          |          |         |   |          |          |         |   |          |          |          |   |          |          |          |    |         |         |          |    |         |          |         |   |         |         |          |   |         |         |         |   |         |         |         |   |         |          |         |   |         |         |         |   |         |         |         |   |          |         |          |   |         |         |         |   |          |         |         |   |          |         |          |   |          |         |          |   |          |         |          |   |          |         |         |   |          |         |         |   |          |         |         |   |          |         |          |   |          |         |         |   |          |         |          |   |          |         |          |   |          |         |          |   |          |         |         |                                                                                                                                                                                                                                                                                                                                                                                                                                                                                                                                                                                                                                                                                                                                                                                                                                                                                                                                                                                                                                                                                                                                                                                                                                                                                                                                                                                                                                                                                                                                                                                                                                                                                                                                                                                                                                                                                                                                                                                                                                                                                                                                                                                                                                                                                                 |           |         |         |         |         |         |         |         |          |          |          |          |          |          |          |          |          |          |          |          |          |          |          |          |          |          |          |          |          |          |          |          |          |          |          |          |          |          |          |          |          |          |          |          |          |          |          |          |          |          |          |          |          |          |          |           |           |           |           |           |           |           |           |           |           |           |           |           |           |           |           |           |           |           |           |           |           |           |           |           |           |           |           |           |           |           |           |           |           |           |           |           |           |           |           |           |           |           |           |           |           |           |
| Cl                                                                                                                                                                                                                                                                                                                                                                                                                                                                                                                                                                                                                                                                                                                                                                                                                                                                                                                                                                                                                                                                                                                                                                                                                                                                                                                                                                                                                                                                                                                                                                                                                                                                                                                                                                                                                                                                                                                                                                                                                                                                                                                                                                                                                                                                                                                                                                                                                                                                                                                                                                                                                                                                                                                                                                                        | 2.31975                                                                           | -1.62436                                                                           | 1.48928  |   |   |          |          |          |   |          |          |         |    |          |          |          |    |          |          |         |    |         |          |          |   |          |          |         |   |          |          |         |   |          |          |          |   |          |          |          |    |         |         |          |    |         |          |         |   |         |         |          |   |         |         |         |   |         |         |         |   |         |          |         |   |         |         |         |   |         |         |         |   |          |         |          |   |         |         |         |   |          |         |         |   |          |         |          |   |          |         |          |   |          |         |          |   |          |         |         |   |          |         |         |   |          |         |         |   |          |         |          |   |          |         |         |   |          |         |          |   |          |         |          |   |          |         |          |   |          |         |         |                                                                                                                                                                                                                                                                                                                                                                                                                                                                                                                                                                                                                                                                                                                                                                                                                                                                                                                                                                                                                                                                                                                                                                                                                                                                                                                                                                                                                                                                                                                                                                                                                                                                                                                                                                                                                                                                                                                                                                                                                                                                                                                                                                                                                                                                                                 |           |         |         |         |         |         |         |         |          |          |          |          |          |          |          |          |          |          |          |          |          |          |          |          |          |          |          |          |          |          |          |          |          |          |          |          |          |          |          |          |          |          |          |          |          |          |          |          |          |          |          |          |          |          |          |           |           |           |           |           |           |           |           |           |           |           |           |           |           |           |           |           |           |           |           |           |           |           |           |           |           |           |           |           |           |           |           |           |           |           |           |           |           |           |           |           |           |           |           |           |           |           |
| H                                                                                                                                                                                                                                                                                                                                                                                                                                                                                                                                                                                                                                                                                                                                                                                                                                                                                                                                                                                                                                                                                                                                                                                                                                                                                                                                                                                                                                                                                                                                                                                                                                                                                                                                                                                                                                                                                                                                                                                                                                                                                                                                                                                                                                                                                                                                                                                                                                                                                                                                                                                                                                                                                                                                                                                         | 4.97169                                                                           | 0.50725                                                                            | -0.69349 |   |   |          |          |          |   |          |          |         |    |          |          |          |    |          |          |         |    |         |          |          |   |          |          |         |   |          |          |         |   |          |          |          |   |          |          |          |    |         |         |          |    |         |          |         |   |         |         |          |   |         |         |         |   |         |         |         |   |         |          |         |   |         |         |         |   |         |         |         |   |          |         |          |   |         |         |         |   |          |         |         |   |          |         |          |   |          |         |          |   |          |         |          |   |          |         |         |   |          |         |         |   |          |         |         |   |          |         |          |   |          |         |         |   |          |         |          |   |          |         |          |   |          |         |          |   |          |         |         |                                                                                                                                                                                                                                                                                                                                                                                                                                                                                                                                                                                                                                                                                                                                                                                                                                                                                                                                                                                                                                                                                                                                                                                                                                                                                                                                                                                                                                                                                                                                                                                                                                                                                                                                                                                                                                                                                                                                                                                                                                                                                                                                                                                                                                                                                                 |           |         |         |         |         |         |         |         |          |          |          |          |          |          |          |          |          |          |          |          |          |          |          |          |          |          |          |          |          |          |          |          |          |          |          |          |          |          |          |          |          |          |          |          |          |          |          |          |          |          |          |          |          |          |          |           |           |           |           |           |           |           |           |           |           |           |           |           |           |           |           |           |           |           |           |           |           |           |           |           |           |           |           |           |           |           |           |           |           |           |           |           |           |           |           |           |           |           |           |           |           |           |
| C                                                                                                                                                                                                                                                                                                                                                                                                                                                                                                                                                                                                                                                                                                                                                                                                                                                                                                                                                                                                                                                                                                                                                                                                                                                                                                                                                                                                                                                                                                                                                                                                                                                                                                                                                                                                                                                                                                                                                                                                                                                                                                                                                                                                                                                                                                                                                                                                                                                                                                                                                                                                                                                                                                                                                                                         | 4.57969                                                                           | 0.27502                                                                            | 0.29208  |   |   |          |          |          |   |          |          |         |    |          |          |          |    |          |          |         |    |         |          |          |   |          |          |         |   |          |          |         |   |          |          |          |   |          |          |          |    |         |         |          |    |         |          |         |   |         |         |          |   |         |         |         |   |         |         |         |   |         |          |         |   |         |         |         |   |         |         |         |   |          |         |          |   |         |         |         |   |          |         |         |   |          |         |          |   |          |         |          |   |          |         |          |   |          |         |         |   |          |         |         |   |          |         |         |   |          |         |          |   |          |         |         |   |          |         |          |   |          |         |          |   |          |         |          |   |          |         |         |                                                                                                                                                                                                                                                                                                                                                                                                                                                                                                                                                                                                                                                                                                                                                                                                                                                                                                                                                                                                                                                                                                                                                                                                                                                                                                                                                                                                                                                                                                                                                                                                                                                                                                                                                                                                                                                                                                                                                                                                                                                                                                                                                                                                                                                                                                 |           |         |         |         |         |         |         |         |          |          |          |          |          |          |          |          |          |          |          |          |          |          |          |          |          |          |          |          |          |          |          |          |          |          |          |          |          |          |          |          |          |          |          |          |          |          |          |          |          |          |          |          |          |          |          |           |           |           |           |           |           |           |           |           |           |           |           |           |           |           |           |           |           |           |           |           |           |           |           |           |           |           |           |           |           |           |           |           |           |           |           |           |           |           |           |           |           |           |           |           |           |           |
| C                                                                                                                                                                                                                                                                                                                                                                                                                                                                                                                                                                                                                                                                                                                                                                                                                                                                                                                                                                                                                                                                                                                                                                                                                                                                                                                                                                                                                                                                                                                                                                                                                                                                                                                                                                                                                                                                                                                                                                                                                                                                                                                                                                                                                                                                                                                                                                                                                                                                                                                                                                                                                                                                                                                                                                                         | 3.77026                                                                           | 1.14569                                                                            | 0.93746  |   |   |          |          |          |   |          |          |         |    |          |          |          |    |          |          |         |    |         |          |          |   |          |          |         |   |          |          |         |   |          |          |          |   |          |          |          |    |         |         |          |    |         |          |         |   |         |         |          |   |         |         |         |   |         |         |         |   |         |          |         |   |         |         |         |   |         |         |         |   |          |         |          |   |         |         |         |   |          |         |         |   |          |         |          |   |          |         |          |   |          |         |          |   |          |         |         |   |          |         |         |   |          |         |         |   |          |         |          |   |          |         |         |   |          |         |          |   |          |         |          |   |          |         |          |   |          |         |         |                                                                                                                                                                                                                                                                                                                                                                                                                                                                                                                                                                                                                                                                                                                                                                                                                                                                                                                                                                                                                                                                                                                                                                                                                                                                                                                                                                                                                                                                                                                                                                                                                                                                                                                                                                                                                                                                                                                                                                                                                                                                                                                                                                                                                                                                                                 |           |         |         |         |         |         |         |         |          |          |          |          |          |          |          |          |          |          |          |          |          |          |          |          |          |          |          |          |          |          |          |          |          |          |          |          |          |          |          |          |          |          |          |          |          |          |          |          |          |          |          |          |          |          |          |           |           |           |           |           |           |           |           |           |           |           |           |           |           |           |           |           |           |           |           |           |           |           |           |           |           |           |           |           |           |           |           |           |           |           |           |           |           |           |           |           |           |           |           |           |           |           |
| H                                                                                                                                                                                                                                                                                                                                                                                                                                                                                                                                                                                                                                                                                                                                                                                                                                                                                                                                                                                                                                                                                                                                                                                                                                                                                                                                                                                                                                                                                                                                                                                                                                                                                                                                                                                                                                                                                                                                                                                                                                                                                                                                                                                                                                                                                                                                                                                                                                                                                                                                                                                                                                                                                                                                                                                         | 4.88391                                                                           | -0.65268                                                                           | 0.76782  |   |   |          |          |          |   |          |          |         |    |          |          |          |    |          |          |         |    |         |          |          |   |          |          |         |   |          |          |         |   |          |          |          |   |          |          |          |    |         |         |          |    |         |          |         |   |         |         |          |   |         |         |         |   |         |         |         |   |         |          |         |   |         |         |         |   |         |         |         |   |          |         |          |   |         |         |         |   |          |         |         |   |          |         |          |   |          |         |          |   |          |         |          |   |          |         |         |   |          |         |         |   |          |         |         |   |          |         |          |   |          |         |         |   |          |         |          |   |          |         |          |   |          |         |          |   |          |         |         |                                                                                                                                                                                                                                                                                                                                                                                                                                                                                                                                                                                                                                                                                                                                                                                                                                                                                                                                                                                                                                                                                                                                                                                                                                                                                                                                                                                                                                                                                                                                                                                                                                                                                                                                                                                                                                                                                                                                                                                                                                                                                                                                                                                                                                                                                                 |           |         |         |         |         |         |         |         |          |          |          |          |          |          |          |          |          |          |          |          |          |          |          |          |          |          |          |          |          |          |          |          |          |          |          |          |          |          |          |          |          |          |          |          |          |          |          |          |          |          |          |          |          |          |          |           |           |           |           |           |           |           |           |           |           |           |           |           |           |           |           |           |           |           |           |           |           |           |           |           |           |           |           |           |           |           |           |           |           |           |           |           |           |           |           |           |           |           |           |           |           |           |
| H                                                                                                                                                                                                                                                                                                                                                                                                                                                                                                                                                                                                                                                                                                                                                                                                                                                                                                                                                                                                                                                                                                                                                                                                                                                                                                                                                                                                                                                                                                                                                                                                                                                                                                                                                                                                                                                                                                                                                                                                                                                                                                                                                                                                                                                                                                                                                                                                                                                                                                                                                                                                                                                                                                                                                                                         | 3.42802                                                                           | 0.93188                                                                            | 1.94490  |   |   |          |          |          |   |          |          |         |    |          |          |          |    |          |          |         |    |         |          |          |   |          |          |         |   |          |          |         |   |          |          |          |   |          |          |          |    |         |         |          |    |         |          |         |   |         |         |          |   |         |         |         |   |         |         |         |   |         |          |         |   |         |         |         |   |         |         |         |   |          |         |          |   |         |         |         |   |          |         |         |   |          |         |          |   |          |         |          |   |          |         |          |   |          |         |         |   |          |         |         |   |          |         |         |   |          |         |          |   |          |         |         |   |          |         |          |   |          |         |          |   |          |         |          |   |          |         |         |                                                                                                                                                                                                                                                                                                                                                                                                                                                                                                                                                                                                                                                                                                                                                                                                                                                                                                                                                                                                                                                                                                                                                                                                                                                                                                                                                                                                                                                                                                                                                                                                                                                                                                                                                                                                                                                                                                                                                                                                                                                                                                                                                                                                                                                                                                 |           |         |         |         |         |         |         |         |          |          |          |          |          |          |          |          |          |          |          |          |          |          |          |          |          |          |          |          |          |          |          |          |          |          |          |          |          |          |          |          |          |          |          |          |          |          |          |          |          |          |          |          |          |          |          |           |           |           |           |           |           |           |           |           |           |           |           |           |           |           |           |           |           |           |           |           |           |           |           |           |           |           |           |           |           |           |           |           |           |           |           |           |           |           |           |           |           |           |           |           |           |           |
| H                                                                                                                                                                                                                                                                                                                                                                                                                                                                                                                                                                                                                                                                                                                                                                                                                                                                                                                                                                                                                                                                                                                                                                                                                                                                                                                                                                                                                                                                                                                                                                                                                                                                                                                                                                                                                                                                                                                                                                                                                                                                                                                                                                                                                                                                                                                                                                                                                                                                                                                                                                                                                                                                                                                                                                                         | 3.50066                                                                           | 2.09532                                                                            | 0.48615  |   |   |          |          |          |   |          |          |         |    |          |          |          |    |          |          |         |    |         |          |          |   |          |          |         |   |          |          |         |   |          |          |          |   |          |          |          |    |         |         |          |    |         |          |         |   |         |         |          |   |         |         |         |   |         |         |         |   |         |          |         |   |         |         |         |   |         |         |         |   |          |         |          |   |         |         |         |   |          |         |         |   |          |         |          |   |          |         |          |   |          |         |          |   |          |         |         |   |          |         |         |   |          |         |         |   |          |         |          |   |          |         |         |   |          |         |          |   |          |         |          |   |          |         |          |   |          |         |         |                                                                                                                                                                                                                                                                                                                                                                                                                                                                                                                                                                                                                                                                                                                                                                                                                                                                                                                                                                                                                                                                                                                                                                                                                                                                                                                                                                                                                                                                                                                                                                                                                                                                                                                                                                                                                                                                                                                                                                                                                                                                                                                                                                                                                                                                                                 |           |         |         |         |         |         |         |         |          |          |          |          |          |          |          |          |          |          |          |          |          |          |          |          |          |          |          |          |          |          |          |          |          |          |          |          |          |          |          |          |          |          |          |          |          |          |          |          |          |          |          |          |          |          |          |           |           |           |           |           |           |           |           |           |           |           |           |           |           |           |           |           |           |           |           |           |           |           |           |           |           |           |           |           |           |           |           |           |           |           |           |           |           |           |           |           |           |           |           |           |           |           |
| C                                                                                                                                                                                                                                                                                                                                                                                                                                                                                                                                                                                                                                                                                                                                                                                                                                                                                                                                                                                                                                                                                                                                                                                                                                                                                                                                                                                                                                                                                                                                                                                                                                                                                                                                                                                                                                                                                                                                                                                                                                                                                                                                                                                                                                                                                                                                                                                                                                                                                                                                                                                                                                                                                                                                                                                         | -0.33450                                                                          | 2.60333                                                                            | -0.73752 |   |   |          |          |          |   |          |          |         |    |          |          |          |    |          |          |         |    |         |          |          |   |          |          |         |   |          |          |         |   |          |          |          |   |          |          |          |    |         |         |          |    |         |          |         |   |         |         |          |   |         |         |         |   |         |         |         |   |         |          |         |   |         |         |         |   |         |         |         |   |          |         |          |   |         |         |         |   |          |         |         |   |          |         |          |   |          |         |          |   |          |         |          |   |          |         |         |   |          |         |         |   |          |         |         |   |          |         |          |   |          |         |         |   |          |         |          |   |          |         |          |   |          |         |          |   |          |         |         |                                                                                                                                                                                                                                                                                                                                                                                                                                                                                                                                                                                                                                                                                                                                                                                                                                                                                                                                                                                                                                                                                                                                                                                                                                                                                                                                                                                                                                                                                                                                                                                                                                                                                                                                                                                                                                                                                                                                                                                                                                                                                                                                                                                                                                                                                                 |           |         |         |         |         |         |         |         |          |          |          |          |          |          |          |          |          |          |          |          |          |          |          |          |          |          |          |          |          |          |          |          |          |          |          |          |          |          |          |          |          |          |          |          |          |          |          |          |          |          |          |          |          |          |          |           |           |           |           |           |           |           |           |           |           |           |           |           |           |           |           |           |           |           |           |           |           |           |           |           |           |           |           |           |           |           |           |           |           |           |           |           |           |           |           |           |           |           |           |           |           |           |
| O                                                                                                                                                                                                                                                                                                                                                                                                                                                                                                                                                                                                                                                                                                                                                                                                                                                                                                                                                                                                                                                                                                                                                                                                                                                                                                                                                                                                                                                                                                                                                                                                                                                                                                                                                                                                                                                                                                                                                                                                                                                                                                                                                                                                                                                                                                                                                                                                                                                                                                                                                                                                                                                                                                                                                                                         | 0.46292                                                                           | 1.33660                                                                            | 1.18128  |   |   |          |          |          |   |          |          |         |    |          |          |          |    |          |          |         |    |         |          |          |   |          |          |         |   |          |          |         |   |          |          |          |   |          |          |          |    |         |         |          |    |         |          |         |   |         |         |          |   |         |         |         |   |         |         |         |   |         |          |         |   |         |         |         |   |         |         |         |   |          |         |          |   |         |         |         |   |          |         |         |   |          |         |          |   |          |         |          |   |          |         |          |   |          |         |         |   |          |         |         |   |          |         |         |   |          |         |          |   |          |         |         |   |          |         |          |   |          |         |          |   |          |         |          |   |          |         |         |                                                                                                                                                                                                                                                                                                                                                                                                                                                                                                                                                                                                                                                                                                                                                                                                                                                                                                                                                                                                                                                                                                                                                                                                                                                                                                                                                                                                                                                                                                                                                                                                                                                                                                                                                                                                                                                                                                                                                                                                                                                                                                                                                                                                                                                                                                 |           |         |         |         |         |         |         |         |          |          |          |          |          |          |          |          |          |          |          |          |          |          |          |          |          |          |          |          |          |          |          |          |          |          |          |          |          |          |          |          |          |          |          |          |          |          |          |          |          |          |          |          |          |          |          |           |           |           |           |           |           |           |           |           |           |           |           |           |           |           |           |           |           |           |           |           |           |           |           |           |           |           |           |           |           |           |           |           |           |           |           |           |           |           |           |           |           |           |           |           |           |           |
| C                                                                                                                                                                                                                                                                                                                                                                                                                                                                                                                                                                                                                                                                                                                                                                                                                                                                                                                                                                                                                                                                                                                                                                                                                                                                                                                                                                                                                                                                                                                                                                                                                                                                                                                                                                                                                                                                                                                                                                                                                                                                                                                                                                                                                                                                                                                                                                                                                                                                                                                                                                                                                                                                                                                                                                                         | -0.52685                                                                          | 1.92268                                                                            | 0.50686  |   |   |          |          |          |   |          |          |         |    |          |          |          |    |          |          |         |    |         |          |          |   |          |          |         |   |          |          |         |   |          |          |          |   |          |          |          |    |         |         |          |    |         |          |         |   |         |         |          |   |         |         |         |   |         |         |         |   |         |          |         |   |         |         |         |   |         |         |         |   |          |         |          |   |         |         |         |   |          |         |         |   |          |         |          |   |          |         |          |   |          |         |          |   |          |         |         |   |          |         |         |   |          |         |         |   |          |         |          |   |          |         |         |   |          |         |          |   |          |         |          |   |          |         |          |   |          |         |         |                                                                                                                                                                                                                                                                                                                                                                                                                                                                                                                                                                                                                                                                                                                                                                                                                                                                                                                                                                                                                                                                                                                                                                                                                                                                                                                                                                                                                                                                                                                                                                                                                                                                                                                                                                                                                                                                                                                                                                                                                                                                                                                                                                                                                                                                                                 |           |         |         |         |         |         |         |         |          |          |          |          |          |          |          |          |          |          |          |          |          |          |          |          |          |          |          |          |          |          |          |          |          |          |          |          |          |          |          |          |          |          |          |          |          |          |          |          |          |          |          |          |          |          |          |           |           |           |           |           |           |           |           |           |           |           |           |           |           |           |           |           |           |           |           |           |           |           |           |           |           |           |           |           |           |           |           |           |           |           |           |           |           |           |           |           |           |           |           |           |           |           |
| C                                                                                                                                                                                                                                                                                                                                                                                                                                                                                                                                                                                                                                                                                                                                                                                                                                                                                                                                                                                                                                                                                                                                                                                                                                                                                                                                                                                                                                                                                                                                                                                                                                                                                                                                                                                                                                                                                                                                                                                                                                                                                                                                                                                                                                                                                                                                                                                                                                                                                                                                                                                                                                                                                                                                                                                         | -0.93750                                                                          | 1.20861                                                                            | -1.21459 |   |   |          |          |          |   |          |          |         |    |          |          |          |    |          |          |         |    |         |          |          |   |          |          |         |   |          |          |         |   |          |          |          |   |          |          |          |    |         |         |          |    |         |          |         |   |         |         |          |   |         |         |         |   |         |         |         |   |         |          |         |   |         |         |         |   |         |         |         |   |          |         |          |   |         |         |         |   |          |         |         |   |          |         |          |   |          |         |          |   |          |         |          |   |          |         |         |   |          |         |         |   |          |         |         |   |          |         |          |   |          |         |         |   |          |         |          |   |          |         |          |   |          |         |          |   |          |         |         |                                                                                                                                                                                                                                                                                                                                                                                                                                                                                                                                                                                                                                                                                                                                                                                                                                                                                                                                                                                                                                                                                                                                                                                                                                                                                                                                                                                                                                                                                                                                                                                                                                                                                                                                                                                                                                                                                                                                                                                                                                                                                                                                                                                                                                                                                                 |           |         |         |         |         |         |         |         |          |          |          |          |          |          |          |          |          |          |          |          |          |          |          |          |          |          |          |          |          |          |          |          |          |          |          |          |          |          |          |          |          |          |          |          |          |          |          |          |          |          |          |          |          |          |          |           |           |           |           |           |           |           |           |           |           |           |           |           |           |           |           |           |           |           |           |           |           |           |           |           |           |           |           |           |           |           |           |           |           |           |           |           |           |           |           |           |           |           |           |           |           |           |
| H                                                                                                                                                                                                                                                                                                                                                                                                                                                                                                                                                                                                                                                                                                                                                                                                                                                                                                                                                                                                                                                                                                                                                                                                                                                                                                                                                                                                                                                                                                                                                                                                                                                                                                                                                                                                                                                                                                                                                                                                                                                                                                                                                                                                                                                                                                                                                                                                                                                                                                                                                                                                                                                                                                                                                                                         | -1.92229                                                                          | 1.39039                                                                            | -1.63873 |   |   |          |          |          |   |          |          |         |    |          |          |          |    |          |          |         |    |         |          |          |   |          |          |         |   |          |          |         |   |          |          |          |   |          |          |          |    |         |         |          |    |         |          |         |   |         |         |          |   |         |         |         |   |         |         |         |   |         |          |         |   |         |         |         |   |         |         |         |   |          |         |          |   |         |         |         |   |          |         |         |   |          |         |          |   |          |         |          |   |          |         |          |   |          |         |         |   |          |         |         |   |          |         |         |   |          |         |          |   |          |         |         |   |          |         |          |   |          |         |          |   |          |         |          |   |          |         |         |                                                                                                                                                                                                                                                                                                                                                                                                                                                                                                                                                                                                                                                                                                                                                                                                                                                                                                                                                                                                                                                                                                                                                                                                                                                                                                                                                                                                                                                                                                                                                                                                                                                                                                                                                                                                                                                                                                                                                                                                                                                                                                                                                                                                                                                                                                 |           |         |         |         |         |         |         |         |          |          |          |          |          |          |          |          |          |          |          |          |          |          |          |          |          |          |          |          |          |          |          |          |          |          |          |          |          |          |          |          |          |          |          |          |          |          |          |          |          |          |          |          |          |          |          |           |           |           |           |           |           |           |           |           |           |           |           |           |           |           |           |           |           |           |           |           |           |           |           |           |           |           |           |           |           |           |           |           |           |           |           |           |           |           |           |           |           |           |           |           |           |           |
| H                                                                                                                                                                                                                                                                                                                                                                                                                                                                                                                                                                                                                                                                                                                                                                                                                                                                                                                                                                                                                                                                                                                                                                                                                                                                                                                                                                                                                                                                                                                                                                                                                                                                                                                                                                                                                                                                                                                                                                                                                                                                                                                                                                                                                                                                                                                                                                                                                                                                                                                                                                                                                                                                                                                                                                                         | -0.18146                                                                          | 0.86783                                                                            | -1.92285 |   |   |          |          |          |   |          |          |         |    |          |          |          |    |          |          |         |    |         |          |          |   |          |          |         |   |          |          |         |   |          |          |          |   |          |          |          |    |         |         |          |    |         |          |         |   |         |         |          |   |         |         |         |   |         |         |         |   |         |          |         |   |         |         |         |   |         |         |         |   |          |         |          |   |         |         |         |   |          |         |         |   |          |         |          |   |          |         |          |   |          |         |          |   |          |         |         |   |          |         |         |   |          |         |         |   |          |         |          |   |          |         |         |   |          |         |          |   |          |         |          |   |          |         |          |   |          |         |         |                                                                                                                                                                                                                                                                                                                                                                                                                                                                                                                                                                                                                                                                                                                                                                                                                                                                                                                                                                                                                                                                                                                                                                                                                                                                                                                                                                                                                                                                                                                                                                                                                                                                                                                                                                                                                                                                                                                                                                                                                                                                                                                                                                                                                                                                                                 |           |         |         |         |         |         |         |         |          |          |          |          |          |          |          |          |          |          |          |          |          |          |          |          |          |          |          |          |          |          |          |          |          |          |          |          |          |          |          |          |          |          |          |          |          |          |          |          |          |          |          |          |          |          |          |           |           |           |           |           |           |           |           |           |           |           |           |           |           |           |           |           |           |           |           |           |           |           |           |           |           |           |           |           |           |           |           |           |           |           |           |           |           |           |           |           |           |           |           |           |           |           |
| C                                                                                                                                                                                                                                                                                                                                                                                                                                                                                                                                                                                                                                                                                                                                                                                                                                                                                                                                                                                                                                                                                                                                                                                                                                                                                                                                                                                                                                                                                                                                                                                                                                                                                                                                                                                                                                                                                                                                                                                                                                                                                                                                                                                                                                                                                                                                                                                                                                                                                                                                                                                                                                                                                                                                                                                         | -1.76908                                                                          | 2.44732                                                                            | 1.19458  |   |   |          |          |          |   |          |          |         |    |          |          |          |    |          |          |         |    |         |          |          |   |          |          |         |   |          |          |         |   |          |          |          |   |          |          |          |    |         |         |          |    |         |          |         |   |         |         |          |   |         |         |         |   |         |         |         |   |         |          |         |   |         |         |         |   |         |         |         |   |          |         |          |   |         |         |         |   |          |         |         |   |          |         |          |   |          |         |          |   |          |         |          |   |          |         |         |   |          |         |         |   |          |         |         |   |          |         |          |   |          |         |         |   |          |         |          |   |          |         |          |   |          |         |          |   |          |         |         |                                                                                                                                                                                                                                                                                                                                                                                                                                                                                                                                                                                                                                                                                                                                                                                                                                                                                                                                                                                                                                                                                                                                                                                                                                                                                                                                                                                                                                                                                                                                                                                                                                                                                                                                                                                                                                                                                                                                                                                                                                                                                                                                                                                                                                                                                                 |           |         |         |         |         |         |         |         |          |          |          |          |          |          |          |          |          |          |          |          |          |          |          |          |          |          |          |          |          |          |          |          |          |          |          |          |          |          |          |          |          |          |          |          |          |          |          |          |          |          |          |          |          |          |          |           |           |           |           |           |           |           |           |           |           |           |           |           |           |           |           |           |           |           |           |           |           |           |           |           |           |           |           |           |           |           |           |           |           |           |           |           |           |           |           |           |           |           |           |           |           |           |
| H                                                                                                                                                                                                                                                                                                                                                                                                                                                                                                                                                                                                                                                                                                                                                                                                                                                                                                                                                                                                                                                                                                                                                                                                                                                                                                                                                                                                                                                                                                                                                                                                                                                                                                                                                                                                                                                                                                                                                                                                                                                                                                                                                                                                                                                                                                                                                                                                                                                                                                                                                                                                                                                                                                                                                                                         | -2.38657                                                                          | 1.68549                                                                            | 1.67067  |   |   |          |          |          |   |          |          |         |    |          |          |          |    |          |          |         |    |         |          |          |   |          |          |         |   |          |          |         |   |          |          |          |   |          |          |          |    |         |         |          |    |         |          |         |   |         |         |          |   |         |         |         |   |         |         |         |   |         |          |         |   |         |         |         |   |         |         |         |   |          |         |          |   |         |         |         |   |          |         |         |   |          |         |          |   |          |         |          |   |          |         |          |   |          |         |         |   |          |         |         |   |          |         |         |   |          |         |          |   |          |         |         |   |          |         |          |   |          |         |          |   |          |         |          |   |          |         |         |                                                                                                                                                                                                                                                                                                                                                                                                                                                                                                                                                                                                                                                                                                                                                                                                                                                                                                                                                                                                                                                                                                                                                                                                                                                                                                                                                                                                                                                                                                                                                                                                                                                                                                                                                                                                                                                                                                                                                                                                                                                                                                                                                                                                                                                                                                 |           |         |         |         |         |         |         |         |          |          |          |          |          |          |          |          |          |          |          |          |          |          |          |          |          |          |          |          |          |          |          |          |          |          |          |          |          |          |          |          |          |          |          |          |          |          |          |          |          |          |          |          |          |          |          |           |           |           |           |           |           |           |           |           |           |           |           |           |           |           |           |           |           |           |           |           |           |           |           |           |           |           |           |           |           |           |           |           |           |           |           |           |           |           |           |           |           |           |           |           |           |           |
| C                                                                                                                                                                                                                                                                                                                                                                                                                                                                                                                                                                                                                                                                                                                                                                                                                                                                                                                                                                                                                                                                                                                                                                                                                                                                                                                                                                                                                                                                                                                                                                                                                                                                                                                                                                                                                                                                                                                                                                                                                                                                                                                                                                                                                                                                                                                                                                                                                                                                                                                                                                                                                                                                                                                                                                                         | -2.48916                                                                          | 3.26236                                                                            | 0.11521  |   |   |          |          |          |   |          |          |         |    |          |          |          |    |          |          |         |    |         |          |          |   |          |          |         |   |          |          |         |   |          |          |          |   |          |          |          |    |         |         |          |    |         |          |         |   |         |         |          |   |         |         |         |   |         |         |         |   |         |          |         |   |         |         |         |   |         |         |         |   |          |         |          |   |         |         |         |   |          |         |         |   |          |         |          |   |          |         |          |   |          |         |          |   |          |         |         |   |          |         |         |   |          |         |         |   |          |         |          |   |          |         |         |   |          |         |          |   |          |         |          |   |          |         |          |   |          |         |         |                                                                                                                                                                                                                                                                                                                                                                                                                                                                                                                                                                                                                                                                                                                                                                                                                                                                                                                                                                                                                                                                                                                                                                                                                                                                                                                                                                                                                                                                                                                                                                                                                                                                                                                                                                                                                                                                                                                                                                                                                                                                                                                                                                                                                                                                                                 |           |         |         |         |         |         |         |         |          |          |          |          |          |          |          |          |          |          |          |          |          |          |          |          |          |          |          |          |          |          |          |          |          |          |          |          |          |          |          |          |          |          |          |          |          |          |          |          |          |          |          |          |          |          |          |           |           |           |           |           |           |           |           |           |           |           |           |           |           |           |           |           |           |           |           |           |           |           |           |           |           |           |           |           |           |           |           |           |           |           |           |           |           |           |           |           |           |           |           |           |           |           |
| H                                                                                                                                                                                                                                                                                                                                                                                                                                                                                                                                                                                                                                                                                                                                                                                                                                                                                                                                                                                                                                                                                                                                                                                                                                                                                                                                                                                                                                                                                                                                                                                                                                                                                                                                                                                                                                                                                                                                                                                                                                                                                                                                                                                                                                                                                                                                                                                                                                                                                                                                                                                                                                                                                                                                                                                         | -3.19944                                                                          | 2.61793                                                                            | -0.40828 |   |   |          |          |          |   |          |          |         |    |          |          |          |    |          |          |         |    |         |          |          |   |          |          |         |   |          |          |         |   |          |          |          |   |          |          |          |    |         |         |          |    |         |          |         |   |         |         |          |   |         |         |         |   |         |         |         |   |         |          |         |   |         |         |         |   |         |         |         |   |          |         |          |   |         |         |         |   |          |         |         |   |          |         |          |   |          |         |          |   |          |         |          |   |          |         |         |   |          |         |         |   |          |         |         |   |          |         |          |   |          |         |         |   |          |         |          |   |          |         |          |   |          |         |          |   |          |         |         |                                                                                                                                                                                                                                                                                                                                                                                                                                                                                                                                                                                                                                                                                                                                                                                                                                                                                                                                                                                                                                                                                                                                                                                                                                                                                                                                                                                                                                                                                                                                                                                                                                                                                                                                                                                                                                                                                                                                                                                                                                                                                                                                                                                                                                                                                                 |           |         |         |         |         |         |         |         |          |          |          |          |          |          |          |          |          |          |          |          |          |          |          |          |          |          |          |          |          |          |          |          |          |          |          |          |          |          |          |          |          |          |          |          |          |          |          |          |          |          |          |          |          |          |          |           |           |           |           |           |           |           |           |           |           |           |           |           |           |           |           |           |           |           |           |           |           |           |           |           |           |           |           |           |           |           |           |           |           |           |           |           |           |           |           |           |           |           |           |           |           |           |
| H                                                                                                                                                                                                                                                                                                                                                                                                                                                                                                                                                                                                                                                                                                                                                                                                                                                                                                                                                                                                                                                                                                                                                                                                                                                                                                                                                                                                                                                                                                                                                                                                                                                                                                                                                                                                                                                                                                                                                                                                                                                                                                                                                                                                                                                                                                                                                                                                                                                                                                                                                                                                                                                                                                                                                                                         | -3.04918                                                                          | 4.09626                                                                            | 0.54085  |   |   |          |          |          |   |          |          |         |    |          |          |          |    |          |          |         |    |         |          |          |   |          |          |         |   |          |          |         |   |          |          |          |   |          |          |          |    |         |         |          |    |         |          |         |   |         |         |          |   |         |         |         |   |         |         |         |   |         |          |         |   |         |         |         |   |         |         |         |   |          |         |          |   |         |         |         |   |          |         |         |   |          |         |          |   |          |         |          |   |          |         |          |   |          |         |         |   |          |         |         |   |          |         |         |   |          |         |          |   |          |         |         |   |          |         |          |   |          |         |          |   |          |         |          |   |          |         |         |                                                                                                                                                                                                                                                                                                                                                                                                                                                                                                                                                                                                                                                                                                                                                                                                                                                                                                                                                                                                                                                                                                                                                                                                                                                                                                                                                                                                                                                                                                                                                                                                                                                                                                                                                                                                                                                                                                                                                                                                                                                                                                                                                                                                                                                                                                 |           |         |         |         |         |         |         |         |          |          |          |          |          |          |          |          |          |          |          |          |          |          |          |          |          |          |          |          |          |          |          |          |          |          |          |          |          |          |          |          |          |          |          |          |          |          |          |          |          |          |          |          |          |          |          |           |           |           |           |           |           |           |           |           |           |           |           |           |           |           |           |           |           |           |           |           |           |           |           |           |           |           |           |           |           |           |           |           |           |           |           |           |           |           |           |           |           |           |           |           |           |           |
| C                                                                                                                                                                                                                                                                                                                                                                                                                                                                                                                                                                                                                                                                                                                                                                                                                                                                                                                                                                                                                                                                                                                                                                                                                                                                                                                                                                                                                                                                                                                                                                                                                                                                                                                                                                                                                                                                                                                                                                                                                                                                                                                                                                                                                                                                                                                                                                                                                                                                                                                                                                                                                                                                                                                                                                                         | -1.35546                                                                          | 3.72752                                                                            | -0.82051 |   |   |          |          |          |   |          |          |         |    |          |          |          |    |          |          |         |    |         |          |          |   |          |          |         |   |          |          |         |   |          |          |          |   |          |          |          |    |         |         |          |    |         |          |         |   |         |         |          |   |         |         |         |   |         |         |         |   |         |          |         |   |         |         |         |   |         |         |         |   |          |         |          |   |         |         |         |   |          |         |         |   |          |         |          |   |          |         |          |   |          |         |          |   |          |         |         |   |          |         |         |   |          |         |         |   |          |         |          |   |          |         |         |   |          |         |          |   |          |         |          |   |          |         |          |   |          |         |         |                                                                                                                                                                                                                                                                                                                                                                                                                                                                                                                                                                                                                                                                                                                                                                                                                                                                                                                                                                                                                                                                                                                                                                                                                                                                                                                                                                                                                                                                                                                                                                                                                                                                                                                                                                                                                                                                                                                                                                                                                                                                                                                                                                                                                                                                                                 |           |         |         |         |         |         |         |         |          |          |          |          |          |          |          |          |          |          |          |          |          |          |          |          |          |          |          |          |          |          |          |          |          |          |          |          |          |          |          |          |          |          |          |          |          |          |          |          |          |          |          |          |          |          |          |           |           |           |           |           |           |           |           |           |           |           |           |           |           |           |           |           |           |           |           |           |           |           |           |           |           |           |           |           |           |           |           |           |           |           |           |           |           |           |           |           |           |           |           |           |           |           |
| H                                                                                                                                                                                                                                                                                                                                                                                                                                                                                                                                                                                                                                                                                                                                                                                                                                                                                                                                                                                                                                                                                                                                                                                                                                                                                                                                                                                                                                                                                                                                                                                                                                                                                                                                                                                                                                                                                                                                                                                                                                                                                                                                                                                                                                                                                                                                                                                                                                                                                                                                                                                                                                                                                                                                                                                         | -1.68820                                                                          | 3.90586                                                                            | -1.84583 |   |   |          |          |          |   |          |          |         |    |          |          |          |    |          |          |         |    |         |          |          |   |          |          |         |   |          |          |         |   |          |          |          |   |          |          |          |    |         |         |          |    |         |          |         |   |         |         |          |   |         |         |         |   |         |         |         |   |         |          |         |   |         |         |         |   |         |         |         |   |          |         |          |   |         |         |         |   |          |         |         |   |          |         |          |   |          |         |          |   |          |         |          |   |          |         |         |   |          |         |         |   |          |         |         |   |          |         |          |   |          |         |         |   |          |         |          |   |          |         |          |   |          |         |          |   |          |         |         |                                                                                                                                                                                                                                                                                                                                                                                                                                                                                                                                                                                                                                                                                                                                                                                                                                                                                                                                                                                                                                                                                                                                                                                                                                                                                                                                                                                                                                                                                                                                                                                                                                                                                                                                                                                                                                                                                                                                                                                                                                                                                                                                                                                                                                                                                                 |           |         |         |         |         |         |         |         |          |          |          |          |          |          |          |          |          |          |          |          |          |          |          |          |          |          |          |          |          |          |          |          |          |          |          |          |          |          |          |          |          |          |          |          |          |          |          |          |          |          |          |          |          |          |          |           |           |           |           |           |           |           |           |           |           |           |           |           |           |           |           |           |           |           |           |           |           |           |           |           |           |           |           |           |           |           |           |           |           |           |           |           |           |           |           |           |           |           |           |           |           |           |
| H                                                                                                                                                                                                                                                                                                                                                                                                                                                                                                                                                                                                                                                                                                                                                                                                                                                                                                                                                                                                                                                                                                                                                                                                                                                                                                                                                                                                                                                                                                                                                                                                                                                                                                                                                                                                                                                                                                                                                                                                                                                                                                                                                                                                                                                                                                                                                                                                                                                                                                                                                                                                                                                                                                                                                                                         | -0.89727                                                                          | 4.64985                                                                            | -0.44647 |   |   |          |          |          |   |          |          |         |    |          |          |          |    |          |          |         |    |         |          |          |   |          |          |         |   |          |          |         |   |          |          |          |   |          |          |          |    |         |         |          |    |         |          |         |   |         |         |          |   |         |         |         |   |         |         |         |   |         |          |         |   |         |         |         |   |         |         |         |   |          |         |          |   |         |         |         |   |          |         |         |   |          |         |          |   |          |         |          |   |          |         |          |   |          |         |         |   |          |         |         |   |          |         |         |   |          |         |          |   |          |         |         |   |          |         |          |   |          |         |          |   |          |         |          |   |          |         |         |                                                                                                                                                                                                                                                                                                                                                                                                                                                                                                                                                                                                                                                                                                                                                                                                                                                                                                                                                                                                                                                                                                                                                                                                                                                                                                                                                                                                                                                                                                                                                                                                                                                                                                                                                                                                                                                                                                                                                                                                                                                                                                                                                                                                                                                                                                 |           |         |         |         |         |         |         |         |          |          |          |          |          |          |          |          |          |          |          |          |          |          |          |          |          |          |          |          |          |          |          |          |          |          |          |          |          |          |          |          |          |          |          |          |          |          |          |          |          |          |          |          |          |          |          |           |           |           |           |           |           |           |           |           |           |           |           |           |           |           |           |           |           |           |           |           |           |           |           |           |           |           |           |           |           |           |           |           |           |           |           |           |           |           |           |           |           |           |           |           |           |           |
| H                                                                                                                                                                                                                                                                                                                                                                                                                                                                                                                                                                                                                                                                                                                                                                                                                                                                                                                                                                                                                                                                                                                                                                                                                                                                                                                                                                                                                                                                                                                                                                                                                                                                                                                                                                                                                                                                                                                                                                                                                                                                                                                                                                                                                                                                                                                                                                                                                                                                                                                                                                                                                                                                                                                                                                                         | -1.37015                                                                          | 3.11389                                                                            | 1.97247  |   |   |          |          |          |   |          |          |         |    |          |          |          |    |          |          |         |    |         |          |          |   |          |          |         |   |          |          |         |   |          |          |          |   |          |          |          |    |         |         |          |    |         |          |         |   |         |         |          |   |         |         |         |   |         |         |         |   |         |          |         |   |         |         |         |   |         |         |         |   |          |         |          |   |         |         |         |   |          |         |         |   |          |         |          |   |          |         |          |   |          |         |          |   |          |         |         |   |          |         |         |   |          |         |         |   |          |         |          |   |          |         |         |   |          |         |          |   |          |         |          |   |          |         |          |   |          |         |         |                                                                                                                                                                                                                                                                                                                                                                                                                                                                                                                                                                                                                                                                                                                                                                                                                                                                                                                                                                                                                                                                                                                                                                                                                                                                                                                                                                                                                                                                                                                                                                                                                                                                                                                                                                                                                                                                                                                                                                                                                                                                                                                                                                                                                                                                                                 |           |         |         |         |         |         |         |         |          |          |          |          |          |          |          |          |          |          |          |          |          |          |          |          |          |          |          |          |          |          |          |          |          |          |          |          |          |          |          |          |          |          |          |          |          |          |          |          |          |          |          |          |          |          |          |           |           |           |           |           |           |           |           |           |           |           |           |           |           |           |           |           |           |           |           |           |           |           |           |           |           |           |           |           |           |           |           |           |           |           |           |           |           |           |           |           |           |           |           |           |           |           |
| -255.7367                                                                                                                                                                                                                                                                                                                                                                                                                                                                                                                                                                                                                                                                                                                                                                                                                                                                                                                                                                                                                                                                                                                                                                                                                                                                                                                                                                                                                                                                                                                                                                                                                                                                                                                                                                                                                                                                                                                                                                                                                                                                                                                                                                                                                                                                                                                                                                                                                                                                                                                                                                                                                                                                                                                                                                                 | 28.7838                                                                           | 38.2555                                                                            |          |   |   |          |          |          |   |          |          |         |    |          |          |          |    |          |          |         |    |         |          |          |   |          |          |         |   |          |          |         |   |          |          |          |   |          |          |          |    |         |         |          |    |         |          |         |   |         |         |          |   |         |         |         |   |         |         |         |   |         |          |         |   |         |         |         |   |         |         |         |   |          |         |          |   |         |         |         |   |          |         |         |   |          |         |          |   |          |         |          |   |          |         |          |   |          |         |         |   |          |         |         |   |          |         |         |   |          |         |          |   |          |         |         |   |          |         |          |   |          |         |          |   |          |         |          |   |          |         |         |                                                                                                                                                                                                                                                                                                                                                                                                                                                                                                                                                                                                                                                                                                                                                                                                                                                                                                                                                                                                                                                                                                                                                                                                                                                                                                                                                                                                                                                                                                                                                                                                                                                                                                                                                                                                                                                                                                                                                                                                                                                                                                                                                                                                                                                                                                 |           |         |         |         |         |         |         |         |          |          |          |          |          |          |          |          |          |          |          |          |          |          |          |          |          |          |          |          |          |          |          |          |          |          |          |          |          |          |          |          |          |          |          |          |          |          |          |          |          |          |          |          |          |          |          |           |           |           |           |           |           |           |           |           |           |           |           |           |           |           |           |           |           |           |           |           |           |           |           |           |           |           |           |           |           |           |           |           |           |           |           |           |           |           |           |           |           |           |           |           |           |           |
| 64.1081                                                                                                                                                                                                                                                                                                                                                                                                                                                                                                                                                                                                                                                                                                                                                                                                                                                                                                                                                                                                                                                                                                                                                                                                                                                                                                                                                                                                                                                                                                                                                                                                                                                                                                                                                                                                                                                                                                                                                                                                                                                                                                                                                                                                                                                                                                                                                                                                                                                                                                                                                                                                                                                                                                                                                                                   | 71.2572                                                                           | 86.3613                                                                            |          |   |   |          |          |          |   |          |          |         |    |          |          |          |    |          |          |         |    |         |          |          |   |          |          |         |   |          |          |         |   |          |          |          |   |          |          |          |    |         |         |          |    |         |          |         |   |         |         |          |   |         |         |         |   |         |         |         |   |         |          |         |   |         |         |         |   |         |         |         |   |          |         |          |   |         |         |         |   |          |         |         |   |          |         |          |   |          |         |          |   |          |         |          |   |          |         |         |   |          |         |         |   |          |         |         |   |          |         |          |   |          |         |         |   |          |         |          |   |          |         |          |   |          |         |          |   |          |         |         |                                                                                                                                                                                                                                                                                                                                                                                                                                                                                                                                                                                                                                                                                                                                                                                                                                                                                                                                                                                                                                                                                                                                                                                                                                                                                                                                                                                                                                                                                                                                                                                                                                                                                                                                                                                                                                                                                                                                                                                                                                                                                                                                                                                                                                                                                                 |           |         |         |         |         |         |         |         |          |          |          |          |          |          |          |          |          |          |          |          |          |          |          |          |          |          |          |          |          |          |          |          |          |          |          |          |          |          |          |          |          |          |          |          |          |          |          |          |          |          |          |          |          |          |          |           |           |           |           |           |           |           |           |           |           |           |           |           |           |           |           |           |           |           |           |           |           |           |           |           |           |           |           |           |           |           |           |           |           |           |           |           |           |           |           |           |           |           |           |           |           |           |
| 88.2885                                                                                                                                                                                                                                                                                                                                                                                                                                                                                                                                                                                                                                                                                                                                                                                                                                                                                                                                                                                                                                                                                                                                                                                                                                                                                                                                                                                                                                                                                                                                                                                                                                                                                                                                                                                                                                                                                                                                                                                                                                                                                                                                                                                                                                                                                                                                                                                                                                                                                                                                                                                                                                                                                                                                                                                   | 94.2271                                                                           | 106.7020                                                                           |          |   |   |          |          |          |   |          |          |         |    |          |          |          |    |          |          |         |    |         |          |          |   |          |          |         |   |          |          |         |   |          |          |          |   |          |          |          |    |         |         |          |    |         |          |         |   |         |         |          |   |         |         |         |   |         |         |         |   |         |          |         |   |         |         |         |   |         |         |         |   |          |         |          |   |         |         |         |   |          |         |         |   |          |         |          |   |          |         |          |   |          |         |          |   |          |         |         |   |          |         |         |   |          |         |         |   |          |         |          |   |          |         |         |   |          |         |          |   |          |         |          |   |          |         |          |   |          |         |         |                                                                                                                                                                                                                                                                                                                                                                                                                                                                                                                                                                                                                                                                                                                                                                                                                                                                                                                                                                                                                                                                                                                                                                                                                                                                                                                                                                                                                                                                                                                                                                                                                                                                                                                                                                                                                                                                                                                                                                                                                                                                                                                                                                                                                                                                                                 |           |         |         |         |         |         |         |         |          |          |          |          |          |          |          |          |          |          |          |          |          |          |          |          |          |          |          |          |          |          |          |          |          |          |          |          |          |          |          |          |          |          |          |          |          |          |          |          |          |          |          |          |          |          |          |           |           |           |           |           |           |           |           |           |           |           |           |           |           |           |           |           |           |           |           |           |           |           |           |           |           |           |           |           |           |           |           |           |           |           |           |           |           |           |           |           |           |           |           |           |           |           |
| 117.7413                                                                                                                                                                                                                                                                                                                                                                                                                                                                                                                                                                                                                                                                                                                                                                                                                                                                                                                                                                                                                                                                                                                                                                                                                                                                                                                                                                                                                                                                                                                                                                                                                                                                                                                                                                                                                                                                                                                                                                                                                                                                                                                                                                                                                                                                                                                                                                                                                                                                                                                                                                                                                                                                                                                                                                                  | 125.7429                                                                          | 136.5597                                                                           |          |   |   |          |          |          |   |          |          |         |    |          |          |          |    |          |          |         |    |         |          |          |   |          |          |         |   |          |          |         |   |          |          |          |   |          |          |          |    |         |         |          |    |         |          |         |   |         |         |          |   |         |         |         |   |         |         |         |   |         |          |         |   |         |         |         |   |         |         |         |   |          |         |          |   |         |         |         |   |          |         |         |   |          |         |          |   |          |         |          |   |          |         |          |   |          |         |         |   |          |         |         |   |          |         |         |   |          |         |          |   |          |         |         |   |          |         |          |   |          |         |          |   |          |         |          |   |          |         |         |                                                                                                                                                                                                                                                                                                                                                                                                                                                                                                                                                                                                                                                                                                                                                                                                                                                                                                                                                                                                                                                                                                                                                                                                                                                                                                                                                                                                                                                                                                                                                                                                                                                                                                                                                                                                                                                                                                                                                                                                                                                                                                                                                                                                                                                                                                 |           |         |         |         |         |         |         |         |          |          |          |          |          |          |          |          |          |          |          |          |          |          |          |          |          |          |          |          |          |          |          |          |          |          |          |          |          |          |          |          |          |          |          |          |          |          |          |          |          |          |          |          |          |          |          |           |           |           |           |           |           |           |           |           |           |           |           |           |           |           |           |           |           |           |           |           |           |           |           |           |           |           |           |           |           |           |           |           |           |           |           |           |           |           |           |           |           |           |           |           |           |           |
| 146.1214                                                                                                                                                                                                                                                                                                                                                                                                                                                                                                                                                                                                                                                                                                                                                                                                                                                                                                                                                                                                                                                                                                                                                                                                                                                                                                                                                                                                                                                                                                                                                                                                                                                                                                                                                                                                                                                                                                                                                                                                                                                                                                                                                                                                                                                                                                                                                                                                                                                                                                                                                                                                                                                                                                                                                                                  | 157.4859                                                                          | 159.8912                                                                           |          |   |   |          |          |          |   |          |          |         |    |          |          |          |    |          |          |         |    |         |          |          |   |          |          |         |   |          |          |         |   |          |          |          |   |          |          |          |    |         |         |          |    |         |          |         |   |         |         |          |   |         |         |         |   |         |         |         |   |         |          |         |   |         |         |         |   |         |         |         |   |          |         |          |   |         |         |         |   |          |         |         |   |          |         |          |   |          |         |          |   |          |         |          |   |          |         |         |   |          |         |         |   |          |         |         |   |          |         |          |   |          |         |         |   |          |         |          |   |          |         |          |   |          |         |          |   |          |         |         |                                                                                                                                                                                                                                                                                                                                                                                                                                                                                                                                                                                                                                                                                                                                                                                                                                                                                                                                                                                                                                                                                                                                                                                                                                                                                                                                                                                                                                                                                                                                                                                                                                                                                                                                                                                                                                                                                                                                                                                                                                                                                                                                                                                                                                                                                                 |           |         |         |         |         |         |         |         |          |          |          |          |          |          |          |          |          |          |          |          |          |          |          |          |          |          |          |          |          |          |          |          |          |          |          |          |          |          |          |          |          |          |          |          |          |          |          |          |          |          |          |          |          |          |          |           |           |           |           |           |           |           |           |           |           |           |           |           |           |           |           |           |           |           |           |           |           |           |           |           |           |           |           |           |           |           |           |           |           |           |           |           |           |           |           |           |           |           |           |           |           |           |
| 176.1667                                                                                                                                                                                                                                                                                                                                                                                                                                                                                                                                                                                                                                                                                                                                                                                                                                                                                                                                                                                                                                                                                                                                                                                                                                                                                                                                                                                                                                                                                                                                                                                                                                                                                                                                                                                                                                                                                                                                                                                                                                                                                                                                                                                                                                                                                                                                                                                                                                                                                                                                                                                                                                                                                                                                                                                  | 187.0893                                                                          | 191.2638                                                                           |          |   |   |          |          |          |   |          |          |         |    |          |          |          |    |          |          |         |    |         |          |          |   |          |          |         |   |          |          |         |   |          |          |          |   |          |          |          |    |         |         |          |    |         |          |         |   |         |         |          |   |         |         |         |   |         |         |         |   |         |          |         |   |         |         |         |   |         |         |         |   |          |         |          |   |         |         |         |   |          |         |         |   |          |         |          |   |          |         |          |   |          |         |          |   |          |         |         |   |          |         |         |   |          |         |         |   |          |         |          |   |          |         |         |   |          |         |          |   |          |         |          |   |          |         |          |   |          |         |         |                                                                                                                                                                                                                                                                                                                                                                                                                                                                                                                                                                                                                                                                                                                                                                                                                                                                                                                                                                                                                                                                                                                                                                                                                                                                                                                                                                                                                                                                                                                                                                                                                                                                                                                                                                                                                                                                                                                                                                                                                                                                                                                                                                                                                                                                                                 |           |         |         |         |         |         |         |         |          |          |          |          |          |          |          |          |          |          |          |          |          |          |          |          |          |          |          |          |          |          |          |          |          |          |          |          |          |          |          |          |          |          |          |          |          |          |          |          |          |          |          |          |          |          |          |           |           |           |           |           |           |           |           |           |           |           |           |           |           |           |           |           |           |           |           |           |           |           |           |           |           |           |           |           |           |           |           |           |           |           |           |           |           |           |           |           |           |           |           |           |           |           |
| 194.5001                                                                                                                                                                                                                                                                                                                                                                                                                                                                                                                                                                                                                                                                                                                                                                                                                                                                                                                                                                                                                                                                                                                                                                                                                                                                                                                                                                                                                                                                                                                                                                                                                                                                                                                                                                                                                                                                                                                                                                                                                                                                                                                                                                                                                                                                                                                                                                                                                                                                                                                                                                                                                                                                                                                                                                                  | 206.7287                                                                          | 208.4639                                                                           |          |   |   |          |          |          |   |          |          |         |    |          |          |          |    |          |          |         |    |         |          |          |   |          |          |         |   |          |          |         |   |          |          |          |   |          |          |          |    |         |         |          |    |         |          |         |   |         |         |          |   |         |         |         |   |         |         |         |   |         |          |         |   |         |         |         |   |         |         |         |   |          |         |          |   |         |         |         |   |          |         |         |   |          |         |          |   |          |         |          |   |          |         |          |   |          |         |         |   |          |         |         |   |          |         |         |   |          |         |          |   |          |         |         |   |          |         |          |   |          |         |          |   |          |         |          |   |          |         |         |                                                                                                                                                                                                                                                                                                                                                                                                                                                                                                                                                                                                                                                                                                                                                                                                                                                                                                                                                                                                                                                                                                                                                                                                                                                                                                                                                                                                                                                                                                                                                                                                                                                                                                                                                                                                                                                                                                                                                                                                                                                                                                                                                                                                                                                                                                 |           |         |         |         |         |         |         |         |          |          |          |          |          |          |          |          |          |          |          |          |          |          |          |          |          |          |          |          |          |          |          |          |          |          |          |          |          |          |          |          |          |          |          |          |          |          |          |          |          |          |          |          |          |          |          |           |           |           |           |           |           |           |           |           |           |           |           |           |           |           |           |           |           |           |           |           |           |           |           |           |           |           |           |           |           |           |           |           |           |           |           |           |           |           |           |           |           |           |           |           |           |           |
| 238.3733                                                                                                                                                                                                                                                                                                                                                                                                                                                                                                                                                                                                                                                                                                                                                                                                                                                                                                                                                                                                                                                                                                                                                                                                                                                                                                                                                                                                                                                                                                                                                                                                                                                                                                                                                                                                                                                                                                                                                                                                                                                                                                                                                                                                                                                                                                                                                                                                                                                                                                                                                                                                                                                                                                                                                                                  | 249.0007                                                                          | 268.3628                                                                           |          |   |   |          |          |          |   |          |          |         |    |          |          |          |    |          |          |         |    |         |          |          |   |          |          |         |   |          |          |         |   |          |          |          |   |          |          |          |    |         |         |          |    |         |          |         |   |         |         |          |   |         |         |         |   |         |         |         |   |         |          |         |   |         |         |         |   |         |         |         |   |          |         |          |   |         |         |         |   |          |         |         |   |          |         |          |   |          |         |          |   |          |         |          |   |          |         |         |   |          |         |         |   |          |         |         |   |          |         |          |   |          |         |         |   |          |         |          |   |          |         |          |   |          |         |          |   |          |         |         |                                                                                                                                                                                                                                                                                                                                                                                                                                                                                                                                                                                                                                                                                                                                                                                                                                                                                                                                                                                                                                                                                                                                                                                                                                                                                                                                                                                                                                                                                                                                                                                                                                                                                                                                                                                                                                                                                                                                                                                                                                                                                                                                                                                                                                                                                                 |           |         |         |         |         |         |         |         |          |          |          |          |          |          |          |          |          |          |          |          |          |          |          |          |          |          |          |          |          |          |          |          |          |          |          |          |          |          |          |          |          |          |          |          |          |          |          |          |          |          |          |          |          |          |          |           |           |           |           |           |           |           |           |           |           |           |           |           |           |           |           |           |           |           |           |           |           |           |           |           |           |           |           |           |           |           |           |           |           |           |           |           |           |           |           |           |           |           |           |           |           |           |
| 291.6910                                                                                                                                                                                                                                                                                                                                                                                                                                                                                                                                                                                                                                                                                                                                                                                                                                                                                                                                                                                                                                                                                                                                                                                                                                                                                                                                                                                                                                                                                                                                                                                                                                                                                                                                                                                                                                                                                                                                                                                                                                                                                                                                                                                                                                                                                                                                                                                                                                                                                                                                                                                                                                                                                                                                                                                  | 296.3583                                                                          | 302.3637                                                                           |          |   |   |          |          |          |   |          |          |         |    |          |          |          |    |          |          |         |    |         |          |          |   |          |          |         |   |          |          |         |   |          |          |          |   |          |          |          |    |         |         |          |    |         |          |         |   |         |         |          |   |         |         |         |   |         |         |         |   |         |          |         |   |         |         |         |   |         |         |         |   |          |         |          |   |         |         |         |   |          |         |         |   |          |         |          |   |          |         |          |   |          |         |          |   |          |         |         |   |          |         |         |   |          |         |         |   |          |         |          |   |          |         |         |   |          |         |          |   |          |         |          |   |          |         |          |   |          |         |         |                                                                                                                                                                                                                                                                                                                                                                                                                                                                                                                                                                                                                                                                                                                                                                                                                                                                                                                                                                                                                                                                                                                                                                                                                                                                                                                                                                                                                                                                                                                                                                                                                                                                                                                                                                                                                                                                                                                                                                                                                                                                                                                                                                                                                                                                                                 |           |         |         |         |         |         |         |         |          |          |          |          |          |          |          |          |          |          |          |          |          |          |          |          |          |          |          |          |          |          |          |          |          |          |          |          |          |          |          |          |          |          |          |          |          |          |          |          |          |          |          |          |          |          |          |           |           |           |           |           |           |           |           |           |           |           |           |           |           |           |           |           |           |           |           |           |           |           |           |           |           |           |           |           |           |           |           |           |           |           |           |           |           |           |           |           |           |           |           |           |           |           |
| 307.9471                                                                                                                                                                                                                                                                                                                                                                                                                                                                                                                                                                                                                                                                                                                                                                                                                                                                                                                                                                                                                                                                                                                                                                                                                                                                                                                                                                                                                                                                                                                                                                                                                                                                                                                                                                                                                                                                                                                                                                                                                                                                                                                                                                                                                                                                                                                                                                                                                                                                                                                                                                                                                                                                                                                                                                                  | 311.4686                                                                          | 318.1956                                                                           |          |   |   |          |          |          |   |          |          |         |    |          |          |          |    |          |          |         |    |         |          |          |   |          |          |         |   |          |          |         |   |          |          |          |   |          |          |          |    |         |         |          |    |         |          |         |   |         |         |          |   |         |         |         |   |         |         |         |   |         |          |         |   |         |         |         |   |         |         |         |   |          |         |          |   |         |         |         |   |          |         |         |   |          |         |          |   |          |         |          |   |          |         |          |   |          |         |         |   |          |         |         |   |          |         |         |   |          |         |          |   |          |         |         |   |          |         |          |   |          |         |          |   |          |         |          |   |          |         |         |                                                                                                                                                                                                                                                                                                                                                                                                                                                                                                                                                                                                                                                                                                                                                                                                                                                                                                                                                                                                                                                                                                                                                                                                                                                                                                                                                                                                                                                                                                                                                                                                                                                                                                                                                                                                                                                                                                                                                                                                                                                                                                                                                                                                                                                                                                 |           |         |         |         |         |         |         |         |          |          |          |          |          |          |          |          |          |          |          |          |          |          |          |          |          |          |          |          |          |          |          |          |          |          |          |          |          |          |          |          |          |          |          |          |          |          |          |          |          |          |          |          |          |          |          |           |           |           |           |           |           |           |           |           |           |           |           |           |           |           |           |           |           |           |           |           |           |           |           |           |           |           |           |           |           |           |           |           |           |           |           |           |           |           |           |           |           |           |           |           |           |           |
| 324.7650                                                                                                                                                                                                                                                                                                                                                                                                                                                                                                                                                                                                                                                                                                                                                                                                                                                                                                                                                                                                                                                                                                                                                                                                                                                                                                                                                                                                                                                                                                                                                                                                                                                                                                                                                                                                                                                                                                                                                                                                                                                                                                                                                                                                                                                                                                                                                                                                                                                                                                                                                                                                                                                                                                                                                                                  | 337.9455                                                                          | 374.8475                                                                           |          |   |   |          |          |          |   |          |          |         |    |          |          |          |    |          |          |         |    |         |          |          |   |          |          |         |   |          |          |         |   |          |          |          |   |          |          |          |    |         |         |          |    |         |          |         |   |         |         |          |   |         |         |         |   |         |         |         |   |         |          |         |   |         |         |         |   |         |         |         |   |          |         |          |   |         |         |         |   |          |         |         |   |          |         |          |   |          |         |          |   |          |         |          |   |          |         |         |   |          |         |         |   |          |         |         |   |          |         |          |   |          |         |         |   |          |         |          |   |          |         |          |   |          |         |          |   |          |         |         |                                                                                                                                                                                                                                                                                                                                                                                                                                                                                                                                                                                                                                                                                                                                                                                                                                                                                                                                                                                                                                                                                                                                                                                                                                                                                                                                                                                                                                                                                                                                                                                                                                                                                                                                                                                                                                                                                                                                                                                                                                                                                                                                                                                                                                                                                                 |           |         |         |         |         |         |         |         |          |          |          |          |          |          |          |          |          |          |          |          |          |          |          |          |          |          |          |          |          |          |          |          |          |          |          |          |          |          |          |          |          |          |          |          |          |          |          |          |          |          |          |          |          |          |          |           |           |           |           |           |           |           |           |           |           |           |           |           |           |           |           |           |           |           |           |           |           |           |           |           |           |           |           |           |           |           |           |           |           |           |           |           |           |           |           |           |           |           |           |           |           |           |
| 380.4506                                                                                                                                                                                                                                                                                                                                                                                                                                                                                                                                                                                                                                                                                                                                                                                                                                                                                                                                                                                                                                                                                                                                                                                                                                                                                                                                                                                                                                                                                                                                                                                                                                                                                                                                                                                                                                                                                                                                                                                                                                                                                                                                                                                                                                                                                                                                                                                                                                                                                                                                                                                                                                                                                                                                                                                  | 419.4601                                                                          | 456.4855                                                                           |          |   |   |          |          |          |   |          |          |         |    |          |          |          |    |          |          |         |    |         |          |          |   |          |          |         |   |          |          |         |   |          |          |          |   |          |          |          |    |         |         |          |    |         |          |         |   |         |         |          |   |         |         |         |   |         |         |         |   |         |          |         |   |         |         |         |   |         |         |         |   |          |         |          |   |         |         |         |   |          |         |         |   |          |         |          |   |          |         |          |   |          |         |          |   |          |         |         |   |          |         |         |   |          |         |         |   |          |         |          |   |          |         |         |   |          |         |          |   |          |         |          |   |          |         |          |   |          |         |         |                                                                                                                                                                                                                                                                                                                                                                                                                                                                                                                                                                                                                                                                                                                                                                                                                                                                                                                                                                                                                                                                                                                                                                                                                                                                                                                                                                                                                                                                                                                                                                                                                                                                                                                                                                                                                                                                                                                                                                                                                                                                                                                                                                                                                                                                                                 |           |         |         |         |         |         |         |         |          |          |          |          |          |          |          |          |          |          |          |          |          |          |          |          |          |          |          |          |          |          |          |          |          |          |          |          |          |          |          |          |          |          |          |          |          |          |          |          |          |          |          |          |          |          |          |           |           |           |           |           |           |           |           |           |           |           |           |           |           |           |           |           |           |           |           |           |           |           |           |           |           |           |           |           |           |           |           |           |           |           |           |           |           |           |           |           |           |           |           |           |           |           |
| 458.3709                                                                                                                                                                                                                                                                                                                                                                                                                                                                                                                                                                                                                                                                                                                                                                                                                                                                                                                                                                                                                                                                                                                                                                                                                                                                                                                                                                                                                                                                                                                                                                                                                                                                                                                                                                                                                                                                                                                                                                                                                                                                                                                                                                                                                                                                                                                                                                                                                                                                                                                                                                                                                                                                                                                                                                                  | 492.9622                                                                          | 542.7891                                                                           |          |   |   |          |          |          |   |          |          |         |    |          |          |          |    |          |          |         |    |         |          |          |   |          |          |         |   |          |          |         |   |          |          |          |   |          |          |          |    |         |         |          |    |         |          |         |   |         |         |          |   |         |         |         |   |         |         |         |   |         |          |         |   |         |         |         |   |         |         |         |   |          |         |          |   |         |         |         |   |          |         |         |   |          |         |          |   |          |         |          |   |          |         |          |   |          |         |         |   |          |         |         |   |          |         |         |   |          |         |          |   |          |         |         |   |          |         |          |   |          |         |          |   |          |         |          |   |          |         |         |                                                                                                                                                                                                                                                                                                                                                                                                                                                                                                                                                                                                                                                                                                                                                                                                                                                                                                                                                                                                                                                                                                                                                                                                                                                                                                                                                                                                                                                                                                                                                                                                                                                                                                                                                                                                                                                                                                                                                                                                                                                                                                                                                                                                                                                                                                 |           |         |         |         |         |         |         |         |          |          |          |          |          |          |          |          |          |          |          |          |          |          |          |          |          |          |          |          |          |          |          |          |          |          |          |          |          |          |          |          |          |          |          |          |          |          |          |          |          |          |          |          |          |          |          |           |           |           |           |           |           |           |           |           |           |           |           |           |           |           |           |           |           |           |           |           |           |           |           |           |           |           |           |           |           |           |           |           |           |           |           |           |           |           |           |           |           |           |           |           |           |           |
| 630.4032                                                                                                                                                                                                                                                                                                                                                                                                                                                                                                                                                                                                                                                                                                                                                                                                                                                                                                                                                                                                                                                                                                                                                                                                                                                                                                                                                                                                                                                                                                                                                                                                                                                                                                                                                                                                                                                                                                                                                                                                                                                                                                                                                                                                                                                                                                                                                                                                                                                                                                                                                                                                                                                                                                                                                                                  | 696.4276                                                                          | 702.2962                                                                           |          |   |   |          |          |          |   |          |          |         |    |          |          |          |    |          |          |         |    |         |          |          |   |          |          |         |   |          |          |         |   |          |          |          |   |          |          |          |    |         |         |          |    |         |          |         |   |         |         |          |   |         |         |         |   |         |         |         |   |         |          |         |   |         |         |         |   |         |         |         |   |          |         |          |   |         |         |         |   |          |         |         |   |          |         |          |   |          |         |          |   |          |         |          |   |          |         |         |   |          |         |         |   |          |         |         |   |          |         |          |   |          |         |         |   |          |         |          |   |          |         |          |   |          |         |          |   |          |         |         |                                                                                                                                                                                                                                                                                                                                                                                                                                                                                                                                                                                                                                                                                                                                                                                                                                                                                                                                                                                                                                                                                                                                                                                                                                                                                                                                                                                                                                                                                                                                                                                                                                                                                                                                                                                                                                                                                                                                                                                                                                                                                                                                                                                                                                                                                                 |           |         |         |         |         |         |         |         |          |          |          |          |          |          |          |          |          |          |          |          |          |          |          |          |          |          |          |          |          |          |          |          |          |          |          |          |          |          |          |          |          |          |          |          |          |          |          |          |          |          |          |          |          |          |          |           |           |           |           |           |           |           |           |           |           |           |           |           |           |           |           |           |           |           |           |           |           |           |           |           |           |           |           |           |           |           |           |           |           |           |           |           |           |           |           |           |           |           |           |           |           |           |
| 725.3534                                                                                                                                                                                                                                                                                                                                                                                                                                                                                                                                                                                                                                                                                                                                                                                                                                                                                                                                                                                                                                                                                                                                                                                                                                                                                                                                                                                                                                                                                                                                                                                                                                                                                                                                                                                                                                                                                                                                                                                                                                                                                                                                                                                                                                                                                                                                                                                                                                                                                                                                                                                                                                                                                                                                                                                  | 756.9996                                                                          | 773.0830                                                                           |          |   |   |          |          |          |   |          |          |         |    |          |          |          |    |          |          |         |    |         |          |          |   |          |          |         |   |          |          |         |   |          |          |          |   |          |          |          |    |         |         |          |    |         |          |         |   |         |         |          |   |         |         |         |   |         |         |         |   |         |          |         |   |         |         |         |   |         |         |         |   |          |         |          |   |         |         |         |   |          |         |         |   |          |         |          |   |          |         |          |   |          |         |          |   |          |         |         |   |          |         |         |   |          |         |         |   |          |         |          |   |          |         |         |   |          |         |          |   |          |         |          |   |          |         |          |   |          |         |         |                                                                                                                                                                                                                                                                                                                                                                                                                                                                                                                                                                                                                                                                                                                                                                                                                                                                                                                                                                                                                                                                                                                                                                                                                                                                                                                                                                                                                                                                                                                                                                                                                                                                                                                                                                                                                                                                                                                                                                                                                                                                                                                                                                                                                                                                                                 |           |         |         |         |         |         |         |         |          |          |          |          |          |          |          |          |          |          |          |          |          |          |          |          |          |          |          |          |          |          |          |          |          |          |          |          |          |          |          |          |          |          |          |          |          |          |          |          |          |          |          |          |          |          |          |           |           |           |           |           |           |           |           |           |           |           |           |           |           |           |           |           |           |           |           |           |           |           |           |           |           |           |           |           |           |           |           |           |           |           |           |           |           |           |           |           |           |           |           |           |           |           |
| 799.7544                                                                                                                                                                                                                                                                                                                                                                                                                                                                                                                                                                                                                                                                                                                                                                                                                                                                                                                                                                                                                                                                                                                                                                                                                                                                                                                                                                                                                                                                                                                                                                                                                                                                                                                                                                                                                                                                                                                                                                                                                                                                                                                                                                                                                                                                                                                                                                                                                                                                                                                                                                                                                                                                                                                                                                                  | 817.6304                                                                          | 838.3438                                                                           |          |   |   |          |          |          |   |          |          |         |    |          |          |          |    |          |          |         |    |         |          |          |   |          |          |         |   |          |          |         |   |          |          |          |   |          |          |          |    |         |         |          |    |         |          |         |   |         |         |          |   |         |         |         |   |         |         |         |   |         |          |         |   |         |         |         |   |         |         |         |   |          |         |          |   |         |         |         |   |          |         |         |   |          |         |          |   |          |         |          |   |          |         |          |   |          |         |         |   |          |         |         |   |          |         |         |   |          |         |          |   |          |         |         |   |          |         |          |   |          |         |          |   |          |         |          |   |          |         |         |                                                                                                                                                                                                                                                                                                                                                                                                                                                                                                                                                                                                                                                                                                                                                                                                                                                                                                                                                                                                                                                                                                                                                                                                                                                                                                                                                                                                                                                                                                                                                                                                                                                                                                                                                                                                                                                                                                                                                                                                                                                                                                                                                                                                                                                                                                 |           |         |         |         |         |         |         |         |          |          |          |          |          |          |          |          |          |          |          |          |          |          |          |          |          |          |          |          |          |          |          |          |          |          |          |          |          |          |          |          |          |          |          |          |          |          |          |          |          |          |          |          |          |          |          |           |           |           |           |           |           |           |           |           |           |           |           |           |           |           |           |           |           |           |           |           |           |           |           |           |           |           |           |           |           |           |           |           |           |           |           |           |           |           |           |           |           |           |           |           |           |           |
| 840.5522                                                                                                                                                                                                                                                                                                                                                                                                                                                                                                                                                                                                                                                                                                                                                                                                                                                                                                                                                                                                                                                                                                                                                                                                                                                                                                                                                                                                                                                                                                                                                                                                                                                                                                                                                                                                                                                                                                                                                                                                                                                                                                                                                                                                                                                                                                                                                                                                                                                                                                                                                                                                                                                                                                                                                                                  | 889.5771                                                                          | 912.2144                                                                           |          |   |   |          |          |          |   |          |          |         |    |          |          |          |    |          |          |         |    |         |          |          |   |          |          |         |   |          |          |         |   |          |          |          |   |          |          |          |    |         |         |          |    |         |          |         |   |         |         |          |   |         |         |         |   |         |         |         |   |         |          |         |   |         |         |         |   |         |         |         |   |          |         |          |   |         |         |         |   |          |         |         |   |          |         |          |   |          |         |          |   |          |         |          |   |          |         |         |   |          |         |         |   |          |         |         |   |          |         |          |   |          |         |         |   |          |         |          |   |          |         |          |   |          |         |          |   |          |         |         |                                                                                                                                                                                                                                                                                                                                                                                                                                                                                                                                                                                                                                                                                                                                                                                                                                                                                                                                                                                                                                                                                                                                                                                                                                                                                                                                                                                                                                                                                                                                                                                                                                                                                                                                                                                                                                                                                                                                                                                                                                                                                                                                                                                                                                                                                                 |           |         |         |         |         |         |         |         |          |          |          |          |          |          |          |          |          |          |          |          |          |          |          |          |          |          |          |          |          |          |          |          |          |          |          |          |          |          |          |          |          |          |          |          |          |          |          |          |          |          |          |          |          |          |          |           |           |           |           |           |           |           |           |           |           |           |           |           |           |           |           |           |           |           |           |           |           |           |           |           |           |           |           |           |           |           |           |           |           |           |           |           |           |           |           |           |           |           |           |           |           |           |
| 933.1444                                                                                                                                                                                                                                                                                                                                                                                                                                                                                                                                                                                                                                                                                                                                                                                                                                                                                                                                                                                                                                                                                                                                                                                                                                                                                                                                                                                                                                                                                                                                                                                                                                                                                                                                                                                                                                                                                                                                                                                                                                                                                                                                                                                                                                                                                                                                                                                                                                                                                                                                                                                                                                                                                                                                                                                  | 939.1907                                                                          | 977.5562                                                                           |          |   |   |          |          |          |   |          |          |         |    |          |          |          |    |          |          |         |    |         |          |          |   |          |          |         |   |          |          |         |   |          |          |          |   |          |          |          |    |         |         |          |    |         |          |         |   |         |         |          |   |         |         |         |   |         |         |         |   |         |          |         |   |         |         |         |   |         |         |         |   |          |         |          |   |         |         |         |   |          |         |         |   |          |         |          |   |          |         |          |   |          |         |          |   |          |         |         |   |          |         |         |   |          |         |         |   |          |         |          |   |          |         |         |   |          |         |          |   |          |         |          |   |          |         |          |   |          |         |         |                                                                                                                                                                                                                                                                                                                                                                                                                                                                                                                                                                                                                                                                                                                                                                                                                                                                                                                                                                                                                                                                                                                                                                                                                                                                                                                                                                                                                                                                                                                                                                                                                                                                                                                                                                                                                                                                                                                                                                                                                                                                                                                                                                                                                                                                                                 |           |         |         |         |         |         |         |         |          |          |          |          |          |          |          |          |          |          |          |          |          |          |          |          |          |          |          |          |          |          |          |          |          |          |          |          |          |          |          |          |          |          |          |          |          |          |          |          |          |          |          |          |          |          |          |           |           |           |           |           |           |           |           |           |           |           |           |           |           |           |           |           |           |           |           |           |           |           |           |           |           |           |           |           |           |           |           |           |           |           |           |           |           |           |           |           |           |           |           |           |           |           |
| 994.7027                                                                                                                                                                                                                                                                                                                                                                                                                                                                                                                                                                                                                                                                                                                                                                                                                                                                                                                                                                                                                                                                                                                                                                                                                                                                                                                                                                                                                                                                                                                                                                                                                                                                                                                                                                                                                                                                                                                                                                                                                                                                                                                                                                                                                                                                                                                                                                                                                                                                                                                                                                                                                                                                                                                                                                                  | 1004.9527                                                                         | 1040.0517                                                                          |          |   |   |          |          |          |   |          |          |         |    |          |          |          |    |          |          |         |    |         |          |          |   |          |          |         |   |          |          |         |   |          |          |          |   |          |          |          |    |         |         |          |    |         |          |         |   |         |         |          |   |         |         |         |   |         |         |         |   |         |          |         |   |         |         |         |   |         |         |         |   |          |         |          |   |         |         |         |   |          |         |         |   |          |         |          |   |          |         |          |   |          |         |          |   |          |         |         |   |          |         |         |   |          |         |         |   |          |         |          |   |          |         |         |   |          |         |          |   |          |         |          |   |          |         |          |   |          |         |         |                                                                                                                                                                                                                                                                                                                                                                                                                                                                                                                                                                                                                                                                                                                                                                                                                                                                                                                                                                                                                                                                                                                                                                                                                                                                                                                                                                                                                                                                                                                                                                                                                                                                                                                                                                                                                                                                                                                                                                                                                                                                                                                                                                                                                                                                                                 |           |         |         |         |         |         |         |         |          |          |          |          |          |          |          |          |          |          |          |          |          |          |          |          |          |          |          |          |          |          |          |          |          |          |          |          |          |          |          |          |          |          |          |          |          |          |          |          |          |          |          |          |          |          |          |           |           |           |           |           |           |           |           |           |           |           |           |           |           |           |           |           |           |           |           |           |           |           |           |           |           |           |           |           |           |           |           |           |           |           |           |           |           |           |           |           |           |           |           |           |           |           |
| 1044.3435                                                                                                                                                                                                                                                                                                                                                                                                                                                                                                                                                                                                                                                                                                                                                                                                                                                                                                                                                                                                                                                                                                                                                                                                                                                                                                                                                                                                                                                                                                                                                                                                                                                                                                                                                                                                                                                                                                                                                                                                                                                                                                                                                                                                                                                                                                                                                                                                                                                                                                                                                                                                                                                                                                                                                                                 | 1048.5731                                                                         | 1051.5497                                                                          |          |   |   |          |          |          |   |          |          |         |    |          |          |          |    |          |          |         |    |         |          |          |   |          |          |         |   |          |          |         |   |          |          |          |   |          |          |          |    |         |         |          |    |         |          |         |   |         |         |          |   |         |         |         |   |         |         |         |   |         |          |         |   |         |         |         |   |         |         |         |   |          |         |          |   |         |         |         |   |          |         |         |   |          |         |          |   |          |         |          |   |          |         |          |   |          |         |         |   |          |         |         |   |          |         |         |   |          |         |          |   |          |         |         |   |          |         |          |   |          |         |          |   |          |         |          |   |          |         |         |                                                                                                                                                                                                                                                                                                                                                                                                                                                                                                                                                                                                                                                                                                                                                                                                                                                                                                                                                                                                                                                                                                                                                                                                                                                                                                                                                                                                                                                                                                                                                                                                                                                                                                                                                                                                                                                                                                                                                                                                                                                                                                                                                                                                                                                                                                 |           |         |         |         |         |         |         |         |          |          |          |          |          |          |          |          |          |          |          |          |          |          |          |          |          |          |          |          |          |          |          |          |          |          |          |          |          |          |          |          |          |          |          |          |          |          |          |          |          |          |          |          |          |          |          |           |           |           |           |           |           |           |           |           |           |           |           |           |           |           |           |           |           |           |           |           |           |           |           |           |           |           |           |           |           |           |           |           |           |           |           |           |           |           |           |           |           |           |           |           |           |           |
| 1056.3502                                                                                                                                                                                                                                                                                                                                                                                                                                                                                                                                                                                                                                                                                                                                                                                                                                                                                                                                                                                                                                                                                                                                                                                                                                                                                                                                                                                                                                                                                                                                                                                                                                                                                                                                                                                                                                                                                                                                                                                                                                                                                                                                                                                                                                                                                                                                                                                                                                                                                                                                                                                                                                                                                                                                                                                 | 1058.1606                                                                         | 1062.6235                                                                          |          |   |   |          |          |          |   |          |          |         |    |          |          |          |    |          |          |         |    |         |          |          |   |          |          |         |   |          |          |         |   |          |          |          |   |          |          |          |    |         |         |          |    |         |          |         |   |         |         |          |   |         |         |         |   |         |         |         |   |         |          |         |   |         |         |         |   |         |         |         |   |          |         |          |   |         |         |         |   |          |         |         |   |          |         |          |   |          |         |          |   |          |         |          |   |          |         |         |   |          |         |         |   |          |         |         |   |          |         |          |   |          |         |         |   |          |         |          |   |          |         |          |   |          |         |          |   |          |         |         |                                                                                                                                                                                                                                                                                                                                                                                                                                                                                                                                                                                                                                                                                                                                                                                                                                                                                                                                                                                                                                                                                                                                                                                                                                                                                                                                                                                                                                                                                                                                                                                                                                                                                                                                                                                                                                                                                                                                                                                                                                                                                                                                                                                                                                                                                                 |           |         |         |         |         |         |         |         |          |          |          |          |          |          |          |          |          |          |          |          |          |          |          |          |          |          |          |          |          |          |          |          |          |          |          |          |          |          |          |          |          |          |          |          |          |          |          |          |          |          |          |          |          |          |          |           |           |           |           |           |           |           |           |           |           |           |           |           |           |           |           |           |           |           |           |           |           |           |           |           |           |           |           |           |           |           |           |           |           |           |           |           |           |           |           |           |           |           |           |           |           |           |
| 1067.4453                                                                                                                                                                                                                                                                                                                                                                                                                                                                                                                                                                                                                                                                                                                                                                                                                                                                                                                                                                                                                                                                                                                                                                                                                                                                                                                                                                                                                                                                                                                                                                                                                                                                                                                                                                                                                                                                                                                                                                                                                                                                                                                                                                                                                                                                                                                                                                                                                                                                                                                                                                                                                                                                                                                                                                                 | 1122.7167                                                                         | 1131.2440                                                                          |          |   |   |          |          |          |   |          |          |         |    |          |          |          |    |          |          |         |    |         |          |          |   |          |          |         |   |          |          |         |   |          |          |          |   |          |          |          |    |         |         |          |    |         |          |         |   |         |         |          |   |         |         |         |   |         |         |         |   |         |          |         |   |         |         |         |   |         |         |         |   |          |         |          |   |         |         |         |   |          |         |         |   |          |         |          |   |          |         |          |   |          |         |          |   |          |         |         |   |          |         |         |   |          |         |         |   |          |         |          |   |          |         |         |   |          |         |          |   |          |         |          |   |          |         |          |   |          |         |         |                                                                                                                                                                                                                                                                                                                                                                                                                                                                                                                                                                                                                                                                                                                                                                                                                                                                                                                                                                                                                                                                                                                                                                                                                                                                                                                                                                                                                                                                                                                                                                                                                                                                                                                                                                                                                                                                                                                                                                                                                                                                                                                                                                                                                                                                                                 |           |         |         |         |         |         |         |         |          |          |          |          |          |          |          |          |          |          |          |          |          |          |          |          |          |          |          |          |          |          |          |          |          |          |          |          |          |          |          |          |          |          |          |          |          |          |          |          |          |          |          |          |          |          |          |           |           |           |           |           |           |           |           |           |           |           |           |           |           |           |           |           |           |           |           |           |           |           |           |           |           |           |           |           |           |           |           |           |           |           |           |           |           |           |           |           |           |           |           |           |           |           |
| 1167.7354                                                                                                                                                                                                                                                                                                                                                                                                                                                                                                                                                                                                                                                                                                                                                                                                                                                                                                                                                                                                                                                                                                                                                                                                                                                                                                                                                                                                                                                                                                                                                                                                                                                                                                                                                                                                                                                                                                                                                                                                                                                                                                                                                                                                                                                                                                                                                                                                                                                                                                                                                                                                                                                                                                                                                                                 | 1191.2222                                                                         | 1231.2797                                                                          |          |   |   |          |          |          |   |          |          |         |    |          |          |          |    |          |          |         |    |         |          |          |   |          |          |         |   |          |          |         |   |          |          |          |   |          |          |          |    |         |         |          |    |         |          |         |   |         |         |          |   |         |         |         |   |         |         |         |   |         |          |         |   |         |         |         |   |         |         |         |   |          |         |          |   |         |         |         |   |          |         |         |   |          |         |          |   |          |         |          |   |          |         |          |   |          |         |         |   |          |         |         |   |          |         |         |   |          |         |          |   |          |         |         |   |          |         |          |   |          |         |          |   |          |         |          |   |          |         |         |                                                                                                                                                                                                                                                                                                                                                                                                                                                                                                                                                                                                                                                                                                                                                                                                                                                                                                                                                                                                                                                                                                                                                                                                                                                                                                                                                                                                                                                                                                                                                                                                                                                                                                                                                                                                                                                                                                                                                                                                                                                                                                                                                                                                                                                                                                 |           |         |         |         |         |         |         |         |          |          |          |          |          |          |          |          |          |          |          |          |          |          |          |          |          |          |          |          |          |          |          |          |          |          |          |          |          |          |          |          |          |          |          |          |          |          |          |          |          |          |          |          |          |          |          |           |           |           |           |           |           |           |           |           |           |           |           |           |           |           |           |           |           |           |           |           |           |           |           |           |           |           |           |           |           |           |           |           |           |           |           |           |           |           |           |           |           |           |           |           |           |           |
| 1233.7731                                                                                                                                                                                                                                                                                                                                                                                                                                                                                                                                                                                                                                                                                                                                                                                                                                                                                                                                                                                                                                                                                                                                                                                                                                                                                                                                                                                                                                                                                                                                                                                                                                                                                                                                                                                                                                                                                                                                                                                                                                                                                                                                                                                                                                                                                                                                                                                                                                                                                                                                                                                                                                                                                                                                                                                 | 1235.1049                                                                         | 1259.4714                                                                          |          |   |   |          |          |          |   |          |          |         |    |          |          |          |    |          |          |         |    |         |          |          |   |          |          |         |   |          |          |         |   |          |          |          |   |          |          |          |    |         |         |          |    |         |          |         |   |         |         |          |   |         |         |         |   |         |         |         |   |         |          |         |   |         |         |         |   |         |         |         |   |          |         |          |   |         |         |         |   |          |         |         |   |          |         |          |   |          |         |          |   |          |         |          |   |          |         |         |   |          |         |         |   |          |         |         |   |          |         |          |   |          |         |         |   |          |         |          |   |          |         |          |   |          |         |          |   |          |         |         |                                                                                                                                                                                                                                                                                                                                                                                                                                                                                                                                                                                                                                                                                                                                                                                                                                                                                                                                                                                                                                                                                                                                                                                                                                                                                                                                                                                                                                                                                                                                                                                                                                                                                                                                                                                                                                                                                                                                                                                                                                                                                                                                                                                                                                                                                                 |           |         |         |         |         |         |         |         |          |          |          |          |          |          |          |          |          |          |          |          |          |          |          |          |          |          |          |          |          |          |          |          |          |          |          |          |          |          |          |          |          |          |          |          |          |          |          |          |          |          |          |          |          |          |          |           |           |           |           |           |           |           |           |           |           |           |           |           |           |           |           |           |           |           |           |           |           |           |           |           |           |           |           |           |           |           |           |           |           |           |           |           |           |           |           |           |           |           |           |           |           |           |
| 1290.3170                                                                                                                                                                                                                                                                                                                                                                                                                                                                                                                                                                                                                                                                                                                                                                                                                                                                                                                                                                                                                                                                                                                                                                                                                                                                                                                                                                                                                                                                                                                                                                                                                                                                                                                                                                                                                                                                                                                                                                                                                                                                                                                                                                                                                                                                                                                                                                                                                                                                                                                                                                                                                                                                                                                                                                                 | 1303.3819                                                                         | 1325.6434                                                                          |          |   |   |          |          |          |   |          |          |         |    |          |          |          |    |          |          |         |    |         |          |          |   |          |          |         |   |          |          |         |   |          |          |          |   |          |          |          |    |         |         |          |    |         |          |         |   |         |         |          |   |         |         |         |   |         |         |         |   |         |          |         |   |         |         |         |   |         |         |         |   |          |         |          |   |         |         |         |   |          |         |         |   |          |         |          |   |          |         |          |   |          |         |          |   |          |         |         |   |          |         |         |   |          |         |         |   |          |         |          |   |          |         |         |   |          |         |          |   |          |         |          |   |          |         |          |   |          |         |         |                                                                                                                                                                                                                                                                                                                                                                                                                                                                                                                                                                                                                                                                                                                                                                                                                                                                                                                                                                                                                                                                                                                                                                                                                                                                                                                                                                                                                                                                                                                                                                                                                                                                                                                                                                                                                                                                                                                                                                                                                                                                                                                                                                                                                                                                                                 |           |         |         |         |         |         |         |         |          |          |          |          |          |          |          |          |          |          |          |          |          |          |          |          |          |          |          |          |          |          |          |          |          |          |          |          |          |          |          |          |          |          |          |          |          |          |          |          |          |          |          |          |          |          |          |           |           |           |           |           |           |           |           |           |           |           |           |           |           |           |           |           |           |           |           |           |           |           |           |           |           |           |           |           |           |           |           |           |           |           |           |           |           |           |           |           |           |           |           |           |           |           |
| 1339.0310                                                                                                                                                                                                                                                                                                                                                                                                                                                                                                                                                                                                                                                                                                                                                                                                                                                                                                                                                                                                                                                                                                                                                                                                                                                                                                                                                                                                                                                                                                                                                                                                                                                                                                                                                                                                                                                                                                                                                                                                                                                                                                                                                                                                                                                                                                                                                                                                                                                                                                                                                                                                                                                                                                                                                                                 | 1344.9300                                                                         | 1366.4521                                                                          |          |   |   |          |          |          |   |          |          |         |    |          |          |          |    |          |          |         |    |         |          |          |   |          |          |         |   |          |          |         |   |          |          |          |   |          |          |          |    |         |         |          |    |         |          |         |   |         |         |          |   |         |         |         |   |         |         |         |   |         |          |         |   |         |         |         |   |         |         |         |   |          |         |          |   |         |         |         |   |          |         |         |   |          |         |          |   |          |         |          |   |          |         |          |   |          |         |         |   |          |         |         |   |          |         |         |   |          |         |          |   |          |         |         |   |          |         |          |   |          |         |          |   |          |         |          |   |          |         |         |                                                                                                                                                                                                                                                                                                                                                                                                                                                                                                                                                                                                                                                                                                                                                                                                                                                                                                                                                                                                                                                                                                                                                                                                                                                                                                                                                                                                                                                                                                                                                                                                                                                                                                                                                                                                                                                                                                                                                                                                                                                                                                                                                                                                                                                                                                 |           |         |         |         |         |         |         |         |          |          |          |          |          |          |          |          |          |          |          |          |          |          |          |          |          |          |          |          |          |          |          |          |          |          |          |          |          |          |          |          |          |          |          |          |          |          |          |          |          |          |          |          |          |          |          |           |           |           |           |           |           |           |           |           |           |           |           |           |           |           |           |           |           |           |           |           |           |           |           |           |           |           |           |           |           |           |           |           |           |           |           |           |           |           |           |           |           |           |           |           |           |           |
| 1383.7494                                                                                                                                                                                                                                                                                                                                                                                                                                                                                                                                                                                                                                                                                                                                                                                                                                                                                                                                                                                                                                                                                                                                                                                                                                                                                                                                                                                                                                                                                                                                                                                                                                                                                                                                                                                                                                                                                                                                                                                                                                                                                                                                                                                                                                                                                                                                                                                                                                                                                                                                                                                                                                                                                                                                                                                 | 1393.3622                                                                         | 1455.1768                                                                          |          |   |   |          |          |          |   |          |          |         |    |          |          |          |    |          |          |         |    |         |          |          |   |          |          |         |   |          |          |         |   |          |          |          |   |          |          |          |    |         |         |          |    |         |          |         |   |         |         |          |   |         |         |         |   |         |         |         |   |         |          |         |   |         |         |         |   |         |         |         |   |          |         |          |   |         |         |         |   |          |         |         |   |          |         |          |   |          |         |          |   |          |         |          |   |          |         |         |   |          |         |         |   |          |         |         |   |          |         |          |   |          |         |         |   |          |         |          |   |          |         |          |   |          |         |          |   |          |         |         |                                                                                                                                                                                                                                                                                                                                                                                                                                                                                                                                                                                                                                                                                                                                                                                                                                                                                                                                                                                                                                                                                                                                                                                                                                                                                                                                                                                                                                                                                                                                                                                                                                                                                                                                                                                                                                                                                                                                                                                                                                                                                                                                                                                                                                                                                                 |           |         |         |         |         |         |         |         |          |          |          |          |          |          |          |          |          |          |          |          |          |          |          |          |          |          |          |          |          |          |          |          |          |          |          |          |          |          |          |          |          |          |          |          |          |          |          |          |          |          |          |          |          |          |          |           |           |           |           |           |           |           |           |           |           |           |           |           |           |           |           |           |           |           |           |           |           |           |           |           |           |           |           |           |           |           |           |           |           |           |           |           |           |           |           |           |           |           |           |           |           |           |
| 1463.2623                                                                                                                                                                                                                                                                                                                                                                                                                                                                                                                                                                                                                                                                                                                                                                                                                                                                                                                                                                                                                                                                                                                                                                                                                                                                                                                                                                                                                                                                                                                                                                                                                                                                                                                                                                                                                                                                                                                                                                                                                                                                                                                                                                                                                                                                                                                                                                                                                                                                                                                                                                                                                                                                                                                                                                                 | 1473.0226                                                                         | 1502.2272                                                                          |          |   |   |          |          |          |   |          |          |         |    |          |          |          |    |          |          |         |    |         |          |          |   |          |          |         |   |          |          |         |   |          |          |          |   |          |          |          |    |         |         |          |    |         |          |         |   |         |         |          |   |         |         |         |   |         |         |         |   |         |          |         |   |         |         |         |   |         |         |         |   |          |         |          |   |         |         |         |   |          |         |         |   |          |         |          |   |          |         |          |   |          |         |          |   |          |         |         |   |          |         |         |   |          |         |         |   |          |         |          |   |          |         |         |   |          |         |          |   |          |         |          |   |          |         |          |   |          |         |         |                                                                                                                                                                                                                                                                                                                                                                                                                                                                                                                                                                                                                                                                                                                                                                                                                                                                                                                                                                                                                                                                                                                                                                                                                                                                                                                                                                                                                                                                                                                                                                                                                                                                                                                                                                                                                                                                                                                                                                                                                                                                                                                                                                                                                                                                                                 |           |         |         |         |         |         |         |         |          |          |          |          |          |          |          |          |          |          |          |          |          |          |          |          |          |          |          |          |          |          |          |          |          |          |          |          |          |          |          |          |          |          |          |          |          |          |          |          |          |          |          |          |          |          |          |           |           |           |           |           |           |           |           |           |           |           |           |           |           |           |           |           |           |           |           |           |           |           |           |           |           |           |           |           |           |           |           |           |           |           |           |           |           |           |           |           |           |           |           |           |           |           |
| 1522.1700                                                                                                                                                                                                                                                                                                                                                                                                                                                                                                                                                                                                                                                                                                                                                                                                                                                                                                                                                                                                                                                                                                                                                                                                                                                                                                                                                                                                                                                                                                                                                                                                                                                                                                                                                                                                                                                                                                                                                                                                                                                                                                                                                                                                                                                                                                                                                                                                                                                                                                                                                                                                                                                                                                                                                                                 | 1551.3769                                                                         | 1603.4351                                                                          |          |   |   |          |          |          |   |          |          |         |    |          |          |          |    |          |          |         |    |         |          |          |   |          |          |         |   |          |          |         |   |          |          |          |   |          |          |          |    |         |         |          |    |         |          |         |   |         |         |          |   |         |         |         |   |         |         |         |   |         |          |         |   |         |         |         |   |         |         |         |   |          |         |          |   |         |         |         |   |          |         |         |   |          |         |          |   |          |         |          |   |          |         |          |   |          |         |         |   |          |         |         |   |          |         |         |   |          |         |          |   |          |         |         |   |          |         |          |   |          |         |          |   |          |         |          |   |          |         |         |                                                                                                                                                                                                                                                                                                                                                                                                                                                                                                                                                                                                                                                                                                                                                                                                                                                                                                                                                                                                                                                                                                                                                                                                                                                                                                                                                                                                                                                                                                                                                                                                                                                                                                                                                                                                                                                                                                                                                                                                                                                                                                                                                                                                                                                                                                 |           |         |         |         |         |         |         |         |          |          |          |          |          |          |          |          |          |          |          |          |          |          |          |          |          |          |          |          |          |          |          |          |          |          |          |          |          |          |          |          |          |          |          |          |          |          |          |          |          |          |          |          |          |          |          |           |           |           |           |           |           |           |           |           |           |           |           |           |           |           |           |           |           |           |           |           |           |           |           |           |           |           |           |           |           |           |           |           |           |           |           |           |           |           |           |           |           |           |           |           |           |           |
| 1653.1635                                                                                                                                                                                                                                                                                                                                                                                                                                                                                                                                                                                                                                                                                                                                                                                                                                                                                                                                                                                                                                                                                                                                                                                                                                                                                                                                                                                                                                                                                                                                                                                                                                                                                                                                                                                                                                                                                                                                                                                                                                                                                                                                                                                                                                                                                                                                                                                                                                                                                                                                                                                                                                                                                                                                                                                 | 2275.0332                                                                         | 2334.4920                                                                          |          |   |   |          |          |          |   |          |          |         |    |          |          |          |    |          |          |         |    |         |          |          |   |          |          |         |   |          |          |         |   |          |          |          |   |          |          |          |    |         |         |          |    |         |          |         |   |         |         |          |   |         |         |         |   |         |         |         |   |         |          |         |   |         |         |         |   |         |         |         |   |          |         |          |   |         |         |         |   |          |         |         |   |          |         |          |   |          |         |          |   |          |         |          |   |          |         |         |   |          |         |         |   |          |         |         |   |          |         |          |   |          |         |         |   |          |         |          |   |          |         |          |   |          |         |          |   |          |         |         |                                                                                                                                                                                                                                                                                                                                                                                                                                                                                                                                                                                                                                                                                                                                                                                                                                                                                                                                                                                                                                                                                                                                                                                                                                                                                                                                                                                                                                                                                                                                                                                                                                                                                                                                                                                                                                                                                                                                                                                                                                                                                                                                                                                                                                                                                                 |           |         |         |         |         |         |         |         |          |          |          |          |          |          |          |          |          |          |          |          |          |          |          |          |          |          |          |          |          |          |          |          |          |          |          |          |          |          |          |          |          |          |          |          |          |          |          |          |          |          |          |          |          |          |          |           |           |           |           |           |           |           |           |           |           |           |           |           |           |           |           |           |           |           |           |           |           |           |           |           |           |           |           |           |           |           |           |           |           |           |           |           |           |           |           |           |           |           |           |           |           |           |
| 2363.6460                                                                                                                                                                                                                                                                                                                                                                                                                                                                                                                                                                                                                                                                                                                                                                                                                                                                                                                                                                                                                                                                                                                                                                                                                                                                                                                                                                                                                                                                                                                                                                                                                                                                                                                                                                                                                                                                                                                                                                                                                                                                                                                                                                                                                                                                                                                                                                                                                                                                                                                                                                                                                                                                                                                                                                                 | 3060.3886                                                                         | 3085.4588                                                                          |          |   |   |          |          |          |   |          |          |         |    |          |          |          |    |          |          |         |    |         |          |          |   |          |          |         |   |          |          |         |   |          |          |          |   |          |          |          |    |         |         |          |    |         |          |         |   |         |         |          |   |         |         |         |   |         |         |         |   |         |          |         |   |         |         |         |   |         |         |         |   |          |         |          |   |         |         |         |   |          |         |         |   |          |         |          |   |          |         |          |   |          |         |          |   |          |         |         |   |          |         |         |   |          |         |         |   |          |         |          |   |          |         |         |   |          |         |          |   |          |         |          |   |          |         |          |   |          |         |         |                                                                                                                                                                                                                                                                                                                                                                                                                                                                                                                                                                                                                                                                                                                                                                                                                                                                                                                                                                                                                                                                                                                                                                                                                                                                                                                                                                                                                                                                                                                                                                                                                                                                                                                                                                                                                                                                                                                                                                                                                                                                                                                                                                                                                                                                                                 |           |         |         |         |         |         |         |         |          |          |          |          |          |          |          |          |          |          |          |          |          |          |          |          |          |          |          |          |          |          |          |          |          |          |          |          |          |          |          |          |          |          |          |          |          |          |          |          |          |          |          |          |          |          |          |           |           |           |           |           |           |           |           |           |           |           |           |           |           |           |           |           |           |           |           |           |           |           |           |           |           |           |           |           |           |           |           |           |           |           |           |           |           |           |           |           |           |           |           |           |           |           |
| 3110.8426                                                                                                                                                                                                                                                                                                                                                                                                                                                                                                                                                                                                                                                                                                                                                                                                                                                                                                                                                                                                                                                                                                                                                                                                                                                                                                                                                                                                                                                                                                                                                                                                                                                                                                                                                                                                                                                                                                                                                                                                                                                                                                                                                                                                                                                                                                                                                                                                                                                                                                                                                                                                                                                                                                                                                                                 | 3116.8067                                                                         | 3146.0831                                                                          |          |   |   |          |          |          |   |          |          |         |    |          |          |          |    |          |          |         |    |         |          |          |   |          |          |         |   |          |          |         |   |          |          |          |   |          |          |          |    |         |         |          |    |         |          |         |   |         |         |          |   |         |         |         |   |         |         |         |   |         |          |         |   |         |         |         |   |         |         |         |   |          |         |          |   |         |         |         |   |          |         |         |   |          |         |          |   |          |         |          |   |          |         |          |   |          |         |         |   |          |         |         |   |          |         |         |   |          |         |          |   |          |         |         |   |          |         |          |   |          |         |          |   |          |         |          |   |          |         |         |                                                                                                                                                                                                                                                                                                                                                                                                                                                                                                                                                                                                                                                                                                                                                                                                                                                                                                                                                                                                                                                                                                                                                                                                                                                                                                                                                                                                                                                                                                                                                                                                                                                                                                                                                                                                                                                                                                                                                                                                                                                                                                                                                                                                                                                                                                 |           |         |         |         |         |         |         |         |          |          |          |          |          |          |          |          |          |          |          |          |          |          |          |          |          |          |          |          |          |          |          |          |          |          |          |          |          |          |          |          |          |          |          |          |          |          |          |          |          |          |          |          |          |          |          |           |           |           |           |           |           |           |           |           |           |           |           |           |           |           |           |           |           |           |           |           |           |           |           |           |           |           |           |           |           |           |           |           |           |           |           |           |           |           |           |           |           |           |           |           |           |           |
| 3166.8677                                                                                                                                                                                                                                                                                                                                                                                                                                                                                                                                                                                                                                                                                                                                                                                                                                                                                                                                                                                                                                                                                                                                                                                                                                                                                                                                                                                                                                                                                                                                                                                                                                                                                                                                                                                                                                                                                                                                                                                                                                                                                                                                                                                                                                                                                                                                                                                                                                                                                                                                                                                                                                                                                                                                                                                 | 3174.0620                                                                         | 3179.0022                                                                          |          |   |   |          |          |          |   |          |          |         |    |          |          |          |    |          |          |         |    |         |          |          |   |          |          |         |   |          |          |         |   |          |          |          |   |          |          |          |    |         |         |          |    |         |          |         |   |         |         |          |   |         |         |         |   |         |         |         |   |         |          |         |   |         |         |         |   |         |         |         |   |          |         |          |   |         |         |         |   |          |         |         |   |          |         |          |   |          |         |          |   |          |         |          |   |          |         |         |   |          |         |         |   |          |         |         |   |          |         |          |   |          |         |         |   |          |         |          |   |          |         |          |   |          |         |          |   |          |         |         |                                                                                                                                                                                                                                                                                                                                                                                                                                                                                                                                                                                                                                                                                                                                                                                                                                                                                                                                                                                                                                                                                                                                                                                                                                                                                                                                                                                                                                                                                                                                                                                                                                                                                                                                                                                                                                                                                                                                                                                                                                                                                                                                                                                                                                                                                                 |           |         |         |         |         |         |         |         |          |          |          |          |          |          |          |          |          |          |          |          |          |          |          |          |          |          |          |          |          |          |          |          |          |          |          |          |          |          |          |          |          |          |          |          |          |          |          |          |          |          |          |          |          |          |          |           |           |           |           |           |           |           |           |           |           |           |           |           |           |           |           |           |           |           |           |           |           |           |           |           |           |           |           |           |           |           |           |           |           |           |           |           |           |           |           |           |           |           |           |           |           |           |
| 3179.1355                                                                                                                                                                                                                                                                                                                                                                                                                                                                                                                                                                                                                                                                                                                                                                                                                                                                                                                                                                                                                                                                                                                                                                                                                                                                                                                                                                                                                                                                                                                                                                                                                                                                                                                                                                                                                                                                                                                                                                                                                                                                                                                                                                                                                                                                                                                                                                                                                                                                                                                                                                                                                                                                                                                                                                                 | 3179.5601                                                                         | 3185.5557                                                                          |          |   |   |          |          |          |   |          |          |         |    |          |          |          |    |          |          |         |    |         |          |          |   |          |          |         |   |          |          |         |   |          |          |          |   |          |          |          |    |         |         |          |    |         |          |         |   |         |         |          |   |         |         |         |   |         |         |         |   |         |          |         |   |         |         |         |   |         |         |         |   |          |         |          |   |         |         |         |   |          |         |         |   |          |         |          |   |          |         |          |   |          |         |          |   |          |         |         |   |          |         |         |   |          |         |         |   |          |         |          |   |          |         |         |   |          |         |          |   |          |         |          |   |          |         |          |   |          |         |         |                                                                                                                                                                                                                                                                                                                                                                                                                                                                                                                                                                                                                                                                                                                                                                                                                                                                                                                                                                                                                                                                                                                                                                                                                                                                                                                                                                                                                                                                                                                                                                                                                                                                                                                                                                                                                                                                                                                                                                                                                                                                                                                                                                                                                                                                                                 |           |         |         |         |         |         |         |         |          |          |          |          |          |          |          |          |          |          |          |          |          |          |          |          |          |          |          |          |          |          |          |          |          |          |          |          |          |          |          |          |          |          |          |          |          |          |          |          |          |          |          |          |          |          |          |           |           |           |           |           |           |           |           |           |           |           |           |           |           |           |           |           |           |           |           |           |           |           |           |           |           |           |           |           |           |           |           |           |           |           |           |           |           |           |           |           |           |           |           |           |           |           |

|    |          |          |          |           |           |           |
|----|----------|----------|----------|-----------|-----------|-----------|
| H  | 0.67739  | 2.73488  | -1.11016 | 3206.6360 | 3231.8646 | 3270.4063 |
| H  | -0.40367 | -0.66865 | 2.64544  | 3277.5727 | 3285.9601 | 3294.7307 |
| H  | 1.61882  | 0.59926  | 3.31633  |           |           |           |
| H  | -0.56105 | 1.57585  | 3.52372  |           |           |           |
| Si | 0.27014  | 0.63336  | 2.74306  |           |           |           |
| Ni | 2.43626  | -0.24099 | -0.27020 |           |           |           |

**Statistical Thermodynamic Analysis**

Temperature=298.15 K

Pressure=1 atm

Zero-point correction= 0.285423

Electronic Energy = -2886.64732484

Internal Energy (E)= -2886.33702184

Enthalpy (H)= -2886.33607684

Gibbs Free Energy (G)=-2886.41707484

Gibbs Free Energy of Solvation=-2886.43573934

| St.Pt.            | General Structure                                                                                                                                                                                                                                                                                                                                                                                                                                                                                                                                                                                                                                                                                                                                                                                                                                                                                                                                                                                                                                                                                                                                                                                                                                                                                                                                                                                                                                                                                                                                                                                                                                                                                                                                                                                                                                                                                                                                                                                                                                                                                                                                                                                                                                                                                                                                                                                                                                                                                                                                                                         | Ball & Stick model |          |   |   |   |          |          |          |   |          |          |         |    |          |          |          |    |          |          |         |    |         |          |          |   |          |          |         |   |          |          |         |   |          |          |          |   |          |          |          |    |         |         |          |    |         |          |         |   |         |         |          |   |         |          |          |   |         |         |         |   |         |          |          |   |         |         |         |   |         |         |         |   |          |         |          |   |         |         |         |   |          |         |         |   |          |         |          |   |          |         |          |   |          |         |          |   |          |         |         |   |          |         |         |   |          |         |         |   |          |         |         |   |          |         |         |   |          |         |         |   |          |         |          |   |          |         |         |   |          |         |         |   |         |         |          |                                                                                                                                                                                                                                                                                                                                                                                                                                                                                                                                                                                                                                                                                                                                                                                                                                                                                                                                                                                                                                                                                                                                                                                                                                                                                                                                                                                                                                                                                                                                                                                                                                                                                                                                                                                                                                                                                                                                                                                                                                                                                                                                                                                                                                                                                                                                                                                                                                              |         |         |         |         |         |         |         |          |          |          |          |          |          |          |          |          |          |          |          |          |          |          |          |          |          |          |          |          |          |          |          |          |          |          |          |          |          |          |          |          |          |          |          |          |          |          |          |          |          |          |          |          |          |          |           |           |           |           |           |           |           |           |           |           |           |           |           |           |           |           |           |           |           |           |           |           |           |           |           |           |           |           |           |           |           |           |           |           |           |           |           |           |           |           |           |           |           |           |           |           |           |           |           |           |           |           |           |           |
|-------------------|-------------------------------------------------------------------------------------------------------------------------------------------------------------------------------------------------------------------------------------------------------------------------------------------------------------------------------------------------------------------------------------------------------------------------------------------------------------------------------------------------------------------------------------------------------------------------------------------------------------------------------------------------------------------------------------------------------------------------------------------------------------------------------------------------------------------------------------------------------------------------------------------------------------------------------------------------------------------------------------------------------------------------------------------------------------------------------------------------------------------------------------------------------------------------------------------------------------------------------------------------------------------------------------------------------------------------------------------------------------------------------------------------------------------------------------------------------------------------------------------------------------------------------------------------------------------------------------------------------------------------------------------------------------------------------------------------------------------------------------------------------------------------------------------------------------------------------------------------------------------------------------------------------------------------------------------------------------------------------------------------------------------------------------------------------------------------------------------------------------------------------------------------------------------------------------------------------------------------------------------------------------------------------------------------------------------------------------------------------------------------------------------------------------------------------------------------------------------------------------------------------------------------------------------------------------------------------------------|--------------------|----------|---|---|---|----------|----------|----------|---|----------|----------|---------|----|----------|----------|----------|----|----------|----------|---------|----|---------|----------|----------|---|----------|----------|---------|---|----------|----------|---------|---|----------|----------|----------|---|----------|----------|----------|----|---------|---------|----------|----|---------|----------|---------|---|---------|---------|----------|---|---------|----------|----------|---|---------|---------|---------|---|---------|----------|----------|---|---------|---------|---------|---|---------|---------|---------|---|----------|---------|----------|---|---------|---------|---------|---|----------|---------|---------|---|----------|---------|----------|---|----------|---------|----------|---|----------|---------|----------|---|----------|---------|---------|---|----------|---------|---------|---|----------|---------|---------|---|----------|---------|---------|---|----------|---------|---------|---|----------|---------|---------|---|----------|---------|----------|---|----------|---------|---------|---|----------|---------|---------|---|---------|---------|----------|----------------------------------------------------------------------------------------------------------------------------------------------------------------------------------------------------------------------------------------------------------------------------------------------------------------------------------------------------------------------------------------------------------------------------------------------------------------------------------------------------------------------------------------------------------------------------------------------------------------------------------------------------------------------------------------------------------------------------------------------------------------------------------------------------------------------------------------------------------------------------------------------------------------------------------------------------------------------------------------------------------------------------------------------------------------------------------------------------------------------------------------------------------------------------------------------------------------------------------------------------------------------------------------------------------------------------------------------------------------------------------------------------------------------------------------------------------------------------------------------------------------------------------------------------------------------------------------------------------------------------------------------------------------------------------------------------------------------------------------------------------------------------------------------------------------------------------------------------------------------------------------------------------------------------------------------------------------------------------------------------------------------------------------------------------------------------------------------------------------------------------------------------------------------------------------------------------------------------------------------------------------------------------------------------------------------------------------------------------------------------------------------------------------------------------------------|---------|---------|---------|---------|---------|---------|---------|----------|----------|----------|----------|----------|----------|----------|----------|----------|----------|----------|----------|----------|----------|----------|----------|----------|----------|----------|----------|----------|----------|----------|----------|----------|----------|----------|----------|----------|----------|----------|----------|----------|----------|----------|----------|----------|----------|----------|----------|----------|----------|----------|----------|----------|----------|----------|-----------|-----------|-----------|-----------|-----------|-----------|-----------|-----------|-----------|-----------|-----------|-----------|-----------|-----------|-----------|-----------|-----------|-----------|-----------|-----------|-----------|-----------|-----------|-----------|-----------|-----------|-----------|-----------|-----------|-----------|-----------|-----------|-----------|-----------|-----------|-----------|-----------|-----------|-----------|-----------|-----------|-----------|-----------|-----------|-----------|-----------|-----------|-----------|-----------|-----------|-----------|-----------|-----------|-----------|
| 2NiI <sub>2</sub> |                                                                                                                                                                                                                                                                                                                                                                                                                                                                                                                                                                                                                                                                                                                                                                                                                                                                                                                                                                                                                                                                                                                                                                                                                                                                                                                                                                                                                                                                                                                                                                                                                                                                                                                                                                                                                                                                                                                                                                                                                                                                                                                                                                                                                                                                                                                                                                                                                                                                                                                                                                                           |                    |          |   |   |   |          |          |          |   |          |          |         |    |          |          |          |    |          |          |         |    |         |          |          |   |          |          |         |   |          |          |         |   |          |          |          |   |          |          |          |    |         |         |          |    |         |          |         |   |         |         |          |   |         |          |          |   |         |         |         |   |         |          |          |   |         |         |         |   |         |         |         |   |          |         |          |   |         |         |         |   |          |         |         |   |          |         |          |   |          |         |          |   |          |         |          |   |          |         |         |   |          |         |         |   |          |         |         |   |          |         |         |   |          |         |         |   |          |         |         |   |          |         |          |   |          |         |         |   |          |         |         |   |         |         |          |                                                                                                                                                                                                                                                                                                                                                                                                                                                                                                                                                                                                                                                                                                                                                                                                                                                                                                                                                                                                                                                                                                                                                                                                                                                                                                                                                                                                                                                                                                                                                                                                                                                                                                                                                                                                                                                                                                                                                                                                                                                                                                                                                                                                                                                                                                                                                                                                                                              |         |         |         |         |         |         |         |          |          |          |          |          |          |          |          |          |          |          |          |          |          |          |          |          |          |          |          |          |          |          |          |          |          |          |          |          |          |          |          |          |          |          |          |          |          |          |          |          |          |          |          |          |          |          |           |           |           |           |           |           |           |           |           |           |           |           |           |           |           |           |           |           |           |           |           |           |           |           |           |           |           |           |           |           |           |           |           |           |           |           |           |           |           |           |           |           |           |           |           |           |           |           |           |           |           |           |           |           |
|                   | <p style="text-align: center;"><b><u>Cartesian co-ordinate</u></b></p> <table border="1"> <thead> <tr> <th>Atoms</th> <th>X</th> <th>Y</th> <th>Z</th> </tr> </thead> <tbody> <tr><td>C</td><td>-1.42440</td><td>-3.05919</td><td>-0.06044</td></tr> <tr><td>C</td><td>-1.08307</td><td>-2.54036</td><td>1.13433</td></tr> <tr><td>Pt</td><td>-1.40272</td><td>-0.52525</td><td>-0.49589</td></tr> <tr><td>Cl</td><td>-3.65640</td><td>-0.50085</td><td>0.11628</td></tr> <tr><td>Cl</td><td>0.74290</td><td>-0.81384</td><td>-1.57603</td></tr> <tr><td>H</td><td>-0.03533</td><td>-2.44170</td><td>1.40651</td></tr> <tr><td>H</td><td>-1.84420</td><td>-2.27176</td><td>1.86294</td></tr> <tr><td>H</td><td>-2.46428</td><td>-3.22811</td><td>-0.32761</td></tr> <tr><td>H</td><td>-0.65709</td><td>-3.38081</td><td>-0.75998</td></tr> <tr><td>Cl</td><td>2.67892</td><td>1.80303</td><td>-1.53775</td></tr> <tr><td>Cl</td><td>2.46179</td><td>-1.89174</td><td>0.96918</td></tr> <tr><td>H</td><td>5.05777</td><td>0.40589</td><td>-1.15659</td></tr> <tr><td>C</td><td>4.82946</td><td>-0.08311</td><td>-0.21448</td></tr> <tr><td>C</td><td>4.36895</td><td>0.62818</td><td>0.84089</td></tr> <tr><td>H</td><td>5.01813</td><td>-1.14878</td><td>-0.12099</td></tr> <tr><td>H</td><td>4.20498</td><td>0.14007</td><td>1.79597</td></tr> <tr><td>H</td><td>4.23079</td><td>1.70250</td><td>0.76834</td></tr> <tr><td>C</td><td>-0.78122</td><td>2.13174</td><td>-0.47951</td></tr> <tr><td>O</td><td>0.45606</td><td>0.85882</td><td>1.23159</td></tr> <tr><td>C</td><td>-0.73857</td><td>1.20743</td><td>0.73523</td></tr> <tr><td>C</td><td>-1.53282</td><td>1.23989</td><td>-1.47761</td></tr> <tr><td>H</td><td>-2.58491</td><td>1.49998</td><td>-1.60035</td></tr> <tr><td>H</td><td>-1.02207</td><td>1.12380</td><td>-2.43310</td></tr> <tr><td>C</td><td>-1.82877</td><td>1.64324</td><td>1.71341</td></tr> <tr><td>H</td><td>-2.40342</td><td>0.82233</td><td>2.14501</td></tr> <tr><td>C</td><td>-2.65358</td><td>2.68026</td><td>0.94201</td></tr> <tr><td>H</td><td>-3.44687</td><td>2.18331</td><td>0.37895</td></tr> <tr><td>H</td><td>-3.11877</td><td>3.40241</td><td>1.61583</td></tr> <tr><td>C</td><td>-1.62034</td><td>3.32202</td><td>0.00043</td></tr> <tr><td>H</td><td>-2.07477</td><td>3.85547</td><td>-0.83856</td></tr> <tr><td>H</td><td>-0.98901</td><td>4.02885</td><td>0.55058</td></tr> <tr><td>H</td><td>-1.29417</td><td>2.15556</td><td>2.52279</td></tr> <tr><td>H</td><td>0.22857</td><td>2.36488</td><td>-0.82421</td></tr> </tbody> </table> | Atoms              | X        | Y | Z | C | -1.42440 | -3.05919 | -0.06044 | C | -1.08307 | -2.54036 | 1.13433 | Pt | -1.40272 | -0.52525 | -0.49589 | Cl | -3.65640 | -0.50085 | 0.11628 | Cl | 0.74290 | -0.81384 | -1.57603 | H | -0.03533 | -2.44170 | 1.40651 | H | -1.84420 | -2.27176 | 1.86294 | H | -2.46428 | -3.22811 | -0.32761 | H | -0.65709 | -3.38081 | -0.75998 | Cl | 2.67892 | 1.80303 | -1.53775 | Cl | 2.46179 | -1.89174 | 0.96918 | H | 5.05777 | 0.40589 | -1.15659 | C | 4.82946 | -0.08311 | -0.21448 | C | 4.36895 | 0.62818 | 0.84089 | H | 5.01813 | -1.14878 | -0.12099 | H | 4.20498 | 0.14007 | 1.79597 | H | 4.23079 | 1.70250 | 0.76834 | C | -0.78122 | 2.13174 | -0.47951 | O | 0.45606 | 0.85882 | 1.23159 | C | -0.73857 | 1.20743 | 0.73523 | C | -1.53282 | 1.23989 | -1.47761 | H | -2.58491 | 1.49998 | -1.60035 | H | -1.02207 | 1.12380 | -2.43310 | C | -1.82877 | 1.64324 | 1.71341 | H | -2.40342 | 0.82233 | 2.14501 | C | -2.65358 | 2.68026 | 0.94201 | H | -3.44687 | 2.18331 | 0.37895 | H | -3.11877 | 3.40241 | 1.61583 | C | -1.62034 | 3.32202 | 0.00043 | H | -2.07477 | 3.85547 | -0.83856 | H | -0.98901 | 4.02885 | 0.55058 | H | -1.29417 | 2.15556 | 2.52279 | H | 0.22857 | 2.36488 | -0.82421 | <p style="text-align: center;"><b><u>Frequencies</u></b></p> <table border="1"> <tbody> <tr><td>22.1471</td><td>41.1865</td><td>53.9921</td></tr> <tr><td>65.7895</td><td>73.6227</td><td>80.9747</td></tr> <tr><td>93.1152</td><td>104.6790</td><td>106.7081</td></tr> <tr><td>117.0771</td><td>131.6877</td><td>141.1578</td></tr> <tr><td>151.6215</td><td>157.9176</td><td>162.8508</td></tr> <tr><td>167.0023</td><td>168.9846</td><td>181.3951</td></tr> <tr><td>190.6675</td><td>194.7787</td><td>207.9561</td></tr> <tr><td>223.8587</td><td>235.0827</td><td>257.7737</td></tr> <tr><td>261.5426</td><td>273.6724</td><td>281.5196</td></tr> <tr><td>297.2082</td><td>307.3270</td><td>311.0070</td></tr> <tr><td>325.5623</td><td>336.3071</td><td>354.7714</td></tr> <tr><td>378.5370</td><td>419.2703</td><td>421.7480</td></tr> <tr><td>463.5170</td><td>506.1900</td><td>542.5134</td></tr> <tr><td>598.1826</td><td>661.2053</td><td>707.7977</td></tr> <tr><td>731.5667</td><td>778.7552</td><td>816.4061</td></tr> <tr><td>844.3239</td><td>846.0107</td><td>847.0710</td></tr> <tr><td>864.4592</td><td>878.3872</td><td>925.9442</td></tr> <tr><td>931.1219</td><td>958.0147</td><td>985.3494</td></tr> <tr><td>1000.6043</td><td>1016.6222</td><td>1029.9746</td></tr> <tr><td>1042.9700</td><td>1045.4536</td><td>1048.6198</td></tr> <tr><td>1057.7256</td><td>1063.4635</td><td>1072.0772</td></tr> <tr><td>1086.7668</td><td>1107.0907</td><td>1161.4795</td></tr> <tr><td>1183.4392</td><td>1199.1290</td><td>1218.9225</td></tr> <tr><td>1246.4760</td><td>1248.6889</td><td>1260.4984</td></tr> <tr><td>1279.8136</td><td>1316.6057</td><td>1331.6988</td></tr> <tr><td>1339.2932</td><td>1363.9496</td><td>1371.0256</td></tr> <tr><td>1377.0615</td><td>1407.7258</td><td>1456.8020</td></tr> <tr><td>1463.9925</td><td>1465.5823</td><td>1476.4074</td></tr> <tr><td>1499.2886</td><td>1522.2142</td><td>1656.4082</td></tr> <tr><td>1672.9839</td><td>2270.8461</td><td>2322.1365</td></tr> <tr><td>2369.3371</td><td>3081.0449</td><td>3088.9160</td></tr> <tr><td>3120.0753</td><td>3124.2243</td><td>3146.0422</td></tr> <tr><td>3153.9497</td><td>3154.2942</td><td>3165.3651</td></tr> <tr><td>3168.2760</td><td>3177.4667</td><td>3179.0734</td></tr> <tr><td>3191.6037</td><td>3205.8801</td><td>3255.2679</td></tr> <tr><td>3273.7456</td><td>3279.5012</td><td>3300.5087</td></tr> </tbody> </table> | 22.1471 | 41.1865 | 53.9921 | 65.7895 | 73.6227 | 80.9747 | 93.1152 | 104.6790 | 106.7081 | 117.0771 | 131.6877 | 141.1578 | 151.6215 | 157.9176 | 162.8508 | 167.0023 | 168.9846 | 181.3951 | 190.6675 | 194.7787 | 207.9561 | 223.8587 | 235.0827 | 257.7737 | 261.5426 | 273.6724 | 281.5196 | 297.2082 | 307.3270 | 311.0070 | 325.5623 | 336.3071 | 354.7714 | 378.5370 | 419.2703 | 421.7480 | 463.5170 | 506.1900 | 542.5134 | 598.1826 | 661.2053 | 707.7977 | 731.5667 | 778.7552 | 816.4061 | 844.3239 | 846.0107 | 847.0710 | 864.4592 | 878.3872 | 925.9442 | 931.1219 | 958.0147 | 985.3494 | 1000.6043 | 1016.6222 | 1029.9746 | 1042.9700 | 1045.4536 | 1048.6198 | 1057.7256 | 1063.4635 | 1072.0772 | 1086.7668 | 1107.0907 | 1161.4795 | 1183.4392 | 1199.1290 | 1218.9225 | 1246.4760 | 1248.6889 | 1260.4984 | 1279.8136 | 1316.6057 | 1331.6988 | 1339.2932 | 1363.9496 | 1371.0256 | 1377.0615 | 1407.7258 | 1456.8020 | 1463.9925 | 1465.5823 | 1476.4074 | 1499.2886 | 1522.2142 | 1656.4082 | 1672.9839 | 2270.8461 | 2322.1365 | 2369.3371 | 3081.0449 | 3088.9160 | 3120.0753 | 3124.2243 | 3146.0422 | 3153.9497 | 3154.2942 | 3165.3651 | 3168.2760 | 3177.4667 | 3179.0734 | 3191.6037 | 3205.8801 | 3255.2679 | 3273.7456 | 3279.5012 | 3300.5087 |
| Atoms             | X                                                                                                                                                                                                                                                                                                                                                                                                                                                                                                                                                                                                                                                                                                                                                                                                                                                                                                                                                                                                                                                                                                                                                                                                                                                                                                                                                                                                                                                                                                                                                                                                                                                                                                                                                                                                                                                                                                                                                                                                                                                                                                                                                                                                                                                                                                                                                                                                                                                                                                                                                                                         | Y                  | Z        |   |   |   |          |          |          |   |          |          |         |    |          |          |          |    |          |          |         |    |         |          |          |   |          |          |         |   |          |          |         |   |          |          |          |   |          |          |          |    |         |         |          |    |         |          |         |   |         |         |          |   |         |          |          |   |         |         |         |   |         |          |          |   |         |         |         |   |         |         |         |   |          |         |          |   |         |         |         |   |          |         |         |   |          |         |          |   |          |         |          |   |          |         |          |   |          |         |         |   |          |         |         |   |          |         |         |   |          |         |         |   |          |         |         |   |          |         |         |   |          |         |          |   |          |         |         |   |          |         |         |   |         |         |          |                                                                                                                                                                                                                                                                                                                                                                                                                                                                                                                                                                                                                                                                                                                                                                                                                                                                                                                                                                                                                                                                                                                                                                                                                                                                                                                                                                                                                                                                                                                                                                                                                                                                                                                                                                                                                                                                                                                                                                                                                                                                                                                                                                                                                                                                                                                                                                                                                                              |         |         |         |         |         |         |         |          |          |          |          |          |          |          |          |          |          |          |          |          |          |          |          |          |          |          |          |          |          |          |          |          |          |          |          |          |          |          |          |          |          |          |          |          |          |          |          |          |          |          |          |          |          |          |           |           |           |           |           |           |           |           |           |           |           |           |           |           |           |           |           |           |           |           |           |           |           |           |           |           |           |           |           |           |           |           |           |           |           |           |           |           |           |           |           |           |           |           |           |           |           |           |           |           |           |           |           |           |
| C                 | -1.42440                                                                                                                                                                                                                                                                                                                                                                                                                                                                                                                                                                                                                                                                                                                                                                                                                                                                                                                                                                                                                                                                                                                                                                                                                                                                                                                                                                                                                                                                                                                                                                                                                                                                                                                                                                                                                                                                                                                                                                                                                                                                                                                                                                                                                                                                                                                                                                                                                                                                                                                                                                                  | -3.05919           | -0.06044 |   |   |   |          |          |          |   |          |          |         |    |          |          |          |    |          |          |         |    |         |          |          |   |          |          |         |   |          |          |         |   |          |          |          |   |          |          |          |    |         |         |          |    |         |          |         |   |         |         |          |   |         |          |          |   |         |         |         |   |         |          |          |   |         |         |         |   |         |         |         |   |          |         |          |   |         |         |         |   |          |         |         |   |          |         |          |   |          |         |          |   |          |         |          |   |          |         |         |   |          |         |         |   |          |         |         |   |          |         |         |   |          |         |         |   |          |         |         |   |          |         |          |   |          |         |         |   |          |         |         |   |         |         |          |                                                                                                                                                                                                                                                                                                                                                                                                                                                                                                                                                                                                                                                                                                                                                                                                                                                                                                                                                                                                                                                                                                                                                                                                                                                                                                                                                                                                                                                                                                                                                                                                                                                                                                                                                                                                                                                                                                                                                                                                                                                                                                                                                                                                                                                                                                                                                                                                                                              |         |         |         |         |         |         |         |          |          |          |          |          |          |          |          |          |          |          |          |          |          |          |          |          |          |          |          |          |          |          |          |          |          |          |          |          |          |          |          |          |          |          |          |          |          |          |          |          |          |          |          |          |          |          |           |           |           |           |           |           |           |           |           |           |           |           |           |           |           |           |           |           |           |           |           |           |           |           |           |           |           |           |           |           |           |           |           |           |           |           |           |           |           |           |           |           |           |           |           |           |           |           |           |           |           |           |           |           |
| C                 | -1.08307                                                                                                                                                                                                                                                                                                                                                                                                                                                                                                                                                                                                                                                                                                                                                                                                                                                                                                                                                                                                                                                                                                                                                                                                                                                                                                                                                                                                                                                                                                                                                                                                                                                                                                                                                                                                                                                                                                                                                                                                                                                                                                                                                                                                                                                                                                                                                                                                                                                                                                                                                                                  | -2.54036           | 1.13433  |   |   |   |          |          |          |   |          |          |         |    |          |          |          |    |          |          |         |    |         |          |          |   |          |          |         |   |          |          |         |   |          |          |          |   |          |          |          |    |         |         |          |    |         |          |         |   |         |         |          |   |         |          |          |   |         |         |         |   |         |          |          |   |         |         |         |   |         |         |         |   |          |         |          |   |         |         |         |   |          |         |         |   |          |         |          |   |          |         |          |   |          |         |          |   |          |         |         |   |          |         |         |   |          |         |         |   |          |         |         |   |          |         |         |   |          |         |         |   |          |         |          |   |          |         |         |   |          |         |         |   |         |         |          |                                                                                                                                                                                                                                                                                                                                                                                                                                                                                                                                                                                                                                                                                                                                                                                                                                                                                                                                                                                                                                                                                                                                                                                                                                                                                                                                                                                                                                                                                                                                                                                                                                                                                                                                                                                                                                                                                                                                                                                                                                                                                                                                                                                                                                                                                                                                                                                                                                              |         |         |         |         |         |         |         |          |          |          |          |          |          |          |          |          |          |          |          |          |          |          |          |          |          |          |          |          |          |          |          |          |          |          |          |          |          |          |          |          |          |          |          |          |          |          |          |          |          |          |          |          |          |          |           |           |           |           |           |           |           |           |           |           |           |           |           |           |           |           |           |           |           |           |           |           |           |           |           |           |           |           |           |           |           |           |           |           |           |           |           |           |           |           |           |           |           |           |           |           |           |           |           |           |           |           |           |           |
| Pt                | -1.40272                                                                                                                                                                                                                                                                                                                                                                                                                                                                                                                                                                                                                                                                                                                                                                                                                                                                                                                                                                                                                                                                                                                                                                                                                                                                                                                                                                                                                                                                                                                                                                                                                                                                                                                                                                                                                                                                                                                                                                                                                                                                                                                                                                                                                                                                                                                                                                                                                                                                                                                                                                                  | -0.52525           | -0.49589 |   |   |   |          |          |          |   |          |          |         |    |          |          |          |    |          |          |         |    |         |          |          |   |          |          |         |   |          |          |         |   |          |          |          |   |          |          |          |    |         |         |          |    |         |          |         |   |         |         |          |   |         |          |          |   |         |         |         |   |         |          |          |   |         |         |         |   |         |         |         |   |          |         |          |   |         |         |         |   |          |         |         |   |          |         |          |   |          |         |          |   |          |         |          |   |          |         |         |   |          |         |         |   |          |         |         |   |          |         |         |   |          |         |         |   |          |         |         |   |          |         |          |   |          |         |         |   |          |         |         |   |         |         |          |                                                                                                                                                                                                                                                                                                                                                                                                                                                                                                                                                                                                                                                                                                                                                                                                                                                                                                                                                                                                                                                                                                                                                                                                                                                                                                                                                                                                                                                                                                                                                                                                                                                                                                                                                                                                                                                                                                                                                                                                                                                                                                                                                                                                                                                                                                                                                                                                                                              |         |         |         |         |         |         |         |          |          |          |          |          |          |          |          |          |          |          |          |          |          |          |          |          |          |          |          |          |          |          |          |          |          |          |          |          |          |          |          |          |          |          |          |          |          |          |          |          |          |          |          |          |          |          |           |           |           |           |           |           |           |           |           |           |           |           |           |           |           |           |           |           |           |           |           |           |           |           |           |           |           |           |           |           |           |           |           |           |           |           |           |           |           |           |           |           |           |           |           |           |           |           |           |           |           |           |           |           |
| Cl                | -3.65640                                                                                                                                                                                                                                                                                                                                                                                                                                                                                                                                                                                                                                                                                                                                                                                                                                                                                                                                                                                                                                                                                                                                                                                                                                                                                                                                                                                                                                                                                                                                                                                                                                                                                                                                                                                                                                                                                                                                                                                                                                                                                                                                                                                                                                                                                                                                                                                                                                                                                                                                                                                  | -0.50085           | 0.11628  |   |   |   |          |          |          |   |          |          |         |    |          |          |          |    |          |          |         |    |         |          |          |   |          |          |         |   |          |          |         |   |          |          |          |   |          |          |          |    |         |         |          |    |         |          |         |   |         |         |          |   |         |          |          |   |         |         |         |   |         |          |          |   |         |         |         |   |         |         |         |   |          |         |          |   |         |         |         |   |          |         |         |   |          |         |          |   |          |         |          |   |          |         |          |   |          |         |         |   |          |         |         |   |          |         |         |   |          |         |         |   |          |         |         |   |          |         |         |   |          |         |          |   |          |         |         |   |          |         |         |   |         |         |          |                                                                                                                                                                                                                                                                                                                                                                                                                                                                                                                                                                                                                                                                                                                                                                                                                                                                                                                                                                                                                                                                                                                                                                                                                                                                                                                                                                                                                                                                                                                                                                                                                                                                                                                                                                                                                                                                                                                                                                                                                                                                                                                                                                                                                                                                                                                                                                                                                                              |         |         |         |         |         |         |         |          |          |          |          |          |          |          |          |          |          |          |          |          |          |          |          |          |          |          |          |          |          |          |          |          |          |          |          |          |          |          |          |          |          |          |          |          |          |          |          |          |          |          |          |          |          |          |           |           |           |           |           |           |           |           |           |           |           |           |           |           |           |           |           |           |           |           |           |           |           |           |           |           |           |           |           |           |           |           |           |           |           |           |           |           |           |           |           |           |           |           |           |           |           |           |           |           |           |           |           |           |
| Cl                | 0.74290                                                                                                                                                                                                                                                                                                                                                                                                                                                                                                                                                                                                                                                                                                                                                                                                                                                                                                                                                                                                                                                                                                                                                                                                                                                                                                                                                                                                                                                                                                                                                                                                                                                                                                                                                                                                                                                                                                                                                                                                                                                                                                                                                                                                                                                                                                                                                                                                                                                                                                                                                                                   | -0.81384           | -1.57603 |   |   |   |          |          |          |   |          |          |         |    |          |          |          |    |          |          |         |    |         |          |          |   |          |          |         |   |          |          |         |   |          |          |          |   |          |          |          |    |         |         |          |    |         |          |         |   |         |         |          |   |         |          |          |   |         |         |         |   |         |          |          |   |         |         |         |   |         |         |         |   |          |         |          |   |         |         |         |   |          |         |         |   |          |         |          |   |          |         |          |   |          |         |          |   |          |         |         |   |          |         |         |   |          |         |         |   |          |         |         |   |          |         |         |   |          |         |         |   |          |         |          |   |          |         |         |   |          |         |         |   |         |         |          |                                                                                                                                                                                                                                                                                                                                                                                                                                                                                                                                                                                                                                                                                                                                                                                                                                                                                                                                                                                                                                                                                                                                                                                                                                                                                                                                                                                                                                                                                                                                                                                                                                                                                                                                                                                                                                                                                                                                                                                                                                                                                                                                                                                                                                                                                                                                                                                                                                              |         |         |         |         |         |         |         |          |          |          |          |          |          |          |          |          |          |          |          |          |          |          |          |          |          |          |          |          |          |          |          |          |          |          |          |          |          |          |          |          |          |          |          |          |          |          |          |          |          |          |          |          |          |          |           |           |           |           |           |           |           |           |           |           |           |           |           |           |           |           |           |           |           |           |           |           |           |           |           |           |           |           |           |           |           |           |           |           |           |           |           |           |           |           |           |           |           |           |           |           |           |           |           |           |           |           |           |           |
| H                 | -0.03533                                                                                                                                                                                                                                                                                                                                                                                                                                                                                                                                                                                                                                                                                                                                                                                                                                                                                                                                                                                                                                                                                                                                                                                                                                                                                                                                                                                                                                                                                                                                                                                                                                                                                                                                                                                                                                                                                                                                                                                                                                                                                                                                                                                                                                                                                                                                                                                                                                                                                                                                                                                  | -2.44170           | 1.40651  |   |   |   |          |          |          |   |          |          |         |    |          |          |          |    |          |          |         |    |         |          |          |   |          |          |         |   |          |          |         |   |          |          |          |   |          |          |          |    |         |         |          |    |         |          |         |   |         |         |          |   |         |          |          |   |         |         |         |   |         |          |          |   |         |         |         |   |         |         |         |   |          |         |          |   |         |         |         |   |          |         |         |   |          |         |          |   |          |         |          |   |          |         |          |   |          |         |         |   |          |         |         |   |          |         |         |   |          |         |         |   |          |         |         |   |          |         |         |   |          |         |          |   |          |         |         |   |          |         |         |   |         |         |          |                                                                                                                                                                                                                                                                                                                                                                                                                                                                                                                                                                                                                                                                                                                                                                                                                                                                                                                                                                                                                                                                                                                                                                                                                                                                                                                                                                                                                                                                                                                                                                                                                                                                                                                                                                                                                                                                                                                                                                                                                                                                                                                                                                                                                                                                                                                                                                                                                                              |         |         |         |         |         |         |         |          |          |          |          |          |          |          |          |          |          |          |          |          |          |          |          |          |          |          |          |          |          |          |          |          |          |          |          |          |          |          |          |          |          |          |          |          |          |          |          |          |          |          |          |          |          |          |           |           |           |           |           |           |           |           |           |           |           |           |           |           |           |           |           |           |           |           |           |           |           |           |           |           |           |           |           |           |           |           |           |           |           |           |           |           |           |           |           |           |           |           |           |           |           |           |           |           |           |           |           |           |
| H                 | -1.84420                                                                                                                                                                                                                                                                                                                                                                                                                                                                                                                                                                                                                                                                                                                                                                                                                                                                                                                                                                                                                                                                                                                                                                                                                                                                                                                                                                                                                                                                                                                                                                                                                                                                                                                                                                                                                                                                                                                                                                                                                                                                                                                                                                                                                                                                                                                                                                                                                                                                                                                                                                                  | -2.27176           | 1.86294  |   |   |   |          |          |          |   |          |          |         |    |          |          |          |    |          |          |         |    |         |          |          |   |          |          |         |   |          |          |         |   |          |          |          |   |          |          |          |    |         |         |          |    |         |          |         |   |         |         |          |   |         |          |          |   |         |         |         |   |         |          |          |   |         |         |         |   |         |         |         |   |          |         |          |   |         |         |         |   |          |         |         |   |          |         |          |   |          |         |          |   |          |         |          |   |          |         |         |   |          |         |         |   |          |         |         |   |          |         |         |   |          |         |         |   |          |         |         |   |          |         |          |   |          |         |         |   |          |         |         |   |         |         |          |                                                                                                                                                                                                                                                                                                                                                                                                                                                                                                                                                                                                                                                                                                                                                                                                                                                                                                                                                                                                                                                                                                                                                                                                                                                                                                                                                                                                                                                                                                                                                                                                                                                                                                                                                                                                                                                                                                                                                                                                                                                                                                                                                                                                                                                                                                                                                                                                                                              |         |         |         |         |         |         |         |          |          |          |          |          |          |          |          |          |          |          |          |          |          |          |          |          |          |          |          |          |          |          |          |          |          |          |          |          |          |          |          |          |          |          |          |          |          |          |          |          |          |          |          |          |          |          |           |           |           |           |           |           |           |           |           |           |           |           |           |           |           |           |           |           |           |           |           |           |           |           |           |           |           |           |           |           |           |           |           |           |           |           |           |           |           |           |           |           |           |           |           |           |           |           |           |           |           |           |           |           |
| H                 | -2.46428                                                                                                                                                                                                                                                                                                                                                                                                                                                                                                                                                                                                                                                                                                                                                                                                                                                                                                                                                                                                                                                                                                                                                                                                                                                                                                                                                                                                                                                                                                                                                                                                                                                                                                                                                                                                                                                                                                                                                                                                                                                                                                                                                                                                                                                                                                                                                                                                                                                                                                                                                                                  | -3.22811           | -0.32761 |   |   |   |          |          |          |   |          |          |         |    |          |          |          |    |          |          |         |    |         |          |          |   |          |          |         |   |          |          |         |   |          |          |          |   |          |          |          |    |         |         |          |    |         |          |         |   |         |         |          |   |         |          |          |   |         |         |         |   |         |          |          |   |         |         |         |   |         |         |         |   |          |         |          |   |         |         |         |   |          |         |         |   |          |         |          |   |          |         |          |   |          |         |          |   |          |         |         |   |          |         |         |   |          |         |         |   |          |         |         |   |          |         |         |   |          |         |         |   |          |         |          |   |          |         |         |   |          |         |         |   |         |         |          |                                                                                                                                                                                                                                                                                                                                                                                                                                                                                                                                                                                                                                                                                                                                                                                                                                                                                                                                                                                                                                                                                                                                                                                                                                                                                                                                                                                                                                                                                                                                                                                                                                                                                                                                                                                                                                                                                                                                                                                                                                                                                                                                                                                                                                                                                                                                                                                                                                              |         |         |         |         |         |         |         |          |          |          |          |          |          |          |          |          |          |          |          |          |          |          |          |          |          |          |          |          |          |          |          |          |          |          |          |          |          |          |          |          |          |          |          |          |          |          |          |          |          |          |          |          |          |          |           |           |           |           |           |           |           |           |           |           |           |           |           |           |           |           |           |           |           |           |           |           |           |           |           |           |           |           |           |           |           |           |           |           |           |           |           |           |           |           |           |           |           |           |           |           |           |           |           |           |           |           |           |           |
| H                 | -0.65709                                                                                                                                                                                                                                                                                                                                                                                                                                                                                                                                                                                                                                                                                                                                                                                                                                                                                                                                                                                                                                                                                                                                                                                                                                                                                                                                                                                                                                                                                                                                                                                                                                                                                                                                                                                                                                                                                                                                                                                                                                                                                                                                                                                                                                                                                                                                                                                                                                                                                                                                                                                  | -3.38081           | -0.75998 |   |   |   |          |          |          |   |          |          |         |    |          |          |          |    |          |          |         |    |         |          |          |   |          |          |         |   |          |          |         |   |          |          |          |   |          |          |          |    |         |         |          |    |         |          |         |   |         |         |          |   |         |          |          |   |         |         |         |   |         |          |          |   |         |         |         |   |         |         |         |   |          |         |          |   |         |         |         |   |          |         |         |   |          |         |          |   |          |         |          |   |          |         |          |   |          |         |         |   |          |         |         |   |          |         |         |   |          |         |         |   |          |         |         |   |          |         |         |   |          |         |          |   |          |         |         |   |          |         |         |   |         |         |          |                                                                                                                                                                                                                                                                                                                                                                                                                                                                                                                                                                                                                                                                                                                                                                                                                                                                                                                                                                                                                                                                                                                                                                                                                                                                                                                                                                                                                                                                                                                                                                                                                                                                                                                                                                                                                                                                                                                                                                                                                                                                                                                                                                                                                                                                                                                                                                                                                                              |         |         |         |         |         |         |         |          |          |          |          |          |          |          |          |          |          |          |          |          |          |          |          |          |          |          |          |          |          |          |          |          |          |          |          |          |          |          |          |          |          |          |          |          |          |          |          |          |          |          |          |          |          |          |           |           |           |           |           |           |           |           |           |           |           |           |           |           |           |           |           |           |           |           |           |           |           |           |           |           |           |           |           |           |           |           |           |           |           |           |           |           |           |           |           |           |           |           |           |           |           |           |           |           |           |           |           |           |
| Cl                | 2.67892                                                                                                                                                                                                                                                                                                                                                                                                                                                                                                                                                                                                                                                                                                                                                                                                                                                                                                                                                                                                                                                                                                                                                                                                                                                                                                                                                                                                                                                                                                                                                                                                                                                                                                                                                                                                                                                                                                                                                                                                                                                                                                                                                                                                                                                                                                                                                                                                                                                                                                                                                                                   | 1.80303            | -1.53775 |   |   |   |          |          |          |   |          |          |         |    |          |          |          |    |          |          |         |    |         |          |          |   |          |          |         |   |          |          |         |   |          |          |          |   |          |          |          |    |         |         |          |    |         |          |         |   |         |         |          |   |         |          |          |   |         |         |         |   |         |          |          |   |         |         |         |   |         |         |         |   |          |         |          |   |         |         |         |   |          |         |         |   |          |         |          |   |          |         |          |   |          |         |          |   |          |         |         |   |          |         |         |   |          |         |         |   |          |         |         |   |          |         |         |   |          |         |         |   |          |         |          |   |          |         |         |   |          |         |         |   |         |         |          |                                                                                                                                                                                                                                                                                                                                                                                                                                                                                                                                                                                                                                                                                                                                                                                                                                                                                                                                                                                                                                                                                                                                                                                                                                                                                                                                                                                                                                                                                                                                                                                                                                                                                                                                                                                                                                                                                                                                                                                                                                                                                                                                                                                                                                                                                                                                                                                                                                              |         |         |         |         |         |         |         |          |          |          |          |          |          |          |          |          |          |          |          |          |          |          |          |          |          |          |          |          |          |          |          |          |          |          |          |          |          |          |          |          |          |          |          |          |          |          |          |          |          |          |          |          |          |          |           |           |           |           |           |           |           |           |           |           |           |           |           |           |           |           |           |           |           |           |           |           |           |           |           |           |           |           |           |           |           |           |           |           |           |           |           |           |           |           |           |           |           |           |           |           |           |           |           |           |           |           |           |           |
| Cl                | 2.46179                                                                                                                                                                                                                                                                                                                                                                                                                                                                                                                                                                                                                                                                                                                                                                                                                                                                                                                                                                                                                                                                                                                                                                                                                                                                                                                                                                                                                                                                                                                                                                                                                                                                                                                                                                                                                                                                                                                                                                                                                                                                                                                                                                                                                                                                                                                                                                                                                                                                                                                                                                                   | -1.89174           | 0.96918  |   |   |   |          |          |          |   |          |          |         |    |          |          |          |    |          |          |         |    |         |          |          |   |          |          |         |   |          |          |         |   |          |          |          |   |          |          |          |    |         |         |          |    |         |          |         |   |         |         |          |   |         |          |          |   |         |         |         |   |         |          |          |   |         |         |         |   |         |         |         |   |          |         |          |   |         |         |         |   |          |         |         |   |          |         |          |   |          |         |          |   |          |         |          |   |          |         |         |   |          |         |         |   |          |         |         |   |          |         |         |   |          |         |         |   |          |         |         |   |          |         |          |   |          |         |         |   |          |         |         |   |         |         |          |                                                                                                                                                                                                                                                                                                                                                                                                                                                                                                                                                                                                                                                                                                                                                                                                                                                                                                                                                                                                                                                                                                                                                                                                                                                                                                                                                                                                                                                                                                                                                                                                                                                                                                                                                                                                                                                                                                                                                                                                                                                                                                                                                                                                                                                                                                                                                                                                                                              |         |         |         |         |         |         |         |          |          |          |          |          |          |          |          |          |          |          |          |          |          |          |          |          |          |          |          |          |          |          |          |          |          |          |          |          |          |          |          |          |          |          |          |          |          |          |          |          |          |          |          |          |          |          |           |           |           |           |           |           |           |           |           |           |           |           |           |           |           |           |           |           |           |           |           |           |           |           |           |           |           |           |           |           |           |           |           |           |           |           |           |           |           |           |           |           |           |           |           |           |           |           |           |           |           |           |           |           |
| H                 | 5.05777                                                                                                                                                                                                                                                                                                                                                                                                                                                                                                                                                                                                                                                                                                                                                                                                                                                                                                                                                                                                                                                                                                                                                                                                                                                                                                                                                                                                                                                                                                                                                                                                                                                                                                                                                                                                                                                                                                                                                                                                                                                                                                                                                                                                                                                                                                                                                                                                                                                                                                                                                                                   | 0.40589            | -1.15659 |   |   |   |          |          |          |   |          |          |         |    |          |          |          |    |          |          |         |    |         |          |          |   |          |          |         |   |          |          |         |   |          |          |          |   |          |          |          |    |         |         |          |    |         |          |         |   |         |         |          |   |         |          |          |   |         |         |         |   |         |          |          |   |         |         |         |   |         |         |         |   |          |         |          |   |         |         |         |   |          |         |         |   |          |         |          |   |          |         |          |   |          |         |          |   |          |         |         |   |          |         |         |   |          |         |         |   |          |         |         |   |          |         |         |   |          |         |         |   |          |         |          |   |          |         |         |   |          |         |         |   |         |         |          |                                                                                                                                                                                                                                                                                                                                                                                                                                                                                                                                                                                                                                                                                                                                                                                                                                                                                                                                                                                                                                                                                                                                                                                                                                                                                                                                                                                                                                                                                                                                                                                                                                                                                                                                                                                                                                                                                                                                                                                                                                                                                                                                                                                                                                                                                                                                                                                                                                              |         |         |         |         |         |         |         |          |          |          |          |          |          |          |          |          |          |          |          |          |          |          |          |          |          |          |          |          |          |          |          |          |          |          |          |          |          |          |          |          |          |          |          |          |          |          |          |          |          |          |          |          |          |          |           |           |           |           |           |           |           |           |           |           |           |           |           |           |           |           |           |           |           |           |           |           |           |           |           |           |           |           |           |           |           |           |           |           |           |           |           |           |           |           |           |           |           |           |           |           |           |           |           |           |           |           |           |           |
| C                 | 4.82946                                                                                                                                                                                                                                                                                                                                                                                                                                                                                                                                                                                                                                                                                                                                                                                                                                                                                                                                                                                                                                                                                                                                                                                                                                                                                                                                                                                                                                                                                                                                                                                                                                                                                                                                                                                                                                                                                                                                                                                                                                                                                                                                                                                                                                                                                                                                                                                                                                                                                                                                                                                   | -0.08311           | -0.21448 |   |   |   |          |          |          |   |          |          |         |    |          |          |          |    |          |          |         |    |         |          |          |   |          |          |         |   |          |          |         |   |          |          |          |   |          |          |          |    |         |         |          |    |         |          |         |   |         |         |          |   |         |          |          |   |         |         |         |   |         |          |          |   |         |         |         |   |         |         |         |   |          |         |          |   |         |         |         |   |          |         |         |   |          |         |          |   |          |         |          |   |          |         |          |   |          |         |         |   |          |         |         |   |          |         |         |   |          |         |         |   |          |         |         |   |          |         |         |   |          |         |          |   |          |         |         |   |          |         |         |   |         |         |          |                                                                                                                                                                                                                                                                                                                                                                                                                                                                                                                                                                                                                                                                                                                                                                                                                                                                                                                                                                                                                                                                                                                                                                                                                                                                                                                                                                                                                                                                                                                                                                                                                                                                                                                                                                                                                                                                                                                                                                                                                                                                                                                                                                                                                                                                                                                                                                                                                                              |         |         |         |         |         |         |         |          |          |          |          |          |          |          |          |          |          |          |          |          |          |          |          |          |          |          |          |          |          |          |          |          |          |          |          |          |          |          |          |          |          |          |          |          |          |          |          |          |          |          |          |          |          |          |           |           |           |           |           |           |           |           |           |           |           |           |           |           |           |           |           |           |           |           |           |           |           |           |           |           |           |           |           |           |           |           |           |           |           |           |           |           |           |           |           |           |           |           |           |           |           |           |           |           |           |           |           |           |
| C                 | 4.36895                                                                                                                                                                                                                                                                                                                                                                                                                                                                                                                                                                                                                                                                                                                                                                                                                                                                                                                                                                                                                                                                                                                                                                                                                                                                                                                                                                                                                                                                                                                                                                                                                                                                                                                                                                                                                                                                                                                                                                                                                                                                                                                                                                                                                                                                                                                                                                                                                                                                                                                                                                                   | 0.62818            | 0.84089  |   |   |   |          |          |          |   |          |          |         |    |          |          |          |    |          |          |         |    |         |          |          |   |          |          |         |   |          |          |         |   |          |          |          |   |          |          |          |    |         |         |          |    |         |          |         |   |         |         |          |   |         |          |          |   |         |         |         |   |         |          |          |   |         |         |         |   |         |         |         |   |          |         |          |   |         |         |         |   |          |         |         |   |          |         |          |   |          |         |          |   |          |         |          |   |          |         |         |   |          |         |         |   |          |         |         |   |          |         |         |   |          |         |         |   |          |         |         |   |          |         |          |   |          |         |         |   |          |         |         |   |         |         |          |                                                                                                                                                                                                                                                                                                                                                                                                                                                                                                                                                                                                                                                                                                                                                                                                                                                                                                                                                                                                                                                                                                                                                                                                                                                                                                                                                                                                                                                                                                                                                                                                                                                                                                                                                                                                                                                                                                                                                                                                                                                                                                                                                                                                                                                                                                                                                                                                                                              |         |         |         |         |         |         |         |          |          |          |          |          |          |          |          |          |          |          |          |          |          |          |          |          |          |          |          |          |          |          |          |          |          |          |          |          |          |          |          |          |          |          |          |          |          |          |          |          |          |          |          |          |          |          |           |           |           |           |           |           |           |           |           |           |           |           |           |           |           |           |           |           |           |           |           |           |           |           |           |           |           |           |           |           |           |           |           |           |           |           |           |           |           |           |           |           |           |           |           |           |           |           |           |           |           |           |           |           |
| H                 | 5.01813                                                                                                                                                                                                                                                                                                                                                                                                                                                                                                                                                                                                                                                                                                                                                                                                                                                                                                                                                                                                                                                                                                                                                                                                                                                                                                                                                                                                                                                                                                                                                                                                                                                                                                                                                                                                                                                                                                                                                                                                                                                                                                                                                                                                                                                                                                                                                                                                                                                                                                                                                                                   | -1.14878           | -0.12099 |   |   |   |          |          |          |   |          |          |         |    |          |          |          |    |          |          |         |    |         |          |          |   |          |          |         |   |          |          |         |   |          |          |          |   |          |          |          |    |         |         |          |    |         |          |         |   |         |         |          |   |         |          |          |   |         |         |         |   |         |          |          |   |         |         |         |   |         |         |         |   |          |         |          |   |         |         |         |   |          |         |         |   |          |         |          |   |          |         |          |   |          |         |          |   |          |         |         |   |          |         |         |   |          |         |         |   |          |         |         |   |          |         |         |   |          |         |         |   |          |         |          |   |          |         |         |   |          |         |         |   |         |         |          |                                                                                                                                                                                                                                                                                                                                                                                                                                                                                                                                                                                                                                                                                                                                                                                                                                                                                                                                                                                                                                                                                                                                                                                                                                                                                                                                                                                                                                                                                                                                                                                                                                                                                                                                                                                                                                                                                                                                                                                                                                                                                                                                                                                                                                                                                                                                                                                                                                              |         |         |         |         |         |         |         |          |          |          |          |          |          |          |          |          |          |          |          |          |          |          |          |          |          |          |          |          |          |          |          |          |          |          |          |          |          |          |          |          |          |          |          |          |          |          |          |          |          |          |          |          |          |          |           |           |           |           |           |           |           |           |           |           |           |           |           |           |           |           |           |           |           |           |           |           |           |           |           |           |           |           |           |           |           |           |           |           |           |           |           |           |           |           |           |           |           |           |           |           |           |           |           |           |           |           |           |           |
| H                 | 4.20498                                                                                                                                                                                                                                                                                                                                                                                                                                                                                                                                                                                                                                                                                                                                                                                                                                                                                                                                                                                                                                                                                                                                                                                                                                                                                                                                                                                                                                                                                                                                                                                                                                                                                                                                                                                                                                                                                                                                                                                                                                                                                                                                                                                                                                                                                                                                                                                                                                                                                                                                                                                   | 0.14007            | 1.79597  |   |   |   |          |          |          |   |          |          |         |    |          |          |          |    |          |          |         |    |         |          |          |   |          |          |         |   |          |          |         |   |          |          |          |   |          |          |          |    |         |         |          |    |         |          |         |   |         |         |          |   |         |          |          |   |         |         |         |   |         |          |          |   |         |         |         |   |         |         |         |   |          |         |          |   |         |         |         |   |          |         |         |   |          |         |          |   |          |         |          |   |          |         |          |   |          |         |         |   |          |         |         |   |          |         |         |   |          |         |         |   |          |         |         |   |          |         |         |   |          |         |          |   |          |         |         |   |          |         |         |   |         |         |          |                                                                                                                                                                                                                                                                                                                                                                                                                                                                                                                                                                                                                                                                                                                                                                                                                                                                                                                                                                                                                                                                                                                                                                                                                                                                                                                                                                                                                                                                                                                                                                                                                                                                                                                                                                                                                                                                                                                                                                                                                                                                                                                                                                                                                                                                                                                                                                                                                                              |         |         |         |         |         |         |         |          |          |          |          |          |          |          |          |          |          |          |          |          |          |          |          |          |          |          |          |          |          |          |          |          |          |          |          |          |          |          |          |          |          |          |          |          |          |          |          |          |          |          |          |          |          |          |           |           |           |           |           |           |           |           |           |           |           |           |           |           |           |           |           |           |           |           |           |           |           |           |           |           |           |           |           |           |           |           |           |           |           |           |           |           |           |           |           |           |           |           |           |           |           |           |           |           |           |           |           |           |
| H                 | 4.23079                                                                                                                                                                                                                                                                                                                                                                                                                                                                                                                                                                                                                                                                                                                                                                                                                                                                                                                                                                                                                                                                                                                                                                                                                                                                                                                                                                                                                                                                                                                                                                                                                                                                                                                                                                                                                                                                                                                                                                                                                                                                                                                                                                                                                                                                                                                                                                                                                                                                                                                                                                                   | 1.70250            | 0.76834  |   |   |   |          |          |          |   |          |          |         |    |          |          |          |    |          |          |         |    |         |          |          |   |          |          |         |   |          |          |         |   |          |          |          |   |          |          |          |    |         |         |          |    |         |          |         |   |         |         |          |   |         |          |          |   |         |         |         |   |         |          |          |   |         |         |         |   |         |         |         |   |          |         |          |   |         |         |         |   |          |         |         |   |          |         |          |   |          |         |          |   |          |         |          |   |          |         |         |   |          |         |         |   |          |         |         |   |          |         |         |   |          |         |         |   |          |         |         |   |          |         |          |   |          |         |         |   |          |         |         |   |         |         |          |                                                                                                                                                                                                                                                                                                                                                                                                                                                                                                                                                                                                                                                                                                                                                                                                                                                                                                                                                                                                                                                                                                                                                                                                                                                                                                                                                                                                                                                                                                                                                                                                                                                                                                                                                                                                                                                                                                                                                                                                                                                                                                                                                                                                                                                                                                                                                                                                                                              |         |         |         |         |         |         |         |          |          |          |          |          |          |          |          |          |          |          |          |          |          |          |          |          |          |          |          |          |          |          |          |          |          |          |          |          |          |          |          |          |          |          |          |          |          |          |          |          |          |          |          |          |          |          |           |           |           |           |           |           |           |           |           |           |           |           |           |           |           |           |           |           |           |           |           |           |           |           |           |           |           |           |           |           |           |           |           |           |           |           |           |           |           |           |           |           |           |           |           |           |           |           |           |           |           |           |           |           |
| C                 | -0.78122                                                                                                                                                                                                                                                                                                                                                                                                                                                                                                                                                                                                                                                                                                                                                                                                                                                                                                                                                                                                                                                                                                                                                                                                                                                                                                                                                                                                                                                                                                                                                                                                                                                                                                                                                                                                                                                                                                                                                                                                                                                                                                                                                                                                                                                                                                                                                                                                                                                                                                                                                                                  | 2.13174            | -0.47951 |   |   |   |          |          |          |   |          |          |         |    |          |          |          |    |          |          |         |    |         |          |          |   |          |          |         |   |          |          |         |   |          |          |          |   |          |          |          |    |         |         |          |    |         |          |         |   |         |         |          |   |         |          |          |   |         |         |         |   |         |          |          |   |         |         |         |   |         |         |         |   |          |         |          |   |         |         |         |   |          |         |         |   |          |         |          |   |          |         |          |   |          |         |          |   |          |         |         |   |          |         |         |   |          |         |         |   |          |         |         |   |          |         |         |   |          |         |         |   |          |         |          |   |          |         |         |   |          |         |         |   |         |         |          |                                                                                                                                                                                                                                                                                                                                                                                                                                                                                                                                                                                                                                                                                                                                                                                                                                                                                                                                                                                                                                                                                                                                                                                                                                                                                                                                                                                                                                                                                                                                                                                                                                                                                                                                                                                                                                                                                                                                                                                                                                                                                                                                                                                                                                                                                                                                                                                                                                              |         |         |         |         |         |         |         |          |          |          |          |          |          |          |          |          |          |          |          |          |          |          |          |          |          |          |          |          |          |          |          |          |          |          |          |          |          |          |          |          |          |          |          |          |          |          |          |          |          |          |          |          |          |          |           |           |           |           |           |           |           |           |           |           |           |           |           |           |           |           |           |           |           |           |           |           |           |           |           |           |           |           |           |           |           |           |           |           |           |           |           |           |           |           |           |           |           |           |           |           |           |           |           |           |           |           |           |           |
| O                 | 0.45606                                                                                                                                                                                                                                                                                                                                                                                                                                                                                                                                                                                                                                                                                                                                                                                                                                                                                                                                                                                                                                                                                                                                                                                                                                                                                                                                                                                                                                                                                                                                                                                                                                                                                                                                                                                                                                                                                                                                                                                                                                                                                                                                                                                                                                                                                                                                                                                                                                                                                                                                                                                   | 0.85882            | 1.23159  |   |   |   |          |          |          |   |          |          |         |    |          |          |          |    |          |          |         |    |         |          |          |   |          |          |         |   |          |          |         |   |          |          |          |   |          |          |          |    |         |         |          |    |         |          |         |   |         |         |          |   |         |          |          |   |         |         |         |   |         |          |          |   |         |         |         |   |         |         |         |   |          |         |          |   |         |         |         |   |          |         |         |   |          |         |          |   |          |         |          |   |          |         |          |   |          |         |         |   |          |         |         |   |          |         |         |   |          |         |         |   |          |         |         |   |          |         |         |   |          |         |          |   |          |         |         |   |          |         |         |   |         |         |          |                                                                                                                                                                                                                                                                                                                                                                                                                                                                                                                                                                                                                                                                                                                                                                                                                                                                                                                                                                                                                                                                                                                                                                                                                                                                                                                                                                                                                                                                                                                                                                                                                                                                                                                                                                                                                                                                                                                                                                                                                                                                                                                                                                                                                                                                                                                                                                                                                                              |         |         |         |         |         |         |         |          |          |          |          |          |          |          |          |          |          |          |          |          |          |          |          |          |          |          |          |          |          |          |          |          |          |          |          |          |          |          |          |          |          |          |          |          |          |          |          |          |          |          |          |          |          |          |           |           |           |           |           |           |           |           |           |           |           |           |           |           |           |           |           |           |           |           |           |           |           |           |           |           |           |           |           |           |           |           |           |           |           |           |           |           |           |           |           |           |           |           |           |           |           |           |           |           |           |           |           |           |
| C                 | -0.73857                                                                                                                                                                                                                                                                                                                                                                                                                                                                                                                                                                                                                                                                                                                                                                                                                                                                                                                                                                                                                                                                                                                                                                                                                                                                                                                                                                                                                                                                                                                                                                                                                                                                                                                                                                                                                                                                                                                                                                                                                                                                                                                                                                                                                                                                                                                                                                                                                                                                                                                                                                                  | 1.20743            | 0.73523  |   |   |   |          |          |          |   |          |          |         |    |          |          |          |    |          |          |         |    |         |          |          |   |          |          |         |   |          |          |         |   |          |          |          |   |          |          |          |    |         |         |          |    |         |          |         |   |         |         |          |   |         |          |          |   |         |         |         |   |         |          |          |   |         |         |         |   |         |         |         |   |          |         |          |   |         |         |         |   |          |         |         |   |          |         |          |   |          |         |          |   |          |         |          |   |          |         |         |   |          |         |         |   |          |         |         |   |          |         |         |   |          |         |         |   |          |         |         |   |          |         |          |   |          |         |         |   |          |         |         |   |         |         |          |                                                                                                                                                                                                                                                                                                                                                                                                                                                                                                                                                                                                                                                                                                                                                                                                                                                                                                                                                                                                                                                                                                                                                                                                                                                                                                                                                                                                                                                                                                                                                                                                                                                                                                                                                                                                                                                                                                                                                                                                                                                                                                                                                                                                                                                                                                                                                                                                                                              |         |         |         |         |         |         |         |          |          |          |          |          |          |          |          |          |          |          |          |          |          |          |          |          |          |          |          |          |          |          |          |          |          |          |          |          |          |          |          |          |          |          |          |          |          |          |          |          |          |          |          |          |          |          |           |           |           |           |           |           |           |           |           |           |           |           |           |           |           |           |           |           |           |           |           |           |           |           |           |           |           |           |           |           |           |           |           |           |           |           |           |           |           |           |           |           |           |           |           |           |           |           |           |           |           |           |           |           |
| C                 | -1.53282                                                                                                                                                                                                                                                                                                                                                                                                                                                                                                                                                                                                                                                                                                                                                                                                                                                                                                                                                                                                                                                                                                                                                                                                                                                                                                                                                                                                                                                                                                                                                                                                                                                                                                                                                                                                                                                                                                                                                                                                                                                                                                                                                                                                                                                                                                                                                                                                                                                                                                                                                                                  | 1.23989            | -1.47761 |   |   |   |          |          |          |   |          |          |         |    |          |          |          |    |          |          |         |    |         |          |          |   |          |          |         |   |          |          |         |   |          |          |          |   |          |          |          |    |         |         |          |    |         |          |         |   |         |         |          |   |         |          |          |   |         |         |         |   |         |          |          |   |         |         |         |   |         |         |         |   |          |         |          |   |         |         |         |   |          |         |         |   |          |         |          |   |          |         |          |   |          |         |          |   |          |         |         |   |          |         |         |   |          |         |         |   |          |         |         |   |          |         |         |   |          |         |         |   |          |         |          |   |          |         |         |   |          |         |         |   |         |         |          |                                                                                                                                                                                                                                                                                                                                                                                                                                                                                                                                                                                                                                                                                                                                                                                                                                                                                                                                                                                                                                                                                                                                                                                                                                                                                                                                                                                                                                                                                                                                                                                                                                                                                                                                                                                                                                                                                                                                                                                                                                                                                                                                                                                                                                                                                                                                                                                                                                              |         |         |         |         |         |         |         |          |          |          |          |          |          |          |          |          |          |          |          |          |          |          |          |          |          |          |          |          |          |          |          |          |          |          |          |          |          |          |          |          |          |          |          |          |          |          |          |          |          |          |          |          |          |          |           |           |           |           |           |           |           |           |           |           |           |           |           |           |           |           |           |           |           |           |           |           |           |           |           |           |           |           |           |           |           |           |           |           |           |           |           |           |           |           |           |           |           |           |           |           |           |           |           |           |           |           |           |           |
| H                 | -2.58491                                                                                                                                                                                                                                                                                                                                                                                                                                                                                                                                                                                                                                                                                                                                                                                                                                                                                                                                                                                                                                                                                                                                                                                                                                                                                                                                                                                                                                                                                                                                                                                                                                                                                                                                                                                                                                                                                                                                                                                                                                                                                                                                                                                                                                                                                                                                                                                                                                                                                                                                                                                  | 1.49998            | -1.60035 |   |   |   |          |          |          |   |          |          |         |    |          |          |          |    |          |          |         |    |         |          |          |   |          |          |         |   |          |          |         |   |          |          |          |   |          |          |          |    |         |         |          |    |         |          |         |   |         |         |          |   |         |          |          |   |         |         |         |   |         |          |          |   |         |         |         |   |         |         |         |   |          |         |          |   |         |         |         |   |          |         |         |   |          |         |          |   |          |         |          |   |          |         |          |   |          |         |         |   |          |         |         |   |          |         |         |   |          |         |         |   |          |         |         |   |          |         |         |   |          |         |          |   |          |         |         |   |          |         |         |   |         |         |          |                                                                                                                                                                                                                                                                                                                                                                                                                                                                                                                                                                                                                                                                                                                                                                                                                                                                                                                                                                                                                                                                                                                                                                                                                                                                                                                                                                                                                                                                                                                                                                                                                                                                                                                                                                                                                                                                                                                                                                                                                                                                                                                                                                                                                                                                                                                                                                                                                                              |         |         |         |         |         |         |         |          |          |          |          |          |          |          |          |          |          |          |          |          |          |          |          |          |          |          |          |          |          |          |          |          |          |          |          |          |          |          |          |          |          |          |          |          |          |          |          |          |          |          |          |          |          |          |           |           |           |           |           |           |           |           |           |           |           |           |           |           |           |           |           |           |           |           |           |           |           |           |           |           |           |           |           |           |           |           |           |           |           |           |           |           |           |           |           |           |           |           |           |           |           |           |           |           |           |           |           |           |
| H                 | -1.02207                                                                                                                                                                                                                                                                                                                                                                                                                                                                                                                                                                                                                                                                                                                                                                                                                                                                                                                                                                                                                                                                                                                                                                                                                                                                                                                                                                                                                                                                                                                                                                                                                                                                                                                                                                                                                                                                                                                                                                                                                                                                                                                                                                                                                                                                                                                                                                                                                                                                                                                                                                                  | 1.12380            | -2.43310 |   |   |   |          |          |          |   |          |          |         |    |          |          |          |    |          |          |         |    |         |          |          |   |          |          |         |   |          |          |         |   |          |          |          |   |          |          |          |    |         |         |          |    |         |          |         |   |         |         |          |   |         |          |          |   |         |         |         |   |         |          |          |   |         |         |         |   |         |         |         |   |          |         |          |   |         |         |         |   |          |         |         |   |          |         |          |   |          |         |          |   |          |         |          |   |          |         |         |   |          |         |         |   |          |         |         |   |          |         |         |   |          |         |         |   |          |         |         |   |          |         |          |   |          |         |         |   |          |         |         |   |         |         |          |                                                                                                                                                                                                                                                                                                                                                                                                                                                                                                                                                                                                                                                                                                                                                                                                                                                                                                                                                                                                                                                                                                                                                                                                                                                                                                                                                                                                                                                                                                                                                                                                                                                                                                                                                                                                                                                                                                                                                                                                                                                                                                                                                                                                                                                                                                                                                                                                                                              |         |         |         |         |         |         |         |          |          |          |          |          |          |          |          |          |          |          |          |          |          |          |          |          |          |          |          |          |          |          |          |          |          |          |          |          |          |          |          |          |          |          |          |          |          |          |          |          |          |          |          |          |          |          |           |           |           |           |           |           |           |           |           |           |           |           |           |           |           |           |           |           |           |           |           |           |           |           |           |           |           |           |           |           |           |           |           |           |           |           |           |           |           |           |           |           |           |           |           |           |           |           |           |           |           |           |           |           |
| C                 | -1.82877                                                                                                                                                                                                                                                                                                                                                                                                                                                                                                                                                                                                                                                                                                                                                                                                                                                                                                                                                                                                                                                                                                                                                                                                                                                                                                                                                                                                                                                                                                                                                                                                                                                                                                                                                                                                                                                                                                                                                                                                                                                                                                                                                                                                                                                                                                                                                                                                                                                                                                                                                                                  | 1.64324            | 1.71341  |   |   |   |          |          |          |   |          |          |         |    |          |          |          |    |          |          |         |    |         |          |          |   |          |          |         |   |          |          |         |   |          |          |          |   |          |          |          |    |         |         |          |    |         |          |         |   |         |         |          |   |         |          |          |   |         |         |         |   |         |          |          |   |         |         |         |   |         |         |         |   |          |         |          |   |         |         |         |   |          |         |         |   |          |         |          |   |          |         |          |   |          |         |          |   |          |         |         |   |          |         |         |   |          |         |         |   |          |         |         |   |          |         |         |   |          |         |         |   |          |         |          |   |          |         |         |   |          |         |         |   |         |         |          |                                                                                                                                                                                                                                                                                                                                                                                                                                                                                                                                                                                                                                                                                                                                                                                                                                                                                                                                                                                                                                                                                                                                                                                                                                                                                                                                                                                                                                                                                                                                                                                                                                                                                                                                                                                                                                                                                                                                                                                                                                                                                                                                                                                                                                                                                                                                                                                                                                              |         |         |         |         |         |         |         |          |          |          |          |          |          |          |          |          |          |          |          |          |          |          |          |          |          |          |          |          |          |          |          |          |          |          |          |          |          |          |          |          |          |          |          |          |          |          |          |          |          |          |          |          |          |          |           |           |           |           |           |           |           |           |           |           |           |           |           |           |           |           |           |           |           |           |           |           |           |           |           |           |           |           |           |           |           |           |           |           |           |           |           |           |           |           |           |           |           |           |           |           |           |           |           |           |           |           |           |           |
| H                 | -2.40342                                                                                                                                                                                                                                                                                                                                                                                                                                                                                                                                                                                                                                                                                                                                                                                                                                                                                                                                                                                                                                                                                                                                                                                                                                                                                                                                                                                                                                                                                                                                                                                                                                                                                                                                                                                                                                                                                                                                                                                                                                                                                                                                                                                                                                                                                                                                                                                                                                                                                                                                                                                  | 0.82233            | 2.14501  |   |   |   |          |          |          |   |          |          |         |    |          |          |          |    |          |          |         |    |         |          |          |   |          |          |         |   |          |          |         |   |          |          |          |   |          |          |          |    |         |         |          |    |         |          |         |   |         |         |          |   |         |          |          |   |         |         |         |   |         |          |          |   |         |         |         |   |         |         |         |   |          |         |          |   |         |         |         |   |          |         |         |   |          |         |          |   |          |         |          |   |          |         |          |   |          |         |         |   |          |         |         |   |          |         |         |   |          |         |         |   |          |         |         |   |          |         |         |   |          |         |          |   |          |         |         |   |          |         |         |   |         |         |          |                                                                                                                                                                                                                                                                                                                                                                                                                                                                                                                                                                                                                                                                                                                                                                                                                                                                                                                                                                                                                                                                                                                                                                                                                                                                                                                                                                                                                                                                                                                                                                                                                                                                                                                                                                                                                                                                                                                                                                                                                                                                                                                                                                                                                                                                                                                                                                                                                                              |         |         |         |         |         |         |         |          |          |          |          |          |          |          |          |          |          |          |          |          |          |          |          |          |          |          |          |          |          |          |          |          |          |          |          |          |          |          |          |          |          |          |          |          |          |          |          |          |          |          |          |          |          |          |           |           |           |           |           |           |           |           |           |           |           |           |           |           |           |           |           |           |           |           |           |           |           |           |           |           |           |           |           |           |           |           |           |           |           |           |           |           |           |           |           |           |           |           |           |           |           |           |           |           |           |           |           |           |
| C                 | -2.65358                                                                                                                                                                                                                                                                                                                                                                                                                                                                                                                                                                                                                                                                                                                                                                                                                                                                                                                                                                                                                                                                                                                                                                                                                                                                                                                                                                                                                                                                                                                                                                                                                                                                                                                                                                                                                                                                                                                                                                                                                                                                                                                                                                                                                                                                                                                                                                                                                                                                                                                                                                                  | 2.68026            | 0.94201  |   |   |   |          |          |          |   |          |          |         |    |          |          |          |    |          |          |         |    |         |          |          |   |          |          |         |   |          |          |         |   |          |          |          |   |          |          |          |    |         |         |          |    |         |          |         |   |         |         |          |   |         |          |          |   |         |         |         |   |         |          |          |   |         |         |         |   |         |         |         |   |          |         |          |   |         |         |         |   |          |         |         |   |          |         |          |   |          |         |          |   |          |         |          |   |          |         |         |   |          |         |         |   |          |         |         |   |          |         |         |   |          |         |         |   |          |         |         |   |          |         |          |   |          |         |         |   |          |         |         |   |         |         |          |                                                                                                                                                                                                                                                                                                                                                                                                                                                                                                                                                                                                                                                                                                                                                                                                                                                                                                                                                                                                                                                                                                                                                                                                                                                                                                                                                                                                                                                                                                                                                                                                                                                                                                                                                                                                                                                                                                                                                                                                                                                                                                                                                                                                                                                                                                                                                                                                                                              |         |         |         |         |         |         |         |          |          |          |          |          |          |          |          |          |          |          |          |          |          |          |          |          |          |          |          |          |          |          |          |          |          |          |          |          |          |          |          |          |          |          |          |          |          |          |          |          |          |          |          |          |          |          |           |           |           |           |           |           |           |           |           |           |           |           |           |           |           |           |           |           |           |           |           |           |           |           |           |           |           |           |           |           |           |           |           |           |           |           |           |           |           |           |           |           |           |           |           |           |           |           |           |           |           |           |           |           |
| H                 | -3.44687                                                                                                                                                                                                                                                                                                                                                                                                                                                                                                                                                                                                                                                                                                                                                                                                                                                                                                                                                                                                                                                                                                                                                                                                                                                                                                                                                                                                                                                                                                                                                                                                                                                                                                                                                                                                                                                                                                                                                                                                                                                                                                                                                                                                                                                                                                                                                                                                                                                                                                                                                                                  | 2.18331            | 0.37895  |   |   |   |          |          |          |   |          |          |         |    |          |          |          |    |          |          |         |    |         |          |          |   |          |          |         |   |          |          |         |   |          |          |          |   |          |          |          |    |         |         |          |    |         |          |         |   |         |         |          |   |         |          |          |   |         |         |         |   |         |          |          |   |         |         |         |   |         |         |         |   |          |         |          |   |         |         |         |   |          |         |         |   |          |         |          |   |          |         |          |   |          |         |          |   |          |         |         |   |          |         |         |   |          |         |         |   |          |         |         |   |          |         |         |   |          |         |         |   |          |         |          |   |          |         |         |   |          |         |         |   |         |         |          |                                                                                                                                                                                                                                                                                                                                                                                                                                                                                                                                                                                                                                                                                                                                                                                                                                                                                                                                                                                                                                                                                                                                                                                                                                                                                                                                                                                                                                                                                                                                                                                                                                                                                                                                                                                                                                                                                                                                                                                                                                                                                                                                                                                                                                                                                                                                                                                                                                              |         |         |         |         |         |         |         |          |          |          |          |          |          |          |          |          |          |          |          |          |          |          |          |          |          |          |          |          |          |          |          |          |          |          |          |          |          |          |          |          |          |          |          |          |          |          |          |          |          |          |          |          |          |          |           |           |           |           |           |           |           |           |           |           |           |           |           |           |           |           |           |           |           |           |           |           |           |           |           |           |           |           |           |           |           |           |           |           |           |           |           |           |           |           |           |           |           |           |           |           |           |           |           |           |           |           |           |           |
| H                 | -3.11877                                                                                                                                                                                                                                                                                                                                                                                                                                                                                                                                                                                                                                                                                                                                                                                                                                                                                                                                                                                                                                                                                                                                                                                                                                                                                                                                                                                                                                                                                                                                                                                                                                                                                                                                                                                                                                                                                                                                                                                                                                                                                                                                                                                                                                                                                                                                                                                                                                                                                                                                                                                  | 3.40241            | 1.61583  |   |   |   |          |          |          |   |          |          |         |    |          |          |          |    |          |          |         |    |         |          |          |   |          |          |         |   |          |          |         |   |          |          |          |   |          |          |          |    |         |         |          |    |         |          |         |   |         |         |          |   |         |          |          |   |         |         |         |   |         |          |          |   |         |         |         |   |         |         |         |   |          |         |          |   |         |         |         |   |          |         |         |   |          |         |          |   |          |         |          |   |          |         |          |   |          |         |         |   |          |         |         |   |          |         |         |   |          |         |         |   |          |         |         |   |          |         |         |   |          |         |          |   |          |         |         |   |          |         |         |   |         |         |          |                                                                                                                                                                                                                                                                                                                                                                                                                                                                                                                                                                                                                                                                                                                                                                                                                                                                                                                                                                                                                                                                                                                                                                                                                                                                                                                                                                                                                                                                                                                                                                                                                                                                                                                                                                                                                                                                                                                                                                                                                                                                                                                                                                                                                                                                                                                                                                                                                                              |         |         |         |         |         |         |         |          |          |          |          |          |          |          |          |          |          |          |          |          |          |          |          |          |          |          |          |          |          |          |          |          |          |          |          |          |          |          |          |          |          |          |          |          |          |          |          |          |          |          |          |          |          |          |           |           |           |           |           |           |           |           |           |           |           |           |           |           |           |           |           |           |           |           |           |           |           |           |           |           |           |           |           |           |           |           |           |           |           |           |           |           |           |           |           |           |           |           |           |           |           |           |           |           |           |           |           |           |
| C                 | -1.62034                                                                                                                                                                                                                                                                                                                                                                                                                                                                                                                                                                                                                                                                                                                                                                                                                                                                                                                                                                                                                                                                                                                                                                                                                                                                                                                                                                                                                                                                                                                                                                                                                                                                                                                                                                                                                                                                                                                                                                                                                                                                                                                                                                                                                                                                                                                                                                                                                                                                                                                                                                                  | 3.32202            | 0.00043  |   |   |   |          |          |          |   |          |          |         |    |          |          |          |    |          |          |         |    |         |          |          |   |          |          |         |   |          |          |         |   |          |          |          |   |          |          |          |    |         |         |          |    |         |          |         |   |         |         |          |   |         |          |          |   |         |         |         |   |         |          |          |   |         |         |         |   |         |         |         |   |          |         |          |   |         |         |         |   |          |         |         |   |          |         |          |   |          |         |          |   |          |         |          |   |          |         |         |   |          |         |         |   |          |         |         |   |          |         |         |   |          |         |         |   |          |         |         |   |          |         |          |   |          |         |         |   |          |         |         |   |         |         |          |                                                                                                                                                                                                                                                                                                                                                                                                                                                                                                                                                                                                                                                                                                                                                                                                                                                                                                                                                                                                                                                                                                                                                                                                                                                                                                                                                                                                                                                                                                                                                                                                                                                                                                                                                                                                                                                                                                                                                                                                                                                                                                                                                                                                                                                                                                                                                                                                                                              |         |         |         |         |         |         |         |          |          |          |          |          |          |          |          |          |          |          |          |          |          |          |          |          |          |          |          |          |          |          |          |          |          |          |          |          |          |          |          |          |          |          |          |          |          |          |          |          |          |          |          |          |          |          |           |           |           |           |           |           |           |           |           |           |           |           |           |           |           |           |           |           |           |           |           |           |           |           |           |           |           |           |           |           |           |           |           |           |           |           |           |           |           |           |           |           |           |           |           |           |           |           |           |           |           |           |           |           |
| H                 | -2.07477                                                                                                                                                                                                                                                                                                                                                                                                                                                                                                                                                                                                                                                                                                                                                                                                                                                                                                                                                                                                                                                                                                                                                                                                                                                                                                                                                                                                                                                                                                                                                                                                                                                                                                                                                                                                                                                                                                                                                                                                                                                                                                                                                                                                                                                                                                                                                                                                                                                                                                                                                                                  | 3.85547            | -0.83856 |   |   |   |          |          |          |   |          |          |         |    |          |          |          |    |          |          |         |    |         |          |          |   |          |          |         |   |          |          |         |   |          |          |          |   |          |          |          |    |         |         |          |    |         |          |         |   |         |         |          |   |         |          |          |   |         |         |         |   |         |          |          |   |         |         |         |   |         |         |         |   |          |         |          |   |         |         |         |   |          |         |         |   |          |         |          |   |          |         |          |   |          |         |          |   |          |         |         |   |          |         |         |   |          |         |         |   |          |         |         |   |          |         |         |   |          |         |         |   |          |         |          |   |          |         |         |   |          |         |         |   |         |         |          |                                                                                                                                                                                                                                                                                                                                                                                                                                                                                                                                                                                                                                                                                                                                                                                                                                                                                                                                                                                                                                                                                                                                                                                                                                                                                                                                                                                                                                                                                                                                                                                                                                                                                                                                                                                                                                                                                                                                                                                                                                                                                                                                                                                                                                                                                                                                                                                                                                              |         |         |         |         |         |         |         |          |          |          |          |          |          |          |          |          |          |          |          |          |          |          |          |          |          |          |          |          |          |          |          |          |          |          |          |          |          |          |          |          |          |          |          |          |          |          |          |          |          |          |          |          |          |          |           |           |           |           |           |           |           |           |           |           |           |           |           |           |           |           |           |           |           |           |           |           |           |           |           |           |           |           |           |           |           |           |           |           |           |           |           |           |           |           |           |           |           |           |           |           |           |           |           |           |           |           |           |           |
| H                 | -0.98901                                                                                                                                                                                                                                                                                                                                                                                                                                                                                                                                                                                                                                                                                                                                                                                                                                                                                                                                                                                                                                                                                                                                                                                                                                                                                                                                                                                                                                                                                                                                                                                                                                                                                                                                                                                                                                                                                                                                                                                                                                                                                                                                                                                                                                                                                                                                                                                                                                                                                                                                                                                  | 4.02885            | 0.55058  |   |   |   |          |          |          |   |          |          |         |    |          |          |          |    |          |          |         |    |         |          |          |   |          |          |         |   |          |          |         |   |          |          |          |   |          |          |          |    |         |         |          |    |         |          |         |   |         |         |          |   |         |          |          |   |         |         |         |   |         |          |          |   |         |         |         |   |         |         |         |   |          |         |          |   |         |         |         |   |          |         |         |   |          |         |          |   |          |         |          |   |          |         |          |   |          |         |         |   |          |         |         |   |          |         |         |   |          |         |         |   |          |         |         |   |          |         |         |   |          |         |          |   |          |         |         |   |          |         |         |   |         |         |          |                                                                                                                                                                                                                                                                                                                                                                                                                                                                                                                                                                                                                                                                                                                                                                                                                                                                                                                                                                                                                                                                                                                                                                                                                                                                                                                                                                                                                                                                                                                                                                                                                                                                                                                                                                                                                                                                                                                                                                                                                                                                                                                                                                                                                                                                                                                                                                                                                                              |         |         |         |         |         |         |         |          |          |          |          |          |          |          |          |          |          |          |          |          |          |          |          |          |          |          |          |          |          |          |          |          |          |          |          |          |          |          |          |          |          |          |          |          |          |          |          |          |          |          |          |          |          |          |           |           |           |           |           |           |           |           |           |           |           |           |           |           |           |           |           |           |           |           |           |           |           |           |           |           |           |           |           |           |           |           |           |           |           |           |           |           |           |           |           |           |           |           |           |           |           |           |           |           |           |           |           |           |
| H                 | -1.29417                                                                                                                                                                                                                                                                                                                                                                                                                                                                                                                                                                                                                                                                                                                                                                                                                                                                                                                                                                                                                                                                                                                                                                                                                                                                                                                                                                                                                                                                                                                                                                                                                                                                                                                                                                                                                                                                                                                                                                                                                                                                                                                                                                                                                                                                                                                                                                                                                                                                                                                                                                                  | 2.15556            | 2.52279  |   |   |   |          |          |          |   |          |          |         |    |          |          |          |    |          |          |         |    |         |          |          |   |          |          |         |   |          |          |         |   |          |          |          |   |          |          |          |    |         |         |          |    |         |          |         |   |         |         |          |   |         |          |          |   |         |         |         |   |         |          |          |   |         |         |         |   |         |         |         |   |          |         |          |   |         |         |         |   |          |         |         |   |          |         |          |   |          |         |          |   |          |         |          |   |          |         |         |   |          |         |         |   |          |         |         |   |          |         |         |   |          |         |         |   |          |         |         |   |          |         |          |   |          |         |         |   |          |         |         |   |         |         |          |                                                                                                                                                                                                                                                                                                                                                                                                                                                                                                                                                                                                                                                                                                                                                                                                                                                                                                                                                                                                                                                                                                                                                                                                                                                                                                                                                                                                                                                                                                                                                                                                                                                                                                                                                                                                                                                                                                                                                                                                                                                                                                                                                                                                                                                                                                                                                                                                                                              |         |         |         |         |         |         |         |          |          |          |          |          |          |          |          |          |          |          |          |          |          |          |          |          |          |          |          |          |          |          |          |          |          |          |          |          |          |          |          |          |          |          |          |          |          |          |          |          |          |          |          |          |          |          |           |           |           |           |           |           |           |           |           |           |           |           |           |           |           |           |           |           |           |           |           |           |           |           |           |           |           |           |           |           |           |           |           |           |           |           |           |           |           |           |           |           |           |           |           |           |           |           |           |           |           |           |           |           |
| H                 | 0.22857                                                                                                                                                                                                                                                                                                                                                                                                                                                                                                                                                                                                                                                                                                                                                                                                                                                                                                                                                                                                                                                                                                                                                                                                                                                                                                                                                                                                                                                                                                                                                                                                                                                                                                                                                                                                                                                                                                                                                                                                                                                                                                                                                                                                                                                                                                                                                                                                                                                                                                                                                                                   | 2.36488            | -0.82421 |   |   |   |          |          |          |   |          |          |         |    |          |          |          |    |          |          |         |    |         |          |          |   |          |          |         |   |          |          |         |   |          |          |          |   |          |          |          |    |         |         |          |    |         |          |         |   |         |         |          |   |         |          |          |   |         |         |         |   |         |          |          |   |         |         |         |   |         |         |         |   |          |         |          |   |         |         |         |   |          |         |         |   |          |         |          |   |          |         |          |   |          |         |          |   |          |         |         |   |          |         |         |   |          |         |         |   |          |         |         |   |          |         |         |   |          |         |         |   |          |         |          |   |          |         |         |   |          |         |         |   |         |         |          |                                                                                                                                                                                                                                                                                                                                                                                                                                                                                                                                                                                                                                                                                                                                                                                                                                                                                                                                                                                                                                                                                                                                                                                                                                                                                                                                                                                                                                                                                                                                                                                                                                                                                                                                                                                                                                                                                                                                                                                                                                                                                                                                                                                                                                                                                                                                                                                                                                              |         |         |         |         |         |         |         |          |          |          |          |          |          |          |          |          |          |          |          |          |          |          |          |          |          |          |          |          |          |          |          |          |          |          |          |          |          |          |          |          |          |          |          |          |          |          |          |          |          |          |          |          |          |          |           |           |           |           |           |           |           |           |           |           |           |           |           |           |           |           |           |           |           |           |           |           |           |           |           |           |           |           |           |           |           |           |           |           |           |           |           |           |           |           |           |           |           |           |           |           |           |           |           |           |           |           |           |           |
| 22.1471           | 41.1865                                                                                                                                                                                                                                                                                                                                                                                                                                                                                                                                                                                                                                                                                                                                                                                                                                                                                                                                                                                                                                                                                                                                                                                                                                                                                                                                                                                                                                                                                                                                                                                                                                                                                                                                                                                                                                                                                                                                                                                                                                                                                                                                                                                                                                                                                                                                                                                                                                                                                                                                                                                   | 53.9921            |          |   |   |   |          |          |          |   |          |          |         |    |          |          |          |    |          |          |         |    |         |          |          |   |          |          |         |   |          |          |         |   |          |          |          |   |          |          |          |    |         |         |          |    |         |          |         |   |         |         |          |   |         |          |          |   |         |         |         |   |         |          |          |   |         |         |         |   |         |         |         |   |          |         |          |   |         |         |         |   |          |         |         |   |          |         |          |   |          |         |          |   |          |         |          |   |          |         |         |   |          |         |         |   |          |         |         |   |          |         |         |   |          |         |         |   |          |         |         |   |          |         |          |   |          |         |         |   |          |         |         |   |         |         |          |                                                                                                                                                                                                                                                                                                                                                                                                                                                                                                                                                                                                                                                                                                                                                                                                                                                                                                                                                                                                                                                                                                                                                                                                                                                                                                                                                                                                                                                                                                                                                                                                                                                                                                                                                                                                                                                                                                                                                                                                                                                                                                                                                                                                                                                                                                                                                                                                                                              |         |         |         |         |         |         |         |          |          |          |          |          |          |          |          |          |          |          |          |          |          |          |          |          |          |          |          |          |          |          |          |          |          |          |          |          |          |          |          |          |          |          |          |          |          |          |          |          |          |          |          |          |          |          |           |           |           |           |           |           |           |           |           |           |           |           |           |           |           |           |           |           |           |           |           |           |           |           |           |           |           |           |           |           |           |           |           |           |           |           |           |           |           |           |           |           |           |           |           |           |           |           |           |           |           |           |           |           |
| 65.7895           | 73.6227                                                                                                                                                                                                                                                                                                                                                                                                                                                                                                                                                                                                                                                                                                                                                                                                                                                                                                                                                                                                                                                                                                                                                                                                                                                                                                                                                                                                                                                                                                                                                                                                                                                                                                                                                                                                                                                                                                                                                                                                                                                                                                                                                                                                                                                                                                                                                                                                                                                                                                                                                                                   | 80.9747            |          |   |   |   |          |          |          |   |          |          |         |    |          |          |          |    |          |          |         |    |         |          |          |   |          |          |         |   |          |          |         |   |          |          |          |   |          |          |          |    |         |         |          |    |         |          |         |   |         |         |          |   |         |          |          |   |         |         |         |   |         |          |          |   |         |         |         |   |         |         |         |   |          |         |          |   |         |         |         |   |          |         |         |   |          |         |          |   |          |         |          |   |          |         |          |   |          |         |         |   |          |         |         |   |          |         |         |   |          |         |         |   |          |         |         |   |          |         |         |   |          |         |          |   |          |         |         |   |          |         |         |   |         |         |          |                                                                                                                                                                                                                                                                                                                                                                                                                                                                                                                                                                                                                                                                                                                                                                                                                                                                                                                                                                                                                                                                                                                                                                                                                                                                                                                                                                                                                                                                                                                                                                                                                                                                                                                                                                                                                                                                                                                                                                                                                                                                                                                                                                                                                                                                                                                                                                                                                                              |         |         |         |         |         |         |         |          |          |          |          |          |          |          |          |          |          |          |          |          |          |          |          |          |          |          |          |          |          |          |          |          |          |          |          |          |          |          |          |          |          |          |          |          |          |          |          |          |          |          |          |          |          |          |           |           |           |           |           |           |           |           |           |           |           |           |           |           |           |           |           |           |           |           |           |           |           |           |           |           |           |           |           |           |           |           |           |           |           |           |           |           |           |           |           |           |           |           |           |           |           |           |           |           |           |           |           |           |
| 93.1152           | 104.6790                                                                                                                                                                                                                                                                                                                                                                                                                                                                                                                                                                                                                                                                                                                                                                                                                                                                                                                                                                                                                                                                                                                                                                                                                                                                                                                                                                                                                                                                                                                                                                                                                                                                                                                                                                                                                                                                                                                                                                                                                                                                                                                                                                                                                                                                                                                                                                                                                                                                                                                                                                                  | 106.7081           |          |   |   |   |          |          |          |   |          |          |         |    |          |          |          |    |          |          |         |    |         |          |          |   |          |          |         |   |          |          |         |   |          |          |          |   |          |          |          |    |         |         |          |    |         |          |         |   |         |         |          |   |         |          |          |   |         |         |         |   |         |          |          |   |         |         |         |   |         |         |         |   |          |         |          |   |         |         |         |   |          |         |         |   |          |         |          |   |          |         |          |   |          |         |          |   |          |         |         |   |          |         |         |   |          |         |         |   |          |         |         |   |          |         |         |   |          |         |         |   |          |         |          |   |          |         |         |   |          |         |         |   |         |         |          |                                                                                                                                                                                                                                                                                                                                                                                                                                                                                                                                                                                                                                                                                                                                                                                                                                                                                                                                                                                                                                                                                                                                                                                                                                                                                                                                                                                                                                                                                                                                                                                                                                                                                                                                                                                                                                                                                                                                                                                                                                                                                                                                                                                                                                                                                                                                                                                                                                              |         |         |         |         |         |         |         |          |          |          |          |          |          |          |          |          |          |          |          |          |          |          |          |          |          |          |          |          |          |          |          |          |          |          |          |          |          |          |          |          |          |          |          |          |          |          |          |          |          |          |          |          |          |          |           |           |           |           |           |           |           |           |           |           |           |           |           |           |           |           |           |           |           |           |           |           |           |           |           |           |           |           |           |           |           |           |           |           |           |           |           |           |           |           |           |           |           |           |           |           |           |           |           |           |           |           |           |           |
| 117.0771          | 131.6877                                                                                                                                                                                                                                                                                                                                                                                                                                                                                                                                                                                                                                                                                                                                                                                                                                                                                                                                                                                                                                                                                                                                                                                                                                                                                                                                                                                                                                                                                                                                                                                                                                                                                                                                                                                                                                                                                                                                                                                                                                                                                                                                                                                                                                                                                                                                                                                                                                                                                                                                                                                  | 141.1578           |          |   |   |   |          |          |          |   |          |          |         |    |          |          |          |    |          |          |         |    |         |          |          |   |          |          |         |   |          |          |         |   |          |          |          |   |          |          |          |    |         |         |          |    |         |          |         |   |         |         |          |   |         |          |          |   |         |         |         |   |         |          |          |   |         |         |         |   |         |         |         |   |          |         |          |   |         |         |         |   |          |         |         |   |          |         |          |   |          |         |          |   |          |         |          |   |          |         |         |   |          |         |         |   |          |         |         |   |          |         |         |   |          |         |         |   |          |         |         |   |          |         |          |   |          |         |         |   |          |         |         |   |         |         |          |                                                                                                                                                                                                                                                                                                                                                                                                                                                                                                                                                                                                                                                                                                                                                                                                                                                                                                                                                                                                                                                                                                                                                                                                                                                                                                                                                                                                                                                                                                                                                                                                                                                                                                                                                                                                                                                                                                                                                                                                                                                                                                                                                                                                                                                                                                                                                                                                                                              |         |         |         |         |         |         |         |          |          |          |          |          |          |          |          |          |          |          |          |          |          |          |          |          |          |          |          |          |          |          |          |          |          |          |          |          |          |          |          |          |          |          |          |          |          |          |          |          |          |          |          |          |          |          |           |           |           |           |           |           |           |           |           |           |           |           |           |           |           |           |           |           |           |           |           |           |           |           |           |           |           |           |           |           |           |           |           |           |           |           |           |           |           |           |           |           |           |           |           |           |           |           |           |           |           |           |           |           |
| 151.6215          | 157.9176                                                                                                                                                                                                                                                                                                                                                                                                                                                                                                                                                                                                                                                                                                                                                                                                                                                                                                                                                                                                                                                                                                                                                                                                                                                                                                                                                                                                                                                                                                                                                                                                                                                                                                                                                                                                                                                                                                                                                                                                                                                                                                                                                                                                                                                                                                                                                                                                                                                                                                                                                                                  | 162.8508           |          |   |   |   |          |          |          |   |          |          |         |    |          |          |          |    |          |          |         |    |         |          |          |   |          |          |         |   |          |          |         |   |          |          |          |   |          |          |          |    |         |         |          |    |         |          |         |   |         |         |          |   |         |          |          |   |         |         |         |   |         |          |          |   |         |         |         |   |         |         |         |   |          |         |          |   |         |         |         |   |          |         |         |   |          |         |          |   |          |         |          |   |          |         |          |   |          |         |         |   |          |         |         |   |          |         |         |   |          |         |         |   |          |         |         |   |          |         |         |   |          |         |          |   |          |         |         |   |          |         |         |   |         |         |          |                                                                                                                                                                                                                                                                                                                                                                                                                                                                                                                                                                                                                                                                                                                                                                                                                                                                                                                                                                                                                                                                                                                                                                                                                                                                                                                                                                                                                                                                                                                                                                                                                                                                                                                                                                                                                                                                                                                                                                                                                                                                                                                                                                                                                                                                                                                                                                                                                                              |         |         |         |         |         |         |         |          |          |          |          |          |          |          |          |          |          |          |          |          |          |          |          |          |          |          |          |          |          |          |          |          |          |          |          |          |          |          |          |          |          |          |          |          |          |          |          |          |          |          |          |          |          |          |           |           |           |           |           |           |           |           |           |           |           |           |           |           |           |           |           |           |           |           |           |           |           |           |           |           |           |           |           |           |           |           |           |           |           |           |           |           |           |           |           |           |           |           |           |           |           |           |           |           |           |           |           |           |
| 167.0023          | 168.9846                                                                                                                                                                                                                                                                                                                                                                                                                                                                                                                                                                                                                                                                                                                                                                                                                                                                                                                                                                                                                                                                                                                                                                                                                                                                                                                                                                                                                                                                                                                                                                                                                                                                                                                                                                                                                                                                                                                                                                                                                                                                                                                                                                                                                                                                                                                                                                                                                                                                                                                                                                                  | 181.3951           |          |   |   |   |          |          |          |   |          |          |         |    |          |          |          |    |          |          |         |    |         |          |          |   |          |          |         |   |          |          |         |   |          |          |          |   |          |          |          |    |         |         |          |    |         |          |         |   |         |         |          |   |         |          |          |   |         |         |         |   |         |          |          |   |         |         |         |   |         |         |         |   |          |         |          |   |         |         |         |   |          |         |         |   |          |         |          |   |          |         |          |   |          |         |          |   |          |         |         |   |          |         |         |   |          |         |         |   |          |         |         |   |          |         |         |   |          |         |         |   |          |         |          |   |          |         |         |   |          |         |         |   |         |         |          |                                                                                                                                                                                                                                                                                                                                                                                                                                                                                                                                                                                                                                                                                                                                                                                                                                                                                                                                                                                                                                                                                                                                                                                                                                                                                                                                                                                                                                                                                                                                                                                                                                                                                                                                                                                                                                                                                                                                                                                                                                                                                                                                                                                                                                                                                                                                                                                                                                              |         |         |         |         |         |         |         |          |          |          |          |          |          |          |          |          |          |          |          |          |          |          |          |          |          |          |          |          |          |          |          |          |          |          |          |          |          |          |          |          |          |          |          |          |          |          |          |          |          |          |          |          |          |          |           |           |           |           |           |           |           |           |           |           |           |           |           |           |           |           |           |           |           |           |           |           |           |           |           |           |           |           |           |           |           |           |           |           |           |           |           |           |           |           |           |           |           |           |           |           |           |           |           |           |           |           |           |           |
| 190.6675          | 194.7787                                                                                                                                                                                                                                                                                                                                                                                                                                                                                                                                                                                                                                                                                                                                                                                                                                                                                                                                                                                                                                                                                                                                                                                                                                                                                                                                                                                                                                                                                                                                                                                                                                                                                                                                                                                                                                                                                                                                                                                                                                                                                                                                                                                                                                                                                                                                                                                                                                                                                                                                                                                  | 207.9561           |          |   |   |   |          |          |          |   |          |          |         |    |          |          |          |    |          |          |         |    |         |          |          |   |          |          |         |   |          |          |         |   |          |          |          |   |          |          |          |    |         |         |          |    |         |          |         |   |         |         |          |   |         |          |          |   |         |         |         |   |         |          |          |   |         |         |         |   |         |         |         |   |          |         |          |   |         |         |         |   |          |         |         |   |          |         |          |   |          |         |          |   |          |         |          |   |          |         |         |   |          |         |         |   |          |         |         |   |          |         |         |   |          |         |         |   |          |         |         |   |          |         |          |   |          |         |         |   |          |         |         |   |         |         |          |                                                                                                                                                                                                                                                                                                                                                                                                                                                                                                                                                                                                                                                                                                                                                                                                                                                                                                                                                                                                                                                                                                                                                                                                                                                                                                                                                                                                                                                                                                                                                                                                                                                                                                                                                                                                                                                                                                                                                                                                                                                                                                                                                                                                                                                                                                                                                                                                                                              |         |         |         |         |         |         |         |          |          |          |          |          |          |          |          |          |          |          |          |          |          |          |          |          |          |          |          |          |          |          |          |          |          |          |          |          |          |          |          |          |          |          |          |          |          |          |          |          |          |          |          |          |          |          |           |           |           |           |           |           |           |           |           |           |           |           |           |           |           |           |           |           |           |           |           |           |           |           |           |           |           |           |           |           |           |           |           |           |           |           |           |           |           |           |           |           |           |           |           |           |           |           |           |           |           |           |           |           |
| 223.8587          | 235.0827                                                                                                                                                                                                                                                                                                                                                                                                                                                                                                                                                                                                                                                                                                                                                                                                                                                                                                                                                                                                                                                                                                                                                                                                                                                                                                                                                                                                                                                                                                                                                                                                                                                                                                                                                                                                                                                                                                                                                                                                                                                                                                                                                                                                                                                                                                                                                                                                                                                                                                                                                                                  | 257.7737           |          |   |   |   |          |          |          |   |          |          |         |    |          |          |          |    |          |          |         |    |         |          |          |   |          |          |         |   |          |          |         |   |          |          |          |   |          |          |          |    |         |         |          |    |         |          |         |   |         |         |          |   |         |          |          |   |         |         |         |   |         |          |          |   |         |         |         |   |         |         |         |   |          |         |          |   |         |         |         |   |          |         |         |   |          |         |          |   |          |         |          |   |          |         |          |   |          |         |         |   |          |         |         |   |          |         |         |   |          |         |         |   |          |         |         |   |          |         |         |   |          |         |          |   |          |         |         |   |          |         |         |   |         |         |          |                                                                                                                                                                                                                                                                                                                                                                                                                                                                                                                                                                                                                                                                                                                                                                                                                                                                                                                                                                                                                                                                                                                                                                                                                                                                                                                                                                                                                                                                                                                                                                                                                                                                                                                                                                                                                                                                                                                                                                                                                                                                                                                                                                                                                                                                                                                                                                                                                                              |         |         |         |         |         |         |         |          |          |          |          |          |          |          |          |          |          |          |          |          |          |          |          |          |          |          |          |          |          |          |          |          |          |          |          |          |          |          |          |          |          |          |          |          |          |          |          |          |          |          |          |          |          |          |           |           |           |           |           |           |           |           |           |           |           |           |           |           |           |           |           |           |           |           |           |           |           |           |           |           |           |           |           |           |           |           |           |           |           |           |           |           |           |           |           |           |           |           |           |           |           |           |           |           |           |           |           |           |
| 261.5426          | 273.6724                                                                                                                                                                                                                                                                                                                                                                                                                                                                                                                                                                                                                                                                                                                                                                                                                                                                                                                                                                                                                                                                                                                                                                                                                                                                                                                                                                                                                                                                                                                                                                                                                                                                                                                                                                                                                                                                                                                                                                                                                                                                                                                                                                                                                                                                                                                                                                                                                                                                                                                                                                                  | 281.5196           |          |   |   |   |          |          |          |   |          |          |         |    |          |          |          |    |          |          |         |    |         |          |          |   |          |          |         |   |          |          |         |   |          |          |          |   |          |          |          |    |         |         |          |    |         |          |         |   |         |         |          |   |         |          |          |   |         |         |         |   |         |          |          |   |         |         |         |   |         |         |         |   |          |         |          |   |         |         |         |   |          |         |         |   |          |         |          |   |          |         |          |   |          |         |          |   |          |         |         |   |          |         |         |   |          |         |         |   |          |         |         |   |          |         |         |   |          |         |         |   |          |         |          |   |          |         |         |   |          |         |         |   |         |         |          |                                                                                                                                                                                                                                                                                                                                                                                                                                                                                                                                                                                                                                                                                                                                                                                                                                                                                                                                                                                                                                                                                                                                                                                                                                                                                                                                                                                                                                                                                                                                                                                                                                                                                                                                                                                                                                                                                                                                                                                                                                                                                                                                                                                                                                                                                                                                                                                                                                              |         |         |         |         |         |         |         |          |          |          |          |          |          |          |          |          |          |          |          |          |          |          |          |          |          |          |          |          |          |          |          |          |          |          |          |          |          |          |          |          |          |          |          |          |          |          |          |          |          |          |          |          |          |          |           |           |           |           |           |           |           |           |           |           |           |           |           |           |           |           |           |           |           |           |           |           |           |           |           |           |           |           |           |           |           |           |           |           |           |           |           |           |           |           |           |           |           |           |           |           |           |           |           |           |           |           |           |           |
| 297.2082          | 307.3270                                                                                                                                                                                                                                                                                                                                                                                                                                                                                                                                                                                                                                                                                                                                                                                                                                                                                                                                                                                                                                                                                                                                                                                                                                                                                                                                                                                                                                                                                                                                                                                                                                                                                                                                                                                                                                                                                                                                                                                                                                                                                                                                                                                                                                                                                                                                                                                                                                                                                                                                                                                  | 311.0070           |          |   |   |   |          |          |          |   |          |          |         |    |          |          |          |    |          |          |         |    |         |          |          |   |          |          |         |   |          |          |         |   |          |          |          |   |          |          |          |    |         |         |          |    |         |          |         |   |         |         |          |   |         |          |          |   |         |         |         |   |         |          |          |   |         |         |         |   |         |         |         |   |          |         |          |   |         |         |         |   |          |         |         |   |          |         |          |   |          |         |          |   |          |         |          |   |          |         |         |   |          |         |         |   |          |         |         |   |          |         |         |   |          |         |         |   |          |         |         |   |          |         |          |   |          |         |         |   |          |         |         |   |         |         |          |                                                                                                                                                                                                                                                                                                                                                                                                                                                                                                                                                                                                                                                                                                                                                                                                                                                                                                                                                                                                                                                                                                                                                                                                                                                                                                                                                                                                                                                                                                                                                                                                                                                                                                                                                                                                                                                                                                                                                                                                                                                                                                                                                                                                                                                                                                                                                                                                                                              |         |         |         |         |         |         |         |          |          |          |          |          |          |          |          |          |          |          |          |          |          |          |          |          |          |          |          |          |          |          |          |          |          |          |          |          |          |          |          |          |          |          |          |          |          |          |          |          |          |          |          |          |          |          |           |           |           |           |           |           |           |           |           |           |           |           |           |           |           |           |           |           |           |           |           |           |           |           |           |           |           |           |           |           |           |           |           |           |           |           |           |           |           |           |           |           |           |           |           |           |           |           |           |           |           |           |           |           |
| 325.5623          | 336.3071                                                                                                                                                                                                                                                                                                                                                                                                                                                                                                                                                                                                                                                                                                                                                                                                                                                                                                                                                                                                                                                                                                                                                                                                                                                                                                                                                                                                                                                                                                                                                                                                                                                                                                                                                                                                                                                                                                                                                                                                                                                                                                                                                                                                                                                                                                                                                                                                                                                                                                                                                                                  | 354.7714           |          |   |   |   |          |          |          |   |          |          |         |    |          |          |          |    |          |          |         |    |         |          |          |   |          |          |         |   |          |          |         |   |          |          |          |   |          |          |          |    |         |         |          |    |         |          |         |   |         |         |          |   |         |          |          |   |         |         |         |   |         |          |          |   |         |         |         |   |         |         |         |   |          |         |          |   |         |         |         |   |          |         |         |   |          |         |          |   |          |         |          |   |          |         |          |   |          |         |         |   |          |         |         |   |          |         |         |   |          |         |         |   |          |         |         |   |          |         |         |   |          |         |          |   |          |         |         |   |          |         |         |   |         |         |          |                                                                                                                                                                                                                                                                                                                                                                                                                                                                                                                                                                                                                                                                                                                                                                                                                                                                                                                                                                                                                                                                                                                                                                                                                                                                                                                                                                                                                                                                                                                                                                                                                                                                                                                                                                                                                                                                                                                                                                                                                                                                                                                                                                                                                                                                                                                                                                                                                                              |         |         |         |         |         |         |         |          |          |          |          |          |          |          |          |          |          |          |          |          |          |          |          |          |          |          |          |          |          |          |          |          |          |          |          |          |          |          |          |          |          |          |          |          |          |          |          |          |          |          |          |          |          |          |           |           |           |           |           |           |           |           |           |           |           |           |           |           |           |           |           |           |           |           |           |           |           |           |           |           |           |           |           |           |           |           |           |           |           |           |           |           |           |           |           |           |           |           |           |           |           |           |           |           |           |           |           |           |
| 378.5370          | 419.2703                                                                                                                                                                                                                                                                                                                                                                                                                                                                                                                                                                                                                                                                                                                                                                                                                                                                                                                                                                                                                                                                                                                                                                                                                                                                                                                                                                                                                                                                                                                                                                                                                                                                                                                                                                                                                                                                                                                                                                                                                                                                                                                                                                                                                                                                                                                                                                                                                                                                                                                                                                                  | 421.7480           |          |   |   |   |          |          |          |   |          |          |         |    |          |          |          |    |          |          |         |    |         |          |          |   |          |          |         |   |          |          |         |   |          |          |          |   |          |          |          |    |         |         |          |    |         |          |         |   |         |         |          |   |         |          |          |   |         |         |         |   |         |          |          |   |         |         |         |   |         |         |         |   |          |         |          |   |         |         |         |   |          |         |         |   |          |         |          |   |          |         |          |   |          |         |          |   |          |         |         |   |          |         |         |   |          |         |         |   |          |         |         |   |          |         |         |   |          |         |         |   |          |         |          |   |          |         |         |   |          |         |         |   |         |         |          |                                                                                                                                                                                                                                                                                                                                                                                                                                                                                                                                                                                                                                                                                                                                                                                                                                                                                                                                                                                                                                                                                                                                                                                                                                                                                                                                                                                                                                                                                                                                                                                                                                                                                                                                                                                                                                                                                                                                                                                                                                                                                                                                                                                                                                                                                                                                                                                                                                              |         |         |         |         |         |         |         |          |          |          |          |          |          |          |          |          |          |          |          |          |          |          |          |          |          |          |          |          |          |          |          |          |          |          |          |          |          |          |          |          |          |          |          |          |          |          |          |          |          |          |          |          |          |          |           |           |           |           |           |           |           |           |           |           |           |           |           |           |           |           |           |           |           |           |           |           |           |           |           |           |           |           |           |           |           |           |           |           |           |           |           |           |           |           |           |           |           |           |           |           |           |           |           |           |           |           |           |           |
| 463.5170          | 506.1900                                                                                                                                                                                                                                                                                                                                                                                                                                                                                                                                                                                                                                                                                                                                                                                                                                                                                                                                                                                                                                                                                                                                                                                                                                                                                                                                                                                                                                                                                                                                                                                                                                                                                                                                                                                                                                                                                                                                                                                                                                                                                                                                                                                                                                                                                                                                                                                                                                                                                                                                                                                  | 542.5134           |          |   |   |   |          |          |          |   |          |          |         |    |          |          |          |    |          |          |         |    |         |          |          |   |          |          |         |   |          |          |         |   |          |          |          |   |          |          |          |    |         |         |          |    |         |          |         |   |         |         |          |   |         |          |          |   |         |         |         |   |         |          |          |   |         |         |         |   |         |         |         |   |          |         |          |   |         |         |         |   |          |         |         |   |          |         |          |   |          |         |          |   |          |         |          |   |          |         |         |   |          |         |         |   |          |         |         |   |          |         |         |   |          |         |         |   |          |         |         |   |          |         |          |   |          |         |         |   |          |         |         |   |         |         |          |                                                                                                                                                                                                                                                                                                                                                                                                                                                                                                                                                                                                                                                                                                                                                                                                                                                                                                                                                                                                                                                                                                                                                                                                                                                                                                                                                                                                                                                                                                                                                                                                                                                                                                                                                                                                                                                                                                                                                                                                                                                                                                                                                                                                                                                                                                                                                                                                                                              |         |         |         |         |         |         |         |          |          |          |          |          |          |          |          |          |          |          |          |          |          |          |          |          |          |          |          |          |          |          |          |          |          |          |          |          |          |          |          |          |          |          |          |          |          |          |          |          |          |          |          |          |          |          |           |           |           |           |           |           |           |           |           |           |           |           |           |           |           |           |           |           |           |           |           |           |           |           |           |           |           |           |           |           |           |           |           |           |           |           |           |           |           |           |           |           |           |           |           |           |           |           |           |           |           |           |           |           |
| 598.1826          | 661.2053                                                                                                                                                                                                                                                                                                                                                                                                                                                                                                                                                                                                                                                                                                                                                                                                                                                                                                                                                                                                                                                                                                                                                                                                                                                                                                                                                                                                                                                                                                                                                                                                                                                                                                                                                                                                                                                                                                                                                                                                                                                                                                                                                                                                                                                                                                                                                                                                                                                                                                                                                                                  | 707.7977           |          |   |   |   |          |          |          |   |          |          |         |    |          |          |          |    |          |          |         |    |         |          |          |   |          |          |         |   |          |          |         |   |          |          |          |   |          |          |          |    |         |         |          |    |         |          |         |   |         |         |          |   |         |          |          |   |         |         |         |   |         |          |          |   |         |         |         |   |         |         |         |   |          |         |          |   |         |         |         |   |          |         |         |   |          |         |          |   |          |         |          |   |          |         |          |   |          |         |         |   |          |         |         |   |          |         |         |   |          |         |         |   |          |         |         |   |          |         |         |   |          |         |          |   |          |         |         |   |          |         |         |   |         |         |          |                                                                                                                                                                                                                                                                                                                                                                                                                                                                                                                                                                                                                                                                                                                                                                                                                                                                                                                                                                                                                                                                                                                                                                                                                                                                                                                                                                                                                                                                                                                                                                                                                                                                                                                                                                                                                                                                                                                                                                                                                                                                                                                                                                                                                                                                                                                                                                                                                                              |         |         |         |         |         |         |         |          |          |          |          |          |          |          |          |          |          |          |          |          |          |          |          |          |          |          |          |          |          |          |          |          |          |          |          |          |          |          |          |          |          |          |          |          |          |          |          |          |          |          |          |          |          |          |           |           |           |           |           |           |           |           |           |           |           |           |           |           |           |           |           |           |           |           |           |           |           |           |           |           |           |           |           |           |           |           |           |           |           |           |           |           |           |           |           |           |           |           |           |           |           |           |           |           |           |           |           |           |
| 731.5667          | 778.7552                                                                                                                                                                                                                                                                                                                                                                                                                                                                                                                                                                                                                                                                                                                                                                                                                                                                                                                                                                                                                                                                                                                                                                                                                                                                                                                                                                                                                                                                                                                                                                                                                                                                                                                                                                                                                                                                                                                                                                                                                                                                                                                                                                                                                                                                                                                                                                                                                                                                                                                                                                                  | 816.4061           |          |   |   |   |          |          |          |   |          |          |         |    |          |          |          |    |          |          |         |    |         |          |          |   |          |          |         |   |          |          |         |   |          |          |          |   |          |          |          |    |         |         |          |    |         |          |         |   |         |         |          |   |         |          |          |   |         |         |         |   |         |          |          |   |         |         |         |   |         |         |         |   |          |         |          |   |         |         |         |   |          |         |         |   |          |         |          |   |          |         |          |   |          |         |          |   |          |         |         |   |          |         |         |   |          |         |         |   |          |         |         |   |          |         |         |   |          |         |         |   |          |         |          |   |          |         |         |   |          |         |         |   |         |         |          |                                                                                                                                                                                                                                                                                                                                                                                                                                                                                                                                                                                                                                                                                                                                                                                                                                                                                                                                                                                                                                                                                                                                                                                                                                                                                                                                                                                                                                                                                                                                                                                                                                                                                                                                                                                                                                                                                                                                                                                                                                                                                                                                                                                                                                                                                                                                                                                                                                              |         |         |         |         |         |         |         |          |          |          |          |          |          |          |          |          |          |          |          |          |          |          |          |          |          |          |          |          |          |          |          |          |          |          |          |          |          |          |          |          |          |          |          |          |          |          |          |          |          |          |          |          |          |          |           |           |           |           |           |           |           |           |           |           |           |           |           |           |           |           |           |           |           |           |           |           |           |           |           |           |           |           |           |           |           |           |           |           |           |           |           |           |           |           |           |           |           |           |           |           |           |           |           |           |           |           |           |           |
| 844.3239          | 846.0107                                                                                                                                                                                                                                                                                                                                                                                                                                                                                                                                                                                                                                                                                                                                                                                                                                                                                                                                                                                                                                                                                                                                                                                                                                                                                                                                                                                                                                                                                                                                                                                                                                                                                                                                                                                                                                                                                                                                                                                                                                                                                                                                                                                                                                                                                                                                                                                                                                                                                                                                                                                  | 847.0710           |          |   |   |   |          |          |          |   |          |          |         |    |          |          |          |    |          |          |         |    |         |          |          |   |          |          |         |   |          |          |         |   |          |          |          |   |          |          |          |    |         |         |          |    |         |          |         |   |         |         |          |   |         |          |          |   |         |         |         |   |         |          |          |   |         |         |         |   |         |         |         |   |          |         |          |   |         |         |         |   |          |         |         |   |          |         |          |   |          |         |          |   |          |         |          |   |          |         |         |   |          |         |         |   |          |         |         |   |          |         |         |   |          |         |         |   |          |         |         |   |          |         |          |   |          |         |         |   |          |         |         |   |         |         |          |                                                                                                                                                                                                                                                                                                                                                                                                                                                                                                                                                                                                                                                                                                                                                                                                                                                                                                                                                                                                                                                                                                                                                                                                                                                                                                                                                                                                                                                                                                                                                                                                                                                                                                                                                                                                                                                                                                                                                                                                                                                                                                                                                                                                                                                                                                                                                                                                                                              |         |         |         |         |         |         |         |          |          |          |          |          |          |          |          |          |          |          |          |          |          |          |          |          |          |          |          |          |          |          |          |          |          |          |          |          |          |          |          |          |          |          |          |          |          |          |          |          |          |          |          |          |          |          |           |           |           |           |           |           |           |           |           |           |           |           |           |           |           |           |           |           |           |           |           |           |           |           |           |           |           |           |           |           |           |           |           |           |           |           |           |           |           |           |           |           |           |           |           |           |           |           |           |           |           |           |           |           |
| 864.4592          | 878.3872                                                                                                                                                                                                                                                                                                                                                                                                                                                                                                                                                                                                                                                                                                                                                                                                                                                                                                                                                                                                                                                                                                                                                                                                                                                                                                                                                                                                                                                                                                                                                                                                                                                                                                                                                                                                                                                                                                                                                                                                                                                                                                                                                                                                                                                                                                                                                                                                                                                                                                                                                                                  | 925.9442           |          |   |   |   |          |          |          |   |          |          |         |    |          |          |          |    |          |          |         |    |         |          |          |   |          |          |         |   |          |          |         |   |          |          |          |   |          |          |          |    |         |         |          |    |         |          |         |   |         |         |          |   |         |          |          |   |         |         |         |   |         |          |          |   |         |         |         |   |         |         |         |   |          |         |          |   |         |         |         |   |          |         |         |   |          |         |          |   |          |         |          |   |          |         |          |   |          |         |         |   |          |         |         |   |          |         |         |   |          |         |         |   |          |         |         |   |          |         |         |   |          |         |          |   |          |         |         |   |          |         |         |   |         |         |          |                                                                                                                                                                                                                                                                                                                                                                                                                                                                                                                                                                                                                                                                                                                                                                                                                                                                                                                                                                                                                                                                                                                                                                                                                                                                                                                                                                                                                                                                                                                                                                                                                                                                                                                                                                                                                                                                                                                                                                                                                                                                                                                                                                                                                                                                                                                                                                                                                                              |         |         |         |         |         |         |         |          |          |          |          |          |          |          |          |          |          |          |          |          |          |          |          |          |          |          |          |          |          |          |          |          |          |          |          |          |          |          |          |          |          |          |          |          |          |          |          |          |          |          |          |          |          |          |           |           |           |           |           |           |           |           |           |           |           |           |           |           |           |           |           |           |           |           |           |           |           |           |           |           |           |           |           |           |           |           |           |           |           |           |           |           |           |           |           |           |           |           |           |           |           |           |           |           |           |           |           |           |
| 931.1219          | 958.0147                                                                                                                                                                                                                                                                                                                                                                                                                                                                                                                                                                                                                                                                                                                                                                                                                                                                                                                                                                                                                                                                                                                                                                                                                                                                                                                                                                                                                                                                                                                                                                                                                                                                                                                                                                                                                                                                                                                                                                                                                                                                                                                                                                                                                                                                                                                                                                                                                                                                                                                                                                                  | 985.3494           |          |   |   |   |          |          |          |   |          |          |         |    |          |          |          |    |          |          |         |    |         |          |          |   |          |          |         |   |          |          |         |   |          |          |          |   |          |          |          |    |         |         |          |    |         |          |         |   |         |         |          |   |         |          |          |   |         |         |         |   |         |          |          |   |         |         |         |   |         |         |         |   |          |         |          |   |         |         |         |   |          |         |         |   |          |         |          |   |          |         |          |   |          |         |          |   |          |         |         |   |          |         |         |   |          |         |         |   |          |         |         |   |          |         |         |   |          |         |         |   |          |         |          |   |          |         |         |   |          |         |         |   |         |         |          |                                                                                                                                                                                                                                                                                                                                                                                                                                                                                                                                                                                                                                                                                                                                                                                                                                                                                                                                                                                                                                                                                                                                                                                                                                                                                                                                                                                                                                                                                                                                                                                                                                                                                                                                                                                                                                                                                                                                                                                                                                                                                                                                                                                                                                                                                                                                                                                                                                              |         |         |         |         |         |         |         |          |          |          |          |          |          |          |          |          |          |          |          |          |          |          |          |          |          |          |          |          |          |          |          |          |          |          |          |          |          |          |          |          |          |          |          |          |          |          |          |          |          |          |          |          |          |          |           |           |           |           |           |           |           |           |           |           |           |           |           |           |           |           |           |           |           |           |           |           |           |           |           |           |           |           |           |           |           |           |           |           |           |           |           |           |           |           |           |           |           |           |           |           |           |           |           |           |           |           |           |           |
| 1000.6043         | 1016.6222                                                                                                                                                                                                                                                                                                                                                                                                                                                                                                                                                                                                                                                                                                                                                                                                                                                                                                                                                                                                                                                                                                                                                                                                                                                                                                                                                                                                                                                                                                                                                                                                                                                                                                                                                                                                                                                                                                                                                                                                                                                                                                                                                                                                                                                                                                                                                                                                                                                                                                                                                                                 | 1029.9746          |          |   |   |   |          |          |          |   |          |          |         |    |          |          |          |    |          |          |         |    |         |          |          |   |          |          |         |   |          |          |         |   |          |          |          |   |          |          |          |    |         |         |          |    |         |          |         |   |         |         |          |   |         |          |          |   |         |         |         |   |         |          |          |   |         |         |         |   |         |         |         |   |          |         |          |   |         |         |         |   |          |         |         |   |          |         |          |   |          |         |          |   |          |         |          |   |          |         |         |   |          |         |         |   |          |         |         |   |          |         |         |   |          |         |         |   |          |         |         |   |          |         |          |   |          |         |         |   |          |         |         |   |         |         |          |                                                                                                                                                                                                                                                                                                                                                                                                                                                                                                                                                                                                                                                                                                                                                                                                                                                                                                                                                                                                                                                                                                                                                                                                                                                                                                                                                                                                                                                                                                                                                                                                                                                                                                                                                                                                                                                                                                                                                                                                                                                                                                                                                                                                                                                                                                                                                                                                                                              |         |         |         |         |         |         |         |          |          |          |          |          |          |          |          |          |          |          |          |          |          |          |          |          |          |          |          |          |          |          |          |          |          |          |          |          |          |          |          |          |          |          |          |          |          |          |          |          |          |          |          |          |          |          |           |           |           |           |           |           |           |           |           |           |           |           |           |           |           |           |           |           |           |           |           |           |           |           |           |           |           |           |           |           |           |           |           |           |           |           |           |           |           |           |           |           |           |           |           |           |           |           |           |           |           |           |           |           |
| 1042.9700         | 1045.4536                                                                                                                                                                                                                                                                                                                                                                                                                                                                                                                                                                                                                                                                                                                                                                                                                                                                                                                                                                                                                                                                                                                                                                                                                                                                                                                                                                                                                                                                                                                                                                                                                                                                                                                                                                                                                                                                                                                                                                                                                                                                                                                                                                                                                                                                                                                                                                                                                                                                                                                                                                                 | 1048.6198          |          |   |   |   |          |          |          |   |          |          |         |    |          |          |          |    |          |          |         |    |         |          |          |   |          |          |         |   |          |          |         |   |          |          |          |   |          |          |          |    |         |         |          |    |         |          |         |   |         |         |          |   |         |          |          |   |         |         |         |   |         |          |          |   |         |         |         |   |         |         |         |   |          |         |          |   |         |         |         |   |          |         |         |   |          |         |          |   |          |         |          |   |          |         |          |   |          |         |         |   |          |         |         |   |          |         |         |   |          |         |         |   |          |         |         |   |          |         |         |   |          |         |          |   |          |         |         |   |          |         |         |   |         |         |          |                                                                                                                                                                                                                                                                                                                                                                                                                                                                                                                                                                                                                                                                                                                                                                                                                                                                                                                                                                                                                                                                                                                                                                                                                                                                                                                                                                                                                                                                                                                                                                                                                                                                                                                                                                                                                                                                                                                                                                                                                                                                                                                                                                                                                                                                                                                                                                                                                                              |         |         |         |         |         |         |         |          |          |          |          |          |          |          |          |          |          |          |          |          |          |          |          |          |          |          |          |          |          |          |          |          |          |          |          |          |          |          |          |          |          |          |          |          |          |          |          |          |          |          |          |          |          |          |           |           |           |           |           |           |           |           |           |           |           |           |           |           |           |           |           |           |           |           |           |           |           |           |           |           |           |           |           |           |           |           |           |           |           |           |           |           |           |           |           |           |           |           |           |           |           |           |           |           |           |           |           |           |
| 1057.7256         | 1063.4635                                                                                                                                                                                                                                                                                                                                                                                                                                                                                                                                                                                                                                                                                                                                                                                                                                                                                                                                                                                                                                                                                                                                                                                                                                                                                                                                                                                                                                                                                                                                                                                                                                                                                                                                                                                                                                                                                                                                                                                                                                                                                                                                                                                                                                                                                                                                                                                                                                                                                                                                                                                 | 1072.0772          |          |   |   |   |          |          |          |   |          |          |         |    |          |          |          |    |          |          |         |    |         |          |          |   |          |          |         |   |          |          |         |   |          |          |          |   |          |          |          |    |         |         |          |    |         |          |         |   |         |         |          |   |         |          |          |   |         |         |         |   |         |          |          |   |         |         |         |   |         |         |         |   |          |         |          |   |         |         |         |   |          |         |         |   |          |         |          |   |          |         |          |   |          |         |          |   |          |         |         |   |          |         |         |   |          |         |         |   |          |         |         |   |          |         |         |   |          |         |         |   |          |         |          |   |          |         |         |   |          |         |         |   |         |         |          |                                                                                                                                                                                                                                                                                                                                                                                                                                                                                                                                                                                                                                                                                                                                                                                                                                                                                                                                                                                                                                                                                                                                                                                                                                                                                                                                                                                                                                                                                                                                                                                                                                                                                                                                                                                                                                                                                                                                                                                                                                                                                                                                                                                                                                                                                                                                                                                                                                              |         |         |         |         |         |         |         |          |          |          |          |          |          |          |          |          |          |          |          |          |          |          |          |          |          |          |          |          |          |          |          |          |          |          |          |          |          |          |          |          |          |          |          |          |          |          |          |          |          |          |          |          |          |          |           |           |           |           |           |           |           |           |           |           |           |           |           |           |           |           |           |           |           |           |           |           |           |           |           |           |           |           |           |           |           |           |           |           |           |           |           |           |           |           |           |           |           |           |           |           |           |           |           |           |           |           |           |           |
| 1086.7668         | 1107.0907                                                                                                                                                                                                                                                                                                                                                                                                                                                                                                                                                                                                                                                                                                                                                                                                                                                                                                                                                                                                                                                                                                                                                                                                                                                                                                                                                                                                                                                                                                                                                                                                                                                                                                                                                                                                                                                                                                                                                                                                                                                                                                                                                                                                                                                                                                                                                                                                                                                                                                                                                                                 | 1161.4795          |          |   |   |   |          |          |          |   |          |          |         |    |          |          |          |    |          |          |         |    |         |          |          |   |          |          |         |   |          |          |         |   |          |          |          |   |          |          |          |    |         |         |          |    |         |          |         |   |         |         |          |   |         |          |          |   |         |         |         |   |         |          |          |   |         |         |         |   |         |         |         |   |          |         |          |   |         |         |         |   |          |         |         |   |          |         |          |   |          |         |          |   |          |         |          |   |          |         |         |   |          |         |         |   |          |         |         |   |          |         |         |   |          |         |         |   |          |         |         |   |          |         |          |   |          |         |         |   |          |         |         |   |         |         |          |                                                                                                                                                                                                                                                                                                                                                                                                                                                                                                                                                                                                                                                                                                                                                                                                                                                                                                                                                                                                                                                                                                                                                                                                                                                                                                                                                                                                                                                                                                                                                                                                                                                                                                                                                                                                                                                                                                                                                                                                                                                                                                                                                                                                                                                                                                                                                                                                                                              |         |         |         |         |         |         |         |          |          |          |          |          |          |          |          |          |          |          |          |          |          |          |          |          |          |          |          |          |          |          |          |          |          |          |          |          |          |          |          |          |          |          |          |          |          |          |          |          |          |          |          |          |          |          |           |           |           |           |           |           |           |           |           |           |           |           |           |           |           |           |           |           |           |           |           |           |           |           |           |           |           |           |           |           |           |           |           |           |           |           |           |           |           |           |           |           |           |           |           |           |           |           |           |           |           |           |           |           |
| 1183.4392         | 1199.1290                                                                                                                                                                                                                                                                                                                                                                                                                                                                                                                                                                                                                                                                                                                                                                                                                                                                                                                                                                                                                                                                                                                                                                                                                                                                                                                                                                                                                                                                                                                                                                                                                                                                                                                                                                                                                                                                                                                                                                                                                                                                                                                                                                                                                                                                                                                                                                                                                                                                                                                                                                                 | 1218.9225          |          |   |   |   |          |          |          |   |          |          |         |    |          |          |          |    |          |          |         |    |         |          |          |   |          |          |         |   |          |          |         |   |          |          |          |   |          |          |          |    |         |         |          |    |         |          |         |   |         |         |          |   |         |          |          |   |         |         |         |   |         |          |          |   |         |         |         |   |         |         |         |   |          |         |          |   |         |         |         |   |          |         |         |   |          |         |          |   |          |         |          |   |          |         |          |   |          |         |         |   |          |         |         |   |          |         |         |   |          |         |         |   |          |         |         |   |          |         |         |   |          |         |          |   |          |         |         |   |          |         |         |   |         |         |          |                                                                                                                                                                                                                                                                                                                                                                                                                                                                                                                                                                                                                                                                                                                                                                                                                                                                                                                                                                                                                                                                                                                                                                                                                                                                                                                                                                                                                                                                                                                                                                                                                                                                                                                                                                                                                                                                                                                                                                                                                                                                                                                                                                                                                                                                                                                                                                                                                                              |         |         |         |         |         |         |         |          |          |          |          |          |          |          |          |          |          |          |          |          |          |          |          |          |          |          |          |          |          |          |          |          |          |          |          |          |          |          |          |          |          |          |          |          |          |          |          |          |          |          |          |          |          |          |           |           |           |           |           |           |           |           |           |           |           |           |           |           |           |           |           |           |           |           |           |           |           |           |           |           |           |           |           |           |           |           |           |           |           |           |           |           |           |           |           |           |           |           |           |           |           |           |           |           |           |           |           |           |
| 1246.4760         | 1248.6889                                                                                                                                                                                                                                                                                                                                                                                                                                                                                                                                                                                                                                                                                                                                                                                                                                                                                                                                                                                                                                                                                                                                                                                                                                                                                                                                                                                                                                                                                                                                                                                                                                                                                                                                                                                                                                                                                                                                                                                                                                                                                                                                                                                                                                                                                                                                                                                                                                                                                                                                                                                 | 1260.4984          |          |   |   |   |          |          |          |   |          |          |         |    |          |          |          |    |          |          |         |    |         |          |          |   |          |          |         |   |          |          |         |   |          |          |          |   |          |          |          |    |         |         |          |    |         |          |         |   |         |         |          |   |         |          |          |   |         |         |         |   |         |          |          |   |         |         |         |   |         |         |         |   |          |         |          |   |         |         |         |   |          |         |         |   |          |         |          |   |          |         |          |   |          |         |          |   |          |         |         |   |          |         |         |   |          |         |         |   |          |         |         |   |          |         |         |   |          |         |         |   |          |         |          |   |          |         |         |   |          |         |         |   |         |         |          |                                                                                                                                                                                                                                                                                                                                                                                                                                                                                                                                                                                                                                                                                                                                                                                                                                                                                                                                                                                                                                                                                                                                                                                                                                                                                                                                                                                                                                                                                                                                                                                                                                                                                                                                                                                                                                                                                                                                                                                                                                                                                                                                                                                                                                                                                                                                                                                                                                              |         |         |         |         |         |         |         |          |          |          |          |          |          |          |          |          |          |          |          |          |          |          |          |          |          |          |          |          |          |          |          |          |          |          |          |          |          |          |          |          |          |          |          |          |          |          |          |          |          |          |          |          |          |          |           |           |           |           |           |           |           |           |           |           |           |           |           |           |           |           |           |           |           |           |           |           |           |           |           |           |           |           |           |           |           |           |           |           |           |           |           |           |           |           |           |           |           |           |           |           |           |           |           |           |           |           |           |           |
| 1279.8136         | 1316.6057                                                                                                                                                                                                                                                                                                                                                                                                                                                                                                                                                                                                                                                                                                                                                                                                                                                                                                                                                                                                                                                                                                                                                                                                                                                                                                                                                                                                                                                                                                                                                                                                                                                                                                                                                                                                                                                                                                                                                                                                                                                                                                                                                                                                                                                                                                                                                                                                                                                                                                                                                                                 | 1331.6988          |          |   |   |   |          |          |          |   |          |          |         |    |          |          |          |    |          |          |         |    |         |          |          |   |          |          |         |   |          |          |         |   |          |          |          |   |          |          |          |    |         |         |          |    |         |          |         |   |         |         |          |   |         |          |          |   |         |         |         |   |         |          |          |   |         |         |         |   |         |         |         |   |          |         |          |   |         |         |         |   |          |         |         |   |          |         |          |   |          |         |          |   |          |         |          |   |          |         |         |   |          |         |         |   |          |         |         |   |          |         |         |   |          |         |         |   |          |         |         |   |          |         |          |   |          |         |         |   |          |         |         |   |         |         |          |                                                                                                                                                                                                                                                                                                                                                                                                                                                                                                                                                                                                                                                                                                                                                                                                                                                                                                                                                                                                                                                                                                                                                                                                                                                                                                                                                                                                                                                                                                                                                                                                                                                                                                                                                                                                                                                                                                                                                                                                                                                                                                                                                                                                                                                                                                                                                                                                                                              |         |         |         |         |         |         |         |          |          |          |          |          |          |          |          |          |          |          |          |          |          |          |          |          |          |          |          |          |          |          |          |          |          |          |          |          |          |          |          |          |          |          |          |          |          |          |          |          |          |          |          |          |          |          |           |           |           |           |           |           |           |           |           |           |           |           |           |           |           |           |           |           |           |           |           |           |           |           |           |           |           |           |           |           |           |           |           |           |           |           |           |           |           |           |           |           |           |           |           |           |           |           |           |           |           |           |           |           |
| 1339.2932         | 1363.9496                                                                                                                                                                                                                                                                                                                                                                                                                                                                                                                                                                                                                                                                                                                                                                                                                                                                                                                                                                                                                                                                                                                                                                                                                                                                                                                                                                                                                                                                                                                                                                                                                                                                                                                                                                                                                                                                                                                                                                                                                                                                                                                                                                                                                                                                                                                                                                                                                                                                                                                                                                                 | 1371.0256          |          |   |   |   |          |          |          |   |          |          |         |    |          |          |          |    |          |          |         |    |         |          |          |   |          |          |         |   |          |          |         |   |          |          |          |   |          |          |          |    |         |         |          |    |         |          |         |   |         |         |          |   |         |          |          |   |         |         |         |   |         |          |          |   |         |         |         |   |         |         |         |   |          |         |          |   |         |         |         |   |          |         |         |   |          |         |          |   |          |         |          |   |          |         |          |   |          |         |         |   |          |         |         |   |          |         |         |   |          |         |         |   |          |         |         |   |          |         |         |   |          |         |          |   |          |         |         |   |          |         |         |   |         |         |          |                                                                                                                                                                                                                                                                                                                                                                                                                                                                                                                                                                                                                                                                                                                                                                                                                                                                                                                                                                                                                                                                                                                                                                                                                                                                                                                                                                                                                                                                                                                                                                                                                                                                                                                                                                                                                                                                                                                                                                                                                                                                                                                                                                                                                                                                                                                                                                                                                                              |         |         |         |         |         |         |         |          |          |          |          |          |          |          |          |          |          |          |          |          |          |          |          |          |          |          |          |          |          |          |          |          |          |          |          |          |          |          |          |          |          |          |          |          |          |          |          |          |          |          |          |          |          |          |           |           |           |           |           |           |           |           |           |           |           |           |           |           |           |           |           |           |           |           |           |           |           |           |           |           |           |           |           |           |           |           |           |           |           |           |           |           |           |           |           |           |           |           |           |           |           |           |           |           |           |           |           |           |
| 1377.0615         | 1407.7258                                                                                                                                                                                                                                                                                                                                                                                                                                                                                                                                                                                                                                                                                                                                                                                                                                                                                                                                                                                                                                                                                                                                                                                                                                                                                                                                                                                                                                                                                                                                                                                                                                                                                                                                                                                                                                                                                                                                                                                                                                                                                                                                                                                                                                                                                                                                                                                                                                                                                                                                                                                 | 1456.8020          |          |   |   |   |          |          |          |   |          |          |         |    |          |          |          |    |          |          |         |    |         |          |          |   |          |          |         |   |          |          |         |   |          |          |          |   |          |          |          |    |         |         |          |    |         |          |         |   |         |         |          |   |         |          |          |   |         |         |         |   |         |          |          |   |         |         |         |   |         |         |         |   |          |         |          |   |         |         |         |   |          |         |         |   |          |         |          |   |          |         |          |   |          |         |          |   |          |         |         |   |          |         |         |   |          |         |         |   |          |         |         |   |          |         |         |   |          |         |         |   |          |         |          |   |          |         |         |   |          |         |         |   |         |         |          |                                                                                                                                                                                                                                                                                                                                                                                                                                                                                                                                                                                                                                                                                                                                                                                                                                                                                                                                                                                                                                                                                                                                                                                                                                                                                                                                                                                                                                                                                                                                                                                                                                                                                                                                                                                                                                                                                                                                                                                                                                                                                                                                                                                                                                                                                                                                                                                                                                              |         |         |         |         |         |         |         |          |          |          |          |          |          |          |          |          |          |          |          |          |          |          |          |          |          |          |          |          |          |          |          |          |          |          |          |          |          |          |          |          |          |          |          |          |          |          |          |          |          |          |          |          |          |          |           |           |           |           |           |           |           |           |           |           |           |           |           |           |           |           |           |           |           |           |           |           |           |           |           |           |           |           |           |           |           |           |           |           |           |           |           |           |           |           |           |           |           |           |           |           |           |           |           |           |           |           |           |           |
| 1463.9925         | 1465.5823                                                                                                                                                                                                                                                                                                                                                                                                                                                                                                                                                                                                                                                                                                                                                                                                                                                                                                                                                                                                                                                                                                                                                                                                                                                                                                                                                                                                                                                                                                                                                                                                                                                                                                                                                                                                                                                                                                                                                                                                                                                                                                                                                                                                                                                                                                                                                                                                                                                                                                                                                                                 | 1476.4074          |          |   |   |   |          |          |          |   |          |          |         |    |          |          |          |    |          |          |         |    |         |          |          |   |          |          |         |   |          |          |         |   |          |          |          |   |          |          |          |    |         |         |          |    |         |          |         |   |         |         |          |   |         |          |          |   |         |         |         |   |         |          |          |   |         |         |         |   |         |         |         |   |          |         |          |   |         |         |         |   |          |         |         |   |          |         |          |   |          |         |          |   |          |         |          |   |          |         |         |   |          |         |         |   |          |         |         |   |          |         |         |   |          |         |         |   |          |         |         |   |          |         |          |   |          |         |         |   |          |         |         |   |         |         |          |                                                                                                                                                                                                                                                                                                                                                                                                                                                                                                                                                                                                                                                                                                                                                                                                                                                                                                                                                                                                                                                                                                                                                                                                                                                                                                                                                                                                                                                                                                                                                                                                                                                                                                                                                                                                                                                                                                                                                                                                                                                                                                                                                                                                                                                                                                                                                                                                                                              |         |         |         |         |         |         |         |          |          |          |          |          |          |          |          |          |          |          |          |          |          |          |          |          |          |          |          |          |          |          |          |          |          |          |          |          |          |          |          |          |          |          |          |          |          |          |          |          |          |          |          |          |          |          |           |           |           |           |           |           |           |           |           |           |           |           |           |           |           |           |           |           |           |           |           |           |           |           |           |           |           |           |           |           |           |           |           |           |           |           |           |           |           |           |           |           |           |           |           |           |           |           |           |           |           |           |           |           |
| 1499.2886         | 1522.2142                                                                                                                                                                                                                                                                                                                                                                                                                                                                                                                                                                                                                                                                                                                                                                                                                                                                                                                                                                                                                                                                                                                                                                                                                                                                                                                                                                                                                                                                                                                                                                                                                                                                                                                                                                                                                                                                                                                                                                                                                                                                                                                                                                                                                                                                                                                                                                                                                                                                                                                                                                                 | 1656.4082          |          |   |   |   |          |          |          |   |          |          |         |    |          |          |          |    |          |          |         |    |         |          |          |   |          |          |         |   |          |          |         |   |          |          |          |   |          |          |          |    |         |         |          |    |         |          |         |   |         |         |          |   |         |          |          |   |         |         |         |   |         |          |          |   |         |         |         |   |         |         |         |   |          |         |          |   |         |         |         |   |          |         |         |   |          |         |          |   |          |         |          |   |          |         |          |   |          |         |         |   |          |         |         |   |          |         |         |   |          |         |         |   |          |         |         |   |          |         |         |   |          |         |          |   |          |         |         |   |          |         |         |   |         |         |          |                                                                                                                                                                                                                                                                                                                                                                                                                                                                                                                                                                                                                                                                                                                                                                                                                                                                                                                                                                                                                                                                                                                                                                                                                                                                                                                                                                                                                                                                                                                                                                                                                                                                                                                                                                                                                                                                                                                                                                                                                                                                                                                                                                                                                                                                                                                                                                                                                                              |         |         |         |         |         |         |         |          |          |          |          |          |          |          |          |          |          |          |          |          |          |          |          |          |          |          |          |          |          |          |          |          |          |          |          |          |          |          |          |          |          |          |          |          |          |          |          |          |          |          |          |          |          |          |           |           |           |           |           |           |           |           |           |           |           |           |           |           |           |           |           |           |           |           |           |           |           |           |           |           |           |           |           |           |           |           |           |           |           |           |           |           |           |           |           |           |           |           |           |           |           |           |           |           |           |           |           |           |
| 1672.9839         | 2270.8461                                                                                                                                                                                                                                                                                                                                                                                                                                                                                                                                                                                                                                                                                                                                                                                                                                                                                                                                                                                                                                                                                                                                                                                                                                                                                                                                                                                                                                                                                                                                                                                                                                                                                                                                                                                                                                                                                                                                                                                                                                                                                                                                                                                                                                                                                                                                                                                                                                                                                                                                                                                 | 2322.1365          |          |   |   |   |          |          |          |   |          |          |         |    |          |          |          |    |          |          |         |    |         |          |          |   |          |          |         |   |          |          |         |   |          |          |          |   |          |          |          |    |         |         |          |    |         |          |         |   |         |         |          |   |         |          |          |   |         |         |         |   |         |          |          |   |         |         |         |   |         |         |         |   |          |         |          |   |         |         |         |   |          |         |         |   |          |         |          |   |          |         |          |   |          |         |          |   |          |         |         |   |          |         |         |   |          |         |         |   |          |         |         |   |          |         |         |   |          |         |         |   |          |         |          |   |          |         |         |   |          |         |         |   |         |         |          |                                                                                                                                                                                                                                                                                                                                                                                                                                                                                                                                                                                                                                                                                                                                                                                                                                                                                                                                                                                                                                                                                                                                                                                                                                                                                                                                                                                                                                                                                                                                                                                                                                                                                                                                                                                                                                                                                                                                                                                                                                                                                                                                                                                                                                                                                                                                                                                                                                              |         |         |         |         |         |         |         |          |          |          |          |          |          |          |          |          |          |          |          |          |          |          |          |          |          |          |          |          |          |          |          |          |          |          |          |          |          |          |          |          |          |          |          |          |          |          |          |          |          |          |          |          |          |          |           |           |           |           |           |           |           |           |           |           |           |           |           |           |           |           |           |           |           |           |           |           |           |           |           |           |           |           |           |           |           |           |           |           |           |           |           |           |           |           |           |           |           |           |           |           |           |           |           |           |           |           |           |           |
| 2369.3371         | 3081.0449                                                                                                                                                                                                                                                                                                                                                                                                                                                                                                                                                                                                                                                                                                                                                                                                                                                                                                                                                                                                                                                                                                                                                                                                                                                                                                                                                                                                                                                                                                                                                                                                                                                                                                                                                                                                                                                                                                                                                                                                                                                                                                                                                                                                                                                                                                                                                                                                                                                                                                                                                                                 | 3088.9160          |          |   |   |   |          |          |          |   |          |          |         |    |          |          |          |    |          |          |         |    |         |          |          |   |          |          |         |   |          |          |         |   |          |          |          |   |          |          |          |    |         |         |          |    |         |          |         |   |         |         |          |   |         |          |          |   |         |         |         |   |         |          |          |   |         |         |         |   |         |         |         |   |          |         |          |   |         |         |         |   |          |         |         |   |          |         |          |   |          |         |          |   |          |         |          |   |          |         |         |   |          |         |         |   |          |         |         |   |          |         |         |   |          |         |         |   |          |         |         |   |          |         |          |   |          |         |         |   |          |         |         |   |         |         |          |                                                                                                                                                                                                                                                                                                                                                                                                                                                                                                                                                                                                                                                                                                                                                                                                                                                                                                                                                                                                                                                                                                                                                                                                                                                                                                                                                                                                                                                                                                                                                                                                                                                                                                                                                                                                                                                                                                                                                                                                                                                                                                                                                                                                                                                                                                                                                                                                                                              |         |         |         |         |         |         |         |          |          |          |          |          |          |          |          |          |          |          |          |          |          |          |          |          |          |          |          |          |          |          |          |          |          |          |          |          |          |          |          |          |          |          |          |          |          |          |          |          |          |          |          |          |          |          |           |           |           |           |           |           |           |           |           |           |           |           |           |           |           |           |           |           |           |           |           |           |           |           |           |           |           |           |           |           |           |           |           |           |           |           |           |           |           |           |           |           |           |           |           |           |           |           |           |           |           |           |           |           |
| 3120.0753         | 3124.2243                                                                                                                                                                                                                                                                                                                                                                                                                                                                                                                                                                                                                                                                                                                                                                                                                                                                                                                                                                                                                                                                                                                                                                                                                                                                                                                                                                                                                                                                                                                                                                                                                                                                                                                                                                                                                                                                                                                                                                                                                                                                                                                                                                                                                                                                                                                                                                                                                                                                                                                                                                                 | 3146.0422          |          |   |   |   |          |          |          |   |          |          |         |    |          |          |          |    |          |          |         |    |         |          |          |   |          |          |         |   |          |          |         |   |          |          |          |   |          |          |          |    |         |         |          |    |         |          |         |   |         |         |          |   |         |          |          |   |         |         |         |   |         |          |          |   |         |         |         |   |         |         |         |   |          |         |          |   |         |         |         |   |          |         |         |   |          |         |          |   |          |         |          |   |          |         |          |   |          |         |         |   |          |         |         |   |          |         |         |   |          |         |         |   |          |         |         |   |          |         |         |   |          |         |          |   |          |         |         |   |          |         |         |   |         |         |          |                                                                                                                                                                                                                                                                                                                                                                                                                                                                                                                                                                                                                                                                                                                                                                                                                                                                                                                                                                                                                                                                                                                                                                                                                                                                                                                                                                                                                                                                                                                                                                                                                                                                                                                                                                                                                                                                                                                                                                                                                                                                                                                                                                                                                                                                                                                                                                                                                                              |         |         |         |         |         |         |         |          |          |          |          |          |          |          |          |          |          |          |          |          |          |          |          |          |          |          |          |          |          |          |          |          |          |          |          |          |          |          |          |          |          |          |          |          |          |          |          |          |          |          |          |          |          |          |           |           |           |           |           |           |           |           |           |           |           |           |           |           |           |           |           |           |           |           |           |           |           |           |           |           |           |           |           |           |           |           |           |           |           |           |           |           |           |           |           |           |           |           |           |           |           |           |           |           |           |           |           |           |
| 3153.9497         | 3154.2942                                                                                                                                                                                                                                                                                                                                                                                                                                                                                                                                                                                                                                                                                                                                                                                                                                                                                                                                                                                                                                                                                                                                                                                                                                                                                                                                                                                                                                                                                                                                                                                                                                                                                                                                                                                                                                                                                                                                                                                                                                                                                                                                                                                                                                                                                                                                                                                                                                                                                                                                                                                 | 3165.3651          |          |   |   |   |          |          |          |   |          |          |         |    |          |          |          |    |          |          |         |    |         |          |          |   |          |          |         |   |          |          |         |   |          |          |          |   |          |          |          |    |         |         |          |    |         |          |         |   |         |         |          |   |         |          |          |   |         |         |         |   |         |          |          |   |         |         |         |   |         |         |         |   |          |         |          |   |         |         |         |   |          |         |         |   |          |         |          |   |          |         |          |   |          |         |          |   |          |         |         |   |          |         |         |   |          |         |         |   |          |         |         |   |          |         |         |   |          |         |         |   |          |         |          |   |          |         |         |   |          |         |         |   |         |         |          |                                                                                                                                                                                                                                                                                                                                                                                                                                                                                                                                                                                                                                                                                                                                                                                                                                                                                                                                                                                                                                                                                                                                                                                                                                                                                                                                                                                                                                                                                                                                                                                                                                                                                                                                                                                                                                                                                                                                                                                                                                                                                                                                                                                                                                                                                                                                                                                                                                              |         |         |         |         |         |         |         |          |          |          |          |          |          |          |          |          |          |          |          |          |          |          |          |          |          |          |          |          |          |          |          |          |          |          |          |          |          |          |          |          |          |          |          |          |          |          |          |          |          |          |          |          |          |          |           |           |           |           |           |           |           |           |           |           |           |           |           |           |           |           |           |           |           |           |           |           |           |           |           |           |           |           |           |           |           |           |           |           |           |           |           |           |           |           |           |           |           |           |           |           |           |           |           |           |           |           |           |           |
| 3168.2760         | 3177.4667                                                                                                                                                                                                                                                                                                                                                                                                                                                                                                                                                                                                                                                                                                                                                                                                                                                                                                                                                                                                                                                                                                                                                                                                                                                                                                                                                                                                                                                                                                                                                                                                                                                                                                                                                                                                                                                                                                                                                                                                                                                                                                                                                                                                                                                                                                                                                                                                                                                                                                                                                                                 | 3179.0734          |          |   |   |   |          |          |          |   |          |          |         |    |          |          |          |    |          |          |         |    |         |          |          |   |          |          |         |   |          |          |         |   |          |          |          |   |          |          |          |    |         |         |          |    |         |          |         |   |         |         |          |   |         |          |          |   |         |         |         |   |         |          |          |   |         |         |         |   |         |         |         |   |          |         |          |   |         |         |         |   |          |         |         |   |          |         |          |   |          |         |          |   |          |         |          |   |          |         |         |   |          |         |         |   |          |         |         |   |          |         |         |   |          |         |         |   |          |         |         |   |          |         |          |   |          |         |         |   |          |         |         |   |         |         |          |                                                                                                                                                                                                                                                                                                                                                                                                                                                                                                                                                                                                                                                                                                                                                                                                                                                                                                                                                                                                                                                                                                                                                                                                                                                                                                                                                                                                                                                                                                                                                                                                                                                                                                                                                                                                                                                                                                                                                                                                                                                                                                                                                                                                                                                                                                                                                                                                                                              |         |         |         |         |         |         |         |          |          |          |          |          |          |          |          |          |          |          |          |          |          |          |          |          |          |          |          |          |          |          |          |          |          |          |          |          |          |          |          |          |          |          |          |          |          |          |          |          |          |          |          |          |          |          |           |           |           |           |           |           |           |           |           |           |           |           |           |           |           |           |           |           |           |           |           |           |           |           |           |           |           |           |           |           |           |           |           |           |           |           |           |           |           |           |           |           |           |           |           |           |           |           |           |           |           |           |           |           |
| 3191.6037         | 3205.8801                                                                                                                                                                                                                                                                                                                                                                                                                                                                                                                                                                                                                                                                                                                                                                                                                                                                                                                                                                                                                                                                                                                                                                                                                                                                                                                                                                                                                                                                                                                                                                                                                                                                                                                                                                                                                                                                                                                                                                                                                                                                                                                                                                                                                                                                                                                                                                                                                                                                                                                                                                                 | 3255.2679          |          |   |   |   |          |          |          |   |          |          |         |    |          |          |          |    |          |          |         |    |         |          |          |   |          |          |         |   |          |          |         |   |          |          |          |   |          |          |          |    |         |         |          |    |         |          |         |   |         |         |          |   |         |          |          |   |         |         |         |   |         |          |          |   |         |         |         |   |         |         |         |   |          |         |          |   |         |         |         |   |          |         |         |   |          |         |          |   |          |         |          |   |          |         |          |   |          |         |         |   |          |         |         |   |          |         |         |   |          |         |         |   |          |         |         |   |          |         |         |   |          |         |          |   |          |         |         |   |          |         |         |   |         |         |          |                                                                                                                                                                                                                                                                                                                                                                                                                                                                                                                                                                                                                                                                                                                                                                                                                                                                                                                                                                                                                                                                                                                                                                                                                                                                                                                                                                                                                                                                                                                                                                                                                                                                                                                                                                                                                                                                                                                                                                                                                                                                                                                                                                                                                                                                                                                                                                                                                                              |         |         |         |         |         |         |         |          |          |          |          |          |          |          |          |          |          |          |          |          |          |          |          |          |          |          |          |          |          |          |          |          |          |          |          |          |          |          |          |          |          |          |          |          |          |          |          |          |          |          |          |          |          |          |           |           |           |           |           |           |           |           |           |           |           |           |           |           |           |           |           |           |           |           |           |           |           |           |           |           |           |           |           |           |           |           |           |           |           |           |           |           |           |           |           |           |           |           |           |           |           |           |           |           |           |           |           |           |
| 3273.7456         | 3279.5012                                                                                                                                                                                                                                                                                                                                                                                                                                                                                                                                                                                                                                                                                                                                                                                                                                                                                                                                                                                                                                                                                                                                                                                                                                                                                                                                                                                                                                                                                                                                                                                                                                                                                                                                                                                                                                                                                                                                                                                                                                                                                                                                                                                                                                                                                                                                                                                                                                                                                                                                                                                 | 3300.5087          |          |   |   |   |          |          |          |   |          |          |         |    |          |          |          |    |          |          |         |    |         |          |          |   |          |          |         |   |          |          |         |   |          |          |          |   |          |          |          |    |         |         |          |    |         |          |         |   |         |         |          |   |         |          |          |   |         |         |         |   |         |          |          |   |         |         |         |   |         |         |         |   |          |         |          |   |         |         |         |   |          |         |         |   |          |         |          |   |          |         |          |   |          |         |          |   |          |         |         |   |          |         |         |   |          |         |         |   |          |         |         |   |          |         |         |   |          |         |         |   |          |         |          |   |          |         |         |   |          |         |         |   |         |         |          |                                                                                                                                                                                                                                                                                                                                                                                                                                                                                                                                                                                                                                                                                                                                                                                                                                                                                                                                                                                                                                                                                                                                                                                                                                                                                                                                                                                                                                                                                                                                                                                                                                                                                                                                                                                                                                                                                                                                                                                                                                                                                                                                                                                                                                                                                                                                                                                                                                              |         |         |         |         |         |         |         |          |          |          |          |          |          |          |          |          |          |          |          |          |          |          |          |          |          |          |          |          |          |          |          |          |          |          |          |          |          |          |          |          |          |          |          |          |          |          |          |          |          |          |          |          |          |          |           |           |           |           |           |           |           |           |           |           |           |           |           |           |           |           |           |           |           |           |           |           |           |           |           |           |           |           |           |           |           |           |           |           |           |           |           |           |           |           |           |           |           |           |           |           |           |           |           |           |           |           |           |           |

|    |         |          |          |
|----|---------|----------|----------|
| H  | 2.27693 | 0.35974  | 2.91188  |
| H  | 0.28682 | 1.40449  | 3.74640  |
| H  | 0.17561 | -0.92328 | 3.13786  |
| Si | 0.81421 | 0.36641  | 2.83325  |
| Ni | 2.56226 | -0.08029 | -0.35515 |

**Statistical Thermodynamic Analysis**

|                                     |                                               |
|-------------------------------------|-----------------------------------------------|
| Temperature=298.15 K                | Pressure=1 atm                                |
| Zero-point correction= 0.285467     | Electronic Energy = -2886.65387850            |
| Internal Energy (E)= -2886.3424815  | Enthalpy (H)= -2886.3415375                   |
| Gibbs Free Energy (G)=-2886.4253685 | Gibbs Free Energy of Solvation=-2886.44575288 |
